# Supplementary material for: Tandem Mass Tagging-Based Quantitative Proteomics Analysis Reveals Damage to the Liver and Brain of Hypophthalmichthys molitrix Exposed to Acute Hypoxia and Reoxygenation
Source: MDPI journal article supplement (doi:10.3390/antiox11030589), 2022-03-19
Supplement: s1 [file s1]

A

**Cellular Processes**  
 Transport and catabolism  
 Cellular community – eukaryotes  
 Cell motility  
 Cell growth and death

**Environmental Information Processing**  
 Signaling molecules and interaction  
 Signal transduction  
 Membrane transport

**Genetic Information Processing**  
 Translation  
 Transcription  
 Replication and repair  
 Folding, sorting and degradation

**Metabolism**  
 Xenobiotics biodegradation and metabolism  
 Nucleotide metabolism  
 Metabolism of terpenoids and polyketides  
 Metabolism of other amino acids  
 Metabolism of cofactors and vitamins  
 Lipid metabolism  
 Glycan biosynthesis and metabolism  
 Global and overview maps  
 Energy metabolism  
 Carbohydrate metabolism  
 Biosynthesis of other secondary metabolites  
 Amino acid metabolism

**Organismal Systems**  
 Sensory system  
 Nervous system  
 Immune system  
 Excretory system  
 Environmental adaptation  
 Endocrine system  
 Digestive system  
 Development  
 Circulatory system  
 Aging

## KEGG pathway annotation

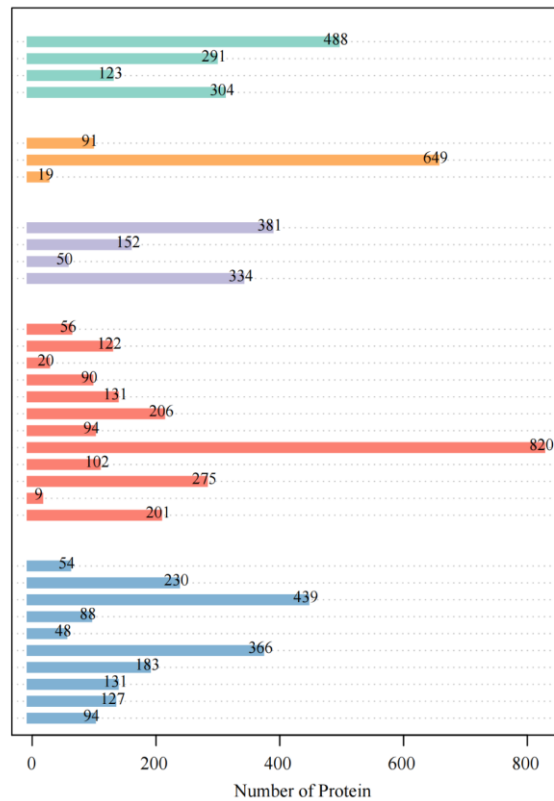

B

**Cellular Processes**  
 Transport and catabolism  
 Cellular community – eukaryotes  
 Cell motility  
 Cell growth and death

**Environmental Information Processing**  
 Signaling molecules and interaction  
 Signal transduction  
 Membrane transport

**Genetic Information Processing**  
 Translation  
 Transcription  
 Replication and repair  
 Folding, sorting and degradation

**Metabolism**  
 Xenobiotics biodegradation and metabolism  
 Nucleotide metabolism  
 Metabolism of terpenoids and polyketides  
 Metabolism of other amino acids  
 Metabolism of cofactors and vitamins  
 Lipid metabolism  
 Glycan biosynthesis and metabolism  
 Global and overview maps  
 Energy metabolism  
 Carbohydrate metabolism  
 Biosynthesis of other secondary metabolites  
 Amino acid metabolism

**Organismal Systems**  
 Sensory system  
 Nervous system  
 Immune system  
 Excretory system  
 Environmental adaptation  
 Endocrine system  
 Digestive system  
 Development  
 Circulatory system  
 Aging

## KEGG pathway annotation

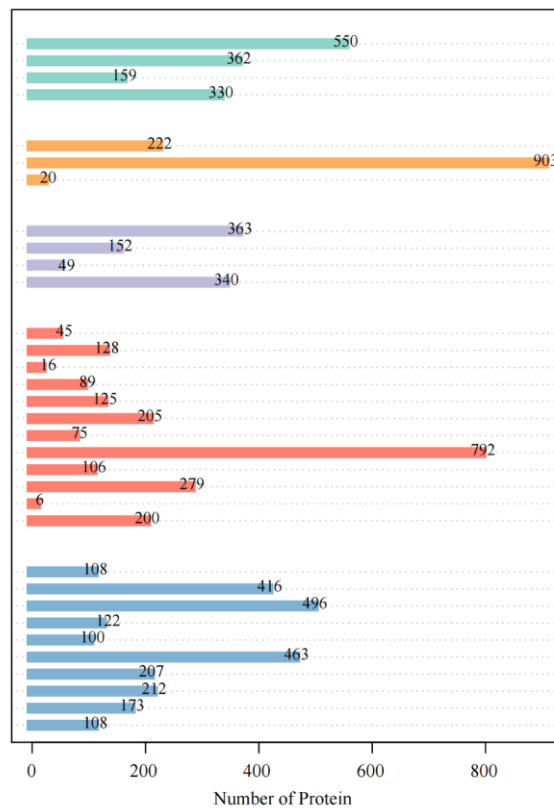

Figure S8. Proteins number distribution with KEGG in liver (A) and brain (B).
