# Supplementary material for: Tandem Mass Tagging-Based Quantitative Proteomics Analysis Reveals Damage to the Liver and Brain of Hypophthalmichthys molitrix Exposed to Acute Hypoxia and Reoxygenation
Source: MDPI journal article supplement (doi:10.3390/antiox11030589), 2022-03-19
Supplement: s1 [file s1]

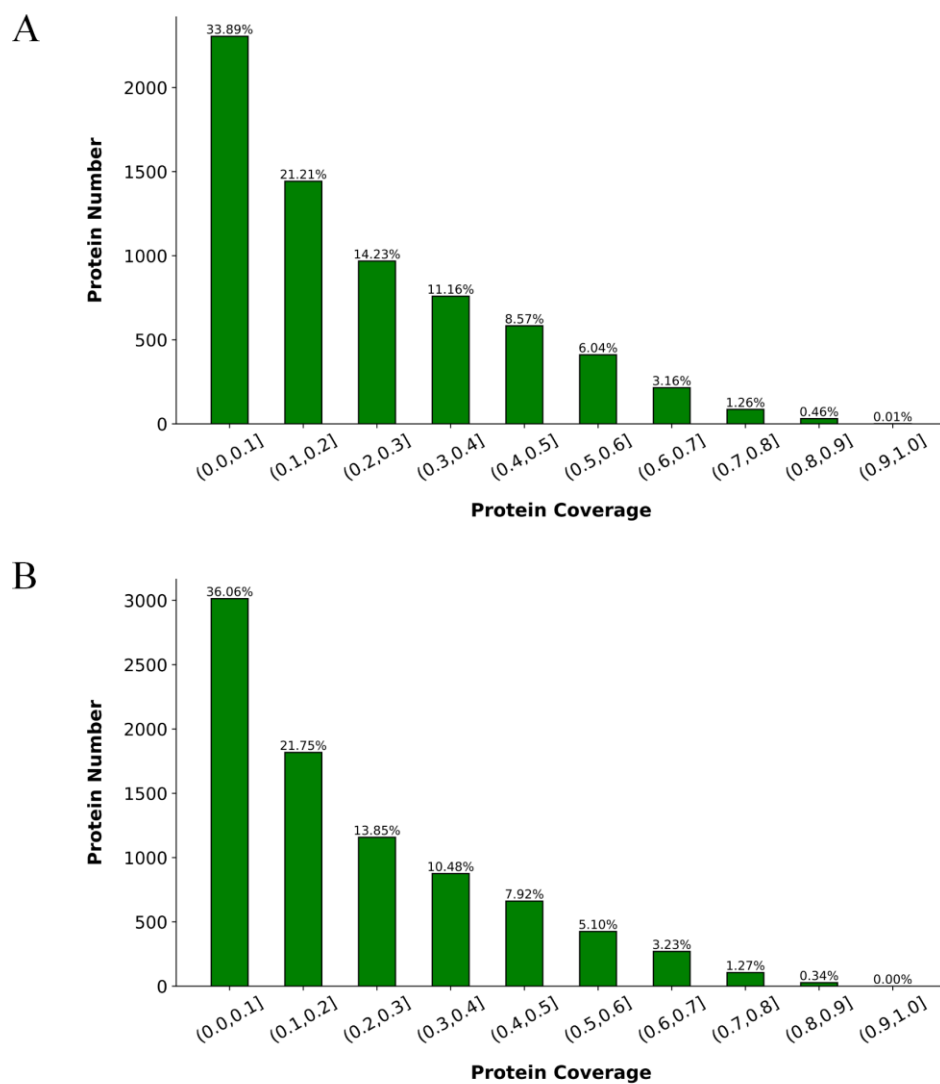

Figure S4. Protein coverage distribution map in liver (A) and brain (B). The abscissa indicates the protein coverage interval (the length of protein that covered by detected peptide/full-length the protein) and the ordinate is the protein number in each interval.
