# Supplementary material for: Tandem Mass Tagging-Based Quantitative Proteomics Analysis Reveals Damage to the Liver and Brain of Hypophthalmichthys molitrix Exposed to Acute Hypoxia and Reoxygenation
Source: MDPI journal article supplement (doi:10.3390/antiox11030589), 2022-03-19
Supplement: s1 [file s1]

A

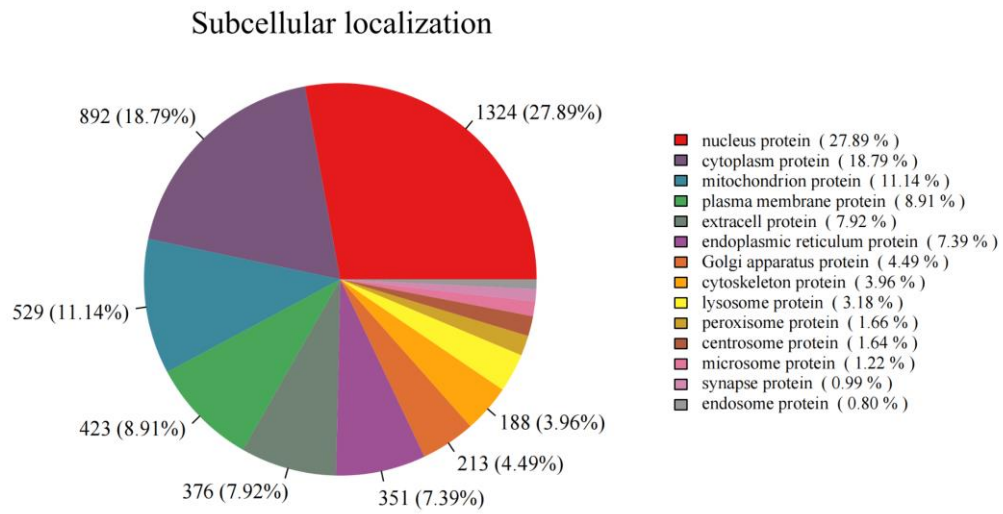

B

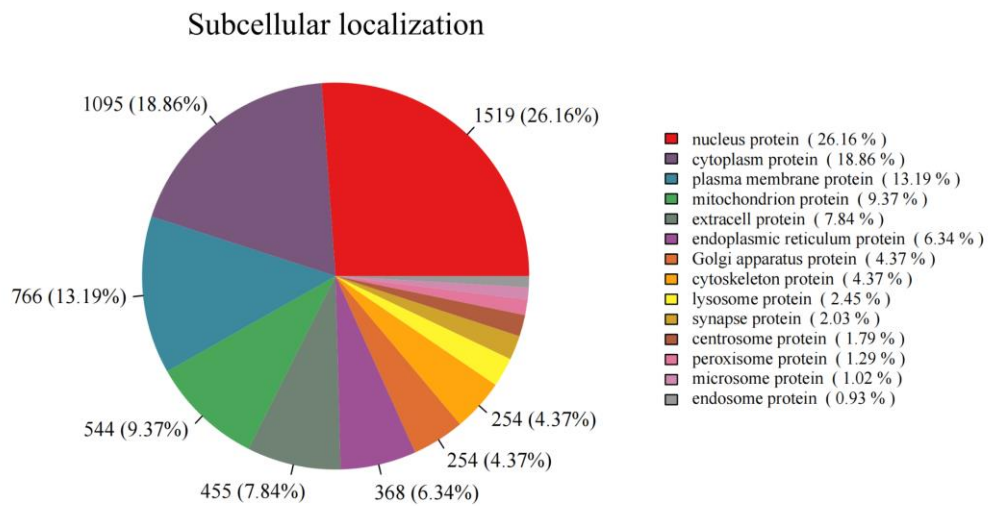

Figure S10. The statistical results of subcellular localization of quantified proteins in liver (A) and brain (B).
