# Supplementary material for: Tandem Mass Tagging-Based Quantitative Proteomics Analysis Reveals Damage to the Liver and Brain of Hypophthalmichthys molitrix Exposed to Acute Hypoxia and Reoxygenation
Source: MDPI journal article supplement (doi:10.3390/antiox11030589), 2022-03-19
Supplement: s1 [file s1]

**Table S1 All information of the indicators**

| <b>Sample</b> | <b>Indicator</b>                       | <b>Product Code</b> |
|---------------|----------------------------------------|---------------------|
| Serum         | glutamic-pyruvic transaminase (ALT)    | C009-3-1            |
| Serum         | glutamic-oxalacetic transaminase (AST) | C010-3-1            |
| Serum         | alkaline phosphatase (ALP)             | A059-3-1            |
| Serum         | total protein (TP)                     | A045-3-2            |
| Serum         | albumin (ALB)                          | A028-1-1            |
| Serum         | globulin (GLB)                         | E026-1-1            |
| Serum         | total cholesterol (TC)                 | A111-1-1            |
| Brain         | acetylcholine (ACh)                    | A105-1-1            |
| Brain         | dopamine (DA)                          | H170                |

**Note:** The indicators were measured using reagent kits and all kits were purchased at Nanjing Jiancheng Institute of Biotechnology, and the operation was according to the manufacturer's instructions.
