# Supplementary material for: Tandem Mass Tagging-Based Quantitative Proteomics Analysis Reveals Damage to the Liver and Brain of Hypophthalmichthys molitrix Exposed to Acute Hypoxia and Reoxygenation
Source: MDPI journal article supplement (doi:10.3390/antiox11030589), 2022-03-19
Supplement: s1 [file s1]

**Table S2 The primer sequences of DAPs used for RT-qPCR.**

| Group                   | Gene           | Forward primer (5'-3')   | Reverse primer (5'-3')    |
|-------------------------|----------------|--------------------------|---------------------------|
| Liver<br>hy_5h vs ck_0h | <i>ITIH3</i>   | TGGTCAGTTCTACCGTGGATTG   | GGGCACTTGTTCTCCGTTCTT     |
|                         | <i>PLIN2</i>   | GGTGAGGAGGAAGGATTCATAGT  | TGGTCATTTGAGTCACAGTCGC    |
|                         | <i>Ca4</i>     | TGCTGGAGTCACAGGACATTCA   | CCACACTCTCCGTTCACTTCAC    |
|                         | <i>Epdr1</i>   | GCAGGAGACATACACAAAGAACAG | GAGAGGTATTACAGCAGTCAGATGT |
|                         | <i>AMPD1</i>   | GTGCGAGATTGCCAGGAACAGT   | TGCGGATGTCGTTGCCCTCT      |
|                         | <i>Mpo</i>     | AGGCTGTGCGGCTCAAGTTC     | GTGGGTTCCCTCCTGTTGTTTGC   |
|                         | <i>Tcf25</i>   | CACACAAACAGCCCATAAGCAGAA | TCCACATCAGCCTCACCTATCTCT  |
| Liver<br>re_5h vs hy_0h | <i>SESN1</i>   | GATGCTGAGGTGCCGTCTGT     | CGCTCTCACACTCACACTAACAC   |
|                         | <i>SULT3A1</i> | TGTTTAGTTGGCGTTTCATCTTGG | CGAGGCTGTGATTACCATGACCAT  |
|                         | <i>CEACAM3</i> | CTGGAGGGACACTTACTGGAGAA  | CCATCATGATCGAGCTCTCAACTGT |
|                         | <i>CAV1</i>    | CCGCAGGAATACTCACTCAC     | GTCCACCTTCACCACATTGTCATT  |
|                         | <i>COMT</i>    | CGCCCTTTCTAATTCCTCACCAT  | GCAGAGAGCATATTGACCCAGTAG  |
|                         | <i>Ctsf</i>    | GGACCATTCTCAGCCAACCAAG   | CTACACAGGACACAAGCAGAGC    |
|                         | <i>tdo2a</i>   | AGCAGCAGCAGCGATGACT      | TGGTGATGGTAGGCTTGTGAGT    |
| Liver<br>re_5h vs ck_0h | <i>Mybpc2</i>  | GAAGCAGCGTCAACAGCAGAGA   | GAGCCGCCGTTAGTCATTCCAT    |
|                         | <i>usp16</i>   | AGCAGCGTCAGTGATGATGGA    | CCGTCTCTGATTCTTGGCTTGTT   |
|                         | <i>PSAT1</i>   | GCCCAGCGAGTTTCTTTCCGAT   | TTGTCCGAGGTGCCATGATTGTC   |
|                         | <i>UBA52</i>   | GCGTCTCAGAGGAGGCATCAT    | GCGTAACACTTGCGGCAGAT      |
|                         | <i>ASPG</i>    | TGTGGGTGTCCTGCGATTCTTC   | CCGCTGCCGTAAGTCTCCAATA    |
| Brain<br>hy_5h vs ck_0h | <i>PLA2G4C</i> | AAGAGGGTGGCTGGGAAATGGT   | TCGCCTTCATCAGTCGGTGTCA    |
|                         | <i>SLC6A15</i> | AGCGAGACAACAAGTCCACTT    | GAAGCCCAGCACAGCGAACA      |
|                         | <i>gltp</i>    | CCTCATCTTCCCTCCCTCCCAGT  | CGCAGCACGGACCCTAATTGT     |

|                         |                 |                          |                          |
|-------------------------|-----------------|--------------------------|--------------------------|
| Brain<br>re_5h vs hy_0h | <i>usp33</i>    | GCAGTGGTACGAGTTCGATGAC   | TCACCTTCCGCCTCTCCTTCT    |
|                         | <i>DNER</i>     | ACCTGCGATGTATGATGCGACTC  | GGCTGTGTGTATGCGGTGTGT    |
|                         | <i>TCN2</i>     | AACCTACCCAATCCCAGTGTGC   | GCCGACCACCAACTCACCATT    |
|                         | <i>nbas</i>     | ACACCCGTAAGACCTTCGTTT    | CATCAAGGCTGAACCTCTGTAGTC |
|                         | <i>C1QL2</i>    | AGCAGCAGGTAGATGAAGGACTC  | TGGCGGTCAGTTCTCTCAGTG    |
|                         | <i>Cyp2j6</i>   | GACCACCTCCACCACTCTGTACTG | ACCCTCCCACAACACGATCAATCT |
|                         | <i>ELMO1</i>    | GGATGGCTGGCTCTGGATAACA   | CAATGCTACTGCGACCGAATGG   |
|                         | <i>URH1</i>     | CACAGACAAGGCTCGCTTTATG   | ATGAATCCCTGCCCATCCACCA   |
|                         | <i>CFH</i>      | CAACAACCACGACGACCACAA    | ACACCTCCTACACTCAATCCAAC  |
| Brain<br>re_5h vs ck_0h | <i>DPY19L1</i>  | TCTACGCTCCTGTTGTTCTCT    | CCTGTCCTTCTCGCTGCTCT     |
|                         | <i>Cacna2d1</i> | AATCTGGTGCTTATTGTTGCTGAC | CCGTGGGTTCTGGGCTATCT     |
|                         | <i>mul1</i>     | GCCTGTGCCACGCTATTCTACC   | AGACACATCATCCTCCGCCAGA   |
|                         | <i>STBD1</i>    | AAGAGGACGAAGAACTGGCGAATA | GCTGGCTAGGAGAGTATGTGATGT |
|                         | <i>BCR</i>      | CCTTGAAGCCTGACCGATTG     | CACAGACAGGGGACTTTTCTTTTC |
|                         | <i>β-actin</i>  | GAACCCCAAAGCCAACAG       | CAGAGTCCATCACGATACCAG    |

---
