# Supplementary material for: Tandem Mass Tagging-Based Quantitative Proteomics Analysis Reveals Damage to the Liver and Brain of Hypophthalmichthys molitrix Exposed to Acute Hypoxia and Reoxygenation
Source: MDPI journal article supplement (doi:10.3390/antiox11030589), 2022-03-19
Supplement: s1 [file s1]

A

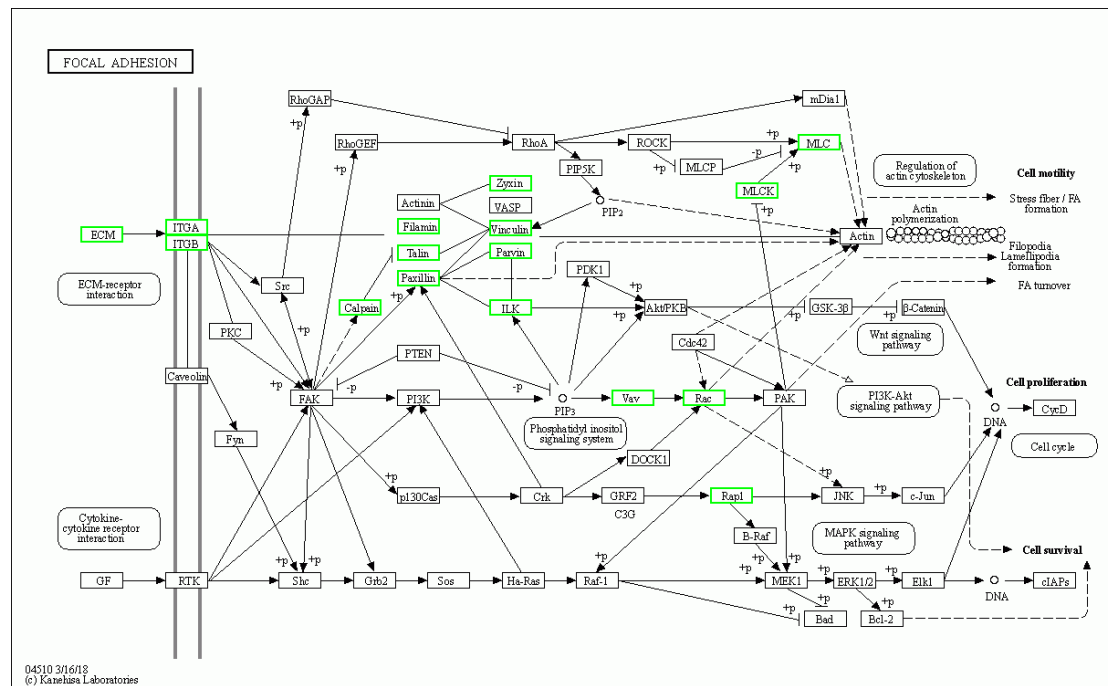

B

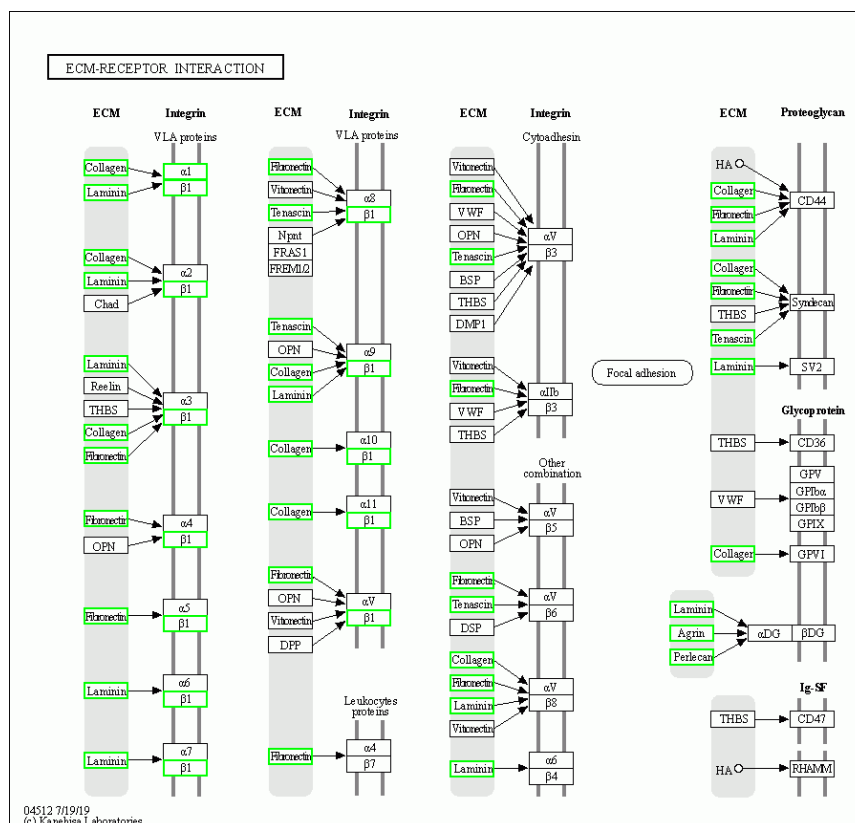

Figure S12. Focal adhesion (A) and ECM-receptor interaction (B) pathways in liver. Proteins in the green box indicate the DAPs involved in cytoskeleton organization.
