# Supplementary material for: Tandem Mass Tagging-Based Quantitative Proteomics Analysis Reveals Damage to the Liver and Brain of Hypophthalmichthys molitrix Exposed to Acute Hypoxia and Reoxygenation
Source: MDPI journal article supplement (doi:10.3390/antiox11030589), 2022-03-19
Supplement: s1 [file s1]

**Table S11. Measurement of intracellular GSH content and GSH/GSSG ratio in liver and brain.**

| Sample | Indicator                                                   | Group               | Value                 |
|--------|-------------------------------------------------------------|---------------------|-----------------------|
| Liver  | Reduced glutathione (GSH) content ( $\mu\text{mol/gport}$ ) | Control group       | $143.38 \pm 9.21$     |
|        |                                                             | Hypoxia group       | $138.73 \pm 7.43^*$   |
|        |                                                             | Reoxygenation group | $119.64 \pm 5.25^*$   |
|        | Toal glutathione/Oxidized glutathione (T-GSH/GSSG)          | Control group       | $47.61 \pm 2.46$      |
|        |                                                             | Hypoxia group       | $34.31 \pm 1.95^*$    |
|        |                                                             | Reoxygenation group | $27.64 \pm 1.37^{**}$ |
| Brain  | Reduced glutathione (GSH) content ( $\mu\text{mol/gport}$ ) | Control group       | $44.38 \pm 2.36$      |
|        |                                                             | Hypoxia group       | $28.53 \pm 1.94^{**}$ |
|        |                                                             | Reoxygenation group | $20.38 \pm 1.85^{**}$ |
|        | Toal glutathione/Oxidized glutathione (T-GSH/GSSH)          | Control group       | $35.84 \pm 2.13$      |
|        |                                                             | Hypoxia group       | $27.01 \pm 1.77^*$    |
|        |                                                             | Reoxygenation group | $22.67 \pm 1.21^{**}$ |

**Note:** Values are expressed as the mean  $\pm$  SD. The \*  $p < 0.05$  and \*\*  $p < 0.01$  indicate significant differences compared with the control group. The indicators were measured using Reduced glutathione (GSH) assay kit (Product Code: A006-2-1), Toal glutathione/Oxidized glutathione assay kit (Product Code: A061-1-2). Both kits were purchased from Nanjing Jiancheng Institute of Biotechnology, and the operation was according to the manufacturer's instructions.
