# Supplementary material for: Tandem Mass Tagging-Based Quantitative Proteomics Analysis Reveals Damage to the Liver and Brain of Hypophthalmichthys molitrix Exposed to Acute Hypoxia and Reoxygenation
Source: MDPI journal article supplement (doi:10.3390/antiox11030589), 2022-03-19
Supplement: s1 [file s1]

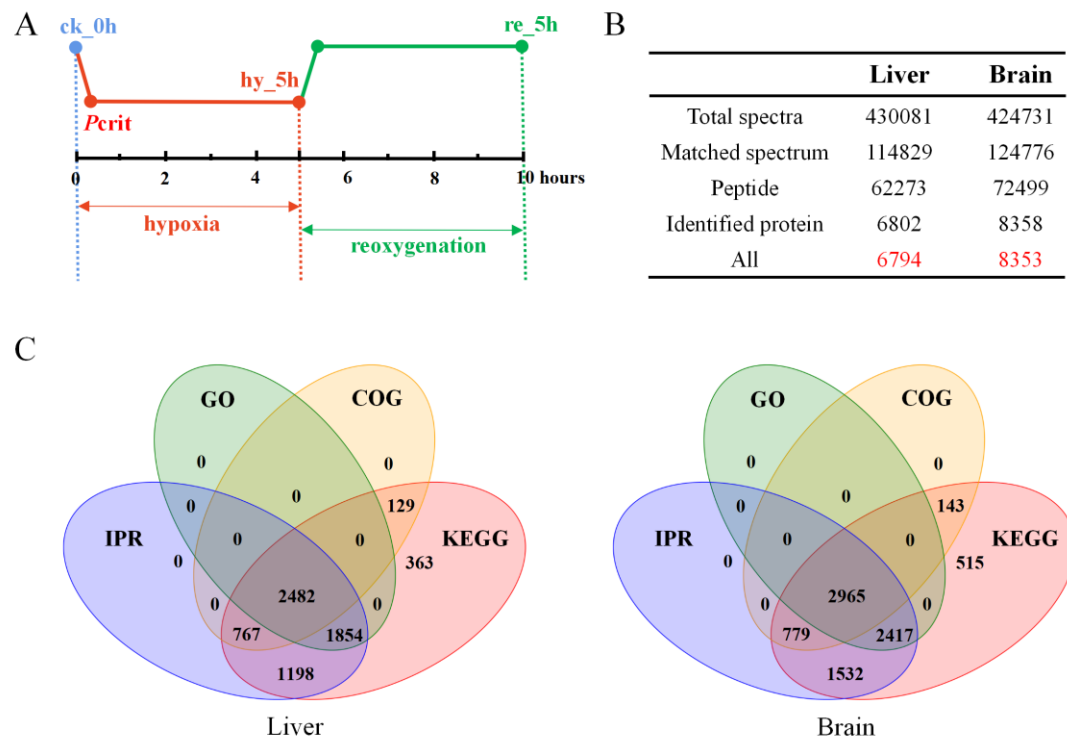

Figure S1. Analysis of the proteome in the liver and brain. (A) A schematic diagram of the experimental procedure. *Pcrit*, The critical oxygen tension of the experimental fish. (B) The total spectra, peptides, and proteins identified in the liver and brain, respectively. (C) Venn diagram of the statistics of the functional annotation in the liver and brain.
