# Supplementary material for: Tandem Mass Tagging-Based Quantitative Proteomics Analysis Reveals Damage to the Liver and Brain of Hypophthalmichthys molitrix Exposed to Acute Hypoxia and Reoxygenation
Source: Antioxidants (Basel). 2022 Mar 19;11(3):589. doi: 10.3390/antiox11030589 (PMC8945220; doi:10.3390/antiox11030589)
Supplement: Supplementary file 1 [file antioxidants-11-00589-s001.zip]

Archive with 23 entries (23 files):
- Figure S1.pdf
- Figure S10.pdf
- Figure S11.pdf
- Figure S12.pdf
- Figure S2.pdf
- Figure S3.pdf
- Figure S4.pdf
- Figure S5.pdf
- Figure S6.pdf
- Figure S7.pdf
- Figure S8.pdf
- Figure S9.pdf
- Table S1.pdf
- Table S10.xls
- Table S11.pdf
- Table S2.pdf
- Table S3.xls
- Table S4.xls
- Table S5.xls
- Table S6.xls
- Table S7.xls
- Table S8.xls
- Table S9.xls
