# Supplementary material for: Tandem Mass Tagging-Based Quantitative Proteomics Analysis Reveals Damage to the Liver and Brain of Hypophthalmichthys molitrix Exposed to Acute Hypoxia and Reoxygenation
Source: Antioxidants (Basel). 2022 Mar 19;11(3):589. doi: 10.3390/antiox11030589 (PMC8945220; doi:10.3390/antiox11030589)
Supplement: Supplementary file 1 [file antioxidants-11-00589-s001.zip › Table S3.xls]

## Sheet: Liver
Table S3. All quantified proteins in liver and brain of Hypophthalmichthys molitrix.
Protein	ck_0h_1	ck_0h_2	ck_0h_3	hy_5h_1	hy_5h_2	hy_5h_3	re_5h_1	re_5h_2	re_5h_3
CAFS_HM_T_00043379	35264.3	35489.2	36023.4	38562.4	34207.7	37395	37511.4	35237	36275.2
CAFS_HM_T_00033529	35877.7	35964.1	36598.8	36328.1	32495	33436.5	33611.3	34108.9	33076.8
CAFS_HM_T_00052219	35156.5	35185.6	35646.8	34627.8	35515.3	35262.2	35006.3	35269.7	34847
CAFS_HM_T_00091449	33331.2	33051.3	32959.6	32316.8	33120.4	32173.4	32206.7	31703.4	31817.3
CAFS_HM_T_00066111	30396.2	29990.4	30574.6	30097	30331.1	31753.4	32906.8	32192	32863.3
CAFS_HM_T_00056393	33390.2	34280	31340.6	22439.1	30422.8	17909.8	13514	13197.2	12870.6
CAFS_HM_T_00065840	22331.5	22405.3	22793.1	23413.7	23219.6	24641.1	25097.2	24766.5	24756.1
CAFS_HM_T_00020544	32011.1	32427.2	32519.9	35951.8	34085.4	36270	38205	36845.9	38006.8
CAFS_HM_T_00016615	36161.2	37504.7	33427.1	23143.7	37528.9	17873.6	12838.6	12458.2	11814.8
CAFS_HM_T_00075212	24432.4	24072.8	24715.5	26734.1	26547.8	28202.5	28509	27660.1	28360.5
CAFS_HM_T_00006824	23354.9	23486.9	22840.4	20343.3	22970.3	19432.9	17705.5	17744.8	17731.5
CAFS_HM_T_00007488	5850.1	5726.9	5611.9	5755	5754.8	5875.9	6096.9	5826.2	6017.7
CAFS_HM_T_00002604	17288.4	17438	17276.2	16418	16869.2	16218.4	15090.3	15196.9	15036.3
CAFS_HM_T_00082002	29978.8	30577.5	28719.2	25326	27914.4	22922.3	21430.3	21871.4	21275.2
CAFS_HM_T_00069903	7655.3	7470.8	7602.9	8116.4	8057.4	7793.9	8795.6	8402.6	8418.6
CAFS_HM_T_00016898	38082.5	38575.9	39575.6	45831.6	40640.6	44900.7	45540.1	44028.6	46772.3
CAFS_HM_T_00020688	22407.2	22008.7	23039.4	23513.9	22964.1	24055.4	24292	24665	24315
CAFS_HM_T_00018962	22678.9	22507.4	23196.9	24799.1	24578.9	25526.1	26534.3	26036.7	26123.1
CAFS_HM_T_00091029	27400.5	26735.5	28140.8	31754.1	31281.4	33599.8	33791.8	33013.9	33805.9
CAFS_HM_T_00077351	17967	18118.6	18350.2	18933.4	18949.2	20083.9	20529.2	20374.2	20399.6
CAFS_HM_T_00008668	1303.6	1320.8	1372.5	1434.6	1507.6	1488.6	1421.8	1557.3	1533.8
CAFS_HM_T_00069913	2013.3	1988.4	2160.3	2092.5	2056.5	2194.6	2245.3	2207	2233.3
CAFS_HM_T_00068886	12228.3	12122.8	12355.6	13954.4	13608.1	14260.6	14659.6	14214.8	14183.5
CAFS_HM_T_00008672	1133.2	1092	1097.1	1140.2	1172.7	1165.8	1020.4	1078.6	1055.6
CAFS_HM_T_00007003	22099.4	21586.7	22324.9	22274.5	21473.9	22763.2	21954.1	22464.1	22860.6
CAFS_HM_T_00038448	15825.5	15988.9	16213.6	16444.9	16813.4	16735.7	17418.3	17567.2	17560.4
CAFS_HM_T_00001240	1337.4	1314.5	1386.5	1387.5	1417.7	1612.2	1463.1	1348.7	1518.3
CAFS_HM_T_00086417	1262.7	1294.8	1281.8	1391.6	1276.5	1358.3	1297.8	1289.3	1302.9
CAFS_HM_T_00066950	24607.8	24277	25210.4	23965.4	23908	25082.6	25691.5	24814.9	26156.4
CAFS_HM_T_00087005	15765.6	15496.4	16416.1	15767.8	16120.6	16635.9	16480.1	16100.9	16411.1
CAFS_HM_T_00058021	13721.7	13698.2	13725.4	13722.7	13320.8	13722.3	13854.9	14030.7	13887.7
CAFS_HM_T_00025415	31968.6	31774.3	33245.8	32434.1	31972.1	34022.3	37123.7	35132.2	36901.1
CAFS_HM_T_00053889	20745	20916.7	21231.4	21340.1	20735.2	21770	21812.4	21127.7	22001.5
CAFS_HM_T_00059889	23121.5	23439.2	23309.5	25365.3	23969.7	25293.8	25420	24706.6	25753
CAFS_HM_T_00073885	34037.2	36015.2	34874.4	40660.9	35973.7	37555.8	40103.2	39761.6	41575.8
CAFS_HM_T_00056851	14483.8	14255.6	14674.7	14873	15102	15560.3	15078.6	15129.2	15203.4
CAFS_HM_T_00005153	20367.1	20234.6	20466.4	21775.5	21204.9	22707	23865.1	24569.9	23435.4
CAFS_HM_T_00071979	7015.6	7134.6	7153.9	7494.2	7533.7	8189.5	9105.8	8981.5	9060.1
CAFS_HM_T_00037723	26807	27001.4	27277	30195.7	28582.8	30371.2	29442.1	27622.8	29088.9
CAFS_HM_T_00040139	16729.7	16933.4	17720.5	17816.4	17606.3	18639.6	17278.3	16663.1	16963
CAFS_HM_T_00001368	19891.9	20074.4	21176.7	22814.8	21788.9	23267.7	25656.8	24127.7	25075.1
CAFS_HM_T_00062807	28356.7	29312.2	28064.7	30290.5	28828.5	29756	31646.5	30624.1	31369.6
CAFS_HM_T_00058972	22817.5	22586.3	23009	23637.3	23084	24022.4	24416	23754.9	24445.8
CAFS_HM_T_00021537	42012.9	45166.4	44267.9	50537.4	43802.6	48118.7	48800.7	46376.7	49789.9
CAFS_HM_T_00070529	15691.8	15873.3	16190.4	17394.1	16262.8	17779.8	17505.5	16983.5	17574.4
CAFS_HM_T_00090940	15694.9	15335.3	15844.2	16048.6	15665.7	16175.9	16489.2	16203.5	16367.9
CAFS_HM_T_00051391	26095.5	26505.7	27065.7	27704.4	27305.1	28806.3	29138.9	29573.6	29773.1
CAFS_HM_T_00028012	16315.4	16176	16458.1	17305.8	16546.4	17102.5	17619.8	16572	17473
CAFS_HM_T_00008690	18387.1	17788.4	18569.6	20088.4	19421.3	20870.8	20748.5	20613.4	21256.3
CAFS_HM_T_00024150	17347.9	17287.6	17206.8	17614.7	17692.7	18157.6	17830.8	18381.9	17787.3
CAFS_HM_T_00017823	21205.4	21394.6	22205.3	23325.6	22560.1	23878.2	25221.2	24909.2	25817.2
CAFS_HM_T_00056689	12637.5	12525	12496.7	13013.7	13132.9	13086.5	13305.6	13248.7	13268.6
CAFS_HM_T_00060981	21728.1	21935.2	22745	23464.9	22214	23896.2	23706.9	22976.4	24165.4
CAFS_HM_T_00062164	12179.7	12222.8	12394.1	13200.6	12325.7	13185.8	13916.8	13736.6	14021.1
CAFS_HM_T_00057299	12606.1	12595.6	12507.2	12788.1	13117.8	12729	12826	12716.6	12638
CAFS_HM_T_00015632	11302.9	11476.9	11747.5	10437.3	9439.4	10404.5	9351.3	9093.6	9092.4
CAFS_HM_T_00073307	12511.4	12497	12786.5	13691.6	13083.5	14042.2	14068.1	13595.8	13777.4
CAFS_HM_T_00065957	9603.7	9438.8	9954.3	9750.2	9828	10255.5	10193.5	10315.3	10367.4
CAFS_HM_T_00067579	714.1	658.5	658.2	683.1	895.9	897.9	5923	4604.8	2289.1
CAFS_HM_T_00076966	14266.2	13868.2	14331.2	14522.3	14379	14857.4	15677.7	15573.9	15988.5
CAFS_HM_T_00004550	14546	14241.4	14849.6	15212.2	14346.2	15653.1	16288.9	16299	16590
CAFS_HM_T_00069911	823.6	770.1	864.8	773.2	865.6	910.3	931.2	962.4	947.7
CAFS_HM_T_00013725	17348.3	17443.5	18060	17726.3	17568.8	18467.3	19836.1	19746.8	20438.3
CAFS_HM_T_00052961	15030.7	15174.4	14763.8	13855.4	14112.6	12816.7	11909	12103.7	11820
CAFS_HM_T_00069365	26252.9	25963.7	27384.2	26335.7	25797.2	27486.7	28766.8	28875.3	28882.2
CAFS_HM_T_00069909	4776.2	4597.4	5045.8	5184.2	5259.4	5517.5	5843.8	5575.4	5848.3
CAFS_HM_T_00091877	10967.3	10886.6	10839.7	10642.8	10933.5	10840.3	11256.8	10912	11366.5
CAFS_HM_T_00073631	17103.6	17332.6	17528	16814	16513	15830.9	15139.1	14656.7	15027.7
CAFS_HM_T_00031810	10136.6	10435.6	10570.7	12295.8	10989.1	11981.1	11739	11450.6	11908.1
CAFS_HM_T_00067042	40691.4	43758.7	41979.2	46984.1	40944.7	43745.3	46238.1	44989.2	47041
CAFS_HM_T_00031182	21965.8	22904.2	19169.1	11948.1	15343.1	8659	7345	7179.5	7023.3
CAFS_HM_T_00088194	7890.1	7884.2	7776.3	8194.3	8186.9	8330.9	8312.9	8045.6	8142.6
CAFS_HM_T_00068655	10413.1	10112.7	10500.3	9967.9	10231.9	10222	10787.7	10924.5	11100.3
CAFS_HM_T_00041145	8679	8487.2	8747.1	9313.7	9147.1	9364.7	9741.4	9650.9	10072.1
CAFS_HM_T_00053890	11200.4	10960.6	11299.4	11264.4	11355.8	12132.9	12279.2	13006.1	11790.4
CAFS_HM_T_00031096	13483.9	13561.2	13544.4	14386.6	14274.5	14568.6	13740.1	13966.8	13779.4
CAFS_HM_T_00076215	10931.4	10825.8	11156.2	10987.5	10347.7	10733.1	10441.4	10747.4	10898.4
CAFS_HM_T_00008248	12101.5	12006	12213.4	12494.8	12536	12953.4	13269.5	13121.3	13408.7
CAFS_HM_T_00078205	10893.9	10792	11078.5	11194.5	10962.3	11272.5	11956.4	11813.4	11928.3
CAFS_HM_T_00028830	15971.7	16153.5	15758.1	15609.3	15345.5	14700.1	13757.2	14403.5	13865.8
CAFS_HM_T_00092258	13693.5	13549.4	14149.4	14104	14060.2	14827.5	15194.4	15264.9	15371.5
CAFS_HM_T_00083690	14052.1	13604	13987.7	13505.2	14129.1	14777.7	13839.7	13680.2	14444
CAFS_HM_T_00016955	36151.7	35615.9	37874.5	36107.8	35035	37902.3	38913.8	38124.7	39409.8
CAFS_HM_T_00032924	9776.4	9807.9	9862.2	9771.2	10113.4	10035.9	10609.7	10211.8	10399
CAFS_HM_T_00074112	10575.6	10263.1	10973.5	10562.9	10304.5	11232.7	12296.2	11758.8	12828.1
CAFS_HM_T_00089476	12653.1	12344.7	12713.5	12235.3	11653.8	12458.2	11846.5	11713.4	11733.8
CAFS_HM_T_00067593	171.5	151.2	179.7	165.6	197.9	211.2	781.8	698.1	390.3
CAFS_HM_T_00036477	36507.6	37981.9	37421.7	42084.2	38989.5	40498.4	41116.1	40100.4	43219.1
CAFS_HM_T_00090889	9328.4	9015.3	9080.7	9798.1	9329.1	9889.7	9247.5	9391.8	9369.7
CAFS_HM_T_00045305	12245.1	12117.4	12212.6	12527.9	12787.5	13177.5	13793.4	14088.7	14636.8
CAFS_HM_T_00037540	11626.5	11335.8	11324	11423.8	11578.7	11650	11967.9	12082.6	11854.9
CAFS_HM_T_00054669	17365	17224.7	17659.7	18504.1	17951.1	18640.7	18905.2	19103	19227.6
CAFS_HM_T_00071211	10634.7	10522.2	10611.8	10810.6	10657.6	10002.2	10246.3	10673.6	10421.1
CAFS_HM_T_00065717	17956.9	18597.8	18334.7	20994.1	18642.1	20089.4	20382.8	20157.1	20837
CAFS_HM_T_00085816	2955.7	2995.7	3051.5	3260.1	2960.5	3142	3137.4	3166.5	3248.4
CAFS_HM_T_00043005	11654.7	11934.7	11242.8	10347.2	11317.1	9366.6	8159.2	8476.2	7871.9
CAFS_HM_T_00075861	12229	12142.9	12204.8	12427.9	12656.8	12698.2	13198.8	13290.6	13178.6
CAFS_HM_T_00057224	26832.8	26587.6	26943.6	26415.9	26836.5	25806.5	22789.2	22713.5	21950.6
CAFS_HM_T_00020610	7010.9	6998.5	6641.8	5077.6	7488.2	3661.5	2594.5	2495.2	2359.9
CAFS_HM_T_00088307	4625.2	4588.5	4803.6	4721.3	4475.9	4453.6	4250.7	4271	4137.4
CAFS_HM_T_00063291	15532.2	15512.5	16016.2	15282.1	15195.1	15551.9	15634.6	15264.3	15470.1
CAFS_HM_T_00071148	5953.4	6017.4	5737	4992.6	6049.2	4902	4746.4	4729.7	4717.9
CAFS_HM_T_00052531	19414.3	18765.3	19112.2	19077.4	19001.3	19237.5	19764.2	19636.2	19647.9
CAFS_HM_T_00081275	12771.3	12617.1	12721.1	12811.1	13299	13345.5	13842.6	13587.9	13528.2
CAFS_HM_T_00035112	16009.9	15636.9	16452.4	17752.5	17783.8	18575.1	19101.8	18639.4	19054.8
CAFS_HM_T_00063618	24958.8	25252.7	25506.9	24955.4	23292.4	24343.1	26135	25342.2	26315.2
CAFS_HM_T_00010012	10439.8	10424.3	10713.2	10810.3	10683.1	10982.8	11502.1	11636.5	11807.5
CAFS_HM_T_00052088	5514.7	5411.1	5461.3	5419.3	5793.9	5764.3	5898.2	5714	5791.9
CAFS_HM_T_00038735	13353.7	13501	13206.5	13080.8	13505	13295.8	13685.2	13708.1	13696.5
CAFS_HM_T_00061120	21435.7	21245	22214.9	22218.2	20715.2	22741.9	25881.1	24807.2	25722.3
CAFS_HM_T_00085804	27176.4	27515.4	29599.9	30433.4	30464.6	31162.3	30538.5	29087.6	29722.4
CAFS_HM_T_00088295	3231	3174.3	3234.3	3261.1	3055.5	3073.2	2998.5	2973	2824.7
CAFS_HM_T_00046525	15195.2	15056.3	15253.5	14953.5	14867.5	15004.7	14880.4	14438.4	14610.4
CAFS_HM_T_00085817	2868.3	2794.3	2838	3147.6	2971.4	3348.7	3208.8	3317.3	3418.5
CAFS_HM_T_00058936	24618.6	25091.3	24726	25454.9	25916.7	24352.9	21452.4	21251.1	20522
CAFS_HM_T_00031519	9060.4	9089.6	8921.9	9422.1	9563	9978.3	10189.6	9897.2	10152.5
CAFS_HM_T_00028841	16409.3	16515	16543.1	16749	16558.9	16295.4	13594.4	14067.9	13440
CAFS_HM_T_00051948	18199.7	18222.5	18556.5	19044.1	18215.1	19259.8	18968.7	18879.8	19235.2
CAFS_HM_T_00005387	8757.2	8754.1	9073.8	8487.3	8313.4	8397.1	9155.1	9372.2	9092.1
CAFS_HM_T_00018974	9250.8	9141.2	9445.6	9692.6	9676.8	10242.3	10121.9	9816.2	10403
CAFS_HM_T_00088555	13051.6	13182.4	12879.5	12902.5	13136.2	13061.6	13242.3	13355.7	13133.9
CAFS_HM_T_00024417	15270.5	15189.8	15492.7	14853.3	14349.1	15238.8	15823.2	15494.2	16153.3
CAFS_HM_T_00074967	12040.4	11837.8	12108.3	12113.3	12153	12581.7	13612.2	13546.8	13568
CAFS_HM_T_00073537	9002.5	8898.7	9361	9982.9	10236.5	10645.8	10615.2	10141.2	10545.2
CAFS_HM_T_00078997	19356.5	19769.5	19893.1	20546.8	19797	21208.2	21440.8	20946.3	21436.4
CAFS_HM_T_00052299	10369.5	10196.4	10855.8	10557.2	9800.2	10613	11252.4	11379.4	11887.5
CAFS_HM_T_00022076	12125.8	11994	11885.9	12398.9	12347.3	12502.3	12616.8	12566.5	12576.6
CAFS_HM_T_00017666	9350.7	9424.8	9611.9	10222.7	10540	11127.7	11210.4	11073.5	11156.1
CAFS_HM_T_00062655	7566.9	7416	7628.5	7914.6	7594.1	8131.5	8326.9	8029.2	8210.6
CAFS_HM_T_00084393	5746.8	5824.5	5906.8	6393.3	6066.7	6345.9	6547.4	6524.6	6563.1
CAFS_HM_T_00073772	16847.9	16660	17127	17733.4	17726.3	18337.4	19135.1	18460.7	18827.2
CAFS_HM_T_00053004	10686.6	10327.3	10615.1	10986.6	11193	11408.8	10648.4	10796.6	10540.4
CAFS_HM_T_00092009	15219.8	15091.8	14926.3	12949.8	12016.9	12350.9	14334.1	14332.3	14390.3
CAFS_HM_T_00033005	9358.1	9172.5	9377.9	10054.7	9854.4	10363	9542.5	9582.3	9243.8
CAFS_HM_T_00013083	17700	17348.6	18153.1	18262.2	18024	19363.2	19222.9	19176.8	19659.9
CAFS_HM_T_00015429	9430.5	9137.2	9389.2	9924.3	9778.5	10298.9	10885.8	11135.7	11056.6
CAFS_HM_T_00051701	13955.4	13638.6	13935.3	13636.4	13604.2	14004.1	14245.2	13896.9	14347.5
CAFS_HM_T_00082797	9816.9	9988.9	10220.5	10089.8	9657	10419.6	8478.5	7670.6	8146.2
CAFS_HM_T_00026478	11901.5	11569.2	12086.5	12219.1	12214.6	12670.5	12790.5	12498.3	12963.4
CAFS_HM_T_00019121	14539.2	14895.2	15023.1	16253	15617.8	16353.9	16170.1	15755.7	16392
CAFS_HM_T_00051204	8169.9	7925.9	7970.3	8332.1	8242.1	8461.3	8727.6	8793.1	8951.2
CAFS_HM_T_00090923	7855.6	8000.8	7865.8	8591.6	8434.1	8603.9	8873.7	9072.7	8884.9
CAFS_HM_T_00004827	18823.2	18607.8	19134.4	18741.3	17933.8	18698.2	19177.7	19025.1	19131.2
CAFS_HM_T_00071989	2112	2216.6	2228.4	2480.5	2342.8	2605.4	2717.7	2739.3	2697.5
CAFS_HM_T_00043643	6962.2	6927	7033.2	6935.9	6881.4	7207.3	7677.1	7289.2	7656.3
CAFS_HM_T_00048267	9533.1	9492.3	9658.7	10254	10139.6	10568	11427.4	11458.1	11599.3
CAFS_HM_T_00047396	8211.2	8214.4	8171	8839	8344.2	8675.9	8606.4	8733.9	8704
CAFS_HM_T_00009042	11078.5	10777.7	11301.1	10976.4	10140.1	11047.3	11186.2	10899.4	11182.1
CAFS_HM_T_00043946	2767.7	2923.1	2712.1	2006.3	2493.9	1653.9	1461	1412.8	1375.6
CAFS_HM_T_00073708	10454.6	10279.9	10626.8	12852.9	12524.6	12665.7	14755.4	14761.9	14573.5
CAFS_HM_T_00042658	9075.5	9011.2	9386	9598.7	9657.6	10621.6	10993.7	11167.5	11118.4
CAFS_HM_T_00039192	6138.7	6096.5	5928.1	5934.7	5951.8	5861.1	5776.9	5819.4	5795.5
CAFS_HM_T_00018426	28024.1	29072.4	28211.8	32711.6	29041.6	31425.6	30027.1	29528.2	30861.9
CAFS_HM_T_00047885	16178	16164	16021.5	17312.3	16965.7	17601.9	17189.8	16948.2	16884.7
CAFS_HM_T_00055842	12059.1	11936.7	12480.8	12101.1	12401.1	13084	13483	13293.5	13552.1
CAFS_HM_T_00062658	10246.5	9936.8	10497.6	10418	10658.2	11363	11406.6	11170.2	11538.8
CAFS_HM_T_00033330	12279.8	12165.5	12564.4	12623.9	12300.4	13241.7	13486.2	12736.7	13352.3
CAFS_HM_T_00006740	14220.4	13789.7	14396.4	13899.1	13710.4	14291.9	14119.8	13823	14131.5
CAFS_HM_T_00016252	5764.8	5627.3	5753.6	5952	5972	6211.3	6444	6233.3	6413.4
CAFS_HM_T_00042004	11380.6	11131.4	11239.8	10720.6	10955.6	11205.9	10875.5	11058.5	11207.5
CAFS_HM_T_00090643	10251.4	10407.7	10101.4	9685.7	10212.6	9689.8	9151.1	9435	9254.4
CAFS_HM_T_00034403	13282.8	13060.6	14062	13611.4	13891.6	14402.2	14039.9	13359.7	14343.4
CAFS_HM_T_00078136	12268.8	12355.5	12187	13273.4	12489.2	12184	11316.5	11706.8	11424.8
CAFS_HM_T_00084314	13972.1	14714.6	16499	16282.2	16654.3	17873	16419	15263.4	17029.9
CAFS_HM_T_00018279	7411.8	7413.9	7430.9	7558.9	7567.4	7721.2	7612.8	7661.6	7834.7
CAFS_HM_T_00069897	2031.5	2079.8	2212	2086.4	2121.8	2374.2	2152	2064	2239.5
CAFS_HM_T_00076336	8959.2	9079.1	9119.1	9781.8	8960	9211.2	9534.4	9678.8	9507.3
CAFS_HM_T_00026326	6977.8	6924.7	6978.7	7315.9	7063.5	7411.3	7547.6	7344.5	7546.2
CAFS_HM_T_00072318	9234.2	9229.6	9175.3	9744.8	9706.2	9995.7	11481.1	10701.9	11231
CAFS_HM_T_00065374	5648.7	5617	5673.5	5706.7	5762.8	5929.3	6014.3	6023.1	5920.3
CAFS_HM_T_00019377	11332.2	11307.4	11160.5	12177.7	11882.1	12214.6	12794.8	12661.2	12754
CAFS_HM_T_00009337	6580.7	6359.7	6360.7	6315.3	6605.7	6445	6517.2	6387.2	6476.3
CAFS_HM_T_00064350	14812	15080.4	14893.1	16930.8	16395.8	17073.4	17548.6	16346.5	17176.6
CAFS_HM_T_00080753	7644.2	7710.3	6982.2	5147.6	6437.7	3748.6	3033.6	3036.5	2900.9
CAFS_HM_T_00016361	16367.3	17210.9	14929.3	9211.4	17716.5	6305	4457.9	3951.7	3765.4
CAFS_HM_T_00018973	10763.5	10691.1	10914	11598.2	11119.5	11690.6	12583.3	12360.9	12504.4
CAFS_HM_T_00085985	7479.2	7535.9	7563.2	7938.2	7597	8296.4	8451.9	8696.9	8388.1
CAFS_HM_T_00045889	6230.5	6237.2	6391	6287.9	6172.4	6404.3	6538.9	6426.6	6450
CAFS_HM_T_00021153	9982.8	10045.6	9828.6	10230.9	10101.4	10132.5	10353.9	10624.6	10401.6
CAFS_HM_T_00071627	11121.1	11577.4	11354.1	12426.2	11422.8	12285.6	12327.4	12233.2	12734.8
CAFS_HM_T_00071994	3723.1	3689	3743.3	4041.6	3784.8	4086.7	4405.9	4686.9	4683.5
CAFS_HM_T_00024296	13819.1	13693.7	14262.4	14734	14229	14875.1	15218.4	14999	15235.3
CAFS_HM_T_00054151	85.4	84.2	85.6	97.4	86.2	103.2	109.2	86.1	96.1
CAFS_HM_T_00081042	14415.5	14572.6	15517.9	14483.9	14164.3	14426.9	12807.8	13337.3	13012.5
CAFS_HM_T_00053808	9186.7	9074.6	9063.1	9335.7	9238.1	9453.8	9692.2	9696.5	9876.1
CAFS_HM_T_00037188	8042.2	7979.6	8438.3	8910.4	8546.8	9290.5	9509.8	9129.6	9829.4
CAFS_HM_T_00050564	8283.7	8141	8270.7	8602.2	8631.2	8573.4	8111.8	8068.2	7834.2
CAFS_HM_T_00011045	10863.2	10819.2	10695.2	9822.6	9519.6	9842.5	10344.9	9432.5	10121.1
CAFS_HM_T_00071811	12397.2	11916.2	12461.9	13920.5	13341.3	13833.7	15132	14922.6	14836.9
CAFS_HM_T_00073543	2646.6	2519.7	2564.6	2589.4	2539.7	2509	2775.4	2398.7	2513.2
CAFS_HM_T_00082643	9708	9314.7	9896.7	9877.2	9823.8	10343.7	9932.6	9894.7	10164.8
CAFS_HM_T_00053257	14019	14170.9	13392.6	10386.9	12328.3	8563.7	7304.2	7503.3	7282.4
CAFS_HM_T_00024851	4720.9	4611.3	4771.9	4708.4	4862	4750.5	5794.7	5651.7	5504.7
CAFS_HM_T_00043863	8742.7	8500.7	8756.4	8504.8	8850.3	8799.6	8189.4	8133.4	8301.3
CAFS_HM_T_00043112	7781.7	7697.5	7820.2	7401.6	7598.6	7758.5	8158.9	8122.2	8253.9
CAFS_HM_T_00063233	11485.8	11274.5	11597.1	11820.4	11790.6	12454.7	12470.9	11923.8	12135.7
CAFS_HM_T_00024458	9591.4	9305.1	9419.9	10563	10262.9	11000.1	10861.3	10909.4	11029.1
CAFS_HM_T_00025682	7404.4	7338.5	7547.4	7477.5	7441.1	7648.2	7741.9	7800	7781.8
CAFS_HM_T_00078102	9233.1	9027.4	8935.2	9194.7	9148.2	9383.1	9459.7	9509.3	9352.9
CAFS_HM_T_00050263	15160.3	15184.2	15444.3	16078.8	14975.2	16020.3	15608.4	15066	16356.5
CAFS_HM_T_00004622	9013.4	9078.8	9000.1	8859	9103	9028.3	8707.9	8801.4	8646.9
CAFS_HM_T_00023279	11009.3	10989.3	10949.1	10995.8	10588.1	11635	12436	12329.9	10364.4
CAFS_HM_T_00090821	7340.2	7253.5	7432.2	8033	8107.9	8628.6	8232.5	8368.2	8363.3
CAFS_HM_T_00008117	8472	8386.1	8618.4	8571.6	8709.2	8894.3	9345.8	9220.2	9163.8
CAFS_HM_T_00073250	10839.1	10788.2	10615.6	11252.9	10690.4	10892.1	11272.1	11321.8	11197.4
CAFS_HM_T_00021106	4422.3	4270.6	4394.2	4043.6	4052.8	4277.7	4545.9	4660.5	4776
CAFS_HM_T_00082667	6796.7	6652.4	6644.6	6659.7	6595.2	6702.9	6762.7	6731.6	6924.7
CAFS_HM_T_00000561	91.4	87.8	115.8	82.4	86.1	93.1	98.1	73.7	97.9
CAFS_HM_T_00051706	7249.9	7151	7136.8	7141.8	7039.6	7229.5	7450.2	7023.4	7339.6
CAFS_HM_T_00066554	2953.7	2912.2	2948.3	2899.9	2909.4	2857.3	2815.6	2776.6	2815
CAFS_HM_T_00073577	6515.7	6415.5	6380.2	6811.4	6678.4	7080	7517.5	7349.8	7490.9
CAFS_HM_T_00019974	13229.3	12807.2	13057.9	12466.9	12241.5	12536.2	13545.4	13371.3	13743.4
CAFS_HM_T_00048411	6911.6	6757	6770.9	7595.8	7678.2	8006.2	7641.7	7375.3	7339.6
CAFS_HM_T_00040353	12072.2	11684.5	12468.4	12617.6	12244.9	13378.2	13477.7	13312.7	13734.2
CAFS_HM_T_00045080	9774	9685.2	9761	10492	10320.9	11157.6	11300.2	11066.6	11702
CAFS_HM_T_00079514	752.6	779.3	769.9	777.1	755	782.1	751.8	729.3	750.8
CAFS_HM_T_00038791	2306.5	2404.7	2334.1	2131.7	2214.1	2131.6	2094.3	2022.8	2081.5
CAFS_HM_T_00058095	12692.5	13191.8	12152.6	10590.5	11198.4	9041.6	8206.5	8322.1	7921.1
CAFS_HM_T_00036429	9288.8	9246.7	9502.6	9162.6	9126.8	9529.2	9092.6	9361.2	9562.7
CAFS_HM_T_00071147	5009.5	4722.1	4026.2	2392.9	3113.8	2106.7	1915.1	2003.9	1895.9
CAFS_HM_T_00023031	9957	9868.3	10034.6	10081.8	10019.8	10243.7	10727.8	10814.1	10903.4
CAFS_HM_T_00084162	5617	5490.4	5643.2	5753.5	5893.9	5908.9	6071.3	5968.8	6104.9
CAFS_HM_T_00001863	6161.5	5947.2	5837.3	5700.2	6032.4	6095.7	6213.4	6171	5790.8
CAFS_HM_T_00006831	6344.7	6258.4	6597.9	7540.4	7142.6	7783.6	7714	7542.6	7369.1
CAFS_HM_T_00048658	5983.5	5954.7	5891.2	6520.1	6404.5	6850.7	6672.4	6502.7	6699.5
CAFS_HM_T_00058384	10796.9	10833.7	11091.7	11377.1	11363.5	12349.9	11994.1	11949.8	12028.2
CAFS_HM_T_00079515	163.9	170	168.9	158.1	159.4	149.6	129	127.3	140.8
CAFS_HM_T_00037464	16529.2	16851.2	16745.6	15975.3	15768.5	14026.1	12210.1	12568.7	11966.1
CAFS_HM_T_00068438	5618.6	5594.2	5729.7	5422.8	5450	5797	5852.8	6072.5	5924.6
CAFS_HM_T_00057653	266.1	263.7	286.7	254.5	259.6	249.8	230.1	223.1	232.6
CAFS_HM_T_00054411	9251.2	9026.4	9337	9816.4	9628.4	9982.6	10013.2	10120.1	10219
CAFS_HM_T_00016847	6699.2	6694.8	6598	6545.7	6540.8	6565.4	6635.8	6778	6670.8
CAFS_HM_T_00023593	4212.4	4526.8	3945.8	2432	2876.8	1828.6	1690.6	1706.4	1636
CAFS_HM_T_00089108	7227.5	7166.1	7233.7	7342.1	7504.2	7440.4	7616	7545.3	7687.5
CAFS_HM_T_00083381	10046.7	9868.3	10230	10572.3	10413.6	11180	11678.2	11315.7	11928.7
CAFS_HM_T_00091832	4779.9	4611.8	4731.3	4739.2	4780.3	5037.8	5286.3	5280.9	5391.2
CAFS_HM_T_00066674	4385	4347.6	4383.3	4297.8	4317.2	4345.3	4325.4	4326.9	4407.2
CAFS_HM_T_00054471	4518.1	4480.3	4537.2	4859.7	4752.1	5106.7	4906.2	4703.2	4893.8
CAFS_HM_T_00069939	2366.8	2352.6	2400.6	2723.7	2620.6	2662.1	2928.7	3029.2	2981.3
CAFS_HM_T_00073187	6463	6382.9	6899	6955.2	6944.4	7301.6	7334.2	7142.2	7486.9
CAFS_HM_T_00047991	6513.6	6516.6	6463.1	6478.1	6635.1	6546.2	6289.9	6374.9	6383.9
CAFS_HM_T_00061163	10995.7	10818.4	10978.7	11019.3	10999.1	11176.2	11255.7	11402.5	11317
CAFS_HM_T_00061077	7903.3	7818.9	8056.6	7965.9	7722.4	8175.7	8461.2	8650.6	8584.1
CAFS_HM_T_00063958	27.1	28.5	28	34.6	32.6	30.5	66.6	62.3	36.5
CAFS_HM_T_00059705	1723.3	1738.1	1655.5	1750.1	1733	1752	1826.7	1812.7	1753.5
CAFS_HM_T_00003217	3065.3	3152.6	3113	3264.7	3144.8	3138.7	3052.4	3093.3	3122.8
CAFS_HM_T_00007376	9973.3	9814.2	10043.1	10140	10252.9	10266.5	10401.9	10654.9	10523.2
CAFS_HM_T_00016137	2275.6	2221.8	2311	2212.3	2378.5	2301.6	2115.4	2158.6	2213.1
CAFS_HM_T_00041092	914.5	897	944.2	872.9	876.2	885.3	865.3	833.6	927
CAFS_HM_T_00035230	11089.5	11236.3	11375.9	10820.5	11146.6	11067.3	10953	10847.2	11056.8
CAFS_HM_T_00037959	8697.6	8461.5	9187.8	8788.5	8746.6	9721	10119.5	9892	10239.3
CAFS_HM_T_00043029	6069.8	6126.6	6101.6	6538.6	6344.4	6927	6642.1	6595.4	6729.9
CAFS_HM_T_00058811	9119.2	9098.6	9153.7	8985.3	8209.4	8570.5	9061.6	8592	8878.2
CAFS_HM_T_00035464	8154.3	7980.9	8168.6	8411.1	8531	8801.5	8423.2	8500.1	8535.6
CAFS_HM_T_00009918	11025.9	10567.8	10841.5	11051.2	10757.7	11220.9	12174.2	11452	12175.8
CAFS_HM_T_00011001	10684.3	10974.2	10627.5	9959.4	10190.1	8740.1	8307.7	8631.5	8294.6
CAFS_HM_T_00090703	8610.2	8414.9	8389.5	8279	8372.4	8401.1	9090.5	8720.5	8839.9
CAFS_HM_T_00054819	1079.8	1087.3	1088.4	1207.8	1158.9	1236.1	1340.3	1284.9	1301
CAFS_HM_T_00087431	3078.6	3152.5	3097.9	3098.7	3216.5	3210.7	3321.9	3187.6	3308.5
CAFS_HM_T_00091656	7734.8	7722.2	8102.3	8359.9	8147.9	8770.7	8462.5	8232.2	8516.5
CAFS_HM_T_00075276	13423.4	13818	13863.6	13808.4	13395.8	14318.7	14578.9	14939.1	15039.8
CAFS_HM_T_00038325	9626.9	9330	9466.3	9561	9494.9	9810.1	10730.5	10577.7	10759
CAFS_HM_T_00060807	5414.8	5444.2	5663.7	5659.5	5313.5	5339.4	5719.1	5601.7	5712.4
CAFS_HM_T_00032556	15000.9	14689.4	15243.5	14451.4	14262.1	15586.3	16751.6	16802.2	16874.4
CAFS_HM_T_00063415	11252.7	10951.4	11320.2	11554.1	11588.7	12134.4	12924.7	12871.8	12880.5
CAFS_HM_T_00018469	5217.6	5220.3	5266.8	5052.1	4989.8	5196.4	4577.4	4835.4	4697.8
CAFS_HM_T_00066767	4394.7	4373.4	4559.1	4519.6	4517.1	4759.5	4680.5	4702.3	4772.1
CAFS_HM_T_00077079	6076	5988	6055.3	5994.7	5825.2	5969.7	6003.3	5947.4	5916
CAFS_HM_T_00063535	7746.8	7495.7	7651.9	7817.6	7781.5	7855	7944.5	7890.7	7751.4
CAFS_HM_T_00018776	8704.8	8556.6	8724.9	9164.7	9280.4	9514.3	9663.5	9643.9	9564.7
CAFS_HM_T_00004909	23868	24629.2	23935.3	26593.4	24060.9	25111.2	25411.4	24976.5	25002.9
CAFS_HM_T_00020983	4966.9	5171	4420.7	2885.5	4901.9	2363.5	1794.1	1776.9	1660.1
CAFS_HM_T_00067933	799.5	785.2	812.3	818.1	791.3	788.3	752	782.1	793.1
CAFS_HM_T_00090964	6874.1	6757.5	6851.7	6806.8	6805.7	6987.9	7502	7519.7	7683.3
CAFS_HM_T_00072413	5115.8	5052.9	4865.7	4913	5038.1	4855.6	4956.5	4956.2	4877.7
CAFS_HM_T_00071325	9896	9650.6	10064.5	11663.7	11328.7	11472.9	13014.5	12844.6	12730
CAFS_HM_T_00058233	11460.7	11686.3	11763	12153.6	11584.5	11943	12679.6	12028.2	12444.8
CAFS_HM_T_00066340	10227.6	9971	9960.2	10431.7	10078.9	10111.5	11980.3	11372.5	11440.9
CAFS_HM_T_00069920	4866.3	4713.2	4765.4	4489.7	4289.7	4438.4	4517.1	4531.2	4512
CAFS_HM_T_00025324	8183.2	7988.4	8231.1	8172.4	8292.9	8463	8438.8	8421.7	8614.9
CAFS_HM_T_00075094	6454.3	6329.7	6638.6	6893	6989.2	7512.3	7285.6	7279.4	7380.4
CAFS_HM_T_00036291	6130.7	6013.3	6200.2	6127.9	6240.6	6342.6	6245.6	6614.5	6221.8
CAFS_HM_T_00014583	39376.6	41520.9	43289.2	46127.4	41256.1	44539.9	51221.4	48750.1	52532.2
CAFS_HM_T_00053251	11110.9	11377.9	10569.2	8295	9736.1	6398.6	5307.7	5445.2	5169.4
CAFS_HM_T_00078424	8630.1	8482.6	8555.2	8808	8758.9	9075.8	10166	9631.8	10021
CAFS_HM_T_00054004	8998.8	9012.6	8989.9	9152.4	8876.7	9293.2	9679.6	10118.3	9963.4
CAFS_HM_T_00082455	5366.7	5437.8	5503.2	5460.5	5453.6	5564.6	5501.9	5483.9	5437.9
CAFS_HM_T_00026431	6974.5	6982.1	6951.6	7101.5	7182.2	7154.7	7016	7226	7252.2
CAFS_HM_T_00013870	5805.7	5650.9	5832.1	6206.8	6314.4	6511.6	6850.4	6770.8	6952.7
CAFS_HM_T_00081769	11579	11512.4	11364.9	11600.4	11792.2	11653.3	12382.2	12235.8	12172.5
CAFS_HM_T_00080541	8162.1	8117.2	8215.6	9136.4	8437.9	8781	8828.4	8821.8	8730.9
CAFS_HM_T_00006701	8087.9	7734.2	7985.7	8164	7879.5	8199.9	8070.1	8254.9	7873
CAFS_HM_T_00011742	5167.1	5147.5	5189.5	5236.1	5409.8	5684.5	5740.1	5619.2	5658.2
CAFS_HM_T_00041962	7940.6	7959.2	8041.6	7947.5	8233.5	8203.7	8193.9	8077.3	8359.2
CAFS_HM_T_00071732	6593.8	6408.5	6655.8	6607.4	6822.1	6787.7	6924.7	7013.3	6967.1
CAFS_HM_T_00035633	3316.9	3291.3	3415.5	3249.5	3436.2	3445.5	3597.4	3483.1	3564
CAFS_HM_T_00090227	5162.9	5126.3	5051.1	5406.9	5352.6	5554.6	5482.6	5491	5460.4
CAFS_HM_T_00004034	6679	6702.3	6881.1	4477.3	4048	3849.6	3832.1	4101	4267
CAFS_HM_T_00026363	12469.1	12132.4	12510.1	12621.1	12383.3	12840.1	12832.4	12807.1	13045.6
CAFS_HM_T_00088582	12883.2	12565.8	12880.6	12511.9	12502.4	13329.9	14322.6	14636.4	14619.3
CAFS_HM_T_00048160	6470.1	6476.9	6399.1	5770.2	6091.4	5474.6	4830.3	4912.1	4756.4
CAFS_HM_T_00022081	7417.6	7330.4	7552.5	7866.7	7669.2	8045.7	8167.3	7942.2	7966.5
CAFS_HM_T_00046858	7619.4	7461.3	7664.6	7916.3	7908.4	8341.6	8581.9	8279	8384.5
CAFS_HM_T_00018915	10822.4	10637.6	10753.5	10233.2	10914.6	9765.6	8334.7	8504.5	8472.4
CAFS_HM_T_00035662	7474	7709.2	7627.5	8106.8	7696.3	8208.8	8300.1	8248.1	8405.9
CAFS_HM_T_00037718	7141.7	7122.5	7333.5	7208.1	7224.1	7522.7	7333.4	7488.4	7537.9
CAFS_HM_T_00008224	567.7	559.5	625.7	587.6	610.4	645.5	767.2	718	762.9
CAFS_HM_T_00070234	1902.8	1972.3	1943.9	1906.6	1949.8	1886.4	1886.3	1937.6	1897.6
CAFS_HM_T_00077283	7300.7	7214.4	7417.6	7726.4	7798.7	8072.8	8306.3	8391.7	8185
CAFS_HM_T_00003584	10524.5	10544.7	10618.2	10386.2	10562.9	10669.9	11153	11033.4	11141.2
CAFS_HM_T_00071402	6503.1	6494.9	6637.3	6788.9	6574.4	6931.8	7224.5	7213.2	7206.8
CAFS_HM_T_00023205	8254.1	8375.3	7622.7	4885.6	8984.3	4263.7	2993	2771.4	2695.9
CAFS_HM_T_00067549	8352.9	8259.8	8431	8400.8	8040.8	8059.5	8480.6	8660.7	8496.9
CAFS_HM_T_00055568	5742.4	5726.8	5623.1	5725.6	5766	5531.6	5435.2	5383.6	5415.2
CAFS_HM_T_00051299	10257.3	10217.1	10359.3	9924.8	9752.5	10309.2	9980.5	9333.8	9602.2
CAFS_HM_T_00039323	8647.7	8518.5	8699.1	9273.9	8951.3	9599.1	9534.6	9506	9685.7
CAFS_HM_T_00003795	6508.9	6460.3	6508.6	6922.9	6679.5	7024.8	7205.6	7221	7252
CAFS_HM_T_00081090	10318.9	10430.2	10427.7	10606.4	10389.5	10530	10503.7	10321.4	10554.6
CAFS_HM_T_00032217	6328.4	6393.8	6386.3	6908.9	6577.8	6987.6	7205.8	7342.3	7163.8
CAFS_HM_T_00001225	22.6	23.6	22	23.1	26	26.1	23.1	19.5	20.8
CAFS_HM_T_00022238	10516.1	10339.3	10945.3	11056.1	10797.6	11402.8	12152.5	11391.7	12051.7
CAFS_HM_T_00036966	8007.4	7973.6	7829.3	8144	8271.9	8047.7	7803.5	7518.3	7719.8
CAFS_HM_T_00085463	83714.2	87543.2	85850.3	89773.2	85508.1	95138	83829.9	86457	88214.4
CAFS_HM_T_00071321	13979.5	13445.7	15482.4	15220.3	8429.7	8783.4	4773.9	5319.7	4918.3
CAFS_HM_T_00086662	7014.3	7058.8	7155.5	7452.6	7416.3	7647.4	7479.5	7576.1	7611.3
CAFS_HM_T_00051687	8482.7	8521.6	8500.4	8919.1	8670.4	8786.9	8875.6	8786.8	8976
CAFS_HM_T_00086333	7174	6959.6	7066.6	7689.4	7674.9	7965.9	8294.7	8061.3	8307.4
CAFS_HM_T_00046698	7828	7874.9	7852	8451.6	8262.2	8576.5	8432	8358.6	8450.5
CAFS_HM_T_00077616	8424	8277	8542	8509	8577	8854.1	8848.3	8994.8	8996.2
CAFS_HM_T_00051394	8883.9	8808.8	9388.7	9115	9217.9	10154.4	10469.8	10375	10444.7
CAFS_HM_T_00061073	7979	7826.8	8133.3	8118.6	8342	8403.1	8507.9	8584.3	8577.8
CAFS_HM_T_00041756	7554	7455.2	7517.3	7252.8	7436.7	7550.4	7705.6	7989.6	8076.6
CAFS_HM_T_00018690	9248.7	9196.8	9120.5	7929.1	8440.3	6953.8	6657.7	6588.9	6445.4
CAFS_HM_T_00015397	7709.6	7659.6	7587.5	7766.7	7793.3	7839.3	7737.3	7888.6	7948.5
CAFS_HM_T_00080910	9074.3	8799	9195.6	8928	8773.8	9414.7	9862.4	9959.5	10030.2
CAFS_HM_T_00030006	6722.6	6819.8	6745.5	6988.2	6708.2	7194.9	7023	7187.4	7239.2
CAFS_HM_T_00082983	8555.6	8632.7	8605.7	8804.8	8782.2	8599.8	8857.4	8979.1	8892.1
CAFS_HM_T_00051134	5443.5	5474.1	5374.8	5619.1	5604.4	5708.9	5875.6	5968.6	5802
CAFS_HM_T_00084406	8373.2	8244.1	8248.9	8519.6	8487	8514.3	9062.4	9014	8919.4
CAFS_HM_T_00050542	7435.7	7406.7	7590.4	6992.9	7150.6	7331.8	7649.8	7448.8	7612.7
CAFS_HM_T_00075125	8799.3	8608.2	8902.4	7396.5	7577.3	7450.6	7528.7	7635.4	7609.7
CAFS_HM_T_00076524	251.1	292.1	229.2	283.3	240.1	258.9	244.2	262.9	259.7
CAFS_HM_T_00015583	8206.7	8150.8	8172.5	8137.8	8401.4	8395.7	8251.5	8272.8	8248.1
CAFS_HM_T_00053449	6085.9	6058.9	6025.8	6170	6265	6471.9	6087.5	6156.7	6133.5
CAFS_HM_T_00003702	8154.4	8065.8	8163.8	9558.8	9177.7	9993.6	10355.1	9935.7	10417.6
CAFS_HM_T_00018002	4530.6	4293.4	4526.4	4398.6	4387.3	4720.6	5052.6	4940.2	5082.2
CAFS_HM_T_00014168	7055.4	7077.3	7038.4	6954.1	6655.3	7092.6	7417	7512.4	7340.6
CAFS_HM_T_00055664	5839.5	5712.2	6073.3	5941	5875.3	6121.9	6490.9	6251.3	6579.6
CAFS_HM_T_00008540	8635.4	8589.7	8469.6	8181.6	8613.3	8318.2	8265.4	8509	8315.2
CAFS_HM_T_00073412	4743	4667.2	4766.7	4896.7	4811.4	5012.5	4957.1	4795.9	4910.7
CAFS_HM_T_00022742	10590	10236.9	11168.5	9909.5	10190.9	10950.6	11152.2	10721.7	11425.3
CAFS_HM_T_00078422	12786.3	12425.7	13099.1	12569.7	12470.3	13154	13299.9	13159.2	13346.2
CAFS_HM_T_00056473	2194.1	2205.2	2149.8	1715.4	1844.5	1549.6	1272.4	1300.8	1305.8
CAFS_HM_T_00045886	4411.8	4410.3	4471.9	4373.6	4240	4429.9	4548.9	4402.5	4528.3
CAFS_HM_T_00015013	7242.1	7121	7085.4	7192.4	7234	7285.9	7474.4	7610	7561.2
CAFS_HM_T_00081432	3300.9	3326.2	3344.7	3610.9	3539.5	3708.3	3843.6	3898.6	3821
CAFS_HM_T_00023582	1573.2	1580.7	1519.8	1460.8	1461.1	1375.4	1337.4	1404.3	1327.2
CAFS_HM_T_00089103	6668.1	6597.6	6813.8	7324.7	7304.8	7408.5	7361.9	7379.7	7330.4
CAFS_HM_T_00041894	5832.4	5661.3	5827.8	5930	5917.8	5935	6235	6149.4	6307.6
CAFS_HM_T_00038994	6665.5	6318.9	6664.2	7047.1	6607	6808.9	8350.4	8101.2	8243.3
CAFS_HM_T_00064882	9547.9	9461.9	9673.3	9270.1	10108.4	9635	9545.1	9436.7	9365.9
CAFS_HM_T_00068065	7679.2	7716.8	7513.4	6749.2	6902.4	6117.3	5444.2	5425.4	5370.6
CAFS_HM_T_00010935	6185.1	6042.9	6238.6	6465.4	6338.4	6418.2	7346.2	7283.7	7348
CAFS_HM_T_00021305	6267	6242.7	6242.2	6645	6385.9	6783.4	6734	6824.2	6668
CAFS_HM_T_00031229	10827.2	10545.2	10779.4	11284.6	11086.4	11781.5	10914.8	11045	10871
CAFS_HM_T_00025242	4611	4598.2	4683	4720	4532.8	4897.2	4998.4	5030.3	5151.1
CAFS_HM_T_00065410	906.5	924.4	887.2	993.2	1000.4	1021.2	1068.5	1055.7	1021.2
CAFS_HM_T_00002728	6835.5	6782	6834.1	7151.2	7161.7	7196	7425.5	7283.9	7434.5
CAFS_HM_T_00069763	6258	6164.9	6342.1	6420.5	6299	6533.6	6672.8	6712.4	6596.9
CAFS_HM_T_00049726	6682.3	6644.2	6907.4	6894.1	6603.1	6611.7	7060.3	6967	7019.5
CAFS_HM_T_00035535	5839.8	5658.8	5607.6	5850.1	5778.5	5997.1	6780.1	6702.5	6850.4
CAFS_HM_T_00044401	4926.2	4585.2	5465.2	4484.1	5450	5188.2	4545.8	5125.5	7539.3
CAFS_HM_T_00049606	6281	6263.4	6184.1	6303.7	6290.2	6268.9	6583.3	6482.7	6501.7
CAFS_HM_T_00065550	7575.4	7460.9	7665.1	7652	7658.1	7982.1	7822.7	7908.4	7998.3
CAFS_HM_T_00047028	6109.2	6123.2	6331.3	6238.9	6310.7	6542.9	6404.7	6490.4	6583
CAFS_HM_T_00040831	7961.1	7729.4	7740.9	8122	8039.1	8157.6	8442.5	8243.9	8120.5
CAFS_HM_T_00091702	5092.9	5030	4990.5	5150.8	5024.9	5073.9	5302.4	5243.1	5342.9
CAFS_HM_T_00050332	10437.9	10324.5	10050.7	10226.1	10088.9	9956.6	9804.7	9904.8	9661.3
CAFS_HM_T_00066061	5875.8	5948	5999.9	6307.8	6242.5	6483	6714.2	6774.8	6896.5
CAFS_HM_T_00058446	6734.8	6709.3	6779.3	6935.5	6819.6	6888.2	7147.5	6937.6	7105
CAFS_HM_T_00036819	3135.8	2999	3024.6	2997.9	2962.6	2970.2	3355.3	2947	3220.6
CAFS_HM_T_00013840	5897	5892.6	5824.7	5668.6	5808.4	5749.5	5840	5917.2	5928
CAFS_HM_T_00016669	1794.7	1762.7	1829	1826.6	1858.2	1687.9	1590.4	1573.5	1524.2
CAFS_HM_T_00052667	9906.4	9705	10070.1	9746.4	10019.8	10311.3	10859.7	10907.6	10917.7
CAFS_HM_T_00077286	7246.3	6940.6	7220.5	8956.4	8682.3	9135.4	10438.7	10504.9	10280.6
CAFS_HM_T_00045250	1666.2	1708.8	1677.9	1742.6	1748.8	1745.8	1859.2	1817.8	1842.3
CAFS_HM_T_00006719	7057.5	7251.1	8004.5	12441.3	13367.4	13512.2	5963.9	6136.4	5377.4
CAFS_HM_T_00024819	4563.9	4588	4711.4	4645.4	4725.8	5000.4	5027.9	5048.4	5302.7
CAFS_HM_T_00023239	6103.8	5929.9	6237.6	5493.1	5651.7	5621.3	5506.3	5327	5462.8
CAFS_HM_T_00026362	7087.3	6959.1	7156.6	7200.6	7228.8	7315.3	7547.6	7451.1	7421.1
CAFS_HM_T_00027820	7350.7	7090.2	8214.2	7024.2	8428.7	6795.4	5823.7	6655	9177.8
CAFS_HM_T_00019251	4735.6	4702.2	4803.5	4989.8	4806.5	5180	5308.3	5235.9	5268.6
CAFS_HM_T_00034703	5892.9	5961.3	6008	6129.8	5905	6215.9	6112	6226.3	6240.4
CAFS_HM_T_00007395	19389.8	19152.9	19651.6	18900.8	18419.7	19547.5	20574.9	19410.2	20088.5
CAFS_HM_T_00057018	5513.1	5494.2	5534	6097	6159.9	6706.4	6717.2	6759.5	6627
CAFS_HM_T_00076176	111.2	124.3	119.8	121.8	114.5	133.1	121.6	122.4	128.9
CAFS_HM_T_00039858	1600	1590.9	1582.1	1561.9	1535.4	1590.6	1670.1	1774	1636.6
CAFS_HM_T_00068323	4495.5	4404.3	4424.3	4918	4843.3	4931.6	5350.1	5345.6	5309.3
CAFS_HM_T_00009980	9988.1	10183.1	10280	10255.3	10279	10564	11577.9	11791.3	11770.1
CAFS_HM_T_00065127	7230.2	7134	7028.7	6719.4	7286.8	7228.4	6899.1	6938.4	6851.7
CAFS_HM_T_00091706	7047.7	6950.6	7024.2	7365.4	7357	7352.7	7863.9	7696.3	7806.5
CAFS_HM_T_00027947	5856.8	5823.9	5795.4	5449.7	5741.6	5350.5	4990.8	4992.2	5053.2
CAFS_HM_T_00018749	3173.8	3300.1	3193.9	3389.5	3307.1	3360.2	3459	3418.8	3461.6
CAFS_HM_T_00049374	5291.7	5367.6	5432	5512.9	5513.4	5518.4	5587.4	5598.1	5599.7
CAFS_HM_T_00079334	8453.8	8210.2	8602.2	8156.8	8444.4	8616	8776	8852.7	8973.5
CAFS_HM_T_00003570	6181.1	6234.4	6005.7	6585.2	6873.9	6426.8	6652.8	6398.9	6512
CAFS_HM_T_00060445	7256.9	7456.6	7228.4	7157.5	7136.7	7157.3	7097.7	7116.9	7237.6
CAFS_HM_T_00040530	7957	7979.7	7969.2	7740.4	7768.5	8080.4	8075.4	8179.8	8004
CAFS_HM_T_00070051	5403.3	5587.2	5409.7	5836.4	5676.4	5596.2	5856	5823.8	5813
CAFS_HM_T_00044195	3090.2	3041.2	3095.3	2986.5	3007.7	3109.3	3137.3	3113.2	3155.6
CAFS_HM_T_00059356	5017.8	4930.7	5032.3	4793.3	4925.8	4666	4859	4594	4869.3
CAFS_HM_T_00034007	8072.4	8113.1	8003.9	8504.1	8390.3	8606.4	8769.4	8602.4	8534.1
CAFS_HM_T_00030642	6515.3	6406.4	6538.1	6199	6459.4	6358.7	6190.1	6181.3	6244.2
CAFS_HM_T_00008334	5203.4	5217.3	5244.1	5621.1	5437.8	5628.7	5570.8	5404.8	5425.7
CAFS_HM_T_00032302	3981.9	3898.5	3942.4	3988.9	4048.7	4141.2	4260.4	4127.2	4217.4
CAFS_HM_T_00064928	1355.5	1330.7	1331.1	1337	1302.1	1248.3	1228	1247.8	1242.8
CAFS_HM_T_00016367	8206.3	8572.8	7600.5	5166.4	8346.6	4081.9	2989.2	2883.2	2689.6
CAFS_HM_T_00056411	6112.4	6224.2	5915.6	6305.4	6172.3	6051.1	6130.4	6508.9	6147.9
CAFS_HM_T_00024634	6871.8	6838.3	6912.4	7321.6	7059.4	7456.8	8002.3	7611.6	7816.8
CAFS_HM_T_00066849	4124.8	4038.3	4130.2	4435	4305.3	4599.2	4498.8	4400.6	4536.1
CAFS_HM_T_00026185	5064.4	5100	5114	5171.4	5191.2	5348.5	5176.1	5241.1	5267.8
CAFS_HM_T_00070491	7473.8	7393.8	7373.8	7371	7411.8	7727	7583.8	7803	7388.2
CAFS_HM_T_00031049	3019.8	2957	2878.7	2938.7	2934.3	2859.4	2928.1	3013.5	2899.9
CAFS_HM_T_00018258	3813.9	3741.1	3925.3	3941.8	3885.7	3966.4	4015.8	4052.3	4054.3
CAFS_HM_T_00045900	5994.1	5897.4	5920.1	5908.4	6029.9	6256.3	6260	6318.3	6236.6
CAFS_HM_T_00048449	7103.8	6830	7120.4	7947.2	7629.2	8277.4	8022.1	7942.4	8027.8
CAFS_HM_T_00022405	5014.8	4932.6	5154.3	5366.6	5288.7	5607.1	5581.3	5339.6	5496.6
CAFS_HM_T_00062457	8456	8105.9	8638.7	9386.3	8575.8	9336.7	9355.4	9169.4	9198.7
CAFS_HM_T_00009213	8767.1	8720.3	9017.3	9062.4	9156.9	9696.2	8807.2	8741	8898.6
CAFS_HM_T_00052592	1997.2	1938.1	2029	2013.3	2031.6	2056.5	2075.8	2119.6	2171.7
CAFS_HM_T_00064181	6075.3	5968.1	6127.2	6004	6172.2	6075.5	6171.8	6123.1	6135.7
CAFS_HM_T_00081013	6155.3	6091.2	6016	6006.2	6319.9	6147.1	6410.7	6339.7	6293.5
CAFS_HM_T_00090706	6663.4	6656.5	6910.3	7042.9	6857.2	7290	7169.3	7352.3	7213.2
CAFS_HM_T_00014281	8325	8446.4	8763.8	8731.3	9004	9767.9	9323.8	9304	9535.8
CAFS_HM_T_00027633	8513.8	8452.4	8494.6	8580.9	8479.8	8836.7	9076.2	9115	8970.4
CAFS_HM_T_00038065	11663.9	11344.5	11609.6	10837.8	10311.7	10562.7	10766.7	10495.2	10420.3
CAFS_HM_T_00032587	853.2	902.6	894.7	940.8	917.6	958.2	952.5	939	936.4
CAFS_HM_T_00027074	5421.8	5401.7	5571.2	6520	5014.7	5128.9	4330.1	4521	4459.5
CAFS_HM_T_00082302	9586.8	9425.9	9470.6	9426.5	8874	9297.9	9287.6	8989.5	9189.2
CAFS_HM_T_00045362	7033	7042.5	7100.4	6421.5	6636.3	6729.5	6257.1	6154.9	6276.7
CAFS_HM_T_00076880	7165.3	7014.7	7210.2	7389.9	7458.2	7646.6	8530.1	8601.1	8552.7
CAFS_HM_T_00017862	7212.7	7238.3	7060.7	6693.8	7218.3	6119	5448.1	5544.6	5409.5
CAFS_HM_T_00012722	8596.9	8408.7	8438.9	8344.4	8642.5	8358	8657.5	8548.2	8425.5
CAFS_HM_T_00055699	11294.3	11120.5	10665.6	11009.1	10496.5	10670.9	12057.7	11934.3	11843.7
CAFS_HM_T_00021376	8397.4	8340.7	8486.9	8518.1	8622.3	8660.9	8636.9	8720.4	8613
CAFS_HM_T_00082978	8248.7	8181.7	8228.5	7040.7	7740.6	7094.6	6614.3	6714.4	6738.9
CAFS_HM_T_00086550	982.2	981.5	961.5	961.3	975.2	980.4	946	961.7	958.5
CAFS_HM_T_00048935	7021.5	6772.1	6900.5	6791.9	6749.3	6995.7	7191.1	7194.9	7043.1
CAFS_HM_T_00075979	227	407.7	215.5	529	235.5	250.4	185.5	197.3	178.6
CAFS_HM_T_00062388	5545.4	5482.4	5705	6010.3	6082.2	6470.5	6221.7	6082.7	6248
CAFS_HM_T_00091719	1001.3	968.4	985.9	997.9	1017.9	1013.1	1027.3	1072.5	1054.6
CAFS_HM_T_00033535	6264	6127.7	6329.3	6147.9	5947.4	6179.3	6715.4	6681.8	6664.7
CAFS_HM_T_00051670	6922.7	6834	7088.7	6455.6	6346.7	6613.2	7287.3	7429.8	7318.4
CAFS_HM_T_00080171	7737.7	7661.2	7788.4	5813.9	6352.4	5197	4478.4	4604.9	4490
CAFS_HM_T_00038746	10609.8	10389.9	11170.1	11523.4	11010.4	12039.7	12141.8	11680	12204.6
CAFS_HM_T_00010215	5663.1	5852.1	5657.7	5796.1	5760.5	5757.7	5803.2	5907.4	5847.4
CAFS_HM_T_00045863	3680.4	3654	3637.4	3823.4	3786.7	3895.5	3913.8	3870.6	3867
CAFS_HM_T_00031942	5717.8	5715.1	5590.8	5769.7	5624.4	5687.7	6127.7	6066.2	6002
CAFS_HM_T_00067645	2244.7	2272.4	2185.2	2093	2259.8	2107.7	1743.6	1757.4	1742.1
CAFS_HM_T_00042409	1366.3	1362.6	1377.5	1394.5	1424.9	1443.1	1367.2	1335.1	1382.3
CAFS_HM_T_00027817	4001.9	3953.8	3780	4023.3	3822.5	4044.1	4079	3983.8	3993
CAFS_HM_T_00017811	4875.4	4845.9	4891.9	4734.1	4882.2	4717.5	4908.9	4903.2	4977.3
CAFS_HM_T_00018151	5187.8	5099.8	5256.8	5350.1	5285.6	5657.2	5590.1	5666.3	5648.6
CAFS_HM_T_00077598	6587.9	6481.6	6489.2	6696.6	6578.2	6607.6	6673	6858.8	6922.5
CAFS_HM_T_00012213	7339.1	7026.4	7347.7	8450.3	7569.5	8619.2	7743.7	7586.9	7771.8
CAFS_HM_T_00071018	6408.5	6529.9	6857.2	6632.8	6611.4	6899.9	6829.1	6810	6930.6
CAFS_HM_T_00091137	5294.8	5377.1	5122.1	5422.1	5354.9	5786	5441.7	5402.8	5404.5
CAFS_HM_T_00013675	5693.7	5639.2	5967.3	5588.3	5810.1	6011.9	6217.8	6308.1	6604.2
CAFS_HM_T_00020835	9627.8	9547.4	9828.4	10314.2	9932.2	10441.8	10418.1	10055.5	10508.3
CAFS_HM_T_00088131	4589	4498.7	4535.2	4631.3	4593.4	4796.7	4616	4920.3	4681.8
CAFS_HM_T_00070563	10045.3	9923.9	10294.2	10457.5	10472.2	10646.7	10775.8	10535.3	10653.5
CAFS_HM_T_00090319	4417.3	4398.8	4385.9	4331.8	4334.6	4446.5	4422.3	4357.1	4461.7
CAFS_HM_T_00062812	3367.2	3465.3	3277.6	3690.3	3498.6	3559.5	3407.3	3504.5	3513.6
CAFS_HM_T_00045808	5282.3	5212.4	5314.4	5401	5551.1	5732.4	5719.3	5794.6	5856.7
CAFS_HM_T_00078073	14552.2	14645.4	15273.6	5096.3	4823.2	4241.3	4010.2	4361.3	4292.1
CAFS_HM_T_00033486	4761	4791.3	4744.7	4981.9	4883	5076.2	4968	5101.8	5130.1
CAFS_HM_T_00036935	5748.5	5689.5	5777.7	5513.7	5700.3	5592.2	5570.6	5617.5	5527.3
CAFS_HM_T_00031348	6005.1	5959.4	5894.5	5842.7	5816.8	5942	6092.8	6253.3	6167.1
CAFS_HM_T_00049109	4199.1	4303.2	4200.4	4407.1	4428.8	4473.1	4526	4539.5	4532.1
CAFS_HM_T_00027584	7538	7406.7	7557.3	7959	7640.6	8069.8	8279.6	8379	8404.9
CAFS_HM_T_00063417	5221.7	5250.8	5197.4	5434.7	5401.7	5544	5616.7	5494.6	5542.4
CAFS_HM_T_00008623	7404	7391.7	7418.3	7591.2	7695.1	7798.6	8096	7737.3	8124.5
CAFS_HM_T_00001457	7543	7559.4	7216.5	7760.5	7775.5	7732.4	7855.8	7563.7	7618.7
CAFS_HM_T_00014875	4242.6	4107	4133.9	4265.5	4349.1	4206.1	4107.7	4098.5	4098.9
CAFS_HM_T_00082500	5285.3	5194.5	5244.5	5033.6	5193.1	5054.8	5102.6	5170.6	5143.1
CAFS_HM_T_00067100	1587.4	1544.7	1523.1	2002.1	1949.5	1934.3	2160.6	2033.7	2085.1
CAFS_HM_T_00028713	4623.9	4641.7	4599.7	4876.3	4917.5	4785.3	4920.2	4898.8	4936.9
CAFS_HM_T_00071403	6895.7	6774.6	6974.2	6937.7	7145.5	7093.7	7171.6	7198	7248.8
CAFS_HM_T_00016782	5499.7	5505.2	5292.8	5251.2	5315.5	5109.8	5013.5	4975.8	4878.1
CAFS_HM_T_00045056	7176.6	7047.7	7213.5	7514.7	7444.7	7748	7858.6	8045.1	7921.8
CAFS_HM_T_00008821	4550.3	4521.7	4430.5	4713	4701.5	4759	4946.8	4809.7	4970.6
CAFS_HM_T_00000968	880	875.9	1017.5	1174.1	689.9	677.4	400.7	419.7	402.4
CAFS_HM_T_00054150	4612.7	4600.8	4691.1	4713.1	4664	5058.9	4835.3	4806.5	4824.7
CAFS_HM_T_00014015	4151.8	3975.5	4759.9	3826.8	4861.7	4181.6	3518.9	4085	6041
CAFS_HM_T_00042530	6138.9	6134.5	6195.4	6226.2	6220.7	6445.2	6479	6534.8	6534.2
CAFS_HM_T_00019321	5422.8	5616.3	4948.3	3594.4	4129.7	2901.6	1561.3	1703.5	1507.7
CAFS_HM_T_00074845	6160.8	6045.4	6231.3	6356.1	6101	6450.6	6474.2	6485.6	6515.3
CAFS_HM_T_00031409	5205.7	5065.3	5086	5324	5037.5	5189.6	5087.1	5299.9	5256.4
CAFS_HM_T_00044466	5581.8	5430.7	5637.6	5478.7	5493.7	5800.9	5594	5864.7	5690.9
CAFS_HM_T_00014742	5106.7	5111.6	5163.1	5002.4	5014.4	5048.8	4949.8	5005.4	4948.1
CAFS_HM_T_00029107	4391.3	4411.7	4669.5	4725.6	4634.6	4907.1	4939.4	4987.6	4869.6
CAFS_HM_T_00028216	5767.7	5758.2	5879.9	6393.6	5986.7	6557.3	6396.9	6202.3	6166
CAFS_HM_T_00008957	7035.2	7015.8	6894.5	5956.1	6499.5	5678.2	5264.5	5490	5282.3
CAFS_HM_T_00052684	4901.7	4883.5	5073	5141.9	5083.8	5180.7	5178.4	5190.6	5308.2
CAFS_HM_T_00066681	4086.7	4263.3	3922.5	4172.4	4068.9	3854.7	3899.4	3755.2	3846.1
CAFS_HM_T_00031689	5393	5451.4	5291.1	5307.2	5306	5212.4	5234.4	5334.7	5194.3
CAFS_HM_T_00038878	13263.5	12704.9	13170.2	12007.1	12194	12662.5	12821.1	12005.4	12421.7
CAFS_HM_T_00041635	3397.3	3410.4	3394.5	3516.4	3535.9	3629.8	3604.9	3524.1	3569.5
CAFS_HM_T_00060914	6545.4	6355.4	6426.2	6961.4	6740.7	7014.5	6164.5	6344.3	6092
CAFS_HM_T_00037681	9132	8737.1	9312.9	9272.5	8960.3	9529.9	9383.6	9208.2	9384
CAFS_HM_T_00069136	5173.7	5069	5065.3	5403.8	5398.2	5475.3	5580.3	5508	5633.2
CAFS_HM_T_00047699	328.9	353.4	324.7	284.7	331.4	279.9	252.7	238.8	255.5
CAFS_HM_T_00043726	3601	3612.3	3575.2	3756.8	3769.6	3879.4	4001.1	3988.6	3977.1
CAFS_HM_T_00046103	6220.4	6213.7	6140.1	6453.9	6284.2	6436.2	6317	6447.7	6448.8
CAFS_HM_T_00001453	6755.3	6661	6960.5	6663.9	6335.9	6721.6	7632.9	7167.7	7641.5
CAFS_HM_T_00067536	6121.2	5965.1	6021.7	6505.4	6628.8	6686.9	6992.2	7126.5	6905.6
CAFS_HM_T_00037368	9181.6	9223.7	9625.3	8393.2	8996	8680.2	8013.7	7970.8	8095
CAFS_HM_T_00050362	4728.8	4657.9	4526.7	4346.8	4952.1	4140.2	3680.1	3612.4	3644.2
CAFS_HM_T_00015516	5998	5992.4	6160.2	6112.3	6226.8	6271.9	6469.3	6424.6	6368.7
CAFS_HM_T_00084915	6358.9	6136.9	7338.3	9155.9	5330.8	5557.3	2657.8	3033.6	2906.7
CAFS_HM_T_00070626	4794.9	4693.1	4737.9	4861.2	4961.8	5039.4	5219.7	5194	5243.5
CAFS_HM_T_00073685	5784.7	5732.6	5852.5	5918.2	6314.6	6265.7	6387.8	6245	6343.8
CAFS_HM_T_00086755	6493.3	6669.2	6165.3	5584.5	6282.9	5129.9	4482.2	4645	4503.2
CAFS_HM_T_00068410	4374.2	4295.4	4352.6	4210.7	4328.7	4200.5	4228.1	4249.8	4266.9
CAFS_HM_T_00061301	5661.8	5529.2	5416.2	5804.4	5698.7	5831	6074.6	6050.9	6061.5
CAFS_HM_T_00061797	5983.2	6273.6	5621.9	4384.3	5455.9	3836.8	3376.1	3447.8	3304.2
CAFS_HM_T_00055425	8048.6	7950.1	7930.2	8366.1	8222.1	8315.2	8650.3	8597.5	8434.8
CAFS_HM_T_00062038	7442.7	7101.4	7433.2	6766.9	6864.2	6982.4	7185.3	7266.9	7237.4
CAFS_HM_T_00088929	5913.8	5934	6022	6363.8	6170.2	6405.5	6536.6	6554.1	6595.9
CAFS_HM_T_00052124	5632	5436.8	5577.7	5340.1	5113.3	5469.6	5435.5	5127.3	5425.7
CAFS_HM_T_00064658	3484.7	3403.9	3500.6	3516.8	3548.3	3661.9	3717.3	3694.5	3753.5
CAFS_HM_T_00063619	5776.9	5926.7	5469.3	4877.5	5754.7	4849.1	4776.3	4722.2	4501.7
CAFS_HM_T_00029377	5039.7	5033.5	5081.2	5184.4	5156.8	5283.7	5386	5500.5	5465.2
CAFS_HM_T_00038965	6576	6402.9	6545.2	6616.9	6498	6770.5	6901	6865.9	7038
CAFS_HM_T_00070681	4105	4052.5	4083.8	4532.3	4232.9	4638.4	4335.1	4310.8	4314.6
CAFS_HM_T_00035492	5964.9	5826.6	5996.5	6040.4	5988.2	6329	6608.2	6648.5	6753
CAFS_HM_T_00091403	7567.7	7599.4	7641.5	8356.1	7954.6	8414.9	8819.1	7772.8	8164.7
CAFS_HM_T_00013126	6719.2	6877.4	6797.9	7249.6	7511.8	7504.2	7394.8	7295.1	7404.8
CAFS_HM_T_00000528	3981.5	3908.1	3882	4131.3	4146.2	4034.3	4206.3	4122.1	4233.6
CAFS_HM_T_00040871	4804	4743.7	4937.2	6341.4	7248.8	6938.3	4642.2	4658.7	4314.7
CAFS_HM_T_00069036	8511.2	8529.5	8745.7	8565.4	8711.4	8930.2	9228.4	9147.1	9274.1
CAFS_HM_T_00070772	4531.1	4687.3	4649.2	4718.9	4786.3	4990.2	4824.5	4761.6	4895.3
CAFS_HM_T_00037855	5751.4	5814.6	5739.7	6019.7	5742.3	6084	5934.3	5754.9	5841.8
CAFS_HM_T_00022179	4476.6	4366.1	4344.8	4629.8	4523.5	4842.1	5056.1	4992.4	5025.8
CAFS_HM_T_00005390	5108.6	5015.9	4879.1	4669.1	4661.8	4712.3	5080.1	5148.3	4983.5
CAFS_HM_T_00022776	6455.4	6414.7	6514.2	6641.8	6459.1	6752.2	6534.7	6654.8	6604
CAFS_HM_T_00057687	7401.9	7292.1	7289.5	7778.4	7613.8	7659.9	7963.3	7950.2	7776
CAFS_HM_T_00044494	9562.7	9319.6	9713.9	9861.7	9970	10440.8	10151.9	9846	10373.4
CAFS_HM_T_00068905	4911.7	4831.8	4935.5	4738.6	4619.7	4789.6	4804.9	4787	4870.3
CAFS_HM_T_00021073	4695.2	4621.2	4601.3	4592.1	4790.2	4715.6	4298.2	4524.9	4516.3
CAFS_HM_T_00069747	2930.2	2883.4	2935.7	3028.2	2939	3104.1	3141.7	3065.2	3208.2
CAFS_HM_T_00036669	25798.6	28078.9	26110.7	29773.7	25557.8	27117.8	27068.7	26569.4	27638.5
CAFS_HM_T_00090684	7909.7	7830.5	8093.4	8702.3	8374.6	8793	9245.8	8859.7	9099.5
CAFS_HM_T_00044065	6414.1	6396.3	6257.3	5720.7	6245.8	5783.1	5678.3	5799.1	5660.5
CAFS_HM_T_00029551	4142.8	4204.1	4240.2	4236	4212.5	4252.4	4145.5	4238.6	4189.2
CAFS_HM_T_00053128	735.4	716	654.1	754.4	725	729.2	811.6	739.9	752.8
CAFS_HM_T_00052313	4547.7	4562.1	4658	4643.9	4672	4946.7	5158.5	5167.5	5188.8
CAFS_HM_T_00047022	5379.8	5287.7	5278.4	5643.8	5424.8	5373.3	5653.5	5651.5	5565.2
CAFS_HM_T_00047753	6701.6	6694.2	6878.7	6731.2	6774.3	7285.5	6565.5	6712.8	6625.3
CAFS_HM_T_00085288	6594.3	6410.3	6677.9	6607	6665.4	7013.5	7069	7466	7433.1
CAFS_HM_T_00042104	4383.9	4339.7	4295.4	4430.6	4402.5	4552.6	4430.6	4458.5	4491
CAFS_HM_T_00018125	1670.8	1689.9	1663.1	1872.7	1944.9	1933.4	2009.6	1961.2	1927.3
CAFS_HM_T_00018783	3823.3	3958.1	3806	4012.4	3946.4	3995.4	4234.9	4165.7	4160.5
CAFS_HM_T_00046804	8487.2	8407.1	8595.3	8547.4	8508	8699.2	8632.3	8810.7	8758.4
CAFS_HM_T_00043102	5595.8	5721.6	5682.4	5684.1	5725.6	5701.6	5529.8	5443.9	5426.9
CAFS_HM_T_00032818	6999.4	6771.3	7039.4	7140	7063.4	7291.7	7893.4	7394.3	7590.1
CAFS_HM_T_00089324	5968.4	5885.5	5576.8	5363.8	5866.9	5048	4891.3	4773.7	4876.8
CAFS_HM_T_00016920	3598	3545.6	3563.9	3506	3512.2	3668.1	3639	3739.8	3736.5
CAFS_HM_T_00028202	4550.2	4327.6	4627.3	4235.3	4122.6	4309.9	3992.4	4023.8	4048.7
CAFS_HM_T_00010014	4723	4766.2	4682.4	4817.1	4902.7	4753.7	5048.1	4836.9	4906.2
CAFS_HM_T_00081762	4152.5	4073.5	4127.9	4722.2	4801	4938.7	5640	5244.9	5491.3
CAFS_HM_T_00079405	6798.4	6783.9	6807.3	6814	6917.3	6942.1	7187.5	7316.9	7215.2
CAFS_HM_T_00029239	1721.5	1690.5	1712.6	1736.7	1713.6	1670.7	1826.8	1779.4	1824
CAFS_HM_T_00077372	7430.3	7421	7377.1	7224.4	7387.3	7295.8	7291.3	7308.8	7414.4
CAFS_HM_T_00073202	4688.9	4758.4	4870.7	4570.9	4341.9	4503.6	4852.8	4682.8	4841.8
CAFS_HM_T_00009810	9242.6	9244	8580.7	6081	7225.7	5233.9	4669.5	4572.3	4613.6
CAFS_HM_T_00090276	1833.7	1899.6	1775.9	1934.7	1872.9	1807.9	1817.3	1881.7	1782.1
CAFS_HM_T_00000966	769.5	810	788.5	1171.3	757.1	761.1	539.5	546.9	568.6
CAFS_HM_T_00049133	5211	5069.1	5256.2	5259.3	5517	5802.9	5775.2	5752.6	5738.1
CAFS_HM_T_00006604	6293	6296.1	6425.1	6703.4	6374.3	6348	6685.5	6658.3	6335
CAFS_HM_T_00065303	5630.1	5749	5894.1	5792.7	5767.1	6104.9	6884.8	7044.6	7244.1
CAFS_HM_T_00028114	4007.1	4162.8	3987.9	3951.8	4061.6	4017.5	3990.6	4108.7	4027.9
CAFS_HM_T_00053290	4067.5	3906.3	3998.9	3669.3	3769.7	3610.2	3750.1	3854.5	3923.1
CAFS_HM_T_00082850	7117.9	7023.3	6993.2	7438.2	7178.3	7523.7	6919.3	6802.1	6544.5
CAFS_HM_T_00087448	12947.7	13942.8	11721.5	7538.6	11382.6	5461.2	3877.2	3806.8	3517.2
CAFS_HM_T_00042609	3288.7	3403.8	3313.3	3396	3500.9	3413.2	3254.7	3300.7	3284
CAFS_HM_T_00082604	5203.7	5161.2	4972.6	5223.8	5242.4	5233	5540.9	5477.7	5351.3
CAFS_HM_T_00087268	5741.6	5727	5618.6	5107.7	5522.8	4745.6	4584.6	4753.4	4447.3
CAFS_HM_T_00069710	8394.6	8091.2	8454.2	7880	8223	8230.8	8766.4	8377.7	8868.5
CAFS_HM_T_00068756	4181.8	4106.5	4136.4	4331.1	4267.4	4405.2	4681.7	4513.4	4554
CAFS_HM_T_00050545	3661.8	3709.3	3796.7	3670.7	3613.9	3739.3	3883.4	3933.4	4009.9
CAFS_HM_T_00035121	6019.2	6049.6	6192	6326.9	6363.2	6471.9	6722.3	6721.6	6757.4
CAFS_HM_T_00061238	5683.3	5676.6	5615.9	5419.6	5565.3	5489.8	5397.1	5363.5	5342.5
CAFS_HM_T_00074186	5412.1	5289.3	5465.7	5154.1	5210.7	5959.5	6395.4	5851.4	6385.6
CAFS_HM_T_00014129	4271.7	4111.2	4149.7	3896.7	3929.8	3949.7	3812.7	3766.9	3715.5
CAFS_HM_T_00040840	4630.8	4712	4926.7	4623.5	4661.5	5023	5288.8	5047.5	5420.2
CAFS_HM_T_00008159	620.6	633.2	636.1	613.4	597.4	580.1	753.7	738.9	724.7
CAFS_HM_T_00020108	4373.9	4427.9	4351	4657.6	4422.8	4643.8	4913	4938.5	4906.2
CAFS_HM_T_00037811	3697.6	3735.1	3734.6	4022.4	4129.5	3881.5	3574.6	3746.2	3444.8
CAFS_HM_T_00064807	1756.1	1789.5	1682.2	1974.8	1964.8	2037.7	1813.7	1841	1836.1
CAFS_HM_T_00016804	3479.7	3443.2	3525.6	3624.8	3586.8	3820.6	3747.6	3779.5	3710.6
CAFS_HM_T_00015784	3226.3	3146.8	3172.5	3462.9	3452.1	3500.2	4030.8	4110.1	4035.8
CAFS_HM_T_00028107	10473.2	10862.9	10923	11863.2	11191.5	11716.9	11840.4	11500.3	11991
CAFS_HM_T_00083467	2790.2	2778.5	2779.7	2786.3	2864.3	2813.6	2854.6	2913.7	2828.7
CAFS_HM_T_00055832	5175.2	4863.9	5000.7	5496.2	4757.3	4991.2	5545.5	5400.6	5524.2
CAFS_HM_T_00090739	4735.7	4589.2	4671.6	4509.2	4420.4	4554.4	4831	4954.2	4865.9
CAFS_HM_T_00005902	201.8	191.1	187.5	197.3	220.8	223.9	973.1	723.8	420.7
CAFS_HM_T_00034495	3980.4	3926	4211.7	3998.6	4136.6	4202	4180	4180.3	4289.3
CAFS_HM_T_00072531	3584	3511.5	3573.6	3737.8	3642.1	3786.7	3743.5	3680.4	3734.5
CAFS_HM_T_00053755	1015.1	986.5	968.4	977.4	935.6	950.1	994.1	967.3	988.8
CAFS_HM_T_00045017	4450	4557.3	4414.7	4832.7	4854.6	4888.7	4491.3	4420.8	4446.5
CAFS_HM_T_00018993	4571.3	4465.4	4569.2	4490.9	4562.4	4628.1	4572.9	4603.8	4727.1
CAFS_HM_T_00008033	161.9	162.5	160.1	165	145.8	151.9	151.5	161.2	165.9
CAFS_HM_T_00069383	4966.7	5019.5	5115.6	5082.5	5219	5229.4	5400.9	5437.8	5415.2
CAFS_HM_T_00076832	4151.9	4161.2	4133.4	4408.1	4195.3	4229.2	4324.4	4339.6	4305
CAFS_HM_T_00048959	6193.7	6091.6	6167.7	6042.9	6116.3	6299.4	6241.4	5963	6012.1
CAFS_HM_T_00036799	5997.5	5968.5	5992.2	6129.7	6027	6209.9	6462.9	6551	6427.1
CAFS_HM_T_00038250	3059.3	3063.9	3131.3	3052.3	3052.5	2911.9	2816.2	2884.3	2918.7
CAFS_HM_T_00033691	2793.9	2795	2717.1	2587.9	2649.4	2572.1	2595.4	2588.7	2535.2
CAFS_HM_T_00079203	3306.7	3464.8	3325.6	3413	3346.4	3397.4	3328.1	3367.8	3380.7
CAFS_HM_T_00051111	5439.7	5443.8	5461.1	4844.1	5272.2	4194.6	3350.8	3788.6	3350.4
CAFS_HM_T_00065427	3883.6	3711.5	3825.1	4000.6	3923.2	3861.1	3932.4	3814.9	3976.8
CAFS_HM_T_00029609	2637.7	2642.3	2633	2617.3	2669.6	2749	2703.7	2599.9	2719.3
CAFS_HM_T_00015662	4430.9	4356	4356.2	4592.5	4574.9	4716	4918.9	4801.7	4853
CAFS_HM_T_00053158	5136	5232.9	5401.4	5058.1	4955.7	5255.8	5098.2	5095.9	5285
CAFS_HM_T_00030402	5445.3	5406.6	5440.7	5312.2	5461.9	5358.7	5292.1	5494.1	5436.5
CAFS_HM_T_00045822	9772.8	9585.4	10001.5	10161	9851.2	10131.4	10767.7	10622	10734.9
CAFS_HM_T_00090410	6596	6554.2	6860.9	6761.5	6572.2	7077.7	6929.6	7263.9	7140.9
CAFS_HM_T_00029945	3456.7	3476.4	3513.9	3331.5	3458.9	3415	3275.1	3418.5	3385.9
CAFS_HM_T_00016595	3338.6	3423.2	3352.3	4021.7	3757.6	3889.4	4111.1	4087.6	4074.1
CAFS_HM_T_00000309	4225.5	4116.1	4240	4247.3	4105.2	4506.5	4196	4249.6	4254.1
CAFS_HM_T_00047596	4398.7	4301.2	4471.8	4424.5	4442.1	4591.1	4482.8	4476.3	4528.2
CAFS_HM_T_00081054	5627.8	5587.4	5784.5	5536.1	5571.9	5797.4	6053.5	6083.6	6151
CAFS_HM_T_00055819	4277.1	4187.8	4076.2	4296.9	4334.1	4318.3	4478.7	4371.5	4358.7
CAFS_HM_T_00031202	4472.3	4489.1	4435.2	4352	4603.3	4631.6	4619.9	4587.2	4703.6
CAFS_HM_T_00051723	5924.2	5862.3	5722.4	5725.4	5940.9	5526.3	5181.3	5113.7	4961.3
CAFS_HM_T_00020008	3489.9	3498.7	3607	3554.8	3553.7	3679.8	3529.2	3464.4	3552.8
CAFS_HM_T_00009647	4047.2	4115.8	3999.4	3906.3	4026.4	4139.5	3995.7	4037.3	4125.9
CAFS_HM_T_00017188	4888.6	4627.2	4465.9	4938.4	4719	4660.6	5200.5	4798.7	5100.1
CAFS_HM_T_00009747	2639.5	2640.9	2582.6	2664.3	2687.9	2688.8	2911	2838.8	2885.6
CAFS_HM_T_00058680	4916.5	4961.3	4775.8	4642.2	4759	4624.3	4838.8	4765	4853.6
CAFS_HM_T_00034480	9798.6	9388.1	9695	10354.6	10294.1	10264.5	10352.7	9933.3	9617
CAFS_HM_T_00018523	3682.5	3658	3656.7	3917.1	3812.5	3965.1	4015.4	3908.2	4106.2
CAFS_HM_T_00085736	3611.1	3523.1	3633.2	3827.1	3813.3	3933.8	4112.9	4072.4	4069.5
CAFS_HM_T_00065429	5112	5471	5085.4	5113.5	5065.3	4845.4	4740.4	4812.6	4789.1
CAFS_HM_T_00055875	4520.7	4420.6	4746.5	4763.3	4559.9	5056.6	5121.4	4948.3	5365.2
CAFS_HM_T_00070298	5113.9	5050	4989.3	5139	5036	5363.3	5290.6	5391.4	5342.4
CAFS_HM_T_00088739	11282	11964.7	11323.9	12171.5	11112.8	11720.5	10959.5	10848.4	10709.2
CAFS_HM_T_00092004	2329.6	2330.8	2396	2612.3	2916.5	2797.5	2662.3	2471.7	2433
CAFS_HM_T_00016084	8801	8831.6	9141.3	9178.5	9047.5	9416.7	9714.2	9901.8	10137.6
CAFS_HM_T_00018049	3966	4018.2	3990.2	4111.8	4067	4074.7	4058.9	4158.7	4217.8
CAFS_HM_T_00045124	5478.7	5555.4	5330.5	4274.3	4739.6	3984.5	3320.1	3232.2	3176.6
CAFS_HM_T_00028088	4928.8	5012	4873	4876.9	5147.4	5109.2	4815.5	4760.5	4772
CAFS_HM_T_00064081	8183.8	7978.5	7956.9	8313.2	8150.3	8282.4	8548.7	8248	8486.7
CAFS_HM_T_00017527	613.1	637.8	610.9	567.2	587.6	564.9	432.9	437.4	416.3
CAFS_HM_T_00034377	4050.5	4038.9	4087.7	4338.2	4268.4	4382.5	4428.2	4378	4714
CAFS_HM_T_00012602	14796.2	15908.2	15342.5	16718	15390.6	15731.8	18624.2	19213	18313.5
CAFS_HM_T_00049206	4753.1	4587.3	4626.2	4856.4	4884.9	4887.5	4886.7	4914	4908.6
CAFS_HM_T_00055945	5412.9	5497.4	5312.3	5644.1	5525.3	5490.6	5666.9	5693.5	5664
CAFS_HM_T_00082670	4386.2	4352.9	4323.4	4952.3	5044.5	5251.9	5526	5351.8	5539
CAFS_HM_T_00057589	6715.8	6827.3	6819.6	6972	6869.7	7238	7162.6	7041.6	7350.9
CAFS_HM_T_00000636	4395.5	4223.2	4283.6	4188.2	4367.1	4481.2	4932.4	4900.8	4926.4
CAFS_HM_T_00018595	4372.5	4417.8	4389.3	4201.2	4294.1	4231.6	4182.6	4286.1	4309.7
CAFS_HM_T_00071620	5997.5	6069.7	5815.4	6159	6164	6372.9	6145.3	6131.9	6228.3
CAFS_HM_T_00062757	9143.4	8893.5	9481.8	9300.4	8899.5	9596.4	10081.2	10211.4	10100.7
CAFS_HM_T_00044595	4636.2	4633.2	4575	4568	4568.7	4705.4	4789.1	4661.2	4777.1
CAFS_HM_T_00070447	1191.7	1177.9	1181.8	1220.4	1243.2	1252.7	1238.2	1246.3	1229.5
CAFS_HM_T_00077336	5812.2	5524.1	6207	7633.5	4382.4	4276.3	2069.1	2153.3	2050.6
CAFS_HM_T_00008273	4749.7	4893.4	4869.9	5049.1	5007.4	5124.5	5104.7	5185.9	5149.2
CAFS_HM_T_00015634	4896	4885.6	5194.2	5048.1	4991.5	5085.5	4652.6	4656	4628.1
CAFS_HM_T_00029976	2554.3	2535.7	2520.5	2497.7	2792.6	2590.2	2798.9	2663	2746.4
CAFS_HM_T_00073332	3314.9	3242.1	3297.1	3544.2	3239.4	3571.2	3523.3	3571.3	3604.8
CAFS_HM_T_00024850	781	772.4	779.5	686.2	700.2	713.8	822.5	869.8	797.8
CAFS_HM_T_00070467	6303.4	6400.2	6252.9	6366	6341	6430.9	6656.2	6674.7	6714.5
CAFS_HM_T_00019248	5386.1	5437.5	5354.3	5421.9	5407.3	5615.1	5420.6	5557.3	5547.3
CAFS_HM_T_00031224	3980.4	3981.3	4056.2	4155	4194.1	4256.9	4214.7	4256.5	4247.8
CAFS_HM_T_00005027	4123.8	4077.9	4127.2	4321.4	4358.9	4742.5	4616.3	4622.2	4730.5
CAFS_HM_T_00009377	3333.9	3169.6	3137.3	3284.2	3249.6	3513	3621.6	3420	3550.2
CAFS_HM_T_00043184	4895.4	4837.3	4869.4	4834.5	4849.6	5063.7	5100.1	5117.6	5031.6
CAFS_HM_T_00006377	4673.6	4560.7	4638.4	4791.2	4633.6	4990.9	5022.5	5036.8	5005.6
CAFS_HM_T_00070925	2119.8	2184.6	2158.3	2424.6	2336.8	2449.6	2538.3	2383.6	2513.6
CAFS_HM_T_00052474	4657	4639.6	4664.7	5064	5011.9	5161.6	5207.9	5377.9	5094.2
CAFS_HM_T_00065280	4232	4242.6	4072.7	3899.4	3936.6	4025.1	3991.8	3946.5	3960.1
CAFS_HM_T_00088449	2450.5	2453.3	2496.1	2481	2494.5	2596.6	2382.9	2511.1	2550.2
CAFS_HM_T_00046550	2768.3	2773.2	3108.3	1657.7	1533.1	1449.7	1579.1	1685.5	1646.2
CAFS_HM_T_00058131	3610	3552.3	3434.2	3726.4	3709.1	3929.8	3894	3929.4	4012.2
CAFS_HM_T_00049474	4261.3	4211.6	4173.9	4124.4	4094.6	3995.1	4517.8	4351.1	4516.5
CAFS_HM_T_00060340	3531.9	3591	3629	3485.5	3499.2	3667	3711.2	3782.3	3901.3
CAFS_HM_T_00046921	4471.8	4546.3	4468.7	4753.4	4870.6	4717.9	4715.6	4915.9	4595.7
CAFS_HM_T_00086819	3744.7	3728.8	3861.9	3703.9	3777.4	4027.7	3816	3900.9	3940.6
CAFS_HM_T_00006597	6301.9	6301.8	6515.3	6749.3	6557.5	6849.1	6895.6	6991.9	6999.3
CAFS_HM_T_00064915	3517.2	3545.3	3495.3	3705.5	3653	3673.4	3896.3	3947.2	3936.7
CAFS_HM_T_00009694	3110.3	3073.5	3184.9	3023.1	2930.3	3102.3	3164.6	3370.2	3331.1
CAFS_HM_T_00004032	817.6	836.8	860.7	965.7	930.4	1010.9	856.5	875.8	867.9
CAFS_HM_T_00071568	3872	3812.2	3810.2	4190.1	4169.2	4322.5	4016.2	4168.9	4054.4
CAFS_HM_T_00006815	10752.9	11302.3	10011.6	5705.4	8688.1	4332.9	3178.2	3142.7	3015.6
CAFS_HM_T_00064199	4226.1	4200.9	4260.1	4190.7	4299.4	4473.1	4308.9	4234.3	4326.4
CAFS_HM_T_00006990	5214.9	5055.1	5072.8	5376.2	5553	5486	6618.9	6511.3	6574.5
CAFS_HM_T_00073316	4033.8	4064	4303.3	4101.7	4085.4	4530.9	5005.1	5178.9	5195.4
CAFS_HM_T_00080256	3748.5	3870.7	4073.7	4176.4	4320.8	4461.8	4006.3	4331.5	4072.6
CAFS_HM_T_00069616	2897	2939.8	2916.4	2889.7	3002.7	3010.5	2915.8	2875.1	2903.9
CAFS_HM_T_00079234	5339.2	5177.7	5304.6	5008.1	4734.4	5003.7	5466	5579.4	5798.2
CAFS_HM_T_00057814	3887.5	3747.2	3856.2	3700.5	3659.3	3692.9	3885.6	4066.6	3911.5
CAFS_HM_T_00077687	3934.8	3797.3	4028.1	4299.5	4177.6	4234.5	5041.1	4992.8	4800.4
CAFS_HM_T_00026905	4150.1	4175.2	4272.4	3831.8	3968.6	3862.6	4005.6	4069.2	4120
CAFS_HM_T_00041762	3632.6	3601.6	3579.5	3701.1	3745.4	3740.5	3635.2	3744.3	3677.7
CAFS_HM_T_00026579	3863.2	3792.7	3981.2	3769.3	3775.6	3920.2	4088.3	4230.3	4211.4
CAFS_HM_T_00026816	5145.4	5191.4	5235.2	5350.5	5160.1	5390.7	5428.5	5513.7	5474
CAFS_HM_T_00019364	4545.5	4721.4	4380.8	2770.7	4764.8	2070.3	1482.4	1436.4	1314.7
CAFS_HM_T_00036942	4478.1	4434.5	4387.1	4299.3	4410.3	4329.2	4296	4294.7	4338.7
CAFS_HM_T_00091213	6764.4	6837.3	6890	7435.1	6899.9	7396.2	7714.3	7606	7899.1
CAFS_HM_T_00069422	6406.3	6306.8	6479.6	6497.7	6207.3	6392.9	6831.9	6538.6	6691.1
CAFS_HM_T_00057141	4080	4180.6	4194.2	4007.5	4045.2	4155	4050.4	4084.8	4042.2
CAFS_HM_T_00019304	4362.2	4324.4	4305.5	4399.4	4509.9	4307	4663.3	4505	4449.7
CAFS_HM_T_00062089	4770	4718.8	4777.1	4835.1	4715.8	5022.4	5499.3	5452.7	5525.3
CAFS_HM_T_00065807	4872.2	5072.4	5028.2	5086.4	5258.3	4941.2	4513.6	4512.1	4302.6
CAFS_HM_T_00008618	2721.1	2733.3	2747.2	2501.1	2531	2502.2	2813	2742.3	2795.1
CAFS_HM_T_00091900	509.4	535.3	492.7	544.6	542.3	529.9	494.1	540.7	458.7
CAFS_HM_T_00042861	4500.9	4503.1	4386.1	4586	4619.6	4865.2	4621.3	4781.9	4589.9
CAFS_HM_T_00084561	5363.4	5194.9	5161.8	5232.1	5185.3	5211.1	5476.5	5393	5359.4
CAFS_HM_T_00054643	3975.1	4003.8	3918.7	4208.7	4238.8	4226.8	4148.5	4094.2	4027.2
CAFS_HM_T_00081974	6057.6	5880.2	6043.3	6116.4	6202.7	6319.9	6536.6	6267.9	6357.4
CAFS_HM_T_00051346	4684	4667	4754.9	5238.8	5209.5	5359.6	5289.4	5134.2	5018.3
CAFS_HM_T_00029911	5445.8	5395.7	5317	5643.1	5617.2	5611.2	5863.4	5846	5839.7
CAFS_HM_T_00076677	2627	2613.5	2527	2135.5	2677.8	1841.9	1570.3	1581.8	1568.8
CAFS_HM_T_00028007	6134.1	6053.5	5970.7	5437.9	5911	5327.1	4924.6	4990.7	4874.6
CAFS_HM_T_00027846	4509.4	4412.4	4338.1	4338.3	4379.4	4320.7	4481.3	4456.2	4416.4
CAFS_HM_T_00074958	8821	8466.6	8786.9	8695.2	8633.4	8745.8	9140.4	8916.2	9294.6
CAFS_HM_T_00011616	6289.5	6340.5	6214	6157.9	6172.5	6158.5	6045.6	6291.9	6105.9
CAFS_HM_T_00040130	5113.8	4908.8	5010.4	4731.3	4609.9	4567.8	3671	3663.9	3575.4
CAFS_HM_T_00029544	2290.3	2293.5	2342.9	2325.7	2399.2	2406.2	2558.4	2518.5	2563
CAFS_HM_T_00090685	4000.4	3996.1	3949.9	4058.5	4109.4	4174.9	4325.6	4324.1	4371
CAFS_HM_T_00005943	5814.5	5682.4	5459.1	6044	6100	6213.6	6391.9	5969.7	6202.4
CAFS_HM_T_00004557	2384.3	2273.3	2364.9	2207.8	2270.9	2271.7	2266.7	2373.6	2309
CAFS_HM_T_00007967	1268.3	1280.7	1360.9	1285.7	1279	1291.9	1368.1	1317.8	1359.1
CAFS_HM_T_00041167	3822.7	3771.8	3787.4	3872	4035.2	3983	4041.6	4039.1	4134
CAFS_HM_T_00054675	4212.4	4130.6	4247.5	4323.6	4152.7	4447.3	4603.6	4737.4	4690.6
CAFS_HM_T_00074762	3616.1	3664	3627.7	3761.4	3722.5	3758.1	3857.1	3807.5	3819.8
CAFS_HM_T_00016582	3161.7	3351.1	3195.4	3249.3	3173.4	3234.9	3298.6	3307.3	3344
CAFS_HM_T_00048841	4377	4514.3	4409.6	4472.9	4590.5	4619.3	4747	4767.7	4630.7
CAFS_HM_T_00023145	5023.5	4770.6	4966.2	4717.8	4907.3	4938.5	5287.9	5091.5	5338
CAFS_HM_T_00077024	427.1	428.9	401.2	403.8	392.8	364.4	342.3	347.9	329.2
CAFS_HM_T_00019317	4112.5	4018.4	4169.9	4255.6	4128.4	4377.7	4567.6	4534.4	4619.1
CAFS_HM_T_00003676	3712	3653.7	3519.7	3027.9	3551.3	2945.2	2684.6	2697.9	2667.1
CAFS_HM_T_00077011	5235.7	5215.6	5309	4938.9	5093.4	4959.7	5112.5	5116.8	4960.5
CAFS_HM_T_00069561	2115.7	2004	1984.6	2102.5	2166.8	2158.3	2213.5	2024.9	2109.4
CAFS_HM_T_00011576	5222.8	5071.4	5309.3	5462.7	5370.5	5244.2	5792.2	5585.5	5440.4
CAFS_HM_T_00081148	3977.9	4024.9	4119.4	4198.7	4091.6	4296.5	4543	4493.4	4638.1
CAFS_HM_T_00021736	7368.8	7332.5	7253.7	7239.5	7372.3	7501.3	7221.4	7503.2	7240.1
CAFS_HM_T_00008491	3387.6	3368	3522	3362.1	3212	3589.7	3501.9	3498.9	3594
CAFS_HM_T_00051077	3430.2	3363.4	3335.3	3244	3247.5	3098.6	2697.8	2762.6	2729.6
CAFS_HM_T_00088094	3386.2	3448.8	3360.7	3385.4	3384.1	3518.6	3292.6	3365.8	3374.8
CAFS_HM_T_00062063	7028.7	7113.5	7265.3	6430.4	6221.4	5509.1	4027.9	4261	4114.5
CAFS_HM_T_00013276	2277.9	2226.5	2258.3	2364	2307.5	2412.6	2433.5	2473.6	2462.5
CAFS_HM_T_00023138	5533.4	5585.3	5507.4	5671.9	5653.3	5743.1	5755	5900.5	5875.4
CAFS_HM_T_00034209	58.2	57	54.8	60.9	66.9	63.9	60.7	64.2	68.7
CAFS_HM_T_00026419	5776.9	5653.5	5794.5	5909.1	5683.9	6235.1	6447.4	6375.9	6221.6
CAFS_HM_T_00054687	6007.1	5781.9	5995.2	6037.5	5849	6189.6	6202.9	6320	6429.6
CAFS_HM_T_00013580	566.4	572.3	577.5	587.4	588.2	618.2	597.8	574.5	601.3
CAFS_HM_T_00008931	6486.1	6254.3	6403.3	6613	6711.1	7177.9	7193	7186.6	7232.5
CAFS_HM_T_00071518	4697	4621	4636	4562.5	4909.5	4804.9	4934.9	4863.9	4738.7
CAFS_HM_T_00085016	10285.3	10473.6	10280.2	11477.7	11230.6	10993.3	11792.7	11388.3	11136.1
CAFS_HM_T_00057886	5008.6	5131	4894.4	5257.5	4985	5026.8	5553.5	5360.3	5574.5
CAFS_HM_T_00079193	6980.6	6997.9	7248.6	6954	6976.6	7172.5	7303.9	7163.2	7394.1
CAFS_HM_T_00008960	4924.3	4980.4	4912.6	5010.4	4855.8	4974.1	5095.9	5089.6	5182.1
CAFS_HM_T_00049273	4602.2	4643.1	4519.9	4508.5	4577.3	4682	4630.8	4661	4600.3
CAFS_HM_T_00019105	4943.3	4790	4953	4836.2	4943.7	5114.6	5034.8	5095.2	5159.5
CAFS_HM_T_00049353	528.2	540.9	557.6	552	558.3	571.4	549.3	559	539.2
CAFS_HM_T_00047132	2123.8	2089.3	2307.3	2846.2	1797.4	1821.1	1067	1087.2	1065.2
CAFS_HM_T_00021130	4494.7	4272.5	4582.6	4832.3	4840.8	4993.4	4840.1	4957.1	4821.2
CAFS_HM_T_00079213	1221.9	1220.1	1233.9	1287.9	1298.1	1343.6	1353.5	1387.4	1374.3
CAFS_HM_T_00050183	4684.5	4505.2	4674.7	4827.7	4700.7	4869.8	4690.8	4646.7	4635
CAFS_HM_T_00069566	3860.3	3918	3984.3	4101	4180.6	4463.7	4689.5	4806.6	4668.9
CAFS_HM_T_00037961	4440.3	4482.3	4562.3	4635.1	4550.5	4645.1	4503.3	4630	4574.9
CAFS_HM_T_00084563	4722.7	4460.4	4757.1	5089.6	4383.4	4490.2	4217.9	4173.3	4195.9
CAFS_HM_T_00047068	5276.2	5365.8	5412.9	5328.1	5104.5	5748.2	5523.3	5332.5	5610.5
CAFS_HM_T_00012421	2960.2	2910.3	2919.7	2893.8	2924.3	2999.1	3000.6	3007.1	3076.5
CAFS_HM_T_00092375	3112.8	3171.2	3043.3	3136.1	3323.1	3171.1	2987.2	3088.5	3019.5
CAFS_HM_T_00077479	3314.3	3332.3	3316.2	3399.5	3391.9	3424.3	3516.6	3582.8	3517.2
CAFS_HM_T_00011702	3172.8	3113.1	3189.9	3187.7	3288	3413.4	3359.3	3296.3	3262.4
CAFS_HM_T_00082246	5183.9	5184.5	5163.3	5256	5156.3	5285	5260.3	5404.7	5260.5
CAFS_HM_T_00078506	6925.1	7323.4	6340.9	3974	7084	3267.1	2297.2	2199.8	2057.2
CAFS_HM_T_00018448	3114.1	3113.1	3283.1	3180.8	3175.5	3227	3477.4	3526	3576.4
CAFS_HM_T_00013460	5744.1	5517.3	5476.2	5412.4	5541.9	5555.1	5967.8	5512.1	5879.9
CAFS_HM_T_00043428	3300.5	3226.2	3254.8	3314.4	3348.8	3397.4	3654.4	3613.1	3614
CAFS_HM_T_00026047	3848.8	3897.4	3751.9	3381.1	3216.6	3304.9	3712.6	3813.7	3631.6
CAFS_HM_T_00060098	1734.9	1759.4	1827.7	1856.6	1772	1575.7	1773.5	1583.8	1656.3
CAFS_HM_T_00039442	882.4	868.1	893.4	877.1	836.4	883.5	863.9	854.4	895.2
CAFS_HM_T_00024062	4071.7	3907.8	4016.5	4263.9	4130.5	4107.8	4141.7	4060.9	4132.2
CAFS_HM_T_00053545	4204.4	4197.6	4222.5	4449.5	4518.5	4655.2	4583.8	4686	4638.6
CAFS_HM_T_00052904	5381.8	5617.5	5179.2	3673.6	3960.1	3547.3	3555.2	3543.3	3621.3
CAFS_HM_T_00067071	2839.8	2791.4	3275.8	2842.4	2855	3255.5	3072.5	2916.3	3163.5
CAFS_HM_T_00018366	3727	3614.8	3636.3	3587.8	3535.8	3498.3	3487.6	3524	3539.5
CAFS_HM_T_00016532	6532.2	6461.5	6516.8	6418.2	6465.6	6405.1	6416.2	6555.8	6597.3
CAFS_HM_T_00072456	5333.7	5321.1	5406.3	5507.1	5367.9	5613.4	5593.4	5633.8	5719.4
CAFS_HM_T_00024304	3582	3547.7	3810	3929.3	3715	4026.3	4091.2	4029.2	4145.4
CAFS_HM_T_00085115	4373.1	4252.9	4411.2	4411.6	4349.2	4509.8	4452.7	4485.4	4464.2
CAFS_HM_T_00061616	3939.7	3740.2	4197.3	5400.5	2925.4	2983.8	1494.4	1560.2	1588.1
CAFS_HM_T_00008157	833.5	826.2	883.4	754.4	708.4	725.2	838.5	840.9	795.2
CAFS_HM_T_00017895	4362.2	4425.1	4342.7	4055.9	4272.6	4110.3	3803.7	3928.2	3785.9
CAFS_HM_T_00017479	6208.5	6301.7	5936.6	5693	5773.6	4192.9	3402	3405.7	3394
CAFS_HM_T_00015174	3273.3	3188.6	3190.3	3418.9	3246.1	3341	3319.7	3361.1	3303.1
CAFS_HM_T_00071613	4390.8	4301.2	4525	4423.3	4157.1	4428.3	4460.4	4518.6	4612.8
CAFS_HM_T_00083214	3399.9	3344.8	3466.7	3668.2	3431.6	3758.2	3664.4	3527.2	3574.2
CAFS_HM_T_00002484	655.2	656.4	686.7	656.7	597.2	628.7	519.9	567.5	510.1
CAFS_HM_T_00065097	3181.6	3211.8	3191	3184	3171.2	3268	3297.8	3289.6	3191.7
CAFS_HM_T_00011977	3759.7	3694.7	3704.5	3787.5	3763.8	3861.6	3955	3980	4041.2
CAFS_HM_T_00084241	5833.1	5606.5	5903.3	6566.6	6143.4	6534.9	6388.6	6448.8	6306.9
CAFS_HM_T_00006976	2916.8	2902.7	2868.4	2995.4	2915.8	2961	3004.2	2940.3	2947.4
CAFS_HM_T_00063185	3727	3849.2	3633.3	4013	4337.3	4237.4	4237.6	4254.2	4260
CAFS_HM_T_00032670	3035.5	3035.4	3043.4	3078.9	3162.3	3094.1	3104.2	3122	3110.5
CAFS_HM_T_00071580	3752.9	3714.4	3795.6	4123.5	4056.5	4357.1	4256.9	4034	4145.7
CAFS_HM_T_00037469	7488.4	7427.6	7698.7	7820.4	7799.3	7962.6	8042.1	8037.7	8196.3
CAFS_HM_T_00051644	295.4	316	300.9	318.7	309.5	317.6	455.4	361.6	299.8
CAFS_HM_T_00001696	3351.4	3328.9	3323.9	3622.3	3373.5	3524.1	3686.8	3766.8	3698.6
CAFS_HM_T_00016133	26.2	26.5	29.6	23.3	26.3	27.3	22.8	29.2	31.9
CAFS_HM_T_00011903	5776.9	5690.1	5864.3	5742	6050.7	6056.9	6092.7	5994.7	5946.3
CAFS_HM_T_00075789	2811.7	2838.5	2796.5	2810.6	2851.9	2829.7	2871.3	2957.5	2822.9
CAFS_HM_T_00017817	3101.8	3185	3061.4	3300.1	3245.6	3141.4	3785.3	3788.6	3849.5
CAFS_HM_T_00078779	3816.1	3801	3987.6	4026.1	3997.3	4205.8	4032.2	4000.9	4130.2
CAFS_HM_T_00053179	6757.4	6551.8	7390.9	6526.1	6336.5	6941.3	6733.5	6868	7284.1
CAFS_HM_T_00086794	3646.6	3593.9	3536.5	3739.6	3832.3	3840	3910	3861.7	3859.7
CAFS_HM_T_00085144	4294.2	4140	4207.6	4014	4033.9	4058.7	4272.2	4375.2	4334.9
CAFS_HM_T_00009409	4532.7	4464.1	4365.4	4609.6	4467.1	4765.1	4752.4	4637.5	4736.5
CAFS_HM_T_00069658	4473.3	4476.9	4442.1	3607.4	4010.9	3157.8	2646	2633.9	2584.4
CAFS_HM_T_00051499	4581.4	4484.7	4414.7	4555.5	4555.1	4467.7	4575.9	4528.3	4583.3
CAFS_HM_T_00051946	3203.3	3268.2	3252.9	4137.5	3627.1	3773.5	3890.4	4135.4	4003.7
CAFS_HM_T_00008161	1178.2	1108.1	1198.3	1128.9	1111.2	1182.8	1490.9	1465.5	1473
CAFS_HM_T_00004330	2217.5	2207.9	2215.5	2369.1	2330.2	2463.2	2483.9	2505.9	2447.1
CAFS_HM_T_00014740	2026.9	2099.3	2097.8	2105.5	2104.4	2133.1	2142.1	2089.3	2092.5
CAFS_HM_T_00060246	4764.1	4782.8	4633.2	4268.4	4404.4	4187.2	3898.5	3752.6	3888.4
CAFS_HM_T_00000241	8463.6	9304.7	7429.3	4018.3	5799	2615.3	1778.1	1730.8	1615.6
CAFS_HM_T_00020686	6982.6	6927.2	7007.9	7004.7	6891.7	6980.8	7016.4	7092.2	7003
CAFS_HM_T_00023350	3626.2	3607.3	3630.9	3471.5	3508.9	3607.1	3759.4	3860.3	3825.8
CAFS_HM_T_00035741	3760.9	3617.8	3644.6	3020.8	2951.7	3085.4	3069.9	3075.9	3076.1
CAFS_HM_T_00046608	2865.7	2890.5	2842.4	2930.5	2844.6	3072.1	2983.4	3096.7	3015.3
CAFS_HM_T_00069991	2988.5	3105.1	3038.6	3078.1	3150.8	3007.6	3031	3037.2	3037.9
CAFS_HM_T_00085825	4662.2	4556.7	4580.6	4637.4	4616.8	4779.1	4634.9	4668.9	4523.7
CAFS_HM_T_00011847	1327.8	1342.9	1383	1392.5	1379	1468.2	1419.5	1430.5	1411.8
CAFS_HM_T_00007088	4505.6	4707.9	4437.9	4560.5	4483.7	4536.7	4643	4657	4679.5
CAFS_HM_T_00084054	1615.5	1616	1645	1701.8	1718.6	1704.6	1753.7	1807.5	1747.3
CAFS_HM_T_00041965	1506.4	1449.4	1483	1506.2	1552.2	1542	1615.1	1615.6	1627
CAFS_HM_T_00083067	4735.1	4698.4	4644.4	5129.6	4425.2	4560.5	5227.4	4920.6	5060.7
CAFS_HM_T_00033022	3261.8	3133.1	3115.6	3464.4	3277.9	3269.1	3679	3553.3	3618.7
CAFS_HM_T_00013037	3232.1	3156.5	3079.4	3053.7	3149.5	3058.8	3078.5	3019.5	3066.4
CAFS_HM_T_00080722	4544.1	4423.1	4464.9	4738.5	4474	4803.6	5193.1	5233.1	5189.5
CAFS_HM_T_00043054	3397.1	3287.1	3432	3473.6	3439.4	3483.4	3661.7	3867.5	3742.7
CAFS_HM_T_00086699	4991.4	4941.3	5038	5187.2	5076.1	5291.6	5624.4	5452.5	5789.2
CAFS_HM_T_00031822	4502.3	4357.3	4574	4275.3	4355.9	4594.3	4756.9	4898.2	5032.7
CAFS_HM_T_00069393	2863.9	2570.8	2778.6	3026.9	2722.7	2905.2	2751.4	2618	2761.7
CAFS_HM_T_00057231	1650.3	1733.7	1728.2	1813.1	3311.5	2893.1	2060.4	2243.1	1814.2
CAFS_HM_T_00018725	5863.3	5839.9	5832.2	6040.2	5957.1	6172.3	6163.5	6154.8	6146.1
CAFS_HM_T_00076349	3437	3516.4	3487.7	3617.9	3587.2	3584.1	3534.7	3514.8	3617.2
CAFS_HM_T_00020202	4182.7	4154.3	4276.8	4188.6	4267.2	4424.7	4453.6	4479	4482.9
CAFS_HM_T_00061688	80.2	88.4	72.5	61	78.3	76.5	66.3	70.7	62
CAFS_HM_T_00056573	4716.1	4634.2	4824.6	4730.8	4757.1	4845.9	4963.9	5076.1	5057.8
CAFS_HM_T_00013316	726.7	681.9	681	575.8	591.2	542.5	451.1	437.7	410.6
CAFS_HM_T_00013914	5089.7	5162.3	5094.6	4735.1	4873.6	4420.4	4101	4164	4075
CAFS_HM_T_00059190	370.2	351.5	342.1	339.4	347.9	325.7	368.7	319.7	314.4
CAFS_HM_T_00015899	3294.8	3219.5	3268.8	3413.8	3329.6	3438.8	3729.7	3647.7	3618.4
CAFS_HM_T_00022101	5786	5668	6067.1	5567.4	5391.9	5689	5546.5	5963	5861.1
CAFS_HM_T_00004114	1080.9	1125.1	1060.2	1308.3	1365.5	1275.5	1106	1158.1	1061
CAFS_HM_T_00059461	3958.3	3859.8	3910.6	3991.5	3871.2	3996.5	4008	3916.5	3988.1
CAFS_HM_T_00070526	7236.8	7422.4	7411	7622.9	7059.4	7432.6	8211.4	8328.6	8494.1
CAFS_HM_T_00003554	4270	4266.1	4338	4178.6	4223.5	4363.9	4374.8	4427	4505.4
CAFS_HM_T_00029546	760.5	774.7	798.9	782.3	809.8	771.2	815.5	822.8	810.2
CAFS_HM_T_00033128	1667.3	1743.6	1750.8	1662.4	1677.4	1815.3	1760.2	1853.7	1775.7
CAFS_HM_T_00016872	2038	2004.9	2041.6	2095.9	2165.9	2101.8	2270.4	2213.2	2313.8
CAFS_HM_T_00038844	5334.7	5405.2	5591.5	4184.9	3619.7	3617.8	3650.5	4063.5	3629.3
CAFS_HM_T_00061160	6323.4	6307.3	6259.7	6530.5	6360.4	6554.3	6771.1	6653.7	6748.7
CAFS_HM_T_00080803	3034.9	3042	3164.9	3318.3	3197.4	3388.3	3407.9	3378.4	3583.4
CAFS_HM_T_00081805	4197.5	4158.7	4133	4475.7	4334.7	4400.1	4492.5	4436.9	4414.5
CAFS_HM_T_00069881	4736.5	4633.3	4499.1	4765.9	4619	4895.9	5110.5	4951.1	5099.8
CAFS_HM_T_00080766	436.6	422.4	400.6	363.4	402.6	341.3	318.2	307.5	305.3
CAFS_HM_T_00036832	4218.3	4388.8	4254.9	5484.6	4590.4	4896.9	4102.6	4373	4110.5
CAFS_HM_T_00021256	5046.9	5005.6	4989.2	5030	5128.4	5096.3	5485.7	5440.3	5351.8
CAFS_HM_T_00046251	5052	5006.7	5014.5	4852.1	4931.6	5004.1	5051.5	5057.5	5053.7
CAFS_HM_T_00056859	3050.3	3056.4	3122	3064.8	3203.5	3220	3160.7	3169	3234.4
CAFS_HM_T_00020940	4196.1	4108.8	4192.1	4133.3	4079.3	3730.3	3368.4	3350.5	3197
CAFS_HM_T_00018477	4313.8	4304.3	4415.6	4111.7	4232.1	4336.4	4273.1	4192.8	4281.4
CAFS_HM_T_00035945	4055	3988.8	3912.7	3871.5	3986.6	4061.8	4298.8	4311.7	4361
CAFS_HM_T_00023185	3641.8	3765.9	3659.2	3761	3728.9	3934.4	3688.1	3807.5	3809.8
CAFS_HM_T_00029706	2630.7	2602.8	2596	2557.2	2562.3	2524.4	2744.3	2512.7	2670.1
CAFS_HM_T_00056710	2818.3	2842.6	2804.2	2998.7	2887.7	2957.7	2993.3	3000.7	3015.7
CAFS_HM_T_00059330	3967.8	4112.7	4079.9	4351.2	4241	4147.5	3922.9	3974.8	3857.7
CAFS_HM_T_00055287	2425.4	2315.9	2487.5	2379.7	2424.9	2541.6	2548.9	2596.4	2585.8
CAFS_HM_T_00076681	1934.8	2058.1	2065	2150.8	2129	2075.6	2303.1	2344	2210.3
CAFS_HM_T_00035312	2948.4	2794.9	2889.6	2916.8	2803.9	2911.9	3097	2867.5	2973.3
CAFS_HM_T_00023628	3232.2	3119.1	3177.7	3383.8	3242.6	3480.7	3723.1	3619.1	3872.7
CAFS_HM_T_00040628	5351.9	5329.3	5297.1	5485	5505.3	5561	5577.5	5674.3	5525.8
CAFS_HM_T_00034784	4930.5	4886.1	5171.6	4838.6	4967.8	4987.9	4993.8	4849.9	5070.2
CAFS_HM_T_00075449	6301.3	6069.2	6557.8	6365.2	6392.9	6836.7	7488	6982.6	7400.9
CAFS_HM_T_00054075	112.5	101.9	102.7	103.6	100.7	84.8	95.3	101.6	95.6
CAFS_HM_T_00090368	3370	3276.2	3335	3730.5	3625.9	3727.1	3811.2	3817.4	3739.6
CAFS_HM_T_00055016	2629	2575.8	2663.5	2659.7	2679.4	2635.1	2709.5	2766.7	2686.2
CAFS_HM_T_00089874	3501	3523.7	3458	3958	4048.2	3950.5	3983.6	3979.8	4035.2
CAFS_HM_T_00026258	3090.4	3119.8	3077.1	3099.8	3133.1	3209.6	3093.1	3189	3165
CAFS_HM_T_00008768	4317.5	4415	4252.9	4066.2	4117.3	4005	3917.5	4042	3928.6
CAFS_HM_T_00044087	633.7	613.9	653.8	647.6	621.6	674.7	636.7	661.7	664.7
CAFS_HM_T_00068186	4186.3	4282.7	4284	4425.4	4430.3	4636.1	4621.6	4717.6	4598
CAFS_HM_T_00052127	4804.9	4767.5	4888.7	4991.9	4813.3	5395	5289	5354.5	5442.7
CAFS_HM_T_00057974	4826.3	4560.4	4796.2	4775.8	4923.1	4968.3	5378	5098.7	5266.5
CAFS_HM_T_00030647	641.1	667.9	672.3	664.7	672.5	688.3	690	656.4	662.4
CAFS_HM_T_00005452	3450.9	3354.2	3371.7	3469.3	3420.5	3461	3483.5	3582.1	3617.3
CAFS_HM_T_00024454	3770.1	3648.4	3655.6	3468.1	3410.4	3344.1	3042.2	3106.5	3039.2
CAFS_HM_T_00049694	4657.5	4556.2	4576.2	4804.7	4782	4919.3	5089.6	5076	4916.1
CAFS_HM_T_00034200	2293.3	2281.3	2112.1	2242.8	2288.3	2190.6	2274.8	2216	2157.7
CAFS_HM_T_00024976	4810.8	4761.9	4736.7	5099.8	4945.1	5192	5327	5553.6	5395.2
CAFS_HM_T_00026091	5564.1	5421	5485.8	5400.6	5348.8	5530	5954.7	5787.9	5941.4
CAFS_HM_T_00062017	1251.6	1237.2	1210.8	1258.9	1236.7	1236.1	1217.4	1264.1	1195.1
CAFS_HM_T_00019253	3447.8	3375.4	3497.2	3386.7	3364.3	3537.6	3522.6	3583.3	3634
CAFS_HM_T_00071329	2780.7	2676.1	2713.9	3013.6	2907.1	2938.5	2919	2971.2	2945.9
CAFS_HM_T_00029352	2960.7	2986.6	3028	3010.7	3037.3	3140.1	3137.5	3227.5	3108
CAFS_HM_T_00075796	3383.6	3502.7	3247.6	3176.1	3253.1	2822.1	2542	2720.8	2517.1
CAFS_HM_T_00020711	4975.4	4994	5051	5058.8	5038.1	5120.4	5121.9	5237.9	5190.9
CAFS_HM_T_00054386	3505.5	3670.3	3505.3	3699.9	3617.1	3649.5	3651.8	3734.1	3784.4
CAFS_HM_T_00051731	2739.8	2685.1	2754.7	2655.6	2752.9	2766.9	2801.2	2788.1	2805.1
CAFS_HM_T_00073474	3004.7	2937.6	2961.2	3141.8	3102.3	3265	3115.1	3170.5	3128.3
CAFS_HM_T_00009327	2303.6	2247.9	2350.7	2354.5	2406	2556.5	2446.4	2467.6	2572.8
CAFS_HM_T_00036307	4105.3	4066.2	4620.8	4961.9	4710.7	4981.1	5119.2	4892.3	5069.2
CAFS_HM_T_00006369	679.3	668.3	727.1	675.5	689.4	708	683.4	690.5	726.5
CAFS_HM_T_00067327	541.2	515.9	529.6	493.6	514.7	511.5	487.9	466.4	497.1
CAFS_HM_T_00069428	3721.7	3711.6	3775.6	3757.5	3790	3744.6	3825.3	3856.3	3974.1
CAFS_HM_T_00007071	4281.2	4418.3	4128.3	3084.8	4314.9	2710.1	2232.7	2230.2	2101.9
CAFS_HM_T_00029577	4124.9	4174.1	4188.3	4446.3	4279.2	4418.8	4350	4383.7	4434.5
CAFS_HM_T_00021812	1936.4	1959.1	1958.6	2113.1	2063.3	2064.2	2007	2026.2	2065.3
CAFS_HM_T_00046845	2684.4	2665.8	2684.4	2782.5	2764.4	2719.4	2755.2	2759.2	2783.2
CAFS_HM_T_00009206	3905.6	3932.2	3952.4	3727	4034.8	3737.6	3478.8	3650.5	3488.9
CAFS_HM_T_00016637	3400.4	3343.3	3303.2	3358.3	3464.3	3374	3443.9	3380.1	3392.9
CAFS_HM_T_00072048	2806.6	2688.9	2892.7	2808.5	2795.1	2968.7	2838.8	2742.8	2723.1
CAFS_HM_T_00078103	7502.3	7320.6	7572.8	8849.7	8068.7	8976.4	8419.1	8121.2	8021.8
CAFS_HM_T_00002200	2835.5	2907.5	2957.7	2911.7	2956.4	3030.1	2860.1	2829.8	2844.4
CAFS_HM_T_00072192	2589	2559.2	2477.1	2477.1	2553.5	2377.3	2420.9	2372.3	2387.3
CAFS_HM_T_00033135	5640.8	5740.6	5669.3	5165.8	5240.5	5160.5	5083.5	5120.4	5132.8
CAFS_HM_T_00023055	2143.1	2081.3	2047.7	2230.1	2148.5	2219.2	2351.2	2136	2185.6
CAFS_HM_T_00000544	1474.4	1650.6	1486.4	1555.8	1541.7	1558	1505.5	1507.6	1643.7
CAFS_HM_T_00032155	3850.2	3920.7	3863	4060.9	4077.2	4063.3	4236.9	4272	4153.1
CAFS_HM_T_00009751	3424.2	3445.8	3545.1	3630.2	3587.3	3845.6	4054	3926.5	4156.4
CAFS_HM_T_00054211	3059.5	3095.6	3053.5	3048.1	3121.4	3153.4	3089.6	3187.8	3187.3
CAFS_HM_T_00001865	5083.8	5003.6	4935.1	5067.9	5051.3	5090.8	5211.9	5252.7	5132
CAFS_HM_T_00029757	3199	3267.3	3301.3	3105	3273.3	3287.7	3288	3623.4	3380.9
CAFS_HM_T_00022484	3773.5	3832.3	3742.9	3969.1	3841.6	4035.7	3990.5	4025.1	3942.3
CAFS_HM_T_00027955	20296.9	20783.4	21429.3	22613.1	20810.9	22477	22351.2	21443.2	22460.3
CAFS_HM_T_00024372	4296.9	4343.8	4338	4577.1	4516	4756.4	4836.7	4889.9	4783.2
CAFS_HM_T_00021265	3776.7	3798	3573.3	3683.3	3675.5	3247.2	2896.2	2937.8	2957
CAFS_HM_T_00086332	6178.7	5995.9	6190.2	6448.5	6538.4	6888.1	7186.5	6971.2	7381.6
CAFS_HM_T_00009902	3172.2	3216	3138.6	3078.6	2975.3	2973.4	2969.4	2983.2	2940.4
CAFS_HM_T_00006758	3699	3756.5	3971.4	3972.9	4051.4	4209.2	4130.6	4222.9	4224.1
CAFS_HM_T_00045148	3930.7	4048	3951.9	3985.1	4053.8	3939.5	3967.4	3895.8	4016.7
CAFS_HM_T_00018392	4129.5	4162.8	4222.2	4389.9	4443.5	4493.3	4480.3	4502.4	4516.9
CAFS_HM_T_00077329	3039.8	2953.8	3070.8	3125	3113	3152	3291.8	3362.2	3315.9
CAFS_HM_T_00060041	3233.5	3177.6	3096.9	2973.8	2864.4	2949.8	2634.6	2670.3	2687.4
CAFS_HM_T_00029501	4216.4	4173.3	4386.2	4399.3	4515.7	4585.3	4563.7	4805.6	4475.9
CAFS_HM_T_00027127	5822.4	5725.8	6000.2	6056.6	6152.1	6396	6636.7	6713.9	6862.1
CAFS_HM_T_00020070	1629.6	1680.1	1617.4	1698.7	1687.5	1778.1	1726.8	1851.4	1795.3
CAFS_HM_T_00021331	2978.3	2911.5	2861.3	2932.6	2662.2	2684	2615.9	2674.6	2739.3
CAFS_HM_T_00072000	642.2	648.6	698.1	793	753.5	771.1	690.9	680.1	659.5
CAFS_HM_T_00069966	1374.3	1400.3	1417.7	1466	1480.8	1510.6	1507.2	1515.1	1492.3
CAFS_HM_T_00059317	4063.2	3969.6	3692.5	4258.8	4183.4	4125.9	4560.2	4307.2	4386.4
CAFS_HM_T_00040451	1646.8	1637.9	1651.9	1609.1	1749	1765.4	1739.9	1709.4	1722.9
CAFS_HM_T_00062281	3465.7	3400.2	3413.4	3406.5	3478.2	3290.5	3195.6	3271.8	3218
CAFS_HM_T_00090195	852.5	850	826.3	872.8	844.6	866	853.5	870.3	903
CAFS_HM_T_00052540	4540	4419.7	4699.8	4585.9	4514.1	4734.1	4775.5	4704.9	4789.1
CAFS_HM_T_00060614	3157.3	3090.3	3067.1	3092.3	3064.9	2993.9	3151.2	3116	3079.4
CAFS_HM_T_00067443	4255.2	4067.1	4215.8	4749.1	4509.5	4752.6	4747.5	4527.6	4506.9
CAFS_HM_T_00079714	2828.4	2854.7	2867	2793.6	2915.5	3014	2995.9	2936.3	3023.7
CAFS_HM_T_00090003	5560.1	5575.6	5418.6	5322.7	5270.5	5214.4	5277.9	5165.8	5165.9
CAFS_HM_T_00051558	3791.9	3781	3767.9	4001.3	3936.9	4011	4103.5	4015.6	4002.4
CAFS_HM_T_00070004	3301.3	3505.3	3341.2	3478.8	3351.3	3216.9	3080.1	3038.1	3041.2
CAFS_HM_T_00025707	3696.3	3662.9	3732.3	3518.8	3602.8	3603	3585.8	3627.5	3542.4
CAFS_HM_T_00004853	5622.5	5605.3	5826	5828.1	5922.6	6009.3	6455.8	6292.7	6515.3
CAFS_HM_T_00021922	4002.9	3915.3	4175.7	3841.1	3937.4	3972.7	4090.1	4081.1	4101.4
CAFS_HM_T_00054414	4840.5	4792.6	4682.6	4832.9	4656.4	4643.9	4851.9	4895	4802.8
CAFS_HM_T_00043664	3256	3192.9	3239.6	3292.5	3360.8	3438.7	3521.6	3452.2	3449.9
CAFS_HM_T_00085566	1074.9	1050.9	1055	1007.2	1076.8	1016.9	1038	1050.2	1052.7
CAFS_HM_T_00048208	3542.1	3479.5	3563.7	3433.9	3380.1	3396.2	3546.2	3561.5	3638.2
CAFS_HM_T_00019699	1634.8	1630.5	1676.2	1570.9	1690.7	1601.2	1594.3	1575.2	1589.6
CAFS_HM_T_00015969	2859.1	2941.1	2810.8	3097.3	3313.2	3217.1	3327.6	3344.1	3247.7
CAFS_HM_T_00045756	2887.9	2905.7	2988.2	3100.1	3014.3	3176.1	2985.1	3051.1	3078
CAFS_HM_T_00081146	877.5	864.1	823.5	829.5	842.2	702.5	677.6	653.1	662.9
CAFS_HM_T_00000376	3265.9	3203.4	3316.5	3081.7	2998.1	3133.1	3066.7	3189.6	3078.1
CAFS_HM_T_00063839	5262.6	5204.2	5041.8	5342.2	5320.5	5334.4	5536.8	5426.6	5382.8
CAFS_HM_T_00038801	481.1	472.6	466	450.9	431.9	468.8	457.9	472.7	498.2
CAFS_HM_T_00042759	4149.6	4198	4066.5	4160	4406.5	4134.3	4075.9	3890.1	3729.6
CAFS_HM_T_00062201	4662.5	4532.4	4479.4	4271.7	4347.7	4148.9	4433.4	4335.8	4359.4
CAFS_HM_T_00066067	3354.8	3292.8	3372.4	3788.5	4390.3	4322.7	4808.6	4722.4	4846.4
CAFS_HM_T_00060161	5858.6	5849.5	5964	6099.6	6028	6223	6345.3	6259.6	6184
CAFS_HM_T_00088954	2828.5	2679.7	2825.8	2286.9	2513.2	2314.3	2217.2	2171.2	2293.3
CAFS_HM_T_00033503	4221.6	4007.8	4216	4289.8	4342	4539.8	4545.4	4596	4547.3
CAFS_HM_T_00077233	2972	2968.6	2872	2909.7	2846.4	2875.1	3021.6	2991.4	3059.8
CAFS_HM_T_00033619	4986.1	5361.9	4896.1	4830.7	4869	4714.4	4576.1	4491.3	4543.5
CAFS_HM_T_00089457	5011.2	4893	4844.7	4569	4456.8	4430.6	4975.5	4959.7	5037.9
CAFS_HM_T_00078069	2589.6	2613.3	2645.1	2699.5	2810.6	2749.2	2685.5	2726.7	2709.8
CAFS_HM_T_00074163	2640.8	2606.7	2572.3	2742	2708.1	2757.9	2712.8	2716.8	2778.4
CAFS_HM_T_00010304	2654.7	2680.8	2729.6	2725.1	2778	2928.1	2897.1	2980.6	3012.1
CAFS_HM_T_00079621	3095.2	3069.7	3065.9	2946.2	2992.8	3075.3	3059.7	3109.2	2948.8
CAFS_HM_T_00087635	3965.9	4015.2	3874.6	3880.6	3892.9	3853	3767.4	3897.7	3802.4
CAFS_HM_T_00015619	1210.7	1206.6	1211.8	1285.8	1292	1328	1342.2	1330.5	1365.8
CAFS_HM_T_00083396	3021.8	2911.5	3086.7	3486.6	3289.6	3538.3	3657.1	3620.8	3633.2
CAFS_HM_T_00055315	3105.6	3144.3	2973.1	2063.4	1632.9	1617.8	1429.1	1446	1442.4
CAFS_HM_T_00075842	3937.3	3995.3	3950	4087.9	4292.5	4138	4330.1	4280.3	4235.9
CAFS_HM_T_00011210	3938.3	3797.2	3930.2	4023.7	4102.8	4335.2	4491.4	4553.3	4439.2
CAFS_HM_T_00044586	3205.3	3165.5	3187.7	3123.4	3213.6	3438.8	3238.4	3459.6	3390
CAFS_HM_T_00072939	5225	5127.1	5223.4	5322.8	5264.5	5774.6	6096.7	6047.1	6050.3
CAFS_HM_T_00057848	4699.9	4690	4662	4697.8	4720.5	4752.2	4863.5	4897.8	4722.5
CAFS_HM_T_00054653	597.1	576.3	628	622.3	638.2	610.8	645.2	608	618.1
CAFS_HM_T_00049825	3735.8	3822.6	3678.9	3035.3	3743.7	2899.7	2674.6	2644.8	2658.1
CAFS_HM_T_00036407	2674.5	2691.9	2686.9	2730.9	2695	2888.7	2922.2	2867.8	2912.5
CAFS_HM_T_00050946	4050.9	3934.4	4075.6	3711.4	3964.1	3913.5	4259.6	4243.1	4152.9
CAFS_HM_T_00016082	4629.4	4522.5	4663.3	4794.2	4739.8	5106.7	5049.7	5200.3	5143.9
CAFS_HM_T_00054486	2788.7	2812.2	2781.6	3192.8	3163.3	3242.7	3521.3	3303.5	3420.7
CAFS_HM_T_00069169	55.7	66.9	65.4	68.3	67.7	85.1	72.6	77.2	73.4
CAFS_HM_T_00064077	3596.3	3558.3	3540.8	3043.9	2997.8	2828.6	2710.6	2845.5	2762
CAFS_HM_T_00007163	2246.8	2243.4	2175	2205.4	2573.8	2352.2	2171.3	2108.2	2150.5
CAFS_HM_T_00067097	849.7	844.8	835.8	1007.8	1142.4	1093.7	1154.6	1140.7	1115.2
CAFS_HM_T_00062420	3313.4	3315.5	3344.1	3441.1	3574.5	3563.9	3619.5	3682.2	3659.5
CAFS_HM_T_00046337	3264.5	3278.7	3440.1	3600.3	3586.4	3838.9	4115.3	4172.4	4362
CAFS_HM_T_00010579	3345.3	3254.9	3306.7	3400.8	3489	3902	3973.3	3706.9	4116.5
CAFS_HM_T_00042199	2091.4	2065	2138.8	2190.8	2179.9	2275.1	2197.2	2183.9	2257.1
CAFS_HM_T_00085525	284.5	261.3	261	255.2	279.7	271.4	252.1	242.4	259
CAFS_HM_T_00017820	1761.4	1744.7	1798.7	2053.8	2030	2035.4	2127.6	2167.4	2146.1
CAFS_HM_T_00085217	57	65.2	53	62.2	62.8	73.9	57.9	64.3	61.9
CAFS_HM_T_00062847	2622.1	2563	2478.6	2753.7	2843.5	2713.2	2833.5	2855.6	2791.6
CAFS_HM_T_00039346	1018	1052.3	954.5	973	952.4	884.4	931	943.2	929
CAFS_HM_T_00016265	3034.9	2962.9	3130.2	3061.1	3100.9	3287.4	3180.4	3062.1	3178.7
CAFS_HM_T_00037605	3381.4	3565.4	3403.2	3562.6	3577.5	3494.1	3273.4	3313.3	3344.6
CAFS_HM_T_00046853	3249.5	3153.4	3114.6	3263	3177	3241.2	3275.8	3253.1	3290.8
CAFS_HM_T_00080372	3485.5	3456.9	3467.5	3272.3	3458.5	3269.6	3168.7	3257.3	3179.3
CAFS_HM_T_00019858	141.9	148	157.3	148.5	147.9	170.3	157.7	167.1	159.8
CAFS_HM_T_00036302	2280.3	2267.8	2255.9	2199.5	2274.7	2268.3	2358	2255.7	2394.3
CAFS_HM_T_00000158	6319.4	6310.4	6536.4	6234.6	6257.5	6388.7	6398.5	6303.4	6506
CAFS_HM_T_00048488	2003.9	1778.5	1987.8	1835.7	1824.8	1823.9	1891	1903.1	1876.3
CAFS_HM_T_00054461	2499.4	2478.3	2474.8	2338.1	2528.7	2496.7	2498.2	2508.9	2460.8
CAFS_HM_T_00073258	3800.3	3698.7	3609.4	3827.2	3782.5	3924.2	3832.9	3953.3	3929.6
CAFS_HM_T_00076854	334.5	324.6	340.9	326.2	341.4	344.4	341.2	337.2	343.3
CAFS_HM_T_00078726	2986.7	2956.2	2910.7	3182.2	3122.1	3191.2	3155	3244.2	3285.1
CAFS_HM_T_00047267	285.3	280.9	289.6	302.4	309.7	315.1	271.2	279.6	266.3
CAFS_HM_T_00085009	2968.8	2967	2982.1	2827.6	2941.4	2967.1	2896.5	3060.9	2997.8
CAFS_HM_T_00088720	5113	5100.5	5053.1	5126.9	5235.4	5382.3	5373.6	5477.7	5389.3
CAFS_HM_T_00066920	3328.8	3260.6	3394.9	3588.8	3272.6	3563.8	3640.1	3524	3706.4
CAFS_HM_T_00070057	958.8	922.9	933.4	940.7	937.8	948.3	965.6	976.6	959.7
CAFS_HM_T_00084142	2055.8	2047.7	2064.1	2062.9	2082.2	2104.8	2101.8	2065.3	2060.6
CAFS_HM_T_00084904	4258.7	4248.4	4198.6	4424.9	4394.5	4394.1	4867	4980.3	4815.8
CAFS_HM_T_00086814	1887.3	1837.4	1835.9	1854.9	1709.4	1727.4	1804	1817.9	1809.7
CAFS_HM_T_00089892	4726	4728.1	4708.6	4677.8	4824.6	4951.3	4997.2	5234.3	5200.5
CAFS_HM_T_00075450	3449.9	3487.9	3581.7	3568.1	3495.6	3866.5	3609.3	3702.1	3650.1
CAFS_HM_T_00061570	2714.5	2747.1	2825.2	2915.2	2959.6	3067.6	2672.6	2660.6	2702.1
CAFS_HM_T_00016387	5186.4	5036	5324.9	5223	5103.4	5387.7	5457.1	5520.7	5524.3
CAFS_HM_T_00004178	1020	1027.4	1069.4	1047.2	987.5	1065.8	1071.1	1078.7	1059.7
CAFS_HM_T_00034176	4754.6	4825.5	4776.3	4420.2	4826.8	4899.5	4454.8	4774.1	4615.4
CAFS_HM_T_00013385	6273.1	6252.8	6178.5	6353.3	6338.1	6629.2	6651.7	6746.2	6695.8
CAFS_HM_T_00080729	4110.1	4023.3	4031.7	4114.5	4084.1	4130.7	4198.9	4220.6	4192.6
CAFS_HM_T_00076395	4843.8	4830.6	4907.3	5453.7	4654.5	5082.6	4983.1	4830.9	4661.3
CAFS_HM_T_00075486	3145.6	3040.3	3240.8	3143	3125.2	3191.9	3303	3364.7	3343.6
CAFS_HM_T_00070290	5179	5088.5	4986.1	5145.2	5069.7	5070	5246	5070.8	5191.1
CAFS_HM_T_00015738	3993.5	3851.5	3987.7	3969.2	3899.6	4105.9	4040.1	3957.6	4056.2
CAFS_HM_T_00078662	3113.1	3030.8	3068	3095.9	3099.4	3245	3739.7	3671.6	3801.3
CAFS_HM_T_00070898	4419.9	4261.7	4375	4440.5	4314.7	4407.9	4515.1	4490.8	4494.7
CAFS_HM_T_00036451	4357.6	4273.1	4253.5	4616.8	4429.2	4584.7	4680.2	4630.8	4695.6
CAFS_HM_T_00005385	1708.6	1734.6	1668	1601.8	1484.6	1510.6	1754.5	1671.5	1696.5
CAFS_HM_T_00064019	3445.1	3411.8	3412.4	3332.1	3444.9	3288.8	3193.6	3182.6	3192.8
CAFS_HM_T_00078916	2070.1	2009.1	2054	2025.6	1997.8	2139.9	2153	2132.2	2226.8
CAFS_HM_T_00064652	3042.8	3018.9	2929.7	3123.2	2881.6	2956.4	3249.9	3151.1	3165.9
CAFS_HM_T_00064650	2379.8	2293.7	2324.1	2468.8	2397.2	2540.1	2656.5	2669	2632.8
CAFS_HM_T_00026214	3815.9	3856.1	3766.8	3714.2	3775.4	3657.5	3920.7	3787.8	3830.7
CAFS_HM_T_00081621	3779.4	3609.6	3643.4	3614.8	3638.8	3782.7	3719.4	3782.3	3684.9
CAFS_HM_T_00041384	2675	2645.3	2777.5	2426.3	2432.9	2508.3	2487.6	2525.9	2538.4
CAFS_HM_T_00001446	3580.5	3519.8	3530.1	3950.8	3537.8	3469	3823	3854.2	3901.7
CAFS_HM_T_00038668	4661.6	4582.8	4765.8	4690.2	4688.2	4756.4	4933.5	4948.9	5005.6
CAFS_HM_T_00075113	1890.5	1772.3	1648.5	1934.2	1918.3	1794.7	2093.7	1812.3	2018.5
CAFS_HM_T_00083374	2922.8	2971.8	3064.4	3471.3	3222.7	3365.7	3306.6	3223.6	3159.2
CAFS_HM_T_00083083	2461.3	2457.8	2502.8	2401.6	2452.8	2467	2522.9	2417.1	2484.1
CAFS_HM_T_00006691	4193.1	4196.7	4216.2	4350.9	4229.8	4254.3	4413.1	4545.9	4434.9
CAFS_HM_T_00040808	1501.7	1524.2	1558	1478.4	1555.1	1549.1	1466.2	1541.5	1533.2
CAFS_HM_T_00040120	110.8	116.4	122.8	114.8	115.8	111	104.8	108.5	107.8
CAFS_HM_T_00034469	1012.8	1029.3	1077.3	993	1015.7	1073.8	1076.3	1008.2	1090.3
CAFS_HM_T_00010021	3617	3635.5	3554.4	3720	3615	3811.2	3889.7	3975.3	3903.6
CAFS_HM_T_00064354	7632.2	7363.2	7136.4	7403.3	7478.8	7115.4	7605.2	7165.5	7470.8
CAFS_HM_T_00084441	3693.8	3640.6	3916.6	4012.6	3903.9	4289.2	3999.3	4298.7	4134.2
CAFS_HM_T_00089903	1814	1826.5	1838.2	1944.7	1910.9	1957.3	1888.1	1978.2	1933.5
CAFS_HM_T_00042766	3313.3	3262.5	3339.6	3289.6	3358.9	3433.8	3562.8	3530.5	3624.4
CAFS_HM_T_00054805	4760.4	4647.3	4768.7	4449.1	4621.9	4426.9	4248.6	4345	4283.9
CAFS_HM_T_00013034	3663.7	3625.4	3666	3869	3832.8	3947.2	4038.8	4081.3	4029.1
CAFS_HM_T_00034948	724	718.9	739.9	768.8	772.7	776.2	786	831.5	809.3
CAFS_HM_T_00042301	1826.4	1810.5	1877.2	2033	2040.8	2132.6	2100.3	2166.6	2100.5
CAFS_HM_T_00046808	5213.4	5012.8	5356.9	5463.7	5296.9	5795.8	5912.1	5879.3	5907.8
CAFS_HM_T_00075465	1327.9	1264.1	1220.5	1276.7	1346.4	1278.2	1357.4	1302.8	1366.4
CAFS_HM_T_00080480	3868.9	3790.7	3819.7	3682.1	3695.3	3721	3766.9	3739.4	3714.2
CAFS_HM_T_00064907	6141.4	5946.4	6033.8	6071.5	6244.1	6304.2	6730.4	7123.7	6767.4
CAFS_HM_T_00012652	5159.9	5188.3	5339.1	6118.5	4833.1	5233.3	4561	4555.2	4648.2
CAFS_HM_T_00014677	3549.4	3492.9	3566.4	3762.3	3654.6	3757.9	3963.2	3967.7	3912.1
CAFS_HM_T_00019221	2786.4	2734	2699.5	2548	3055.8	2253.2	2073.1	2020.3	2060.5
CAFS_HM_T_00000185	6662.2	6476.2	6842.8	6266	6438	6546	6515.9	6804.7	6682.9
CAFS_HM_T_00058041	1137.1	1167.5	1094.9	1055	1054.5	970.2	802.9	830.1	824.8
CAFS_HM_T_00040368	5652.1	5894.1	5187.6	3692.5	5165.1	2904.8	2044.5	2089.2	1912.2
CAFS_HM_T_00010377	6969.1	6652.5	6854.5	7074	7119	7101	7559	7311.1	7373.3
CAFS_HM_T_00072570	2940.7	2962.7	2935.7	3023.2	2983.4	3099.6	3048.5	3174.7	3050.5
CAFS_HM_T_00057012	4788.6	4773.2	4642.7	4298	4580.9	4358	4241	4229.2	4238.2
CAFS_HM_T_00078759	3301.2	3242.8	3406.2	3304.9	3341.3	3483.6	3614.9	3650.1	3668.1
CAFS_HM_T_00077445	1057.4	1055	1051.3	1052.4	1073.6	1038.5	1057.4	1037.4	1045.3
CAFS_HM_T_00052996	3781.8	3676.4	3694.7	3656.8	3634.8	3672.9	3819.9	3900	3861.2
CAFS_HM_T_00038258	2836.4	2889.1	2780.2	2983.1	2877.2	2936.5	2870.6	3022.7	2916.9
CAFS_HM_T_00062620	3946.5	3989.8	3911.9	3972.4	4079.3	3928.5	3875.5	4022.2	3975.9
CAFS_HM_T_00046816	2496	2587.7	2537.5	2485.6	2565.7	2518.5	2589.9	2557.6	2579.6
CAFS_HM_T_00042487	2982.6	3008.1	2947.3	3138	3039.1	3095.9	3094.3	3245	3164.9
CAFS_HM_T_00011827	3812.9	3734.7	3766.5	4295.4	4257.7	4537.8	4183.2	4089.9	4118.7
CAFS_HM_T_00084823	3197.3	3060.7	3111.8	3187	3248.1	3405.2	3263.8	3170.1	3206
CAFS_HM_T_00085854	1409.8	1463.7	1445.8	1434.5	1468	1427.2	1469.1	1456.8	1497.6
CAFS_HM_T_00002793	491.8	442.5	468.7	431.8	449.3	464.8	493.1	451.3	498.9
CAFS_HM_T_00064560	3866.8	4109.5	3394.7	1900	2733.5	1392	1117.4	1114.4	1040.7
CAFS_HM_T_00034604	5561.4	5361.1	5403.2	5403	5543.7	5629.1	5494.8	5376.5	5404.7
CAFS_HM_T_00084791	4160.5	3960.1	4214.7	3596.7	3891.4	3760.4	3631.2	3677	3567.5
CAFS_HM_T_00053489	2365.8	2378.6	2405	2280.2	2400.8	2168	2096.8	2070	2131.3
CAFS_HM_T_00035629	2887.5	2866.1	2754.4	3065.9	2979.2	2941.3	3058.8	3155.5	3046.5
CAFS_HM_T_00055544	2232.8	2229.5	2240.4	2264.2	2276.4	2270.6	2344.8	2337.1	2366.1
CAFS_HM_T_00085019	4394.2	4494	4740.2	4529.4	4442.5	4664.4	4779.2	4918.4	4572.4
CAFS_HM_T_00078804	3295.7	3203.9	3405.9	3356.5	3441.5	3520.9	3513.3	3634.5	3570.8
CAFS_HM_T_00031271	2894.4	2925.2	2983.6	3077.8	2982.5	3243.6	3102.3	3149.5	3109.9
CAFS_HM_T_00033271	2682.9	2629.7	2615.6	2690.5	2704.3	2778.6	2829.2	2785.1	2817.3
CAFS_HM_T_00078090	2684.9	2623.7	2622.2	2687.7	2623.8	2626.8	2734	2691.3	2784.9
CAFS_HM_T_00021273	2772.9	2721	2738.9	2745.9	2738.2	2834.8	2777.6	2849.6	2897.6
CAFS_HM_T_00091649	3273.5	3280.8	3457.2	3412.5	3422.6	3801.7	3505	3597.7	3588.6
CAFS_HM_T_00047319	4528.9	4424	4651.7	4736.2	4960.8	5063.2	4744.6	4770	4757.3
CAFS_HM_T_00023042	2534.8	2444.8	2481.5	2491.6	2599.8	2578.7	2697.4	2637.5	2686
CAFS_HM_T_00048637	8.1	9.3	8.8	9	9	6.1	4.9	7.6	7.5
CAFS_HM_T_00063425	3161.6	3176.2	3170	3482.9	3345.2	3340.4	3356.3	3398.4	3340.8
CAFS_HM_T_00022741	3547.4	3530.1	3547.2	3259.2	3339.4	3350.1	3364.5	3279.4	3298.9
CAFS_HM_T_00021313	3963	3945.6	4002.4	3755.1	3942	3795.1	3664.1	3690.4	3607.9
CAFS_HM_T_00086072	4419.4	4389	4549.2	4410	4424	4514.1	4704.7	4681	4804.8
CAFS_HM_T_00030303	3633.8	3591.2	3212.9	2422	2726.1	2271.7	1563.4	1706.1	1447.1
CAFS_HM_T_00042664	3243.8	3210.5	3178.2	3371	3425.7	3374.9	3458.6	3451.9	3407.9
CAFS_HM_T_00030719	83.7	85.7	74.2	76.2	77.8	79.2	78.5	77.9	77.1
CAFS_HM_T_00066835	3159.4	3147.4	3065.3	3099.4	3112.9	3223	3183.6	3110.1	3077.5
CAFS_HM_T_00015571	4416.5	4376.6	4377	4430.6	4430.2	4668.2	4324.9	4360.2	4286.8
CAFS_HM_T_00064735	3616.7	3549.8	3726.5	3744.6	3573.8	3936.5	3758.4	3842.4	3789.4
CAFS_HM_T_00061583	1244.3	1264.6	1147.8	1246	1208	1210.5	1158.8	1123	1054
CAFS_HM_T_00035656	2357.5	2436.4	2467.2	2331.3	2323.8	2305.8	2354.6	2367.7	2355.8
CAFS_HM_T_00005959	4629.8	4552.9	4720.4	4400.7	4660.7	4431.7	4513.9	4379.2	4520.3
CAFS_HM_T_00010167	4996.6	4926.4	4839.6	4966.4	4840.2	4953	4748.8	4908.8	4949.9
CAFS_HM_T_00006426	3768.9	3758.9	3722.5	3650.3	3699.2	3582.6	3732.6	3777.6	3730.2
CAFS_HM_T_00026863	3323.7	3352.7	3283.9	3304	3325.4	3434.4	3444.7	3582.2	3602.4
CAFS_HM_T_00057696	5075.4	5111.6	4972.3	4527.8	4963.8	4407.6	4233.2	4247.6	4222.1
CAFS_HM_T_00090222	3189.9	3236.1	3098.6	2918.8	2956.9	2712.7	2649.8	2644.1	2598.3
CAFS_HM_T_00003342	1811.8	1844.9	1830.9	2015.1	1994.9	2107.2	1967	1927.9	2022.3
CAFS_HM_T_00091181	4404	4535.4	4319	4071.3	4597.7	3018.6	2472	2348.4	2278.6
CAFS_HM_T_00061552	4517.7	4451.6	4437.8	4650.9	4581.7	4633.7	4645.6	4496.7	4606.1
CAFS_HM_T_00044001	4454	4512.8	4495.3	4396.9	4657.8	4612.6	4355.8	4587.3	4416
CAFS_HM_T_00050342	5008.5	4971.3	5232.9	5294.1	5374.8	5470	5544.2	5569.4	5553.7
CAFS_HM_T_00059838	8049.2	8251.9	8149.7	8858.3	7926.5	8713.8	8339.3	8490.8	8553.2
CAFS_HM_T_00017701	4161.7	4128.1	4458.1	4100	4065.2	4426.3	4523.7	4447.5	4669.7
CAFS_HM_T_00055671	313.8	306.1	287.5	282.9	300.8	258.3	248.3	267.9	275.3
CAFS_HM_T_00006293	3582.8	3588.7	3476.3	3560.1	3618.8	3527.5	3346.7	3361.9	3340.4
CAFS_HM_T_00024315	770.2	783.5	754.3	703.9	746.4	675.2	605.5	632	580.4
CAFS_HM_T_00067401	2832	2722.1	2741.2	3003.2	2914.4	3017.2	3256.4	3222.4	3320.5
CAFS_HM_T_00049442	1604.8	1624	1656.7	1628.4	1643.9	1686.5	1578.8	1568.8	1612.6
CAFS_HM_T_00043530	3934.2	3852.6	3983.1	4012.5	3977.1	4092.9	4285.7	4368.7	4334.9
CAFS_HM_T_00017194	4312.1	4124.6	4009.6	3096.5	3560.1	3155.1	3226.8	3276.2	3182.1
CAFS_HM_T_00021542	2081.1	2101.6	2189	1406	1336.1	1430	2802.6	2704.9	2706.8
CAFS_HM_T_00082451	2129.6	2136	2229.9	2032.8	2077	2190.8	2108	2180.9	2131.4
CAFS_HM_T_00074511	3291.8	3289.9	3281.8	3241.2	3290.6	3216.4	3234.3	3211.4	3233
CAFS_HM_T_00017543	2515.2	2516	2534	2453.2	2473.2	2556.8	2492.3	2454.4	2537.9
CAFS_HM_T_00046281	361.5	354.5	372	519.7	377.5	376.6	1057.8	969	578.8
CAFS_HM_T_00010681	3834.1	3805.1	3747	3909.9	3866	3837	3942.6	3976.5	3998.4
CAFS_HM_T_00005877	3071.4	3080.7	2990.7	3002.9	3065.9	2963.7	2799.3	2818.4	2757.6
CAFS_HM_T_00007620	2785.5	2755.9	2775.3	3066.4	2859.6	3047.4	3078.6	3101.3	3102.6
CAFS_HM_T_00017438	3965.7	3872.9	3890.7	3847.5	4002.6	3803.7	3669.2	3706.1	3646.2
CAFS_HM_T_00005238	3640.5	3523.9	3548.2	3515.7	3392.9	3604.3	3865.6	3762.3	3765.8
CAFS_HM_T_00090492	1773.3	1870.4	1817.9	1832	1885.9	1885.8	1871.4	1866.3	1817.1
CAFS_HM_T_00048864	1219.8	1229.9	1248	1097.1	1197	1099.3	933.2	978.9	960.5
CAFS_HM_T_00015652	806.7	791.2	804.1	794.8	802.6	803.1	789.4	762.9	791.7
CAFS_HM_T_00041469	2919	2822	2918.9	2678.3	2901.4	2763.9	2761.5	2844.6	2914.5
CAFS_HM_T_00018609	3618.2	3568.3	3572.5	3341.7	3454.2	3438.1	3443.8	3421.6	3567.6
CAFS_HM_T_00028967	3128.7	2996.5	3116.6	3036	3172.5	3178.9	3207.2	3209	3304.6
CAFS_HM_T_00013419	2722.4	2745.8	2727.4	2652.9	2644.8	2576.8	2618.5	2531.2	2595.7
CAFS_HM_T_00063788	3324.2	3445.8	3360.4	3419.7	3223.8	3351.6	3193.4	3237.2	3154.9
CAFS_HM_T_00036138	5586.2	5923.3	5134.1	3269.4	4420.1	2186	1756.6	1723.2	1642.1
CAFS_HM_T_00049356	2495.9	2601.9	2614.8	2630.4	2590.2	2729.4	2586.4	2631	2613.3
CAFS_HM_T_00057694	3624.8	3537.9	3459.6	3633.4	3591.2	3694.1	3727.8	3856.5	3675.9
CAFS_HM_T_00050973	3592.3	3478.4	3477	3540.6	3491.7	3624.2	3713.6	3674.9	3730.6
CAFS_HM_T_00084171	1696.3	1770.3	1767.8	1788.7	1742.5	1900.1	1802.7	1829.7	1847.7
CAFS_HM_T_00020828	2979.9	3035.9	3069.7	3116.2	3032	3117.6	3200.7	3250.6	3415.3
CAFS_HM_T_00014748	1301.1	1254.5	1251.2	1246.6	1225.8	1307	1304.8	1311.1	1308.5
CAFS_HM_T_00045652	1811.3	1743.9	1885.2	1680	1749.3	1900.8	1834.1	1797.6	1902.3
CAFS_HM_T_00017826	2115.3	2108.4	2159	2220.9	2158	2252.7	2300	2331.6	2351.2
CAFS_HM_T_00090784	4149.1	4089.9	3993.6	3209.7	3630.3	2975.2	2692.1	2737.8	2740.3
CAFS_HM_T_00013500	3072.8	3087.9	2971.7	2985.8	3037.7	2992.5	3021.1	3127.6	2987.4
CAFS_HM_T_00021009	4835	4752.9	4796.8	4716	4714.4	4757.2	4856.2	4843.9	4741.1
CAFS_HM_T_00067460	5724.2	5668.1	5847.3	5504.3	5691.5	5869.1	5865	5889.4	5870.8
CAFS_HM_T_00069052	4157.2	4177.9	4154.1	4236.4	4400.5	4378.1	4344	4413.8	4296.4
CAFS_HM_T_00092057	3459.8	3569.6	3550.4	3677.7	3823.6	3858.9	3852.2	3911.4	3825.8
CAFS_HM_T_00029282	2705.1	2644.4	2583.5	2823.5	2810.9	2881.2	2983.4	2895.1	3006.2
CAFS_HM_T_00081028	2824.7	2875	2953.4	3000.7	2920.2	3062.4	3109	3276.5	3143.2
CAFS_HM_T_00030835	2673.3	2843.6	2708.4	2947	2740.3	2960.1	2870.9	2948.3	2885.1
CAFS_HM_T_00009561	2474.1	2463.3	2517.2	2591	2804.5	2903.6	3206.4	3045	3182.5
CAFS_HM_T_00062026	2364.9	2416.6	2379	2488.8	2395.4	2446.4	2339.4	2368.7	2365
CAFS_HM_T_00064381	1839.1	1818.9	1873.7	1905.6	1944.8	1898.5	1781.5	1845.1	1816
CAFS_HM_T_00053010	2181	2149.5	2120.1	2317.9	2270.2	2394.5	2601.9	2565.2	2587.2
CAFS_HM_T_00011558	4452.2	4471.2	4395.2	4500.6	4355.6	4356.4	4437.8	4446.2	4353.7
CAFS_HM_T_00080750	3126.5	3215.1	2787.8	2149.1	2800.4	1551.6	1314.1	1344.1	1241.2
CAFS_HM_T_00087698	2455.4	2420.1	2481.7	2550.9	2502.4	2622.9	2540.2	2482.1	2551.4
CAFS_HM_T_00062519	2222.3	2351.8	2262.3	2299.6	2134	2322	2151.7	2266.3	2223.9
CAFS_HM_T_00040428	2651.2	2609.9	2599.2	2620.9	2583.2	2555.3	2598	2620.5	2630.1
CAFS_HM_T_00043781	3701.3	4012.1	3704.7	4141	3882	3917	3897.8	3958.1	3867.1
CAFS_HM_T_00084880	4202.5	4212.4	3578.6	1794.9	3232.8	1635.3	1306.4	1345.5	1201.7
CAFS_HM_T_00074457	1889	2009.5	1852	1846.6	1812.1	1787.3	1699.6	1760.1	1730.9
CAFS_HM_T_00068798	2848.3	2897.7	2777.8	3028.8	2993.8	3028.8	3006	2970	3050.3
CAFS_HM_T_00087652	3277.1	3228.2	3201.5	3244.7	3315.8	3358.1	3392.6	3303.7	3473
CAFS_HM_T_00014122	4346.3	4300.2	4298.7	4106.4	4163.1	4276.6	4397.9	4522	4412.2
CAFS_HM_T_00051022	2999.4	3011.8	3091	3142.3	3140.6	3356	3323.5	3389.8	3427.4
CAFS_HM_T_00089584	4668.1	4687	4708.5	4401.6	4835.2	4641.7	4642	4744	4599.4
CAFS_HM_T_00076739	4510.5	4352.2	4334.4	4373.9	4016.9	4045.9	4103.7	4087.8	3953.8
CAFS_HM_T_00089312	1316.3	1316.5	1372.7	1272.9	1295.4	1299.7	1320.7	1298.9	1298.2
CAFS_HM_T_00057480	1977.9	1883.3	2001.4	1913.8	1921	2008	2045.9	2122.3	2064.5
CAFS_HM_T_00084019	79.4	80.8	78	73.8	79.3	72.9	75	78.9	76.1
CAFS_HM_T_00026365	3905.7	3873.5	3838.9	4050.5	3939.5	4151.4	4266	4247.6	4237.9
CAFS_HM_T_00017050	3315.4	3274.1	3338.2	3234.3	3181.6	3258.9	3355	3299.5	3313.6
CAFS_HM_T_00057454	1184	1231.1	1115.4	750.6	1206.3	562.1	411.1	440.4	402.7
CAFS_HM_T_00021094	4680.4	4594	4601.8	4905.1	4749.1	4936.6	5367.3	5269	5371
CAFS_HM_T_00045647	2646.7	2776.1	2934.4	3269.7	3255.6	3448.6	2821.1	3410.4	2780
CAFS_HM_T_00026614	2677.1	2678.1	2669.6	2837	2572.9	2793.8	2755.9	2847.4	2809.4
CAFS_HM_T_00025124	2034.6	2015.7	2034.3	2095.4	2190.1	2207.1	2353.7	2366.2	2331.7
CAFS_HM_T_00059969	2634.8	2673.3	2676.3	2882.1	2742.1	2791.5	2943.3	2938.8	2917
CAFS_HM_T_00075342	1983.3	1988.6	1998.8	2069.3	2065.7	2091.3	2014.9	2063	2036.8
CAFS_HM_T_00021076	3379.5	3366.2	3258.9	2794.4	2988.6	2482.9	2251.8	2343.9	2251.4
CAFS_HM_T_00063546	4474.8	4437.7	4423.1	4250.6	4509.9	4428.8	4387.7	4489.2	4457.7
CAFS_HM_T_00028073	3145.2	3106.1	3167.8	3298.3	3251	3320.7	3389	3470.3	3397.1
CAFS_HM_T_00067660	2918.4	2975.8	2871.2	2802.6	2850.1	2857.8	2812	2884.7	2831.2
CAFS_HM_T_00037508	4111.4	4082.5	4036.8	3835.8	4037.2	4135	3929.7	4008.4	3979.6
CAFS_HM_T_00040502	1338.2	1366.6	1432.4	1407.8	1489.8	1352.5	1278.2	1462.2	1340.9
CAFS_HM_T_00063030	3065.1	3066.5	3143	2989	3036.1	3104	2912.2	3013.9	3034.7
CAFS_HM_T_00069351	775.1	1020.7	757.4	1013.2	827.3	721.6	666.7	673.9	630
CAFS_HM_T_00016432	3061.1	3093.4	2838.1	2577.5	2785.6	2390.5	2094.8	2206.6	2098.3
CAFS_HM_T_00059504	3736.1	3686.9	3550.7	3931.5	3764.7	3766.2	4327.8	4297.5	4310.9
CAFS_HM_T_00042401	2747.1	2683.7	2703.9	2855.2	2846.4	2865	3028.7	2962.6	3045.5
CAFS_HM_T_00090136	3254.4	3349.8	3245.5	3333.9	3450.9	3460.4	3420.2	3494.5	3416.2
CAFS_HM_T_00049316	4215.5	4322.2	4286.3	4256.4	4297.1	4236.5	4354.3	4396.1	4329.8
CAFS_HM_T_00063446	1990.7	2038.7	1929.4	1430	1783.1	1232.2	1420.3	1835	1252.7
CAFS_HM_T_00020634	2756.4	2763.9	2697.5	2465.1	2520.7	2593.8	2640.3	2644.8	2606.5
CAFS_HM_T_00048562	4592.3	4588.4	4522.3	5085.9	4623.5	4895.7	4971.5	4899.1	4851.1
CAFS_HM_T_00013787	1527.4	1526.3	1473.8	1483.2	1524.2	1389.3	1384.7	1381	1387.3
CAFS_HM_T_00054831	2102.3	2159.2	2046.2	2077.5	2198	2272.7	2518.2	2474.5	2614.7
CAFS_HM_T_00000705	2941.2	2961	2951.3	2526.3	2713.1	2416.7	2251.2	2303.6	2201.7
CAFS_HM_T_00016209	4437.6	4337.4	4804.9	6240.7	3417.7	3560.5	1950.9	2231.6	2024.7
CAFS_HM_T_00046640	345	343.3	347.5	348.1	350.5	359	368.6	378.4	380.9
CAFS_HM_T_00091274	2270.1	2382	2279.3	2218.7	2258.6	2276	2282.7	2394.1	2325.1
CAFS_HM_T_00086398	2127.1	2135.7	2099.9	2079.2	2113.1	2151	2140.3	2174.3	2135.1
CAFS_HM_T_00013189	1923.9	1862.9	1985.2	1893.1	2039.6	2021.4	1793.4	1797.4	1705.6
CAFS_HM_T_00010298	2099.6	2053.6	2125.3	2158.2	2041.1	2378.4	2394.4	2308	2362.2
CAFS_HM_T_00087508	2258.6	2304.1	2297	2262.6	2236.3	2288.6	2564.5	2608.6	2557.3
CAFS_HM_T_00015614	164.8	172.5	172	182.1	207.2	201.8	787.3	771.8	345.5
CAFS_HM_T_00011710	4385	4353	4420.1	4354	4396.5	4495.1	4829.4	4663.6	4753.5
CAFS_HM_T_00001792	3367.1	3340	3473.7	3460.1	3851.3	3805.7	4287.8	4133.3	4228.1
CAFS_HM_T_00014230	3376.7	3378.2	3296.4	3492	3595.3	3582.5	3724.3	3719.7	3656.4
CAFS_HM_T_00059277	3433.2	3392.9	3622.1	3737.5	3647.3	3918	3813	3845.1	3980.8
CAFS_HM_T_00015671	3158.9	3128.1	3061.3	3126.3	3181.2	3199.8	3162.1	3293.8	3254.2
CAFS_HM_T_00082931	380.1	350.5	361	344.9	367.8	336	379.1	339.3	363.6
CAFS_HM_T_00072640	3972.3	3828.4	3879.5	3804.4	3868.7	3898	3953.8	4007.6	3945.5
CAFS_HM_T_00022113	3592.6	3550.7	3620.8	4018.1	3635.8	3780.8	3625	3644.1	3643.6
CAFS_HM_T_00023390	2331.2	2386.3	2454.8	2418.7	2392.5	2553.8	2521.3	2562.6	2617.4
CAFS_HM_T_00024878	3036.4	2995.7	3026.3	3132.3	3064.9	3194	3361.8	3217.8	3301
CAFS_HM_T_00091103	2780.4	2639.1	2689.6	2680	2803.5	2738	2703.5	2738	2717.4
CAFS_HM_T_00081886	446.8	445.1	504.1	298	293.5	299.2	277	291.2	282.7
CAFS_HM_T_00040039	2783.6	2794	2922.1	2804.5	2910.4	3043.4	3002.1	3069	3174.4
CAFS_HM_T_00054900	1558	1482.4	1563.4	1437.7	1449.1	1469.9	1594.6	1557.1	1576.2
CAFS_HM_T_00004057	2988.1	3029.6	3000.3	2852.2	2926.6	2865.5	2734.3	2857.3	2825.7
CAFS_HM_T_00071759	2712.6	2808.5	2662	2633.8	2835.6	2680.2	2579.5	2659.6	2540.9
CAFS_HM_T_00013829	1265	1258.6	1242.2	1305.3	1278.1	1425.7	1401.3	1391.7	1420.7
CAFS_HM_T_00086407	2331.9	2277.6	2302.5	2437.4	2460.9	2395	2626.7	2648.3	2557.8
CAFS_HM_T_00007037	4505.3	4397.6	4521.6	4603	4485.6	4718.8	4663.1	4762.5	4735
CAFS_HM_T_00035362	2397.5	2385.5	2275	2611.8	2360.3	2420.9	2263	2248.6	2269.9
CAFS_HM_T_00072952	2495.7	2500.4	2513.2	2419.2	2501	2525.1	2612.2	2491	2592.5
CAFS_HM_T_00075936	2962	2894.7	2928.2	2994.5	2945.7	2965.7	3309.8	3131.2	3183.9
CAFS_HM_T_00016679	3349.9	3290	3357.8	3577.5	3355.4	3569.9	3638.6	3536.3	3683.6
CAFS_HM_T_00053319	3190.5	3164.9	3166.3	3481.4	3556.8	3670.6	3720.7	3904.4	3745.5
CAFS_HM_T_00059764	1835.2	1811.2	1837.9	1802.3	1907.6	1958.7	1925.2	1952.9	1924.8
CAFS_HM_T_00019527	4521.5	4390.6	4611.7	4480.4	4501.4	4717.5	4514.6	4578.7	4533.4
CAFS_HM_T_00035137	2662.7	2700.8	2527.3	2525.3	3341.9	2688.3	2030.7	2019.8	1870.1
CAFS_HM_T_00064310	3632.2	3529.6	3411.3	3355.2	3343.1	3479.6	3562.9	3573.5	3554
CAFS_HM_T_00028602	3221.5	3147.3	3234.6	3070.3	3111	3044.5	3417.8	3343.4	3423.5
CAFS_HM_T_00026250	3125.2	3121.7	3004.3	3145.1	3254.6	3286.5	3312.9	3268.8	3264.1
CAFS_HM_T_00003225	5229.7	5165.5	5492.6	5386.3	5407.4	5533.2	4948.6	5052.7	4978.5
CAFS_HM_T_00091218	3946.9	3932.2	3877.5	4067.8	3987.6	4148.9	4534.6	4683.4	4482.8
CAFS_HM_T_00089954	4618	4548.3	4576.6	4611.6	4664.4	4844.1	4805.7	4881.6	4819.5
CAFS_HM_T_00044079	3702.9	3573.3	3658.7	3389.9	3570.3	3506.9	3467.6	3382.7	3529
CAFS_HM_T_00003447	1322	1294.9	1300.7	1314.7	1322.6	1321.2	1364.7	1403.7	1425.3
CAFS_HM_T_00087328	2831.3	2827.6	2854.7	2941.3	2969.1	3133.5	3227.6	3053	3133.7
CAFS_HM_T_00022599	3404.8	3408.1	3400.3	3512.3	3501.8	3562.1	3543.8	3529.4	3476.6
CAFS_HM_T_00061256	2290.3	2370.6	2373.7	2512.4	2392.1	2629.8	2554.9	2550.3	2574.7
CAFS_HM_T_00006180	3677.5	3642.3	3607.7	3677.4	3665.8	3677.9	3741.3	3740.9	3621.5
CAFS_HM_T_00026966	1403.3	1441	1458	1385.9	1498.1	1547.1	1491.3	1556.9	1486.7
CAFS_HM_T_00033433	2736.7	2789.1	2656.4	3274.5	3197.1	3385	3084.2	3195.6	3011.2
CAFS_HM_T_00056681	1557	1600.5	1559.3	1546.7	1543.6	1416.5	1458.4	1463.8	1409.5
CAFS_HM_T_00040827	3655.7	3798.6	3671	3737.8	3768.1	3810	3822.3	3820.1	3808.1
CAFS_HM_T_00076920	714.5	729.3	697.1	656.1	671.8	636.1	603.6	610.6	609.3
CAFS_HM_T_00065317	4143.5	4232.3	4312	3959.9	3682.9	3275.3	2560.5	2689.6	2478.3
CAFS_HM_T_00067532	3182.6	3057.1	3269.7	3105.4	3180.7	3338.8	3415.1	3337.8	3436.4
CAFS_HM_T_00081922	4397.5	4372.3	4403.4	3943.3	4254.7	4583.8	4419.4	4292.3	4582
CAFS_HM_T_00004948	3447.2	3321.4	3409.5	3371.5	3390.5	3477.6	3335.8	3247.6	3252
CAFS_HM_T_00061641	2177.9	2172.2	2173.4	2355.8	2409.9	2566.5	2641.1	2587.2	2583.3
CAFS_HM_T_00088572	2530.3	2488.1	2438	2533.2	2590.2	2517.3	2713.3	2555.7	2651.5
CAFS_HM_T_00021142	2853.3	2782.2	2997	2963.2	2810.6	2956.2	2994.6	2992	3030.2
CAFS_HM_T_00017218	1346.3	1339.6	1350.5	1333.9	1369.3	1307.7	1388.1	1374.6	1417.2
CAFS_HM_T_00000557	1966.6	1913.6	1981.9	1866	2001	2000.1	2035.5	2031.4	2025.5
CAFS_HM_T_00046881	3582.9	3608.8	3538.2	3784.4	3779.4	4185.1	4097.3	4196.7	4154
CAFS_HM_T_00085296	5895.4	6257.9	5748.1	5966.6	5615	4945.4	4741.5	4663.2	4584.5
CAFS_HM_T_00001910	1216.2	1202.8	1237.8	1222.1	1148.5	1159.1	1169.3	1205.4	1230.2
CAFS_HM_T_00031085	1616.7	1618.8	1577.6	1893.9	1801.9	1926.4	1814.1	1785.3	1766.2
CAFS_HM_T_00046767	2225.1	2251.9	2226.3	2584	2446.8	2601.6	2620.5	2689.8	2638.2
CAFS_HM_T_00009324	2503.8	2544.2	2598.2	2180.6	2403.4	1864.9	1442.8	1539.6	1431.5
CAFS_HM_T_00015330	2506.6	2526.7	2529.8	2830.3	2771.2	3011.4	2961.2	2741.4	2916.4
CAFS_HM_T_00005478	2737.7	2767	2748.8	2939.8	2984.2	3090.9	3103.7	3210.5	3175.1
CAFS_HM_T_00037146	3002.9	2965.1	3018.4	2898.9	3033.3	3069.3	3009	3097.5	3080.3
CAFS_HM_T_00000654	8094.9	8855	8559.2	9821.8	7836	8550.6	8695.4	8380.1	9060.7
CAFS_HM_T_00011605	2115.3	2101	2134.4	2216	2235.8	2229.7	2092	2102.6	2178.9
CAFS_HM_T_00038366	4237.6	4126.4	4286.6	4001.5	3903.9	3838.8	4169.8	4054.7	4130.6
CAFS_HM_T_00034302	3079.7	3133.7	3018	3110.3	3141	3178.1	3154.7	3156.5	3179.8
CAFS_HM_T_00078440	4186.3	4198.2	4042.9	3895.3	4048.5	3842.3	3654.8	3680	3727.8
CAFS_HM_T_00003816	2507.6	2474.9	2482.2	2441.3	2578.3	2621.8	2285.4	2325.2	2280.4
CAFS_HM_T_00068464	1434.4	1350	1377.6	1349.5	1375.4	1277.6	1231.5	1263.2	1270.7
CAFS_HM_T_00057859	1705.1	1708.3	1671.1	1719	1714.4	1796.5	1728.1	1801.8	1780.7
CAFS_HM_T_00071730	4600.3	4536.9	4622.1	4544.9	4523.3	4622.3	4937.8	4754.5	5017.6
CAFS_HM_T_00019446	3441.5	3421.4	3380.4	3673.6	3606.7	3741.2	3988.2	3717.6	3864.7
CAFS_HM_T_00054509	962.8	944.8	1024.4	933.5	952.1	959.7	964.6	939.7	984.5
CAFS_HM_T_00032486	3547.9	3630.2	3523.3	3594.6	3590.3	3703.8	3630.5	3688	3670.9
CAFS_HM_T_00036396	5855.4	5645.1	5092.5	3511.1	3680.1	3210.2	2891.8	3178.3	2930.3
CAFS_HM_T_00009342	2941.6	2902.5	3021.7	3042.3	3025.9	3132.9	2996.7	3181.5	3068.1
CAFS_HM_T_00046939	1122.3	1205.5	1140.8	1154	1155.2	1164	1166.9	1220.3	1197.5
CAFS_HM_T_00031817	3510.4	3424.8	3599.1	3444.9	3556.3	3699.4	3866.6	3736.5	3897.9
CAFS_HM_T_00063949	2919.8	2939.4	2947.4	3143.5	3106	2986	3187.2	3399.8	3041.4
CAFS_HM_T_00031119	4329.3	4141.7	4331.8	4236.5	4235.1	4233.8	4307.3	4451.7	4270.8
CAFS_HM_T_00085852	6883	6932	6966	7251.8	7524.4	7650.8	7505.7	7346.7	7379.6
CAFS_HM_T_00051033	3628.8	3655.1	3654.8	3703.4	3694.2	3794.6	3845.2	3992.2	3903.9
CAFS_HM_T_00002401	2875.3	2984.2	2884.9	2900.8	2954.3	2959	2934.4	3039	2941.5
CAFS_HM_T_00033843	2392.5	2498.1	2481.4	2460.1	2427.1	2632.2	2403.8	2436	2396.8
CAFS_HM_T_00051688	2895.5	2886.7	2908.5	2856.6	2961.5	2868.8	2920.6	2885.2	2883.8
CAFS_HM_T_00067454	3196.5	3171.9	3180.6	3337.7	3327	3403.8	3397	3484.5	3337.3
CAFS_HM_T_00041607	2589.2	2576.8	2623.9	2655.2	2725.3	2716.1	2714.1	2707	2742.2
CAFS_HM_T_00058826	2938.3	2899	2908.8	2793.8	2867.1	2945.8	2884.6	2930.7	2918.5
CAFS_HM_T_00038520	916	961.1	933.2	880.1	959.6	827.9	730.9	773.5	739.9
CAFS_HM_T_00016811	1914.3	1849.9	1818.2	1976.5	1957.9	2011	2164.2	2086.3	2089.4
CAFS_HM_T_00088070	5694.1	5613.3	5965.2	5349.9	5150.2	5265.2	6203.8	6251.7	6386.1
CAFS_HM_T_00026281	1799.7	1839.5	1845.6	1916.7	1901.1	2022.8	2285.4	2415.1	2304.6
CAFS_HM_T_00076758	3878.5	4052.7	3800.3	4279	4103.5	4150.8	3770.1	3864.9	3830.1
CAFS_HM_T_00067055	840.4	1225.2	856	1136.7	1009.2	879.6	851.5	856.3	864.6
CAFS_HM_T_00063174	3004.9	2949.9	2935.9	2983.5	2986.4	3106.1	2964.5	3035.6	3006.4
CAFS_HM_T_00039199	5500.5	5629.1	5591.6	5310.4	5342.4	5074.2	5364.7	5416.6	5246.1
CAFS_HM_T_00029151	435.5	427.2	416.9	413.6	417.3	419.2	386.6	409.7	389.3
CAFS_HM_T_00091897	2453.6	2468.5	2433	2521.1	2534.8	2651.9	2564	2614.8	2631.4
CAFS_HM_T_00030553	1756.8	1809.5	1786.4	1791.6	1799.4	1923.6	1761	1854.6	1808
CAFS_HM_T_00013220	2140	2131.3	2087.2	2083.4	2181.5	2164.1	2016.4	2017.4	2013.1
CAFS_HM_T_00034294	3156.1	3185.3	3195.9	3329.1	3165.3	3331.1	3051.4	3159.8	3111.6
CAFS_HM_T_00051016	3090.6	3032.5	3152.2	2976.6	3006.2	3054	3164.9	3149.9	3155.2
CAFS_HM_T_00031038	3429.8	3339	3355.9	3333.3	3345.5	3340.7	3425.6	3501.2	3483.9
CAFS_HM_T_00077847	818.7	777.4	811	699	730.7	726.8	769.8	728.3	751.4
CAFS_HM_T_00008662	2210.8	2114.2	2206.4	2245.6	2244.8	2321.3	2457.4	2484	2448.6
CAFS_HM_T_00079937	2859.2	2775.7	2808.2	2836.4	2989.9	2843.6	2497.7	2606.2	2510.5
CAFS_HM_T_00027267	1944.8	1937.1	1925.1	1807.4	1887.5	1865.6	1698.6	1789.7	1841.7
CAFS_HM_T_00020661	1947.2	1960.8	1935	1952.8	1917	2033.9	2019	2047	2112.8
CAFS_HM_T_00063662	4608.2	5209.5	4225.3	2573.1	4314.6	1738.8	1206.3	1200.3	1043
CAFS_HM_T_00049915	15617.1	19717.4	15473.9	5648.2	3183	3068.2	2448.8	2469.3	2497
CAFS_HM_T_00090680	2557.9	2476.5	2502.9	2598.7	2551.1	2648.8	2634.8	2636.2	2665.3
CAFS_HM_T_00041049	2787.1	2850	2676.3	2704.7	2845	2885.4	2741	2710.6	2807.2
CAFS_HM_T_00088288	1414	1377.4	1334.3	1555.6	1337.3	1291.4	1349.7	1434.5	1291.1
CAFS_HM_T_00017102	1538.4	1543.5	1555	1574.6	1586.5	1637.7	1613.2	1730.5	1640.1
CAFS_HM_T_00090826	3110.4	3093.9	2910	3076.4	2978.6	2950.2	2825.1	2902	2819.6
CAFS_HM_T_00007207	2618.4	2719.6	2630.2	2960.8	2887.1	3007.7	2756.2	2838.6	2752.4
CAFS_HM_T_00056776	4522.9	4501.8	4568.3	4546.8	4487.7	4689.3	4636	4833.8	4696
CAFS_HM_T_00090579	2106.4	2059.4	2158.4	2144.4	2143.2	2247.9	2251	2353.6	2322.2
CAFS_HM_T_00038937	2652.1	2601.6	2550	2631.2	2648.4	2629.8	2805.9	2768	2757.2
CAFS_HM_T_00037274	2261.1	2190.5	2260.8	2269.5	2367	2356.1	2233.1	2251.8	2215.8
CAFS_HM_T_00072546	2402.8	2296.8	2309.1	2328.7	2380.2	2450.5	2489.6	2535.2	2519.1
CAFS_HM_T_00014913	984.3	957.1	938.1	973.7	985.4	1031.7	1033.1	1033.3	1005.3
CAFS_HM_T_00045601	5916.9	5600.7	5803	5758	6001.5	6067.8	6123.3	5909.2	5969.7
CAFS_HM_T_00090865	1009.1	1026.5	1046.2	1055.4	1043.7	1073.2	1088.7	1066.9	1118.5
CAFS_HM_T_00039521	3076.3	3204.5	3119.5	3292.7	3341.8	3272.3	3222.4	3308.5	3243.2
CAFS_HM_T_00034512	3457.3	3407.9	3480.1	3437.4	3614	3671.9	3427.2	3527.6	3537.1
CAFS_HM_T_00034442	2113.8	2084.6	2047.2	2129.9	1994.4	2068.7	2090.8	2092.9	2120
CAFS_HM_T_00041380	4272.1	4240.4	4305.2	4266.9	4037.7	4209.8	4237.9	4277.7	4295.8
CAFS_HM_T_00085036	3353.7	3238.3	3378	3043.6	3629	3118.4	3000.7	2996.9	2827.9
CAFS_HM_T_00078717	2757.3	2840.2	2784.1	3200.1	3175.7	3079.3	3172.8	3146	3259.3
CAFS_HM_T_00061527	1815.3	1838.5	1839.1	1740.8	1784.1	1778.7	1630.3	1758.1	1757.7
CAFS_HM_T_00019214	2047.2	2008.2	2115	2165.7	2054.5	2225.3	2193.5	2129.4	2171.2
CAFS_HM_T_00024483	3002.2	2991	3036.9	2627.3	2787.2	1827	1239.1	1282.6	1171
CAFS_HM_T_00086665	1872.3	1864.8	1822.7	1926	1916.2	1880.2	1878	1887.5	1937
CAFS_HM_T_00088066	3755.9	3761	3815.6	3916.1	3876.1	4020.3	3775.9	3990.6	3986.6
CAFS_HM_T_00005119	3043.7	3022.3	3042.3	3126.8	3101.4	3153.2	3177.1	3206.1	3140.1
CAFS_HM_T_00058953	1579.6	1528.3	1520.7	1640.9	1611.6	1661.1	1790.3	1838	1764.3
CAFS_HM_T_00086895	2513.1	2448.7	2445.5	2573.6	2623.9	2622.7	2684.9	2668.1	2701.5
CAFS_HM_T_00064934	3074.7	3097.4	2948.6	3100.8	3179.5	3158.7	3024.1	3085.3	3102.7
CAFS_HM_T_00035439	3906.3	3914.4	3870.3	3960	3850.7	3992.7	4145.9	4144.6	4156.2
CAFS_HM_T_00058956	2573.9	2562.7	2583	2400.7	2663.9	2556.6	2451.9	2493.9	2506.2
CAFS_HM_T_00059585	7167.1	6736	8184.8	4256	3956.2	3832	4078.1	4426.8	4679.8
CAFS_HM_T_00087477	570.1	572.7	563.6	623.8	626.2	632.1	618.8	633.5	640.9
CAFS_HM_T_00047031	3795.4	3678.6	3786.6	3861.3	3972.9	4063.5	4061.3	4080	4100.9
CAFS_HM_T_00086186	3153.5	3127.5	3124.4	3270.3	3298	3433.9	3383.9	3399.3	3389.7
CAFS_HM_T_00090804	1539.5	1542.5	1563.8	1576.7	1578.5	1639.2	1669.5	1773.8	1706.1
CAFS_HM_T_00057622	2402.2	2426.3	2416	2354.9	2340	2385.4	2358.7	2391.8	2370.6
CAFS_HM_T_00076753	3569.9	3555.1	3651.9	3183.5	3049.4	3293.8	3296.1	3365.4	3480.4
CAFS_HM_T_00070185	1906.4	1922.1	1837.7	1956	1867.5	1878.6	1941.2	1940.7	1933
CAFS_HM_T_00020870	735.7	727.5	733	663.1	701.8	643.3	609.4	588.9	625.5
CAFS_HM_T_00035874	2503.2	2508.6	2541.6	2459.4	2549.7	2467.3	2338.9	2328.3	2350.1
CAFS_HM_T_00045723	2025.8	1993.9	1979.7	2104.2	1959.1	2002.3	2094.9	1963.2	2084.7
CAFS_HM_T_00071736	3169	3173.5	3119.1	2975.7	3057	3068.7	2983.2	3016.8	2963.9
CAFS_HM_T_00022683	3222.6	3275.3	3248.3	3340.9	3400.4	3340.8	3389.7	3397.8	3321.2
CAFS_HM_T_00018827	3080.9	3251.1	3085.5	2936.2	3038.9	3092.9	3119.5	3236.8	3123.8
CAFS_HM_T_00072477	4276.9	4233.1	4376.8	4242.2	4437.2	4480.3	4728.7	4860.7	4792.5
CAFS_HM_T_00007349	5914.4	5989.5	5557.5	4579	5560.5	3976.4	3593.1	3565.8	3553.4
CAFS_HM_T_00048672	2470.3	2396.1	2413.6	2440.6	2441	2496.3	2479.3	2495	2502.5
CAFS_HM_T_00062600	3301.1	3302.5	3415.5	3333.8	3336.7	3433.3	3315.4	3485.2	3396.2
CAFS_HM_T_00001305	1782.2	1759.2	1786.7	1822.6	1836.5	1916.9	1916.6	1951.2	1955
CAFS_HM_T_00071841	2044.1	2014.8	2058	1898.6	1920.6	1875.5	1875.5	1900	1942.9
CAFS_HM_T_00037372	3186.2	3216.1	3210.1	3222.6	3355.4	3343.3	3364.4	3335.8	3400.4
CAFS_HM_T_00068852	2764.4	2758.3	2773.6	2580.6	2664.5	2654.6	2710.5	2732.9	2706
CAFS_HM_T_00032332	2177.6	2137.3	2088.9	2295.9	2043.7	2077.2	2165.6	2264.5	2173.3
CAFS_HM_T_00004443	322.6	332.2	344.8	311.3	318.6	355.9	346.2	324.3	362.3
CAFS_HM_T_00003351	1201	1203.7	1166.1	1281.7	1242.5	1283.1	1217	1230.7	1237.4
CAFS_HM_T_00015205	2054.4	2038.7	2003.3	2064.6	2250.4	2136.8	2002	1946	2005.6
CAFS_HM_T_00024367	3182.8	3311.9	3258	3299.8	3370.3	3466.9	3584.5	3591	3551.1
CAFS_HM_T_00013096	3377	3362.9	3395.2	3444	3418.6	3496.6	3749	3679.2	3804.8
CAFS_HM_T_00017913	2353.3	2365.4	2369.9	2471.3	2582.4	2725.7	2709.9	2731.9	2734.3
CAFS_HM_T_00008548	1067.1	1048.9	1057.9	1139.1	1075.5	1062.9	1087.7	1103.5	1068.8
CAFS_HM_T_00021306	3098.1	3108.7	3143.6	3108.4	3148.7	3024.9	3205.2	3124.4	3161.4
CAFS_HM_T_00082867	1521.3	1575.7	1740.8	1482.7	1562.7	1555.4	1484.3	1515.2	1603.2
CAFS_HM_T_00013087	1778.7	1805	1732.4	1737.8	1819.2	1844.3	1743.7	1826.7	1748.7
CAFS_HM_T_00017900	2629.9	2557.9	2659.8	2583	2552.3	2611.1	2636.7	2626.4	2619.7
CAFS_HM_T_00022800	2220.1	2143	2138.1	2495.2	2339	2365	2522	2492.6	2429.7
CAFS_HM_T_00058389	2463.7	2490.8	2422	2607.2	2547.4	2561.3	2500.9	2622	2533.3
CAFS_HM_T_00091439	3074.3	3156.2	3107.8	3347.5	3266.3	3397	3454.8	3481.3	3439.1
CAFS_HM_T_00068695	2196.1	2180.3	2182	2320.6	2301	2338.7	2441.5	2361.1	2384.3
CAFS_HM_T_00074538	2083.5	2065.5	1998.9	2011	1861.8	2071.5	1990.6	2073.5	2090.8
CAFS_HM_T_00039079	896.5	900.1	903.5	909.8	871.1	891.8	889.9	897.2	888.6
CAFS_HM_T_00014640	2782.3	2649.3	2670.1	2751.9	2788.1	2750	2887.9	2851.1	2875.2
CAFS_HM_T_00047035	1007.4	1007.6	1063.4	1008.6	977.4	1057.2	1116.5	1014.3	1126.3
CAFS_HM_T_00088538	2343	2266.4	2278.4	2398.9	2327.1	2334	2555.7	2623.6	2569.6
CAFS_HM_T_00032817	2761	2665.6	2675.4	2631.2	2574.6	2755.9	2868.8	2816	2854.7
CAFS_HM_T_00029821	3673.2	3648	3696	3713.8	3765.6	3732.4	3691.4	3610	3624.5
CAFS_HM_T_00080203	2600.9	2614.7	2566.9	2663.9	2648.7	2659.5	2645	2674	2716.5
CAFS_HM_T_00020287	647.8	504.8	602.1	468.7	503.1	435.2	451.4	429	443.6
CAFS_HM_T_00057816	2695.5	2700.8	2744.5	2705	2714.8	2677.4	2744.3	2859.8	2771.8
CAFS_HM_T_00042247	2121.4	2095.1	2128.3	2114	2279.5	2184.7	2187.5	2269	2239.4
CAFS_HM_T_00035435	129.4	150.9	127.1	162	135.1	134	131.6	124.8	123.2
CAFS_HM_T_00053649	2037.8	2107.4	2112.3	2551.1	2545	2737	2706.1	2715.3	2678.9
CAFS_HM_T_00015695	4529	4500.9	3974.5	1827.8	2839.3	1459.3	964.5	928.4	865.2
CAFS_HM_T_00076451	2549.6	2556.3	2706.4	2750.1	2707.5	2850.7	2794.4	2851.3	2731.3
CAFS_HM_T_00003605	2696.4	2686.9	2659.5	2598.3	2786.3	2632.3	2761.3	2664.2	2747.8
CAFS_HM_T_00003706	2565.6	2528.5	2474.8	2713.7	2693.3	2777	2991.8	2869.1	2909.3
CAFS_HM_T_00070546	375.8	376.7	412.3	369.3	398.3	341.7	309.1	329.8	336.2
CAFS_HM_T_00054949	2782.6	2704.5	2806.5	2610.2	2695	2713.4	2856.1	2845.3	2875.9
CAFS_HM_T_00033384	4209.4	4130.4	4229.8	3847.8	4128.7	3991	4007.2	4101.2	4107.3
CAFS_HM_T_00015176	1727.1	1802.5	1709.9	1732.4	1846.5	1740.6	1753.3	1752.2	1729.5
CAFS_HM_T_00054614	1860.2	1844.5	1847	1898.3	1891	1871.6	1916	1924.8	1948.7
CAFS_HM_T_00043065	2115.2	2060.9	2198.8	2262.6	2154	2388.5	2443.2	2362.6	2457.4
CAFS_HM_T_00074014	2904.6	3001.4	2799.4	2699.5	2903.7	2623	2599.1	2798	2522.4
CAFS_HM_T_00085760	2857.2	2803.7	2861.6	2905.9	2878.5	2918.1	2979.6	2998.1	2987.4
CAFS_HM_T_00049725	3256.2	3140.6	3210.1	2640.5	2437.2	2560.5	2451.7	2601.2	2630.5
CAFS_HM_T_00019174	2617.3	2566.6	2487	2289.4	2340	2461	2372.2	2436.2	2468.2
CAFS_HM_T_00028611	2561	2583.6	2535.8	2677.4	2487.7	2602.7	2641.1	2701.5	2701
CAFS_HM_T_00084097	2117.8	2117.7	2163.8	2192	2274	2226.2	2347.7	2483.2	2449.6
CAFS_HM_T_00037007	2314	2289.3	2371.1	2305	2371	2332	2436	2402.4	2403.6
CAFS_HM_T_00064372	1485.3	1483.6	1503.4	1524	1587.4	1555.3	1616.1	1632.3	1592
CAFS_HM_T_00003972	4594.2	4554.8	4408.8	4110.2	4280.1	3760.3	3316.7	3284.8	3207.3
CAFS_HM_T_00059915	2653.8	2830	2754.5	2866.8	2954.7	2960.9	2933	2979.4	2901.7
CAFS_HM_T_00048987	2953.6	2907	2975.9	3035.9	3002.6	3085.1	3321.9	3366.6	3498
CAFS_HM_T_00079390	2575.7	2577.6	2629.8	2652.9	2772.3	2789.7	2816.5	2886.3	2957.5
CAFS_HM_T_00019817	3638.8	3598.6	3569.5	3686.8	3774.3	3774	3761.8	3855.6	3847.3
CAFS_HM_T_00065611	11.7	19	13.3	8.5	12.3	12.8	10.9	9.1	9.6
CAFS_HM_T_00000978	1964	1983.9	1943.3	2980	2771.7	2934.7	3130.7	3025.6	2951.9
CAFS_HM_T_00010635	1511.7	1495.2	1566.7	1584.8	1528.3	1733.9	1739.7	1788.2	1827.7
CAFS_HM_T_00029076	2023.6	2048.2	1955.1	2028.6	2041.5	1952.3	1981	2002.6	1902.2
CAFS_HM_T_00001845	2688.2	2622	2569.7	2958.1	2886.6	2935	3260.3	3285	3221.4
CAFS_HM_T_00074546	1358.4	1431.8	1353.2	1363.5	1265.7	1288.4	1408.4	1466.3	1416.9
CAFS_HM_T_00075602	1858.3	1871.2	1883.6	1958.5	1896	1952.3	1756.9	1850.1	1796.1
CAFS_HM_T_00069480	2974.7	2990.6	3005.2	2744.9	2850.4	2777.5	2791.5	2830.5	2889
CAFS_HM_T_00090795	3276.4	3327.5	3523.7	3359.6	3627.4	3645.6	3300.3	3332.4	3378.9
CAFS_HM_T_00040868	2130.4	2153.2	2037.4	2235	2234.3	2243.3	2257.3	2254.5	2235.7
CAFS_HM_T_00046350	2030.9	2011.7	1985.1	2003.1	2065.1	2053.3	1988.2	1962.4	2021.8
CAFS_HM_T_00005053	3734.2	3632	3785.1	5010.1	2972.6	2907.7	1689.9	1805	1735.8
CAFS_HM_T_00045389	2788.8	2726.5	2924.6	2829.5	2763.7	2939.9	2974.2	2913.4	2974.1
CAFS_HM_T_00092126	1849.4	1985.4	1903.5	1796.7	1654.3	1751.3	2092.2	1940.5	2026.6
CAFS_HM_T_00010672	3407.2	3293.6	3457	3554.6	3496.1	3582.6	3600.9	3655.9	3713.7
CAFS_HM_T_00041987	2743.6	2827.2	2620	3117.2	2922.2	3174.7	2880.5	2825.1	2755.7
CAFS_HM_T_00043831	1923.2	1985.2	1925.7	1992	1903.8	1999.5	1875.2	1852.9	1886.8
CAFS_HM_T_00030696	1474.6	1482.2	1545	1486.6	1525.9	1582.6	1620.5	1642.2	1690.4
CAFS_HM_T_00045121	2429.3	2434	2509.9	2284.5	2382.8	2358.4	2406.3	2596.5	2575
CAFS_HM_T_00091427	718.4	707.1	696.8	745.3	724.1	657.8	613.3	586.6	626.6
CAFS_HM_T_00035168	2522.2	2416.6	2599.7	2635.4	2378.6	2415.7	2150.5	2242.7	2239.6
CAFS_HM_T_00031399	1105.7	1100.3	1101.6	1066.7	1096.3	1148.9	1161.6	1275.8	1213.5
CAFS_HM_T_00067649	2920.2	3045.4	2942.1	3122.7	3095.4	3184.4	3033.7	3085.8	3127.4
CAFS_HM_T_00068577	3040.5	3114.1	3054.3	3221.5	3117.1	3153	3244.9	3256	3251.8
CAFS_HM_T_00002927	722.8	709.2	710.6	682.4	731.6	690.4	759.1	743.3	789.3
CAFS_HM_T_00007670	2764.4	2747.6	2886.1	2849.9	2878.9	3091.9	3041.1	3133.6	3057.3
CAFS_HM_T_00026039	3573.4	3450.3	3455.4	3520	3521	3581.7	3622.4	3559.2	3494.4
CAFS_HM_T_00059280	1962.6	1823.7	1950.9	2000.7	2023	2014.7	2134.2	2134.2	2123.2
CAFS_HM_T_00046569	3279.8	3300.2	3338.1	3079.8	3140.4	3147.3	2959.7	2974.3	2898.1
CAFS_HM_T_00015421	11654.2	9643.5	10550.7	6462.4	7819.5	7486.8	7397.2	7054.2	7501.7
CAFS_HM_T_00047131	2492	2460.7	2529.4	2413.1	2366.8	2307	2239.9	2225.8	2242.6
CAFS_HM_T_00070408	3367.4	3396.3	3305.2	3353.5	3421.5	3421.7	3547	3582.5	3471.9
CAFS_HM_T_00041710	669.5	689.6	664.8	652.3	660.8	608.6	571.3	545	548.7
CAFS_HM_T_00018700	282.5	280.4	309.5	260.4	288.1	273.8	245.9	245.1	258.8
CAFS_HM_T_00052679	3293.1	3234.5	3321.1	3433.7	3311.4	3405.4	3534.8	3619.5	3695.8
CAFS_HM_T_00022906	215	217.2	194.8	169.5	209.4	161.9	144.4	163.5	141.8
CAFS_HM_T_00032493	3288.4	3302.6	3355.2	3357.6	3298.3	3392.9	3399.1	3411.7	3345.5
CAFS_HM_T_00024547	3065	3088.8	2950.3	2539.6	2708.2	2291.2	2145.2	2175.2	2076.2
CAFS_HM_T_00039641	912.2	920.6	896.1	972.2	914.3	971.1	1004.7	1008.2	978.7
CAFS_HM_T_00065545	3349.1	3250.5	3269.2	3114.5	3325.3	3174.1	3157.5	3276.9	3068.3
CAFS_HM_T_00056166	2934.9	2901.9	2802.6	3000.4	3276.2	3175.4	2777.5	2662.5	2594.4
CAFS_HM_T_00089694	2808.8	2853	2851.6	2938.4	2904.2	3017.7	2963.7	2999.3	2931
CAFS_HM_T_00013525	2484.1	2530.7	2545.2	2544	2540.9	2564.7	2599.1	2616.5	2582.3
CAFS_HM_T_00077881	2467.5	2484.9	2522.3	2505.1	2560.9	2678.7	2654.8	2635.1	2707.1
CAFS_HM_T_00021849	1522.2	1539.9	1458	1521.7	1508.1	1600.6	1511.7	1532.9	1575
CAFS_HM_T_00027527	2084.6	2155.1	1989.2	2129.6	2157.9	2119	2452.6	2415.4	2422.5
CAFS_HM_T_00053043	3079.6	3792.7	3257.4	3988.7	3475.4	3468.9	3179.6	3294.4	3273.3
CAFS_HM_T_00063402	2029	2093.4	1986.4	1924.7	2274.3	2162.8	2123.9	2023.2	2123.1
CAFS_HM_T_00070354	4263.2	4237.7	4184.7	4178.7	4138.9	4251.8	4237.1	4429.5	4151.7
CAFS_HM_T_00066232	2751	2641.2	2781.7	2988.5	2758.3	2884	3039.6	2884.7	2890.6
CAFS_HM_T_00063775	1843.5	1855.8	1796.7	1802.5	1816.1	1803.5	1807.2	1845.1	1787.3
CAFS_HM_T_00006344	2023.5	2007	2091.5	1996.1	1943.7	2086.9	2030.9	2163.7	2157.5
CAFS_HM_T_00077702	4013.7	4104.6	4230.4	3977.1	4175.6	4187.4	4513.6	4642.8	4659.6
CAFS_HM_T_00004455	1848.9	1868.6	1785.4	1601.8	1756.4	1560.1	1396.2	1402.8	1357.4
CAFS_HM_T_00032885	1756.7	1784.5	1733.1	1723.5	1710.7	1804	1597.3	1710.7	1641.9
CAFS_HM_T_00034255	1033	1025.3	1033.9	1047.1	1044.1	1101.2	1113.2	1102.6	1141.1
CAFS_HM_T_00003170	309.2	326.9	301	315.8	353	298.4	249.4	256.8	232.8
CAFS_HM_T_00026415	2773.1	2755	2811.3	2630.1	2673.6	2651.2	2643.6	2737	2736.6
CAFS_HM_T_00061958	2330.5	2312.4	2249.1	1922.8	2120	1799.6	1670.5	1584.8	1596.9
CAFS_HM_T_00034161	3274.3	3266.1	3277	3451	3369.4	3649.2	3335	3480.6	3413.7
CAFS_HM_T_00013451	1440.1	1496.8	1468.7	1499.8	1501	1595.7	1792.7	1769.3	1800.6
CAFS_HM_T_00024495	2456.3	2458.2	2463.1	2522.1	2452.1	2591.5	2507.1	2607.7	2565.5
CAFS_HM_T_00020445	1775.5	1769.4	1780.5	1806.6	1870.2	1881.1	1793.2	1852.7	1852.5
CAFS_HM_T_00032224	2149.9	2144.1	2128.8	2477.1	2418.9	2577.5	2434.9	2329.3	2362.5
CAFS_HM_T_00005244	2040	2125.9	2056	2251.4	2355.5	2369	2430.2	2447.8	2335.1
CAFS_HM_T_00039904	3493.6	3599.3	3367.6	3511.6	3415.6	3365.9	3539.9	3462.3	3501
CAFS_HM_T_00010878	3206.7	3299.5	3301.2	3461.9	3479.7	3388.7	3095.8	3343	3024
CAFS_HM_T_00021569	2841.4	2786.5	2875.6	2888	2959.2	2999.6	3026.5	2983.4	2971.1
CAFS_HM_T_00074258	3849.7	3866.7	3749.4	3813	3875.4	4068.1	3939.6	3884.9	3944.3
CAFS_HM_T_00085383	2499.8	2423	2282.8	1774.8	2275.6	1911	1648.2	1682.5	1723.6
CAFS_HM_T_00015036	2737.2	2717.1	2750.7	2840.1	2776.2	2705.6	2470.6	2434.9	2444.7
CAFS_HM_T_00046982	3189.9	3146.5	3123.8	3115.4	3089.2	3219.3	3439.6	3479.8	3448
CAFS_HM_T_00036296	1838.4	1834.2	1835.4	1821.8	1801.5	1845.5	1883.1	1916.1	1978.6
CAFS_HM_T_00047133	2626.8	2601.5	2781.9	3227.4	2184.1	2183.3	1241.3	1346.8	1270.7
CAFS_HM_T_00088581	2712.9	2757.9	2638.1	2700	2753.9	2861.5	2833.8	2748.3	2810.4
CAFS_HM_T_00083596	236.7	238.2	239.3	243.6	241.9	257.8	240.3	245.3	229.8
CAFS_HM_T_00054826	151	130	138.9	194.6	200.7	178.6	248.9	211.2	204.4
CAFS_HM_T_00064294	1751.4	1710.3	1718.2	1502.4	1552.8	1530	1441.3	1419	1438.1
CAFS_HM_T_00007105	3359.9	3463.1	3339.4	3600.3	3429.7	3580.7	3693.8	3804.9	3705.8
CAFS_HM_T_00028762	499.6	511	559.2	484.3	525.4	520.9	503.7	509.3	524.8
CAFS_HM_T_00061847	2118	2138.9	2098.8	2132.5	2107.3	2117.6	2141.2	2174.5	2111.5
CAFS_HM_T_00011832	2125.7	2192.1	2053.1	2250	2316.8	2316.2	2306.7	2362.8	2292.8
CAFS_HM_T_00090088	2909.5	2877	2850.8	2822.3	2856.4	3003.3	2960.9	3090.9	2965.1
CAFS_HM_T_00006023	1264.3	1272.4	1263.9	1313.4	1315.2	1315	1383.5	1373.6	1369.6
CAFS_HM_T_00047043	2351.2	2396	2366.1	2421.5	2415.1	2363.3	2395.7	2347.4	2355.2
CAFS_HM_T_00052004	4463.9	4976.8	4612.7	5191.8	4464.7	4640.6	4760.5	4661.7	4712.4
CAFS_HM_T_00027220	2072.2	1941.4	1963.4	2116.6	2049	2067.1	2155.3	2022.6	2172.7
CAFS_HM_T_00069122	2361	2303	2318.4	2295.1	2324.1	2332.2	2383.9	2358.6	2453.9
CAFS_HM_T_00065346	1467.2	1531.9	1522.6	1529.4	1507.7	1607.5	1652.3	1694.3	1647.3
CAFS_HM_T_00029106	2819.5	2743.9	2706	2309.5	2405.1	2156.8	1917.3	1910.4	1902
CAFS_HM_T_00052384	3754	3708.5	3700.7	3831.3	3760.9	3826.3	3770.7	3894.4	3675.5
CAFS_HM_T_00084565	2139.2	2109.4	2247.9	2284.7	2030.4	2106.8	1907.1	1979.4	1964.9
CAFS_HM_T_00068113	2339.3	2314.1	2277.1	2306.9	2360.2	2381.2	2385.4	2399.4	2493.4
CAFS_HM_T_00085056	3665.6	3744.3	3626.9	3365.9	3658.3	3438.9	3478.2	3516.8	3491.4
CAFS_HM_T_00004139	2429.4	2459.3	2406.5	2510.4	2496.5	2491.9	2530	2534.8	2487.2
CAFS_HM_T_00037413	3720.7	3773.2	3673.7	4051.8	4127.2	4167	4536	4449.8	4543.3
CAFS_HM_T_00078168	94.7	99	85.8	74.9	88.6	69.9	58.4	55.9	57.5
CAFS_HM_T_00036812	2537	2508.7	2455.7	2392	2488.1	2450	2403.6	2412.2	2354.8
CAFS_HM_T_00014234	2020.2	2013.2	1954.3	2013.5	2020.5	2140.2	2132.9	2206.8	2149.2
CAFS_HM_T_00021060	1823.8	1848.7	1799.4	1908.9	2078	2040.8	1797.5	1794.9	1788.6
CAFS_HM_T_00056409	2122.4	2149.4	2114	2157.2	2208.8	2179.9	2296.8	2255.9	2193.9
CAFS_HM_T_00080530	3488.1	3522.5	3548.5	3552	3527.5	3694.8	3478.4	3587.4	3674.5
CAFS_HM_T_00042308	2712.7	2619.8	2789.1	2704.2	2664.6	2849	2920.8	2882.3	2995.4
CAFS_HM_T_00067206	2316.4	2268.1	2297.7	2367.8	2443.3	2446.5	2351.2	2401.4	2316.9
CAFS_HM_T_00069463	3018	3055.7	3088.6	2991	2863.9	3142.3	2998.4	3202.1	3083.8
CAFS_HM_T_00045231	1799.2	1823.6	1837.9	1842.3	1869.9	1958.1	1705	1731.5	1721.4
CAFS_HM_T_00030657	1893.3	1853.2	1816.5	1861.1	1891.4	1876.1	1868.7	1922.8	1922.1
CAFS_HM_T_00051403	2457.6	2086.3	2442.2	2009.3	1922.2	1867.5	1774.7	1776.7	1757.1
CAFS_HM_T_00038958	3272.5	3291.3	3332.9	2890.1	3106.2	2831.3	2735.2	2835.2	2820.9
CAFS_HM_T_00046992	1812.8	1773.2	1830.2	1783.5	1943.1	1797	1775.1	1831.9	1847.8
CAFS_HM_T_00039938	2143.7	2062.1	2086.3	3572	2894.1	3239.6	2088.5	2089.9	2069.8
CAFS_HM_T_00042432	1650.3	1619.9	1638.6	1585.4	1657.2	1665.2	1667.6	1707.9	1686.9
CAFS_HM_T_00065718	2142.2	2120.7	2203.1	2126.1	2126.8	2159.3	2130.8	2146.7	2132.9
CAFS_HM_T_00081547	2914.4	2899.3	2798.8	2699.8	2733.3	2707.3	2701.7	2774.1	2690.4
CAFS_HM_T_00025402	2725.9	2748.4	2717	2783	2722.3	2788.7	3011.2	2978.2	2957.5
CAFS_HM_T_00082878	3006.1	3110.6	3000.4	2654.1	2895.3	2367.1	2139.5	2182.3	2106
CAFS_HM_T_00078295	2425.7	2372.2	2403.3	2509.1	2523.7	2565.7	2695.5	2827.2	2745
CAFS_HM_T_00073880	3413.6	3347.5	3452.5	3331.4	3300.7	3383.6	3365.1	3343.4	3320.6
CAFS_HM_T_00024484	5159.2	5063.6	4917.5	3945.9	4467.1	3058.9	2362.1	2436.9	2472.3
CAFS_HM_T_00005587	3406.8	3414.4	3390.8	3335.4	3479.7	3469.6	3506.3	3683.8	3554
CAFS_HM_T_00049569	3965.3	3766.9	3876.6	3606.6	3776.5	3776.2	3828.2	3973.5	3916.2
CAFS_HM_T_00065541	1675	1623.2	1591.8	1732.2	1715.1	1697.2	1818.7	1670.5	1803
CAFS_HM_T_00009717	1671.5	1666.9	1626.2	1725.1	1667.4	1701.9	1701.1	1809	1798.9
CAFS_HM_T_00011027	1859.2	1812.7	1748.7	1723.3	1642.6	1670.2	1785.1	1633.3	1711.9
CAFS_HM_T_00070854	1607.3	1530.5	1609.8	1809.2	1682.7	1944	1746.3	1727.9	1825.6
CAFS_HM_T_00040325	1901	1979.7	1714.6	1665.5	1706.4	1523.6	1454.7	1556.5	1412.1
CAFS_HM_T_00018545	2001	1971.1	2082.3	2223	2091.7	2304.9	2140.7	2195	2169.7
CAFS_HM_T_00059636	2409.3	2482.5	2640.2	2545.1	2460.3	2550.1	2356.9	2350	2385.1
CAFS_HM_T_00027779	3078.7	3071.3	2964.9	3014.3	3140.7	2904.1	2971.5	3046.3	2985.3
CAFS_HM_T_00018111	316.8	311.6	295.1	273.4	278.2	250.5	240.7	235	239.8
CAFS_HM_T_00018176	980.4	995.5	960	1432.4	1437	1492.9	1948.6	2100.6	2242.5
CAFS_HM_T_00030513	601.2	601.9	621.6	647.6	643.1	638.7	643.3	647.7	655.7
CAFS_HM_T_00053924	3590.3	3621.4	3532.7	3401.6	3642.5	3414.5	3495.4	3593.8	3458.6
CAFS_HM_T_00047854	3821.3	3198	3583.5	2371.6	2686.3	2710.7	3258.3	3132.8	3356.7
CAFS_HM_T_00067223	3015.2	3016.6	3003.3	2907.7	2955.5	2983	2927.6	2897.5	2917
CAFS_HM_T_00053536	588.5	586.2	626.7	426.8	383.5	407.5	382.9	400.7	388
CAFS_HM_T_00082980	3008.1	2967.9	2946.9	3019	3046.4	2930.3	3217.2	3167.2	3098.4
CAFS_HM_T_00042865	1245.9	1307.9	1243.3	1350.5	1319	1468.4	1251.8	1226.4	1187.9
CAFS_HM_T_00033881	247.6	293.9	274.7	287	289	271.5	245.9	238.1	230.6
CAFS_HM_T_00078356	1853.8	1933	1787.1	1537.5	1706.4	1491.5	1289.7	1341.4	1310.3
CAFS_HM_T_00019209	2954.6	2946.2	2987.9	3035.9	3032.8	3188.1	3141.7	3236.5	3138.3
CAFS_HM_T_00016866	3105.8	3071	3002.5	3157.5	3265.1	3173.5	3326.3	3317.3	3239.6
CAFS_HM_T_00027144	2852.8	2870.5	2743.1	3347.2	3336.3	2659.1	2171.6	2227.4	2011.3
CAFS_HM_T_00082066	2361.6	2419.6	2365.3	2264.5	2387.7	2326.8	2339.1	2404.6	2430.7
CAFS_HM_T_00059556	657.4	664.6	681.1	686	668	660.8	652.7	718.1	710.9
CAFS_HM_T_00076939	682.3	703.4	658.5	704.3	677.3	702.4	682.2	712.3	668.3
CAFS_HM_T_00076942	1324.1	1293.5	1266.3	1372.2	1361.7	1365.5	1373.3	1415.7	1364.3
CAFS_HM_T_00053960	1791.2	1738	1798.5	1696.6	1823.9	1725.1	1701.4	1776.5	1727.6
CAFS_HM_T_00082416	2072.2	2084.7	2225.1	2086.6	2124.4	2215	2239.8	2230.1	2304.6
CAFS_HM_T_00030710	2570.2	2631.4	2660	2676.9	2764.3	2734.2	2708	2729	2752.9
CAFS_HM_T_00085578	1976.1	1961.4	1982.5	2066	2052.2	2147.4	2165.2	2137.8	2180.7
CAFS_HM_T_00030286	768.6	825.3	761.3	651.4	737.6	583.2	519.3	515.2	505.6
CAFS_HM_T_00079159	5290.9	5095	5352.7	5081.2	4961.4	5070.1	5346.1	5334.6	5419.2
CAFS_HM_T_00052588	1322.6	1287.2	1276.6	1225.2	1269.1	1235.4	1281.6	1183.8	1245.5
CAFS_HM_T_00033155	3083.7	3154.5	3129.8	3070.1	3236.8	3247.1	3141.2	3206	3258.1
CAFS_HM_T_00067316	1413.3	1427.3	1391.5	1294.9	1408.3	1257.1	1200.5	1221.5	1209.3
CAFS_HM_T_00092416	2075.2	2138	2099.1	2081.2	2155.2	2192.1	2380.6	2378.1	2433.1
CAFS_HM_T_00014693	1995.8	1950.1	2013.6	2151	2070.4	2092.7	2033.7	2095.7	2155.1
CAFS_HM_T_00013122	1913.3	1950.9	1889.6	1884.2	1989.5	1931.3	1945.6	2066.6	1962
CAFS_HM_T_00081278	975.7	984.3	987.8	911.6	927.8	942.1	938.2	896.6	949.3
CAFS_HM_T_00090069	10.6	7.7	9.1	10.5	10.6	12.9	11.6	10.2	12.2
CAFS_HM_T_00028539	526	527.7	523.6	566.2	541.2	566.1	586.8	623.8	558.2
CAFS_HM_T_00021942	3051.2	3082.2	3002.8	2947.5	3124.4	3094.3	3055.2	3217.6	3163.7
CAFS_HM_T_00052356	2755.3	2762.8	2811.6	2936.6	2936.4	3118.1	3069.3	3045.5	3039.2
CAFS_HM_T_00040341	2191.6	2155	2155	2299.2	2275.7	2340.7	2357.9	2346.9	2425.5
CAFS_HM_T_00043371	1347.4	1347	1392.6	1270.7	1408.2	1317.1	1339.3	1351	1295.5
CAFS_HM_T_00065878	496.2	468.9	449.1	453	473.3	442.4	408.5	421	399.8
CAFS_HM_T_00029332	1338.8	1291.3	1401.1	1391.1	1419.1	1503.8	1374.1	1486.8	1488
CAFS_HM_T_00025437	1144.8	1157.1	1074.2	1124.6	1207.8	1003.9	924.9	931.5	864.5
CAFS_HM_T_00022714	3669.8	3656.2	3686.6	3752.9	3697.6	3807.1	3912.8	3929.8	3900.9
CAFS_HM_T_00036527	2127.1	2035.1	2111.3	2020.6	2031.3	2135.8	1974.5	2061.9	2097.3
CAFS_HM_T_00020780	1989.8	1913.2	2020.1	1985.3	1953.6	2038.5	2122.8	2081.4	2122.6
CAFS_HM_T_00074929	1156.6	1149	1151.9	1100	1062.5	1112.4	1336.5	1345.1	1293.1
CAFS_HM_T_00027047	2177.2	2117	2143.5	2139.4	2114.4	2341.4	2455.6	2539.4	2389.8
CAFS_HM_T_00052702	2472.8	2400.7	2360.2	2279.3	2294.7	2226.6	2155.5	2104	2156.1
CAFS_HM_T_00084153	2141.5	2083.9	2128.5	1962.8	2060.5	2103.2	1970	2000	1951.3
CAFS_HM_T_00024181	4443.8	4291.3	4339.3	4583.6	4528.6	4530.6	4836.5	4726.9	4833.3
CAFS_HM_T_00029274	1923.4	1998.4	1967.7	1929.2	2002.4	2026.9	1918.9	2035.1	1976.7
CAFS_HM_T_00036011	1859	1882.7	1916.6	2116.2	2195.6	2315.6	2231.9	2184.7	2203.2
CAFS_HM_T_00070960	1868.7	2000.1	1869.7	1934.3	1835	2029.7	1720.1	1731.4	1704.9
CAFS_HM_T_00091423	2464.4	2428.7	2402.2	2528.5	2510.3	2593.1	2625.3	2650.9	2565.5
CAFS_HM_T_00065362	2605.7	2527.6	2488.5	2273.6	2414.7	2225	2346.6	2212.4	2242.5
CAFS_HM_T_00074590	2496.4	2476.8	2403.5	2485	2450.9	2553	2766.7	2919.1	2714.9
CAFS_HM_T_00030374	598.8	695.3	585	693.4	653.5	555.9	483.8	494.7	462.8
CAFS_HM_T_00050022	3960.4	3951.9	3939	3816.5	3903.3	3859.6	3842.5	3954.7	3881.4
CAFS_HM_T_00080628	3419	3315	3393.3	3445.4	3359.6	3439.1	3570.7	3467.9	3585
CAFS_HM_T_00029724	1649	1617.6	1718.6	1654.9	1626.1	1697.2	1464.5	1533.1	1498.5
CAFS_HM_T_00034537	2441.5	2371.7	2453.2	2427.6	2426	2454.5	2294	2445	2394.8
CAFS_HM_T_00072746	2955.8	2912.4	3016.1	2950.8	3004.1	3035.2	2933.7	3060.2	2962.3
CAFS_HM_T_00090824	2304.4	2265.4	2305.5	2353.1	2322.1	2399.2	2366.9	2339.1	2312.8
CAFS_HM_T_00077106	1492.9	1462.6	1464.3	1544	1458.5	1548.7	1526.8	1576.4	1584
CAFS_HM_T_00001622	326.4	342.2	331.3	300.8	338.7	323.2	319	329.9	328.3
CAFS_HM_T_00060888	1089.6	1089.1	1019	1128.3	1136.8	1102.1	1190	1099.2	1128.3
CAFS_HM_T_00057721	2059.9	1994.7	1994.5	1843.6	1972.8	1984.1	1829	1860.4	1801.9
CAFS_HM_T_00059937	2004.7	2057	2107.1	2186.1	2405.5	2195.3	2260.8	2182.5	2273.1
CAFS_HM_T_00047947	3802.9	3883.9	3690.1	3613.7	3702	3516.7	3387.3	3500.5	3579.8
CAFS_HM_T_00032980	3897.4	3984.2	3842.9	3951.8	4027.2	4159.4	4190.5	4209.9	4254.9
CAFS_HM_T_00037535	2671.5	2823.6	2450.3	1675	1774.2	1516.9	1336.2	1277.1	1272.6
CAFS_HM_T_00091153	2171.5	2238.7	2141.8	2255.5	2211.7	2196.4	2208.8	2228.8	2209.8
CAFS_HM_T_00063456	2211.2	2227.8	2119.1	1938.9	2161.8	1844.2	1612.3	1665.9	1643
CAFS_HM_T_00062261	1306.3	1344.1	1411.5	1301.2	1403.6	1325.6	1181	1250.9	1195.6
CAFS_HM_T_00003662	2048.1	1952.6	2038.8	2089	2111	2171.9	2211.4	2157.1	2155.1
CAFS_HM_T_00007790	1529.1	1521.5	1561.9	1626	1624.9	1675	1636.8	1700.3	1724.7
CAFS_HM_T_00024561	4572.6	4560.8	4448.2	4365.6	4582	4538.3	4343.8	4517.4	4271.5
CAFS_HM_T_00016607	1755.4	1823.9	1852.8	1757.6	1744	1512.9	1146.7	1228.1	1122.4
CAFS_HM_T_00052068	1014.5	1033.4	1021.3	1014.4	969.6	937.5	952.1	982.8	975.3
CAFS_HM_T_00005949	705.5	691.2	692.7	695.4	706.6	684.7	688.1	715.9	715.9
CAFS_HM_T_00047334	791.4	750.3	784.7	804.5	799	766.6	796.8	818.7	790.3
CAFS_HM_T_00048033	1723.5	1709	1747.3	1720.5	1751.9	1772.6	1728.8	1711.6	1691.5
CAFS_HM_T_00045513	2692.9	2625	2866.7	2619.9	2592.9	2842.4	2848.2	2840.8	2945.8
CAFS_HM_T_00049501	3243.6	3264	3326.7	3216.3	3394.3	3250.7	3220.8	3325	3214.9
CAFS_HM_T_00033281	1533.1	1547.9	1533.9	1459.2	1587.4	1432	1489.1	1496.7	1520.6
CAFS_HM_T_00008022	2936.8	2828.7	2915.2	2917.1	2965	2999.1	2840.7	2951.9	2892.4
CAFS_HM_T_00028769	992.7	958	998.4	923.9	1018.8	954	1009.8	979.2	1006
CAFS_HM_T_00062028	2673.1	2800	2715.8	2582.8	2644.7	2547.2	2501.7	2480.4	2513
CAFS_HM_T_00004099	2769.4	2930.7	2740.9	2624.2	2626.5	2150.9	1815.4	1816	1800.5
CAFS_HM_T_00064369	1513.5	1545.7	1471.2	1473.7	1505.9	1455.3	1440.2	1473.6	1462.9
CAFS_HM_T_00077172	2545.6	2594.9	2585	2910.2	2849.7	2816.9	3077.5	3151.9	3128
CAFS_HM_T_00043751	360	350.2	342.7	361.4	348.8	328.3	366.2	368.9	365.2
CAFS_HM_T_00071990	89.3	96.6	104.7	99.1	94.4	109.2	118.4	113.9	118.4
CAFS_HM_T_00084281	451.8	422.7	434.5	415.6	416.6	447.4	438	417.7	460.6
CAFS_HM_T_00061368	1827.8	1843.5	1824	1865.2	1774.8	1805.8	1765.6	1874.2	1893.3
CAFS_HM_T_00075088	1625.9	1572.2	1584.8	1661.2	1653.6	1744.4	1742.3	1704.4	1694.7
CAFS_HM_T_00067610	2597.1	2504	2528.5	2623.8	2566	2612.3	2687.3	2623.6	2583.3
CAFS_HM_T_00040135	4451.4	4346.7	4488.7	4313.7	4433.5	4636.3	4911.9	5124	5003.5
CAFS_HM_T_00063598	909.2	917	919	991.5	1029.4	1124.4	965.9	991.8	972.3
CAFS_HM_T_00042826	2281.2	2287.1	2241.2	2219.1	2279.7	2334.4	2301.1	2412.9	2336.3
CAFS_HM_T_00086606	1753.3	1707	1699.2	1836	1790.5	1813.5	1784	1774.5	1747.4
CAFS_HM_T_00040046	2352.9	2403.9	2259.3	2181.2	2086.4	2050.7	1989.7	2035.6	2047.6
CAFS_HM_T_00044825	1783.1	1758.1	1766.9	1726.4	1776.3	1806.7	1884.2	1845.1	1817.8
CAFS_HM_T_00039766	2039.4	1993.2	2034.2	1984.7	2041.6	1944	1883	1876.4	1899.8
CAFS_HM_T_00041816	1766.3	1782.5	1792.9	1836.8	1834.9	1865.8	1979.1	1944.3	2064.3
CAFS_HM_T_00016837	3150	3383.9	3221.3	3589.3	3404.1	3536.9	3401.7	3391.7	3438.8
CAFS_HM_T_00085450	1593.5	1539.6	1580.8	1594.9	1549.3	1534.6	1567	1610.1	1604.4
CAFS_HM_T_00053735	1468.1	1462.9	1457	1465.2	1479.8	1470.1	1467.3	1528.5	1454.3
CAFS_HM_T_00025198	2429.3	2358.7	2380	2287.4	2319.9	2432.8	2112.2	2314.1	2259.5
CAFS_HM_T_00085326	2071.1	2113.5	2095.7	2114.1	2128.5	2188.9	2255.3	2294	2257.3
CAFS_HM_T_00027887	2172.8	2091.7	2161	1938.6	2007.1	1977.8	1936.3	2014.2	1972.1
CAFS_HM_T_00075045	1751	1720.2	1720.2	1622.5	1682.1	1691.6	1609.6	1632.2	1596.3
CAFS_HM_T_00043452	1784.6	1846.8	1802.2	1848.9	1872.7	1883.5	1764.6	1843.9	1803
CAFS_HM_T_00058804	1898.8	1880.8	1950.9	1854.9	1909.4	1849.3	1906.4	1928.4	1978.3
CAFS_HM_T_00070369	3520.1	3470	3560.5	3548.6	3615.6	3735.2	3656.6	3696.1	3669.2
CAFS_HM_T_00046641	458.1	461.3	456.7	375.2	357.1	402.2	422.1	405.6	371.9
CAFS_HM_T_00085228	2678.9	2658.5	2587.1	2795.2	2718.8	2808.6	2859.7	2935.6	2850
CAFS_HM_T_00047649	1647.4	1697.8	1642.8	1654.7	1713.6	1648.7	1708.8	1716.1	1662.7
CAFS_HM_T_00053842	2801.9	2936.4	2800.9	2379.2	2746.1	1895.5	1374.8	1440.9	1411.4
CAFS_HM_T_00045002	788.7	800.3	849	741	730.5	766.8	745.7	742	773
CAFS_HM_T_00004075	2298.8	2302.6	2319.7	2584.4	2340.4	2379	2437.5	2539.3	2513
CAFS_HM_T_00046389	2163.8	2231.6	2176.1	2158.7	2097	2151.1	2229.2	2216.6	2247.5
CAFS_HM_T_00021677	3118.5	3198.9	3095.2	2924.9	3069	2751.7	2641.2	2688.2	2581.5
CAFS_HM_T_00065207	2680.7	2691.1	2666.1	2657	2715.3	2675.7	2349.4	2463.6	2365.7
CAFS_HM_T_00034712	731.8	711.1	708	763.1	780.6	802.4	813.9	777.3	807.3
CAFS_HM_T_00064816	2272.4	2328.7	2313	2666.7	2540.8	2749.8	2476.8	2618.2	2538.8
CAFS_HM_T_00034080	1469.8	1479	1505.1	1426.3	1520.4	1551.4	1516	1432.6	1516.4
CAFS_HM_T_00032449	2384.6	2336.5	2279.4	2416.4	2334.3	2233.1	2315.9	2359.9	2270.9
CAFS_HM_T_00009257	3049	3139.2	3053.2	3079.6	3085.7	3062.6	3042.6	3087.3	3078.1
CAFS_HM_T_00016907	1934.2	1988.4	1924	1955	1927.9	1930.1	1987.5	1957.5	1936.3
CAFS_HM_T_00072126	449.6	453.6	412.9	446.6	474.2	428.8	412.5	422.6	427.8
CAFS_HM_T_00006848	2332.7	2390.9	2390.9	2385	2366	2485	2377.6	2424.9	2496.1
CAFS_HM_T_00065390	1853.7	1893.5	1889.6	1902.4	1955.1	1948.9	1992.7	1997	2019.2
CAFS_HM_T_00067281	2269.1	2292.1	2216.5	2204.7	2274.4	2245	2304.2	2415.5	2342.5
CAFS_HM_T_00025217	3721.7	3579.6	3729.5	3531.9	3446.7	3471.5	4046.8	4068.2	4131.3
CAFS_HM_T_00060545	1612.8	1644.6	1645.2	1692.1	1727	1713.1	1758.4	1743.2	1724.4
CAFS_HM_T_00019888	4357.7	4218.4	4256.5	4363.2	4347.4	4200.9	4356.1	4473.2	4334.2
CAFS_HM_T_00003377	2109.4	2156.7	2063.3	2257.2	2167	2291.9	2332.1	2347	2313.8
CAFS_HM_T_00045271	1866.7	1803.9	1847.6	2015.8	2063.9	2080.9	1878	2009.4	1939.4
CAFS_HM_T_00011193	1113.7	1065.4	1120.8	1075.7	1106.6	1062.7	1071.6	1064.1	1105.8
CAFS_HM_T_00055111	2807.5	2710.5	2684.9	2426	2527.4	2608.7	2403.5	2488.6	2591.8
CAFS_HM_T_00011866	3131.5	3076.7	3189.4	3293.5	2933.3	2938.3	2625.8	2740.9	2713.7
CAFS_HM_T_00089762	2138.8	2113.5	2168.4	2260.8	2236.7	2284.1	2284.8	2275.5	2288
CAFS_HM_T_00070596	2212.8	2212.1	2134.3	2279.1	2225	2294.6	2240.2	2280	2250
CAFS_HM_T_00011060	2282.3	2214.8	2182.8	2088.2	2488.1	2008	1878.9	1925.8	1933.8
CAFS_HM_T_00045157	2325.4	2347.6	2089.5	1331.5	1644.6	1297.8	1276.1	1369.8	1236.4
CAFS_HM_T_00012750	2484.3	2542	2431.8	2490.3	2522.9	2532.6	2530.1	2634.6	2614.3
CAFS_HM_T_00003318	2738.5	2726.3	2740	2676.5	2652.5	2674.3	2618.3	2637.2	2621.6
CAFS_HM_T_00019700	636.1	632	718.7	648.8	670.7	711.9	651.1	639	736.7
CAFS_HM_T_00013573	2330.7	2412	2374.8	1581	1849.3	1357.7	1090.9	1159.3	1110.2
CAFS_HM_T_00002760	1928.3	1971.7	1932.8	2045.2	2026.8	2140.3	2009.6	2074.4	2030.4
CAFS_HM_T_00054609	1811.4	1728.9	1743.1	1751.8	1639.9	1734.1	1753.4	1847.5	1856.1
CAFS_HM_T_00058261	2481.5	2520.5	2488.3	2537.4	2569.2	2619	2582	2651.5	2604.3
CAFS_HM_T_00022749	1143.8	1144.5	1133.5	1188.3	1151.7	1168.6	1134.9	1129.7	1168.5
CAFS_HM_T_00058644	319.8	313.2	318.4	284.6	330.1	292.8	289	302	305.8
CAFS_HM_T_00068002	889.6	892.2	924.9	891.5	909.6	879.9	904.6	874.4	882.5
CAFS_HM_T_00088432	2443.2	2508.1	2416.4	2239.8	2203.4	2180.1	1948.1	2007	2001.1
CAFS_HM_T_00077124	1679.9	1660.4	1691.4	1637.4	1616.3	1712.2	1658.1	1678.2	1650.2
CAFS_HM_T_00042621	410	436	426.8	432.3	445.9	473.3	466.1	450.9	479.9
CAFS_HM_T_00049901	1024.3	1028.8	1042	1000	997	1069.8	1042.1	1101.9	1132.5
CAFS_HM_T_00060704	1369.5	1429.8	1464.1	1426.6	1412.4	1508.4	1426.7	1401.2	1445.6
CAFS_HM_T_00032931	741.4	741.4	762.8	782.6	753.6	808.7	814.5	843.8	816.5
CAFS_HM_T_00083745	2667.6	2597.7	2649.3	2718.6	2709.2	2740.1	2806.6	2800.8	2842.6
CAFS_HM_T_00009572	2481.1	2509.8	2457.5	2508.1	2505.3	2477.7	2705.6	2671.5	2735.8
CAFS_HM_T_00013641	1188.5	1221	1235.2	1275.8	1255.2	1358	1359.9	1414.6	1427.4
CAFS_HM_T_00070380	950.4	928.9	895.4	920.1	955.4	875.2	921.5	944.7	942.6
CAFS_HM_T_00013438	1301.7	1243.3	1318.1	1449.4	1615.9	1605.4	7362.3	5591.1	2999.6
CAFS_HM_T_00041753	1579.2	1561.2	1576.3	1625.9	1543.8	1595	1656.3	1776.2	1664.9
CAFS_HM_T_00013853	3690.6	3738.2	3714.8	3559.5	3579.2	3413.8	3339.5	3440.1	3302
CAFS_HM_T_00083198	1381.5	1311.6	1470.2	2021.5	1241.1	1202	646.4	714.6	670.1
CAFS_HM_T_00087305	1948.2	1967.3	1962.4	1934.5	2002.6	1999.6	1807.2	1863.7	1874.3
CAFS_HM_T_00078438	1041	1017.2	918.4	1127.1	1064.1	1131.4	1204.5	1157.2	1215.2
CAFS_HM_T_00020216	1535.2	1560.3	1549.8	1635.2	1595.2	1604.3	1549.7	1661.4	1556.3
CAFS_HM_T_00054448	1592.2	1534.7	1503.4	1601.3	1610.7	1626.9	1658.4	1638	1667.4
CAFS_HM_T_00091334	2355.1	2365.6	2269	2536.1	2452.9	2534.1	2658.8	2659.6	2612.7
CAFS_HM_T_00055728	1708.5	1670	1694.1	1586.6	1728.7	1630	1653.6	1628.7	1654.2
CAFS_HM_T_00030564	1573.4	1552.3	1673	1312.7	1427.5	1328.2	1184.2	1234.2	1231.3
CAFS_HM_T_00035644	1107.1	1105.2	1095.7	1042.1	1151.7	1099	1025.9	1004.7	1068.2
CAFS_HM_T_00022716	1378.8	1399.5	1387.1	1413.1	1449.1	1510.7	1551.5	1575	1602.4
CAFS_HM_T_00022004	2976.8	2988.9	2903.6	2817	2814.9	2762	2603.7	2603.9	2601.4
CAFS_HM_T_00078360	2624.7	2646.8	2521.5	2352.8	2495.6	2300.4	2120	2212.7	2177.7
CAFS_HM_T_00034579	1713.7	1727.1	1729.3	1663	1748.2	1687.2	1851.7	1842.6	1807.2
CAFS_HM_T_00071340	3116.5	3062.5	2978.1	3204.1	3128.4	3222.2	3396.9	3312.7	3278.6
CAFS_HM_T_00057019	1594.8	1610.7	1528.3	1641.3	1649.9	1609.8	1659.6	1568.6	1600.2
CAFS_HM_T_00083072	2383	2385.6	2315.4	2382.1	2419.1	2450.2	2482.4	2466.5	2479.9
CAFS_HM_T_00014645	2399.1	2365.4	2305.4	2283.6	2320.1	2277.2	2186.5	2275.2	2243.2
CAFS_HM_T_00049169	1823.6	1801.7	1855	1885.6	1920.3	1925.8	2004.6	1950.3	1977.7
CAFS_HM_T_00007742	3034.6	2910.8	2917.8	2452.3	3064.2	2677.4	2638	2699	2562.7
CAFS_HM_T_00008832	1181.1	1201.8	1144.4	1261.8	1193.2	1293.3	1193.5	1212.8	1162.3
CAFS_HM_T_00075498	2660.6	2665.3	2613.8	2547.5	2670.1	2643.2	2530.6	2547.6	2529.1
CAFS_HM_T_00043559	2272.8	2255.5	2243.8	1944.2	1934.1	1893.7	1952	2028.9	2016.5
CAFS_HM_T_00050307	3996.7	4153.3	3994	4165.6	3950	3831.7	3746.3	3975.2	3847.2
CAFS_HM_T_00081961	1187.1	1162.9	1231.3	1191.9	1186.4	1205.3	1366.1	1320.5	1463.1
CAFS_HM_T_00082655	2747.6	2757.4	2714.9	2805.9	2805	2919.3	2881.2	2911.2	2915.1
CAFS_HM_T_00069403	2023.5	2086.8	2052.7	2131.9	2126.7	2291.3	2226.8	2254	2292
CAFS_HM_T_00017856	3982	3917.8	4171.3	4039	4068.2	4085.7	4049.9	4048.6	4096.3
CAFS_HM_T_00017802	2728.6	2767.9	2801.6	2589.5	2802.3	2619.6	2628.9	2744.4	2612.2
CAFS_HM_T_00027109	2118.9	2114.6	2084.7	2252	2312.4	2393.5	2453.7	2407.7	2317.8
CAFS_HM_T_00021023	619.6	711.2	613.7	758.1	686.8	647.7	676.3	703.5	671.5
CAFS_HM_T_00064208	1836.6	1809.7	1936.7	1801.6	1871.1	1906.7	1913.9	1952.3	1941.6
CAFS_HM_T_00024122	2438.3	2541.1	2520.1	2434.8	2492.3	2496.1	2571.1	2509.5	2506.4
CAFS_HM_T_00091939	669.1	677	712.6	653.1	695	695.4	677.8	678.8	681.8
CAFS_HM_T_00070651	2616.3	2558.2	2689.7	2944.8	3080.1	3065.5	3626	3580.2	3655.3
CAFS_HM_T_00007115	1725.5	1825.7	1858.6	1774.1	1974.6	1777.5	1523.1	1567.7	1506.1
CAFS_HM_T_00025311	2457	2394.7	2528.2	2526.7	2419.9	2683.9	2669.8	2731.3	2778.2
CAFS_HM_T_00068116	1957.6	2024.9	1906.9	1843.2	1986	1768.4	1649	1688.5	1605
CAFS_HM_T_00086451	2094.9	2074.4	2116.9	2169.4	2122.3	2152.1	2156.9	2202.6	2252.3
CAFS_HM_T_00028027	2100.7	2084.4	2063.6	2002.1	2032.2	2051.5	2065.7	2104.3	2038
CAFS_HM_T_00036986	2735.6	2642.1	2712.5	2646.4	2561.2	2668.4	2744	2625.5	2734.1
CAFS_HM_T_00078889	1504.9	1555.9	1516.5	1522.8	1480.4	1578.6	1632.9	1610.8	1624
CAFS_HM_T_00051523	1387.2	1374.9	1422.1	1426.7	1421.9	1482.4	1514.9	1512.9	1513.1
CAFS_HM_T_00075612	2040.2	2104.6	2134.2	2223.6	2255.8	2276.3	2273.2	2280.6	2277.3
CAFS_HM_T_00044386	1417.9	1357	1372.6	1409.9	1416.7	1416	1439.2	1489.2	1499.5
CAFS_HM_T_00078983	602.2	593.7	563.7	593.6	571.9	648.1	622	584.9	616.2
CAFS_HM_T_00088635	2721.9	2720.6	2823.1	3019.4	3079.6	3072.3	3090.4	3143.3	3066.1
CAFS_HM_T_00065779	2831.9	2838.8	2809.5	2329.8	2417.7	2134	1985.7	2055.8	2055.1
CAFS_HM_T_00059650	1759.4	1753	1770	1828.8	1810	1890.1	1907.4	1893	1951.3
CAFS_HM_T_00059643	1532.6	1507.4	1509.7	1496.5	1441.8	1458	1497.6	1473.6	1511
CAFS_HM_T_00023041	2161.7	2149.1	2174.4	2108.7	2185.4	2222.5	2291.8	2294.9	2302.4
CAFS_HM_T_00003521	4372	4269.9	4400	4380.5	4344.1	4724.7	4960.4	5202.7	5029.4
CAFS_HM_T_00045376	4052	3947	4005.9	3958.3	3993.4	4056.1	4252.6	4088.7	4151.2
CAFS_HM_T_00037896	934.9	989.2	933.7	1000.6	966.6	956.7	897.7	954.2	937.6
CAFS_HM_T_00043116	1679.6	1670	1706.7	1716.5	1672.1	1825.9	1826.5	1841.6	1854.7
CAFS_HM_T_00010588	3661.2	3682.4	3748.4	3615.4	3762.2	3651.8	3659.3	3753.6	3723.5
CAFS_HM_T_00013793	1596.2	1543.4	1484	1559.8	1573.8	1638.3	1589.4	1630.5	1575.9
CAFS_HM_T_00030865	3107.1	3088.6	3073.6	3095.1	3124.9	3186.1	3215.5	3170.2	3161.7
CAFS_HM_T_00035550	1891.3	1853.5	1899.9	1934.4	1969.8	1989.1	1931.5	1994.1	1956.2
CAFS_HM_T_00011481	325.3	367.6	362.3	398.9	366.6	397.4	383.5	369.4	381.1
CAFS_HM_T_00036156	1978.9	2005.2	1979	2049.1	2055.1	2141.3	2147.6	2166.9	2135
CAFS_HM_T_00005460	1925.8	1884.8	1899.3	1853.4	1988.9	1900.5	1874.9	1905.3	2031
CAFS_HM_T_00051736	4430.6	4349.3	4605.9	4442.5	4349.2	4503.8	4628.2	4598.7	4742.4
CAFS_HM_T_00061331	1690.3	1714.2	1653.2	1710.1	1690	1737.9	1694.7	1738.7	1667.3
CAFS_HM_T_00003809	3699.9	3642.8	3590	3550.4	3612.8	3624.7	3813.7	3607.6	3720.6
CAFS_HM_T_00045434	1842.8	1847.6	1855.6	1843.4	1892.9	1877.5	1883.3	1954	1925.2
CAFS_HM_T_00028506	2199.1	2291.3	2404.2	2800.9	2690.2	2577.2	2277.2	2633.1	2305.8
CAFS_HM_T_00033205	1670.5	1656.2	1611.6	1582.4	1654.4	1727.9	1754	1715.9	1772.1
CAFS_HM_T_00058016	962.8	979.5	959.1	939.1	960.3	947.8	920.8	934.6	919.5
CAFS_HM_T_00078874	2001	2047.7	2081.6	2111.8	2078.7	2127.2	1953.6	1922.7	1929.3
CAFS_HM_T_00079062	1324.5	1331.3	1274.1	1319.4	1315.3	1262.9	1334.4	1303.1	1260
CAFS_HM_T_00029269	1874.8	1892.6	1764.8	1702.5	1674	1689.6	1756.5	1816.8	1783.8
CAFS_HM_T_00075478	2326.1	2366.5	2355.8	2360.9	2362.8	2454.6	2392.6	2339.7	2330.5
CAFS_HM_T_00019869	2874.7	2905	2945.7	3062.6	3079.4	3027.5	3247.5	3352.6	3245.3
CAFS_HM_T_00064723	2007.6	1990	2042.9	1748.1	1806.1	1667.6	1591.3	1580.7	1608.7
CAFS_HM_T_00069483	1885.7	1841.2	1880.2	1914.9	1932	1954.9	1959.4	1998.3	1944.4
CAFS_HM_T_00058035	3265	3279.9	3196.4	3267.1	3599.6	3070.3	2926.1	2903	2905.1
CAFS_HM_T_00015642	2533.9	2546.1	2553.2	2682.9	2775.9	2813.2	2714.2	2687.8	2694.6
CAFS_HM_T_00042095	3185.4	3154.5	3105.1	3306.3	3245.4	3282.7	3399.5	3452.9	3364.2
CAFS_HM_T_00083132	3656.7	3626.1	3643.4	3666.4	3842.6	4092.8	3988.5	3784.7	3948.2
CAFS_HM_T_00030063	1412.1	1431.1	1486.8	1452.2	1528.7	1584.3	1593.6	1652.8	1599.9
CAFS_HM_T_00075413	2554.3	2588.6	2614.7	2706.3	2757.3	2765.5	2571.4	2618	2635.6
CAFS_HM_T_00031815	3995.1	3909.9	3977.9	4496.1	4248.5	4453.9	3893.2	3872.9	4006.4
CAFS_HM_T_00033012	1333.4	1270	1212.9	1334.9	1311	1359.8	1411.8	1363.2	1376.1
CAFS_HM_T_00064025	1627.8	1612.9	1528.9	1623	1792	1552.4	1376.6	1414.9	1348.1
CAFS_HM_T_00082589	2381.4	2399	2446.6	2422.9	2427.5	2403.7	2403	2418.6	2406.4
CAFS_HM_T_00042046	1779	1736.8	1763.1	1760.1	1779.9	1770.9	1794.2	1750.6	1849.7
CAFS_HM_T_00074519	1698.5	1694.5	1751.7	1748.4	1783.1	1884.9	1917.5	1935.9	1947.8
CAFS_HM_T_00074129	2303.7	2389.9	2351.9	2189.2	2122.7	1964	1658.9	1737.6	1617.5
CAFS_HM_T_00061271	992.5	1065.2	1004.2	946.2	979.2	819.6	836.3	804.3	789.8
CAFS_HM_T_00064318	1210	1206.3	1200.2	1208.6	1245.3	1277.3	1306.2	1274.9	1315.4
CAFS_HM_T_00046809	3105.1	3150.9	3158.3	3145.6	3211.3	3157.2	3398.3	3528.3	3528
CAFS_HM_T_00062114	2724.7	2790.5	2676.2	2788.5	2722.5	2808.3	2766.8	2809.5	2745.5
CAFS_HM_T_00069554	752.6	726	738.6	741.6	751.3	767	740	746.2	727.4
CAFS_HM_T_00074523	2894.5	2986.8	2856.8	3007.6	3078	3043.4	3148.6	3246.7	3161.1
CAFS_HM_T_00072763	1868.5	1828.4	1811.3	1803.4	1833.9	1879	1986.5	1966.3	1990.7
CAFS_HM_T_00011974	2044.4	2083.7	2025.2	1827.3	1871.3	1794	1795.8	1806.3	1842.9
CAFS_HM_T_00085399	1892.7	1758.4	1811.8	1847	1879.5	1896.7	2100.2	2094.8	2201.1
CAFS_HM_T_00059251	2875.7	2917.5	2932	2776.8	2645	2736.7	2682.5	2782.3	2701.3
CAFS_HM_T_00075301	1871.7	1804.5	1875.4	1925.5	1854.7	1902.1	1941.2	1832	1940.7
CAFS_HM_T_00026802	3055	2900.5	2949.5	2585.2	2810.8	2682.1	2650.5	2596.6	2550.5
CAFS_HM_T_00092266	1721.4	1691.1	1762.8	1752.7	1822	1865.6	1760	1905.4	1852.7
CAFS_HM_T_00014881	1941.8	1971.6	2008	1912.3	1927.6	1990.8	1991.7	2003	2033
CAFS_HM_T_00052115	1703.8	1748.4	1746.4	1618.1	1752.7	1721	1640.2	1712.2	1678.6
CAFS_HM_T_00067746	3239.5	3133.7	3245.8	2910.2	2842.6	2930.6	2911.7	2965.5	2984.7
CAFS_HM_T_00013217	2140.9	2154.2	2134.7	2227.7	2159.7	2255.4	2262.6	2207.6	2271.2
CAFS_HM_T_00028403	105.2	98.7	95.9	94.7	106.5	112.2	105.7	114.3	111.8
CAFS_HM_T_00077299	2618.3	2611.4	2560.3	2627.8	2655.6	2760	2796.6	2720.9	2739.6
CAFS_HM_T_00049002	2393.2	2233	2254.5	2274.6	2181.7	2236.4	2258.9	2258.3	2288.6
CAFS_HM_T_00051621	1530.9	1517.5	1504.8	1429.7	1521.7	1496.7	1501.6	1505.3	1511.7
CAFS_HM_T_00071997	82.9	98.5	88.7	96.1	82.5	84.7	93.1	85.5	84.2
CAFS_HM_T_00057818	1477.4	1426.6	1484.6	1473	1420.2	1476.7	1456	1491.8	1529.7
CAFS_HM_T_00034062	2062.2	2049.5	2042.9	2077.6	2131	2102.2	2120.4	2105.4	2123.6
CAFS_HM_T_00004427	2087.9	2039.4	1981.3	2235.9	2107.2	2071.6	2380.8	2410	2423.6
CAFS_HM_T_00085466	2237.1	2201.4	2209.2	2242.6	2309.4	2354.1	2490.9	2481.6	2541.8
CAFS_HM_T_00045398	3255.7	3306.2	3253.5	3534.7	3398.1	3401.3	3651.8	3641.8	3567.4
CAFS_HM_T_00091984	2103.4	2174.4	2167.7	2124.8	2196.9	2233.7	2290.1	2249.6	2397.3
CAFS_HM_T_00009540	2215.3	2354.7	2095.3	2386.8	2286.6	2424.9	2269.9	2329.8	2186.1
CAFS_HM_T_00062930	1637.8	1610.3	1583.5	1604	1681.9	1615.3	1519.5	1555.5	1580.6
CAFS_HM_T_00013218	1368.6	1380.5	1323.8	1321.6	1311.3	1419.4	1178.7	1204	1203.4
CAFS_HM_T_00012580	3508.6	3474.8	3618.8	3303.6	3493.5	3588.6	3543.1	3738.2	3687.3
CAFS_HM_T_00047828	806.3	789.8	788.6	836.8	803.4	843	827.5	816.6	845.8
CAFS_HM_T_00019822	1277.6	1291.5	1197.2	1248.3	1255.3	1205.1	1162.5	1243.9	1203
CAFS_HM_T_00015779	2760.6	2686.6	2689.7	2709.1	2923.1	2805.3	2971.1	2867.7	2886.9
CAFS_HM_T_00052091	2894.1	2901.9	2803.9	2585	2721.4	2554.5	2414.4	2338	2380.6
CAFS_HM_T_00028194	1567.3	1673.2	1609.2	1696.4	1697.9	1679.5	1633	1662.1	1587.3
CAFS_HM_T_00031109	1412.6	1404.7	1364.6	1424.4	1514.6	1431.5	1431.7	1445.6	1437.6
CAFS_HM_T_00059792	1506	1591.2	1543.1	1572.7	1613.2	1631.7	1591	1590.2	1607.1
CAFS_HM_T_00092107	826.7	803.8	765.9	650.9	792.8	589	508	528.9	534.1
CAFS_HM_T_00060556	1798.4	1812.7	1765.2	1839	1913.6	1858.4	1895	1900.9	1919.5
CAFS_HM_T_00088951	1464	1414.8	1493.9	1306.7	1431.2	1453.2	1467.6	1459.7	1558.4
CAFS_HM_T_00005939	361.4	366.9	355.2	347.1	361.8	392.9	365.6	380.9	370.3
CAFS_HM_T_00029017	3023.1	2995.2	2974.2	3000.4	2979.5	3025.2	2961.5	3014.6	3074.1
CAFS_HM_T_00052945	1067.5	1098.5	1087.2	1034.8	1039	1097.6	1041.8	1081.1	1083.2
CAFS_HM_T_00004595	2234.5	2207.9	2190.5	2195.2	2220.6	2198.3	2125.4	2151.1	2156.6
CAFS_HM_T_00033554	2372.4	2447.7	2639.3	2274.5	2542.7	2563.2	2557.2	2407.3	2612.1
CAFS_HM_T_00040812	667.9	692	717.2	680	671.2	710.4	669.6	696.2	680.8
CAFS_HM_T_00033991	2903.7	2910.6	2804.9	3156.7	3065.8	3087	2745.5	2668.5	2711.5
CAFS_HM_T_00080065	2952.7	2873	2891	2924.7	2986	3110.5	2662.3	2870.8	2754.6
CAFS_HM_T_00076764	2084.1	2082.5	2032.2	2157.5	2138	2167.7	2194.4	2245.2	2240.8
CAFS_HM_T_00025026	3007.7	3016.7	3100.2	2889.7	2644.7	2770	2808.9	3072.3	3034.3
CAFS_HM_T_00089687	1240.5	1223.8	1233.5	1328.3	1339.5	1389.7	1528.7	1494.6	1541.7
CAFS_HM_T_00074674	3025.2	3054.8	2937	2928	2942	2890.8	2765.4	2929.7	2821.9
CAFS_HM_T_00034064	1809	1811.9	1717.8	1730.3	1712.2	1655.7	1334.2	1431.4	1298
CAFS_HM_T_00056934	2754	2581.8	2744.1	2600.2	2548.4	2206.1	1798.5	1921.6	1783.8
CAFS_HM_T_00065854	1944.8	2010.9	1827.4	1729.5	1800.5	1429.2	1153.6	1189.8	1095
CAFS_HM_T_00011709	1840	1772.1	1816.6	1770.4	1874.8	1812.7	1980.7	1890.3	1915.6
CAFS_HM_T_00029710	2295.6	2245.4	2295.4	2013.9	2245.1	2057.2	1743.4	1819.6	1776.9
CAFS_HM_T_00027515	578.8	543.5	558.5	620.6	610.8	638.8	630.1	606.7	621.8
CAFS_HM_T_00027096	3169.3	3363.3	3226.1	3394.8	3311	3458	3389.6	3539.9	3455.9
CAFS_HM_T_00082762	1971.1	1974.8	1943.2	2034.7	1991.1	2008.4	1990.4	1971.2	1976.4
CAFS_HM_T_00013890	2110.2	2079.6	2084	2223.4	2187.2	2214.4	2271	2264.1	2195.2
CAFS_HM_T_00001144	1423.1	1396.1	1462.6	1468	1509.8	1534.5	1577.9	1570.8	1613.6
CAFS_HM_T_00074314	1646.4	1657.7	1628.6	1782.4	1769.3	1709	1725.3	1744.2	1726.2
CAFS_HM_T_00086450	845.8	865.7	865	802.2	855.3	806	857.2	905.1	871.4
CAFS_HM_T_00015448	3949.3	3882.2	3885.6	3765.6	3948.5	3864.8	3802.2	3852.3	3852.5
CAFS_HM_T_00014612	2039.3	2041	2054.2	2084.2	2053.6	2045	2163.2	2124.6	2116
CAFS_HM_T_00010684	1715.6	1714.1	1746.8	1543.6	1484.4	1445.7	1611.2	1601.9	1628.9
CAFS_HM_T_00073078	1997.9	2010.5	1962.6	2025	2030.5	2093.8	2111	2213	2199.2
CAFS_HM_T_00057233	1516.4	1524.4	1453.1	1640.3	1580	1569.4	1460.9	1613.9	1504.3
CAFS_HM_T_00078343	2128.7	2065.2	2096.2	1946.4	1986.9	1941.8	1831.9	1879.6	1884.2
CAFS_HM_T_00010311	2624.4	2512.2	2694.1	2364.5	2350.3	2364.8	2621.6	2692.1	2744.2
CAFS_HM_T_00040002	1922.8	1918.4	1947.8	1939.8	1986.5	2072.8	2038.1	2089.4	2049.3
CAFS_HM_T_00015700	1362.3	1361.7	1354.6	1410.1	1449.1	1401.4	1402.3	1389.1	1398.3
CAFS_HM_T_00006502	2273.2	2305.9	2323	2174.7	2237.3	2207	2271.3	2264.1	2235.5
CAFS_HM_T_00024516	752.6	756.4	759.6	778.5	841.6	842.9	829.1	822.6	851.7
CAFS_HM_T_00065937	3323.3	3312.3	3506.1	3485.8	3442.8	3585.1	3616.5	3593.7	3506.3
CAFS_HM_T_00005063	2154.3	2096.8	2027.4	2044.8	2049.7	2120.1	2375	2327.8	2388.5
CAFS_HM_T_00020422	1647	1722.6	1713.5	1696.3	1738.7	1673.7	1627.2	1663.1	1704.1
CAFS_HM_T_00016510	2269.1	2187.3	2150.7	2085.6	2196.3	2140.9	2179.7	2327.7	2204.1
CAFS_HM_T_00061499	3344.1	3430.7	3323.4	2967.5	2982.6	2476.2	1873	1977.6	1839.7
CAFS_HM_T_00084075	3753.5	3828.6	3788.7	3641.8	3743.5	3850.4	3868.9	4057.3	4002.3
CAFS_HM_T_00072533	1494.1	1459.5	1449.7	1521.4	1497.1	1568.5	1550.8	1535.6	1477.2
CAFS_HM_T_00036899	2675.3	2687.1	2438.6	1730.8	2784	1321.8	1118.8	1049.7	1013.8
CAFS_HM_T_00026076	113.2	120.5	112.1	111.1	104.6	94.4	113.2	101	104.5
CAFS_HM_T_00054757	1105.5	1113.3	1149.4	1094	1164.3	1129	1066.7	1121.9	1122.8
CAFS_HM_T_00063581	1703.9	1658	1627	1700	1662.8	1640.7	1778.3	1645.6	1721.6
CAFS_HM_T_00087865	1946.8	1944.3	1831.2	1422.4	1343.5	1156.9	1143.6	1114.4	1127.2
CAFS_HM_T_00082216	2165.3	2225.1	2157.7	2137.9	2153	2176.7	2308.9	2394.3	2313.9
CAFS_HM_T_00034327	2391.5	2451.7	2345.2	2553.6	2550.2	2486.4	2519.1	2501.8	2547.4
CAFS_HM_T_00084358	1357.3	1395	1335.7	1333.4	1423.2	1391.4	1371	1351.8	1373.9
CAFS_HM_T_00039746	1091.7	1133.1	1084.3	1117.3	1124.1	1062	1052.6	1102.5	1031.2
CAFS_HM_T_00022543	3042	2993.1	3241.6	2958.3	3107.3	3209.9	3299.9	3329.7	3335.5
CAFS_HM_T_00052672	2937	2791.7	2818.9	2608.5	2749	2670.7	2617.2	2641.1	2671.8
CAFS_HM_T_00048834	1718.8	1670.3	1742.3	1813.5	1752.8	1771	1731.8	1832.3	1728.1
CAFS_HM_T_00028163	2082.2	2080.9	2081.8	2219.9	2077.2	2237.8	2115.8	2244.9	2159.6
CAFS_HM_T_00011215	2255.1	2193	2185.8	2163.2	2243	2241.4	2363.1	2362.1	2334.1
CAFS_HM_T_00056507	2686.1	2815.9	2702.4	2374.3	2283.2	2190.6	1959.4	2061	1950.6
CAFS_HM_T_00028772	1520	1494.7	1481.1	1547.2	1544	1565	1598.9	1631	1560.4
CAFS_HM_T_00027638	460.6	466.1	478.7	451.6	457.4	449.1	458.7	440.6	447
CAFS_HM_T_00074678	2679.9	2650.4	2561.8	2708.4	2716.1	2846.2	2853.1	2791.6	2827.7
CAFS_HM_T_00064123	3546.5	3743.8	3377.3	2439.9	2676.9	1656.9	1127	1091	1041.2
CAFS_HM_T_00008575	1793.2	1843.2	1794.3	1980.8	1972.9	2069.6	2200.9	2254.1	2168.9
CAFS_HM_T_00053871	1658.4	1745.4	1861.6	1770.1	1825.6	1974.7	1812.4	1942	1905.2
CAFS_HM_T_00053358	1311.1	1269.5	1320.8	1345.3	1310.4	1397.5	1433.9	1389.1	1425.4
CAFS_HM_T_00045469	2351.5	2345.1	2469.6	2408.7	2466.9	2682.4	2585.5	2688	2696.5
CAFS_HM_T_00036835	1764.2	1767.3	1711.3	1704.2	1741.1	1728.4	1696	1708	1747.9
CAFS_HM_T_00083157	542.6	548.1	571.5	552.2	531.4	525.9	546.5	541.8	536.3
CAFS_HM_T_00028625	3171.1	3116.4	3168.5	3229.1	3261.6	3281.1	3379.2	3411.8	3353.7
CAFS_HM_T_00069163	2277.4	2251.8	2361.8	2426	2466.8	2541	2704.8	2667.4	2788.6
CAFS_HM_T_00082869	370.4	364.1	330.5	358.6	360.6	327.9	355.6	382.6	371.7
CAFS_HM_T_00050818	1009.2	1052.3	1013.5	979.4	998.8	1032.9	1024.2	1025.4	1020.9
CAFS_HM_T_00038172	792.6	770.8	773.4	773.1	737.1	784	818.1	807	785.1
CAFS_HM_T_00034902	145.6	143.9	150.1	153.8	154	158.5	156.5	147.4	171.1
CAFS_HM_T_00052121	148.7	131.4	130.3	167.9	151.4	154.8	131.2	128.8	140.6
CAFS_HM_T_00073918	1866.5	1815.5	1787.8	1815.5	1849.9	1769.7	1787.5	1821.2	1813.1
CAFS_HM_T_00040216	1639.8	1628.7	1658.6	1691.2	1674.6	1654.9	1672.5	1679.4	1692.6
CAFS_HM_T_00049301	1317.7	1355.6	1381.2	1463.7	1487.7	1546.5	1549.9	1521.7	1564.1
CAFS_HM_T_00076300	2467.4	2464.4	2456	2634.1	2585.4	2615.3	2575.2	2534.3	2606.8
CAFS_HM_T_00048201	678	651	657.1	583.7	616.2	623.4	653	647	672.4
CAFS_HM_T_00009332	2801.7	2794.8	2624.2	2064.6	3382.1	2140.8	1833.8	1852.9	1877
CAFS_HM_T_00059157	491.5	486.2	514.5	525.5	449.6	505.7	437.8	450.4	495.8
CAFS_HM_T_00021549	2105.1	2096.2	2044.4	2110.7	1879.2	1814.2	1820	1798.3	1732.1
CAFS_HM_T_00040372	989.6	1041.7	1019.7	1029.9	1009.8	1060.2	1046.8	1069.3	1066.8
CAFS_HM_T_00034325	2683.1	2604.8	2632.7	2946.6	2736.7	2892.5	2878.5	2734	2809.7
CAFS_HM_T_00081039	1882.9	1938.9	1934.9	2067.5	1948.6	1945.7	2050.6	2083.4	2074.1
CAFS_HM_T_00036378	2902.2	2818.4	2819.5	2560.1	2887.9	2572.5	2322.3	2337.3	2392
CAFS_HM_T_00013239	1578.9	1542.9	1602	1553.8	1572.1	1611.4	1622.1	1649.6	1664.1
CAFS_HM_T_00023274	2407.6	2460.8	2314.4	2568.5	2528.7	2475.5	2524.1	2555.9	2461.6
CAFS_HM_T_00045368	1372	1419.7	1356.2	663.6	780.7	707.9	574	600	581.9
CAFS_HM_T_00027634	2610	2443.4	2426.1	2490.9	2472.3	2500.6	2724.7	2501.8	2663.1
CAFS_HM_T_00076952	2355.9	2208.7	2220.5	2214.1	2200.5	2223.6	2341.6	2422	2386.6
CAFS_HM_T_00018460	1515.8	1551	1627.3	1651.2	1619.4	1653.8	1534.5	1742.3	1523.6
CAFS_HM_T_00018748	608.2	594.4	581.1	612.9	615.6	681.4	652.7	633.5	645.8
CAFS_HM_T_00009089	1451.8	1404.7	1490.7	1447.3	1539.1	1602.7	1649.9	1604.2	1688.7
CAFS_HM_T_00074135	1013.8	970.1	1010.5	990.2	975.2	988.2	966.7	963.5	928.3
CAFS_HM_T_00029894	77.9	81.7	79.9	88	88.7	85.1	77.4	70.9	81.2
CAFS_HM_T_00013227	1856.1	1827.4	1850.2	1841	1854.2	1828.7	1798.7	1824.9	1822.7
CAFS_HM_T_00025150	2023.6	1977.4	2031.2	1944.1	1929.5	2011.3	2034.6	2039.2	1995.9
CAFS_HM_T_00057283	2362.3	2370.4	2347.9	2373.7	2362.7	2415.4	2553.8	2488.6	2511.8
CAFS_HM_T_00078043	2726.2	2531.8	2739.4	3433.1	3185	3271.2	3556.6	3578.8	3439.5
CAFS_HM_T_00082332	1658.4	1627	1561.1	1421.7	1391.3	1294.1	1215	1208.3	1238.6
CAFS_HM_T_00004769	529.4	503.4	525.3	494	529	479.5	497	497.8	504.8
CAFS_HM_T_00084251	1487.4	1505.9	1425.8	1522.5	1489	1524.2	1572.1	1555.2	1547.1
CAFS_HM_T_00021212	2884.7	2722.4	2780.7	2670	2733.9	2735.4	2946.2	2856.4	2884.2
CAFS_HM_T_00069373	523	522	591.7	502.2	533.8	537.6	606.4	572.6	602.4
CAFS_HM_T_00061447	3058.8	2921.3	2937.2	3007.4	2951.6	3066.6	3068.4	3081.2	3104.2
CAFS_HM_T_00015597	3004.7	2858.3	2742.4	3000	2893	2902.8	3116	3026.4	2992.2
[truncated: 4,796 more rows]

## Sheet: Brain
Table S3. All quantified proteins in liver and brain of Hypophthalmichthys molitrix.
Protein	ck_0h_1	ck_0h_2	ck_0h_3	hy_5h_1	hy_5h_2	hy_5h_3	re_5h_1	re_5h_2	re_5h_3
CAFS_HM_T_00091449	63721.1	65008.2	63424.7	62194.2	63364.3	62791.2	62787.2	63641.7	63257.9
CAFS_HM_T_00052219	65985.8	67587	70188.4	66301.7	62397	66827	67051.4	65572.7	66244.8
CAFS_HM_T_00052961	47165.2	48834.2	49161.5	46481.4	44487.4	48215	47542.3	46301.7	47598.7
CAFS_HM_T_00028830	51605.2	54873	49340.2	46340.4	47679.6	53183.3	52336.3	44569.4	51363.9
CAFS_HM_T_00007488	8523.2	8485.1	8944.8	8598.5	8694.6	8799.1	8825.5	8531.9	8560.1
CAFS_HM_T_00086417	6307.7	6146.7	6642.5	6155.9	6319.3	6301.6	6580	5973.5	6275.8
CAFS_HM_T_00065840	26554.5	24352.1	28358.4	26631.9	26430.2	25068	25585.6	27844.6	26922.3
CAFS_HM_T_00084393	14880.1	15687.7	14985.2	13615.5	13683.8	15858.4	15879.5	14054	14339.3
CAFS_HM_T_00062319	46751.7	47459.8	43299.8	39439.6	37170	44180.1	44258	40504.2	43749
CAFS_HM_T_00030340	11823.1	11664.8	12222.9	11781.3	11763	11891.1	12130.4	12199.1	11461
CAFS_HM_T_00043379	21536.5	21685.7	21975	21704	20954.3	22799.3	21641.7	21476.4	21925.1
CAFS_HM_T_00079305	17172.2	18017.9	16549.3	15165.8	15421.9	17005.3	16968.1	15109.3	15988.1
CAFS_HM_T_00071148	9498.1	9468.9	9801.9	9524.2	9437.5	9448.6	9311.7	9583.9	9648.2
CAFS_HM_T_00053889	31750.9	32752.4	32183.3	31660.4	30490	32677.1	32529.6	30225.3	30972.2
CAFS_HM_T_00054151	3142.7	3172.2	3390.7	3150.7	3146.1	3395.6	3466.1	3124.6	3140.5
CAFS_HM_T_00010561	18651.9	17993.9	18764.2	18476.3	18212.9	17669.4	18002	18055.6	18397.2
CAFS_HM_T_00063456	13083.1	12960.6	13003	12997.4	12598.8	12700.9	13182.9	12724.8	12874.8
CAFS_HM_T_00033881	34883.8	38050.7	36628	35605.1	32770.2	37632.8	36452.5	34727.9	35613.9
CAFS_HM_T_00057653	2705.9	2740.1	2882.2	2640.9	2727.7	2841.6	2868.5	2777.8	2765.8
CAFS_HM_T_00079515	2779	2839.6	2747.9	2595.5	2608.8	2931.1	2980.3	2658	2736
CAFS_HM_T_00052182	26970.1	26666.4	28567.1	26214.8	25556.7	27985.3	27814.8	26126.6	26332.1
CAFS_HM_T_00068134	18986.5	20222.6	17372.9	17027.9	16897.9	18484	17819.6	16798.4	17812.6
CAFS_HM_T_00059705	5410.1	5664	5208.8	5483.8	5456.2	5736.1	5448.5	5590.1	5590.6
CAFS_HM_T_00047699	15486.2	16614.1	17440.3	15449	15263.1	16222	16680	15808	15212.9
CAFS_HM_T_00068886	13920.5	13994.3	13494	13443.7	13498.4	13717.2	13499	13409.4	13243.7
CAFS_HM_T_00067933	4920.1	5293.7	4753.8	5223	5074.5	5162.3	5169.7	5130.3	5202.7
CAFS_HM_T_00018469	15325.1	15770	15400.5	15595.5	15437.1	14894.7	14945.4	15348	15404.5
CAFS_HM_T_00090940	20232.7	20698.8	20183.8	20499.5	20736	20125	21084.1	20571.8	20659.4
CAFS_HM_T_00088194	13028	13365.3	13283.7	12698.5	12447.1	13608.7	12810.5	13142.2	12526.2
CAFS_HM_T_00079514	4423.1	5155.6	4624.3	5341.2	4449.6	4985.6	4731.3	4489.6	4508.3
CAFS_HM_T_00073631	28837	29552.1	31331.1	29560.4	28427.3	31651.1	30446.8	29606.4	29768.2
CAFS_HM_T_00056473	24649.2	26074.2	25993.7	24560.3	24009.4	26533.6	26707.1	24481.9	23727.9
CAFS_HM_T_00004099	14951.3	15511.4	15692.8	15090.6	15287.5	16440.3	16454.1	15386.8	15506.5
CAFS_HM_T_00091877	16171.1	17276.8	17255.8	15776.4	15645.6	16329.5	16192.4	14463.1	15907.8
CAFS_HM_T_00000561	3767	3942.7	4294.2	4007.9	3978.4	4248.7	4509.5	3681.1	4173.5
CAFS_HM_T_00002604	12776.5	12612.5	11754.6	12110.9	12176.3	12592.9	12373.3	12726.5	13075.2
CAFS_HM_T_00029551	19367.9	19116.7	19379.9	19647.8	19469.8	18361.4	18963.3	19369.6	18889.3
CAFS_HM_T_00058041	19626.3	20324.1	21101.6	19548.3	19774.5	21017.6	21126.3	20272.2	20107.2
CAFS_HM_T_00075212	18043.3	17772.6	17881.4	17365.3	17384.9	17069.1	17367.7	16671.3	17094.6
CAFS_HM_T_00069897	8862.7	9431.8	9198.9	9645.5	9243	9669.2	9571.3	9189.2	9058.3
CAFS_HM_T_00026484	14806.2	14303.1	14853.1	15256.9	15073	14239.5	14687.5	15573.9	15363.7
CAFS_HM_T_00066674	14464	14729.1	15031.6	14532.8	14570.5	14940.4	14941.3	14424.9	14483.1
CAFS_HM_T_00010536	22688	21581.7	21651.7	22063.1	21501.3	20465.3	20394.1	22324.8	21364.1
CAFS_HM_T_00051391	32047	32227.3	32192.3	30081.9	30696.4	31299.1	31182.8	30035.2	31955
CAFS_HM_T_00067028	8518.3	7933.9	8336.5	8052.7	8460	8201	8478.9	7956.2	8046
CAFS_HM_T_00045771	17492.7	17690	17408.9	17529.8	17979.9	17324	18084.8	17835.9	18384.2
CAFS_HM_T_00006824	11704.9	11329.9	11029.3	11288.2	11108.8	11937.4	11373	11647.9	12443.9
CAFS_HM_T_00021966	18468.8	18256.9	18353.2	18470.7	18284.4	18273.4	18648.7	18593.5	18205
CAFS_HM_T_00056689	12085.3	12197.2	12172.3	12082.1	12077.1	12069.3	11739.8	12431.8	12328.3
CAFS_HM_T_00021076	20216.3	20237.3	19553.5	19781.3	19898.2	19643	19653.9	19792.2	19423.3
CAFS_HM_T_00065957	9217.9	9404	9769.4	9375.7	9374.6	9793.9	9515.3	9497.2	9469.7
CAFS_HM_T_00032924	11874.9	11784.3	11776.7	11621.2	11533.3	11715.5	11313.8	12116.1	11400.9
CAFS_HM_T_00048923	13712.6	12766.4	13303.3	12878.6	12523.3	12751.8	12593.1	12789.3	12886.5
CAFS_HM_T_00069903	4992.4	5981.4	4361.6	5640	5693.9	5058.8	5188.3	5230.8	5176.2
CAFS_HM_T_00067579	935	1038.5	976.1	1317.3	1078.6	11792.9	1014.3	1748.7	1032.3
CAFS_HM_T_00004114	6499	7139.5	5697.6	7264.6	7295.4	7103.9	7473.7	7160.2	7243.9
CAFS_HM_T_00082002	16430.4	16881.2	16306.6	16025.1	16320.9	17242.9	17461.1	15577.2	16633.3
CAFS_HM_T_00056393	13491.3	13461	13147.3	13480.5	14304.1	14640	13836.1	14113.6	14488.4
CAFS_HM_T_00001368	28033.9	28113.9	19173.3	26581.7	26302.6	22870.2	20488.1	21732.6	20639.1
CAFS_HM_T_00041092	3146.6	3407.8	3364.5	3347.3	3120.7	3462.1	3591.5	3121.7	3204.6
CAFS_HM_T_00073543	3335.1	3332.8	3473.5	3252.4	3408.8	3421.5	3361.9	3208.6	3162
CAFS_HM_T_00062741	16269.7	14449.1	16161.5	15729.1	14047.2	15088.9	14307.5	15458.5	15222.9
CAFS_HM_T_00043863	20750.3	20746.6	20906.8	19799.1	19983.7	21065.9	21473.7	19293.9	20321.5
CAFS_HM_T_00075979	4956	4939.8	4914.5	4448.2	4412.1	5269.7	5271.9	4443.6	4713.4
CAFS_HM_T_00067645	9637.6	9584.7	9887.4	8842.5	7455.5	9636.8	8679.7	8878.9	9407.4
CAFS_HM_T_00015632	13382.7	12709.6	12778	12026.6	13283.9	11953.5	14219.2	11874.5	12632.3
CAFS_HM_T_00065215	12551.8	12772.5	12787.6	12431.8	12606.3	12160.4	12759.1	12061.8	12570.9
CAFS_HM_T_00051111	21844.1	22705.9	22917.3	22034.3	22041.1	23268.7	24030.8	21835	22183.5
CAFS_HM_T_00057299	15921.4	16270.9	16414	15953	15892.5	16163.7	15998.2	16332.8	16489.3
CAFS_HM_T_00071147	359.8	335.5	297	382.3	676.3	325.9	669.8	319.5	353.6
CAFS_HM_T_00081042	27955.9	24648.2	27849.3	26536.8	28838.9	28616.6	28495.3	23029.7	28371
CAFS_HM_T_00017527	7573.1	8059.6	8172.2	7537.3	8083.9	8653.9	8321	7546.1	7848.8
CAFS_HM_T_00084104	13747.9	14029.7	13521.6	14057.9	13066.8	12942	13014.4	13972.8	13554.4
CAFS_HM_T_00087005	9543	9337.8	9393	9407.9	9390.9	9816.5	9686.7	9671.7	9758.8
CAFS_HM_T_00015397	16911	16511.8	16964.3	16694.8	17128.7	15989.6	16831.8	16731.2	16757.8
CAFS_HM_T_00069913	1260.3	1124.1	1112.1	1389.3	1201.5	1173.9	1068.8	1317.9	1220.5
CAFS_HM_T_00076151	4995.1	4659.7	4995.7	4919.8	4990.2	4748.5	5017.9	4800.4	5068.3
CAFS_HM_T_00013278	15375.5	14952.7	15957.5	15237.9	15073.3	15570.2	15662.5	14416.7	15044.6
CAFS_HM_T_00058972	16711.2	17307.9	18155.7	16086.7	17314.8	17774.4	17626.5	17362.3	17097.8
CAFS_HM_T_00090042	13769.2	12725.7	13903	13390.1	13300.2	13000.3	13041.8	13995.7	13524.4
CAFS_HM_T_00043022	11096.8	11523.2	10607.6	10523.2	10340.4	10844.1	10956.3	9949.9	10553.5
CAFS_HM_T_00070234	7326.1	7264.7	7868.5	7788.4	7533.2	7172.5	7077.8	8133.6	7610.9
CAFS_HM_T_00038448	10995.7	10788.3	10839.3	10997.8	11132	11474.1	9680.3	11749	11528
CAFS_HM_T_00086975	36674	39806.8	36211.4	30185.7	30216.4	39669.4	41731.9	29878	34668.1
CAFS_HM_T_00067593	628.3	654.2	607.8	670.9	710.2	1845.2	618	689	636
CAFS_HM_T_00053565	10286.5	9652.8	10736.1	10308.5	9984.1	9755.4	9914.5	10069.8	10090.5
CAFS_HM_T_00056411	12788.4	12862.3	12443.5	12887.7	13218.5	12541.7	12535.8	13025.6	12709.6
CAFS_HM_T_00038503	11443.4	11008.9	11673.7	11186.3	11286.5	11676.2	11887.5	11257.8	11775.7
CAFS_HM_T_00067332	16514.3	18913.3	15130.6	15153	15846.4	16752.2	17226.4	16017.3	17161.3
CAFS_HM_T_00065858	62779.5	58055.3	81177.2	68837.7	66524.1	81733.1	80682.7	62407	73560.8
CAFS_HM_T_00040120	6621.7	6723.3	6191.4	6275.9	6405.8	6345.6	6806.7	5896.3	6256.1
CAFS_HM_T_00063233	17316.8	17576.1	17658.6	17356.5	17008.2	17282.9	17458.6	16771.7	17365.6
CAFS_HM_T_00052531	23614.2	24042.2	23596.8	23185.5	22728.9	23622	24181.3	22869.7	23090.9
CAFS_HM_T_00048524	16426.1	16581.1	16779.7	15933	14673.6	15286.6	14920	15193	15612.8
CAFS_HM_T_00050340	20540.3	24218.7	19994	16960.9	17630.9	23873.2	22552.2	16722.9	21494.8
CAFS_HM_T_00004622	21457.4	21729.7	22166	21212.3	20757.7	21927.1	22668.9	20434.2	20634.8
CAFS_HM_T_00033529	13247.7	15358.8	10535.5	11930	20007.1	14208.3	13260.4	9159.6	11769.5
CAFS_HM_T_00053188	14323.3	11687.4	16681.7	14798.6	13274.2	11856.5	11919.1	15248.4	13694.1
CAFS_HM_T_00036291	11118	10665	10712.6	10542.8	10636.5	10892.6	11077.3	10445.9	10864.6
CAFS_HM_T_00074324	6902.2	6850.5	6506.7	6576.5	6458.1	6432.4	6876.3	6640.9	6788.7
CAFS_HM_T_00026478	12258	12217.8	13141.7	12568.7	12353.8	13731.3	12820.1	12809.3	12677.4
CAFS_HM_T_00042609	9965.1	10048.8	10365.7	9897.9	9315.4	9940.2	9868.1	9610.8	10131.1
CAFS_HM_T_00090276	3537.2	3165.4	3852.9	3476.3	3409.3	3174	3146.3	3536.9	3436.9
CAFS_HM_T_00028516	10709	10697.6	11128.7	10325.1	10539.9	11051.5	11157	10776.6	11031.5
CAFS_HM_T_00068730	3422.1	3396.9	3522.6	3534.1	3606.5	3518.2	3601.4	3654.3	3554.5
CAFS_HM_T_00060369	8463.8	8160.2	8738.2	7837	8022.7	8100	8266.7	7803.5	8092.6
CAFS_HM_T_00040335	13145.2	11780.7	13780.5	12862.3	12967	12206.2	12855.4	12868.7	12901.5
CAFS_HM_T_00010012	14204.7	13932.1	13739.7	13196.1	13725.8	13201	14021.8	13858.6	14116.3
CAFS_HM_T_00020784	14739.6	14733.6	14651.6	14411.3	14826.1	14787.5	14665.6	14846.1	14741.1
CAFS_HM_T_00058095	11902.2	12157.5	11263.9	11303	12036	13605.2	12242.8	11404.9	13503.6
CAFS_HM_T_00053119	9872.4	9412.7	10149.7	10203.8	10291.8	10210	9616.3	10463.6	10406.7
CAFS_HM_T_00037540	11411.5	11240.6	11263.6	11572.2	11760.1	11300.6	11364.5	11835.8	11784.3
CAFS_HM_T_00064928	4698.5	4876.8	4743	4865.1	4823	4906.8	5127.8	4757.3	4630.8
CAFS_HM_T_00066950	11372.7	12883.6	11883.1	11111.8	10656.5	11971.7	12142.8	10764.4	11660.5
CAFS_HM_T_00016615	9632.9	9138.7	8989	8770.3	9157.1	10148.8	9182.8	9669.3	10700.3
CAFS_HM_T_00028012	7181	7346.9	7279.4	7016.5	7482.8	7856	7464.9	7653.6	7637
CAFS_HM_T_00054400	8777.7	8527.5	8470.5	8413.5	7240.7	7882	7804	7934.8	7923.8
CAFS_HM_T_00018279	9289.5	9918	9939.1	9885.2	9760.7	9679.9	10305.8	9347.2	9724.8
CAFS_HM_T_00050332	14298.2	13897.2	14168.1	13360.6	13649	13664.5	14391.2	13378.9	13672.8
CAFS_HM_T_00085804	28703.5	39625.7	28652.1	34196.6	31053.6	32991.1	31355.1	29724	29375.1
CAFS_HM_T_00092395	9872.7	9883.7	10218.6	9757.1	10155.8	10362	10580.5	10276.4	9851.9
CAFS_HM_T_00013725	14532.9	14279.1	14236.1	14685.1	15400.8	13580.1	14944.3	13712.3	13869.5
CAFS_HM_T_00090643	12920.3	12457.3	13352.6	13008.7	13100.3	13063	12939.2	13487.1	13230.6
CAFS_HM_T_00017597	10717.2	10258.2	10248.6	10200.5	10251.4	9796.2	10243.8	10150.4	10221.1
CAFS_HM_T_00071452	9538	9206.6	10480.8	9311.8	9923.2	9986.6	10063.9	9300.8	10316.4
CAFS_HM_T_00038054	4006.5	3763.5	3942.8	3929.6	3867.8	3721.3	3649	3826.9	3681
CAFS_HM_T_00017862	13130.7	13689.2	13183.6	12508.7	12604.5	14262	13460.6	12680.6	13524.7
CAFS_HM_T_00013519	18857.8	24143.2	25720.1	16883.3	15827.2	30662.4	21580	15857.8	17878.2
CAFS_HM_T_00057900	7783.9	7778.7	7102	7568.3	7768.9	7110.9	7736.6	7293.8	7484.5
CAFS_HM_T_00050160	13913.5	13960.8	14213.3	13850.3	13008	13282.4	13882.8	13928	14143.6
CAFS_HM_T_00004402	13304.2	13094.3	13085	13572.4	13576.6	12463.1	12623	13014.2	12976.9
CAFS_HM_T_00052088	3821.7	4073.4	3868.8	4144	3756.9	3651.2	3560.5	4000.8	3767.1
CAFS_HM_T_00009810	23328.5	23952.3	23879.6	23555.1	22316.1	23579	23546	22434.2	21919.7
CAFS_HM_T_00034064	9637.9	10302.2	9559.6	9102.2	9671	10804.3	10325.8	9727.6	10265.4
CAFS_HM_T_00057224	17843.1	17151.3	17995.3	17299.6	18763.7	18820.5	17599.2	18567	19681.8
CAFS_HM_T_00050961	6834.2	6584.6	6776.5	6775.6	6810.3	6507.2	6614.4	6605.9	6550.7
CAFS_HM_T_00026431	11917.1	11808.4	11743.1	11629.6	11865.7	11412.4	11643.4	11691	11735.4
CAFS_HM_T_00066554	6124.6	6089	6270.9	6236	6210	5872.1	6173.8	6190.9	5889.9
CAFS_HM_T_00031049	7375.6	7757.1	7359.5	7052	7401.1	7088.3	7339.7	6824.1	7092.4
CAFS_HM_T_00037723	12068.2	12063.7	12147.4	11969.8	12288.1	11327.6	12191.3	10598	11839.9
CAFS_HM_T_00039192	5846.3	5915	6295.9	5818.1	5934.1	6173.3	5726.3	5701.6	5822.1
CAFS_HM_T_00046845	11250.9	10875.4	11050.6	10871.1	11174.8	10662.2	11145	10984.7	10971.4
CAFS_HM_T_00063619	10707.8	10839.8	11451.8	10640.9	10527.5	10687.1	11023.1	10082.4	10545.3
CAFS_HM_T_00001282	284.8	260.9	260.8	235.8	273.2	233.1	251	232.1	253.6
CAFS_HM_T_00088059	13980.4	11407	17978.2	14608.9	11932.3	11441.4	10828.2	15871.9	12493.2
CAFS_HM_T_00088555	12773.6	11828.9	13082.7	13177	12886.2	12337.5	11699.7	13761.4	12788.1
CAFS_HM_T_00080372	11657.6	11497.1	12077.8	12045	12244	11369.8	12055.7	12162.1	12204.4
CAFS_HM_T_00022687	2990.3	2294.2	2521.8	2598.6	2396.6	2435.8	2568	2742.7	2509.9
CAFS_HM_T_00090889	10220.4	10533.3	8645.6	9811.2	9679	9805.7	9872.3	9866.6	10157.2
CAFS_HM_T_00020271	538.8	529.7	547.9	539.1	555.4	560.9	578.3	541.8	575.1
CAFS_HM_T_00053808	12281	12267.3	12479.9	11879	12215.3	11665.5	12451.9	11819.9	12125.7
CAFS_HM_T_00082667	8437.9	8270	8701.6	8549.9	8684.8	8489.9	8315	8440.9	8486.1
CAFS_HM_T_00050289	7994	7860.2	7826	7773.5	7684.1	7476.3	7709.3	7512.8	7705.8
CAFS_HM_T_00038735	9779.4	9158.5	9956.2	9938.8	9805.3	9354	8947.8	10414.2	9769.6
CAFS_HM_T_00035823	7903.8	7678.6	7879.2	8244.7	8448.1	7413.8	7730	8299.1	8021.9
CAFS_HM_T_00038791	837.2	828.1	830.1	860.4	857.9	858	886.2	922.1	910.7
CAFS_HM_T_00065374	6142.9	6098.8	6040	5994.5	6095.6	5915.2	6106.6	6010.3	6224.5
CAFS_HM_T_00078073	17967.5	9673.8	10862.7	11867.9	9208.7	16478.1	7259.3	20449.3	21490.3
CAFS_HM_T_00025682	10473.4	10292.5	10581.2	10457	10423.2	10629.1	10453.7	10650.8	10458.9
CAFS_HM_T_00027947	9696.3	9603.3	9639.9	9309.6	9573.8	9782	10034.3	9422.7	9829.4
CAFS_HM_T_00092212	10357.5	10081.6	10454.6	10032.3	9909.8	9871.1	9961.8	10326	10234.8
CAFS_HM_T_00088307	3050	4026.8	3131.2	4159.5	4166	3379	3078.8	3438.9	3096.5
CAFS_HM_T_00047330	3240	3249.6	3250.4	3384.8	3471.7	3224.6	3311.7	3398.3	3168.6
CAFS_HM_T_00023091	6653.3	6609.3	6499.1	6365.4	6557.2	6371.6	6813.8	6494.4	6440.2
CAFS_HM_T_00049374	8977.5	8750	9201.3	8850.2	8826.6	8934	8942.7	8938.2	9011.9
CAFS_HM_T_00024495	5344.8	4638.3	5362.4	5224.8	4947.4	4667.7	4945.4	5112	5076.3
CAFS_HM_T_00045148	11988.5	12055.8	12035.7	12253.3	12258.5	11476.3	12042	11685.9	12284.2
CAFS_HM_T_00018962	11470.6	11091.1	11091.1	11052.1	11422.6	11415.2	10765.7	12065	11335.6
CAFS_HM_T_00045900	10451.9	10450.2	10471.6	10322.2	10306.6	10402.2	10310.8	10593.7	10657.7
CAFS_HM_T_00035230	14563.1	15118.2	14648.5	14821.2	14617.1	14019.9	15579.6	14811.1	15486
CAFS_HM_T_00016782	10702.9	10901.3	10520.7	10459.7	10425.1	10340.7	10433	10035.9	10185.7
CAFS_HM_T_00030986	13032	10343.8	13076.9	12708.2	12379.9	11615.6	11128.9	13311.3	12773.8
CAFS_HM_T_00061163	12421.3	11941.8	12451.9	12200.5	12139.5	11934.8	12252.6	12245.9	12353.9
CAFS_HM_T_00080493	10745.3	11118.4	10625.4	10714.7	13375.3	10277.9	11685.5	10997.6	11384.1
CAFS_HM_T_00040871	11922.6	14278.8	15353.3	15393	13725.8	14124.3	14782.8	15649.8	15112.4
CAFS_HM_T_00027926	6580.5	6712.9	6549.8	6448	6802	6554.3	6730.1	6629.6	6642.2
CAFS_HM_T_00061384	10515.7	11079.2	9598.7	9635.1	9689.7	10591.6	10532.8	9305.7	9763.9
CAFS_HM_T_00015583	10610	10505.3	10884.9	10439.7	10685.1	10339.4	10378.9	10858.4	10840.2
CAFS_HM_T_00078434	9700.4	9030.5	8652.3	8416.6	7954.4	9501.2	8631.1	8313.9	8519.4
CAFS_HM_T_00063535	9032.3	9218.5	9161.6	9406.9	9419.8	8729	9242.8	8859.3	8623.7
CAFS_HM_T_00084314	12162.3	12071.2	13508.1	12288.3	12385.9	12891.7	13268.1	11563.8	11991.7
CAFS_HM_T_00069911	249.6	391.8	189.2	400.6	430.7	251.4	325.2	309.1	352.1
CAFS_HM_T_00022238	12422.1	12168.2	12692.6	12117.3	12335.2	12514.3	12179.3	12402.3	12231.7
CAFS_HM_T_00090319	9088.5	9104.1	8899.5	9186.5	8976.6	8668.6	8796.4	8752.9	8773.2
CAFS_HM_T_00085296	24365.9	26053.6	25689.4	24982.3	23744.1	25552.5	25627.4	24600.9	25105.7
CAFS_HM_T_00021153	9345.9	9023.4	9071	9207.6	9333.2	8821.4	8436.2	8590.4	8852.4
CAFS_HM_T_00019248	12254.5	11840.2	12088.5	11900.6	12008.9	12087.4	11968	11315	11675.4
CAFS_HM_T_00013914	16878.9	19046.9	18393.5	19428.5	17800.6	18580.9	17329.4	19994.6	19768.5
CAFS_HM_T_00007376	12386.5	12256.7	12636.7	12598.3	12559.5	12316.7	12457	12572	12765
CAFS_HM_T_00073250	11259.7	11480	10967.4	10925.6	10793.6	10998.3	11373.3	10349.6	10737.3
CAFS_HM_T_00062281	7158.1	7498	7190.6	7193.8	7188.4	7246.4	7242.8	7183.8	7510
CAFS_HM_T_00023205	4456.9	4601.2	4335.6	3984.2	3944.4	4505.9	4227.7	4298.2	4430.6
CAFS_HM_T_00043112	11073.2	10716.5	10854.1	11300.9	10396.9	10795.5	11158.1	10485.5	11011.2
CAFS_HM_T_00044195	5660.4	5557.8	6001.1	5610.4	5491	5403	5735	5051.9	5570.3
CAFS_HM_T_00075602	9294.2	9873.8	8509.3	9869.5	9957.3	9520.7	9744.3	9862.7	10123.6
CAFS_HM_T_00008033	513.5	488.8	529.1	515.7	510.1	509.7	545.7	551	525.5
CAFS_HM_T_00058936	14125.2	13506.8	15027.9	13362.1	14312.4	15238.8	13650.2	13841.6	15051.6
CAFS_HM_T_00005387	5968	6923.2	5116.3	6695.9	7734.8	6584.9	7058.6	7001	7550.5
CAFS_HM_T_00063958	248.4	226	231.8	230.9	230.8	446.6	270.9	257.6	244.4
CAFS_HM_T_00078997	12709.3	13206.8	13788.3	12137.6	12914.8	12013.3	13194.3	12546.9	12239.2
CAFS_HM_T_00071290	7402.4	7545.9	7297.5	6892.6	7161	7581.1	7136.2	7552	7197.4
CAFS_HM_T_00051134	6150.4	6381.1	5908	6151.1	6259.4	6114.6	5961.1	6470	6573.4
CAFS_HM_T_00044925	6374.5	6514.7	6338.9	6482.5	6589.4	6536.7	6144	6733.7	6452.1
CAFS_HM_T_00088295	1695.4	2186.6	1890.8	2386.1	2258.7	2022	1942.8	2008.2	1788.7
CAFS_HM_T_00043005	7491.7	7850.7	7356.4	7615.5	7792.9	7931.3	7642.5	7768	8199
CAFS_HM_T_00019920	6984.4	6152.4	7258.1	6877.7	7155.6	6195.9	6914.8	6790.4	6659.5
CAFS_HM_T_00069365	10769.8	10422.7	10924.2	10737.5	11168.4	10321.5	10409.1	11257.1	10681.2
CAFS_HM_T_00051077	14939.1	15470.8	15710.4	16082.4	14518.2	15800.8	14745	14188.7	14686.3
CAFS_HM_T_00078356	8665.9	8595.3	8099.2	8410	8648.5	7926.7	8158.6	8307.6	8396.7
CAFS_HM_T_00018366	9711.2	10412.2	9943.2	9582.1	9631	9826.1	10106.8	9480.4	10118.5
CAFS_HM_T_00017743	9103.2	9088.3	8512.4	7706.6	7705.4	8881.3	8981.4	7136.5	8295.5
CAFS_HM_T_00020610	3935.1	4097.9	3903.9	4021.8	4221.8	3973.9	3945.8	4185	4099.3
CAFS_HM_T_00031328	8292.5	8330.6	8730.1	8211.4	8017.1	8476.8	8057.7	8266.3	8178.1
CAFS_HM_T_00040130	14688	15452	15441.9	14750.9	13628.9	16306.6	15028.3	14045.8	14645.2
CAFS_HM_T_00087268	7196.4	7037.4	7298.7	7715.6	7640.5	7114.9	6966.5	7354.7	7599.6
CAFS_HM_T_00056880	8624.1	8753.3	9572.6	8812.7	9156	8607	8863.7	8997.4	8859.1
CAFS_HM_T_00048208	8160.1	8526.7	8699.6	7911.2	8151.5	8926.2	8882.1	8153.1	8233.3
CAFS_HM_T_00069909	3070.5	3825.2	2722.9	3789.6	4216.5	3551.8	3750.9	3103.1	3479.3
CAFS_HM_T_00016137	2966	2870.1	2889.9	2956.3	2863.3	2968.9	2918.4	3021.3	3082.5
CAFS_HM_T_00070051	9731.6	9811.1	9790.9	9745.3	9746.1	9496.6	9452.8	9713.1	9805.1
CAFS_HM_T_00026989	10176.2	9814.9	10635.9	10109.6	10369.6	9594.2	10387.7	10203.5	10609.4
CAFS_HM_T_00043160	7445	7283.2	8016.4	7532.1	7095.7	7217.6	7583.4	7284.5	7295.3
CAFS_HM_T_00008957	11126.7	10022.6	12199.4	11563.3	10912.6	10782	10716.3	11771	11237.3
CAFS_HM_T_00040194	10078.9	12318.2	9436.2	7787.3	7917.5	12253.3	11142.9	6859	9338.5
CAFS_HM_T_00023239	11060.1	11521.1	11425.7	11106.1	10785.8	11647.8	11727	10288.6	10655.8
CAFS_HM_T_00008334	9202	9080	9185.7	8583.2	8876.6	9091.9	9344.3	8510	8539.2
CAFS_HM_T_00040139	6017	6201.1	5991.2	6011.6	6028.4	6279.6	6208.1	5754.8	6158.7
CAFS_HM_T_00054471	4119.9	4512	4433	4343.6	4368.3	4268.2	4423.2	4049.3	4234.7
CAFS_HM_T_00018993	7666.3	7593.3	7355.3	7473.5	7353.9	7151.5	7433	7384.6	7463.5
CAFS_HM_T_00037464	13133.4	13055.4	12892.7	13630.5	15227.7	16881.2	14178.7	14819.5	16771.8
CAFS_HM_T_00019121	12452.9	13312.9	12743.8	12309.7	12447.4	13065.5	12961.9	11818.6	12259.4
CAFS_HM_T_00046525	8626.7	8680.5	8154.6	8520.6	8257.8	8224.7	8718.3	8218.7	7995.4
CAFS_HM_T_00022789	615.7	626	589.8	648.2	672.1	1579.3	653.5	698	646.9
CAFS_HM_T_00041509	6646.5	6317.1	6466	6570.2	6681.4	6409.6	6644.5	6734.2	6909.2
CAFS_HM_T_00061073	8150.4	7918.3	7980.9	8090.4	8069.2	7933.4	8122.9	8077.8	8192.2
CAFS_HM_T_00088449	10477.8	10915.8	10440.1	10593.7	10253.8	10343.1	10344.8	10413.6	10245.6
CAFS_HM_T_00090971	9405.7	9360.1	9446.9	9221	9523.8	8940.8	9484.4	9199.2	8943.3
CAFS_HM_T_00047991	4706.5	4474.9	4636.6	4676.9	4568	4560.6	4520.5	4662.7	4726.4
CAFS_HM_T_00054411	10148.5	10377.7	10015	10001.3	9965.5	9629.2	9762.2	10471	10124.5
CAFS_HM_T_00068438	5269.3	5480.2	5355.5	5430.2	5402.2	5271.1	5402.3	5060.1	5123.3
CAFS_HM_T_00024966	5894.8	5658.4	6174.5	6191.1	6747.2	5912.6	6308.6	6536.6	6286.5
CAFS_HM_T_00049415	2314.3	2864.3	2815.3	3059	3321.2	2583.5	2660.5	3271.4	2948.3
CAFS_HM_T_00071979	1925.2	2456.8	2089.8	2788.3	2447.3	2360.5	2698.1	2834.5	2905.3
CAFS_HM_T_00030402	7676.8	7761.7	8158	7954.6	7665.1	8028.3	7987.8	7672.6	8002.4
CAFS_HM_T_00086550	3215.3	3129.5	3361.3	3315.5	3260.3	3284.9	3315.9	3292.6	3166.6
CAFS_HM_T_00051644	1308.9	1385.8	1310.8	1233.6	1378.1	2446.1	1383.8	1518.7	1433.1
CAFS_HM_T_00017958	7604	7500.2	7194.9	6805.2	7039.7	6974.5	7369.3	6505.6	6874.6
CAFS_HM_T_00017092	5764.2	5914.9	5653.2	5781	5761.3	5556.1	5701.3	5557.2	5708.4
CAFS_HM_T_00039858	1864.6	2233.1	2050.1	2085.5	2030.8	2265.4	1874.4	2099.6	1978.3
CAFS_HM_T_00068065	7343.7	7459.3	7257.2	7015.6	7182.7	7715	7631.5	7344.1	7603.2
CAFS_HM_T_00064188	8888.5	8393.1	9034.9	8879.4	9103.9	8670.9	8650.3	9199.9	8861.9
CAFS_HM_T_00062493	9291.3	8856.6	8799	8925.5	8975	8676.5	8723.2	8836.8	8857.7
CAFS_HM_T_00060269	11507.3	9614.1	10553	10806.1	12560.1	10389	11522.4	11014.6	10559.6
CAFS_HM_T_00031519	6044.8	5903.7	6163.8	6124.5	6522.7	5990.1	6108	6404.7	6383.4
CAFS_HM_T_00058446	8046.5	8029.4	8112	7968.8	8033.4	7972.9	8199.2	8148.7	8158
CAFS_HM_T_00025415	11029.2	10792.1	10911.4	10727.3	10819.6	10819.3	10393.1	11535.3	11173
CAFS_HM_T_00081146	11485.1	11377.3	11114	10578.8	10568.6	11245.9	10878.4	10726.5	10773
CAFS_HM_T_00075861	9226.2	8819.1	9068.2	9057.4	9465.4	8758.7	8866.7	9173.3	9135.4
CAFS_HM_T_00073215	562.8	521.2	577.8	545.2	542.6	557.8	626.3	509.7	528.1
CAFS_HM_T_00005452	7385.2	7459.6	7688.3	7274.7	7348.9	7117.5	7202	7615.5	7319.9
CAFS_HM_T_00001942	16231.9	16038.8	15516.1	16044.8	16487.4	15103	16237	15268.7	15646.8
CAFS_HM_T_00046103	7404.1	7751.7	7639	7745.4	7534.6	7810.1	7955.7	7459.6	7610.1
CAFS_HM_T_00004827	11525.3	11741.4	11496.6	10837.3	11039.8	11320.1	11634.8	10613	11197.5
CAFS_HM_T_00058541	8884	7571	9556.1	8879.3	8418.8	7982.9	8272.2	8369.1	8425.3
CAFS_HM_T_00068473	11673.3	12567.5	11352	10990.3	10491	11581.5	11839.3	9528.5	10768.4
CAFS_HM_T_00090285	7305.6	7860	7227.5	6780.9	6798.4	7349	7468.7	6590.5	7244.8
CAFS_HM_T_00033005	4751.3	5191.7	4524	4738.2	4828.3	4664.3	4646.3	4380.1	4911
CAFS_HM_T_00070004	12647.1	12361.1	13009.6	12320.1	12039.9	12799.3	12723.3	11983.7	12463.7
CAFS_HM_T_00051204	7935.5	7853.7	7845.8	8403	8451.2	7752.3	7871.2	8357.8	8147.9
CAFS_HM_T_00014583	36713.8	43567	38316.5	47662.9	42930.8	41091.4	68180.8	36583.8	39126.5
CAFS_HM_T_00082983	10367.4	10087.2	10332.3	10390	10369.2	9865.3	9971.5	10293	10345.1
CAFS_HM_T_00041710	2246.1	2411.7	2210.2	2238.5	2268.8	2213.4	2242.7	2345.8	2229
CAFS_HM_T_00005877	9279.5	9111.7	9962.1	8776.2	7770.3	9152.8	8639.6	9078.5	8580.1
CAFS_HM_T_00020216	6638.6	6188.5	6601.8	6701.5	6696	6349.7	6337	6609.6	6565.2
CAFS_HM_T_00084406	7249.6	7422.1	7618.4	7399.8	7346.6	7269.2	7328.1	7614.5	7405.1
CAFS_HM_T_00073708	6520.2	9765.2	6268.3	8454.9	9668.6	7464.8	8044.2	6904.5	7552.6
CAFS_HM_T_00035874	7481.6	6946.5	7947.2	7610.7	7763.5	7680.3	7762.7	8010.8	7799.5
CAFS_HM_T_00062527	7996.2	7221.7	8200	7894.7	7900.4	7578.4	7767.2	8063.1	7986.2
CAFS_HM_T_00017684	8744.3	8008.5	8590.1	8592.5	9055.1	8081	8497.3	8658.3	8536.6
CAFS_HM_T_00030291	13852.4	14965.7	14013.9	12990.9	13195.1	15524.5	14150.4	13171	13877.1
CAFS_HM_T_00037368	14735.4	15323.3	15663.9	15305.7	15039.2	15850	15709.3	15617.6	15435.4
CAFS_HM_T_00023031	9424.7	9095.1	9304.4	9414.4	9598.7	9126.3	9127.4	9918.7	9628.1
CAFS_HM_T_00091403	27963.8	30038.7	29031.4	29028.9	26263.6	30382.3	29926.4	27058.1	27071.5
CAFS_HM_T_00012722	10710.4	9663.8	11481.7	11048.5	10598.1	10278.4	10145.7	11342.1	10661.9
CAFS_HM_T_00077112	8824.1	9393.6	8159.3	6939.1	7194	9698.1	9483.3	6600	8316.2
CAFS_HM_T_00027074	7173.8	7023.9	7265.2	7168.7	7247.2	7404.6	6866.2	7242.6	7319.2
CAFS_HM_T_00086964	7487.2	7273.8	7353.2	7032.1	6485.7	6985.2	7237.4	6794.4	7320
CAFS_HM_T_00003217	2944.5	3037.2	2818.4	2870.6	2837.3	2759.4	2976.1	2712.2	2866
CAFS_HM_T_00060176	1910.3	1815.5	1956.5	1903.4	1969	1792.2	1841.9	1873.7	1847
CAFS_HM_T_00060246	10989.3	11070.1	12385.7	10391.2	10447.5	11321.2	11838.4	10343.4	10636.4
CAFS_HM_T_00087431	1013.7	1053.8	1022.7	968.4	1047.1	1109.5	1013.2	1022.6	965.2
CAFS_HM_T_00076524	337.6	314	300.9	316.9	328.4	302.3	306.9	325	334.6
CAFS_HM_T_00005819	4771.8	4559.1	4751.3	4343.7	4326.3	4778.7	4695.4	4301.9	4056.8
CAFS_HM_T_00039442	2995.2	3089.9	3221.9	3127.5	3023.8	3091.1	3194.1	3327.3	3714.7
CAFS_HM_T_00089108	7451.9	7457.8	7166.6	7318.3	7228.2	7193.2	7141.5	7409.1	7438.3
CAFS_HM_T_00029945	7229.8	6600.3	7759.2	7361.1	7189.2	6876.7	6910.9	7445.1	7097.8
CAFS_HM_T_00052702	6163.1	6329.3	6447.4	6163.5	5780.5	6145	6007.5	6006.2	5868.3
CAFS_HM_T_00031810	5221.8	5116.1	5443.8	4925.9	4809.5	4998.7	5035.2	4503.7	5311
CAFS_HM_T_00054153	10177.9	12115.6	9300.2	9531.8	7840.4	11896.2	10644.3	7319.1	10490.3
CAFS_HM_T_00054669	8194.1	8069.4	8705.6	8879.8	9081.2	7562.5	8489.3	7979.2	8216.1
CAFS_HM_T_00026406	7260.8	7042.5	7353	7153.9	7147.4	6955.4	7126.9	7296.6	7448.2
CAFS_HM_T_00026326	5629.7	5477.3	5688.7	5599	5790.9	5732.5	5454.6	5446.6	5425.3
CAFS_HM_T_00051701	11302	11111.3	11360.3	10411.2	10823.6	10990.5	11762.2	10151.7	11152.2
CAFS_HM_T_00047396	7914.4	7716.8	7872.4	7738.6	8200.9	7628	7713.8	7745.2	7839.8
CAFS_HM_T_00004557	1104	1096.6	1030.1	1059.7	1089.8	1120.6	1029.7	1221.1	1115.9
CAFS_HM_T_00056703	9990.9	9787.9	10053.1	9544.5	9123.5	9223.5	9804.8	9318.9	9455.2
CAFS_HM_T_00053449	9655.3	9672.4	8861.2	8913.8	9111.8	8484.7	8612.2	8667.8	8393.1
CAFS_HM_T_00088163	9754	9495.2	9618.9	9655.2	9386.7	9215.7	9369.2	9564.2	9760
CAFS_HM_T_00013630	5520.6	5159.8	5749	5536.4	5579.2	5236	5378.5	5755	5665.6
CAFS_HM_T_00073577	6751.6	6831.6	6558.9	6633.5	6717.5	6469.3	6573.5	6449.4	6703.3
CAFS_HM_T_00073195	9388.5	7920.7	7754.5	8709.3	9723.5	8499.8	9004.2	9771.1	9919.6
CAFS_HM_T_00092258	7856.3	7900.3	7712.6	7650.7	7733.4	7634.1	7950.3	7359.9	7682.2
CAFS_HM_T_00014742	6667.1	6753.5	6849.4	6799.5	7218	6939.2	6928.3	6601.8	6594.9
CAFS_HM_T_00076966	6800.4	6607.7	6390.8	6104.2	7212.2	6312.5	6829.1	6494	6719.9
CAFS_HM_T_00037605	8902	8518.9	9058.1	9162	9136.1	8421.4	8558.8	9215.2	9050.1
CAFS_HM_T_00003170	2108.4	2040.9	2142.5	2252.1	2449.1	2052.2	2168.5	2338.3	2104.2
CAFS_HM_T_00036929	11837.1	11882.7	12952.6	12345.9	12168.1	12425.5	12433.1	13202.8	12809.3
CAFS_HM_T_00073822	5522.6	5247	5539.1	5345.1	5295.6	5021.1	5275.8	5260.2	5209.7
CAFS_HM_T_00055326	6311.5	6533.6	5898.9	6105.4	6065.1	5972.5	6219.9	5650.6	5809.2
CAFS_HM_T_00050564	6631.5	6741.3	6662.3	6635.6	6985.2	7297.4	7100	7224.1	7287.7
CAFS_HM_T_00019858	692.1	694	725.5	758.4	727.6	702.9	738.8	704.9	718.8
CAFS_HM_T_00030286	6533.4	6981.9	6977.5	6526.8	6713.9	7006.9	7224	6575.1	6664.1
CAFS_HM_T_00043694	6296.4	6237.7	6301.5	6396.8	6279.3	5745.8	6145.2	6137.5	6056.1
CAFS_HM_T_00062807	6085.1	6680.6	6417.1	6679.3	6559.7	6115.1	6326	6410	6429.4
CAFS_HM_T_00029609	4977.3	4698.3	5249.2	5008.9	4993.3	4806.8	4745.6	5227.7	5124.2
CAFS_HM_T_00042409	2059.6	2222.3	2020.8	2298.8	2056.9	2174.9	2122.9	1967.8	1963.6
CAFS_HM_T_00071620	6687.8	6916.9	6720.4	6782.1	6905.3	6820.9	6531.8	7012.8	6976.3
CAFS_HM_T_00082092	3675.6	3370.9	3660.9	3601	3598.9	3518.5	3518.1	3529.2	3524.5
CAFS_HM_T_00026976	4457.5	4791.7	4380.9	4676	4769.8	4748.5	4865.9	4773.7	4785.8
CAFS_HM_T_00065611	627.8	555	622.2	698.7	661.5	552.1	608.5	711.6	625
CAFS_HM_T_00016955	12471.7	12381.5	13528.3	12463.1	12535.9	13388.5	12545.3	13676.4	12991.5
CAFS_HM_T_00049606	6452.8	6623.8	6441.6	6359.5	6333.3	6333.4	6313.1	6427.6	6466.4
CAFS_HM_T_00051723	11245.2	10649.5	11045.6	9855.1	10176.2	11357.1	11270	10247	9753.5
CAFS_HM_T_00007790	6223.9	5438.5	6990.9	5933.8	5071.6	5049.1	5565	4898.4	5746
CAFS_HM_T_00084019	151.5	154.8	152.6	152	155.2	135.8	158.1	130.3	149.7
CAFS_HM_T_00061583	4763.2	5169.7	4699.3	5572	4905.9	4818.8	4826	4767.1	4688.4
CAFS_HM_T_00061958	7802.9	8349.8	7527.2	8546.9	7468.9	7533.5	7424.4	7004.1	8129.4
CAFS_HM_T_00036165	8546.6	7610.6	8412.5	8135.5	7572.5	7844.5	7898.7	7532.1	7893.9
CAFS_HM_T_00075145	10302.4	10363.3	9870.5	10262.8	10427	10053.3	10645.6	10285.4	10013.5
CAFS_HM_T_00082999	6419.1	7176.1	6997.6	6463.2	6755.2	6679.8	7006.5	6572.8	6465.1
CAFS_HM_T_00068229	5293.7	5545.7	5247.8	5570.3	6287.7	5471.6	5397.8	6278.8	5727.2
CAFS_HM_T_00063080	5914.5	5555.1	5822.7	5669.6	5640.4	5476.1	5650.3	5868.4	5673.1
CAFS_HM_T_00092107	4263.1	4179.2	4098.9	4196.6	4380.3	3994.8	4019	4418.7	4091.8
CAFS_HM_T_00046568	755.8	816.7	1282.9	800.7	750.9	1163.9	1215.6	800.1	919
CAFS_HM_T_00041962	9486.2	10269.3	9011.3	8168.5	8358.3	9952.9	10124.2	7921.1	9458.9
CAFS_HM_T_00084412	9966.8	9827.4	10356.2	9624.9	9879.8	10039	10434.8	9704.4	9907.2
CAFS_HM_T_00025420	6827.6	6649.7	6801.4	6785.5	6606.1	6375.5	6582.6	6622.1	6651.7
CAFS_HM_T_00076336	5728.3	5826.7	5442.8	5697.8	6165.9	5327.3	5191.1	6553.3	5581.8
CAFS_HM_T_00004692	4514.1	4221.8	4293.4	4537.1	4737.7	4344.6	4338.5	4732.9	4424
CAFS_HM_T_00038250	5174.8	4787.5	5413.3	5256.2	5079.7	4875.4	4921.6	5277.7	4943.2
CAFS_HM_T_00009918	8831.7	9215.7	8737.9	8445	8438.9	9208.4	9347.2	7834.6	8482.8
CAFS_HM_T_00025324	7036.8	6922.3	6918.2	6961.1	7251.6	7110.3	6871.9	7145.3	6955.9
CAFS_HM_T_00076176	167.4	179.1	154.7	168.3	162.5	126.9	169.5	139.9	162.7
CAFS_HM_T_00089448	3735.5	3706.4	3382	3468.5	3655.1	3513.3	3549.9	3768.9	3187.4
CAFS_HM_T_00046608	1698.2	1506.9	1775.8	1855.8	1624.4	1461.7	1457	1793.3	1623.5
CAFS_HM_T_00063618	9359.5	9399.9	9808.5	9720.1	9454.2	9790.5	9306.8	10033.6	9573.9
CAFS_HM_T_00047131	9234.2	8729	9722.7	9181.2	9203.3	8753.7	9091.7	8938.5	8987
CAFS_HM_T_00089476	5711.2	5525.7	5110	6067.8	5964.2	5557.8	5922.5	5802.8	5731.3
CAFS_HM_T_00000528	5737.9	5879.2	5584	5473.3	5797.6	5469.4	5808.4	5846.1	5911.3
CAFS_HM_T_00054371	4785.4	4807.5	5175.4	5306	5636.9	5339.3	5454.3	5425.4	5381.2
CAFS_HM_T_00048160	5559.2	5495.9	5141.8	5402.4	5514.2	5650.7	5560.3	5532.3	5778.3
CAFS_HM_T_00003676	6279.8	5235.5	6541.3	6310.3	5951.7	5772.5	5764.9	6578.4	6234.5
CAFS_HM_T_00016920	4764.2	4692	4761.1	4758.9	4553	4728.8	4865.2	4512.5	4766.3
CAFS_HM_T_00013840	6376.7	6003.4	6576.5	6545.6	6404.4	6309.9	6057.2	6734.7	6415.3
CAFS_HM_T_00081013	8496.6	7751.8	8711.9	8705.2	8349.4	8167.6	7788.4	8986.4	8413.7
CAFS_HM_T_00078662	4344.3	2755.2	3139.5	2889.5	2919.6	2939.8	4222.6	3007.1	4042.8
CAFS_HM_T_00030719	78	75.2	84.5	86.3	78.9	70.7	80.8	79	72.8
CAFS_HM_T_00057687	7599.4	7760.8	7591.6	7541	7840.8	7403.6	7635.7	7583	7619.4
CAFS_HM_T_00031224	6308.6	6137	6274.1	6412.8	6266.6	6263.8	6185.1	6270.8	6255.1
CAFS_HM_T_00077687	9853.5	10731.8	10010.2	9603.6	9591.3	9335.7	11660.9	9606.6	9295.6
CAFS_HM_T_00034703	6712.8	6539.7	6728.6	6381.3	6414.2	6745.1	6482.5	6451.9	6420.6
CAFS_HM_T_00059356	4306.4	4071.1	4185	4004	3822.3	4167.6	3918.4	4269.5	4524.1
CAFS_HM_T_00075365	12337.7	12661.3	11740.4	12169.6	12433.3	12357.7	12900.1	13495.5	13162.3
CAFS_HM_T_00040628	6423.9	6576.6	6235.1	6511.1	6556.7	6235	6121.5	6512.1	6529.5
CAFS_HM_T_00075768	4643.1	4298	4681.6	4482	4274.4	4428.8	4624.3	4091.2	4164.8
CAFS_HM_T_00030642	7858.8	8153.9	7581.8	7927.3	7886.6	7885.4	7908.9	7661.4	8130.7
CAFS_HM_T_00009913	3234.7	3610.6	3528.1	3249.8	3241.7	3295.4	3687.6	3201.8	3017.5
CAFS_HM_T_00074457	2558.4	2620.2	2570.8	2547	2577.7	2555.8	2590.7	2507	2556.7
CAFS_HM_T_00040703	4944.9	4602.8	4390.3	4595.5	4885.2	4250.7	4912.3	4144.2	4471.3
CAFS_HM_T_00067108	7545.5	7903.5	7270.5	7322.1	7831.4	7601.3	7652.4	7627.6	7627.3
CAFS_HM_T_00023363	5759	5483.2	5822.8	5675.8	5591.8	5636.6	5460.2	5399.7	5401.5
CAFS_HM_T_00043643	4358	4461.9	4357.3	4191.3	4106.9	4604.9	4502	3965.8	4215.8
CAFS_HM_T_00066779	3144.8	3192.9	2985.6	3120.8	3146.1	3041.9	3428.5	2945.9	3049.4
CAFS_HM_T_00045944	2888.2	2993.8	3164	3094.8	2953.6	3117	2864.5	3130.7	2965.3
CAFS_HM_T_00031096	7881.2	8084.4	7979.4	8650.2	8443.6	8404	8292.5	8503.7	8292.6
CAFS_HM_T_00050362	5758.4	6199.1	5592	5341	5612.4	5987.3	5743.8	5238.7	5861.5
CAFS_HM_T_00092469	5181.2	5163.4	5497.9	5709.6	6044.5	5296.6	5386.5	6007.3	6056.7
CAFS_HM_T_00029674	4042.7	4200.4	4113.4	4171.6	4301.5	4015.5	4281.2	4244.4	4168.4
CAFS_HM_T_00052684	7483.5	7888	7917.4	7510.6	7666.9	7867.9	7954.6	7782.5	7525.6
CAFS_HM_T_00015634	7279.7	7485.7	7027.2	7034.5	6350.3	7581.3	7408.9	7420.7	7593.6
CAFS_HM_T_00091656	4995.4	5142.5	5063.5	4700.8	4772.8	4946.7	4851	4677.1	4919.7
CAFS_HM_T_00032050	7746.1	8154.4	8389.8	7630.4	7096.4	7898.5	7549.1	7832.6	7906.2
CAFS_HM_T_00040325	7793.5	7579.3	7645.4	7498.7	7488	7309.3	7637	7158.8	7391.6
CAFS_HM_T_00069136	8579	8738.2	8491.5	8595.5	8293.9	8018.6	8414.3	8425.5	8415.5
CAFS_HM_T_00055287	5490.7	5411.3	5079.1	5327.3	5385.4	5207.3	5286.4	5364.9	5375.7
CAFS_HM_T_00085019	9989.8	9458.2	10815	12128.5	12000.7	10594.3	10992.4	10937.9	10458.4
CAFS_HM_T_00038479	9507.2	11241.7	9444.4	8141.7	7976.7	11473.6	10819	7869.1	10214.8
CAFS_HM_T_00073474	4124.6	4030	4355.2	4297.8	4075.2	4241.6	4067.2	4298.7	4317
CAFS_HM_T_00006740	8572.9	8495.8	8339.2	8226.5	8198.9	7813.6	8267.4	7456.2	7953.3
CAFS_HM_T_00028713	6088.1	6461.8	6619	6254.4	6399.8	6671.8	6943.6	6004.1	6552.1
CAFS_HM_T_00065410	1591	1586.8	1620.7	1625.7	1661.1	1703.2	1604.7	1686.3	1618.1
CAFS_HM_T_00028007	11894.6	11705.3	11209.2	11047	10498	10791.3	10415	12568.5	8948
CAFS_HM_T_00040502	3734.9	3760.1	3642.8	3645.9	3495.1	3545.3	3272.5	3867	3665.8
CAFS_HM_T_00027638	4192.5	4088.3	4185.7	4433.5	4693.2	4192.1	4132.3	4817.7	4469.1
CAFS_HM_T_00013870	5515.4	5246.8	5751.7	5611.3	5737.3	5240.1	5902.4	5763.9	5895
CAFS_HM_T_00079170	4840.3	5469.5	4586	4478.2	4673.6	5244.5	5073.3	4551.4	4837.4
CAFS_HM_T_00024454	10969.2	10105.7	11876.1	10173.4	10369.7	10962	10880.3	9901.9	9948
CAFS_HM_T_00032941	1760.4	1719.8	1641.6	1771.4	1983.3	1601	1849.3	1747.3	1656.7
CAFS_HM_T_00045362	5411.5	5455	5183.3	5430.8	5171.7	6031.9	5564.2	5238.5	5588.2
CAFS_HM_T_00004550	6362.9	6034.3	6336.8	6235.9	6359.9	6205.6	6153.8	6410	6282.4
CAFS_HM_T_00048587	7068.1	6734	6981.9	6848.2	7182.6	6898.7	7453.6	6347.6	6626.8
CAFS_HM_T_00065427	5237	5207.8	5301.8	5128.9	5061.2	5167.1	5264.1	4899.4	4977.7
CAFS_HM_T_00009409	9434.7	9302.7	9891.5	9241.4	9556	9206.1	9484.6	9324.7	9308.8
CAFS_HM_T_00050183	6369.6	6488.4	6588	6179.2	6147.9	6222.1	6448.9	6124.1	6377.8
CAFS_HM_T_00033386	5334.5	4913.1	5183.3	4563.5	5098.8	4705	4704.8	4818.2	4497.1
CAFS_HM_T_00062164	4581.9	4560.9	4485	4373.3	4376.8	4705.4	4783.9	4422.4	4523.7
CAFS_HM_T_00008768	6420.5	5772.1	6449.4	6490.1	6457.3	5949.7	6033.1	6655.2	6192.9
CAFS_HM_T_00006841	5893.8	6305.4	5979.7	6190.9	6756.5	6176.7	6050.2	6877.6	6224.4
CAFS_HM_T_00082455	4652.7	4680.9	4613.7	4597.6	4607	4635.6	4724.1	4711.2	4817.7
CAFS_HM_T_00023283	6862.2	7116.6	7292.8	7226.9	6921	6801.6	7042.2	6666.8	6605.2
CAFS_HM_T_00040530	8793.8	8833.3	9124.4	8529.1	8464.4	9177	9401.7	8443.4	8819.6
CAFS_HM_T_00003584	8587.9	8012.8	9558.8	8563.3	8513.7	9202.9	8201.1	9523.5	8653.6
CAFS_HM_T_00035633	3241.9	3253.2	3274.1	3349.9	3425.9	3173.4	3210.3	3487.4	3277.2
CAFS_HM_T_00048841	5627.3	5780.5	5803.8	5615.5	5605.5	5639.6	5674.4	5877	5620.8
CAFS_HM_T_00051706	7338.5	7206.2	7358.9	6782.6	7050.5	7176.2	7646.9	6914	7305.3
CAFS_HM_T_00013254	3362	3534.4	3446.6	3649.1	3772.1	3515.3	3544	3640.1	3467
CAFS_HM_T_00048411	7556.5	7584	6977.5	7669.9	7712.5	7494.2	7178.5	7525.7	7244.6
CAFS_HM_T_00064381	4870.8	4876.1	4907.4	4754.8	4727.7	4540.6	4835.4	4916.4	4730.6
CAFS_HM_T_00054805	8384.4	6902	9135.1	8526.3	8010.1	8096.3	8030.6	9218	8246
CAFS_HM_T_00070772	5756	5762	5719.2	5864.2	5896	5656.6	5698.2	5821.8	5824.8
CAFS_HM_T_00047028	6519.5	6602.7	6666.6	6674.3	6631.2	6681.7	6431.2	6891.6	6670.5
CAFS_HM_T_00085450	5359.4	5196.1	5492.4	5302.3	5446.7	5373	5388.5	5330.9	5303.6
CAFS_HM_T_00017823	5834.1	5877.1	5999.4	5979.5	6330.1	6206.9	5954	6419.3	6184.1
CAFS_HM_T_00066061	7467.3	7535.2	7638.6	7617.4	7729.7	7169.8	7847.2	7324.5	7707.5
CAFS_HM_T_00076582	4599.3	4290.1	4714.5	4446.1	4469.1	4128.7	4368.5	4654.1	4671.2
CAFS_HM_T_00062089	6269.9	7850	6602.4	6360	5644.1	7602.5	6363.4	5811.7	6707.3
CAFS_HM_T_00051346	8458.7	8535.3	8464.2	8536.1	7914.5	8027.1	8040	8383.5	7983.1
CAFS_HM_T_00071356	12164.1	13754	11853.8	11099.8	10432.5	12802.9	12359.3	10566.5	11252.4
CAFS_HM_T_00039323	6980.7	6908.5	6772.8	6781.1	7134.6	6873.8	7079.6	6846.8	6952.5
CAFS_HM_T_00076467	5954.2	6327.3	7248.5	5426.5	5845.1	6851.5	6171.7	5921.2	6104.7
CAFS_HM_T_00006719	12686.6	11073	12228.7	14354.6	15051.4	13321	12213.9	11632.8	10771.4
CAFS_HM_T_00078136	6159.5	6294.2	6313.2	6504.3	6693.8	6725.4	6599.9	6502.5	7035.8
CAFS_HM_T_00006701	6163.9	8024.4	5882.1	7281.6	8080.4	7918.9	8324.4	7730.1	6197.1
CAFS_HM_T_00090227	5089.9	4916.1	5039.8	4812.4	4765.9	4970.8	5168.5	4699.6	5135.8
CAFS_HM_T_00064354	13500.4	13416.6	13377.1	12761.9	12823.8	12772.8	12724.7	12482.6	12788.7
CAFS_HM_T_00065550	5583.6	5172.3	5770.9	5685.7	5602	5524.5	5715.8	5234.1	5327.4
CAFS_HM_T_00066011	10807.6	10765.4	10862.8	10376.3	10455.2	10505.6	10655.4	10337.1	10797.9
CAFS_HM_T_00024547	6458.5	6269.8	6262.2	5871.1	5776.6	6429.6	6360.3	6282.5	6182.3
CAFS_HM_T_00034007	7731.2	7968	7859.8	7502.7	7471	7440.6	7701.9	6980.3	7399.4
CAFS_HM_T_00083490	6718.9	7853.8	7629.8	7936.2	8008.6	7134.5	7025.5	7457.7	7322.9
CAFS_HM_T_00008821	5206.4	5268	4927.5	5005.7	5235.8	4856.4	4984.5	4798.6	5250.2
CAFS_HM_T_00054211	6253.7	6296.9	6136.7	6259.8	6277.4	6298.2	6030.4	6144.1	6326.1
CAFS_HM_T_00022906	1093.2	1272.4	1307.1	1157.8	1202.3	1322.9	1268.3	1109.8	1156.3
CAFS_HM_T_00015036	5730	5875.2	5632.5	5783.2	6256.9	6050.2	5956	6340.5	6214.6
CAFS_HM_T_00001863	3812.2	4078.2	3214	3915.5	4989.4	3284.2	3144.3	4352.4	3675.5
CAFS_HM_T_00022076	7495.6	7131.2	7094.7	7444.2	7556.3	7007.6	6999.9	7420.7	7054.8
CAFS_HM_T_00088739	22107.3	18658.7	25747	25674.3	19738.7	21794.5	23333.6	23829.7	21295.6
CAFS_HM_T_00016847	5468.2	5741.1	5304.5	5652.8	5942.3	5418.3	5694.7	5977.1	5788.3
CAFS_HM_T_00039900	7249	6847	7277.3	7018.4	6857.1	7035	7064.1	7424.5	7232.1
CAFS_HM_T_00026362	8320.6	8423.3	8367.8	8351.8	8413.5	8117.1	8296	8643	8278.6
CAFS_HM_T_00074112	4222	4184.4	4016.2	3920.9	4019.9	3940.8	3804.3	4146.5	4165.6
CAFS_HM_T_00064328	3518.6	3586.4	3577.3	3603.2	3585	3613.3	3695.4	3645.8	3292.2
CAFS_HM_T_00020008	4708.8	4740.2	4684.3	4556.3	4772.4	4613.2	4655.3	4839.9	4637.3
CAFS_HM_T_00033691	3552.9	3624.4	3626.9	3489.6	3513.5	3507.7	3573.7	3399.7	3458.9
CAFS_HM_T_00064025	4125	4013.1	4313.1	4087.6	4147.1	3994.1	4242.6	4063.9	4044.9
CAFS_HM_T_00083277	8439.8	7635.6	9936.8	8466.9	7570	7655.3	7560.6	8992.9	7713.3
CAFS_HM_T_00017438	2460.8	2300.5	2327.3	2328.7	2372.8	2349.9	2322.1	2317.6	2370.6
CAFS_HM_T_00042759	4959.9	4992.4	5179.2	5181.3	5139.7	5817.3	5087.8	5171.4	5108.2
CAFS_HM_T_00080171	6762.6	6235.3	6356.5	5897.6	4937.3	7081.8	5813.3	6491.1	7030.3
CAFS_HM_T_00071018	6703	8979.9	6101.4	8354.2	7697.8	7078.1	7009.7	6615.6	6866.2
CAFS_HM_T_00026966	1850	1788.6	1839.8	1788.2	1737.7	1782.1	1827.8	1793.3	1837.9
CAFS_HM_T_00062314	6018.6	6375.1	5558.3	5187	4949.2	5807.9	5684.5	5086.8	5734.8
CAFS_HM_T_00071862	10660.9	10047	11647.7	10571.6	10596.7	10420.2	10558.4	10448.8	10018.7
CAFS_HM_T_00060545	4954.3	5583.5	5289.5	5935.9	6393.6	5566.4	5358.5	6981.5	6066.8
CAFS_HM_T_00018749	4420.4	4527.4	4280.8	4600.6	4775.9	4403.8	4586.8	4432.6	4455.4
CAFS_HM_T_00057696	8840.5	9525	8573.9	9096.1	9081.4	8989	9244.2	8763.7	8638.1
CAFS_HM_T_00016898	7948.2	8465.6	8394.4	8588.5	8336.6	8461	8617.1	7874.4	8176.8
CAFS_HM_T_00076832	5737.6	5999.5	5730.3	5815.2	5735.8	5627.8	5684.1	5746	5870.3
CAFS_HM_T_00085793	4379.6	4366.8	4440.4	3947.7	3767.2	4018.7	4121.9	3935	4214.2
CAFS_HM_T_00014875	5615.1	6021.6	5654.3	5391.6	5788.3	6193.5	6137.1	5668.9	5903.6
CAFS_HM_T_00045250	2263.9	2352.8	2350.1	2378.7	2362.8	2650.1	2414.1	2354.6	2393.6
CAFS_HM_T_00006831	5655.1	5761.2	6136.9	5079.2	4919.6	5467.2	5020.8	5317.7	5159.7
CAFS_HM_T_00078205	5608.5	5621.9	5797.7	5801	5711.1	5648.1	5322	5987.6	5857.9
CAFS_HM_T_00016252	3486.9	3280.8	3408.1	3366.5	3340.7	3490.9	3289.4	3560.9	3463.6
CAFS_HM_T_00024851	2742.7	2648.2	2243.9	2769.8	3025.3	2625.2	3277.9	3312.9	2571.3
CAFS_HM_T_00032587	319.6	329.8	339.3	348.4	311.4	333.6	343.4	350.1	355.9
CAFS_HM_T_00091719	496.1	510.8	511.3	488	496.4	517.5	533.5	505.2	540.6
CAFS_HM_T_00063185	5781.9	5706.4	5700.5	5795.4	5751.2	5838.4	5688.2	6527.1	6338.7
CAFS_HM_T_00063071	4509.7	4228.9	4644.1	4440.7	4231.3	4210.1	4464.2	4201.7	4467
CAFS_HM_T_00052005	6316.6	7599	5928.5	5022.8	5098.2	7579	6988.1	4543.7	6366.9
CAFS_HM_T_00012421	5243.9	5809.6	5352.9	5242.3	5356.9	5618.9	5561.2	5168.2	5484.6
CAFS_HM_T_00018776	6486.3	6186.1	6373.2	6622.7	6370.3	6548.8	6085.5	6429.3	6451.2
CAFS_HM_T_00021115	5374.4	5642.2	5041.4	5241.1	5223.3	5357.7	5539.6	5345.1	5235.1
CAFS_HM_T_00090516	1675.1	1684.5	1858.2	1796.5	10524.5	1786.9	10749.3	1740.4	2000.8
CAFS_HM_T_00045124	5113.6	4374.4	4762.4	4897.5	5150.7	5928.6	4706.6	4972.8	6008.9
CAFS_HM_T_00000544	745.7	757.4	692.4	724.2	733.1	724.4	748.8	673.9	701.7
CAFS_HM_T_00035464	4867	5172.3	4972.3	4749.3	4765.5	4954.5	4997.1	4667.2	4811.1
CAFS_HM_T_00062038	7431.1	7872	7116.4	7329	7064.5	7529.2	7555.6	6920.6	7286.2
CAFS_HM_T_00010304	5236.7	5027.5	5266.6	5034.7	5184.7	5147.9	5210.1	5144.3	5169.2
CAFS_HM_T_00018049	5152.9	5156.7	5171	5359.5	5297	5015.4	5047.9	5299.8	5196.2
CAFS_HM_T_00013460	6920.4	7237.3	7862	7178.2	7195.8	7346.1	7329	7896.1	7155.1
CAFS_HM_T_00066681	5364.1	4820.1	5679.1	5581.6	5357	5024	4658.8	5757.1	5083
CAFS_HM_T_00076552	7053.6	7485.6	7342.2	7829.1	8299.6	7793.2	7705.8	9165.8	7859.1
CAFS_HM_T_00010014	4976.4	4541.3	5202.5	5283.5	4984.7	4727.7	4579.8	5352.7	4849.6
CAFS_HM_T_00009042	3260.1	3088.9	3544.6	3254.9	3202.2	3382.9	3161.6	3408.8	3244.5
CAFS_HM_T_00001457	6518.3	6238.6	6601.3	6446.6	6542.7	6489.5	6141.2	6731	6472.7
CAFS_HM_T_00068283	5927.6	5850.6	5873.5	5928.3	5839.3	5608.9	5564.1	5870.9	5709.7
CAFS_HM_T_00035656	3513.3	3448.1	4590.3	3499.9	3578.8	4011.7	3856.7	3451.3	4493.9
CAFS_HM_T_00069561	4249.7	4274.9	4575.1	4111.2	3883.4	4797	4220.6	4200.7	3983.3
CAFS_HM_T_00021569	5325.9	4679	5221.3	5267.4	5248.7	5048	4654.5	5584.2	5126.8
CAFS_HM_T_00038216	3902.6	3984.2	3892.6	4096.4	4225.9	3938.7	3968.5	4200.8	3989.1
CAFS_HM_T_00004948	6254.6	6406.1	6570.9	6253.2	6105.4	6300.8	6529.3	6171.9	6377.8
CAFS_HM_T_00079405	7388.8	7529.3	7064	7236.9	7370.7	7056.3	7638	7185.7	7239.8
CAFS_HM_T_00029688	3084	3044.5	3145.4	3160.4	3157.5	3058	3063.2	3285.7	3229
CAFS_HM_T_00061833	4232.6	4335	3956.6	4047.1	3998	4411.6	4142.4	3972.9	4208
CAFS_HM_T_00031348	5520.8	5370.4	5499.3	5396.4	5549.3	5336.4	5526.4	5263.5	5308.6
CAFS_HM_T_00041145	3894.2	5019.9	4437	4322.3	4376.7	4619.2	4571	4104.8	4497
CAFS_HM_T_00072531	5036.5	5121.8	5038.6	4967.1	5256.8	4818.3	5117	5008.8	4973.9
CAFS_HM_T_00066604	7684.3	7420.1	6983.6	7373	7354.3	7194.1	7344.7	7564.9	7450
CAFS_HM_T_00067316	2889.4	2611.9	3002.7	3188.4	3301.8	2783.9	2856.6	3422.6	3025.4
CAFS_HM_T_00017811	3990.2	3698.6	4048.5	4002.7	3899.8	3797.4	3926.3	3968.6	4051.4
CAFS_HM_T_00033362	2286.3	2493.8	2632.8	2360	2054.2	2398.4	2186.2	2261.6	2263.3
CAFS_HM_T_00054075	4936.9	4819.1	4820.3	5027.2	5043.5	4794.1	5051.8	5099.7	5080.2
CAFS_HM_T_00011903	7923.1	8062.5	8032.4	8096.5	7772.8	7770.7	7953	7722.6	7850.6
CAFS_HM_T_00031229	7935.3	8301.5	7308.3	7912.3	7725.8	7945.1	7935.3	7585.2	7856.4
CAFS_HM_T_00073050	3985	3728.1	3978.5	4007.2	3782.3	3611.6	3637.1	4011.8	3722.3
CAFS_HM_T_00078102	7464.9	7450.3	7606.1	7549.1	7560.5	7041.4	7222.5	7463.6	7343.4
CAFS_HM_T_00032556	7940.5	7703.7	7904.1	7570	7969.7	8056.7	8172.9	7665.6	7954.2
CAFS_HM_T_00033281	5432.5	5441.4	5449.2	5293.3	5325.9	5613.1	5404.4	5235.4	5334.5
CAFS_HM_T_00085854	2875.2	2677.2	3080.7	2961	3008.2	2784.2	2694.3	3116.2	2889.3
CAFS_HM_T_00058881	2077.5	2280.4	1817.9	1916.1	1842.8	2166.4	2083.6	1814.6	1902.5
CAFS_HM_T_00077598	5831.9	5957.2	5548.1	5750.6	5949.6	5614	5920.1	5339.8	5575.7
CAFS_HM_T_00039353	6787.2	7200.5	5996.6	5922	6364.4	6352.2	7076.2	5523.4	6321.1
CAFS_HM_T_00008540	7921.8	7037.1	8138.3	8159.1	8150.1	7466.9	7358.8	8546	8153.1
CAFS_HM_T_00069191	7813.4	8331.9	5949.8	6455.7	6802.2	7848.8	7526.2	7721.4	7379.5
CAFS_HM_T_00046263	3840.3	3730	3641.2	3626.9	3667.8	3491.5	3600.5	3716.7	3653
CAFS_HM_T_00008975	2247.3	2179.7	2308.6	2423.3	2481.2	2202.9	2376.8	2335	2300.8
CAFS_HM_T_00018586	4243.2	4012.6	3892.4	4362.6	4625.5	3854.3	4345.4	3970.4	4270.7
CAFS_HM_T_00000705	5402.2	4898.4	5268.4	5175.1	4768.2	5122.1	4886	5173.9	5177
CAFS_HM_T_00053251	4687.3	5219.6	4879	5129.2	5607.4	5683.7	5888.3	5212.5	5513.9
CAFS_HM_T_00049353	1053.7	1062.8	1065.9	1077.1	1063.8	1077	1070.3	1101.8	1154.4
CAFS_HM_T_00001240	646.7	740.4	702.9	702.7	671.5	641.9	727.1	592.8	678.7
CAFS_HM_T_00059797	5203	4919.8	5139.7	5052.9	4863.9	4875.7	4765.4	4978.9	4857.5
CAFS_HM_T_00073537	4908.8	4742.5	4744.7	4609.1	4976.3	4308.6	4625.7	4799.2	4823.1
CAFS_HM_T_00022594	7026.9	6756.6	6663.4	6986.5	6578.5	6902.4	6885.3	5682.3	6783
CAFS_HM_T_00041384	8847.7	9359.2	9052.1	8731.9	8643.2	8979.8	9155.1	8626.5	8764.6
CAFS_HM_T_00042530	4744.6	4593.9	4824.5	4772.5	4814.3	4725.7	4804.5	4887	4734.3
CAFS_HM_T_00050263	5688.9	6217.4	5529.1	5531.8	5574.8	5221.6	5976.4	5280.3	5810.9
CAFS_HM_T_00034209	155.2	150.6	148.6	175.3	171	165.6	150.1	166.5	163
CAFS_HM_T_00009206	8687.8	8270.8	8521.4	8145.4	7594.8	8478.6	7900.5	8243.9	8171.5
CAFS_HM_T_00007894	3377.6	3165	3456.4	3378.1	3409.8	3223.7	3575.3	3464.6	3472.3
CAFS_HM_T_00062847	6754.1	6264.2	6945	6820.7	6811.9	6356.2	6687.1	6811.3	7052
CAFS_HM_T_00089103	5292.6	5494.9	5322.7	5689.4	5550.5	5489	5375.1	5526	5474.7
CAFS_HM_T_00056370	9227.7	9168.8	8912.1	8777.3	8057.9	8552.7	8600.3	8571.5	9090.2
CAFS_HM_T_00003342	5397.2	5695	5547.2	5291.4	5356.9	5809.5	4414.3	4950.4	5055
CAFS_HM_T_00071811	6330.4	9362.7	6231.6	8230.5	9240.8	7209.3	7769.5	7031.9	7444.7
CAFS_HM_T_00037200	1723.9	1657.9	1748.3	1797.8	1878.9	1609.9	1703.4	1835.4	1807.7
CAFS_HM_T_00069616	3980.8	4281.6	3996.6	4157.7	4072.9	4222.9	4013.8	4211.5	4166.5
CAFS_HM_T_00013787	3775	4003.9	3977.3	4120.9	4209	3918.3	4135	4173.6	3924.6
CAFS_HM_T_00063632	4570.2	4140.1	4589.2	4577.2	4609.7	4059.9	4262.6	4680.2	4592.7
CAFS_HM_T_00091900	166.3	189.1	175	180.6	197.5	178.6	165.1	194	169.8
CAFS_HM_T_00062028	6349.6	6322.6	6262.5	6230.7	5971.1	6302.6	6789.1	5995.2	6477.9
CAFS_HM_T_00085942	8218	7275.7	8280.4	8036.5	8214.1	7712.8	8294.1	8494.4	7916.6
CAFS_HM_T_00044595	6422.8	6142.6	6170.2	6214.3	6416.6	5913.7	6064.6	6079.4	6164.8
CAFS_HM_T_00011576	4507.8	4672.8	4573.2	5358.8	5431.7	4909.4	5395.9	4592.3	4870.5
CAFS_HM_T_00030353	4303.7	4305.6	4449.7	4247.5	3829.9	3969.2	4137.7	4245	4397.4
CAFS_HM_T_00090923	4217.8	4533.5	4186.2	4600	4753.8	4203.9	5556.8	4232.7	4306.9
CAFS_HM_T_00018125	1732.6	1614.1	1729.2	1764.9	1764.4	1923	1503.5	2130.4	1802.5
CAFS_HM_T_00024296	6320.5	6257.6	6302	6367.8	6471.1	6161.8	6006	6661.9	6285.1
CAFS_HM_T_00088094	5884.5	6479.2	5749.8	5942.8	6500.4	6110.9	6334.3	5825.2	6410.1
CAFS_HM_T_00016435	6443.3	6797.9	6898.8	6647.4	6429.3	6680.8	7086.9	6903.8	7140.7
CAFS_HM_T_00060769	7262	7281	6482.6	6419.8	6593.4	7842.2	7025.7	7178.4	7623.3
CAFS_HM_T_00071994	2483.1	2769.6	2179.4	3070.5	3622.2	2504.3	3496.4	2438.1	2865.2
CAFS_HM_T_00028934	6010.8	5843.1	5905.1	5852.9	5753.3	5529.9	5701.6	5959.2	5777.1
CAFS_HM_T_00058021	4182.8	4360.4	4012	4254.9	4352.4	4236.9	4458.8	4242.6	4314.1
CAFS_HM_T_00016432	4842	5013.4	4638.2	5121.3	4967.1	4807.1	4946.5	4961.7	4784.7
CAFS_HM_T_00088644	2075.9	2114	2085.1	2112.2	2164.5	2104.8	2119.8	2131.2	2103
CAFS_HM_T_00083247	7367.6	7288.5	7555.1	7253.2	5400.5	6755.2	6558.2	6803.4	6463.5
CAFS_HM_T_00037959	6000.9	5874.5	6175	5667.6	5812.3	5922.3	5818.6	5966.6	5875.9
CAFS_HM_T_00003570	5091.6	4906.4	5122.1	5199.1	5541.6	4909.6	5198.3	5163.6	5007.8
CAFS_HM_T_00029392	1699.6	1639.8	1787.1	1749.2	1857.4	1699.4	1724.3	1908.7	1769.3
CAFS_HM_T_00081120	4646.6	4548.9	4736.9	4747.3	4573.8	4509	4538.4	4775.3	4611.8
CAFS_HM_T_00040451	2715.9	2634.6	2723.9	2706.7	2720.5	2854	2860.3	2737.4	2762.3
CAFS_HM_T_00051687	6956.7	6730.6	6762	6768.8	6714.5	6507.5	6715	6871.7	6875.1
CAFS_HM_T_00067549	4679.8	5143.3	4771	4997.9	5790.1	4786.2	5237.8	4551.9	5192.7
CAFS_HM_T_00042104	2649.8	2709.8	2530.9	2585.8	2618.1	2575.4	2692.1	2504.9	2705.4
CAFS_HM_T_00033486	5123.6	4888.8	5106.3	5040.8	5142.6	4897.2	4922	5228	5072.2
CAFS_HM_T_00038520	1821	1836.1	1817.9	1737.8	1803.5	1926.7	1925	1715.3	1732
CAFS_HM_T_00067055	879	1076.9	990.3	971	995.7	1029.9	1034.3	1084.7	1411.1
CAFS_HM_T_00077286	6720.6	6207.2	5070.4	6559.1	7722.2	8146.3	7309.3	6949	5994.9
CAFS_HM_T_00016133	648.6	498.2	344.6	486.2	495.4	797.4	566.3	708	871.2
CAFS_HM_T_00031409	3913.7	4213	3875.8	4108.1	4658	3742.4	4407	3621.8	4017
CAFS_HM_T_00068113	3927.6	3691.5	4171.7	4128.8	3984.4	3958.6	3686	4375.3	4032.7
CAFS_HM_T_00068323	3840.9	3740.4	3724.1	3682.8	3587.3	4146.2	3383.7	4009.2	3692.1
CAFS_HM_T_00076702	7426.6	6864.9	7468.1	7857.3	7052.4	7076.7	7460.9	8804.6	8858.9
CAFS_HM_T_00079193	11871.2	11717.7	12053.1	11194.9	11273.8	12013	12042.4	10991.9	11285.8
CAFS_HM_T_00019072	2991.6	2992.9	3116.7	3039.1	3142.7	3018.5	3087.4	3158.9	3091.8
CAFS_HM_T_00030006	4810.8	4617.2	4885.3	4357	5063.3	4464.6	4623.4	4494	4580.1
CAFS_HM_T_00088929	6564.7	6456.2	6377.6	6236.3	6520.1	6387.7	6561	6389.6	6460.4
CAFS_HM_T_00048488	3043.5	2946.3	2964.5	2888	2943.2	2789.3	2922.2	2877.9	2874.5
CAFS_HM_T_00002728	6597.9	6658.5	6412.2	6389.7	6485.8	6466.2	6457.5	6651	6495.6
CAFS_HM_T_00012602	9476.8	14733.8	8142.4	15991.3	10091.8	8817.7	15116	11104	8991.8
CAFS_HM_T_00070795	5228.2	5020.8	5218.3	4991.8	5037.8	4856.8	5048.7	5342.4	5301.3
CAFS_HM_T_00011616	7423.5	7592.3	7848.9	7846.2	7840.3	7408.6	7638.3	7973.9	7959.5
CAFS_HM_T_00077445	1877.4	1781.4	1858.2	1901.1	1875.3	1804.4	1829.2	1916.9	1848.1
CAFS_HM_T_00079707	2516.5	2402.3	2326.1	2418.7	2506.9	2553.7	2421	2615	2634.3
CAFS_HM_T_00057047	6316.6	6283.9	6336.7	6079.4	6129	6190.9	6284	6408.4	6406.6
CAFS_HM_T_00053489	2984.9	2752.5	3147.6	3131.1	3069.6	3085.1	2995.7	3310	2992
CAFS_HM_T_00074253	4144.2	3980.1	4326	3905.6	3866.6	3919.1	3881.3	4069.8	3766.2
CAFS_HM_T_00021265	3686.7	3594.9	3653.7	3825.8	3784.1	3984.2	3575	3754	4195.3
CAFS_HM_T_00013580	798.4	820.4	810.6	849.6	860.3	833.9	829.3	860.7	838.3
CAFS_HM_T_00036669	12736.2	13029.4	12449.5	12830.3	12316	12405.7	12943.4	11524.7	11774.7
CAFS_HM_T_00055394	1622.9	1698.8	1705.9	1775.8	1893.5	1769.6	1814.2	1819.3	1701.6
CAFS_HM_T_00053124	6027.6	5303.7	5851.1	6267.8	6357.9	5590	5941.4	6214.5	5884.8
CAFS_HM_T_00076920	1867.3	1785.1	1730.5	1783.8	1806.2	1727.1	1899.3	1824.5	1800.3
CAFS_HM_T_00014524	5561.9	5967	5450.3	5435.2	5434.4	5656.1	5543.8	5430.2	5205
CAFS_HM_T_00052592	1355.4	1354.5	1340.1	1322.9	1376.6	1277.5	1330.9	1420.5	1433.3
CAFS_HM_T_00079203	2670.4	2560.8	2571.3	2614.1	2618.1	2585	2563.3	2639.1	2547.5
CAFS_HM_T_00037681	7855.4	8014.3	7947.5	7553.2	7426.1	7798.9	7564.2	7971.4	7823.4
CAFS_HM_T_00060445	7341.4	7510	7203.1	7342.8	7261.1	6832.4	6984.8	7062.7	7194.1
CAFS_HM_T_00048395	4892.5	4616.5	4611.2	4562.6	4767.6	4821.3	4975.8	4977.9	4656.8
CAFS_HM_T_00043102	5613.5	5554.5	5693.2	5463.6	5352.3	5884.4	5632.5	5161.3	5655.6
CAFS_HM_T_00015689	119.4	108.9	124.7	119.9	129.9	116.8	134.6	114.6	121.8
CAFS_HM_T_00018609	4649.2	4498.4	4770.6	4929.7	5413.6	4786.6	5065	5056.3	5097.6
CAFS_HM_T_00053158	5720.9	5810.3	5871.7	5725.5	5687.9	5732.5	5720.1	5780.2	6010.3
CAFS_HM_T_00009694	5613.2	5570.2	6010.8	5578.3	5238.9	5768.9	5987	5110.7	5507.8
CAFS_HM_T_00033135	6494.8	6436.6	6565.3	6814.1	6635.2	6289.2	6601.5	6753.6	6720.9
CAFS_HM_T_00013167	886.9	677.1	869.4	773.4	747.4	913.2	790.3	887.3	695.5
CAFS_HM_T_00060870	2295.8	2283.3	2335.7	2233.5	2406.3	2233.8	2306.7	2395.1	2322.1
CAFS_HM_T_00035662	4539.7	4505.4	4415	4233	4676	4549.2	4899.7	4170.9	4389.6
CAFS_HM_T_00088699	550.5	649.5	584.8	587.5	621	628.6	642.8	648.5	820.7
CAFS_HM_T_00091029	4135.6	4220.1	4284	4391.9	4277.4	4283.1	4322.4	4245.1	4383.3
CAFS_HM_T_00029911	6806	6775.8	7076.6	6950.1	6957.9	6748	6810.2	6988.8	6943.1
CAFS_HM_T_00079380	3669.2	3605.9	3580.9	3654.4	3729.3	3579.7	3732.1	3637.1	3608.1
CAFS_HM_T_00085115	4467.5	4289.4	4488.1	4479.9	4403.3	4362.3	4379.9	4406.1	4478.7
CAFS_HM_T_00018915	6394.9	6757	5304.9	6081.3	6453.1	6593.3	5929.7	6894.6	7151.7
CAFS_HM_T_00063827	5748.1	5508.5	5460.7	5461.8	5515.5	5474.9	5475.7	5507	5778.5
CAFS_HM_T_00090843	126	106.3	113	116.7	123.4	104	108.3	113	116.4
CAFS_HM_T_00072192	2042.3	2120.3	2023.5	1965.3	2001.3	2110.1	2101.2	1897.7	2004.2
CAFS_HM_T_00019339	3168.1	3051.9	3219.4	3340	3377.3	3075.2	3238.4	4000.4	3371.9
CAFS_HM_T_00075125	5731.9	5554.6	4814.9	5013.2	5161.2	5951.3	4793.8	6410.1	7217
CAFS_HM_T_00008960	4779.8	4644.5	4213.2	4424	4378.3	4336.6	4536.5	4480.6	4484.6
CAFS_HM_T_00028107	7741.3	7621.2	7824.9	7445.9	7683.5	7547.8	7223.5	7485.3	7406.2
CAFS_HM_T_00070417	5050.1	4867.4	5228.6	5208	5471.4	5147.6	4850.8	5478.2	5209.5
CAFS_HM_T_00085566	1154	1001	1211.1	1222.8	1221	1177.8	1152.5	1214.3	1152.7
CAFS_HM_T_00086398	3514.4	3520.4	3532.5	3594.5	3545.4	3649.3	3665.2	3580.6	3357.4
CAFS_HM_T_00055568	3734.4	3718.2	3694.8	3657	3720.3	3871.2	3700.5	3750.7	3806.3
CAFS_HM_T_00016669	431.7	459	376.2	437.7	433.2	462.6	410.1	472.8	460.7
CAFS_HM_T_00026185	4060.9	4141.2	3947	4097.1	4093.6	3941.3	3916.3	4021.5	4085.7
CAFS_HM_T_00070563	8879	9276.3	9160.7	9167.7	8635	8764.7	9638.4	9032.5	8872.5
CAFS_HM_T_00036429	5568.4	5954.2	5417	5425.4	6018.1	6119.5	6491.7	5400.3	5878
CAFS_HM_T_00088103	1521.6	1462.2	1401.5	1503.3	1442.3	1435.5	1401.1	1490.4	1408.8
CAFS_HM_T_00047347	3798.3	3572.6	3856.1	3578.3	3606.2	3729.1	3937.2	3599.2	3755.5
CAFS_HM_T_00090784	10143.4	10862.8	10969.3	11015.4	10938.9	10732.7	11064.3	11374.3	11448.1
CAFS_HM_T_00036819	1395.7	1372.5	1394.4	1430.9	1410.9	1381.7	1401.5	1437.5	1416.3
CAFS_HM_T_00008668	777.5	878.6	775.7	836.2	807.3	755.8	879.6	711.9	800.4
CAFS_HM_T_00021313	5391.9	4882.7	6228.1	5858.9	5733.4	5228	5600.2	6039	5606.6
CAFS_HM_T_00021481	4049.9	4766.8	3875.4	3494.5	3633.3	4312.2	4434.7	3430.2	3861.9
CAFS_HM_T_00077024	767.6	779.8	746.9	816.4	802.5	732.4	780.6	772.4	735.7
CAFS_HM_T_00033619	6253.3	6151.7	6258.6	6179.8	6334.5	6236.8	6409.1	6718.2	6491.4
CAFS_HM_T_00043184	7585.4	7224.9	7195.3	7291.1	7177.5	6809	7273.9	7159.8	7344.4
CAFS_HM_T_00051403	3838.2	3786.5	3780	3775.1	3761.4	3724	3836.9	3902.2	3704.5
CAFS_HM_T_00083007	6401.1	6200.9	6205	5794.3	5507.9	5880.8	5958.3	5164.9	5680.4
CAFS_HM_T_00037299	10000.9	11205.3	10137.5	9241.6	8922.9	10409.5	10464.4	9585.9	9362.1
CAFS_HM_T_00077233	2167.6	2098.9	2015.9	2081	1972.4	1946.4	1946.9	2038.8	1986.6
CAFS_HM_T_00034200	2345.6	2226.9	2395.4	2439.8	2461.2	2300.8	2248.6	2515.5	2387.2
CAFS_HM_T_00070491	4314.3	4448.4	4128.9	3476.4	3765.4	4289	4097.1	3628.5	4010.5
CAFS_HM_T_00008273	6682.8	6260.6	6725.4	6695.3	6932.3	6245.5	6433	6867.5	6531.8
CAFS_HM_T_00057231	3829.9	3133.7	4187.2	2702.5	3370.3	6090.2	3015.7	2457.2	3327.2
CAFS_HM_T_00034123	5705.8	5736.8	5679.4	5730.1	5678.9	5459.1	5529.6	5653.4	5356.6
CAFS_HM_T_00048637	348.8	302.5	438.4	373.2	318.1	392.5	384.8	357.1	342.6
CAFS_HM_T_00046804	8384.5	8483.6	8074.1	8249.1	8018.1	7850.9	8372.1	7845.9	7994.6
CAFS_HM_T_00058857	2010.2	2051.5	2355.9	2246.4	2153.3	2096.9	2044	2232.7	2308.8
CAFS_HM_T_00074064	3590.4	3707.8	3472.3	3793.8	3775.8	3662.3	3593.5	3701.9	3847.2
CAFS_HM_T_00070354	7980.7	7489.8	7841.9	7673.2	7940.6	7300	7524.3	7940.9	7581.4
CAFS_HM_T_00055842	6213.5	6013.1	6235.7	6203.4	6154.6	6201.2	6072.5	6536.1	6850.8
CAFS_HM_T_00047267	2670.2	2818.5	2617.1	2703.7	2701.6	2724.5	2659.6	2652.8	2657.1
CAFS_HM_T_00034377	3736.5	3609	3740.3	3675.2	3747.1	3654.6	3701.9	3252	3601.8
CAFS_HM_T_00057190	5021.7	4950.8	5428	5059.5	5147.9	4688.4	5061.7	5186	5112.4
CAFS_HM_T_00082589	4207.1	4289.5	4304.3	4240.1	4396.5	4206.9	4386.5	4087.3	4380.1
CAFS_HM_T_00067743	3729	3486.1	3919.9	4013.4	4077.7	3543.7	3651.3	4085.6	4205.5
CAFS_HM_T_00075796	4414.8	4373	4194.7	4466.5	4702.4	4925.8	4544.5	4361.9	4926.5
CAFS_HM_T_00010074	4809.4	5006.8	4470.4	4734.1	4780.6	4782.1	4992.6	4914.7	4945.4
CAFS_HM_T_00055819	4212.2	3858	4199	4143.8	4131.3	3965.7	4124.8	4047.3	4212
CAFS_HM_T_00040975	3893.7	3503.6	3803.2	3922.5	3742.5	3562.4	3290.5	3774.2	3666.4
CAFS_HM_T_00080016	5176.7	4424.3	5383.8	5052.5	4596.3	4682.3	4579	5180.9	4894.1
CAFS_HM_T_00037057	7180.4	7633.7	7178.8	7169.1	7790.1	7080.3	7297.7	7613.3	7025.1
CAFS_HM_T_00054509	2082	2112	1971	2039.8	2029.4	2007.3	2044.7	2040.5	2051.6
CAFS_HM_T_00009916	6513.1	6800.6	6627.2	6530.5	7286.6	7275.9	6958.2	7170.3	7047.4
CAFS_HM_T_00039756	2345.5	2258.9	2586.4	2395.9	2265.3	2433.4	2383.6	2537.9	2424.6
CAFS_HM_T_00058016	3182.3	3209.7	3093	3194.6	3179	3009	3087.8	3016.7	3074.5
CAFS_HM_T_00011843	1437.4	1362.6	1472.6	1418.2	1438.6	1377.1	1450	1417.8	1401
CAFS_HM_T_00051715	6386.2	6789.9	6876.1	6063.2	6171	6658.1	7036.8	6690.8	6715.9
CAFS_HM_T_00057675	1487.3	1669.3	1524.6	1722.8	1888.8	1473.2	1690.8	1778	1679.2
CAFS_HM_T_00020835	6436.7	6259.2	6398.3	6385.3	6058.9	5927.9	6172.9	6335.2	6249.4
CAFS_HM_T_00026099	4297.1	3813	4406.8	4713.4	4973.5	3964.2	4344.2	4997.6	4902.2
CAFS_HM_T_00070526	7720.3	7746.8	7742.5	8036.7	7711.2	7617.5	8015.1	7708.5	7511.6
CAFS_HM_T_00075789	3580.3	3278.4	3720.4	3714.4	3812.7	3406.6	3580.6	3692.5	3527.6
CAFS_HM_T_00071580	4670.7	4882	4676.4	4767	4568.3	4589.7	4566.3	4445.8	4485.8
CAFS_HM_T_00006370	3711.5	3343.7	3636.4	3586.8	3691	3384.5	3498.5	3626.7	3541.9
CAFS_HM_T_00049109	4173.7	4050.8	4132.6	4073.7	4261	4017.6	3929.5	4136.5	4156.8
CAFS_HM_T_00090003	7585.4	7359.8	7392.6	7107.5	7194.4	7197.6	7319	7326.8	7290.2
CAFS_HM_T_00070447	832.6	711.2	840	810.6	776.8	790.9	780	798.6	785.4
CAFS_HM_T_00071325	7409.3	10849.2	7306.3	9298	10796.8	8272.1	8890.2	7935.2	8243.4
CAFS_HM_T_00028559	3796.7	3947	3864.8	3850	3950.1	4021.6	4183.8	3712	3813.8
CAFS_HM_T_00057832	4162.9	3673.3	4364.6	4194.5	4149.7	3891.9	3996.9	4329.7	4179.6
CAFS_HM_T_00069763	5640.9	5655.9	5822.2	5859.3	5874.6	5729.1	5843.2	5983.5	5823.9
CAFS_HM_T_00048169	3039.9	2920.7	3202.5	3258.3	3150.4	3128.4	3136.7	3322.2	3177.6
CAFS_HM_T_00083362	6559	6470.2	6697	6571.4	6254.5	5976.8	6411.9	6414.4	6220.7
CAFS_HM_T_00073022	4738	4720.5	4646.3	4844.7	5231	4458.5	4764.2	4905.5	4861.5
CAFS_HM_T_00044065	5535.2	5377.5	5199.7	5261	5303.2	5153.5	5308.1	5311	5176.1
CAFS_HM_T_00037718	4033.7	4537	4212.2	4267	4181.4	4176.5	4315.8	4091.2	4286.5
CAFS_HM_T_00062655	5071.5	4822.9	4816.5	4719.3	4950.6	4541.1	4941.9	4574.1	4824.3
CAFS_HM_T_00027820	3099.6	3006.2	2862.6	7508.3	2987.9	3822.8	3033.4	5934.4	3417.6
CAFS_HM_T_00023085	4901.2	4703.6	4634.7	4690	4610.2	4750.5	4581.2	4802	5069.7
CAFS_HM_T_00090121	3399.9	3440.5	3689.1	3412.7	3308.1	3339	3044	3620.4	3308.9
CAFS_HM_T_00037961	4182.1	4064.6	4115.2	3924.1	4026.5	4076.5	4105.3	3792.6	4021.7
CAFS_HM_T_00085495	5958.7	5437.1	5982.5	5906.1	5897.7	5483.9	5763.5	6060.9	5784.5
CAFS_HM_T_00034302	3540.4	3529.1	3578.6	3599.8	3583.5	3532.9	3558.1	3598.8	3623.3
CAFS_HM_T_00017627	4500.5	4415.3	4482.6	4680.3	4520.9	4401	4341.4	4720.7	4524.6
CAFS_HM_T_00009980	6888	6663.8	6942.3	7017.8	6970.1	6849.5	7015.3	7071.9	7207.9
CAFS_HM_T_00062420	5380	5642.4	5476.9	5489.3	5502.4	5601.3	5564.7	5332.9	5490
CAFS_HM_T_00015851	5105.1	5807.6	4958.5	4588.2	4968.2	4946.9	5005.6	4930.6	5427.7
CAFS_HM_T_00046389	2963.7	2809.5	2775.8	2965.7	2936.9	2723.6	2752.7	2965	2775.9
CAFS_HM_T_00015614	417.7	497	467.5	489.1	528.1	4168.4	457.5	669.6	457.8
CAFS_HM_T_00021060	4145.6	4630.4	4042	4502.7	3890	4464.7	3954.6	4309.8	4129
CAFS_HM_T_00041170	4286.9	4042.1	3954.8	4220.2	4504.5	3934.9	4324.2	4348.9	4166.9
CAFS_HM_T_00058496	3763.1	3640.3	3777.5	3738.7	3783	3688.3	3633.2	3645	3851
CAFS_HM_T_00054819	1215.1	1401	1232.3	1470.8	1781.9	1334.7	1519.7	1280.7	1473.1
CAFS_HM_T_00034480	9328	11358.1	9264.2	10991.5	10798.3	9105.6	10058.1	8930.2	8030.7
CAFS_HM_T_00028841	4676.8	4894.9	4908.3	4831.1	4678.4	4915.5	4942	4488.2	4780.9
CAFS_HM_T_00027661	2923.3	2786.6	2881.6	2933.7	2974.6	2787.7	2861.9	2851.7	2962.9
CAFS_HM_T_00008224	505.3	520.3	592.4	692.3	654.8	645.5	671.3	528.1	554.6
CAFS_HM_T_00004151	4096	3921.7	4095.4	4074.6	4054.5	3836.4	4244.5	4124.8	4022.9
CAFS_HM_T_00077011	5678.4	5041.1	5962.1	5940.9	5673.1	5318.8	5005.6	6368.2	5528.1
CAFS_HM_T_00000309	3458.7	3543.5	3381.5	3406	3482.3	3477.8	3500	3377.5	3294.8
CAFS_HM_T_00045056	4854.2	5372	5349.8	5111.8	5337	5129.2	5140.6	5152.7	5254.4
CAFS_HM_T_00075342	2541	2708.4	2467.4	2623.4	2511.5	2561.9	2529.4	2706.6	2562.3
CAFS_HM_T_00055227	1977.3	1897.2	1844.1	1904.9	1894.8	1974.7	2153.5	1815.4	1905.2
CAFS_HM_T_00013276	2061.9	2031.1	2012	1997.9	2075.4	1933.7	1939.8	2019.8	2014
CAFS_HM_T_00041965	2839.6	2743.6	2793.3	2784.3	2734	2742.7	2727.4	2803.3	2718.6
CAFS_HM_T_00051016	5885.4	5927.3	5623.3	5524.7	5549.2	5521.1	5522.1	5395	5611.2
CAFS_HM_T_00034784	4627.2	4637.7	5008.3	4702.1	4651	4775.6	4563.6	4910.3	4815
CAFS_HM_T_00032670	3829.3	4013	3605.7	3432.5	3465.8	3881.4	3703	3494.6	3957.7
CAFS_HM_T_00008618	3637.3	3567.2	3416.9	3423.8	3382.3	3442.6	3646.6	3431.6	3162.5
CAFS_HM_T_00001225	612.1	665.3	694.5	632.3	720.4	672.4	851.9	624.1	699.2
CAFS_HM_T_00069939	221.3	187.8	186	218.5	214.9	166.4	186.3	201.2	207.2
CAFS_HM_T_00054900	1830.3	1965.7	1846.2	1767.9	1784.2	1980.9	2048.9	1829.3	1817.8
CAFS_HM_T_00029151	857.2	864.7	849.4	896.5	852.3	881.9	892.3	918.4	969.2
CAFS_HM_T_00049206	4281.7	4144	4224	4097.6	4205.6	4183.8	4201.7	4239.1	4218.9
CAFS_HM_T_00059556	2510.7	2388.3	2007.6	2128.7	2282.6	2410.6	2214	2652.8	2185.2
CAFS_HM_T_00077775	4951.7	4679.2	5051.8	4706.6	4698.1	4475.3	4670.6	4565.5	4675.4
CAFS_HM_T_00013171	4674.1	4871.9	4852.9	4821.6	4760.7	4630	4665.4	4923.3	4990.1
CAFS_HM_T_00064934	5742.4	5914.5	5906.7	5617.3	5503.8	5923.9	5852.7	5552.3	5912
CAFS_HM_T_00064836	3820	3875.8	3909.7	4023.8	3939	3887.9	3658	4175.7	3773.4
CAFS_HM_T_00035435	679.4	632.2	741.9	693.6	724.1	678.7	661	711.7	709.9
CAFS_HM_T_00091702	3174.1	3134.7	3041.3	3227	3247.3	3055.8	3121.8	3207.6	3075.6
CAFS_HM_T_00028175	2617.6	2954.3	2847.9	3210.2	3547.4	2999.3	2895.5	3434.4	3101
CAFS_HM_T_00013589	4283.5	3985.2	4238	4306.5	3934.5	3898.9	3926.6	4212.4	4220.7
CAFS_HM_T_00029107	5903.2	5807.7	5778.9	6061.5	6086.7	5753.8	5675.5	5985.2	5947.1
CAFS_HM_T_00015516	4448	4290.9	4403.4	4495.2	4654.4	4358.8	4334.3	4627.7	4602.8
CAFS_HM_T_00055664	3638.7	3405	3522.6	3571.4	3602.1	3472.8	3270.1	3742.6	3511
CAFS_HM_T_00010415	3875.5	3793.6	3711.9	3721	3648.6	3492.2	3464.1	3555.7	3558
CAFS_HM_T_00045863	3098.1	3156.1	3245.5	3097.7	3130	3301.7	3202.1	3160.9	3212.5
CAFS_HM_T_00082500	2799.9	3014.2	2808	2688.8	2690.8	2848.6	2899.5	2628.9	2781.9
CAFS_HM_T_00085016	8923.1	11561.1	8376	10844.1	10048.1	9783.9	9512.9	9013.4	8791
CAFS_HM_T_00086665	2869.7	2882.8	2892.2	2734.3	2852.9	2841.4	2924	2900.4	2809.6
CAFS_HM_T_00071211	3898.8	4565.1	3947.3	4443	4854.5	4233.2	4327.6	3963.3	4122.4
CAFS_HM_T_00042260	2911.8	2902.2	2795.8	2944.6	3108.4	2771	2873.8	3062.8	2909.9
CAFS_HM_T_00044087	228.6	206.6	202.6	254	241.6	208.2	210.3	247.3	239
CAFS_HM_T_00065752	2152.2	2024.9	2150.7	2096.4	2047.3	2081.9	1980.7	2225.8	2079
CAFS_HM_T_00007395	9258.6	8811.1	10283	8631.9	8888.1	10097.3	10364	9382.4	9153.8
CAFS_HM_T_00062063	6120	6237.9	6207.3	6004	6672.8	6582.5	6179.2	6874.3	6973.1
CAFS_HM_T_00074514	3876.7	3743	4002.4	3938.6	4187.5	3627.2	3961.6	4188.9	3992.5
CAFS_HM_T_00011536	2728.6	2665.5	2797.2	3160.8	3157.3	2452.1	2444.1	3426.2	2901.7
CAFS_HM_T_00018085	2155	2070.2	2160.4	2135.4	2190.9	2061.4	2219.8	2137.7	2164.5
CAFS_HM_T_00058131	3018.6	2968.1	2913.5	2922.7	2842.6	2911.9	2815.4	2833.5	2897.9
CAFS_HM_T_00008246	2967.9	3136.9	2736.2	2573.7	2647.7	3168.5	3222.2	2499.1	3006.6
CAFS_HM_T_00019098	5112.6	5047.7	4762.8	5147.6	5149.3	4759.6	4895.1	5022.2	4719.9
CAFS_HM_T_00028114	3936	4085.7	3956.7	4072.3	4010.1	3732.2	3985.7	3896.4	3867.1
CAFS_HM_T_00061077	3770.8	3894.9	3472.9	3556.4	3582.9	3510.4	3734.9	3494.9	3668.7
CAFS_HM_T_00090703	4627.3	4709.6	4420.1	4373.2	4162.5	4322.5	4645.2	4373.9	4641.5
CAFS_HM_T_00015013	2633.7	2502.8	2567.3	2602.8	2654.1	2505.2	2516.9	2855.1	2661.2
CAFS_HM_T_00022309	3836.4	3863.3	3721.2	3827	3785	3784.9	3596.5	3900.5	3783.1
CAFS_HM_T_00005098	4060.6	4106.9	4151.7	4199.8	4308.7	3823.3	3945.6	4219.2	4205.2
CAFS_HM_T_00057012	5853.2	5258.6	5937.7	5965.5	5931.3	5398.1	5393.5	6067	5725.8
CAFS_HM_T_00011011	2726	2659.7	2618.9	2861.9	2705.1	2446.2	2464.7	2569	2749.1
CAFS_HM_T_00048401	5001.9	5594.1	4769.2	3987.8	4005.7	4797.5	4936.6	3536.1	4145.6
CAFS_HM_T_00020162	5111.5	3409.7	6518.9	6134.2	4666.8	4328.5	5005.8	6081.2	5038.5
CAFS_HM_T_00051875	339.7	318.4	334.6	339.4	318.7	328.3	311.6	339.7	340.8
CAFS_HM_T_00054653	642.2	666	574.1	574.1	612.5	681.6	677.7	607.7	640.6
CAFS_HM_T_00042861	3916.6	3868	3714.9	3833	3886.4	3662.2	3709.2	4007.6	3868.4
CAFS_HM_T_00027846	4681.3	4307.3	4798.2	4791.8	4880.1	4437.3	4677.7	5049.9	4724.7
CAFS_HM_T_00069351	1004.6	1012.3	1003.8	942.7	981	1008.8	1055.1	971.7	1016.5
CAFS_HM_T_00080729	4402.4	4859.4	4837.2	4541.9	4589.1	4893.8	5026.7	4390.9	4625.7
CAFS_HM_T_00076854	317.7	288.7	330	269.1	285.7	300.8	291.2	279.2	289.5
CAFS_HM_T_00042664	4508.8	4591.3	4659.2	4607.3	4524.2	4560.1	4769.5	4414.7	4650.3
CAFS_HM_T_00019364	2477.4	2503.9	2547.6	2583	2544	2502.7	2534.6	2646.8	2473.2
CAFS_HM_T_00031153	4741.8	4912	4272.8	4790.2	5001.7	4721.7	4955.6	4881.9	4983.1
CAFS_HM_T_00015619	1092.3	1063.8	818.6	928.4	858.2	1013.8	854.3	908.5	834.8
CAFS_HM_T_00055425	6201.9	6111.4	5960.2	6386.7	6333.1	5891.3	5957.6	6351.7	6221.5
CAFS_HM_T_00072413	3543.3	3532.5	3535.4	3577.2	3447.2	3514.7	3480.9	3478.1	3578.6
CAFS_HM_T_00018748	1751.9	1830.6	1857.6	1755.3	1738	1886.6	1842.7	1733	1868.4
CAFS_HM_T_00058811	4950.9	5035.2	4981.4	4848.1	5137.6	4953.3	5052.1	4938.7	5138.5
CAFS_HM_T_00065804	4958.2	4744.8	5047.5	4491.1	4169.7	4610.8	4936.2	4445	4576.6
CAFS_HM_T_00077499	3155	3013.4	3211.7	3330.4	3069.7	2984.4	3080.9	3186	3209.5
CAFS_HM_T_00005902	113.3	114.3	98	144.8	124.3	1704.3	124.3	206.8	123.1
CAFS_HM_T_00079530	5515.6	5163.9	5464.3	5378.7	5252.9	4929.7	5130.1	5252.1	5320.5
CAFS_HM_T_00053607	3354.7	3136.5	3257.5	3268.3	3098.6	3155.3	3055.3	3337.3	3204.3
CAFS_HM_T_00070298	5835.8	5880.9	5458.5	5801.9	5632.3	5613	5616.8	5659.5	5548.3
CAFS_HM_T_00026076	664.5	655.9	709.1	695.9	711.7	661.3	703.7	694.6	669.1
CAFS_HM_T_00058233	4501.9	4597	4560.5	4414.7	4438.3	4686.8	4361.3	3987.5	4358.8
CAFS_HM_T_00010891	3814	3730.4	3776.1	3771.4	3606.5	3515.8	3672.4	3558.5	3679.8
CAFS_HM_T_00035269	1451	1390.2	1506	1556.1	1533.8	1439.5	1512.4	1499.6	1478.2
CAFS_HM_T_00016637	3029.3	2851.5	3088.4	3162.3	3140.8	2901	2798.6	3159.8	3045.4
CAFS_HM_T_00080753	1140.4	1315.9	1222.7	1237.4	1794.5	1561	1638	1369.2	1493.5
CAFS_HM_T_00001696	3606.8	3770.5	3424.4	3704	3919.8	3772.5	3703.6	3865.7	3921.2
CAFS_HM_T_00048124	891.4	885.6	894.4	884.6	903.3	916.4	966.8	868.5	903.6
CAFS_HM_T_00019875	5925.7	5958.8	5839.7	6030.8	6115.6	5639	5978.6	5991.2	5757.5
CAFS_HM_T_00053257	4670.2	5032.2	4723.6	4899.6	5690.8	5594.2	5869.3	5096.9	5461.8
CAFS_HM_T_00068196	1865.4	1913	1897.2	1934.2	1954.6	1926	1881.5	2000.3	1993.3
CAFS_HM_T_00058247	2613.2	2591	2602.1	2762	2742.9	2841.5	2612.9	2673.6	2629
CAFS_HM_T_00033384	2339.7	2226.2	2545.5	2385.2	2365.6	2237.6	2255.6	2501.5	2496.1
CAFS_HM_T_00009902	4138.5	4155.6	4209	4258.6	4178	4105.2	3954.3	4543.3	4227.5
CAFS_HM_T_00021360	1601.9	1594.5	1562.4	1493.1	1507.2	1538.1	1524.8	1492.8	1550.6
CAFS_HM_T_00028027	3666.5	3711.9	3814.2	3526.1	3696.7	3829.7	3773	3652.4	3639.7
CAFS_HM_T_00047183	5110.8	4964.2	5185.7	4600.1	3946.1	4576.3	4537.2	4392.5	4638.2
CAFS_HM_T_00076554	4018.9	4075.8	3924.6	3840.9	3856.2	3754.4	3827.3	3899.8	3849
CAFS_HM_T_00077616	3110	3278.6	2932.4	2939.3	2979.6	3053	3037.1	3065.2	3032.1
CAFS_HM_T_00017517	3292.6	3742.7	2866	2743.9	2684.4	3155.9	3195.4	2452.1	3105.5
CAFS_HM_T_00055320	4276.4	4133	4092.9	4039.6	3776.3	3734.4	4021.3	3936	3978.8
CAFS_HM_T_00017031	2466.5	2738.3	2512.5	2757	3267.8	2589.4	2805.2	2816.5	3042.7
CAFS_HM_T_00083467	2235.8	2256.3	2300.3	2326	2317.6	2301.6	2237.3	2417	2307.2
CAFS_HM_T_00075842	5518	5515.8	5301.8	4997.2	5126.5	5589.5	5318.7	5257.6	5363.6
CAFS_HM_T_00064310	4733.1	3935.8	5503	4728	4057.9	4457.6	3907.5	4644.7	4289.6
CAFS_HM_T_00024520	2411.5	2708.5	2251	2337.5	2358.1	2647.3	2462.1	2322.1	2294.3
CAFS_HM_T_00034495	4332.2	4264.1	4208	4347.8	4274.7	4081.7	4122.9	4461.6	4299.6
CAFS_HM_T_00015238	3142.4	3117.4	3420.9	3368.2	3464.5	2992.7	2898.4	3586.3	3061.6
CAFS_HM_T_00080480	6032.9	6025.4	5510.5	5503	5481.3	5629.2	5376.7	5630.9	5770.5
CAFS_HM_T_00009572	3962.2	3765.3	3848.8	4016.3	3980.7	3671.3	4037.1	3906.3	3777.4
CAFS_HM_T_00073885	3401.9	3209.5	3530.3	3487.7	4023.9	4354.4	3410.4	3843.4	3916.4
CAFS_HM_T_00069036	8549.2	8690.2	8584.3	8414.8	8499.8	8546.3	8555.2	8806.9	8803.9
CAFS_HM_T_00021812	1873.9	1893.7	2058.5	1842.2	1960.3	1967.2	2159.6	2020	2057.4
CAFS_HM_T_00046251	5548.6	5331	5911.3	5783.1	5679.4	5730.5	5281.7	6108.4	5859.5
CAFS_HM_T_00083590	1837.7	1711.8	1945.3	2003.9	2003.8	1880.3	1918.9	2036.5	1911.5
CAFS_HM_T_00064173	4982	4783.6	4805.6	4852.2	4787.1	4644.6	4841	4761.2	4608.4
CAFS_HM_T_00022776	4649.1	4902.6	4751.8	4572.9	4619.4	4761.2	4831.2	4375.4	4508.7
CAFS_HM_T_00040827	4268.6	4093.1	4026.5	4220.8	4200.7	4139	4109.2	4370.7	4232.3
CAFS_HM_T_00019838	1401.1	1387.6	1510.9	1465	1439.9	1426.3	1443.8	1428	1415.4
CAFS_HM_T_00074762	2967.2	2898.7	2832.2	2705.7	2786.6	2857.1	2907.4	2808.4	2758
CAFS_HM_T_00028202	3456.6	3440.2	3778.1	4048	3635.1	3436.8	3474.1	3596.7	3029
CAFS_HM_T_00021273	2554.7	2687	2622.4	2556.9	2448.4	2565.2	2677.4	2382.2	2635
CAFS_HM_T_00087516	4689.3	4779.2	4667.6	4524.6	4631.2	4565.9	4590.9	4575.6	4475
CAFS_HM_T_00065878	2053.2	2178.6	2095.5	2165.5	2317.9	2094.1	2179.5	2300.8	2201.5
CAFS_HM_T_00037469	6717.2	6671.1	6707.1	6823.4	6952.8	6372.7	6537.2	6936.2	6787.3
CAFS_HM_T_00083408	2085.9	2287.4	2241.7	2519.9	2690.5	2191.9	2207.1	2676.7	2410.3
CAFS_HM_T_00011334	2738.5	2717	2772.7	2858.7	2903.9	2733.4	2822.2	2881.1	2755.9
CAFS_HM_T_00048449	5218.4	5702.4	5411.7	5212.5	4863.6	5341.1	5110.4	5439.5	5030.5
CAFS_HM_T_00069120	5791	5156.3	6069.5	5426.1	5594.6	4864	5365.8	5287	5418.2
CAFS_HM_T_00000158	8277.2	8100.5	8436	7801.9	7919.4	8277.1	8550.3	7709.7	7910.5
CAFS_HM_T_00030647	816.3	839.4	785.5	832	827.7	760.7	810.2	784.7	755.7
CAFS_HM_T_00006604	5398.1	6336.2	5495.1	6769.1	6468.8	5797.2	6217.4	5859.6	5643.8
CAFS_HM_T_00085525	545.2	551.2	533.5	528.8	540.1	541.3	539.2	532.9	547.8
CAFS_HM_T_00065545	4717.1	4141.4	4957	4740	4740	4246.4	4283.4	5104.9	4723.2
CAFS_HM_T_00069966	1296.1	1231	1224.7	1229.2	1261.1	1202.8	1266.2	1280.5	1278.8
CAFS_HM_T_00067100	470.2	485.9	874.8	1368.9	1349.2	1409.8	966.6	631.9	1558.9
CAFS_HM_T_00038958	3909.9	4008.7	3977.6	3981.1	4137.5	3781.9	4073	4203.8	4036.8
CAFS_HM_T_00019699	1708.4	1671.2	1688.9	1695.3	1659.3	1728	1724.3	1768.8	1772.6
CAFS_HM_T_00083074	4556	4728.1	4351.5	4652.1	4608	4542.5	4252.2	4578.7	4644.1
CAFS_HM_T_00085009	4671.5	4485.9	4763.4	4604.2	4608.4	4391.2	4526.1	4822.5	4641.2
CAFS_HM_T_00015969	4194.9	3907.5	4528.7	4296	4204.6	4615.7	3655.2	4874.4	4293.7
CAFS_HM_T_00052115	3385	3376.4	3256.3	3252.3	3296.4	3211.2	3268.6	3221.2	3355.4
CAFS_HM_T_00026039	6341.3	6435.1	6637	5915.8	5886.9	6650.9	6506.1	5913.7	6168
CAFS_HM_T_00071666	773.9	723.4	701.5	724.6	726.4	682.1	703.7	688.7	717.1
CAFS_HM_T_00084142	2789.1	2648.9	2698.6	2727.3	2683.1	2631.4	2697.9	2610.7	2629.5
CAFS_HM_T_00077290	4383.3	4351.7	4536.4	4247.7	4107.4	4274.7	4130.2	4125.7	4182.6
CAFS_HM_T_00038524	3292.1	3100.4	3317.4	3385.4	3276.9	3026.2	3018.2	3442.6	3156.4
CAFS_HM_T_00059792	3178	3050.4	2968	3161.2	3163.2	3096.7	3034	3205.2	3083.6
CAFS_HM_T_00014168	3167.8	3244	3115.3	3056.2	3134.5	3516.6	3257.5	3000.9	3205.2
CAFS_HM_T_00063775	3685.5	3384.2	3409.4	3523.7	3443.6	3513.3	3337.2	3417.5	3432.1
CAFS_HM_T_00038304	4800.2	5407.9	4723.2	4176.4	4237.6	5180.4	5464.8	4116.9	4709.2
CAFS_HM_T_00053755	1241.1	1184.8	1255	1236.2	1252.2	1173.4	1197.5	1289.7	1190.9
CAFS_HM_T_00022484	3212.6	3193.8	3294	3342.9	3252.7	3164.8	3171.9	3281.7	3128
CAFS_HM_T_00041987	5040.2	4580.8	4810.5	4849.3	4801.9	4834.6	4651.4	4687	4693.2
CAFS_HM_T_00021839	4394	4222	4366.2	4426.1	4523.8	4268	4378.4	4615.8	4377.1
CAFS_HM_T_00034287	3907.2	3754.4	3969.3	3832.3	3838.3	3746.5	3856.7	3733.9	3860.7
CAFS_HM_T_00030521	5569.7	5528.2	5319.9	5634.7	5782.8	5223.4	5700.3	5897	5660.1
CAFS_HM_T_00017479	3358.9	2842.6	3243.5	3319.8	3451.5	3308.1	3156.1	3513.9	3669.2
CAFS_HM_T_00086755	4653.6	4825.1	4539.6	4455	4594.2	5113.7	4823.4	4277.5	5004.1
CAFS_HM_T_00051455	8559.2	9110.1	8300.7	9047.1	8393.4	8275.7	8691.6	8230.9	8147.6
CAFS_HM_T_00084358	2197	2162.7	2177.1	2226	2313	2060.8	2118.4	2219.4	2132.4
CAFS_HM_T_00044247	2105.4	1982.4	2291.9	2123.2	2097.2	2177.8	2094.3	2148.1	2065.2
CAFS_HM_T_00088720	3274.6	3337.1	3312.5	3430.7	3260.7	3232.4	3190.3	3353.3	3338.9
CAFS_HM_T_00027515	1911.1	1929	1981	2086.3	1910.3	1818.8	1873.4	2045.2	1815.3
CAFS_HM_T_00068410	2836.1	3001.6	2695	2834.3	2768.7	3064.6	3014.9	2808	2908.8
CAFS_HM_T_00045723	2916.3	2945.4	2850.8	2820.9	2763.5	2875.7	2912.9	2719.9	2900.1
CAFS_HM_T_00033843	3306.7	3613.7	3424.5	3300.4	3201.8	3568.2	3437	3205.2	3332.9
CAFS_HM_T_00066835	5771.4	5679.1	5871.5	5712	5629.6	5453.9	5672.7	5589.2	5411.2
CAFS_HM_T_00019974	4657.8	4489.6	4552.6	4611	4544.8	4374.4	4592.1	4543.9	4753.3
CAFS_HM_T_00080071	2326.1	2218.6	2285.9	2092.1	2112.6	2336.9	2344.6	2179.6	2481.2
CAFS_HM_T_00059358	4030.2	3995.7	4298.9	4781.6	4811.2	4259.9	4272.4	5185.8	4698.8
CAFS_HM_T_00054757	1994.8	1927.2	2010.1	2027.7	1926.2	1967.4	1995.1	2113	2063.5
CAFS_HM_T_00027779	4182.4	3780.5	4404.6	4447.2	4486.4	4038.4	4055.3	4617.2	4339.9
CAFS_HM_T_00070626	3742.4	3576.8	3658.7	3496.5	3645.9	3439.3	3687.4	3481.4	3569.1
CAFS_HM_T_00060472	3584.3	3413.7	4029.7	3706.8	3491.2	3535.1	3418.6	3582	3534.6
CAFS_HM_T_00042037	10062.4	10116.1	9806.6	9514.2	9229.1	9686.8	10104	9545.3	9387.6
CAFS_HM_T_00008889	1794	1591.7	1862.8	1774.7	1811.1	1754	1820.5	1758.5	1748.9
CAFS_HM_T_00009213	4272	4215.2	3968.1	4227.9	3931.3	3917.2	4122.5	3691.4	3930.4
CAFS_HM_T_00090222	4221.1	4220.5	3645.4	4075.8	4223.5	4303.4	4338.2	3801	4169.7
CAFS_HM_T_00058644	1382.3	1291.8	1331.2	1376	1388	1348.9	1368.7	1423.2	1381.9
CAFS_HM_T_00037508	5583.2	5264	6193.1	5918.1	5545.1	5681.2	5377.5	6327.4	5812.1
CAFS_HM_T_00074958	6910.8	7356.8	6915.4	6143.2	7028.9	6837.7	6717.7	6631.3	6448.5
CAFS_HM_T_00064199	3812.1	3697.4	3907	3691.9	3727.5	3689	3725.5	3828.9	3798.7
CAFS_HM_T_00070481	3738.1	3633.3	3643.7	4205.1	3987.6	3449.3	3562.1	4229.5	3894.8
CAFS_HM_T_00082931	1035.3	958.4	1026.3	1009.1	1047.9	1032.6	977.2	1014.7	1011.4
CAFS_HM_T_00036935	2271.8	2214.4	2320.1	2193.4	2249.6	2346.8	2284	2238.9	2281.7
CAFS_HM_T_00009647	4325	4177.6	4319.2	4422.4	4367.2	4437.4	4218.9	4282.3	4328.9
CAFS_HM_T_00056263	1378.2	1432.1	1318.8	1452.9	1395.6	1416	1431.9	1390.9	1341.2
CAFS_HM_T_00033330	3907.1	3778.7	3650.3	3923.2	3970.3	3616.7	3784.4	3989.8	4049
CAFS_HM_T_00090195	1423.4	1443.7	1375.1	1455.8	1447.6	1392.4	1449.2	1462.2	1398.3
CAFS_HM_T_00002780	5000.8	5850.2	4772.8	4839.6	5216.4	5271.7	5123.6	5190	5050.8
CAFS_HM_T_00058055	2910.5	2693.7	2967.7	2656.3	2539.7	2419.3	2518.8	2583.4	2726.9
CAFS_HM_T_00035442	2236.4	2346	2370.1	2139.7	1952.4	2229.4	2281.7	2024.4	2098.2
CAFS_HM_T_00007130	3974.9	3988.6	3873.5	3754.3	3849.6	3835.9	3961.5	3758.5	3896.1
CAFS_HM_T_00007115	3016.6	2942.5	3153.4	3042.1	2976.4	2891.1	3141.9	2957.7	3175.1
CAFS_HM_T_00052068	2486.5	2398.1	2700.7	2363.2	2246.3	2418.2	2420.2	2132.5	2360.4
CAFS_HM_T_00079213	580.5	552.2	553.7	613.1	615.7	597.5	572.4	639.9	564.7
CAFS_HM_T_00049442	1504.9	1388.5	1505.5	1432.2	1475.2	1520.3	1473.2	1494.8	1568.5
CAFS_HM_T_00072126	1241.3	1266.7	1269	1294.2	1257.5	1330.2	1257.3	1271.4	1256.8
CAFS_HM_T_00029757	4122.1	4215.2	3834.2	4192.8	4173.9	4021.2	3988.1	3983.7	4189.1
CAFS_HM_T_00063294	1032.9	947.6	1125.8	1042.4	964.9	1019.9	1034.7	1116.6	1020.6
CAFS_HM_T_00057814	2529.8	2548.9	2494.4	2469	2464	2386	2514.6	2388.8	2445.3
CAFS_HM_T_00036660	3567.3	3616.1	3293.7	3181.6	3155.3	3199.1	3594	3318.6	3591.5
CAFS_HM_T_00063501	6464.4	6819.2	6277.3	6454.8	6356	6437	6571.4	6171.3	6309.3
CAFS_HM_T_00090410	5181.2	5147.7	5237.6	4985.9	5163.7	5122.8	5233.5	4929.9	4959.3
CAFS_HM_T_00004093	2160.1	2086.8	2162.1	2071	2182.1	2057.7	2161.2	2161.9	2258.4
CAFS_HM_T_00003554	3855.6	4007.2	3944.3	3898.4	3975	3801.4	4083.5	3744.1	3840.9
CAFS_HM_T_00008117	3526.6	4047.1	3897.3	3317.9	3004.2	3564.1	3373	3155.2	3194.6
CAFS_HM_T_00060556	3242.9	3031.2	3243.4	3171.4	3118.8	2992.4	3069.8	3153.9	3191.1
CAFS_HM_T_00021106	1240	1316.6	1132.9	1160.2	1169.5	1206.7	1230.7	1090.3	1181
CAFS_HM_T_00058271	4411.5	4468.3	4502.4	4311.3	4169	4141.1	3922.9	4566.7	4323.5
CAFS_HM_T_00071010	5143.4	4056.7	6842.2	5492	4274.9	4118.5	4125	6152.6	4786.6
CAFS_HM_T_00069393	3157.2	3364.1	3303	3282.6	3108.8	3204.2	3553	2969	2970.8
CAFS_HM_T_00056866	4473.2	5199	4282.9	4229.9	4294.1	4331.9	4374	4053.1	4368.2
CAFS_HM_T_00005939	622.5	589.5	618.5	625.7	608.5	586.8	612.4	641.6	650.4
CAFS_HM_T_00049273	4030.6	3687.7	4314	4328.7	4258.4	3982.7	3910.6	4379.1	4219.4
CAFS_HM_T_00018426	5209.1	5339	4960.8	5125.9	5541.7	5037.3	5677.7	5116	5028.5
CAFS_HM_T_00040868	2878.1	2819.3	2643.5	2870.7	2841.2	2754.6	2677.4	2843.8	2774.6
CAFS_HM_T_00064081	7785.8	7780.6	7893.8	7751.4	7666.6	7480.9	7614.1	7876.8	7650.8
CAFS_HM_T_00045822	6044.1	5832.2	6251.4	5999.1	6082.4	5649.9	5738.4	6033.7	6029.5
CAFS_HM_T_00028048	5035	5047.3	5313.8	4951.3	4977.3	4752.8	5206.3	4919.5	5258.4
CAFS_HM_T_00060340	2525.8	2956.1	2406.8	2544.2	2641.9	2497.6	2673.5	2348.1	2415
CAFS_HM_T_00057848	5393.6	5503.1	5271.5	5387.3	5355.7	5284.7	5404.7	5594.8	5505.3
CAFS_HM_T_00064932	5106.5	5278.9	5046.7	5012.5	5053.2	5271	5358.2	5173.7	5212.7
CAFS_HM_T_00067653	4178.5	4286.2	4073.6	4407.9	4168.9	3995.5	4134.4	4195.4	4122.9
CAFS_HM_T_00007967	1862.1	1871.9	1850.1	1889.1	1865.8	1917.2	1896.7	1857.1	1817.6
CAFS_HM_T_00001305	3510	3395.1	3639.1	3439.5	3462.2	3580.8	3668	3553	3628.8
CAFS_HM_T_00067348	4029.4	3940.2	3812.7	4020.4	4003.4	3776.4	3949.6	3886.2	3907.1
CAFS_HM_T_00035338	5262.5	5343.8	5248.3	5361.8	5158.5	5517.9	5158.6	5756.8	5398.9
CAFS_HM_T_00071403	3047.2	3124.2	3168.6	3244.3	3149.1	3165.4	3208.8	3286.6	3271.9
CAFS_HM_T_00075301	4833.3	4818.8	4993.6	4854.2	4976.7	4865.2	4938.4	5042.3	4825.3
CAFS_HM_T_00018477	3967.8	3773.9	3747.2	3739.9	3835.9	3804.5	3705.9	3853.7	3918.7
CAFS_HM_T_00068756	2998.3	3196.7	3132	3037.6	3089.8	3177.3	3177	3121	3117.1
CAFS_HM_T_00081382	2674.1	2570.6	2561.4	2665	2603	2463.8	2484.3	2645.7	2676.9
CAFS_HM_T_00065561	4416.9	4242.2	4204.3	4243.4	4097.3	4114.6	4028.8	4236.7	4082.6
CAFS_HM_T_00029239	1485.1	1488.8	1454.6	1502.6	1601.1	1571.5	1431.3	1620.2	1514.1
CAFS_HM_T_00001865	4383	4207.1	4157.1	4324.3	4332	4021.3	3908.7	4494.8	4422.3
CAFS_HM_T_00086776	681.8	631.5	698.9	692.4	688.7	678.5	632.5	746.3	734.8
CAFS_HM_T_00057694	5352.7	4964.9	5169.5	5398.8	5784	5129	5198	5500.4	5393.6
CAFS_HM_T_00071700	5644.3	5781.7	5964	5792.3	5415.5	6531.5	6340	5577.8	5855.6
CAFS_HM_T_00017229	1701	1528.9	1804.5	1637.8	1505.5	1475.9	1401.7	1606.6	1557.8
CAFS_HM_T_00010396	1782.8	1700.2	1776.8	1826.8	1771.3	1561.5	1601.6	1828.1	1806.4
CAFS_HM_T_00004595	3086.2	2989	3113.6	3133	3088	3030.4	2882.9	3288.2	3070.5
CAFS_HM_T_00027584	5459.1	5716.1	5524.7	5537	5271.8	5123.7	5576.4	5245.9	5459.2
CAFS_HM_T_00039947	3416.2	3399.3	3390.4	3297.9	3183.3	3339.3	3315.3	3278.5	3240
CAFS_HM_T_00024315	1717.6	1660.6	1667.1	1593	1673.4	1696.7	1775	1607.5	1743.3
CAFS_HM_T_00081886	2043.6	1626.3	1436.4	1559.9	1486.8	2554.9	1327.3	2716.8	4059.6
CAFS_HM_T_00075094	4269.1	4373	4446.3	4422.9	4412	4393.7	4390.3	4425.5	4461.9
CAFS_HM_T_00065234	2029.2	2005.6	2130.9	2093	2147.4	2089.8	2208.5	2148.8	2134.1
CAFS_HM_T_00052341	2764	2678.9	2664.5	2626.9	2672.2	2652.2	2681.9	2675.2	2574.2
CAFS_HM_T_00030479	7256.8	7054.8	7243.5	6677.9	7162.4	7240.8	7840.9	6810.6	7073.6
CAFS_HM_T_00002484	610.9	774.2	880.6	850.8	707.6	762.6	816.4	680.3	772.5
CAFS_HM_T_00059330	1994	2153	1970.8	2018.5	2067.7	1949.5	2039.1	1883.4	2061.5
CAFS_HM_T_00003515	3653.6	3733.8	3975.2	3939.2	4090	3607.7	3949.9	3801.4	3774.4
CAFS_HM_T_00057251	3887.8	3722.5	3741.7	3855.3	3722.1	3622.7	3803.8	3863.2	3534.8
CAFS_HM_T_00062017	663.9	671.1	669.9	641.4	669.2	707.8	693.4	635.9	678.6
CAFS_HM_T_00068317	4202.8	3965.3	4318.2	4608.3	4445	4275.9	3989.6	4594.2	4115.4
CAFS_HM_T_00061653	4140.3	4173.3	4059.7	4009.5	3794.5	3956.1	3848.9	3854.6	3985
CAFS_HM_T_00039282	2510.4	2599.4	2366.7	2463.5	2437	2427.8	2487.1	2516.8	2357.2
CAFS_HM_T_00052124	3586.3	3321.7	3299.8	3070.7	3274.5	3298.4	3414.2	3169.1	3683.8
CAFS_HM_T_00013500	3737.7	3581.4	3897.7	3924.9	3758.5	3643	3586.5	3950.1	3839.8
CAFS_HM_T_00035881	2590.2	2658.1	2663.7	2539	2664.1	2697.7	2642.5	2736.5	2649.9
CAFS_HM_T_00084561	4049.4	4082.1	4147.2	3865	4036	3926.1	4193.1	3931.4	4018.4
CAFS_HM_T_00060807	1367.4	1373.9	1589.5	1535.3	1489.5	1327.7	1486.3	1490.3	1549.9
CAFS_HM_T_00035168	4356.2	5021.5	4367.4	4617.2	4662.2	5034.1	5184.2	3851.4	5441.1
CAFS_HM_T_00040808	3410.4	3447.8	3431.6	3346.1	3407.6	3316.3	3398.7	3473.7	3472.5
CAFS_HM_T_00077479	4470.2	4600.6	4387.1	4445.5	4327.4	4375.9	4422.9	4374.5	4376.9
CAFS_HM_T_00074024	2344.2	2449.3	3428.5	2150.2	2342.2	2033.9	1889.9	1963.4	1998.3
CAFS_HM_T_00023055	1805.4	1815.6	1850.6	1869.8	1830.7	1973.6	1871.5	1971.3	2050.7
CAFS_HM_T_00003706	3198.8	3279.7	3233.6	3183.6	3287.3	3045.9	3090	3132.2	3161.8
CAFS_HM_T_00065057	3082.9	3035.1	2928	2962.3	3133.6	2909.1	2868.6	3051.5	2905.8
CAFS_HM_T_00013105	4002.1	3748.3	3975.5	3866.3	3763.1	3859.7	3800.4	3839.4	3904.1
CAFS_HM_T_00026905	4513.3	4362.6	4421.5	4383.4	4310.8	4434.9	4082.8	4372.1	4493.6
CAFS_HM_T_00015700	3836.3	3505.1	3776.7	3420.2	3506.2	3534.6	3600.4	3373.5	3569.5
CAFS_HM_T_00091950	2690.9	2588	2820.8	2873	2789.4	2600.2	2646.1	2855.1	2694.9
CAFS_HM_T_00052674	3492.5	4460.3	7899.8	4069.5	3402.8	3577.3	5068.2	4202.7	3578.3
CAFS_HM_T_00054461	2521.4	2389.5	2694.6	2592.2	2502.3	2388.5	2378.4	2742.4	2617.4
CAFS_HM_T_00044586	3125.3	3053	3100.8	3127.2	3092.8	3074.2	3021.8	3063.8	3087.4
CAFS_HM_T_00069052	2720	2698.6	2530.7	2613.9	2748.6	2680.9	2455.9	3042.7	2631.1
CAFS_HM_T_00022859	4221.3	5145.9	3851.7	3845.1	4126	4675.4	4802.1	3909.3	4490.3
CAFS_HM_T_00069151	1246	1218.8	1230.5	1320.6	1483.7	1232.1	1290.9	1437.3	1265.4
CAFS_HM_T_00057886	5349.2	5292.8	5564	5545.1	5549.5	5329.3	5599.7	5570.9	5743.6
CAFS_HM_T_00010640	1064	1052.6	1096.4	1076.1	1126.3	1086.5	1040.4	1140.7	1086.1
CAFS_HM_T_00080339	3550.1	3092.5	3765.9	3712	3399	3112.4	3042.9	3686.1	3341.8
CAFS_HM_T_00054386	3958.3	3672.4	3248.9	3385	3380.9	3509.9	3735.4	3331.2	3310.1
CAFS_HM_T_00024150	4281.1	4371.6	4408.6	4461.1	4540.6	4473.9	4586.1	4743.2	4432.1
CAFS_HM_T_00013218	3354.4	3462.9	3076.5	3016.3	3037.2	3292	3310.8	2909.5	3092.7
CAFS_HM_T_00038801	470.2	406	421.2	432.1	445.4	432.7	435	427.5	441.4
CAFS_HM_T_00071645	4306.3	4486.7	4579.7	4368	4270.9	4317.8	4144.2	4579.2	4527.8
CAFS_HM_T_00024819	3533.4	3721.1	3599.6	3466.8	3408	3903.8	3742.5	3341.9	3582.2
CAFS_HM_T_00046811	3628.6	4064.5	3663.2	3941.8	4206.3	3914.7	3881.4	3922.3	3674.9
CAFS_HM_T_00086333	3574	3530.8	3476.8	3381.5	3212.3	3394.9	3218	3341.8	3399.9
CAFS_HM_T_00064807	548.7	558.7	519.8	577.7	533.4	528.1	535.2	494.3	531
CAFS_HM_T_00040110	3843.4	3594.9	3680	3768.7	3931	3587.2	3936.2	3732	3794.4
CAFS_HM_T_00008455	1523.4	1288.1	1404.3	1456	1476.3	1224.9	1319.1	1436.6	1413.7
CAFS_HM_T_00040458	88.6	91.8	85.6	75.6	80.2	87.2	77.8	79.1	87.8
CAFS_HM_T_00018258	3032.9	2989.5	2971.9	2828.7	2940.7	2943.2	2981.6	2918.3	2946.7
CAFS_HM_T_00010553	5376.7	2368.9	4487.8	3380.4	4767.6	6663.3	3798.6	7922.9	2402.4
CAFS_HM_T_00082867	1441.5	1462.3	1520	1350.8	1330.2	1744.3	1572.1	1377.1	1520.5
CAFS_HM_T_00017543	3653.9	3470.6	3766.2	3786.5	3762.4	3753.4	3658.6	3906.5	3825
CAFS_HM_T_00063839	6191.9	6171.3	6069.1	6453.2	6412.7	5928.4	5949.6	6397.3	6226.3
CAFS_HM_T_00081805	3748.6	3831.3	3782.5	3777.6	3842.9	3363.4	3989.3	3505.6	3622.2
CAFS_HM_T_00083596	433.1	497	458	427	513.7	440.3	537.5	429.8	434.6
CAFS_HM_T_00022652	3469.9	3555.4	3646.1	3267	3778.2	3771.5	3773.6	3742.9	3801.5
CAFS_HM_T_00080803	3191	3183.2	3315.5	3196.2	3271	3372.2	3314.7	3210.4	3339.5
CAFS_HM_T_00071366	1567.3	1642.7	1691.4	1680.5	1635.1	1586.5	1668.9	1685.2	1653.8
CAFS_HM_T_00089312	1648.5	1612.8	1715.5	1742.6	1779.8	1623	1709.9	1773.8	1728.6
CAFS_HM_T_00047035	2698.9	2789.1	2852	2732.4	2672.5	2795	2866.9	2615.1	2759.2
CAFS_HM_T_00053199	760.9	663.7	765.8	783.1	779.9	781.5	780.5	764.3	722.5
CAFS_HM_T_00034491	6539.9	6794.9	6083.1	5078.1	5474.1	6874	7132.9	5273.5	6101.1
CAFS_HM_T_00087652	3745.9	3763.5	3969.1	3873.3	3895.9	3805.9	3785	3957.8	3975.8
CAFS_HM_T_00026816	4638	4439.1	4689.3	4541.8	4491	4630.7	4539.5	4759.3	4697.8
CAFS_HM_T_00026622	4912.1	4670.6	5144.7	5063.6	5244.4	4848.7	4951.8	5382.8	5168
CAFS_HM_T_00003262	3080.9	3000.1	3104.3	3095.6	3310.6	2883.8	3024.7	3225.4	3122.7
CAFS_HM_T_00057816	4299.6	4247.5	4278	4509.2	4484.5	4140.6	4250.4	4530.1	4333.5
CAFS_HM_T_00028541	2109.7	2126	2166.8	2238.6	2189.8	1987	2180.6	2117.2	2134.3
CAFS_HM_T_00046461	3546.5	3542.3	3465.7	3488.7	3662.3	3315.8	3516.5	3369.4	3301.7
CAFS_HM_T_00004443	603.7	603.3	648.6	633.6	595	615.3	593	681.2	614.5
CAFS_HM_T_00063863	574	572.6	543.1	599.9	571.9	579.9	558.7	582.2	583.1
CAFS_HM_T_00027096	2763.9	2711.7	2704	2718.2	2696.7	2701	2632.5	2657.7	2675.5
CAFS_HM_T_00016071	2484.8	2233.5	2645.6	2444.2	2200.1	2322.5	2246.1	2357.3	2451.2
CAFS_HM_T_00058261	4020.3	3765.6	4065	4024.3	4085	3945.8	3879.8	3922.6	3891.6
CAFS_HM_T_00040831	4497.7	4529.1	4648.5	4650.3	4688.5	4591.4	4589.1	4906.5	4422.4
CAFS_HM_T_00019321	1339.7	1794.4	1188	1260.3	1154.4	1173.1	1165.5	1355.5	1258.6
CAFS_HM_T_00056681	1695.1	1667.2	1675.4	1661.4	1624.6	1691.9	1614.1	1819.8	1786.6
CAFS_HM_T_00038172	721.9	784.7	738.3	806.3	777.3	753.9	757.9	741.7	744
CAFS_HM_T_00074421	12239.6	13882.5	11956.2	11186.4	11198.6	14018	13038.5	9692.7	12921.2
CAFS_HM_T_00061120	5451.6	5199.1	4877.5	4891	4962	5320.9	4825.4	5851.9	5230.2
CAFS_HM_T_00038243	2273.8	2135.2	2430.8	2354.6	2337.9	2325.1	2342.9	2968.8	2307.7
CAFS_HM_T_00032486	4156.8	3961.5	4096.1	4132.4	4154.7	3983.5	3965.9	4104.3	4008.5
CAFS_HM_T_00036799	5593.8	5661.1	5291.3	5169.7	5497.2	5267.7	5296	5535.5	5275.5
CAFS_HM_T_00078440	5324.3	4956.3	5225.2	5101.6	5188	5110	5090.8	5345.7	5209.9
CAFS_HM_T_00078779	3208.9	3254.6	3229.1	3342.1	3163.9	3275.1	3284	3329.3	3316
CAFS_HM_T_00076681	2263.7	2813.4	2272	3006.2	2725.3	2233.3	2607.7	2519.7	2714.4
CAFS_HM_T_00043172	1869.7	1924.2	1898.7	1878.6	1895.6	1890.4	1898.5	1917.8	1944
CAFS_HM_T_00018111	937.2	975.3	964.2	970	964.3	947.2	997.6	929.8	994.9
CAFS_HM_T_00055172	7875.5	7686.6	9209.2	7459.9	5872.9	7473.1	6802.5	7287	7271.4
CAFS_HM_T_00032155	3584.9	3616.2	3511.3	3668.9	4256.4	3563.1	3487.7	3407.7	3517.5
CAFS_HM_T_00006976	2799.6	2773.7	2718.2	2728.4	2726.2	2700.5	2734.7	2757.5	2706.8
CAFS_HM_T_00085985	3095.9	3089.3	2908.8	3040.7	3265	2822	3309.8	2794	2867.9
CAFS_HM_T_00055542	1890.4	1632.3	1889.9	1943.4	1795.1	1610.6	1616.3	1829	1800.4
CAFS_HM_T_00007284	610.6	348.8	696.6	603.2	603.4	619.5	649.4	662	548.9
CAFS_HM_T_00061271	1831.9	1923.6	1943.5	2035	1960.5	1904.6	1956.6	2031.3	2013.9
CAFS_HM_T_00090359	4769.5	4570	4727.2	4665.2	4778.9	4558	4810.7	4759.5	4810.6
CAFS_HM_T_00068186	3822	3965.4	3738	3811.8	3835.8	3714.8	3860.4	3827.1	3826.8
CAFS_HM_T_00029017	4812.4	4441.2	5106.7	5045.7	5104.3	4437.2	4586.7	5043.6	4797.6
CAFS_HM_T_00054687	4479.9	4541.6	4499	4355.2	4364.9	4519	4731.5	4419.5	4723.5
CAFS_HM_T_00053004	3805.4	3843.2	3465.9	3775.6	3902.2	4003.8	4024.6	3455.8	3657
CAFS_HM_T_00064350	2462.9	2503.1	2372.5	2248.1	2225.3	2360	2333.3	2124.4	2423.9
CAFS_HM_T_00064735	3962.5	3943.2	4033.7	3686.5	3643.5	4015.7	4144.6	3895	3796.9
CAFS_HM_T_00019700	30.7	26	27.3	31.1	28	31.9	29.5	28	27.2
CAFS_HM_T_00039346	1253.2	1405.7	1041.3	1144.1	1201.1	1036.8	1018.6	1145.9	1183.8
CAFS_HM_T_00006565	1708.2	1717.4	1685.2	1701.1	1707.5	1670	1659.1	1657.4	1693.3
CAFS_HM_T_00014281	3719.9	4115.9	3751.6	3937.2	3814.8	3663.3	3719	3445.8	3707.8
CAFS_HM_T_00001453	4162.3	4509.7	4351	4163.9	4530.7	4351.7	4242.1	4134.9	4493.6
CAFS_HM_T_00063174	3434.6	3467.9	3459.7	3465.9	3425.8	3239.9	3412.6	3354.5	3484.3
CAFS_HM_T_00077372	5330.6	5097.8	5288.1	5467.4	5394.7	5280.9	5030.8	5623.5	5358.3
CAFS_HM_T_00087635	593.2	571.9	549.1	583.8	600.2	575.3	596.7	576.4	538.3
CAFS_HM_T_00013642	4535.4	4763.9	4750.7	4380.1	4430.6	4460.1	4605.7	4238.4	4463.8
CAFS_HM_T_00038915	600.2	552.7	621	606.6	569.9	519.1	544.2	622.5	574.3
CAFS_HM_T_00059277	4880	5348.1	4803.6	4431.8	4560.2	4864.8	4817.1	4896.5	4664
CAFS_HM_T_00067327	1017.6	969.6	984.7	959.2	948	1022.5	968.6	965.8	1000.3
CAFS_HM_T_00009938	4513.1	4762.1	4655.6	4589.2	4449.5	4961.1	4537	4835.2	4860.1
CAFS_HM_T_00076345	3580.1	2986.9	3693.6	3333.1	2848.4	3024.8	3030.6	2998.1	3148
CAFS_HM_T_00056409	4874.5	4835.7	4771.9	4807.6	4788.3	4665	4754.6	4784.7	4848.7
CAFS_HM_T_00073419	3163.2	3157.2	2880.4	3084.7	3283.5	2826.6	3215.2	3016.1	3059.7
CAFS_HM_T_00031771	2634.2	2513.7	2598.5	2640.2	2699.9	2617	2565.2	2748.7	2605.7
CAFS_HM_T_00021376	3809.4	3715.9	3723.8	3660.7	3827.7	4047.3	3634.2	3698.9	3819.8
CAFS_HM_T_00065779	3237.9	3298.8	3049.6	3029.4	3070.8	3258.6	3247.7	3188.6	3078.3
CAFS_HM_T_00054004	4402.1	4702.9	4419.9	4830.1	4755.4	4540.4	4655.9	4791.5	4575.8
CAFS_HM_T_00025228	3558.2	3283.8	3428.2	3399.8	3463.7	3244.9	3505.4	3409.2	3332.1
CAFS_HM_T_00052679	4972.1	4944.5	4971.6	5031.7	4919	5108.8	4934.2	4671.1	4802.5
CAFS_HM_T_00075635	3148.7	3091.7	3017.3	3040.5	2986.1	3148.3	3036.9	3125	3117.8
CAFS_HM_T_00029106	6549.3	6677.8	6980.1	7013.6	6366.5	6185.9	6304.8	6672.9	6705.9
CAFS_HM_T_00074198	1526.9	1510.1	1581.9	1604.2	1542.6	1438.1	1509.5	1577.5	1564.8
CAFS_HM_T_00051558	3309.9	3495.3	3054.8	3282.5	3317.3	3322.2	3415.1	3201.7	3257.7
CAFS_HM_T_00091897	2831.9	3044.5	2920.8	2879	2940.7	3039.8	2972.9	2976.7	2917.4
CAFS_HM_T_00053842	4487.6	4065.6	4439.1	4080.8	4520.8	4817.7	4474.3	4377	5368.8
CAFS_HM_T_00036812	3036.9	2655.1	3246.3	3093.1	2940.1	3053.2	2641.9	3297.8	2837.7
CAFS_HM_T_00062337	2082.8	2247.8	2274	2141.7	2067.9	2239.6	2211.7	2324.1	2281.5
CAFS_HM_T_00042270	4760	4562.6	4629.6	4677.9	4608.8	4365.7	4486.6	4658.7	4576.7
CAFS_HM_T_00017218	1487	1497.1	1406.5	1430.8	1463.7	1406.6	1513.6	1372.8	1318
CAFS_HM_T_00062320	1592.1	1456	1408.7	1229.3	1118.3	1346.3	1355.3	1141.2	1320
CAFS_HM_T_00015738	4473.7	4483.5	4637.7	4258	4317.9	4833.5	4744.3	4289.7	4567.7
CAFS_HM_T_00007003	5385.6	5405.2	4717.5	5163.2	5017.7	5040.3	4822	4742.2	5216.2
CAFS_HM_T_00059643	3541.9	3612.2	3572.8	3547.3	3457.6	3487.4	3493.8	3315.7	3351.6
CAFS_HM_T_00075410	1507.8	1410	1562.3	1471.4	1553.6	1345.4	1367.7	1610.5	1440.8
CAFS_HM_T_00076349	3596.3	3537	3661.3	3707.1	3767.3	3572.6	3643.3	3703.1	3675.4
CAFS_HM_T_00069480	3513	3235.3	3684.7	3616.4	3584.7	3394.2	3296.5	3693.9	3476.1
CAFS_HM_T_00034469	1325.1	1420.2	1434.3	1301.5	1327.3	1421.7	1408.1	1376.3	1466.8
CAFS_HM_T_00011835	4170.6	4381.8	3944.9	4305.8	4654	4279.2	4117.3	4393.3	4486.2
CAFS_HM_T_00073950	2743.4	2609.7	2669.8	2780.2	2781.4	2521.8	2642.7	2791.2	2661.5
CAFS_HM_T_00061152	1692.6	1793.3	1736	1656.7	1677.9	1748.6	1871.5	1641.9	1727.2
CAFS_HM_T_00038065	5734.3	6890.1	5677.7	7274.3	7203.8	4785	6164.9	5802.7	6667.2
CAFS_HM_T_00069009	4749.5	5070.8	4767.1	4887	4938.1	4742.2	4812.9	4759.2	5070.9
CAFS_HM_T_00091103	4580.8	4536.1	4633.8	4577.8	4528.8	4523.1	4568.6	4368.1	4536.8
CAFS_HM_T_00019174	3671.5	3309.9	2955.4	3244.6	3198.2	3318.4	3081.3	3190.1	3057.2
CAFS_HM_T_00069174	4979.4	4767	4636.5	5029.1	5767.1	4433.3	4843.2	5352.6	5111.6
CAFS_HM_T_00006369	576.5	550.5	608.4	531.9	576.1	611.9	554.8	576.5	572
CAFS_HM_T_00026214	3824	3634.6	3810.5	3876.5	3919.6	3936.3	3824.4	4343.1	4067.4
CAFS_HM_T_00064019	2965.8	2670.3	2884.8	3033	2955.9	2758.1	2647	3116.6	2835.9
CAFS_HM_T_00054305	2295.1	2205	2371.6	2263.1	2459.5	2239.5	2330.5	2284.5	2253.6
CAFS_HM_T_00064181	3226.3	3274.8	3287.1	3165.3	3120.3	3241	3214	3094.4	3173.3
CAFS_HM_T_00031689	4243.8	4110.1	4374	4506.4	4418.5	4212	4195.7	4503	4397.6
CAFS_HM_T_00008491	3009.7	2861.1	3024.5	2871.7	2943.2	3094.9	3030.6	2798	3128.6
CAFS_HM_T_00014560	2099.7	1918.7	2066.6	2209.6	2079.4	1965.2	1811.5	2110.2	1939.7
CAFS_HM_T_00072640	4317.7	4116.7	4123.6	4114.2	4260.3	4208.7	4375.5	4389.6	4350
CAFS_HM_T_00047022	3298.4	4049.8	3124.4	4371.4	4159.6	3448.9	3795	3711.5	3230.1
CAFS_HM_T_00038878	7409.3	6836.8	7497.6	7233.5	8170.2	7432.3	7690	8321.5	7804.6
CAFS_HM_T_00008018	1725.9	1717	1812.9	1889.1	1994.5	1643.8	1897.6	1913.9	1928.6
CAFS_HM_T_00074163	2547.1	2698.7	2755.1	2728.2	2654.9	2723.8	2732.4	2482.4	2670.1
CAFS_HM_T_00014129	3153.6	3099.1	3221.3	2743.2	2674.6	3086.9	3023.1	3015.9	3011.9
CAFS_HM_T_00018725	4973.9	5084.9	5077.6	4960.6	4986.8	4857.9	4859.7	5133.1	5045.7
CAFS_HM_T_00083431	3738.9	3498.6	3468	3654.8	3724.5	3218.7	3375.9	3767	3571.4
CAFS_HM_T_00074340	222.7	164.7	171.3	186.7	177.4	191.6	161.7	282.8	173.1
CAFS_HM_T_00019304	4160.6	3840.8	3870.2	3883.2	3986.5	3767.1	3777.1	4080.6	3949
CAFS_HM_T_00063425	3791.4	3752.8	3758.9	3756.4	3833.7	3742.3	3729.9	3781.5	3664.3
CAFS_HM_T_00015784	3878.3	4429.4	3681.5	4538.4	4399	3633	5995.1	3908.2	3755.8
CAFS_HM_T_00086973	2973.4	2854.3	3105.8	3107.9	3097	3479.9	2963.1	3629.8	2915.4
CAFS_HM_T_00040188	2273.1	2487.4	2279.1	2262.1	2361.4	2373.5	2314.3	2131.9	2243.5
CAFS_HM_T_00064723	3226.5	3503.5	3115.7	3049	3463.3	3287.5	3408.5	3038.5	3306.5
CAFS_HM_T_00045652	2443.7	2586.9	2496.3	2325.8	2309.8	2626.4	2666.5	2434.6	2659.2
CAFS_HM_T_00042247	3611.8	3839	3433.2	3445.1	3488	3540.6	3535	3590.6	3600.3
CAFS_HM_T_00055671	546.1	499.2	509.2	538.9	514.3	473.1	493.2	518.9	476.9
CAFS_HM_T_00025124	3179.6	3191.7	3303.3	3275.8	3285.7	3315.5	3205.1	3235.9	3220.8
CAFS_HM_T_00043559	2766.3	2975.3	2831	2661.9	2495.5	2732.6	2732.3	2468	2558.3
CAFS_HM_T_00013675	3767.8	3550.9	3781.1	3744	3760.9	3684.3	3744.9	3898.6	3993.2
CAFS_HM_T_00014240	5008.3	4915.1	5139	5207.8	5073.9	4977.3	5025.7	5177.8	4909.4
CAFS_HM_T_00007163	2054.2	2160.8	1684.3	1998	1990.3	1874.9	2081.5	2009.3	2038.4
CAFS_HM_T_00053735	3793.4	3589.6	3908.3	3851.1	3990	3675.6	3843	3958	3722.1
CAFS_HM_T_00054643	3290	3099.5	3227.6	3223.8	3319.1	3176.3	3311.2	3179.8	3014.4
CAFS_HM_T_00057141	3386.6	3767.4	3380.2	3588.3	3740.9	3499.7	3626.2	3668.5	3597.8
CAFS_HM_T_00053448	2088	2221.8	2036.4	2106	2170.3	2103.1	2123.3	2086.7	2030.1
CAFS_HM_T_00067354	2632.2	2622.6	2748.7	2612.7	2621.1	2542.8	2514.7	2614.9	2585.8
CAFS_HM_T_00077810	2920	2908	2725.9	2862.7	2781.4	2688.3	2727.4	2989.3	2854.5
CAFS_HM_T_00036435	1279.1	1351.6	1293.9	1374.6	1408.2	1217.5	1231.7	1338.9	1329.7
CAFS_HM_T_00008502	3664.1	3576.1	4163.8	3818.9	3493	3513.8	3434.4	3780.3	3778.5
CAFS_HM_T_00088559	2196.7	2329.1	2277.1	2260.6	2261.1	2273.3	2220.4	2313.2	2381.6
CAFS_HM_T_00014913	1354	1422.1	1347.8	1317.5	1326.3	1350	1340.6	1326.5	1302.3
CAFS_HM_T_00019520	816.7	855.7	818.6	827.4	863.3	829.2	830.3	836.7	816.1
CAFS_HM_T_00091706	4136.4	3931.1	4091	4144.6	4160.4	3993.4	4090.3	4351.5	4030.3
CAFS_HM_T_00062902	3037.8	3128.2	3130.1	3058.1	3271.2	3197.9	3168.4	3157.5	3018.1
CAFS_HM_T_00040046	3941	3685.1	3845.4	3903.6	3784	3817.6	3910	3803.7	3855.9
CAFS_HM_T_00068955	3119.3	2908.4	3324.9	2960.5	2615.7	3038	2944.3	2829	3079.9
CAFS_HM_T_00077471	2492.8	2582.6	2857.2	2488.5	2208.1	2663.7	2311.7	2453.3	2351.1
CAFS_HM_T_00089946	987.2	925.8	1174	1081.1	1036.9	947.8	937.2	1078.2	1016.2
CAFS_HM_T_00021595	947.4	871.6	913.4	946.3	975.2	860.5	865.7	947	949.4
CAFS_HM_T_00074967	2834.2	2854.8	2741.5	2852.8	2835.7	2732.8	2847.4	2722.5	2706.4
CAFS_HM_T_00051624	308.9	300.6	295.5	324.8	331.4	278.8	317.8	318.8	307.3
CAFS_HM_T_00025434	3582.4	3651.6	3546	3602.2	3736.1	3353.2	3583.4	3447.3	3483.8
CAFS_HM_T_00079714	1797	1675.5	1821	1771.2	1772.1	1776.8	1720.8	1841.6	1776.7
CAFS_HM_T_00086407	2584.7	2490.2	2477.3	2591.2	2756.8	2426.8	2456.9	2603.5	2685.5
CAFS_HM_T_00075450	3133.8	3228.4	3198.2	3114.7	3065.3	3408.2	3221.5	3119.6	3331
CAFS_HM_T_00061160	4515	4353	4560.3	4503.2	4497.2	4320.1	4346.4	4533.1	4458.8
CAFS_HM_T_00054414	4433.7	4066.5	4281.4	4126.8	4541.4	4188.1	4295.7	4352.4	4376.3
CAFS_HM_T_00070596	2815.2	2826.7	2872.6	2760.8	2814.4	2696.6	2765	2821	2775.1
CAFS_HM_T_00081090	2808.8	3015.8	2743.5	2721.5	3144.5	2991.2	2833.8	2926.6	2987.3
CAFS_HM_T_00068991	2866	2670.3	2952.2	2833.9	2735.1	2845.4	2636.9	2929.1	2777.3
CAFS_HM_T_00078319	3014.6	2786.9	2813.8	2730.6	2627.5	2797.7	3037.6	2707.4	2671.7
CAFS_HM_T_00038614	4442.5	4281.3	4652.4	4414.7	4382.7	4335.7	4572.1	4492.9	4692.1
CAFS_HM_T_00092375	860.8	862.8	760.8	865.4	903.3	860.8	838.9	899.8	891.9
CAFS_HM_T_00034394	132.8	126.2	119.8	133.6	114.9	118.7	88.6	133.7	123.7
CAFS_HM_T_00008576	2682.4	2827.4	2640.9	3126.1	3314.2	2635.2	2917.9	3036.3	2757.3
CAFS_HM_T_00043659	1578.9	1536.9	1613.3	1626.4	1646.5	1629.1	1575.2	1687.6	1633.3
CAFS_HM_T_00005959	5682.1	5649.8	5899.2	5534.3	5705.4	6248.4	6050.3	5604.1	5873
CAFS_HM_T_00053043	3984.2	4010	3794.1	3633	4058.2	5105.3	5066.9	3475.8	4346.1
CAFS_HM_T_00003405	2048.6	2101.2	1969	1979.7	2166	2001.5	1896.4	2214.3	2082.8
CAFS_HM_T_00055269	5737.5	6016.9	5662.6	5339.8	5260.1	6021	5752.3	5222.5	5669.1
CAFS_HM_T_00024561	4119.9	4055.7	3893.5	3889.1	3709.3	3905.6	3823.6	4018.7	4090
CAFS_HM_T_00011756	4475.9	4343	4587.2	4771.9	4542.6	4438.9	4493.1	4769.4	4641.9
CAFS_HM_T_00041635	2285.6	2126.5	2301.2	2257.5	2335.6	2143.3	2224.5	2252.7	2223
CAFS_HM_T_00072430	1964.3	1896.5	1932.7	1925.2	1898	1765	1861.8	1970.1	1902.5
CAFS_HM_T_00017802	5750.1	5870.6	5898.1	5814.4	5738.4	5819	5698.1	5945.4	6000.9
CAFS_HM_T_00059461	3442.7	3348.6	3726	3251.7	3331.7	3769.6	3567.9	3295.3	3229.5
CAFS_HM_T_00016084	5866.7	5563.7	6073.1	5692.5	5779.2	5608.4	5677.4	5889.9	5795.2
CAFS_HM_T_00091755	2300.2	2502.8	2360.3	2592.4	2850.7	2439.8	2489.1	2773.2	2569.9
CAFS_HM_T_00078396	717.1	612.1	676.9	676.9	715.3	663.3	658.6	693.9	711.2
CAFS_HM_T_00078069	2971.2	2622.7	3201.5	3026.1	2972	3023.6	2756.3	3111.5	2999.9
CAFS_HM_T_00028403	261	260	266.5	263.9	250.2	241.3	255.4	249.3	246.6
CAFS_HM_T_00029332	3200.7	3335.4	3372.8	3273.4	3187.9	3335.9	3339.5	3270.8	3179.6
CAFS_HM_T_00053960	1225.3	1101.8	1284.7	1302.5	1276.1	1157.5	1081.4	1345.9	1278
CAFS_HM_T_00084563	4285.3	4723.5	4515.9	4652	4586.6	5088.8	5044.1	4736.3	4884.9
CAFS_HM_T_00003386	1512.4	1454.2	1543.9	1464	1567	1414.7	1451.1	1659.5	1429.5
CAFS_HM_T_00056573	3942.3	3809.5	4015.2	4069.8	4056.4	4010.9	4001.8	4103.6	4063.3
CAFS_HM_T_00029377	2407.5	2525.1	2408.3	2312	2471.8	2409.1	2531.4	2452.6	2489.4
CAFS_HM_T_00029894	1154.9	1053.7	1148.6	1193.1	1170.4	1022	1075.2	1228.7	1214.7
CAFS_HM_T_00004988	3145.8	3180.2	3148.8	3290.3	3490.6	3039.5	3388.1	3332	3211.4
CAFS_HM_T_00005460	2766.6	2829.1	2710.3	2856.3	2962.9	2688.8	2749	2977.8	2882.5
CAFS_HM_T_00017306	3410.2	3454.6	3287	3432.5	3497	3272.5	3397.9	3233.1	3254.8
CAFS_HM_T_00037941	4829	5106.1	4904.1	4652.8	4712.7	4922.2	4947.7	4426.7	4627.3
CAFS_HM_T_00084827	2005.1	1943.6	2055.2	1965.8	2025.2	1858.2	1939.4	1996.1	1940.3
CAFS_HM_T_00067536	3131.7	3198.4	3551.3	3709.2	3683.7	3381.1	3572.6	3616.5	3623.6
CAFS_HM_T_00066767	1231.6	1083	1217.4	1250.2	1252.6	1232.4	1138.1	1181.1	1181.2
CAFS_HM_T_00015174	2282.2	2178.7	2028.7	2244.8	2249.7	2042.2	2110.5	2204.9	2167.7
CAFS_HM_T_00020544	568.7	577.5	520.8	528.6	562.2	531.3	505.4	548	549.8
CAFS_HM_T_00004602	4326.2	4019.1	4194.1	4260.6	4221	3957.8	4310.7	4496.4	4396.6
CAFS_HM_T_00039079	2363.5	2181	2299.3	2373.5	2327.2	2156.7	2085.3	2507.8	2252.4
CAFS_HM_T_00002793	323.9	308.9	353	357.8	338.4	325.9	314.9	379.1	344.6
CAFS_HM_T_00017820	1118.6	1165.2	1002.9	1293.6	1319.7	1048.6	1584.1	1103	1068.3
CAFS_HM_T_00054850	2251.4	1596.1	2552.7	2258.5	2183.3	1984.8	2301.6	2214.4	2690.9
CAFS_HM_T_00050307	4523.9	4980.2	4255.4	4654.2	5099	4297.3	4773.8	4701.7	4890.6
CAFS_HM_T_00054722	299	115.8	307.9	275.3	250.3	293.2	301.8	301.4	241.6
CAFS_HM_T_00078090	3482.9	3495.7	3466.4	3610.1	3577.4	3426.4	3300.5	3614.7	3502.3
CAFS_HM_T_00000153	2458.3	2343.6	2496.1	2439.8	2572.5	2291.5	2371.7	2601.4	2533.1
CAFS_HM_T_00080561	3640	4043.5	3853.2	3959.7	3512.4	3597.9	3403.4	3805.6	3847.2
CAFS_HM_T_00050108	5678.2	5708.9	5876.4	5448.3	5451.9	5487.3	5293.3	5755.5	5455.5
CAFS_HM_T_00000557	1183.5	1212.2	1349.1	1210.2	1140.5	1188.6	1177.8	1253.9	1222.3
CAFS_HM_T_00021322	3777.3	3833	4421.2	3507.7	3821.1	3792.5	3679.4	3851	3773.1
CAFS_HM_T_00088131	3395.2	3155.2	3257	3364.2	3434	3092.3	3220.8	3296.3	3261.6
CAFS_HM_T_00021677	2239.5	2479.8	2043.8	2089.1	2310.4	2369.2	2353.5	2117.7	2341.9
CAFS_HM_T_00012213	3057.2	3135.6	3023.2	2966.2	3034.9	2871	3243.2	2865.7	3065.3
CAFS_HM_T_00015429	3493.3	3269.7	3355.5	3356.9	3485.1	3253.5	3390	3494.9	3360.9
CAFS_HM_T_00043452	1596.9	1587.9	1524.8	1554.7	1461.7	1494.5	1510.1	1463.2	1532.3
CAFS_HM_T_00060161	5285.7	4919.6	5506.5	5412.4	5438.2	5012.9	4928.6	5819.3	5435
CAFS_HM_T_00058421	3392.3	2775.7	3905.3	3754.5	3262.9	3028.3	3048.3	3820.1	3346.2
CAFS_HM_T_00051670	4002	4287.6	3920.9	4406.6	5153.4	3952.5	5483.7	4369.8	4167.8
CAFS_HM_T_00014504	2019.1	1757.2	2205.6	2238.3	2021.4	1786.9	1872.6	2085	2143.8
CAFS_HM_T_00009327	1913.1	1874.8	1863.1	1741.3	1828.4	1970.3	1975.3	1736.7	1948.5
CAFS_HM_T_00081686	2498.9	2460.1	2156	2122.6	2111.6	2213.9	2215.6	2092.2	2178.2
CAFS_HM_T_00036966	3378.3	3776.5	3026.7	2904.3	3039.7	3855.3	3388.4	2798.7	2964.9
CAFS_HM_T_00041894	2834.9	2750.6	2724.3	2864.8	2859.6	2784.1	2834.4	2884.9	2819
CAFS_HM_T_00073202	3117.3	3016.2	2788.5	2961.6	2708.2	3029.8	2733.2	2734.3	2869.7
CAFS_HM_T_00026530	7823.1	8365.7	7721.9	7610.4	7135.8	8183.1	7836.8	7319.7	7458.6
CAFS_HM_T_00052195	4733.2	4467.4	5188.1	4818.1	4146.2	4811.8	4459	4833	5091.3
CAFS_HM_T_00080203	2554.6	2778.5	2627.6	2654.7	2548.6	2895.2	2707.5	2618.4	2631
CAFS_HM_T_00008548	672	637.9	661.9	686.2	702.8	678.5	681	719.4	717.8
CAFS_HM_T_00041072	3994.8	3829.3	3944.9	4106.4	4166.6	3809.1	4307.7	4059.5	4017.7
CAFS_HM_T_00057859	1515.6	1503.7	1509	1512.8	1502.4	1512	1493.4	1419.4	1479.4
CAFS_HM_T_00088066	4102	4163	4193.7	4105.3	3922.9	3993.9	4159.6	4299.2	4325.2
CAFS_HM_T_00078787	2468.9	2383.7	2485.4	2586.5	2646	2381.8	2576.7	2638.5	2555.8
CAFS_HM_T_00087477	841.8	892.1	809.4	868.6	871.6	795.2	867.4	833.8	845.6
CAFS_HM_T_00070546	422.6	390	450	432	415.9	404.1	429.1	426.9	435.5
CAFS_HM_T_00008623	3030.7	3211.4	3030.7	3651.6	3998.1	3036	3434.7	3068.3	3169
CAFS_HM_T_00043899	3151.3	2926.3	3159.6	3134.1	2938.2	2914.5	2855.1	3105	3156
CAFS_HM_T_00064882	4797.5	4710.6	4259.2	4384.7	4247.7	4563	4455	4522.4	4569.8
CAFS_HM_T_00033864	2750.9	2665.6	2654	2658.5	2787.1	2600.9	2513.1	2691.2	2756.6
CAFS_HM_T_00014015	1547.7	1653.2	1727.4	2932.4	1823	1824.7	1852.2	2452.8	1791.8
CAFS_HM_T_00051731	2522.5	2380.2	2489.6	2450	2429.6	2481.7	2338.6	2517.5	2460.5
CAFS_HM_T_00081432	3543.8	3782.2	3435.7	3468.6	3517.6	3689.4	3634.3	3525.1	3830.8
CAFS_HM_T_00008022	2567.1	2519.2	2303.4	2541.5	2479	2518.5	2461	2538.9	2425.4
CAFS_HM_T_00031650	4105	3822.5	4153	4429.8	4158.5	4079.9	4308	4323	4273.3
CAFS_HM_T_00034176	3064.8	3168.5	3175.3	3092.6	3124.1	3589.1	3248.7	3075.7	3232.3
CAFS_HM_T_00018827	3727.5	3762.6	3563	3826.9	3873.4	3771.2	3826.7	4001.1	3941.7
CAFS_HM_T_00011215	5640.9	5446.3	5506.9	5439.3	5429.8	5384	5232.9	5604.9	5624.8
CAFS_HM_T_00011477	2400.5	2604.8	2443.1	2642.3	2796	2460	2432	2827.5	2704.4
CAFS_HM_T_00020517	2726.4	2674.1	2781.2	2723.7	2812.3	2761.5	2687.2	2821.3	2792.8
CAFS_HM_T_00048033	3337.9	3513.5	3152.7	3216.7	3305.9	3317.3	3176.8	3245.5	3253.1
CAFS_HM_T_00062201	3901.4	3487.1	4087.9	4008.6	3886.7	3707.7	3614.9	4250.8	3947.4
CAFS_HM_T_00038417	3533.3	3488.6	3396.5	3295.2	3370.6	3268.7	3420.3	3334.4	3354.6
CAFS_HM_T_00010215	3000.2	2923	3108.6	3155.2	3052	2874.5	2929.3	3101.7	2988.6
CAFS_HM_T_00009202	1520.2	1450.5	1513.6	1505.6	1521.2	1380	1381.4	1561	1405.3
CAFS_HM_T_00004653	2738.6	2779.1	2778.9	2779.7	2806.2	2716.9	2752.8	2679	2823
CAFS_HM_T_00054197	2111.1	1905.2	2010.1	2083.1	2261.3	2035	2119.1	2279.3	2085.3
CAFS_HM_T_00044293	3933.6	4078.3	4015	4097.1	3962.8	3934.7	3864	3846.1	3776.9
CAFS_HM_T_00065796	514.2	478	531.8	567.4	520.7	439.4	491.4	568.8	525.6
CAFS_HM_T_00043664	1658.5	1592	1670.2	1733.2	1723.4	1753.1	1692.3	1782.1	1725
CAFS_HM_T_00035889	2105.7	2028.4	2094.7	2331.8	2478.2	2045.2	2125.1	2372.4	2178.3
CAFS_HM_T_00020070	8129.2	7771.9	8045	7638.1	7847.4	7481	7437.6	8105.8	7575.3
CAFS_HM_T_00039199	9218.8	8946.2	11337.6	9084.1	8679.8	9171.5	9600.7	10083.3	8043.1
CAFS_HM_T_00032818	4638.3	4350.7	4599.1	4507	4497.2	4455.1	3476.5	4498.3	4541.6
CAFS_HM_T_00086794	3540.4	3585.6	3300.8	3215.3	3328	3551.3	3524.5	3257	3431
CAFS_HM_T_00027839	1109.1	1211.3	1165.7	1177.4	1178.3	1226	1183.3	1146.9	1183.1
CAFS_HM_T_00020202	2823.9	2789	2985.2	2866.5	2809.6	2945.4	2874.7	2834.9	2942.2
CAFS_HM_T_00020287	158.8	162.3	164.2	169.9	154.3	147.2	163.9	193.4	182
CAFS_HM_T_00060704	2198.7	2254.2	2117.5	2186	1979.8	2015.9	2095.2	1946.9	2003
CAFS_HM_T_00075158	4472.1	4031.6	4294.5	4354.9	4722.2	4123.9	4008.7	4417.6	4337.9
CAFS_HM_T_00079342	1560.5	1548	1601.3	1652.9	1702.3	1624.7	1635.1	1668.7	1629.5
CAFS_HM_T_00021942	4792.2	4615	4569.8	4507.8	4578.9	4372.3	4674.6	4319.6	4434.9
CAFS_HM_T_00089762	3707	3639.9	3688.2	3524.3	3764.4	3585.8	3699.5	3713.1	3778.4
CAFS_HM_T_00060098	1181	1093.9	1096.2	1091.2	1101.2	1202.3	1138.6	1248.1	1139.3
CAFS_HM_T_00008931	3088.5	3290.7	2885.3	2869.7	2914.5	3014.6	3097.8	2890.2	2995.8
CAFS_HM_T_00031581	3453.7	3369.6	3460.2	3488.1	3724.3	3362.6	3542.9	3264.8	3355.4
CAFS_HM_T_00074845	3591	3291.6	3393.1	2997.5	3382	3584.3	3615.8	3430.9	3524.7
CAFS_HM_T_00025198	3998.9	3537.5	4367.7	4152.5	3844	3513.6	3668	4191.7	3835.2
CAFS_HM_T_00037811	2912.8	2972.1	2805.1	2995.9	3035.6	3178.9	2932.5	3129.2	3157
CAFS_HM_T_00089324	4097.9	4160.6	4034	3988.4	4070.6	4327.1	4110.2	3972.2	4267.5
CAFS_HM_T_00082869	825.8	830.6	811.9	814.4	832.6	818	784.6	820	808.7
CAFS_HM_T_00049316	4146	4033.5	4208.2	4198.7	4283.7	3973.5	3895.6	4443	4232.8
CAFS_HM_T_00078107	3914.2	3527.9	3809	3731.3	4725.7	4185.9	4284.1	4093.7	3807.4
CAFS_HM_T_00017050	3113	3118.2	3095	3046.2	3048.2	2889.8	3125	2822.4	2734.4
CAFS_HM_T_00073258	2943	2779.2	2869.1	2792.1	2900.2	2706.8	2588.2	2898.3	2821.3
CAFS_HM_T_00075825	1001	955.4	988.7	897.6	882.6	1038.5	935	983.6	980.9
CAFS_HM_T_00070925	1512.6	1558.8	1561.3	1564.8	1648.5	1558.3	1756.8	1601.7	1564.7
CAFS_HM_T_00057684	5114.1	4558	5081.6	4951.9	4996.9	4616.8	4949.4	5041.7	4879.8
CAFS_HM_T_00077283	2690.8	2639.2	2381.9	2638.9	2683	2716.5	2496.6	2768.7	2698
CAFS_HM_T_00004769	952	1025.2	960.4	987.7	1043.7	951.8	1003.3	1034.2	1115.9
CAFS_HM_T_00034413	2687	2205.3	2746.6	2794	3121.5	2094.5	2588.1	2041.5	2021.6
CAFS_HM_T_00015652	983.5	958.1	987.3	974.2	1018.8	991.7	1045.6	991.6	981.6
CAFS_HM_T_00007756	3292.9	3944.2	3973.1	3191.1	2590.5	3930	3614.1	3077.4	3863.8
CAFS_HM_T_00091137	3604.9	3453.1	3678.4	3706.2	3644.3	3642.9	3375.2	3777.8	3717.4
CAFS_HM_T_00009337	1352.8	1285.4	1299	1264.9	1293.5	1337.3	1322.4	1227	1262.8
CAFS_HM_T_00026419	3633	3367.1	3493.5	3425.2	3413.4	3407.6	3100.3	4030	3300.8
CAFS_HM_T_00060239	2675.2	2433.7	2485.6	2561.6	2687.3	2497.9	2565.2	2570.8	2578.2
CAFS_HM_T_00079062	1823.1	1777.8	1873.4	1807.8	1844.4	1852.9	1813.9	1912.2	1824.1
CAFS_HM_T_00077413	657.3	702.9	657.6	684.3	681.8	719.7	727.9	707.8	687.7
CAFS_HM_T_00046881	4158.3	3892.8	3766.8	4045	4191.9	3748.2	3843.5	4131.3	3972.6
CAFS_HM_T_00081168	3015	3094.4	2820.3	2996.5	3265.1	2920.5	3088.7	2985	2870.2
CAFS_HM_T_00016842	938.9	918.1	840.6	1007.5	1050.8	842.7	915.5	974.2	900.3
CAFS_HM_T_00076330	530.5	481.6	527.8	530.5	501.9	424.3	495.2	494.6	537.8
CAFS_HM_T_00013221	600.7	625.8	607.1	662.8	665	625.7	603.9	623.5	603.2
CAFS_HM_T_00039641	1862.2	1836.4	2687.6	1843.7	1972.8	1787.3	1895.2	1879.4	1828.2
CAFS_HM_T_00043756	3832.7	3685.5	3785.6	3582	3720.8	3583.8	3565.6	3548.3	3584.8
CAFS_HM_T_00029282	2882.7	2841.2	2847.2	2825.5	2856	2707.4	2784.4	2837.1	2908.4
CAFS_HM_T_00073332	3493.5	3521.5	3500.1	3322.5	3439.4	3279.7	3304.2	3287.8	3382
CAFS_HM_T_00018255	2315.3	2363.3	2069.1	2234.8	2496.3	2324.6	2253.9	2501.9	2223.3
CAFS_HM_T_00063030	3834.2	3843.4	3851.9	3710.8	3642.6	3754.9	3789.7	3699.9	3809
CAFS_HM_T_00034397	3587.8	3408.3	3421.4	3771.4	3668.7	3409.9	3377.3	3769	3478.1
CAFS_HM_T_00021922	3076.8	3986.4	3206.1	3135.4	2404.5	2836.7	2671.7	2840.1	2252.7
CAFS_HM_T_00071989	159.2	184.8	153.5	175.7	180.9	139.4	181.3	167.1	194.3
CAFS_HM_T_00042199	1689	1686.4	1609.3	1579.1	1603.4	1717.4	1642.3	1733.8	1665.3
CAFS_HM_T_00013213	4138.4	4082.7	4191.5	4144.8	4182.1	3917	4068.9	4228.6	4141.5
CAFS_HM_T_00055945	3381.6	3272.8	3167.7	3258.4	3293	3353.2	3196.2	3597.8	3536
CAFS_HM_T_00004792	597.2	617.2	611.2	607.1	630.4	630	621.8	608.8	593.4
CAFS_HM_T_00024974	3343.6	3251.4	3521.5	3332.5	3374.5	3366.1	3241	3726.1	3402
CAFS_HM_T_00009342	2831.1	2743.8	2773.3	2767.8	3001.5	2675.5	2682.5	2787.6	2600
CAFS_HM_T_00064208	2936.1	2955.9	3119.6	2979.1	2873.3	3058.2	2948	3022.4	2928.4
CAFS_HM_T_00048834	3270	3224.6	3290.3	3336.1	3403.1	3189.1	3340	3338.6	3311.4
CAFS_HM_T_00037293	2048.4	1995.6	2085	2152.5	2163.9	2079	2030.1	2133.9	2141.9
CAFS_HM_T_00076677	1860	1819	1809	1846.6	1837.4	1883.9	1903.7	1754.2	1926.5
CAFS_HM_T_00011356	4330.5	4105.1	4556.5	4269.7	4355.5	4265.3	4520.5	4781.2	4586.4
CAFS_HM_T_00042870	190.6	212.6	210.8	201.8	214.6	201.2	209.9	217.7	226.3
CAFS_HM_T_00031932	3784.5	3589.6	3689.1	3627.2	3961.5	3483.2	3722	3831.9	3800.9
CAFS_HM_T_00053128	157.2	177.3	191	220.2	216.6	161	220.2	201.2	170
CAFS_HM_T_00022101	4119.5	4007.2	4256.9	3733.2	3661	3838.7	3837.9	3566.4	3832.6
CAFS_HM_T_00033605	3961.8	3969	3912.1	3948	3750.3	3616.2	3939.1	3640.9	3730.2
CAFS_HM_T_00083083	3265.7	3346.8	3383.7	3395.9	3429	3329	3276.1	3531.2	3365.9
CAFS_HM_T_00084241	3410.5	3384.7	3161.1	2935.2	3092.8	3012.8	3360.5	3000.9	3157.6
CAFS_HM_T_00068690	2391.5	2393.6	2437.8	2395.3	2446.2	2226.1	2297.3	2226.8	2308.2
CAFS_HM_T_00010248	3060.8	2973.8	3117.9	3096.7	3196.1	2986.5	3121.3	3072.4	3255.1
CAFS_HM_T_00045017	2580.7	2592.2	2611.9	2764.8	2885.1	2638.6	2819.2	2675	2923.7
CAFS_HM_T_00044165	2775	2618	2636.4	2975.8	2857	2615.8	2582.6	2951.7	2731.8
CAFS_HM_T_00005119	3726.7	3531.4	3534.2	3777.7	3626.4	3432	3385.1	3749.7	3476
CAFS_HM_T_00069991	3503.9	3220.7	3602	3613.2	3533.9	3421.6	3318.5	3715.3	3459.6
CAFS_HM_T_00076393	4486.3	4270.3	4426.3	4159.6	4527.8	4287.3	4425.3	4388.4	4213.8
CAFS_HM_T_00069710	4642.9	4437	4788.1	4695.4	4664.7	4525.4	4622.9	4806.4	4646.8
CAFS_HM_T_00075936	2685.3	2720.6	2876.9	2623.6	2654.2	2864.6	2796.9	2681.2	2730.4
CAFS_HM_T_00029352	2605.2	2469.1	2621	2662.6	2616.3	2532.9	2494.8	2688.4	2684.2
CAFS_HM_T_00064083	2579	2522.2	2487.4	2635.4	2572.6	2423.3	2417	2627.6	2501.1
CAFS_HM_T_00089903	874.1	817.9	881.2	832.3	829.4	831.4	840	878.7	811.1
CAFS_HM_T_00070057	1570.4	1542.6	1506.8	1621.2	1574.5	1455.5	1415.9	1610.6	1482.6
CAFS_HM_T_00075413	4848.6	5107.3	5030.6	4762.9	4712.6	4506.9	4335.6	3926.3	4109.2
CAFS_HM_T_00058680	3283.3	3262	3448.7	3373	3330	3303.7	3283.9	3345.9	3334.6
CAFS_HM_T_00015701	568.9	521.4	538.8	539.7	540.6	513.6	535.1	538.5	553.8
CAFS_HM_T_00023138	3121.5	2980.3	2972.6	3071.5	3060.4	3021.2	2964	2997.8	3023.1
CAFS_HM_T_00018783	1653.9	1647.2	1712.3	1689.8	1716.7	1688	1615	1743	1757.7
CAFS_HM_T_00038325	3395.8	3331.1	3466.5	3236.6	3308.7	3309.2	3410.4	3221.8	3463.1
CAFS_HM_T_00037146	2573.1	2339.7	2770.2	2687.1	2495.3	2535.1	2365.5	2694.9	2593.2
CAFS_HM_T_00024668	4138.7	4146	4054	3850.2	3848.1	4149.4	4030.9	3871.5	3507.5
CAFS_HM_T_00068002	805.6	816	796.5	797.3	792	819.7	821.3	751.5	800.6
CAFS_HM_T_00078983	1110	1133.5	1143.5	1069	1049.2	1138.1	1121.5	1115	1046.1
CAFS_HM_T_00060627	2147.6	2001.2	2110.8	2083	2116.6	1997.3	2088.5	1997.9	2086.9
CAFS_HM_T_00087850	1754.4	1830.9	1731.1	1726	1849.7	1724.9	1830.6	1746.7	1761.4
CAFS_HM_T_00028769	1146.5	1156.5	1212.3	1248.8	1187.8	1191.4	1146.3	1206.7	1221.6
CAFS_HM_T_00045647	2186.6	2177.4	2238.2	2088.1	2198.8	2212	2416.9	2200.1	2308.1
CAFS_HM_T_00088572	3015.1	3057.6	2894.8	2980.9	3013.3	2842.7	2837.1	2986.5	2896.3
CAFS_HM_T_00010672	2529.3	2431	2451.2	2441.2	2469.4	2361.2	2309.6	2505.3	2504.8
CAFS_HM_T_00028762	194.7	178.2	192.6	192.1	189.1	203.4	186.1	179.2	204.3
CAFS_HM_T_00085144	2821.1	2610.1	2762.3	2834.4	2864.5	2713.7	2562.8	3103.9	2810.4
CAFS_HM_T_00050973	2801.5	2713.1	2618.8	2622.9	2692.5	2608.9	2626.4	2567.4	2629.2
CAFS_HM_T_00022059	1949.8	2036.4	1928.8	2031.9	2069.4	1950.2	1903.3	2030.6	1981.3
CAFS_HM_T_00046260	2393.6	2361.2	2345.4	2421.1	2360.9	2284.7	2354.7	2467.4	2265.7
CAFS_HM_T_00055544	2270.5	2236.8	2364.6	2245.3	2259.4	2243.4	2274.4	2340.6	2259.6
CAFS_HM_T_00053705	1794.4	1861.7	1752.4	1675.3	1646.5	1801.1	1789.8	1738.5	1770.1
CAFS_HM_T_00003231	1907.2	1925.8	1906.4	2012.2	2073.8	1943.6	1999.8	2036.3	2064.3
CAFS_HM_T_00046479	3090.9	3095.9	2975.2	3065.3	3160	3020.8	3016.5	3632.3	3116.8
CAFS_HM_T_00017194	6529.1	6370.2	6064.6	4457.3	5187.9	6369	4869.6	6576.8	6146.9
CAFS_HM_T_00070194	3446.9	3243.1	3244.8	3327.5	3400.6	3226.7	3237.2	3549.5	3532.7
CAFS_HM_T_00052904	2463.4	2429.1	2290.4	2384.3	2328.3	2213.9	2347.3	2369.4	2404
CAFS_HM_T_00067068	1686	1763.9	1827.6	1492.2	1574.3	1678.2	1693.2	1689.4	1623
CAFS_HM_T_00040341	3414.2	3538.9	3526.6	3295.3	3345.1	3555.6	3188.3	3296.4	3381.3
CAFS_HM_T_00035477	2340.9	2321.3	2397.8	2545	2538.4	2327.3	2375.1	2519.4	2436.7
CAFS_HM_T_00074258	474	458.5	425.8	455.4	467.5	434.8	443.2	489.9	457.8
CAFS_HM_T_00081054	2663.8	2635.8	2711.1	2743.2	2718.8	2673	2775.3	2917	2926.6
CAFS_HM_T_00046816	2054.1	1904.2	2137	2195.9	2178.1	1953.4	1862	2315.1	2019
CAFS_HM_T_00025041	2883.2	2882.4	2914.7	2909.4	2960.9	2752.3	2846	2852	2753.4
CAFS_HM_T_00076551	4426.2	4383.5	4042.7	3504.5	3365.3	4829.8	4887	3485.5	4406
CAFS_HM_T_00021828	2700.8	2865.2	2455	2536.1	2570	2563.5	2648.4	2678.5	2706
CAFS_HM_T_00083053	1980	1948.7	1915.8	1783.5	1936.8	1833.5	2031.3	1819.9	1851.9
CAFS_HM_T_00072452	2530.1	2738.7	2647.4	2716.8	2843.3	2496.8	2652	2682.9	2778.4
CAFS_HM_T_00076602	2545.9	2832.4	2749.7	2948.7	2948.4	2539.4	2615	2798.7	2646.4
CAFS_HM_T_00059201	2492.6	2428.4	2460.1	2387.7	2393.9	2497.2	2502.8	2375.7	2339.4
CAFS_HM_T_00041607	4772.1	4734.7	4791.6	4780.2	4814.4	4677.9	4684.3	4851.1	4880.3
CAFS_HM_T_00010233	1824.7	2026.2	1966.3	2009.1	2016.1	1930	1811.3	2226	2016.3
CAFS_HM_T_00018595	4500.7	4201.4	4337.4	4637.6	4450.2	4255.5	3895.5	4710.1	4391.9
CAFS_HM_T_00017188	2453.1	2523.1	2415.1	2632.3	2572.3	2347.8	2318.7	2488.1	2311.6
CAFS_HM_T_00069122	1851.2	1892.6	1939.8	1887.3	1853.4	1838.8	1902.6	1796	1977.1
CAFS_HM_T_00022081	2740.7	2848.1	2723.5	2641.7	2811.2	2558.9	2700.7	2729.7	2812.8
CAFS_HM_T_00027631	4063.9	4067.8	3838.3	3825	3927.9	4018.5	3850.9	3912.8	3925.8
CAFS_HM_T_00043326	2940.6	2908.9	2927.2	2680.4	2675.9	3003	2820.2	2789.7	2718.6
CAFS_HM_T_00086819	3009.2	2981	2786.8	2891.7	2973.4	3213.6	3023.3	2903.7	2979.9
CAFS_HM_T_00013316	551.9	617.6	571.9	688.4	581.4	489.1	631.2	619	550.1
CAFS_HM_T_00065031	2776.4	2691.3	2872	2826.6	2934.3	2743	2861.6	2843	2941.8
CAFS_HM_T_00066875	5761.8	5557.9	5757.5	5408.3	5541.6	6004.2	5869.8	5508.8	5909
CAFS_HM_T_00049356	3428	3386.1	3479.1	3367.2	3503.5	3419.1	3424.3	3464.7	3569.5
CAFS_HM_T_00016510	6447.4	6410	6401.7	6279.5	5953.6	6582.4	6749.2	6234.1	6162.8
CAFS_HM_T_00077079	2944.6	3050.3	2690.3	2844.8	2824.5	2625.1	2933.8	2599.8	2802.7
CAFS_HM_T_00057233	1904.2	2091.6	1892.4	1903.2	1768.6	2060.9	2029.1	1867.8	1961.4
CAFS_HM_T_00090873	2534	2606	2329.4	2508.8	2555.2	2511.3	2567.3	2438.2	2411.9
CAFS_HM_T_00090706	2701.1	2739	2665.6	2652.3	2611	2369.4	2708.1	2520.4	2514.9
CAFS_HM_T_00039655	2478.6	2677.5	2365.9	2359	2403	2530.9	2539	2308.5	2565.2
CAFS_HM_T_00029704	2460.9	2382.5	2441.7	2523	2549.8	2405.8	2415	2517.2	2443.6
CAFS_HM_T_00078804	3828.1	4171.5	3850.9	3921	3980.3	3934.5	3960.6	4065.2	4129.3
CAFS_HM_T_00056719	1320	1272.3	1325	1343.3	1312.1	1176.7	1225.2	1304.8	1249.3
CAFS_HM_T_00056710	2185.4	2248.2	2102.8	2095.4	2187.4	2179.8	2140.8	2191.1	2208.8
CAFS_HM_T_00042996	2471.6	2506	2365.8	2539.7	2506.1	2550.4	2477.7	2646.9	2640
CAFS_HM_T_00061439	909.9	911	929.5	949.6	989.5	929.2	941.9	991	898
CAFS_HM_T_00040906	3390.5	3468.3	3245.8	3443.3	3466.3	3348.1	3331.3	3355.6	3515.1
CAFS_HM_T_00087883	1361.2	1319.4	1393.4	1482.5	1541.2	1409	1447.1	1542.8	1515.1
CAFS_HM_T_00013220	1353.1	1305.9	1393.3	1337.7	1209.9	1354.5	1256.5	1424.2	1315.8
CAFS_HM_T_00035316	4031.2	4151.9	3889.8	3639.8	3562.8	4078	4000.7	3473	3619.4
CAFS_HM_T_00022719	3027.2	3002.7	2849.7	2997.2	2982.2	2807.5	2841.2	2926.3	2819.4
CAFS_HM_T_00072952	2453.9	2478.1	2358.1	2535.1	2488.8	2359.4	2417.8	2601.6	2442.3
CAFS_HM_T_00086643	1153.4	1215.7	1102.3	1216	1172.1	1129.9	1116.1	1219.6	1149.8
CAFS_HM_T_00024634	2738.6	2666.7	2641	2661.4	2834	2698.2	2715.6	2813.4	2684.7
CAFS_HM_T_00031897	2881.6	2983.8	2952.9	3399.3	3769.5	3028.4	3223.5	3605.8	3428.8
CAFS_HM_T_00027552	3189.8	2880.6	3242.1	3262.4	3114.5	2884.6	2896.8	3263.6	3151.7
CAFS_HM_T_00002927	1359	1186.8	1280.8	1429.5	1397.9	1207.9	1172.2	1398	1306.1
CAFS_HM_T_00038858	3151.3	2825.1	3209.4	3253.5	3207.4	3026.5	2845.9	3256.7	3166.1
CAFS_HM_T_00069582	5061.7	4677.7	4984.5	4981.3	4885.6	4563.3	4790.7	4947.8	4892.3
CAFS_HM_T_00062244	989.8	948.5	1050.7	963.9	920.2	1042.9	954.2	972.2	967.5
CAFS_HM_T_00065773	1392.8	1396.1	1446	1500.1	1531.8	1366.1	1471.6	1517.2	1474.1
CAFS_HM_T_00082416	2520.1	2584.5	2509.4	2446	2446	2466.4	2436.3	2325.3	2378.6
CAFS_HM_T_00072546	3000.6	2917.1	2945.8	2890	3003.5	2757.1	2934.7	3043.1	2845.7
CAFS_HM_T_00006993	2826.9	2828.7	2672.8	2640.7	2654.7	2584.2	2576.8	2652.7	2651.7
CAFS_HM_T_00016532	5163.3	4449.2	4537.2	4278.8	4407.2	4394.8	4518.7	4423.7	4419.1
CAFS_HM_T_00086895	1983.4	1971.1	1449.3	1817.4	1650	2050.6	1844.8	1493.9	1908.7
CAFS_HM_T_00051798	1320.8	1097.8	1247.7	1323.1	1410	1208.2	1339.8	1373.9	1296.8
CAFS_HM_T_00006780	4586.5	4264.5	5363.6	5304.9	4391.1	4302.8	4216.1	5326.4	5194.2
CAFS_HM_T_00019701	2046.5	2041.8	1880.6	2064.2	1999.5	1815.6	1920	2050.6	2001.7
CAFS_HM_T_00082604	2321.3	2249	2275.7	2343.3	2329.8	2260.6	2199.9	2413.2	2333.2
CAFS_HM_T_00017856	7021.1	7268.5	7227.3	7324.2	6953.3	6809	6915.1	7143.2	6835.1
CAFS_HM_T_00065097	1834.6	1742.4	1778.6	1739.1	1827.1	1779.4	1697.1	1889	1763.2
CAFS_HM_T_00082978	4869.9	4480.3	4833.1	4847.7	4816.6	4942.8	4839	5018.7	4976.2
CAFS_HM_T_00070898	3610.6	3754.6	3647.1	3469.3	3614.6	3758	3874.4	3641.7	3521.5
CAFS_HM_T_00037449	3304.9	3429.5	3296.6	3556.2	3614.5	3432.7	3347.4	3765.6	3614.4
CAFS_HM_T_00081213	4099.5	4099.8	4339.4	4481.3	4246	3888.3	3906.3	4534.3	4129.5
CAFS_HM_T_00014122	4638.2	4649	4874.2	4597.2	4641.1	4520.8	4690.9	4708.4	4798
CAFS_HM_T_00010878	5839.5	5649.3	5732.4	5821.9	6003.2	5433.9	5667.4	6133.5	5703.9
CAFS_HM_T_00070681	1437.5	1421.2	1327.7	1431.3	1501.2	1318.2	1432.9	1460.2	1365.3
CAFS_HM_T_00052893	2854.2	2815	2814.4	2937.2	3058.1	2803.1	2915.2	3124	2964
CAFS_HM_T_00071736	3052.8	2873.2	3182.6	3155.8	3041.4	3046.7	2984.4	3048	3016.3
CAFS_HM_T_00074430	1791	1855.3	1875.5	1820	1681.7	1834.9	1839.3	1721.2	1839.4
CAFS_HM_T_00020870	1586.3	1564.8	1427.9	1457.8	1406.5	1548.6	1440.9	1397.1	1490.3
CAFS_HM_T_00067604	3823	3546.1	3914.5	3747	3556.3	3373.8	3427.1	3545.6	3750.4
CAFS_HM_T_00005587	5934.4	5253	6496	6148.8	6275.3	5839.6	5368.7	7157	6052.7
CAFS_HM_T_00047679	2376.7	2471.3	2561	2723.6	2687.1	2317.1	2383.5	2706.2	2515
CAFS_HM_T_00052797	1898.8	1919.2	1915.2	1856.5	1801.6	1912.3	1795.2	1887.5	1852.9
CAFS_HM_T_00006180	4592.1	4385.2	4955.5	4714.5	4771.1	4503.5	4640.5	4586.7	4468.4
CAFS_HM_T_00052461	2311.5	2362.3	2377.6	2374	2547.7	2332.8	2395.8	2330.2	2403.7
CAFS_HM_T_00089922	1460.4	1224.5	1456.9	1365.3	1306.7	1160.4	1219.4	1421.8	1281.9
CAFS_HM_T_00026788	1744.5	1670.3	1746.3	1744.2	1761.6	1677.4	1670.3	1743.5	1794.8
CAFS_HM_T_00048037	2943.7	2680.9	2772.9	2884.2	3010.1	2673.1	2819.2	2865.4	2822.1
CAFS_HM_T_00031202	2808.8	2458.4	2765.5	2942.8	2715.4	2804.1	2600.9	2977.3	2669.2
CAFS_HM_T_00068798	3171.5	3176.4	3178.4	3277.6	3454	3082.3	3449.7	3101.5	3296.2
CAFS_HM_T_00089422	2784.7	2709.5	2613.4	2395.1	2044.4	2697.9	2514	2080	2489.8
CAFS_HM_T_00078874	2532.6	2346.4	3051.8	2224.6	2215.3	2780.7	2692.1	2538.4	2630.8
CAFS_HM_T_00004032	1132.1	1086.4	1095.8	1069.2	1164.8	1049.1	1101.7	1092	1201.1
CAFS_HM_T_00006377	1781.3	1647.1	1775.3	1600.1	1635.9	1629.7	1685.7	1573.7	1731.5
CAFS_HM_T_00031362	1007	987.7	980.7	998.2	963.8	1025.9	1047.1	985.3	978.2
CAFS_HM_T_00045376	3498.1	3428	3440.7	3671.7	3534	3401.4	3553.3	3461.2	3555.7
CAFS_HM_T_00081039	2439.7	2596.3	2357.8	2268	2590.6	2564.1	2606	2126.9	2466.7
CAFS_HM_T_00021889	3191.5	3129.3	3199.7	3385.6	3350.5	3273.5	3184.6	3379.5	3213.8
CAFS_HM_T_00029544	1841.5	1877.9	1746.7	1733.2	1802.7	1996.7	2007.8	1803.9	1960.9
CAFS_HM_T_00015642	4483.6	4577.3	4512.7	4630.4	4658	4611.5	4522	4704.4	4474.6
CAFS_HM_T_00029706	2021.8	2035.7	2100.7	2089.9	2072	2057.8	2137.3	2155.5	2043.6
CAFS_HM_T_00086286	2789.1	2212.5	2884.6	2432.7	2384.1	2292.8	2068.2	2579.9	2461.3
CAFS_HM_T_00034552	3504.8	3587.7	3463.3	3502.2	3612.2	3505.4	3488.5	3522.2	3546
CAFS_HM_T_00067454	2362.4	2295	2398	2395.4	2427.2	2385.6	2243.2	2527.5	2414.2
CAFS_HM_T_00089584	5516	4970.8	5786.7	5427.9	5153.5	5237.7	4863.6	6489.8	5623.1
CAFS_HM_T_00077329	2749.4	2759.2	2773.5	2848.6	2845.8	2712.7	2931.6	2877.6	2937.6
CAFS_HM_T_00070365	1346.4	1337.6	1377.7	1293.1	1333.6	1296.7	1313.5	1292.7	1307.2
CAFS_HM_T_00086662	3678.2	3855.3	3551.3	3728.9	3755.6	3859.1	3664.9	3592.5	3700.1
CAFS_HM_T_00038873	1080	1063.2	1067.6	1064.8	1069	1019.9	1029.2	1152.8	1010.8
CAFS_HM_T_00050545	2141	2007.8	2104.2	2027.2	2079.5	2032.8	2015.2	2228.7	2073.1
CAFS_HM_T_00044201	1223.7	1213.6	1284.1	1175.8	1107.9	1363.4	1377.5	1219	1103.9
CAFS_HM_T_00067660	3677.9	3433.7	3804.1	3844.3	3782.7	3484.2	3455.5	3838.2	3661.5
CAFS_HM_T_00061238	3416.8	3543.8	3389.7	3252.1	3098.6	3818	3406.4	3440.7	3836.7
CAFS_HM_T_00024850	477.7	286.1	207	290.8	580.2	280.5	246.9	304.4	305.5
CAFS_HM_T_00005949	1133.2	1108.6	1244	1256.7	1198.2	1223.5	1243.4	1161.4	1121.6
CAFS_HM_T_00069169	585.4	620.7	491	592.2	520.9	469	497.5	524.1	558.9
CAFS_HM_T_00040116	1798.5	1724.8	1768.1	1641.7	1748.5	1727	1776	1666.7	1623.4
CAFS_HM_T_00056147	3493.7	3428.1	3358.5	3499.8	3622.2	3388.5	3539.7	3515.1	3452.2
CAFS_HM_T_00005623	1199.8	1214	1250.3	1257.6	1248	1227.9	1233.8	1282.5	1275
CAFS_HM_T_00074004	2132.1	2007	1927.1	1705.3	1704.2	2011.8	1544.9	1750	1838.3
CAFS_HM_T_00041167	2950.4	3043.8	2901.7	2888.7	3012.1	2914.8	2990.3	2859.5	3020.3
CAFS_HM_T_00029710	3392.4	3606.1	3196.2	2839.6	3168.6	3356.9	3685.3	2673.5	3452.3
CAFS_HM_T_00019133	2727.6	2561.9	2791.9	2447.9	2638.8	3014.5	2399.8	2945.4	3101
CAFS_HM_T_00027075	2619.9	2572.2	2642	2465	2557.3	2482.5	2544.5	2470.2	2586.5
CAFS_HM_T_00025954	2360.8	2440.5	2205.3	2256.1	2293.8	2330.5	2180.8	2190.7	2364.1
CAFS_HM_T_00076386	3790.4	2782.5	3525.6	1886.6	2456.8	1990.6	2993.5	2417.2	2947.8
CAFS_HM_T_00048864	704.3	679.1	731	740.5	680.2	686.1	666.8	725.9	734.1
CAFS_HM_T_00069954	3671.4	3624.6	3450.4	3778.8	3817	3759.6	3582.3	3918.4	3671
CAFS_HM_T_00081922	4895.9	4996.2	4755.2	4170.4	4051.6	4909.5	4776.8	4279	4564.5
CAFS_HM_T_00031125	2003.2	1958.8	2007.7	1923.6	1990.7	2016.9	2046.5	1988.4	1934.2
CAFS_HM_T_00072746	3775.3	3595	3684.4	3698.7	3586.3	3555.6	3610.7	3742.5	3666.1
CAFS_HM_T_00058123	1970.2	1953.3	1912.4	1920	1910.5	1846.9	1936.5	1849.5	1953.3
CAFS_HM_T_00013126	4521.6	4215.7	3894.2	4017.5	4192.8	3962.5	3814.6	3838.4	3938.5
CAFS_HM_T_00063933	2423.4	2501.8	2376.5	2336.3	2332.7	2431	2464.4	2267.6	2523.8
CAFS_HM_T_00069422	3206.4	3151.1	3420.1	3246.7	3289	3196.6	3136.1	3232.2	3171.6
CAFS_HM_T_00017129	1424.3	1410.6	1451.1	1447.5	1451.2	1386.2	1390.6	1490.7	1402.1
CAFS_HM_T_00068116	2681.5	2845.2	2631.4	2835.2	2845.3	2762.9	2864.9	2802.5	3088.3
CAFS_HM_T_00012761	1538.6	1590.8	1541.4	1522.6	1602.6	1517.5	1593.3	1508.7	1535.8
CAFS_HM_T_00079783	1514.3	1533.2	1397.1	1509.4	1571.9	1411.1	1431.1	1527.8	1414.5
CAFS_HM_T_00028088	2532.2	2560	1875.6	2522.6	2245	2877.2	2667.6	2467.6	2730.9
CAFS_HM_T_00021849	2414.2	2535.6	2402.8	2599.7	2508.6	2486.1	2467.8	2491.8	2410.7
CAFS_HM_T_00006426	2814.8	2755.1	2882	2958.8	2924.3	2762.8	2762.9	2905.5	2788.8
CAFS_HM_T_00020983	676.8	654.8	608.3	665.6	682.7	765.7	660.9	661.2	663.9
CAFS_HM_T_00082643	3104.2	3026.6	2910.1	2961.1	2981.1	3008	3256.5	2809.8	3088.1
CAFS_HM_T_00074774	1376.2	1383.4	1322.8	1298.9	1264.2	1257.2	1358.4	1261.6	1264.9
CAFS_HM_T_00075464	4055.4	4085.5	4225.6	3916.3	3976.8	3915.3	4158.1	4073.3	3974.9
CAFS_HM_T_00013993	1256.5	1201	1218.3	1267.7	1298.8	1256.1	1247.2	1282	1241.1
CAFS_HM_T_00033379	3041.9	3025.4	3041.5	3030.4	2998.3	2916	3029.9	2976.4	3077.4
CAFS_HM_T_00071518	2964.7	2931.1	2729.6	2667.7	2662.2	2971.4	2870.6	2707.6	2917.3
CAFS_HM_T_00021073	1712.9	1674.4	1762.1	1761	1882.9	1647.4	1645.5	1719.7	1827.6
CAFS_HM_T_00077970	1408.8	1328.7	1470.4	1511.1	1519.7	1447.8	1322.6	1578.3	1459.9
CAFS_HM_T_00042826	2724.5	2674	2636.7	2718.6	2704.7	2682.7	2656.1	2915.1	2889.2
CAFS_HM_T_00060399	2284.5	2040.4	2210.2	2132.5	2140.2	2035.9	2096.9	1993.8	1987.2
CAFS_HM_T_00066340	4035.5	4914.4	3917.4	4883.8	5546.8	4131.2	5139.2	4097.6	5194.7
CAFS_HM_T_00064443	1578.7	1572.8	1619.7	1540	1492.8	1407	1486.5	1560.9	1503.4
CAFS_HM_T_00086220	3883.5	4222.3	4027	3540.6	3452.4	4307.5	4237.1	3292.2	4011.4
CAFS_HM_T_00085056	2977.7	2821.1	2984.8	3055.6	3068.8	2953.1	2770.9	3264	3129.3
CAFS_HM_T_00034902	1420.8	1348.2	1371	1444.9	1456	1238.5	1343	1456.5	1347.2
CAFS_HM_T_00013037	3533.3	3078.3	2513.2	3448.3	2943.4	2816.5	2877.7	3212.4	2730.8
CAFS_HM_T_00074041	1821.2	1754.5	1887.5	1824.2	1763.1	1852	1726.3	1821.7	1871.2
CAFS_HM_T_00021256	3481.9	3521.7	3493.7	3465	3522.9	3207.8	3209.9	3632.8	3599.4
CAFS_HM_T_00081370	2317.9	2299.6	2213.8	2433.3	2692	2378	2279.2	2831.6	2483.7
CAFS_HM_T_00069043	1903.9	1865.7	1914.3	1951.1	1965.4	1821.1	1846.8	2031.4	1939.2
CAFS_HM_T_00011977	2760.2	2760.8	2716.6	2752.5	2738.2	2656.2	2655.9	2808.1	2748.3
CAFS_HM_T_00015406	1766.5	723.2	1558.8	1141	1368.3	2432.6	1330.2	2901.8	763
CAFS_HM_T_00069933	834.2	780	805.2	829.7	805.9	748.5	840	864.7	910.3
CAFS_HM_T_00036633	3389	3417.6	3412.1	3498	3523.2	3235	3473	3367.9	3419
CAFS_HM_T_00090680	3215.1	3228	3080.2	3189.5	3087.6	3342.5	3097.4	3070	3106
CAFS_HM_T_00076272	2254.9	2376.7	2017.2	2144.7	2582.7	1929.2	2864.6	1944.4	2308.9
CAFS_HM_T_00001890	2063.4	1288.7	1492.6	1495.9	1214.7	2021.5	1145.4	2844.5	3235.2
CAFS_HM_T_00074092	1381.3	1233.8	1370.7	1332.4	1331.8	1229.9	1212	1334	1281.1
CAFS_HM_T_00077719	2486.3	2497.2	2851.3	2630.6	2718.7	2565.8	2734.3	2642.4	2652.8
CAFS_HM_T_00042766	2775.4	2723.5	2802	2566.6	2804	2680.4	2653.9	2878.5	2839.9
CAFS_HM_T_00019817	3207.9	3322.3	3248.8	3384.4	3396.2	3124.7	3284.5	3247.6	3334.2
CAFS_HM_T_00059230	1604.8	1688.8	1557.3	1770.2	1676.3	1540.8	1556.6	1718.2	1581
CAFS_HM_T_00014693	2256.4	2236.9	2321.6	2308.3	2147.9	2071.3	2224	2317.4	2277
CAFS_HM_T_00088487	3869.6	3804.8	3686.7	3744	3589.7	3509.6	3504.4	3705.4	3706.4
CAFS_HM_T_00069383	2729.9	2554.9	2773.9	2645.9	2583.8	2677.7	2595.2	2809.3	2718.2
CAFS_HM_T_00003351	2074.5	2004.5	1945.9	2061.3	2018.5	1973.8	1984.8	2018	2034.8
CAFS_HM_T_00072728	3985.3	3886.2	4016.7	3859.7	4134.6	3768.7	3958	4029.2	3909
CAFS_HM_T_00013890	2532.2	2485.8	2556.5	2801.3	2596.5	2383.8	2476.9	2486	2467.4
CAFS_HM_T_00045002	1083.8	1309.7	1207.1	1099.2	1128.1	1228.1	1060.5	1304.2	1066.2
CAFS_HM_T_00015034	3728.1	3609.1	3728.2	3671.7	3848.3	3629	3573.8	3747.4	3742.8
CAFS_HM_T_00006315	3225.9	3263.2	3006	3171.2	3281.6	2978.3	3273	3077	3146.6
CAFS_HM_T_00075045	1849.4	1737.7	1838	1722.9	1706.5	1813.6	1677.1	1704.8	1689.3
CAFS_HM_T_00005390	1910.7	2225.3	1937.5	2352.6	2246.3	1705	2311.2	1873.3	1915
CAFS_HM_T_00008159	111.3	134.2	89.8	150.2	109.7	120.5	151.2	115.7	112.7
CAFS_HM_T_00088207	541.1	508.6	542.8	544.2	538.2	551.7	551.8	564.2	543.3
CAFS_HM_T_00090865	1506.6	1507.4	1508.4	1556.3	1512.7	1536.2	1507.2	1541.9	1483.6
CAFS_HM_T_00012732	3297.6	3266.6	3264.9	3217	3287.2	3149.1	3318.1	3165.1	3190.3
CAFS_HM_T_00044859	3069.7	2900.1	3239.8	3145	3289.8	2986.5	3042.2	3227.5	3103.5
CAFS_HM_T_00085736	1846.5	2055.1	1997.5	2054.6	2000.3	1876.7	1866.4	1962.7	2004.5
CAFS_HM_T_00064369	1547.4	1379.4	1635.2	1560.5	1500.9	1588.3	1378.9	1637.2	1437.7
CAFS_HM_T_00003972	4367.8	4728.7	4428.7	4427.6	4578.3	4737.2	4762.6	4428.7	4976.2
CAFS_HM_T_00087278	1056	831.7	1043.5	873.4	905.8	1012.6	1054.5	993.8	902.3
CAFS_HM_T_00003225	4160.4	4635.4	4611.6	5187.1	4226.9	4469.1	5299.8	4097.6	4273.5
CAFS_HM_T_00071323	2481.5	2469.7	2501.2	2403.6	2497.5	2460.5	2597.7	2412	2480.4
CAFS_HM_T_00013853	3521.2	3573.4	3394.6	3635.5	3599.8	3337.9	3487.7	3853.4	3596.9
CAFS_HM_T_00087625	1059.8	1471.8	1062.7	1237.8	1110.8	1121.6	1224.9	1312.1	1190.1
CAFS_HM_T_00030513	800.4	716.8	806.8	806	792.9	793.9	732.3	839.4	783.3
CAFS_HM_T_00071024	1284.7	1310.1	1308	1337.1	1350.5	1311.7	1404.9	1309.4	1215.1
CAFS_HM_T_00032493	2654.9	2641.1	2665.1	2601.9	2590.2	2674.9	2668.5	2685.2	2621.3
CAFS_HM_T_00041756	3480.2	3524.1	3115.8	3002.7	2958.7	3437.8	3628.6	3367.4	3442.7
CAFS_HM_T_00048314	2192.5	2154.5	2323.5	2181.6	2188.8	2315.7	2175.2	2260.9	2155.2
CAFS_HM_T_00029546	467.3	489	472.5	520.1	487.6	482.9	467.8	502.6	496.7
CAFS_HM_T_00034512	2766.8	2565.7	2826	2769.8	2768.9	2657	2796.4	2143.2	2450.4
CAFS_HM_T_00069566	2614.5	2960.5	2694.1	2681.7	2677.2	2671.1	2708.2	2701.1	2672.3
CAFS_HM_T_00081450	2086.3	1894.8	2096.2	1872.9	1973	1781.3	1857.5	1801.1	1781.8
CAFS_HM_T_00048762	2267.1	2253.7	2496.8	2476.3	2628.8	2330	2579	2594.8	2610.7
CAFS_HM_T_00028649	2136.5	2038.9	2253.5	2213.2	2322.6	2145.7	2211.6	2244.3	2219.7
CAFS_HM_T_00011558	3070.7	2904.1	3156.2	3221.9	3212.2	3031	3025.7	3233.3	3128.9
CAFS_HM_T_00028194	2786.1	2882.8	3100.3	3026.3	3180.5	3042	2983.3	3127.6	2954.9
CAFS_HM_T_00089433	1919.5	1880.8	1858.5	1830.3	1867.7	1774.9	1802.2	1843.9	1852.7
CAFS_HM_T_00080628	3712.8	3602.5	3582.1	3521.3	3435.2	3650.8	3730.5	3362.7	3299.4
CAFS_HM_T_00043726	1580.6	1669.2	1567.2	1639.1	1562.2	1585.1	1605.6	1586.4	1621.9
CAFS_HM_T_00028746	1947.8	2002.9	1944.9	2039.3	1996.8	1998	2132.8	1929.7	2093
CAFS_HM_T_00092242	3891.1	3856.9	3658.6	3902.1	3930.3	3640.8	3723.8	3852.5	3768.3
CAFS_HM_T_00065937	4173.4	4201.3	4642.9	3465.1	4171.4	4263	3785.2	4525.1	3927.1
CAFS_HM_T_00071846	2555.8	2484.9	2522.6	2565.9	2591.6	2396.9	2538.1	2462.2	2492.2
CAFS_HM_T_00090136	2791.5	2728.1	2750.9	2824.5	2871.4	2785.4	2781.8	2838.1	2846.7
CAFS_HM_T_00052588	1312.7	1230.6	1431.1	1360.1	1370.8	1377.8	1166.8	1507.3	1281.7
CAFS_HM_T_00018630	213.8	212.1	200.4	221	218.1	203.2	207.8	210.9	200.6
CAFS_HM_T_00069463	5081.7	5248.7	5307	5148.5	5075.5	5214.5	5217	5010.7	5226.7
CAFS_HM_T_00047573	683.5	661.2	682	701.3	705.3	632.3	629	694.2	669.4
CAFS_HM_T_00029226	1848.4	1713	1885.2	1914.2	1742.5	1657.2	1568.6	1855.3	1851.5
CAFS_HM_T_00014881	2424.5	2059.6	2618.2	2450.7	2385.7	2328.7	2244.2	2532.7	2370.7
CAFS_HM_T_00067641	2695.6	2617.5	2992.6	2573.5	2391.1	2652.8	2489.3	2553.9	2514
CAFS_HM_T_00029724	2999.7	3203.4	3025.1	3013.9	3055.3	2911.2	2631.3	3148.1	2660.7
CAFS_HM_T_00092009	2935.5	2794.6	2486.8	2801.8	3124.9	3075.1	2873.2	2112.7	3245.9
CAFS_HM_T_00083214	1829.9	1700.6	2335.7	2414.7	2168	2590.7	2663.5	1914.9	2713.9
CAFS_HM_T_00031451	2313.2	2097.3	2098.9	1919.2	1806.5	2186.9	2195.4	1808.8	2001.9
CAFS_HM_T_00021427	1469	1536	1385.7	1433.7	1544.8	1468	1552.4	1367	1346.1
CAFS_HM_T_00070380	971.2	948.9	940	947.1	988.4	911.4	994.8	951.8	956.5
CAFS_HM_T_00018345	2693.2	2990.2	2339.8	2346.8	2254.7	2528.6	2370.1	2517.5	2439.1
CAFS_HM_T_00078343	2455	2440.1	2457.9	2444.4	2410.8	2447.3	2520.5	2443.3	2482.8
CAFS_HM_T_00062519	1910.8	1852.2	1893.3	1900.8	1983.5	1958.9	1945.5	1972.9	1936.8
CAFS_HM_T_00013096	3266.2	3412.1	3316.3	3307.4	3391.6	3115.7	3329.2	3360.6	3324
CAFS_HM_T_00040009	2035.4	2100.9	2057.1	1979.9	1948.5	2184.9	2174.5	1961.3	2041.7
CAFS_HM_T_00008950	1108.3	1034.4	1067.2	1079.1	1067.9	1091.8	1103.4	1077.9	1101.4
CAFS_HM_T_00072456	4048.5	3840.9	4123.3	4149.1	4178.9	3773.7	3741.3	4154.9	3987.7
CAFS_HM_T_00015612	2353.6	2370.4	2316.7	2290.1	2210.3	2220.4	2184.5	2233.8	2230.7
CAFS_HM_T_00026393	3779.8	3901.1	3471.8	3329.7	3261.8	3373.5	3676.9	3178.4	3423.7
CAFS_HM_T_00085036	2558.8	3695.3	1761.3	2294.8	2574.6	1909	1881.5	1560.3	1643.3
CAFS_HM_T_00023390	1697.2	1646.5	1776.7	1731.4	1748.5	1718.5	1765.4	1798	1771.6
CAFS_HM_T_00008643	2713.4	2664.1	2450.5	2644.1	2725.4	2620.9	2677.4	2767.6	2623.7
CAFS_HM_T_00086319	2709.8	2724.7	2639.4	2707.6	2431.3	2643.6	2780.3	2643.2	2719.5
CAFS_HM_T_00031942	3405.4	3365.1	3228.6	3353.6	3422.1	3217.3	3119.4	3481.6	3371.5
CAFS_HM_T_00035439	4585.5	4587.7	4408.2	4498.6	4755.4	4158.6	4639	4463.1	4330.6
CAFS_HM_T_00011872	1776.8	1740.4	1753	1680	1670.7	1769.4	1654.9	1757.7	1625.8
CAFS_HM_T_00051499	3655.1	3494.7	3568.4	3708.1	3637	3434.3	3487.6	3810.1	3600.6
CAFS_HM_T_00031462	6703.1	6711.7	6909.8	5726.4	5223.2	6871	6739.2	5480	6392.9
CAFS_HM_T_00011273	3037.4	2828.4	3406.5	3272	3044.8	2839.4	2596.6	3308	3111.2
CAFS_HM_T_00059823	172.3	156.4	147.6	185	174.8	150.7	162	171.9	157.9
CAFS_HM_T_00005153	3576.2	3318.4	3578.4	3613.2	3781.6	3613.5	3547.2	3977.3	3705.6
CAFS_HM_T_00070529	1206	1369.8	1245.3	1277	1269.4	1284.3	1330.9	1282.9	1291.1
CAFS_HM_T_00089666	569.8	574.5	581	555.5	556.4	560.5	571.1	542.6	538.9
CAFS_HM_T_00016065	144.5	172.6	156.6	153.4	158.8	149.7	135.4	146.9	164.3
CAFS_HM_T_00036310	3007.7	2923.1	2429.8	2702.8	2140.7	1985.6	1959.9	2066.1	2503
CAFS_HM_T_00016265	2602.5	2532.7	2631.1	2439.6	2500	2544.4	2560.4	2662.4	2733.3
CAFS_HM_T_00063982	3048.8	2811.6	3101.8	2888.8	2535.3	2612.2	2501.1	2589.8	2877.8
CAFS_HM_T_00011060	3478.3	3401.8	3686.3	3506.1	3296.1	3801.6	3783.4	3712.4	3465.9
CAFS_HM_T_00043021	2854.2	2989.1	2657.1	2569	2547.2	2833.3	2838.7	2430	2712.1
CAFS_HM_T_00036307	3650.9	5021.5	2609.8	3486.8	4175.5	2682.6	4014.2	2968.8	3879
CAFS_HM_T_00035816	1482.1	1496	1614.5	1615.5	1699.5	1471.6	1602.9	1698	1516.4
CAFS_HM_T_00027003	2210.4	2600	2138.2	1748.9	1913.3	2760.6	2366	1747.4	2223.6
CAFS_HM_T_00059764	1172.4	1228.8	1143.7	1210	1241.5	1294.4	1217.2	1282.7	1280.3
CAFS_HM_T_00022327	1546.9	1426.9	1552.7	1462.2	1565.5	1365.4	1582.1	1502.9	1465.8
CAFS_HM_T_00077423	1687.4	1668.5	1774	1643.5	1619.9	1635.2	1691.8	1619.5	1715.4
CAFS_HM_T_00035121	2317.7	2311.8	2362.2	2436.4	2445.5	2364.5	2357.6	2511.7	2560.5
CAFS_HM_T_00010738	3349.7	3035.5	3419.6	3296.2	3044.3	3122.7	2802.5	3595.9	3115.3
CAFS_HM_T_00003950	3021.3	2948.4	2891.6	2914.7	3035.7	2724.7	2843.2	2732.5	2757.2
CAFS_HM_T_00013525	4090.2	3969.8	4159	4118.8	4083	4072	3806.9	4243.7	3960.5
CAFS_HM_T_00003310	3210.3	3264.6	3133.5	3219.5	3263.9	3226.7	3159.9	3454.7	3369.4
CAFS_HM_T_00011183	314.2	304.8	306.9	310.4	286	354.9	309.4	304.5	325.9
CAFS_HM_T_00058058	246.9	328.2	184.4	334.8	449.5	484	499	515	419.5
CAFS_HM_T_00053411	1810.8	1827.8	1873.4	1792.7	1857.6	1997	1864.9	1857.6	1875.3
CAFS_HM_T_00081668	3128.7	3011	2964.1	2996.1	2939.7	2803.1	2966.9	2915.2	2838.6
CAFS_HM_T_00053918	3120.6	3314.9	3112.4	3073.4	3177.1	3394.1	3440.9	3258.8	3245.8
CAFS_HM_T_00021130	3915.5	4392	3536.2	4694.5	4598	3447.3	4135	4015.2	4034.7
CAFS_HM_T_00049569	4607.5	4399.9	4870.6	4621.8	4668.4	4870.3	4394.2	5291.9	4688
CAFS_HM_T_00075629	1707.1	1575.3	1703	1607.8	1680.3	1675.5	1589.2	1668.4	1562.3
CAFS_HM_T_00026363	2855.8	3176.4	2739.1	2794.4	2485.2	2900.6	2835.6	2797.5	2917.5
CAFS_HM_T_00038258	1746.4	1652.5	1720.9	1681	1677.2	1780.2	1700.8	1740.3	1718.4
CAFS_HM_T_00040362	1985.6	2073.8	1958.7	1945.2	1881.7	1958.4	1959.8	1915.1	1935.9
CAFS_HM_T_00055728	2415.4	2202.3	2629.7	2558.1	2607.4	2449.7	2297.2	2722.1	2418.6
CAFS_HM_T_00031758	2106.5	1722.5	2292.5	2080.7	1857.4	1701.3	1640.7	2310.9	2110
CAFS_HM_T_00088581	4017.8	3975.7	3875.6	3853.9	3749.5	3898	3966.2	3661.2	3863.4
CAFS_HM_T_00062831	1326.7	1333.2	1421.8	1355.3	1351	1358.5	1370.4	1309.9	1346.1
CAFS_HM_T_00081075	278.9	249.8	272	287.9	257.9	256.5	285	306.2	258.4
CAFS_HM_T_00057622	1939.2	1715.5	2105.3	1959.3	1921.6	1970.6	1910.5	2093.9	1945.5
CAFS_HM_T_00062863	2751.5	2775.5	2959	2878.5	2809.2	2696.4	2924.8	2842.7	2552.9
CAFS_HM_T_00019043	3349.8	3454.2	3486.4	3691.6	3817.8	3434.1	3425.9	3956.3	3900.5
CAFS_HM_T_00038965	2725	2806.1	2588.2	2644.3	2778.2	2559.7	2689.2	2684.3	2826.8
CAFS_HM_T_00057480	3122.5	2823.9	2879.3	3102.4	2769.2	2722.3	2694.3	2899.3	3004.7
CAFS_HM_T_00062757	3849.3	3603.8	3910	3630.5	3635.2	3797.4	3616.8	3808.6	3617.1
CAFS_HM_T_00043105	1145.6	1048.9	1052.6	1062.2	1095.2	1075.3	1010.4	1036.1	1040.4
CAFS_HM_T_00004548	1900.3	1986.3	1904.5	1907	1857.2	1838.6	1980.7	1892	1937.6
CAFS_HM_T_00010173	3865.7	3863.4	3748.1	3790.1	3870.3	3781.7	3910.4	3895.7	3957.8
CAFS_HM_T_00032817	3697.1	3496.7	3541.9	3474	3393	3453	3528.3	3567.6	3481.4
CAFS_HM_T_00046550	840.5	998.7	652.9	648.1	830.3	661.4	768.8	724.5	716.1
CAFS_HM_T_00082980	5137.7	4753.1	4749.4	4870.6	4741.3	4888.7	4743	4824.5	4805.2
CAFS_HM_T_00072570	2011.5	2037.7	2001.2	2033.1	2048.9	2058.3	1934.6	2180.6	2116.3
CAFS_HM_T_00058804	2995	2744.6	3055.7	3119.7	3029.8	2911.8	2857.8	3308.7	3071.1
CAFS_HM_T_00049194	2638.8	2608.1	2787.8	2726.4	2849.4	2609.7	2600.7	2835.2	2737.5
CAFS_HM_T_00034024	2596.3	2588.7	2512	2592.3	2649.9	2496.5	2588	2627.6	2575.9
CAFS_HM_T_00015305	1111.1	989	1161.2	1198.2	1117.6	1055.5	1042.6	1168.3	1052.3
CAFS_HM_T_00068693	2762.3	3012.8	2577.2	2659.2	2689.9	2840.4	2729.9	2926	2775.7
CAFS_HM_T_00059139	1513.6	1438.3	1543.8	1481.9	1434.9	1500.2	1452.2	1492.8	1487.8
CAFS_HM_T_00051022	1709.9	1668.6	1621.7	1652.2	1731.5	1627.4	1659.5	1647.6	1642
CAFS_HM_T_00082878	2406.5	2141.6	2124	2171.7	1896.4	2446.3	2057.3	2130.4	2161.3
CAFS_HM_T_00075335	2098.8	1810.2	2664.9	2361.5	2043	1980.9	1749.5	2639.2	2252.2
CAFS_HM_T_00065524	610.9	650.1	565.4	575.7	528.9	578.5	592.8	534.7	561.4
CAFS_HM_T_00065267	2294.5	2183.9	2354.4	2403.7	2169.2	2187.5	2112.7	2216.8	2169
CAFS_HM_T_00029081	2039	1280.7	2121	1996.5	2103.6	1855.6	1909.3	2098.8	1946.7
CAFS_HM_T_00081537	4031.3	4967.1	3855.6	2987.1	2714.4	4931.1	3638.1	3118.4	3283.2
CAFS_HM_T_00091423	2442	2323.7	2418.4	2397.8	2441.1	2288.5	2279	2444.3	2342
CAFS_HM_T_00087621	552.7	452.5	444.7	441.4	403	658.3	621.9	652.1	530.4
CAFS_HM_T_00003809	4298.8	3875.2	4649	4313.7	4284.2	4155.8	3933.7	4522.4	4178.1
CAFS_HM_T_00079116	2131.9	2087.1	2109.6	2223.7	2092.1	2108	2119	2177.7	2093.7
CAFS_HM_T_00081646	2336.8	2415.9	2205.7	2211.8	2221.3	2316.6	2220.5	2232.2	2289.2
CAFS_HM_T_00015571	5169.1	5292	5046.4	4996.1	4975.4	4768.1	5173.2	4830.7	5051.9
CAFS_HM_T_00016387	5205	5603.9	5133.6	5155.2	5334.5	5349.2	5002.7	5520.2	5248.4
CAFS_HM_T_00027955	6321.1	6226.7	6397.4	5777.1	5733.6	6931.1	7300.4	5948.1	6606
CAFS_HM_T_00024304	2516.2	2236.3	2464.4	2515	2488.7	2357.5	2436.9	2599.5	2529.4
CAFS_HM_T_00051738	3111.4	2879.2	3190.1	3272	3250.5	3107.9	2902.5	3364.9	3161.9
CAFS_HM_T_00036302	2192.3	2116.4	2268.3	2252.6	2394.6	1985	2205.3	2236.4	2357.9
CAFS_HM_T_00038498	1505.3	1443.5	1537.7	1502.4	1488.8	1461.6	1457.1	1521.9	1503.9
CAFS_HM_T_00050022	4897.6	4478.9	5050.2	5062.4	4903.2	4621.5	4647.8	5094	4787.6
CAFS_HM_T_00088450	2362.6	2316.4	2276.6	2331.3	2287	2219.4	2295.8	2273.8	2325.1
CAFS_HM_T_00030865	4717	4979.8	4800.8	4846.1	4948.7	4600.1	4633.3	4589.3	4713.3
CAFS_HM_T_00030749	1530.5	1564.9	1483.4	1489.2	1507.2	1670.9	1601	1401.1	1572.8
CAFS_HM_T_00072140	2265.1	2324.8	2316.9	2497.2	2308	2255.2	2255.1	2309.9	2286.8
CAFS_HM_T_00091334	2588.6	2607.7	2737.4	2803.7	2768.7	2791.2	2642.2	2865.8	2860.6
CAFS_HM_T_00043146	3345.6	3314.5	3555.4	3283.3	3405.4	3144.7	3266.8	3537.5	3499
CAFS_HM_T_00001446	3504.6	3442.9	3503	3671.6	3583.8	3474.4	3535.8	3498.9	3483.1
CAFS_HM_T_00006758	3191.4	3213.5	3123.9	3040.6	3018.1	3307.2	3165.7	3090.9	3037.2
CAFS_HM_T_00085948	1814.9	1893.6	1829.8	1863.3	1922	1828.1	1775.9	1908.2	1850.6
CAFS_HM_T_00017410	4540.1	4165.2	4666.6	4420.5	4456.1	4165.4	4405.6	4428.9	4504.7
CAFS_HM_T_00015603	1768.8	1703.7	1727.9	1684.7	1815.8	1693.8	1621.9	1769.7	1824.8
CAFS_HM_T_00014748	1519.4	1611.2	1459.3	1731.1	1402.7	1674.9	1561	1436.4	1506.1
CAFS_HM_T_00077726	925.6	883.9	913.6	879.2	892.4	872.1	858.1	810.5	887.6
CAFS_HM_T_00073966	4159.2	4198.8	4192.1	4095.7	4101.3	4078.4	4209.5	4163	4281.4
CAFS_HM_T_00016804	1485.1	1539.1	1491.2	1423.2	1494.9	1547	1539.9	1387.4	1518.9
CAFS_HM_T_00042046	2338.1	2395.4	2279.6	2205.5	2216	2368.7	2459	2123.6	2164.1
CAFS_HM_T_00020406	932	993.7	950.8	926	980.4	950.6	1041.1	953.6	975.7
CAFS_HM_T_00071120	2024.9	1983.2	2104.3	1830.8	1723.9	1717.8	1547.3	1845.8	1767.5
CAFS_HM_T_00029076	1445.3	1401.6	1475.7	1409.4	1429.3	1423.5	1410.4	1372.9	1412.5
CAFS_HM_T_00011605	2745.5	2910.1	2790.9	2938	2989.2	2759.6	2874.4	2627.1	2890.2
CAFS_HM_T_00086233	3113.8	2885.3	3242.6	3160.6	3087	2856.3	2938	3042.6	3158.2
CAFS_HM_T_00020208	2739.1	2723.7	2695	2807.6	2794.3	2848.5	2639.7	2866.3	2693.1
CAFS_HM_T_00020686	4987.7	4825.1	4927.1	4968.9	4866.8	4797	4909.7	5077.9	5200.8
CAFS_HM_T_00068852	2629.9	2556.4	2748.5	2789.6	2708.4	2522.5	2614.8	2749.6	2824.6
CAFS_HM_T_00016649	3475.3	3582	3281.1	3195.3	3528.4	3466.7	3904.9	3277.2	3458
CAFS_HM_T_00014234	2918.3	3271.5	3140.5	3089.5	3049.7	3153	3266.2	2998.5	3112.5
CAFS_HM_T_00013087	2995.4	2790.4	2825.7	2940.2	2997.4	2870.1	2862.8	3015.8	2905.5
CAFS_HM_T_00027040	1565.1	1709.8	1748.9	1660.5	1619.1	1893.1	1796.8	1663.8	1719.4
CAFS_HM_T_00013573	2699.5	2528.8	2544.1	2325.4	2116.3	2854	2428.2	2727.5	2967.6
CAFS_HM_T_00044414	1914.6	1932.4	1907.6	1998.5	2091.6	1897.5	1952.5	2099.5	1960.9
CAFS_HM_T_00068173	284.5	298.9	505.4	310.9	296	478.3	426.6	311.5	343.5
CAFS_HM_T_00032538	1816.1	1844.5	1725.3	1855.4	1803.4	1737.8	1748.2	1722.2	1781.4
CAFS_HM_T_00073569	2601.8	2699.3	2682.7	2788.9	2573.1	2511.9	2581.4	2684.8	2486.4
CAFS_HM_T_00031399	998.9	1095.1	909.7	1161.2	1111.3	1003.9	961.5	1005.6	937.7
CAFS_HM_T_00018055	529.6	489.6	504.7	495.9	527.6	519.8	522.5	512.5	505
CAFS_HM_T_00016082	2969.9	3141.3	3224.3	3032.6	2986.1	3033.6	3053.8	2787.2	2913.5
CAFS_HM_T_00079021	2812.1	2810.6	2913.1	2783	2919.8	2611.8	2613.4	2764	2604.1
CAFS_HM_T_00028073	2293.9	2750.6	2654.5	2751.5	2365.9	2350.2	2737.3	2023.2	2651.3
CAFS_HM_T_00037591	1513.8	1238.3	1442.2	1532.9	1565.5	1200.2	1362.3	1439.3	1376.7
CAFS_HM_T_00036942	2117.2	2160.8	2164.8	2115.1	2101.3	2275	2076.7	2190.1	2178.7
CAFS_HM_T_00074014	3991.6	3768.3	3938	4130.7	4130.3	3736.2	3709.6	4281.5	4094.7
CAFS_HM_T_00056873	4059.1	4082.9	3993.2	4022.8	4002.3	3719.6	3942.3	3584.7	3836.1
CAFS_HM_T_00034062	2929.1	2859.5	2923.1	2805.9	2960.4	2749.9	2814	2918.6	2908.8
CAFS_HM_T_00074929	1045.9	1147.7	1179.1	1101.9	1071.4	1075.1	888.6	1066.9	1141.9
CAFS_HM_T_00085228	2960	2817.7	2775.3	2861.6	2995.4	2677.8	2731.4	2933.6	2925.7
CAFS_HM_T_00004909	2501	2621.1	2791.7	2642.4	2581.3	3844.5	2477.3	2812.4	2788.6
CAFS_HM_T_00006344	1610.4	1791.1	1693.4	1667.4	1691.2	1751.1	1768.4	1695.7	1764.8
CAFS_HM_T_00079833	1686.9	1768.3	1621.4	1562.6	1532.9	1633.4	1600.6	1552	1552.6
CAFS_HM_T_00028216	2874.1	2650.3	2873.8	2658.2	2789.6	2845.1	2708.4	2795.8	2835.2
CAFS_HM_T_00004612	2499.3	2426.3	2463.3	2518.6	2410.5	2506.7	2435.6	2456.6	2550.9
CAFS_HM_T_00059242	3293.7	3137.4	3343.1	3379.5	3300.2	3273.7	3237	3433.6	3219.9
CAFS_HM_T_00068867	2883.2	2699.2	2963.6	2809.3	2755.1	2699.8	2673.3	2855.2	2891.5
CAFS_HM_T_00020089	3300	3419.1	3365.7	3543.2	3459.4	3100.6	3377	3421.4	3220.6
CAFS_HM_T_00084703	2160.7	1883.5	2113.8	2264.7	2156.3	1956.2	1917	2301.6	2124.7
CAFS_HM_T_00049169	1947.1	1881.8	1940.1	1916	1849.6	1862.1	1835.3	1949.1	1970.2
CAFS_HM_T_00057974	2057.4	1977.1	2058.6	2037.2	2057.5	1978.8	1973.8	2120.4	2089.9
CAFS_HM_T_00034712	789.7	846.6	810.3	787.4	785.5	754.4	762.1	779.4	838.7
CAFS_HM_T_00004178	3761.8	3766.8	3653.5	3739.6	3813.6	3636	3661.3	3754.2	3629.3
CAFS_HM_T_00000550	1800.5	1714.6	1788	1738.2	1789	1724.9	1735.4	1670.5	1710.5
CAFS_HM_T_00007414	1283.8	1265	1261.6	1283	1313.3	1268.6	1347	1298.9	1266.9
CAFS_HM_T_00007028	2454.3	2361.4	2405	2434.8	2489	2332.7	2393.4	2485.2	2520.7
CAFS_HM_T_00008685	3767.5	3685	3553.3	3655.9	3487.2	3644.3	3194.7	3843.9	3724.3
CAFS_HM_T_00022716	2097.2	2260.1	2009.4	2170.5	2351.8	2148.2	2074.3	2191.6	2212
CAFS_HM_T_00005862	1794.5	1705.4	1707.3	1766.9	1764	1748.9	1729.2	1712.4	1737.3
CAFS_HM_T_00080766	29	30.8	32.8	39.2	34.2	23.1	32.6	23.6	36.2
CAFS_HM_T_00052379	2857	2917	3038.9	2891.4	2858.4	2909	2927.6	2994.6	2964.2
CAFS_HM_T_00077100	3385.7	3408.9	3324.3	3280.9	3966.5	3410.8	3958.1	3377.9	3559.2
CAFS_HM_T_00068655	2109.7	1964	2011	2163.4	2136.7	2155.3	2267.8	2077.3	2071.6
CAFS_HM_T_00080849	2138.9	2083.7	2136.3	1953.1	2300.1	2130.4	2078	2327.2	2240.3
CAFS_HM_T_00070268	1572.5	1097.8	1139.7	1510.5	981.8	1858	879	2042.5	2271.1
CAFS_HM_T_00081377	1747.2	1413.3	1823.3	1708.6	1685.6	1608.5	1689.2	1663.7	1733.8
CAFS_HM_T_00063581	2199.3	2059.3	2114.9	2034.1	1985.3	2277.5	2153.3	2063.4	1835.9
CAFS_HM_T_00022599	3698.4	3969.2	3568	3694.5	3644.8	3405.6	3385	3791.3	3590.2
CAFS_HM_T_00051509	171.2	160.4	161.1	168.2	170	162.7	166.7	165.1	176.9
CAFS_HM_T_00082791	1851.3	1762.5	2064	1843.3	1924.9	1937.8	2153.3	1818.3	2095.6
CAFS_HM_T_00059977	1039.8	977	1016.4	974.7	999.1	1053.2	1009.1	1046.3	1046.6
CAFS_HM_T_00036986	2549.2	2507.5	2593.5	2366.5	2430.1	2728.3	2693	2491.5	2544.9
CAFS_HM_T_00043781	3766.6	3616.3	3916.8	3994.8	3956.2	3748.1	3694.6	4163.9	3819.9
CAFS_HM_T_00091939	1154.7	1132.6	1108.1	1169.9	1147.8	1176.3	1183.2	1170.1	1194
CAFS_HM_T_00080714	636.2	589.8	644.4	641.6	631.7	625.8	659.9	663	602.5
CAFS_HM_T_00067320	1734.6	1752.8	1795.6	1868.1	1681.4	1810.4	1838.6	1924.5	1895.1
CAFS_HM_T_00081183	1601.6	1555.6	1541.1	1514.5	1584	1617.7	1663	1561.3	1681.9
CAFS_HM_T_00081621	2268.6	2311.4	2274.7	2245.1	2127.4	2132.7	2078.9	2148.8	2268
CAFS_HM_T_00032931	1688	1596	1641.5	1660.4	1662.9	1481.3	1620.9	2054.3	1648.9
CAFS_HM_T_00069429	3157.2	3228.4	3194	3158.3	3011.9	3120.4	3022.2	3069.2	3253
CAFS_HM_T_00021002	3853.7	3707.3	2880.9	3790.9	3504.7	3646.5	3667.6	3927.4	3807.4
CAFS_HM_T_00071568	3071.6	3010.3	2967.7	2687.4	2935.2	3118.1	3037.7	2773.7	2818.8
CAFS_HM_T_00038668	3753.3	3570.5	3868.3	3784.7	3798.2	3778.6	3778.4	3860.5	3873.4
CAFS_HM_T_00054614	2432.9	2662.9	2346.8	2349.1	2424.3	2622.8	2575.9	2547.5	2648.3
CAFS_HM_T_00034249	2707.8	2761.7	2701.4	2836.5	2775.4	2745.5	2681.8	2917.5	2776.5
CAFS_HM_T_00034080	2695.6	2595.4	2762.4	2639	2730.9	2635.2	2705.3	2826.3	2827.7
CAFS_HM_T_00050106	2925.7	2796.4	2873.1	2963.4	3021.7	2809.2	2823.7	2829	2924
CAFS_HM_T_00053267	1460.2	1469	1474.9	1445.3	1439.8	1361.9	1439.4	1481.5	1425.9
CAFS_HM_T_00034327	2055.1	1912.7	1918.1	2017.3	1938.1	1990.2	1929.4	2031.8	1894.8
CAFS_HM_T_00051148	1330.9	1322.8	1304.2	1468.5	1504.5	1260.4	1336.8	1621.3	1471.5
CAFS_HM_T_00033535	2330.3	2156	2256.9	2353.5	2317.5	2086.9	2054	2350.1	2166.3
CAFS_HM_T_00039989	2627.2	2803.5	2709	2776.5	2884.9	2773.1	2642.5	3035.2	2692.4
CAFS_HM_T_00080422	390.5	320.6	437.8	389.7	351.1	354.6	314.8	386.5	341.5
CAFS_HM_T_00011193	1653.9	1528.9	1654.1	1689.8	1746.3	1522.3	1575.3	1741.4	1625.6
CAFS_HM_T_00029577	2078.4	1979.1	2030.9	2044.4	2104.5	1952.9	2015.6	2134.1	2190.8
CAFS_HM_T_00067071	1314.4	1297.9	1522.7	1369.1	1288.9	1401.4	1343	1338.1	1317.5
CAFS_HM_T_00021066	2459.2	2382.3	2521.5	2437.5	2521	2520.5	2381.3	2568.3	2455.8
CAFS_HM_T_00043814	2234.9	2446	2144.8	2167.6	2151.2	2270.8	2277.2	2176.9	2327.5
CAFS_HM_T_00046939	935.8	842.8	962.4	942.2	921.1	853.4	864.2	956.5	926.7
CAFS_HM_T_00062600	2469.3	2410	2382.2	2425.5	2587.1	2392.7	2432.9	2509.4	2507.3
CAFS_HM_T_00067097	105.5	128.1	108.4	143.8	161.1	165.3	135.4	133.3	156.2
CAFS_HM_T_00088749	3058.5	3169.2	3140.5	3085.7	2948.2	3090.6	2993.2	3045.1	3145.5
CAFS_HM_T_00067532	2847.8	2889	2928.9	2907.7	2952.3	2909.6	2804	2954.6	3079.6
CAFS_HM_T_00067617	1747.7	1705.7	1568.1	1555.7	1570.9	1473.6	1482.4	1644.1	1582.5
CAFS_HM_T_00041469	2602.2	2599.1	2403.8	2513.8	2425.4	2507.3	2434.3	2441.4	2324.2
CAFS_HM_T_00051634	626.7	647.7	634.6	608.5	665.8	580.3	622.6	611.2	573.5
CAFS_HM_T_00036451	2084.4	2142.8	1939.7	2023.2	2054.2	1970	2054.5	2050.5	2077
CAFS_HM_T_00088947	1986.9	1949.4	1976.6	1830.3	1854.4	2018.4	1710.8	2271.3	2009
CAFS_HM_T_00057665	2802.5	2826	2685.2	2662	2806.1	2833.4	2988.5	2788	2817
CAFS_HM_T_00046569	13838.9	13873.9	15478.2	16232.2	13762.5	14398.8	14303.3	14397.7	14236.3
CAFS_HM_T_00065384	1501.1	1440.1	1370.6	1446.8	1464.9	1349.8	1463.8	1441.5	1420.5
CAFS_HM_T_00008270	2427	2588.6	2412	2257.3	2130.9	2156.7	2313	2101.8	2158.3
CAFS_HM_T_00016444	2064.6	2003.3	2150.7	2070	1999.7	2015.6	2039.9	2170.9	2003.3
CAFS_HM_T_00013595	2218.5	1959.6	2134.5	2087.8	1988.4	1940.7	2097	2009.2	2036.4
CAFS_HM_T_00049726	2646.6	2799.7	2713.9	2657.7	2655.4	2648.2	2656.5	2700.2	3009.5
CAFS_HM_T_00040233	1568.3	1692.8	1623.6	1792.4	1843.8	1553.3	1596.5	1707.5	1672.1
CAFS_HM_T_00006578	378.1	402.8	343.5	365.3	404.4	401.6	420.1	381.7	364.3
CAFS_HM_T_00043054	2398.7	1918	1864.1	2216.4	2744.6	1799.8	1917.1	2381.1	2040.6
CAFS_HM_T_00075498	2580.6	2434	2462.4	2714.7	2513.2	2324.6	2511.5	2600.9	2561.9
CAFS_HM_T_00084054	1370.9	1222.8	1396.4	1421.1	1401.1	1243.5	1324	1420.7	1315.1
CAFS_HM_T_00042301	1149.9	1251.8	1168.9	1140.9	1204	1210.5	1232.7	1100.9	1231.6
CAFS_HM_T_00062228	2565.4	2524.3	2625.3	2696.6	2669.9	2494.7	2471.6	2719.1	2625.2
CAFS_HM_T_00025150	2205.3	2066.4	2356.2	2258.2	2234.4	2216.7	2187.7	2380.7	2210.6
CAFS_HM_T_00041049	2789.1	2654.8	2620.7	2741.2	2777.4	2703.6	2650.6	2735.5	2704.1
CAFS_HM_T_00089758	310.8	349.9	318.6	392.9	322.2	302.2	317	313.5	314.7
CAFS_HM_T_00042865	1334.5	1292.9	1346.3	1376.2	1367.9	1235.2	1265.3	1411.8	1347
CAFS_HM_T_00074234	2079.8	2196.5	2017.1	2178.7	2110.1	1969.6	2005.1	2034.1	1996.9
CAFS_HM_T_00084171	1603.1	1605.1	1604.6	1644.8	1669.5	1596.4	1624.7	1790.7	1732.1
CAFS_HM_T_00027158	2582.9	2707.7	2488.3	2475.5	2467.5	2555.2	2462.4	2403.3	2399
CAFS_HM_T_00049501	2788.6	2634.2	2624.9	2643.4	2817.8	2518.8	2676.2	2682	2703.7
CAFS_HM_T_00045348	1769.6	1717.6	1698.1	1838.7	1753.9	1737.3	1701.1	1766.1	1763.1
CAFS_HM_T_00007742	3448.8	3054.8	3898.4	3397.5	3328.1	3473.7	2959.7	3848.2	3476.3
CAFS_HM_T_00046216	2317.7	2242.9	2230.7	2260.1	2307.1	2181.6	2217.5	2322.4	2251
CAFS_HM_T_00033904	1949.8	1656.8	1719.1	1711	1818.6	1677.7	1553.2	1770.3	1638.7
CAFS_HM_T_00058389	2601	2739	2536.4	2509.9	2599.3	2451.4	2594.5	2498.8	2548.5
CAFS_HM_T_00026281	1271.3	1193.2	1399.4	1280.1	1305.3	1264.5	1298.1	1307.3	1289.4
CAFS_HM_T_00063446	765.4	814.4	694.1	763.7	694.2	832.7	697.6	764.9	930.6
CAFS_HM_T_00037855	2366.7	2669.1	2534.8	2671.8	2493.6	2337.4	2574.5	2170.1	2476.4
CAFS_HM_T_00031276	2055.3	2062	2060.2	2118.2	2110.6	2065.8	1998.9	2083.5	1984.9
CAFS_HM_T_00071720	1839	1810.5	1892.7	1745.7	1792.4	1930.4	1924.6	1805.3	1854.5
CAFS_HM_T_00036845	1325.1	1313.6	1408.9	1423.3	1396	1362.6	1265.4	1479	1388
CAFS_HM_T_00009377	2232.5	2176.7	2279.8	2295.5	2248.8	2250	2141.1	2217.3	2200.3
CAFS_HM_T_00045393	2586.9	2475.5	2614.8	2458.2	2406.3	2469	2504.2	2481.9	2555.8
CAFS_HM_T_00074581	1321.9	1278.2	1242.6	1310.9	1319.3	1247.2	1319.9	1356.4	1374.3
CAFS_HM_T_00082173	1532.9	1508.6	1436.3	1670.4	1976.9	1588.3	1596.9	1899.8	1707.2
CAFS_HM_T_00073685	2642.9	2728.7	2603.2	2645.3	2723.3	2791.4	2838.8	2609.5	2660.7
CAFS_HM_T_00087354	2399.3	2661.9	2298.2	2692	2816.4	2448	2542.9	2960.1	2661.4
CAFS_HM_T_00077349	739.2	735.6	725.1	761.4	795.9	776.8	744	782.6	754.2
CAFS_HM_T_00073611	1423	1309.9	1357.7	1442.6	1356.4	1274.8	1349.4	1382.1	1333.9
CAFS_HM_T_00057997	1266.3	1294.6	1306.5	1213.2	1201.3	1190.8	1107.6	1187.7	1244.1
CAFS_HM_T_00033764	2512.4	2459.8	2354.5	2373.7	2502.4	2233.6	2337.4	2548.9	2379.5
CAFS_HM_T_00016582	2721.5	2571.8	2731.1	2718	2772.8	2634.1	2509.5	2815.9	2656.2
CAFS_HM_T_00011742	2191.6	2303	2253.1	2123.8	2085.6	2111.9	1998	2120	1995.6
CAFS_HM_T_00086072	2440.2	2542.6	2606.2	2539.2	2499.1	2729.1	2565.3	2556.6	2596.1
CAFS_HM_T_00008400	1951.5	1956.7	1995.8	1916.5	1866.6	1999.3	2004.1	1809.1	1912.7
CAFS_HM_T_00021212	4126.1	3769.9	3832.2	3755	3871	3964.2	3932.7	3654	3657
CAFS_HM_T_00042807	3680.7	3802.4	3620.2	3738.3	3755.1	3505.2	3681.6	3855.8	3661.4
CAFS_HM_T_00027612	4075.6	3863.7	4319.3	4153.4	3908.7	4182.3	3930.8	4123	3894.1
CAFS_HM_T_00009332	3033.5	3115.2	2756.5	2734.8	2537.1	2985.5	2891.7	2470.2	2642.8
CAFS_HM_T_00076215	1013.7	1129.9	1039.6	1106.1	1071.3	1122.6	1114.2	1059.7	1077.2
CAFS_HM_T_00062928	2415	2267.7	2344.3	2412.5	2285	2178.1	2222.1	2515.8	2281.6
CAFS_HM_T_00062656	1681.9	1730.3	1704.4	2072.4	2215.4	1688.9	1942.8	2436.3	2032.7
CAFS_HM_T_00068503	1647.1	1934.2	1747.8	2036.6	2910	1704.9	2132.8	1824.1	1772.4
CAFS_HM_T_00072939	3913.8	3707	3725.3	3844.7	3914.5	3562.6	3740.5	3850.6	3876.8
CAFS_HM_T_00038843	941	884.4	862	953.7	1011	850.2	972.5	860.6	881.6
CAFS_HM_T_00050053	2175.6	2194	2202	2245.4	2333.8	2265.5	2145.2	2363.5	2270.2
CAFS_HM_T_00028145	2051.1	2241.7	2006.7	2004.6	2028.3	2099	2187.1	1886.7	2063.4
CAFS_HM_T_00003795	2501.3	2551.9	2441.3	2533	2665.9	2442.1	2492.3	2528.3	2484.3
CAFS_HM_T_00031912	2779.2	2840.6	2752.8	2845.5	2825.8	2721.9	2780	2779.7	2862.6
CAFS_HM_T_00090002	3021.1	2856.5	3098.2	2713.9	2428	2901.4	2718.1	2746.9	2592.2
CAFS_HM_T_00086451	2306.7	2374.3	2388.8	2380.5	2379.9	2384.5	2525.7	2374.7	2200.5
CAFS_HM_T_00041807	3525.4	3283.7	3490.5	3390.6	3400	3250	3468.6	3397	3327.6
CAFS_HM_T_00013802	2447.4	2540.4	2458.3	2485.6	2503.7	2504.4	2486.7	2507.4	2483.4
CAFS_HM_T_00054880	2437	2291.6	2484	2742.4	2971.6	2399.1	2431.6	3004.9	2658
CAFS_HM_T_00042621	849.1	870	844.5	865.8	863.8	901.3	847.6	904.2	1018
CAFS_HM_T_00082678	1572.2	1551.6	1589.9	1635.8	1553.8	1607.4	1587.7	1624.8	1643.6
CAFS_HM_T_00032624	1261.8	1160.5	1595.4	1294.5	1288.3	1524.2	1442.2	1280.8	1422.3
CAFS_HM_T_00060353	2608.2	2602.3	2581.8	2635.7	2615.6	2468.6	2522	2805.3	2616.2
CAFS_HM_T_00027887	2088.7	1896.6	1983.4	2054	2006.6	1899.3	1881.8	2059.6	1899.5
CAFS_HM_T_00091274	2815.3	2662.1	2903.9	2992.3	2925.9	2790.7	2694.8	3095.9	2897.2
CAFS_HM_T_00030573	1576.2	1735.7	1700.4	1754.4	1806.5	1756.9	1685.8	1831.9	1710.4
CAFS_HM_T_00007071	3213.9	3252.6	3171	3068.3	3176.9	3171.5	3374.6	2994.2	3367
CAFS_HM_T_00011481	231.7	211.7	233.6	206.6	229.9	222.6	237.5	225	243.8
CAFS_HM_T_00032332	1777	1809.5	1474	2068.9	2056.2	1684.7	1614	1967.3	1705.6
CAFS_HM_T_00033012	1988.2	1961	2039.2	1992.1	2114.5	1911.3	2062.8	2021.1	1996.6
CAFS_HM_T_00049093	2282.9	2320.3	2243.4	2308.9	2268.2	2182.7	2273.4	2366.3	2294.2
CAFS_HM_T_00071613	2476.9	2449.6	2526.1	2500.9	2577.6	2489.7	2626.6	2388.3	2563.9
CAFS_HM_T_00080541	3421.5	3564.5	3277.5	3262.7	3378.3	3204.6	3325.8	3191.3	3197.8
CAFS_HM_T_00000614	1888.5	1711.2	1808.3	1840.2	2022.6	1658.4	1699.2	1832.3	1915
CAFS_HM_T_00005721	4308.5	4182.4	4233.4	4250.8	4272.9	4118.5	4296.8	4188.7	4279.3
CAFS_HM_T_00013385	3876.6	3497.8	3789.6	3811.9	3717.3	3595.7	3780.5	3992.4	3802.9
CAFS_HM_T_00035644	1833.1	1807.9	1767.8	1840.4	1866.2	1902.1	1860.3	1766.1	1858.8
CAFS_HM_T_00029421	3064.9	3172.7	2407.5	2783.7	2023.8	3834.2	3225.8	2447.2	2898.9
CAFS_HM_T_00081590	347.3	307.9	354.8	319	358.6	322.9	336.5	357.7	337.8
CAFS_HM_T_00016811	1939.6	1878.8	1904.8	1904.1	1946.7	1940.2	1868.4	1885.4	1990.5
CAFS_HM_T_00056507	3070.7	3012.5	3163.6	3196.6	3210.9	2995.5	3247.6	3134	3240.6
CAFS_HM_T_00061256	1274.7	1244.4	1294.6	1205.1	1231.3	1153.1	1239.1	1213.7	1211.9
CAFS_HM_T_00048672	2018.6	2095.5	2038.5	2118.1	2164.6	1999.1	2161.9	2348.8	1830.8
CAFS_HM_T_00013438	709.4	759	684.2	871.7	753.8	6350	793.9	1100.2	730.8
CAFS_HM_T_00036477	4718.1	5518.8	4553.4	5157.9	4849.7	4856.8	4913.4	4793.3	4817.5
CAFS_HM_T_00059559	770.4	718.9	751.2	802.4	768.8	739	728.4	778.7	731.2
CAFS_HM_T_00047334	1045.9	1058.4	1001.3	926.1	886.3	958.7	928	909.7	1046.9
CAFS_HM_T_00023185	2523.3	2609	2574.7	2542.3	2604.7	2586.1	2491.7	2538.8	2472.4
CAFS_HM_T_00084565	1816.4	2010.4	1889.9	1992.9	1964	2169.5	2186.8	2015.9	2181.4
CAFS_HM_T_00006560	229.2	223.1	266	253.6	228.2	247.6	249.2	215.7	211.8
CAFS_HM_T_00007772	2184	2223.3	2230.1	2124.2	2026.5	2233.1	2078	2002.7	2092.2
CAFS_HM_T_00052415	3349.4	3155.5	3196	3240.3	3107.9	3150.9	3106.3	3392.5	3168.6
CAFS_HM_T_00022405	2310.5	2037.5	2223.4	2059.6	2118.2	2270.6	2181.6	2057.5	2235.6
CAFS_HM_T_00052356	2010.2	1966	2060.3	2017.5	2059.7	1943.6	2087.3	2016.2	2026.5
CAFS_HM_T_00031881	1931	1704.3	2042.6	1875	2166.7	2268.2	1924.2	2178.8	2171.8
CAFS_HM_T_00028967	1907.5	1868.8	1771.8	1896.2	1782.2	2018.1	1800.5	1922.2	1939.5
CAFS_HM_T_00010280	1750.6	1963.2	1685.2	1633.2	1623.3	1985.4	2022	1690.8	1798.8
CAFS_HM_T_00060998	2057.2	1995.4	2066	2037.7	2020.5	1976.5	2061.7	2037.8	2029.9
CAFS_HM_T_00059317	3589.1	3534.4	3231.3	3456.2	3311.5	3297.1	3317.2	3375.1	3194.4
CAFS_HM_T_00090088	2688.1	2825.4	2720.4	2625.4	2868.9	2657.6	2746.6	2616.6	2712.4
CAFS_HM_T_00050789	2198.7	2086.5	2122.3	2247.7	2376.2	2104.9	2181.5	2264.5	2180
CAFS_HM_T_00030553	1634.4	1508.4	1686.1	1617.1	1629.9	1646.7	1633.9	1709	1584.4
CAFS_HM_T_00006023	1228.3	1235	1246.4	1238.8	1253.8	1172.6	1148.8	1198.8	1204.4
CAFS_HM_T_00079159	5781.6	5549.1	5340	4843.2	4968.5	5162.2	5498.2	4874.8	4990.3
CAFS_HM_T_00078927	1510.7	1488.7	1640.3	1651	1596.8	1464.2	1469.6	1612.6	1564.5
CAFS_HM_T_00085776	1442.1	1477.8	1413.4	1287.4	1375.2	1477.6	1401.2	1329.7	1405.5
CAFS_HM_T_00015573	1696.6	1594.4	1634.3	1487.5	1365.8	1717.8	1443	1617.9	1695.4
CAFS_HM_T_00028854	8909.7	10264.7	9240.1	8834.9	8879.1	10152.1	10405.8	8513.5	9470.2
CAFS_HM_T_00073412	2680.5	2866.7	2582.7	2845.5	2842.6	2817.5	2676.4	2764.2	2765.9
CAFS_HM_T_00087737	1839.3	1934.6	1901.6	1835.4	1877.3	1856.9	1880.3	1699.8	1757.8
CAFS_HM_T_00076108	907.3	972.6	831.1	952.1	839.9	777.1	724	939.3	823
CAFS_HM_T_00011027	1671	1786.6	1520.7	1455.6	1553.5	1641.1	1722.5	1556.4	1555.8
CAFS_HM_T_00047833	3482.1	3699	3354.7	3330.5	3305.6	3589.2	3844.2	3348	3675.3
CAFS_HM_T_00023274	2238.5	2011	2128.4	2038.7	2040.9	2100	2078.9	1982	2040.7
CAFS_HM_T_00036021	795.2	781.8	783.1	781.7	808.8	747.8	797.8	817.7	764
CAFS_HM_T_00085217	74.3	83.1	82.7	92.4	85.9	84.7	85.3	95.3	92.6
CAFS_HM_T_00044146	1028.2	1093.4	952.8	1062.3	1104.4	999.8	1035.6	1167	1072
CAFS_HM_T_00076189	2670.2	2442.2	2776.4	2738.1	2799	2463.1	2647.6	2728.7	2652.7
CAFS_HM_T_00067443	2831.8	2834.9	2676.1	2770.2	2767.7	2717.3	2710.1	2694.5	2690.5
CAFS_HM_T_00065807	3289.6	3503.4	3120.4	3292.2	3217.9	3629	3457.6	3262	3457.8
CAFS_HM_T_00035362	2515.9	2424.9	2537	2558.8	2552.9	2431.8	2374	2680.4	2513.5
CAFS_HM_T_00014640	2044.1	2007.9	2113.8	2151.2	2123.1	2091.4	1996.6	2197.1	2084.1
CAFS_HM_T_00088045	2863.2	2905.7	2916.5	2866.1	2982.4	2803.3	2853.1	3015.2	2980.2
CAFS_HM_T_00049002	2840.5	2904.9	2875.2	2875	2919.1	2911.4	2851	2841	2901.4
CAFS_HM_T_00046121	1742.1	1854.8	1984.8	1746.4	1701.9	1958	1941.9	1796.3	1861.4
CAFS_HM_T_00027576	961.7	1048.9	954.8	1021.6	1107.1	949.8	1023	1101.4	1035.6
CAFS_HM_T_00059476	4309.4	4200	4631.3	3228.8	3528.3	4882.9	4436.4	3049.5	3756.9
CAFS_HM_T_00074089	3832.4	3630.3	3915	3673.3	3718.8	3805.6	3549.7	3693.3	3674.3
CAFS_HM_T_00077881	2114	2117.6	2215	2164.3	2104.6	2156.4	2163	2122.5	2190.2
CAFS_HM_T_00063326	2199.6	2180	2064.5	2067.2	2042.8	2020.3	2092.9	1915.2	2004.8
CAFS_HM_T_00019438	323.9	301.4	297.5	297.1	279.4	327.7	295.7	334.2	323.1
CAFS_HM_T_00036925	1382.9	1420.4	1501.8	1762.4	1975	1501.4	1729.7	1959.6	1758.3
CAFS_HM_T_00052939	633.8	689.1	616.5	698	674.4	653.1	657.9	635.7	641.6
CAFS_HM_T_00071407	3959.7	3772	4005.4	3882.6	3781.6	3690.9	3807.3	3853.1	3721.6
CAFS_HM_T_00041274	2253.8	2151.2	2167.4	2194.1	2287.4	2188.9	2153.5	2230.7	2198.2
CAFS_HM_T_00064915	1530.9	1437.2	1504.3	1450.9	1435.1	1441.1	1418.5	1457.9	1467.1
CAFS_HM_T_00038596	3664	3653.4	4041.2	3737.9	3916	3897	4023.3	3855.7	3944.3
CAFS_HM_T_00044873	2448.2	2432.1	2559.9	2410	2552.8	2429.2	2323.2	2461.6	2441.1
CAFS_HM_T_00066111	2504.4	2601.5	2512.7	2425.7	2360.1	2666.3	2570.8	2484.6	2627.1
CAFS_HM_T_00088288	505	687.7	422.9	688.9	785	513.9	458.4	669.3	537.2
CAFS_HM_T_00077702	2404.6	2279.9	2472	2422.7	2492.7	2462.4	2473.6	2370.2	2424.5
CAFS_HM_T_00035408	1541.7	1571.5	1664.1	1635.5	1738.6	1778.3	1661.9	1672.4	1681.3
CAFS_HM_T_00062851	1736.1	1727.8	1753.4	1723.4	1712.4	1635.9	1635.1	1823.5	1734.3
CAFS_HM_T_00068850	2009.2	1858.7	2273	2147.2	2091.7	1947.5	1938	2176.3	1895.9
CAFS_HM_T_00089954	4571.4	5013.7	4549.1	4735.5	4592.4	4624	4662.8	4836.8	4649.4
CAFS_HM_T_00035312	2685.6	2761.6	2433.2	2334.3	2381.4	2517.5	2574.9	2328.2	2508.8
CAFS_HM_T_00036785	2066	2043.3	1882.7	1894.2	1930.5	2009.4	1972.6	1874.4	1977.8
CAFS_HM_T_00013467	2218.1	2170.9	2079.5	2114.6	1958.2	1988.4	2070.4	1919.6	1975
CAFS_HM_T_00045282	1885	1930.6	1868.4	1845.8	1826.4	1829.5	1839.4	1756.6	1800
CAFS_HM_T_00071730	2793.1	2784.7	2854.3	2910.1	2967.3	2726.2	2760.6	2921.5	2815
CAFS_HM_T_00041749	487.7	488.8	499.5	562	508.3	447.6	469.6	473.4	468
CAFS_HM_T_00091304	1166	1156.3	1219.5	1184.1	1199.4	1131	1188.2	1174	1214
CAFS_HM_T_00071297	1109.5	1026.7	1099.9	1146	1160.2	1077.5	1053.4	1146.7	1070.6
CAFS_HM_T_00067610	2598.7	2517.6	2494.4	2567.7	2585.3	2376.9	2476.4	2657.1	2516.1
CAFS_HM_T_00043065	1478.6	1317.7	1270.5	1255.6	1405	1270.5	1440.9	1401.3	1561.9
CAFS_HM_T_00003358	1856.5	1738.8	2012.8	1864	1732.3	1679.4	1592.4	1936.1	1701
[truncated: 6,355 more rows]
