# Supplementary material for: Tandem Mass Tagging-Based Quantitative Proteomics Analysis Reveals Damage to the Liver and Brain of Hypophthalmichthys molitrix Exposed to Acute Hypoxia and Reoxygenation
Source: Antioxidants (Basel). 2022 Mar 19;11(3):589. doi: 10.3390/antiox11030589 (PMC8945220; doi:10.3390/antiox11030589)
Supplement: Supplementary file 1 [file antioxidants-11-00589-s001.zip › Table S4.xls]

## Sheet: GO_anno
GO annotation of total quantified proteins in liver.
Protein	GO_NUM	GO_Description
CAFS_HM_T_00043379	2	Biological Process:biosynthetic process (GO:0009058),Biological Process:oxidation-reduction process (GO:0055114)
CAFS_HM_T_00033529	2	Molecular Function:lipid transporter activity (GO:0005319),Biological Process:lipid transport (GO:0006869)
CAFS_HM_T_00052219	2	Molecular Function:calcium ion binding (GO:0005509),Molecular Function:protein binding (GO:0005515)
CAFS_HM_T_00091449	5	Molecular Function:microtubule motor activity (GO:0003777),Molecular Function:ATP binding (GO:0005524),Biological Process:microtubule-based movement (GO:0007018),Molecular Function:ATPase activity (GO:0016887),Cellular Component:dynein complex (GO:0030286)
CAFS_HM_T_00066111	2	Molecular Function:protein binding (GO:0005515),Biological Process:regulation of GTPase activity (GO:0043087)
CAFS_HM_T_00056393	1	Molecular Function:protein binding (GO:0005515)
CAFS_HM_T_00065840	1	Molecular Function:protein binding (GO:0005515)
CAFS_HM_T_00020544	2	Biological Process:carbohydrate metabolic process (GO:0005975),Molecular Function:glycogen phosphorylase activity (GO:0008184)
CAFS_HM_T_00016615	3	Molecular Function:motor activity (GO:0003774),Molecular Function:ATP binding (GO:0005524),Cellular Component:myosin complex (GO:0016459)
CAFS_HM_T_00075212	--	--
CAFS_HM_T_00006824	4	Cellular Component:ruffle (GO:0001726),Molecular Function:structural constituent of cytoskeleton (GO:0005200),Cellular Component:focal adhesion (GO:0005925),Biological Process:cytoskeletal anchoring at plasma membrane (GO:0007016)
CAFS_HM_T_00007488	5	Molecular Function:structural molecule activity (GO:0005198),Biological Process:intracellular protein transport (GO:0006886),Biological Process:vesicle-mediated transport (GO:0016192),Cellular Component:clathrin coat of trans-Golgi network vesicle (GO:0030130),Cellular Component:clathrin coat of coated pit (GO:0030132)
CAFS_HM_T_00002604	4	Molecular Function:motor activity (GO:0003774),Molecular Function:protein binding (GO:0005515),Molecular Function:ATP binding (GO:0005524),Cellular Component:myosin complex (GO:0016459)
CAFS_HM_T_00082002	1	Cellular Component:cytoskeleton (GO:0005856)
CAFS_HM_T_00069903	3	Molecular Function:endopeptidase inhibitor activity (GO:0004866),Cellular Component:extracellular region (GO:0005576),Cellular Component:extracellular space (GO:0005615)
CAFS_HM_T_00016898	4	Biological Process:metabolic process (GO:0008152),Biological Process:biosynthetic process (GO:0009058),Molecular Function:oxidoreductase activity (GO:0016491),Biological Process:oxidation-reduction process (GO:0055114)
CAFS_HM_T_00020688	2	Biological Process:protein transport (GO:0015031),Cellular Component:integral component of endoplasmic reticulum membrane (GO:0030176)
CAFS_HM_T_00018962	1	Molecular Function:RNA binding (GO:0003723)
CAFS_HM_T_00091029	6	Molecular Function:catalytic activity (GO:0003824),Molecular Function:formate-tetrahydrofolate ligase activity (GO:0004329),Molecular Function:methylenetetrahydrofolate dehydrogenase (NADP+) activity (GO:0004488),Molecular Function:ATP binding (GO:0005524),Biological Process:folic acid-containing compound biosynthetic process (GO:0009396),Biological Process:oxidation-reduction process (GO:0055114)
CAFS_HM_T_00077351	3	Cellular Component:cytoplasm (GO:0005737),Molecular Function:oxidoreductase activity (GO:0016491),Biological Process:oxidation-reduction process (GO:0055114)
CAFS_HM_T_00008668	5	Molecular Function:electron carrier activity (GO:0009055),Molecular Function:oxidoreductase activity (GO:0016491),Molecular Function:metal ion binding (GO:0046872),Molecular Function:iron-sulfur cluster binding (GO:0051536),Biological Process:oxidation-reduction process (GO:0055114)
CAFS_HM_T_00069913	3	Molecular Function:endopeptidase inhibitor activity (GO:0004866),Cellular Component:extracellular region (GO:0005576),Cellular Component:extracellular space (GO:0005615)
CAFS_HM_T_00068886	3	Molecular Function:acetyl-CoA carboxylase activity (GO:0003989),Molecular Function:ATP binding (GO:0005524),Biological Process:fatty acid biosynthetic process (GO:0006633)
CAFS_HM_T_00008672	5	Molecular Function:electron carrier activity (GO:0009055),Molecular Function:oxidoreductase activity (GO:0016491),Molecular Function:metal ion binding (GO:0046872),Molecular Function:iron-sulfur cluster binding (GO:0051536),Biological Process:oxidation-reduction process (GO:0055114)
CAFS_HM_T_00007003	2	Molecular Function:oxidoreductase activity (GO:0016491),Biological Process:oxidation-reduction process (GO:0055114)
CAFS_HM_T_00038448	1	Molecular Function:protein binding (GO:0005515)
CAFS_HM_T_00001240	2	Molecular Function:oxidoreductase activity (GO:0016491),Biological Process:oxidation-reduction process (GO:0055114)
CAFS_HM_T_00086417	5	Molecular Function:structural molecule activity (GO:0005198),Biological Process:intracellular protein transport (GO:0006886),Biological Process:vesicle-mediated transport (GO:0016192),Cellular Component:clathrin coat of trans-Golgi network vesicle (GO:0030130),Cellular Component:clathrin coat of coated pit (GO:0030132)
CAFS_HM_T_00066950	3	Biological Process:metabolic process (GO:0008152),Molecular Function:oxidoreductase activity (GO:0016491),Biological Process:oxidation-reduction process (GO:0055114)
CAFS_HM_T_00087005	2	Molecular Function:calcium ion binding (GO:0005509),Molecular Function:protein binding (GO:0005515)
CAFS_HM_T_00058021	1	Molecular Function:protein binding (GO:0005515)
CAFS_HM_T_00025415	4	Molecular Function:ATP binding (GO:0005524),Biological Process:protein folding (GO:0006457),Biological Process:response to stress (GO:0006950),Molecular Function:unfolded protein binding (GO:0051082)
CAFS_HM_T_00053889	3	Molecular Function:ATP binding (GO:0005524),Biological Process:proton transport (GO:0015992),Biological Process:ATP metabolic process (GO:0046034)
CAFS_HM_T_00059889	3	Molecular Function:phosphoenolpyruvate carboxykinase activity (GO:0004611),Molecular Function:GTP binding (GO:0005525),Biological Process:gluconeogenesis (GO:0006094)
CAFS_HM_T_00073885	--	--
CAFS_HM_T_00056851	1	Molecular Function:protein binding (GO:0005515)
CAFS_HM_T_00005153	2	Biological Process:protein transport (GO:0015031),Cellular Component:integral component of endoplasmic reticulum membrane (GO:0030176)
CAFS_HM_T_00071979	3	Molecular Function:endopeptidase inhibitor activity (GO:0004866),Cellular Component:extracellular region (GO:0005576),Cellular Component:extracellular space (GO:0005615)
CAFS_HM_T_00037723	3	Biological Process:metabolic process (GO:0008152),Molecular Function:oxidoreductase activity (GO:0016491),Biological Process:oxidation-reduction process (GO:0055114)
CAFS_HM_T_00040139	1	Biological Process:metabolic process (GO:0008152)
CAFS_HM_T_00001368	--	--
CAFS_HM_T_00062807	3	Molecular Function:catalase activity (GO:0004096),Molecular Function:heme binding (GO:0020037),Biological Process:oxidation-reduction process (GO:0055114)
CAFS_HM_T_00058972	--	--
CAFS_HM_T_00021537	1	Biological Process:oxidation-reduction process (GO:0055114)
CAFS_HM_T_00070529	2	Biological Process:metabolic process (GO:0008152),Molecular Function:uridylyltransferase activity (GO:0070569)
CAFS_HM_T_00090940	8	Molecular Function:nucleotide binding (GO:0000166),Molecular Function:aminoacyl-tRNA ligase activity (GO:0004812),Molecular Function:proline-tRNA ligase activity (GO:0004827),Molecular Function:ATP binding (GO:0005524),Cellular Component:cytoplasm (GO:0005737),Biological Process:tRNA aminoacylation for protein translation (GO:0006418),Biological Process:prolyl-tRNA aminoacylation (GO:0006433),Bio…
CAFS_HM_T_00051391	2	Molecular Function:phosphoglycerate kinase activity (GO:0004618),Biological Process:glycolytic process (GO:0006096)
CAFS_HM_T_00028012	1	Molecular Function:GTP binding (GO:0005525)
CAFS_HM_T_00008690	5	Molecular Function:catalytic activity (GO:0003824),Molecular Function:folic acid binding (GO:0005542),Biological Process:metabolic process (GO:0008152),Molecular Function:transferase activity (GO:0016740),Biological Process:cellular metabolic process (GO:0044237)
CAFS_HM_T_00024150	--	--
CAFS_HM_T_00017823	3	Molecular Function:adenosylhomocysteinase activity (GO:0004013),Biological Process:S-adenosylhomocysteine catabolic process (GO:0019510),Molecular Function:NAD binding (GO:0051287)
CAFS_HM_T_00056689	1	Molecular Function:ubiquitin-protein transferase activity (GO:0004842)
CAFS_HM_T_00060981	4	Molecular Function:homogentisate 1,2-dioxygenase activity (GO:0004411),Biological Process:L-phenylalanine catabolic process (GO:0006559),Biological Process:tyrosine metabolic process (GO:0006570),Biological Process:oxidation-reduction process (GO:0055114)
CAFS_HM_T_00062164	2	Molecular Function:oxidoreductase activity (GO:0016491),Biological Process:oxidation-reduction process (GO:0055114)
CAFS_HM_T_00057299	1	Molecular Function:small protein activating enzyme activity (GO:0008641)
CAFS_HM_T_00015632	3	Molecular Function:catalytic activity (GO:0003824),Biological Process:metabolic process (GO:0008152),Molecular Function:cofactor binding (GO:0048037)
CAFS_HM_T_00073307	--	--
CAFS_HM_T_00065957	1	Molecular Function:ATP binding (GO:0005524)
CAFS_HM_T_00067579	3	Molecular Function:motor activity (GO:0003774),Molecular Function:ATP binding (GO:0005524),Cellular Component:myosin complex (GO:0016459)
CAFS_HM_T_00076966	2	Biological Process:biosynthetic process (GO:0009058),Molecular Function:pyridoxal phosphate binding (GO:0030170)
CAFS_HM_T_00004550	--	--
CAFS_HM_T_00069911	3	Molecular Function:endopeptidase inhibitor activity (GO:0004866),Cellular Component:extracellular region (GO:0005576),Cellular Component:extracellular space (GO:0005615)
CAFS_HM_T_00013725	2	Molecular Function:transaminase activity (GO:0008483),Molecular Function:pyridoxal phosphate binding (GO:0030170)
CAFS_HM_T_00052961	1	Molecular Function:protein binding (GO:0005515)
CAFS_HM_T_00069365	--	--
CAFS_HM_T_00069909	1	Molecular Function:endopeptidase inhibitor activity (GO:0004866)
CAFS_HM_T_00091877	2	Biological Process:carbohydrate metabolic process (GO:0005975),Molecular Function:glycogen phosphorylase activity (GO:0008184)
CAFS_HM_T_00073631	--	--
CAFS_HM_T_00031810	1	Biological Process:metabolic process (GO:0008152)
CAFS_HM_T_00067042	--	--
CAFS_HM_T_00031182	1	Molecular Function:protein binding (GO:0005515)
CAFS_HM_T_00088194	--	--
CAFS_HM_T_00068655	5	Molecular Function:glycine dehydrogenase (decarboxylating) activity (GO:0004375),Biological Process:cellular amino acid metabolic process (GO:0006520),Biological Process:glycine catabolic process (GO:0006546),Molecular Function:lyase activity (GO:0016829),Biological Process:oxidation-reduction process (GO:0055114)
CAFS_HM_T_00041145	2	Molecular Function:flavin adenine dinucleotide binding (GO:0050660),Biological Process:oxidation-reduction process (GO:0055114)
CAFS_HM_T_00053890	5	Molecular Function:ATP binding (GO:0005524),Biological Process:transport (GO:0006810),Cellular Component:integral component of membrane (GO:0016021),Molecular Function:ATPase activity (GO:0016887),Biological Process:transmembrane transport (GO:0055085)
CAFS_HM_T_00031096	2	Molecular Function:protein binding (GO:0005515),Cellular Component:cytoskeleton (GO:0005856)
CAFS_HM_T_00076215	2	Molecular Function:oxidoreductase activity (GO:0016491),Biological Process:oxidation-reduction process (GO:0055114)
CAFS_HM_T_00008248	4	Molecular Function:calcium-dependent cysteine-type endopeptidase activity (GO:0004198),Molecular Function:calcium ion binding (GO:0005509),Cellular Component:intracellular (GO:0005622),Biological Process:proteolysis (GO:0006508)
CAFS_HM_T_00078205	2	Molecular Function:UDP-glucose:glycoprotein glucosyltransferase activity (GO:0003980),Biological Process:protein glycosylation (GO:0006486)
CAFS_HM_T_00028830	2	Molecular Function:protein binding (GO:0005515),Cellular Component:cytoskeleton (GO:0005856)
CAFS_HM_T_00092258	3	Biological Process:metabolic process (GO:0008152),Molecular Function:oxidoreductase activity (GO:0016491),Biological Process:oxidation-reduction process (GO:0055114)
CAFS_HM_T_00083690	4	Molecular Function:magnesium ion binding (GO:0000287),Molecular Function:pyruvate kinase activity (GO:0004743),Biological Process:glycolytic process (GO:0006096),Molecular Function:potassium ion binding (GO:0030955)
CAFS_HM_T_00016955	1	Biological Process:cell redox homeostasis (GO:0045454)
CAFS_HM_T_00032924	4	Molecular Function:ATP binding (GO:0005524),Biological Process:protein folding (GO:0006457),Biological Process:response to stress (GO:0006950),Molecular Function:unfolded protein binding (GO:0051082)
CAFS_HM_T_00074112	4	Molecular Function:calcium ion binding (GO:0005509),Cellular Component:endoplasmic reticulum (GO:0005783),Biological Process:protein folding (GO:0006457),Molecular Function:unfolded protein binding (GO:0051082)
CAFS_HM_T_00089476	--	--
CAFS_HM_T_00067593	3	Molecular Function:motor activity (GO:0003774),Molecular Function:ATP binding (GO:0005524),Cellular Component:myosin complex (GO:0016459)
CAFS_HM_T_00036477	2	Molecular Function:fructose-bisphosphate aldolase activity (GO:0004332),Biological Process:glycolytic process (GO:0006096)
CAFS_HM_T_00090889	6	Molecular Function:catalytic activity (GO:0003824),Molecular Function:3-hydroxyacyl-CoA dehydrogenase activity (GO:0003857),Biological Process:fatty acid metabolic process (GO:0006631),Biological Process:metabolic process (GO:0008152),Molecular Function:oxidoreductase activity (GO:0016491),Biological Process:oxidation-reduction process (GO:0055114)
CAFS_HM_T_00045305	2	Molecular Function:protein binding (GO:0005515),Cellular Component:integral component of membrane (GO:0016021)
CAFS_HM_T_00037540	--	--
CAFS_HM_T_00054669	3	Biological Process:metabolic process (GO:0008152),Molecular Function:oxidoreductase activity (GO:0016491),Biological Process:oxidation-reduction process (GO:0055114)
CAFS_HM_T_00071211	2	Molecular Function:protein binding (GO:0005515),Cellular Component:extracellular region (GO:0005576)
CAFS_HM_T_00065717	--	--
CAFS_HM_T_00085816	3	Molecular Function:iron ion binding (GO:0005506),Molecular Function:heme binding (GO:0020037),Biological Process:oxidation-reduction process (GO:0055114)
CAFS_HM_T_00043005	2	Biological Process:cell adhesion (GO:0007155),Molecular Function:actin filament binding (GO:0051015)
CAFS_HM_T_00075861	6	Molecular Function:structural molecule activity (GO:0005198),Molecular Function:protein binding (GO:0005515),Biological Process:intracellular protein transport (GO:0006886),Biological Process:vesicle-mediated transport (GO:0016192),Cellular Component:membrane coat (GO:0030117),Cellular Component:COPI vesicle coat (GO:0030126)
CAFS_HM_T_00057224	2	Molecular Function:structural molecule activity (GO:0005198),Cellular Component:intermediate filament (GO:0005882)
CAFS_HM_T_00020610	2	Molecular Function:calcium ion binding (GO:0005509),Molecular Function:protein binding (GO:0005515)
CAFS_HM_T_00088307	3	Molecular Function:endopeptidase inhibitor activity (GO:0004866),Cellular Component:extracellular region (GO:0005576),Cellular Component:extracellular space (GO:0005615)
CAFS_HM_T_00063291	--	--
CAFS_HM_T_00071148	2	Molecular Function:nucleotide binding (GO:0000166),Molecular Function:metal ion binding (GO:0046872)
CAFS_HM_T_00052531	4	Molecular Function:ATP binding (GO:0005524),Biological Process:ATP synthesis coupled proton transport (GO:0015986),Biological Process:proton transport (GO:0015992),Biological Process:ATP metabolic process (GO:0046034)
CAFS_HM_T_00081275	6	Molecular Function:catalytic activity (GO:0003824),Molecular Function:3-hydroxyacyl-CoA dehydrogenase activity (GO:0003857),Biological Process:fatty acid metabolic process (GO:0006631),Biological Process:metabolic process (GO:0008152),Molecular Function:oxidoreductase activity (GO:0016491),Biological Process:oxidation-reduction process (GO:0055114)
CAFS_HM_T_00035112	2	Biological Process:metabolic process (GO:0008152),Molecular Function:methyltransferase activity (GO:0008168)
CAFS_HM_T_00063618	1	Biological Process:cell redox homeostasis (GO:0045454)
CAFS_HM_T_00010012	6	Molecular Function:nucleotide binding (GO:0000166),Molecular Function:nucleic acid binding (GO:0003676),Molecular Function:alanine-tRNA ligase activity (GO:0004813),Molecular Function:ATP binding (GO:0005524),Biological Process:alanyl-tRNA aminoacylation (GO:0006419),Biological Process:tRNA aminoacylation (GO:0043039)
CAFS_HM_T_00052088	2	Molecular Function:nucleotide binding (GO:0000166),Molecular Function:metal ion binding (GO:0046872)
CAFS_HM_T_00038735	2	Molecular Function:nucleic acid binding (GO:0003676),Molecular Function:ATP binding (GO:0005524)
CAFS_HM_T_00061120	1	Biological Process:cell redox homeostasis (GO:0045454)
CAFS_HM_T_00085804	--	--
CAFS_HM_T_00088295	3	Molecular Function:endopeptidase inhibitor activity (GO:0004866),Cellular Component:extracellular region (GO:0005576),Cellular Component:extracellular space (GO:0005615)
CAFS_HM_T_00046525	1	Biological Process:metabolic process (GO:0008152)
CAFS_HM_T_00085817	3	Molecular Function:iron ion binding (GO:0005506),Molecular Function:heme binding (GO:0020037),Biological Process:oxidation-reduction process (GO:0055114)
CAFS_HM_T_00058936	2	Molecular Function:structural molecule activity (GO:0005198),Cellular Component:intermediate filament (GO:0005882)
CAFS_HM_T_00031519	5	Molecular Function:ATP binding (GO:0005524),Biological Process:cellular amino acid metabolic process (GO:0006520),Molecular Function:amino acid binding (GO:0016597),Molecular Function:carboxyl- or carbamoyltransferase activity (GO:0016743),Molecular Function:hydrolase activity (GO:0016787)
CAFS_HM_T_00028841	1	Cellular Component:cytoskeleton (GO:0005856)
CAFS_HM_T_00051948	2	Biological Process:metabolic process (GO:0008152),Molecular Function:CoA-transferase activity (GO:0008410)
CAFS_HM_T_00005387	--	--
CAFS_HM_T_00018974	1	Molecular Function:hydrolase activity (GO:0016787)
CAFS_HM_T_00088555	4	Molecular Function:RNA binding (GO:0003723),Molecular Function:protein binding (GO:0005515),Molecular Function:U6 snRNA binding (GO:0017070),Molecular Function:U5 snRNA binding (GO:0030623)
CAFS_HM_T_00024417	3	Biological Process:metabolic process (GO:0008152),Molecular Function:amino acid binding (GO:0016597),Biological Process:oxidation-reduction process (GO:0055114)
CAFS_HM_T_00074967	1	Biological Process:metabolic process (GO:0008152)
CAFS_HM_T_00073537	3	Molecular Function:IMP cyclohydrolase activity (GO:0003937),Molecular Function:phosphoribosylaminoimidazolecarboxamide formyltransferase activity (GO:0004643),Biological Process:purine nucleotide biosynthetic process (GO:0006164)
CAFS_HM_T_00078997	1	Biological Process:oxidation-reduction process (GO:0055114)
CAFS_HM_T_00052299	2	Molecular Function:transaminase activity (GO:0008483),Molecular Function:pyridoxal phosphate binding (GO:0030170)
CAFS_HM_T_00022076	2	Biological Process:ubiquitin-dependent protein catabolic process (GO:0006511),Molecular Function:ubiquitin protein ligase binding (GO:0031625)
CAFS_HM_T_00017666	1	Molecular Function:O-methyltransferase activity (GO:0008171)
CAFS_HM_T_00062655	1	Biological Process:metabolic process (GO:0008152)
CAFS_HM_T_00084393	2	Molecular Function:nucleotide binding (GO:0000166),Molecular Function:metal ion binding (GO:0046872)
CAFS_HM_T_00073772	2	Molecular Function:lipid transporter activity (GO:0005319),Biological Process:lipid transport (GO:0006869)
CAFS_HM_T_00053004	--	--
CAFS_HM_T_00092009	2	Molecular Function:lipid transporter activity (GO:0005319),Biological Process:lipid transport (GO:0006869)
CAFS_HM_T_00033005	6	Molecular Function:catalytic activity (GO:0003824),Molecular Function:3-hydroxyacyl-CoA dehydrogenase activity (GO:0003857),Biological Process:fatty acid metabolic process (GO:0006631),Biological Process:metabolic process (GO:0008152),Molecular Function:oxidoreductase activity (GO:0016491),Biological Process:oxidation-reduction process (GO:0055114)
CAFS_HM_T_00013083	1	Molecular Function:transferase activity (GO:0016740)
CAFS_HM_T_00015429	3	Biological Process:metabolic process (GO:0008152),Molecular Function:oxidoreductase activity (GO:0016491),Biological Process:oxidation-reduction process (GO:0055114)
CAFS_HM_T_00051701	1	Molecular Function:catalytic activity (GO:0003824)
CAFS_HM_T_00082797	3	Molecular Function:malate dehydrogenase (decarboxylating) (NAD+) activity (GO:0004471),Molecular Function:NAD binding (GO:0051287),Biological Process:oxidation-reduction process (GO:0055114)
CAFS_HM_T_00026478	2	Molecular Function:GDP-dissociation inhibitor activity (GO:0005092),Biological Process:small GTPase mediated signal transduction (GO:0007264)
CAFS_HM_T_00019121	1	Biological Process:carbohydrate metabolic process (GO:0005975)
CAFS_HM_T_00051204	4	Molecular Function:nucleotide binding (GO:0000166),Molecular Function:aminoacyl-tRNA ligase activity (GO:0004812),Molecular Function:ATP binding (GO:0005524),Biological Process:tRNA aminoacylation for protein translation (GO:0006418)
CAFS_HM_T_00090923	1	Molecular Function:protein binding (GO:0005515)
CAFS_HM_T_00004827	1	Biological Process:metabolic process (GO:0008152)
CAFS_HM_T_00071989	3	Molecular Function:endopeptidase inhibitor activity (GO:0004866),Cellular Component:extracellular region (GO:0005576),Cellular Component:extracellular space (GO:0005615)
CAFS_HM_T_00043643	3	Biological Process:cellular amino acid metabolic process (GO:0006520),Molecular Function:oxidoreductase activity (GO:0016491),Biological Process:oxidation-reduction process (GO:0055114)
CAFS_HM_T_00048267	5	Molecular Function:acyl-CoA dehydrogenase activity (GO:0003995),Molecular Function:acyl-CoA oxidase activity (GO:0003997),Cellular Component:peroxisome (GO:0005777),Biological Process:fatty acid beta-oxidation (GO:0006635),Biological Process:oxidation-reduction process (GO:0055114)
CAFS_HM_T_00047396	5	Molecular Function:structural molecule activity (GO:0005198),Biological Process:intracellular protein transport (GO:0006886),Biological Process:vesicle-mediated transport (GO:0016192),Cellular Component:membrane coat (GO:0030117),Cellular Component:COPI vesicle coat (GO:0030126)
CAFS_HM_T_00009042	4	Molecular Function:calcium ion binding (GO:0005509),Cellular Component:endoplasmic reticulum (GO:0005783),Biological Process:protein folding (GO:0006457),Molecular Function:unfolded protein binding (GO:0051082)
CAFS_HM_T_00043946	--	--
CAFS_HM_T_00073708	5	Molecular Function:receptor binding (GO:0005102),Cellular Component:fibrinogen complex (GO:0005577),Biological Process:signal transduction (GO:0007165),Biological Process:platelet activation (GO:0030168),Biological Process:protein polymerization (GO:0051258)
CAFS_HM_T_00042658	1	Molecular Function:nucleic acid binding (GO:0003676)
CAFS_HM_T_00039192	1	Biological Process:metabolic process (GO:0008152)
CAFS_HM_T_00018426	--	--
CAFS_HM_T_00047885	4	Molecular Function:catalytic activity (GO:0003824),Molecular Function:fumarylacetoacetase activity (GO:0004334),Biological Process:metabolic process (GO:0008152),Biological Process:aromatic amino acid family metabolic process (GO:0009072)
CAFS_HM_T_00055842	4	Molecular Function:dolichyl-diphosphooligosaccharide-protein glycotransferase activity (GO:0004579),Cellular Component:endoplasmic reticulum (GO:0005783),Biological Process:protein glycosylation (GO:0006486),Cellular Component:integral component of membrane (GO:0016021)
CAFS_HM_T_00062658	--	--
CAFS_HM_T_00033330	--	--
CAFS_HM_T_00006740	3	Biological Process:metabolic process (GO:0008152),Molecular Function:oxidoreductase activity (GO:0016491),Biological Process:oxidation-reduction process (GO:0055114)
CAFS_HM_T_00016252	--	--
CAFS_HM_T_00042004	2	Molecular Function:catalytic activity (GO:0003824),Biological Process:metabolic process (GO:0008152)
CAFS_HM_T_00090643	--	--
CAFS_HM_T_00034403	4	Molecular Function:N,N-dimethylaniline monooxygenase activity (GO:0004499),Molecular Function:flavin adenine dinucleotide binding (GO:0050660),Molecular Function:NADP binding (GO:0050661),Biological Process:oxidation-reduction process (GO:0055114)
CAFS_HM_T_00078136	1	Cellular Component:cytoskeleton (GO:0005856)
CAFS_HM_T_00084314	2	Molecular Function:triose-phosphate isomerase activity (GO:0004807),Biological Process:metabolic process (GO:0008152)
CAFS_HM_T_00018279	3	Molecular Function:oxidoreductase activity (GO:0016491),Molecular Function:iron-sulfur cluster binding (GO:0051536),Biological Process:oxidation-reduction process (GO:0055114)
CAFS_HM_T_00069897	1	Molecular Function:GTPase activity (GO:0003924)
CAFS_HM_T_00076336	1	Molecular Function:GTP binding (GO:0005525)
CAFS_HM_T_00026326	5	Molecular Function:structural molecule activity (GO:0005198),Biological Process:intracellular protein transport (GO:0006886),Biological Process:vesicle-mediated transport (GO:0016192),Cellular Component:membrane coat (GO:0030117),Cellular Component:COPI vesicle coat (GO:0030126)
CAFS_HM_T_00072318	3	Molecular Function:iron ion binding (GO:0005506),Molecular Function:heme binding (GO:0020037),Biological Process:oxidation-reduction process (GO:0055114)
CAFS_HM_T_00065374	4	Biological Process:intracellular protein transport (GO:0006886),Biological Process:vesicle-mediated transport (GO:0016192),Cellular Component:membrane coat (GO:0030117),Cellular Component:clathrin adaptor complex (GO:0030131)
CAFS_HM_T_00019377	1	Molecular Function:urocanate hydratase activity (GO:0016153)
CAFS_HM_T_00009337	3	Molecular Function:magnesium ion binding (GO:0000287),Molecular Function:catalytic activity (GO:0003824),Molecular Function:thiamine pyrophosphate binding (GO:0030976)
CAFS_HM_T_00064350	2	Molecular Function:oxidoreductase activity (GO:0016491),Biological Process:oxidation-reduction process (GO:0055114)
CAFS_HM_T_00080753	--	--
CAFS_HM_T_00016361	2	Molecular Function:structural molecule activity (GO:0005198),Cellular Component:intermediate filament (GO:0005882)
CAFS_HM_T_00018973	--	--
CAFS_HM_T_00085985	3	Molecular Function:FMN binding (GO:0010181),Molecular Function:oxidoreductase activity (GO:0016491),Biological Process:oxidation-reduction process (GO:0055114)
CAFS_HM_T_00045889	1	Molecular Function:catalytic activity (GO:0003824)
CAFS_HM_T_00021153	--	--
CAFS_HM_T_00071627	3	Biological Process:metabolic process (GO:0008152),Molecular Function:NAD binding (GO:0051287),Biological Process:oxidation-reduction process (GO:0055114)
CAFS_HM_T_00071994	3	Molecular Function:endopeptidase inhibitor activity (GO:0004866),Cellular Component:extracellular region (GO:0005576),Cellular Component:extracellular space (GO:0005615)
CAFS_HM_T_00024296	--	--
CAFS_HM_T_00054151	1	Molecular Function:GTPase activity (GO:0003924)
CAFS_HM_T_00081042	--	--
CAFS_HM_T_00053808	2	Molecular Function:metallopeptidase activity (GO:0008237),Molecular Function:zinc ion binding (GO:0008270)
CAFS_HM_T_00037188	1	Biological Process:oxidation-reduction process (GO:0055114)
CAFS_HM_T_00050564	--	--
CAFS_HM_T_00011045	1	Molecular Function:oxidoreductase activity (GO:0016491)
CAFS_HM_T_00071811	5	Molecular Function:receptor binding (GO:0005102),Cellular Component:fibrinogen complex (GO:0005577),Biological Process:signal transduction (GO:0007165),Biological Process:platelet activation (GO:0030168),Biological Process:protein polymerization (GO:0051258)
CAFS_HM_T_00073543	1	Molecular Function:GTPase activity (GO:0003924)
CAFS_HM_T_00082643	1	Molecular Function:selenium binding (GO:0008430)
CAFS_HM_T_00053257	--	--
CAFS_HM_T_00024851	5	Molecular Function:serine-type endopeptidase activity (GO:0004252),Molecular Function:scavenger receptor activity (GO:0005044),Molecular Function:protein binding (GO:0005515),Biological Process:proteolysis (GO:0006508),Cellular Component:membrane (GO:0016020)
CAFS_HM_T_00043863	1	Biological Process:metabolic process (GO:0008152)
CAFS_HM_T_00043112	2	Biological Process:tricarboxylic acid cycle (GO:0006099),Molecular Function:lyase activity (GO:0016829)
CAFS_HM_T_00063233	3	Molecular Function:glucose-6-phosphate isomerase activity (GO:0004347),Biological Process:gluconeogenesis (GO:0006094),Biological Process:glycolytic process (GO:0006096)
CAFS_HM_T_00024458	2	Molecular Function:glycogen (starch) synthase activity (GO:0004373),Biological Process:glycogen biosynthetic process (GO:0005978)
CAFS_HM_T_00025682	1	Molecular Function:ATP binding (GO:0005524)
CAFS_HM_T_00078102	5	Molecular Function:structural molecule activity (GO:0005198),Molecular Function:protein binding (GO:0005515),Biological Process:intracellular protein transport (GO:0006886),Biological Process:vesicle-mediated transport (GO:0016192),Cellular Component:membrane coat (GO:0030117)
CAFS_HM_T_00050263	--	--
CAFS_HM_T_00004622	2	Molecular Function:oxidoreductase activity (GO:0016491),Biological Process:oxidation-reduction process (GO:0055114)
CAFS_HM_T_00023279	2	Molecular Function:methionine adenosyltransferase activity (GO:0004478),Biological Process:S-adenosylmethionine biosynthetic process (GO:0006556)
CAFS_HM_T_00090821	5	Molecular Function:electron carrier activity (GO:0009055),Molecular Function:oxidoreductase activity (GO:0016491),Molecular Function:metal ion binding (GO:0046872),Molecular Function:iron-sulfur cluster binding (GO:0051536),Biological Process:oxidation-reduction process (GO:0055114)
CAFS_HM_T_00008117	5	Molecular Function:glycerol-3-phosphate dehydrogenase [NAD+] activity (GO:0004367),Biological Process:carbohydrate metabolic process (GO:0005975),Biological Process:glycerol-3-phosphate catabolic process (GO:0046168),Molecular Function:NAD binding (GO:0051287),Biological Process:oxidation-reduction process (GO:0055114)
CAFS_HM_T_00073250	1	Molecular Function:ATP binding (GO:0005524)
CAFS_HM_T_00021106	3	Biological Process:cellular amino acid metabolic process (GO:0006520),Molecular Function:oxidoreductase activity (GO:0016491),Biological Process:oxidation-reduction process (GO:0055114)
CAFS_HM_T_00082667	3	Biological Process:metabolic process (GO:0008152),Molecular Function:oxidoreductase activity (GO:0016491),Biological Process:oxidation-reduction process (GO:0055114)
CAFS_HM_T_00000561	1	Molecular Function:GTPase activity (GO:0003924)
CAFS_HM_T_00051706	1	Molecular Function:ATP binding (GO:0005524)
CAFS_HM_T_00066554	1	Molecular Function:protein binding (GO:0005515)
CAFS_HM_T_00073577	1	Molecular Function:protein binding (GO:0005515)
CAFS_HM_T_00019974	1	Molecular Function:transferase activity (GO:0016740)
CAFS_HM_T_00048411	4	Molecular Function:acyl-CoA dehydrogenase activity (GO:0003995),Biological Process:metabolic process (GO:0008152),Molecular Function:flavin adenine dinucleotide binding (GO:0050660),Biological Process:oxidation-reduction process (GO:0055114)
CAFS_HM_T_00040353	1	Biological Process:nitrogen compound metabolic process (GO:0006807)
CAFS_HM_T_00045080	1	Biological Process:oxidation-reduction process (GO:0055114)
CAFS_HM_T_00079514	1	Molecular Function:GTPase activity (GO:0003924)
CAFS_HM_T_00038791	1	Molecular Function:GTPase activity (GO:0003924)
CAFS_HM_T_00058095	1	Molecular Function:protein binding (GO:0005515)
CAFS_HM_T_00036429	2	Molecular Function:calcium ion binding (GO:0005509),Molecular Function:protein binding (GO:0005515)
CAFS_HM_T_00071147	2	Molecular Function:nucleotide binding (GO:0000166),Molecular Function:metal ion binding (GO:0046872)
CAFS_HM_T_00023031	1	Molecular Function:protein binding (GO:0005515)
CAFS_HM_T_00084162	3	Molecular Function:magnesium ion binding (GO:0000287),Molecular Function:catalytic activity (GO:0003824),Molecular Function:thiamine pyrophosphate binding (GO:0030976)
CAFS_HM_T_00001863	3	Molecular Function:endopeptidase inhibitor activity (GO:0004866),Cellular Component:extracellular region (GO:0005576),Cellular Component:extracellular space (GO:0005615)
CAFS_HM_T_00006831	2	Molecular Function:hydroxymethylglutaryl-CoA synthase activity (GO:0004421),Biological Process:isoprenoid biosynthetic process (GO:0008299)
CAFS_HM_T_00048658	4	Molecular Function:calcium-dependent cysteine-type endopeptidase activity (GO:0004198),Molecular Function:calcium ion binding (GO:0005509),Cellular Component:intracellular (GO:0005622),Biological Process:proteolysis (GO:0006508)
CAFS_HM_T_00058384	3	Biological Process:metabolic process (GO:0008152),Molecular Function:oxidoreductase activity (GO:0016491),Biological Process:oxidation-reduction process (GO:0055114)
CAFS_HM_T_00079515	1	Molecular Function:GTPase activity (GO:0003924)
CAFS_HM_T_00037464	--	--
CAFS_HM_T_00068438	--	--
CAFS_HM_T_00057653	1	Molecular Function:GTPase activity (GO:0003924)
CAFS_HM_T_00054411	4	Molecular Function:nucleotide binding (GO:0000166),Molecular Function:aminoacyl-tRNA ligase activity (GO:0004812),Molecular Function:ATP binding (GO:0005524),Biological Process:tRNA aminoacylation for protein translation (GO:0006418)
CAFS_HM_T_00016847	5	Molecular Function:electron carrier activity (GO:0009055),Molecular Function:protein disulfide oxidoreductase activity (GO:0015035),Molecular Function:oxidoreductase activity (GO:0016491),Biological Process:cell redox homeostasis (GO:0045454),Biological Process:oxidation-reduction process (GO:0055114)
CAFS_HM_T_00023593	--	--
CAFS_HM_T_00089108	--	--
CAFS_HM_T_00083381	1	Molecular Function:hydrolase activity (GO:0016787)
CAFS_HM_T_00091832	1	Molecular Function:sulfate adenylyltransferase (ATP) activity (GO:0004781)
CAFS_HM_T_00066674	4	Biological Process:intracellular protein transport (GO:0006886),Biological Process:vesicle-mediated transport (GO:0016192),Cellular Component:membrane coat (GO:0030117),Cellular Component:clathrin adaptor complex (GO:0030131)
CAFS_HM_T_00054471	2	Molecular Function:6-phosphofructokinase activity (GO:0003872),Biological Process:glycolytic process (GO:0006096)
CAFS_HM_T_00069939	1	Molecular Function:ATP binding (GO:0005524)
CAFS_HM_T_00073187	2	Biological Process:metabolic process (GO:0008152),Molecular Function:sulfuric ester hydrolase activity (GO:0008484)
CAFS_HM_T_00047991	--	--
CAFS_HM_T_00061163	1	Molecular Function:ATP binding (GO:0005524)
CAFS_HM_T_00061077	1	Biological Process:metabolic process (GO:0008152)
CAFS_HM_T_00063958	--	--
CAFS_HM_T_00059705	3	Molecular Function:ATP binding (GO:0005524),Biological Process:proton transport (GO:0015992),Biological Process:ATP metabolic process (GO:0046034)
CAFS_HM_T_00003217	1	Biological Process:metabolic process (GO:0008152)
CAFS_HM_T_00007376	1	Molecular Function:ATP binding (GO:0005524)
CAFS_HM_T_00016137	3	Molecular Function:aminopeptidase activity (GO:0004177),Cellular Component:intracellular (GO:0005622),Biological Process:proteolysis (GO:0006508)
CAFS_HM_T_00041092	1	Molecular Function:GTPase activity (GO:0003924)
CAFS_HM_T_00035230	1	Molecular Function:protein binding (GO:0005515)
CAFS_HM_T_00037959	4	Molecular Function:calcium ion binding (GO:0005509),Cellular Component:endoplasmic reticulum (GO:0005783),Biological Process:protein folding (GO:0006457),Molecular Function:unfolded protein binding (GO:0051082)
CAFS_HM_T_00043029	6	Cellular Component:intracellular (GO:0005622),Molecular Function:methionine synthase activity (GO:0008705),Biological Process:methionine biosynthetic process (GO:0009086),Molecular Function:cobalamin binding (GO:0031419),Biological Process:pteridine-containing compound metabolic process (GO:0042558),Molecular Function:metal ion binding (GO:0046872)
CAFS_HM_T_00058811	4	Molecular Function:glucose-6-phosphate dehydrogenase activity (GO:0004345),Biological Process:glucose metabolic process (GO:0006006),Molecular Function:NADP binding (GO:0050661),Biological Process:oxidation-reduction process (GO:0055114)
CAFS_HM_T_00035464	2	Molecular Function:oxidoreductase activity (GO:0016491),Biological Process:oxidation-reduction process (GO:0055114)
CAFS_HM_T_00009918	2	Biological Process:biosynthetic process (GO:0009058),Molecular Function:pyridoxal phosphate binding (GO:0030170)
CAFS_HM_T_00011001	1	Molecular Function:calcium ion binding (GO:0005509)
CAFS_HM_T_00090703	3	Cellular Component:cytoplasm (GO:0005737),Molecular Function:cytoskeletal protein binding (GO:0008092),Cellular Component:extrinsic component of membrane (GO:0019898)
CAFS_HM_T_00054819	--	--
CAFS_HM_T_00087431	--	--
CAFS_HM_T_00091656	2	Molecular Function:oxidoreductase activity (GO:0016491),Biological Process:oxidation-reduction process (GO:0055114)
CAFS_HM_T_00075276	--	--
CAFS_HM_T_00038325	--	--
CAFS_HM_T_00060807	2	Molecular Function:asparagine synthase (glutamine-hydrolyzing) activity (GO:0004066),Biological Process:asparagine biosynthetic process (GO:0006529)
CAFS_HM_T_00032556	4	Molecular Function:antioxidant activity (GO:0016209),Molecular Function:oxidoreductase activity (GO:0016491),Molecular Function:peroxiredoxin activity (GO:0051920),Biological Process:oxidation-reduction process (GO:0055114)
CAFS_HM_T_00063415	2	Molecular Function:catalytic activity (GO:0003824),Biological Process:metabolic process (GO:0008152)
CAFS_HM_T_00018469	4	Molecular Function:motor activity (GO:0003774),Molecular Function:protein binding (GO:0005515),Molecular Function:ATP binding (GO:0005524),Cellular Component:myosin complex (GO:0016459)
CAFS_HM_T_00066767	1	Biological Process:carbohydrate metabolic process (GO:0005975)
CAFS_HM_T_00077079	3	Biological Process:metabolic process (GO:0008152),Molecular Function:oxidoreductase activity (GO:0016491),Biological Process:oxidation-reduction process (GO:0055114)
CAFS_HM_T_00063535	3	Molecular Function:oxidoreductase activity (GO:0016491),Biological Process:cell redox homeostasis (GO:0045454),Biological Process:oxidation-reduction process (GO:0055114)
CAFS_HM_T_00018776	5	Molecular Function:acyl-CoA dehydrogenase activity (GO:0003995),Molecular Function:acyl-CoA oxidase activity (GO:0003997),Cellular Component:peroxisome (GO:0005777),Biological Process:fatty acid beta-oxidation (GO:0006635),Biological Process:oxidation-reduction process (GO:0055114)
CAFS_HM_T_00004909	2	Molecular Function:calcium ion binding (GO:0005509),Molecular Function:calcium-dependent phospholipid binding (GO:0005544)
CAFS_HM_T_00020983	2	Biological Process:cell adhesion (GO:0007155),Molecular Function:actin filament binding (GO:0051015)
CAFS_HM_T_00067933	3	Molecular Function:ATP binding (GO:0005524),Biological Process:proton transport (GO:0015992),Biological Process:ATP metabolic process (GO:0046034)
CAFS_HM_T_00090964	1	Molecular Function:oxidoreductase activity (GO:0016491)
CAFS_HM_T_00072413	1	Molecular Function:protein binding (GO:0005515)
CAFS_HM_T_00071325	5	Molecular Function:receptor binding (GO:0005102),Cellular Component:fibrinogen complex (GO:0005577),Biological Process:signal transduction (GO:0007165),Biological Process:platelet activation (GO:0030168),Biological Process:protein polymerization (GO:0051258)
CAFS_HM_T_00058233	3	Molecular Function:phosphogluconate dehydrogenase (decarboxylating) activity (GO:0004616),Biological Process:pentose-phosphate shunt (GO:0006098),Biological Process:oxidation-reduction process (GO:0055114)
CAFS_HM_T_00066340	3	Molecular Function:endopeptidase inhibitor activity (GO:0004866),Cellular Component:extracellular region (GO:0005576),Cellular Component:extracellular space (GO:0005615)
CAFS_HM_T_00069920	3	Molecular Function:endopeptidase inhibitor activity (GO:0004866),Cellular Component:extracellular region (GO:0005576),Cellular Component:extracellular space (GO:0005615)
CAFS_HM_T_00025324	2	Molecular Function:metallopeptidase activity (GO:0008237),Molecular Function:zinc ion binding (GO:0008270)
CAFS_HM_T_00075094	1	Biological Process:oxidation-reduction process (GO:0055114)
CAFS_HM_T_00036291	--	--
CAFS_HM_T_00014583	2	Molecular Function:oxygen binding (GO:0019825),Molecular Function:heme binding (GO:0020037)
CAFS_HM_T_00053251	--	--
CAFS_HM_T_00078424	--	--
CAFS_HM_T_00054004	2	Molecular Function:metalloendopeptidase activity (GO:0004222),Biological Process:proteolysis (GO:0006508)
CAFS_HM_T_00082455	3	Molecular Function:zinc ion binding (GO:0008270),Biological Process:protein deubiquitination (GO:0016579),Molecular Function:thiol-dependent ubiquitinyl hydrolase activity (GO:0036459)
CAFS_HM_T_00026431	--	--
CAFS_HM_T_00013870	--	--
CAFS_HM_T_00081769	4	Molecular Function:motor activity (GO:0003774),Molecular Function:protein binding (GO:0005515),Molecular Function:ATP binding (GO:0005524),Cellular Component:myosin complex (GO:0016459)
CAFS_HM_T_00080541	--	--
CAFS_HM_T_00006701	3	Molecular Function:copper ion binding (GO:0005507),Molecular Function:oxidoreductase activity (GO:0016491),Biological Process:oxidation-reduction process (GO:0055114)
CAFS_HM_T_00011742	--	--
CAFS_HM_T_00041962	3	Molecular Function:motor activity (GO:0003774),Molecular Function:ATP binding (GO:0005524),Cellular Component:myosin complex (GO:0016459)
CAFS_HM_T_00071732	2	Molecular Function:NAD binding (GO:0051287),Biological Process:oxidation-reduction process (GO:0055114)
CAFS_HM_T_00035633	1	Biological Process:carbohydrate metabolic process (GO:0005975)
CAFS_HM_T_00090227	2	Biological Process:metabolic process (GO:0008152),Molecular Function:uridylyltransferase activity (GO:0070569)
CAFS_HM_T_00004034	--	--
CAFS_HM_T_00026363	--	--
CAFS_HM_T_00088582	3	Molecular Function:iron ion binding (GO:0005506),Molecular Function:heme binding (GO:0020037),Biological Process:oxidation-reduction process (GO:0055114)
CAFS_HM_T_00048160	2	Molecular Function:protein binding (GO:0005515),Biological Process:regulation of GTPase activity (GO:0043087)
CAFS_HM_T_00022081	2	Biological Process:biosynthetic process (GO:0009058),Molecular Function:strictosidine synthase activity (GO:0016844)
CAFS_HM_T_00046858	1	Biological Process:carbohydrate metabolic process (GO:0005975)
CAFS_HM_T_00018915	--	--
CAFS_HM_T_00035662	1	Biological Process:oxidation-reduction process (GO:0055114)
CAFS_HM_T_00037718	--	--
CAFS_HM_T_00008224	3	Molecular Function:endopeptidase inhibitor activity (GO:0004866),Cellular Component:extracellular region (GO:0005576),Cellular Component:extracellular space (GO:0005615)
CAFS_HM_T_00070234	2	Molecular Function:nucleotide binding (GO:0000166),Molecular Function:metal ion binding (GO:0046872)
CAFS_HM_T_00077283	2	Molecular Function:RNA binding (GO:0003723),Molecular Function:protein binding (GO:0005515)
CAFS_HM_T_00003584	1	Molecular Function:nucleic acid binding (GO:0003676)
CAFS_HM_T_00071402	--	--
CAFS_HM_T_00023205	1	Molecular Function:kinase activity (GO:0016301)
CAFS_HM_T_00067549	1	Molecular Function:protein binding (GO:0005515)
CAFS_HM_T_00055568	1	Molecular Function:protein binding (GO:0005515)
CAFS_HM_T_00051299	--	--
CAFS_HM_T_00039323	2	Biological Process:carbohydrate metabolic process (GO:0005975),Molecular Function:carbohydrate binding (GO:0030246)
CAFS_HM_T_00003795	--	--
CAFS_HM_T_00081090	2	Molecular Function:oxidoreductase activity (GO:0016491),Biological Process:oxidation-reduction process (GO:0055114)
CAFS_HM_T_00032217	--	--
CAFS_HM_T_00001225	3	Molecular Function:endopeptidase inhibitor activity (GO:0004866),Cellular Component:extracellular region (GO:0005576),Cellular Component:extracellular space (GO:0005615)
CAFS_HM_T_00022238	2	Biological Process:biosynthetic process (GO:0009058),Molecular Function:pyridoxal phosphate binding (GO:0030170)
CAFS_HM_T_00036966	2	Molecular Function:calcium ion binding (GO:0005509),Molecular Function:calcium-dependent phospholipid binding (GO:0005544)
CAFS_HM_T_00085463	--	--
CAFS_HM_T_00071321	1	Biological Process:cell redox homeostasis (GO:0045454)
CAFS_HM_T_00086662	--	--
CAFS_HM_T_00051687	--	--
CAFS_HM_T_00086333	3	Molecular Function:catalytic activity (GO:0003824),Biological Process:carbohydrate metabolic process (GO:0005975),Molecular Function:cation binding (GO:0043169)
CAFS_HM_T_00046698	--	--
CAFS_HM_T_00077616	4	Molecular Function:acyl-CoA dehydrogenase activity (GO:0003995),Biological Process:metabolic process (GO:0008152),Molecular Function:flavin adenine dinucleotide binding (GO:0050660),Biological Process:oxidation-reduction process (GO:0055114)
CAFS_HM_T_00051394	--	--
CAFS_HM_T_00061073	4	Molecular Function:nucleotide binding (GO:0000166),Molecular Function:aminoacyl-tRNA ligase activity (GO:0004812),Molecular Function:ATP binding (GO:0005524),Biological Process:tRNA aminoacylation for protein translation (GO:0006418)
CAFS_HM_T_00041756	1	Molecular Function:ATP binding (GO:0005524)
CAFS_HM_T_00018690	2	Molecular Function:protein-glutamine gamma-glutamyltransferase activity (GO:0003810),Biological Process:peptide cross-linking (GO:0018149)
CAFS_HM_T_00015397	4	Biological Process:intracellular protein transport (GO:0006886),Biological Process:vesicle-mediated transport (GO:0016192),Cellular Component:membrane coat (GO:0030117),Cellular Component:clathrin adaptor complex (GO:0030131)
CAFS_HM_T_00080910	1	Molecular Function:protein binding (GO:0005515)
CAFS_HM_T_00030006	1	Molecular Function:protein binding (GO:0005515)
CAFS_HM_T_00082983	1	Molecular Function:ATP binding (GO:0005524)
CAFS_HM_T_00051134	--	--
CAFS_HM_T_00084406	4	Molecular Function:nucleotide binding (GO:0000166),Molecular Function:aminoacyl-tRNA ligase activity (GO:0004812),Molecular Function:ATP binding (GO:0005524),Biological Process:tRNA aminoacylation for protein translation (GO:0006418)
CAFS_HM_T_00050542	--	--
CAFS_HM_T_00075125	--	--
CAFS_HM_T_00076524	1	Biological Process:proteolysis (GO:0006508)
CAFS_HM_T_00015583	3	Molecular Function:protein binding (GO:0005515),Biological Process:protein deubiquitination (GO:0016579),Molecular Function:thiol-dependent ubiquitinyl hydrolase activity (GO:0036459)
CAFS_HM_T_00053449	4	Molecular Function:acyl-CoA dehydrogenase activity (GO:0003995),Biological Process:metabolic process (GO:0008152),Molecular Function:flavin adenine dinucleotide binding (GO:0050660),Biological Process:oxidation-reduction process (GO:0055114)
CAFS_HM_T_00003702	2	Molecular Function:catalytic activity (GO:0003824),Biological Process:metabolic process (GO:0008152)
CAFS_HM_T_00018002	1	Molecular Function:protein binding (GO:0005515)
CAFS_HM_T_00014168	2	Biological Process:biosynthetic process (GO:0009058),Molecular Function:pyridoxal phosphate binding (GO:0030170)
CAFS_HM_T_00055664	3	Biological Process:protein N-linked glycosylation (GO:0006487),Cellular Component:oligosaccharyltransferase complex (GO:0008250),Cellular Component:integral component of membrane (GO:0016021)
CAFS_HM_T_00008540	1	Molecular Function:nucleic acid binding (GO:0003676)
CAFS_HM_T_00073412	3	Molecular Function:phosphoribosylamine-glycine ligase activity (GO:0004637),Biological Process:biosynthetic process (GO:0009058),Biological Process:purine nucleobase biosynthetic process (GO:0009113)
CAFS_HM_T_00022742	1	Molecular Function:protein binding (GO:0005515)
CAFS_HM_T_00078422	--	--
CAFS_HM_T_00056473	--	--
CAFS_HM_T_00045886	1	Molecular Function:ATP binding (GO:0005524)
CAFS_HM_T_00015013	1	Molecular Function:nucleic acid binding (GO:0003676)
CAFS_HM_T_00081432	--	--
CAFS_HM_T_00023582	--	--
CAFS_HM_T_00089103	2	Molecular Function:RNA binding (GO:0003723),Molecular Function:protein binding (GO:0005515)
CAFS_HM_T_00041894	3	Biological Process:metabolic process (GO:0008152),Molecular Function:oxidoreductase activity (GO:0016491),Biological Process:oxidation-reduction process (GO:0055114)
CAFS_HM_T_00038994	--	--
CAFS_HM_T_00064882	1	Biological Process:carbohydrate metabolic process (GO:0005975)
CAFS_HM_T_00068065	3	Cellular Component:cytoplasm (GO:0005737),Molecular Function:cytoskeletal protein binding (GO:0008092),Cellular Component:extrinsic component of membrane (GO:0019898)
CAFS_HM_T_00010935	--	--
CAFS_HM_T_00021305	1	Molecular Function:FAD binding (GO:0071949)
CAFS_HM_T_00031229	1	Biological Process:metabolic process (GO:0008152)
CAFS_HM_T_00025242	2	Biological Process:pyrimidine nucleoside metabolic process (GO:0006213),Biological Process:metabolic process (GO:0008152)
CAFS_HM_T_00065410	2	Molecular Function:nucleic acid binding (GO:0003676),Molecular Function:ATP binding (GO:0005524)
CAFS_HM_T_00002728	2	Molecular Function:serine-type endopeptidase activity (GO:0004252),Biological Process:proteolysis (GO:0006508)
CAFS_HM_T_00069763	6	Cellular Component:Golgi membrane (GO:0000139),Cellular Component:cytoplasm (GO:0005737),Biological Process:intracellular protein transport (GO:0006886),Molecular Function:protein transporter activity (GO:0008565),Cellular Component:membrane (GO:0016020),Biological Process:vesicle fusion with Golgi apparatus (GO:0048280)
CAFS_HM_T_00049726	3	Biological Process:metabolic process (GO:0008152),Molecular Function:oxidoreductase activity (GO:0016491),Biological Process:oxidation-reduction process (GO:0055114)
CAFS_HM_T_00035535	2	Molecular Function:malate synthase activity (GO:0004474),Biological Process:glyoxylate cycle (GO:0006097)
CAFS_HM_T_00044401	2	Molecular Function:extracellular matrix structural constituent (GO:0005201),Molecular Function:protein binding (GO:0005515)
CAFS_HM_T_00049606	5	Molecular Function:nucleotide binding (GO:0000166),Molecular Function:arginine-tRNA ligase activity (GO:0004814),Molecular Function:ATP binding (GO:0005524),Cellular Component:cytoplasm (GO:0005737),Biological Process:arginyl-tRNA aminoacylation (GO:0006420)
CAFS_HM_T_00065550	3	Molecular Function:oxidoreductase activity (GO:0016491),Molecular Function:protein dimerization activity (GO:0046983),Biological Process:oxidation-reduction process (GO:0055114)
CAFS_HM_T_00047028	1	Molecular Function:ATP binding (GO:0005524)
CAFS_HM_T_00040831	8	Molecular Function:nucleotide binding (GO:0000166),Molecular Function:aminoacyl-tRNA ligase activity (GO:0004812),Molecular Function:glutamine-tRNA ligase activity (GO:0004819),Molecular Function:ATP binding (GO:0005524),Cellular Component:cytoplasm (GO:0005737),Biological Process:tRNA aminoacylation for protein translation (GO:0006418),Biological Process:glutaminyl-tRNA aminoacylation (GO:000642…
CAFS_HM_T_00091702	4	Biological Process:intracellular protein transport (GO:0006886),Biological Process:ER to Golgi vesicle-mediated transport (GO:0006888),Molecular Function:zinc ion binding (GO:0008270),Cellular Component:COPII vesicle coat (GO:0030127)
CAFS_HM_T_00050332	--	--
CAFS_HM_T_00066061	5	Molecular Function:nucleotide binding (GO:0000166),Molecular Function:aminoacyl-tRNA ligase activity (GO:0004812),Molecular Function:ATP binding (GO:0005524),Biological Process:tRNA aminoacylation for protein translation (GO:0006418),Biological Process:tRNA aminoacylation (GO:0043039)
CAFS_HM_T_00058446	1	Molecular Function:ATP binding (GO:0005524)
CAFS_HM_T_00036819	1	Molecular Function:protein binding (GO:0005515)
CAFS_HM_T_00013840	1	Molecular Function:GTP binding (GO:0005525)
CAFS_HM_T_00016669	4	Molecular Function:motor activity (GO:0003774),Molecular Function:protein binding (GO:0005515),Molecular Function:ATP binding (GO:0005524),Cellular Component:myosin complex (GO:0016459)
CAFS_HM_T_00052667	1	Cellular Component:membrane (GO:0016020)
CAFS_HM_T_00077286	--	--
CAFS_HM_T_00045250	2	Molecular Function:nucleic acid binding (GO:0003676),Molecular Function:ATP binding (GO:0005524)
CAFS_HM_T_00006719	1	Molecular Function:cysteine-type endopeptidase inhibitor activity (GO:0004869)
CAFS_HM_T_00024819	--	--
CAFS_HM_T_00023239	2	Cellular Component:mitochondrial outer membrane (GO:0005741),Biological Process:transmembrane transport (GO:0055085)
CAFS_HM_T_00026362	1	Molecular Function:ATP binding (GO:0005524)
CAFS_HM_T_00027820	1	Molecular Function:extracellular matrix structural constituent (GO:0005201)
CAFS_HM_T_00019251	1	Molecular Function:pyridoxal phosphate binding (GO:0030170)
CAFS_HM_T_00034703	--	--
CAFS_HM_T_00007395	3	Biological Process:superoxide metabolic process (GO:0006801),Molecular Function:metal ion binding (GO:0046872),Biological Process:oxidation-reduction process (GO:0055114)
CAFS_HM_T_00057018	3	Molecular Function:6-phosphofructo-2-kinase activity (GO:0003873),Molecular Function:ATP binding (GO:0005524),Biological Process:fructose metabolic process (GO:0006000)
CAFS_HM_T_00076176	1	Biological Process:proteolysis (GO:0006508)
CAFS_HM_T_00039858	2	Molecular Function:nucleotide binding (GO:0000166),Molecular Function:metal ion binding (GO:0046872)
CAFS_HM_T_00068323	1	Molecular Function:GTP binding (GO:0005525)
CAFS_HM_T_00009980	3	Molecular Function:structural constituent of ribosome (GO:0003735),Cellular Component:ribosome (GO:0005840),Biological Process:translation (GO:0006412)
CAFS_HM_T_00065127	1	Biological Process:oxidation-reduction process (GO:0055114)
CAFS_HM_T_00091706	4	Molecular Function:GTP binding (GO:0005525),Biological Process:SRP-dependent cotranslational protein targeting to membrane (GO:0006614),Molecular Function:7S RNA binding (GO:0008312),Cellular Component:signal recognition particle (GO:0048500)
CAFS_HM_T_00027947	1	Molecular Function:protein binding (GO:0005515)
CAFS_HM_T_00018749	2	Molecular Function:protein binding (GO:0005515),Cellular Component:membrane (GO:0016020)
CAFS_HM_T_00049374	1	Molecular Function:ATP binding (GO:0005524)
CAFS_HM_T_00079334	1	Biological Process:cell redox homeostasis (GO:0045454)
CAFS_HM_T_00003570	--	--
CAFS_HM_T_00060445	--	--
CAFS_HM_T_00040530	2	Molecular Function:hydrogen ion transmembrane transporter activity (GO:0015078),Biological Process:ATP synthesis coupled proton transport (GO:0015986)
CAFS_HM_T_00070051	1	Molecular Function:ATP binding (GO:0005524)
CAFS_HM_T_00044195	--	--
CAFS_HM_T_00059356	5	Molecular Function:nucleotide binding (GO:0000166),Molecular Function:nucleic acid binding (GO:0003676),Molecular Function:aminoacyl-tRNA ligase activity (GO:0004812),Molecular Function:ATP binding (GO:0005524),Biological Process:tRNA aminoacylation for protein translation (GO:0006418)
CAFS_HM_T_00034007	1	Biological Process:'de novo' IMP biosynthetic process (GO:0006189)
CAFS_HM_T_00030642	2	Biological Process:metabolic process (GO:0008152),Molecular Function:hydrolase activity (GO:0016787)
CAFS_HM_T_00008334	--	--
CAFS_HM_T_00032302	--	--
CAFS_HM_T_00064928	1	Molecular Function:GTPase activity (GO:0003924)
CAFS_HM_T_00016367	4	Molecular Function:protein kinase activity (GO:0004672),Molecular Function:protein binding (GO:0005515),Molecular Function:ATP binding (GO:0005524),Biological Process:protein phosphorylation (GO:0006468)
CAFS_HM_T_00056411	1	Molecular Function:zinc ion binding (GO:0008270)
CAFS_HM_T_00024634	1	Molecular Function:lyase activity (GO:0016829)
CAFS_HM_T_00066849	--	--
CAFS_HM_T_00026185	--	--
CAFS_HM_T_00070491	4	Molecular Function:3-hydroxyacyl-CoA dehydrogenase activity (GO:0003857),Biological Process:fatty acid metabolic process (GO:0006631),Molecular Function:oxidoreductase activity (GO:0016491),Biological Process:oxidation-reduction process (GO:0055114)
CAFS_HM_T_00031049	4	Molecular Function:ATP binding (GO:0005524),Biological Process:protein folding (GO:0006457),Biological Process:response to stress (GO:0006950),Molecular Function:unfolded protein binding (GO:0051082)
CAFS_HM_T_00018258	3	Molecular Function:aminopeptidase activity (GO:0004177),Biological Process:proteolysis (GO:0006508),Molecular Function:zinc ion binding (GO:0008270)
CAFS_HM_T_00045900	1	Molecular Function:ATP binding (GO:0005524)
CAFS_HM_T_00048449	2	Molecular Function:glycerone kinase activity (GO:0004371),Biological Process:glycerol metabolic process (GO:0006071)
CAFS_HM_T_00022405	--	--
CAFS_HM_T_00062457	2	Molecular Function:oxidoreductase activity (GO:0016491),Biological Process:oxidation-reduction process (GO:0055114)
CAFS_HM_T_00009213	4	Molecular Function:acyl-CoA dehydrogenase activity (GO:0003995),Biological Process:metabolic process (GO:0008152),Molecular Function:flavin adenine dinucleotide binding (GO:0050660),Biological Process:oxidation-reduction process (GO:0055114)
CAFS_HM_T_00052592	1	Molecular Function:protein binding (GO:0005515)
CAFS_HM_T_00064181	2	Biological Process:intracellular protein transport (GO:0006886),Molecular Function:phosphatidylinositol binding (GO:0035091)
CAFS_HM_T_00081013	--	--
CAFS_HM_T_00090706	3	Molecular Function:catalytic activity (GO:0003824),Molecular Function:molybdenum ion binding (GO:0030151),Molecular Function:pyridoxal phosphate binding (GO:0030170)
CAFS_HM_T_00014281	2	Molecular Function:catalytic activity (GO:0003824),Biological Process:metabolic process (GO:0008152)
CAFS_HM_T_00027633	--	--
CAFS_HM_T_00038065	--	--
CAFS_HM_T_00032587	1	Molecular Function:ATP binding (GO:0005524)
CAFS_HM_T_00027074	4	Biological Process:metabolic process (GO:0008152),Biological Process:biosynthetic process (GO:0009058),Molecular Function:oxidoreductase activity (GO:0016491),Biological Process:oxidation-reduction process (GO:0055114)
CAFS_HM_T_00082302	2	Molecular Function:endopeptidase inhibitor activity (GO:0004866),Cellular Component:extracellular region (GO:0005576)
CAFS_HM_T_00045362	1	Biological Process:oxidation-reduction process (GO:0055114)
CAFS_HM_T_00076880	3	Molecular Function:iron ion binding (GO:0005506),Molecular Function:heme binding (GO:0020037),Biological Process:oxidation-reduction process (GO:0055114)
CAFS_HM_T_00017862	2	Molecular Function:protein binding (GO:0005515),Molecular Function:lipid binding (GO:0008289)
CAFS_HM_T_00012722	--	--
CAFS_HM_T_00055699	--	--
CAFS_HM_T_00021376	2	Molecular Function:calcium ion binding (GO:0005509),Molecular Function:calcium-dependent phospholipid binding (GO:0005544)
CAFS_HM_T_00082978	2	Molecular Function:structural molecule activity (GO:0005198),Cellular Component:intermediate filament (GO:0005882)
CAFS_HM_T_00086550	1	Molecular Function:protein binding (GO:0005515)
CAFS_HM_T_00048935	2	Cellular Component:membrane (GO:0016020),Biological Process:peptidyl-amino acid modification (GO:0018193)
CAFS_HM_T_00075979	1	Molecular Function:GTPase activity (GO:0003924)
CAFS_HM_T_00062388	3	Molecular Function:iron ion binding (GO:0005506),Molecular Function:heme binding (GO:0020037),Biological Process:oxidation-reduction process (GO:0055114)
CAFS_HM_T_00091719	1	Molecular Function:ATP binding (GO:0005524)
CAFS_HM_T_00033535	1	Biological Process:cell redox homeostasis (GO:0045454)
CAFS_HM_T_00051670	2	Molecular Function:serine-type endopeptidase activity (GO:0004252),Biological Process:proteolysis (GO:0006508)
CAFS_HM_T_00080171	2	Molecular Function:calcium ion binding (GO:0005509),Molecular Function:protein binding (GO:0005515)
CAFS_HM_T_00038746	1	Molecular Function:protein binding (GO:0005515)
CAFS_HM_T_00010215	1	Cellular Component:nuclear pore (GO:0005643)
CAFS_HM_T_00045863	1	Molecular Function:protein binding (GO:0005515)
CAFS_HM_T_00031942	--	--
CAFS_HM_T_00067645	2	Molecular Function:nucleotide binding (GO:0000166),Molecular Function:metal ion binding (GO:0046872)
CAFS_HM_T_00042409	3	Molecular Function:catalytic activity (GO:0003824),Biological Process:metabolic process (GO:0008152),Molecular Function:cofactor binding (GO:0048037)
CAFS_HM_T_00027817	4	Molecular Function:acyl-CoA dehydrogenase activity (GO:0003995),Biological Process:metabolic process (GO:0008152),Molecular Function:flavin adenine dinucleotide binding (GO:0050660),Biological Process:oxidation-reduction process (GO:0055114)
CAFS_HM_T_00017811	3	Molecular Function:aminopeptidase activity (GO:0004177),Cellular Component:intracellular (GO:0005622),Biological Process:proteolysis (GO:0006508)
CAFS_HM_T_00018151	--	--
CAFS_HM_T_00077598	--	--
CAFS_HM_T_00012213	1	Molecular Function:ATP binding (GO:0005524)
CAFS_HM_T_00071018	--	--
CAFS_HM_T_00091137	--	--
CAFS_HM_T_00013675	4	Molecular Function:structural constituent of ribosome (GO:0003735),Cellular Component:intracellular (GO:0005622),Cellular Component:ribosome (GO:0005840),Biological Process:translation (GO:0006412)
CAFS_HM_T_00020835	4	Molecular Function:magnesium ion binding (GO:0000287),Molecular Function:inorganic diphosphatase activity (GO:0004427),Cellular Component:cytoplasm (GO:0005737),Biological Process:phosphate-containing compound metabolic process (GO:0006796)
CAFS_HM_T_00088131	--	--
CAFS_HM_T_00070563	4	Molecular Function:antioxidant activity (GO:0016209),Molecular Function:oxidoreductase activity (GO:0016491),Molecular Function:peroxiredoxin activity (GO:0051920),Biological Process:oxidation-reduction process (GO:0055114)
CAFS_HM_T_00090319	4	Molecular Function:nucleotide binding (GO:0000166),Molecular Function:aminoacyl-tRNA ligase activity (GO:0004812),Molecular Function:ATP binding (GO:0005524),Biological Process:tRNA aminoacylation for protein translation (GO:0006418)
CAFS_HM_T_00062812	1	Molecular Function:ATP binding (GO:0005524)
CAFS_HM_T_00045808	3	Molecular Function:iron ion binding (GO:0005506),Molecular Function:heme binding (GO:0020037),Biological Process:oxidation-reduction process (GO:0055114)
CAFS_HM_T_00078073	1	Molecular Function:protein binding (GO:0005515)
CAFS_HM_T_00033486	3	Molecular Function:nucleic acid binding (GO:0003676),Molecular Function:protein binding (GO:0005515),Molecular Function:ATP binding (GO:0005524)
CAFS_HM_T_00036935	2	Biological Process:cell adhesion (GO:0007155),Molecular Function:actin filament binding (GO:0051015)
CAFS_HM_T_00031348	4	Biological Process:metabolic process (GO:0008152),Molecular Function:intramolecular transferase activity (GO:0016866),Molecular Function:cobalamin binding (GO:0031419),Molecular Function:metal ion binding (GO:0046872)
CAFS_HM_T_00049109	2	Biological Process:intracellular protein transport (GO:0006886),Molecular Function:Ran GTPase binding (GO:0008536)
CAFS_HM_T_00027584	5	Molecular Function:tRNA binding (GO:0000049),Molecular Function:nucleotide binding (GO:0000166),Molecular Function:aminoacyl-tRNA ligase activity (GO:0004812),Molecular Function:ATP binding (GO:0005524),Biological Process:tRNA aminoacylation for protein translation (GO:0006418)
CAFS_HM_T_00063417	2	Molecular Function:catalytic activity (GO:0003824),Biological Process:metabolic process (GO:0008152)
CAFS_HM_T_00008623	--	--
CAFS_HM_T_00001457	2	Molecular Function:nucleic acid binding (GO:0003676),Cellular Component:nucleus (GO:0005634)
CAFS_HM_T_00014875	2	Molecular Function:Rho GDP-dissociation inhibitor activity (GO:0005094),Cellular Component:cytoplasm (GO:0005737)
CAFS_HM_T_00082500	--	--
CAFS_HM_T_00067100	2	Molecular Function:phospholipase activity (GO:0004620),Biological Process:phospholipid catabolic process (GO:0009395)
CAFS_HM_T_00028713	--	--
CAFS_HM_T_00071403	1	Biological Process:carbohydrate biosynthetic process (GO:0016051)
CAFS_HM_T_00016782	1	Molecular Function:calcium ion binding (GO:0005509)
CAFS_HM_T_00045056	--	--
CAFS_HM_T_00008821	1	Molecular Function:ATP binding (GO:0005524)
CAFS_HM_T_00000968	1	Biological Process:carbohydrate metabolic process (GO:0005975)
CAFS_HM_T_00054150	4	Molecular Function:oxidoreductase activity (GO:0016491),Molecular Function:molybdenum ion binding (GO:0030151),Biological Process:nitrate assimilation (GO:0042128),Biological Process:oxidation-reduction process (GO:0055114)
CAFS_HM_T_00014015	2	Molecular Function:extracellular matrix structural constituent (GO:0005201),Molecular Function:protein binding (GO:0005515)
CAFS_HM_T_00042530	1	Molecular Function:ATP binding (GO:0005524)
CAFS_HM_T_00019321	2	Molecular Function:structural molecule activity (GO:0005198),Cellular Component:intermediate filament (GO:0005882)
CAFS_HM_T_00074845	2	Molecular Function:zinc ion binding (GO:0008270),Biological Process:catabolic process (GO:0009056)
CAFS_HM_T_00031409	2	Molecular Function:serine-type endopeptidase activity (GO:0004252),Biological Process:proteolysis (GO:0006508)
CAFS_HM_T_00044466	--	--
CAFS_HM_T_00014742	1	Molecular Function:GTP binding (GO:0005525)
CAFS_HM_T_00029107	2	Molecular Function:nucleic acid binding (GO:0003676),Molecular Function:RNA binding (GO:0003723)
CAFS_HM_T_00028216	3	Molecular Function:iron ion binding (GO:0005506),Molecular Function:heme binding (GO:0020037),Biological Process:oxidation-reduction process (GO:0055114)
CAFS_HM_T_00008957	2	Molecular Function:structural molecule activity (GO:0005198),Cellular Component:intermediate filament (GO:0005882)
CAFS_HM_T_00052684	5	Molecular Function:nucleotide binding (GO:0000166),Molecular Function:nucleic acid binding (GO:0003676),Molecular Function:aminoacyl-tRNA ligase activity (GO:0004812),Molecular Function:ATP binding (GO:0005524),Biological Process:tRNA aminoacylation for protein translation (GO:0006418)
CAFS_HM_T_00066681	1	Molecular Function:protein binding (GO:0005515)
CAFS_HM_T_00031689	1	Biological Process:protein import into nucleus (GO:0006606)
CAFS_HM_T_00038878	1	Molecular Function:protein binding (GO:0005515)
CAFS_HM_T_00041635	4	Biological Process:intracellular protein transport (GO:0006886),Biological Process:ER to Golgi vesicle-mediated transport (GO:0006888),Molecular Function:zinc ion binding (GO:0008270),Cellular Component:COPII vesicle coat (GO:0030127)
CAFS_HM_T_00060914	--	--
CAFS_HM_T_00037681	4	Molecular Function:calcium ion binding (GO:0005509),Cellular Component:endoplasmic reticulum (GO:0005783),Biological Process:protein folding (GO:0006457),Molecular Function:unfolded protein binding (GO:0051082)
CAFS_HM_T_00069136	--	--
CAFS_HM_T_00047699	2	Biological Process:carbohydrate metabolic process (GO:0005975),Molecular Function:glycogen phosphorylase activity (GO:0008184)
CAFS_HM_T_00043726	--	--
CAFS_HM_T_00046103	3	Molecular Function:quinone binding (GO:0048038),Molecular Function:NAD binding (GO:0051287),Biological Process:oxidation-reduction process (GO:0055114)
CAFS_HM_T_00001453	1	Biological Process:carbohydrate metabolic process (GO:0005975)
CAFS_HM_T_00067536	--	--
CAFS_HM_T_00037368	2	Molecular Function:actin binding (GO:0003779),Cellular Component:intracellular (GO:0005622)
CAFS_HM_T_00050362	--	--
CAFS_HM_T_00015516	3	Molecular Function:translation initiation factor activity (GO:0003743),Cellular Component:cytoplasm (GO:0005737),Cellular Component:eukaryotic translation initiation factor 3 complex (GO:0005852)
CAFS_HM_T_00084915	2	Molecular Function:serine-type endopeptidase activity (GO:0004252),Biological Process:proteolysis (GO:0006508)
CAFS_HM_T_00070626	--	--
CAFS_HM_T_00073685	1	Biological Process:carbohydrate metabolic process (GO:0005975)
CAFS_HM_T_00086755	4	Molecular Function:motor activity (GO:0003774),Molecular Function:protein binding (GO:0005515),Molecular Function:ATP binding (GO:0005524),Cellular Component:myosin complex (GO:0016459)
CAFS_HM_T_00068410	--	--
CAFS_HM_T_00061301	4	Molecular Function:acyl-CoA dehydrogenase activity (GO:0003995),Biological Process:metabolic process (GO:0008152),Molecular Function:flavin adenine dinucleotide binding (GO:0050660),Biological Process:oxidation-reduction process (GO:0055114)
CAFS_HM_T_00061797	1	Molecular Function:protein binding (GO:0005515)
CAFS_HM_T_00055425	1	Molecular Function:protein binding (GO:0005515)
CAFS_HM_T_00062038	--	--
CAFS_HM_T_00088929	5	Molecular Function:magnesium ion binding (GO:0000287),Molecular Function:RNA binding (GO:0003723),Molecular Function:phenylalanine-tRNA ligase activity (GO:0004826),Molecular Function:ATP binding (GO:0005524),Biological Process:phenylalanyl-tRNA aminoacylation (GO:0006432)
CAFS_HM_T_00052124	1	Molecular Function:protein binding (GO:0005515)
CAFS_HM_T_00064658	1	Molecular Function:protein binding (GO:0005515)
CAFS_HM_T_00063619	1	Molecular Function:kinase activity (GO:0016301)
CAFS_HM_T_00029377	2	Molecular Function:ATP binding (GO:0005524),Molecular Function:ATPase activity (GO:0016887)
CAFS_HM_T_00038965	--	--
CAFS_HM_T_00070681	2	Molecular Function:catalytic activity (GO:0003824),Biological Process:metabolic process (GO:0008152)
CAFS_HM_T_00035492	--	--
CAFS_HM_T_00091403	--	--
CAFS_HM_T_00013126	2	Molecular Function:oxidoreductase activity (GO:0016491),Biological Process:oxidation-reduction process (GO:0055114)
CAFS_HM_T_00000528	--	--
CAFS_HM_T_00040871	3	Molecular Function:ionotropic glutamate receptor activity (GO:0004970),Molecular Function:extracellular-glutamate-gated ion channel activity (GO:0005234),Cellular Component:membrane (GO:0016020)
CAFS_HM_T_00069036	1	Molecular Function:protein binding (GO:0005515)
CAFS_HM_T_00070772	--	--
CAFS_HM_T_00037855	3	Molecular Function:coproporphyrinogen oxidase activity (GO:0004109),Biological Process:porphyrin-containing compound biosynthetic process (GO:0006779),Biological Process:oxidation-reduction process (GO:0055114)
CAFS_HM_T_00022179	3	Molecular Function:3-hydroxyanthranilate 3,4-dioxygenase activity (GO:0000334),Molecular Function:iron ion binding (GO:0005506),Biological Process:oxidation-reduction process (GO:0055114)
CAFS_HM_T_00005390	--	--
CAFS_HM_T_00022776	2	Molecular Function:catalytic activity (GO:0003824),Biological Process:metabolic process (GO:0008152)
CAFS_HM_T_00057687	4	Molecular Function:nucleotide binding (GO:0000166),Molecular Function:aminoacyl-tRNA ligase activity (GO:0004812),Molecular Function:ATP binding (GO:0005524),Biological Process:tRNA aminoacylation for protein translation (GO:0006418)
CAFS_HM_T_00044494	1	Molecular Function:sulfotransferase activity (GO:0008146)
CAFS_HM_T_00068905	5	Molecular Function:alpha-mannosidase activity (GO:0004559),Biological Process:carbohydrate metabolic process (GO:0005975),Biological Process:mannose metabolic process (GO:0006013),Molecular Function:zinc ion binding (GO:0008270),Molecular Function:mannosidase activity (GO:0015923)
CAFS_HM_T_00021073	2	Molecular Function:ATP binding (GO:0005524),Biological Process:carbohydrate metabolic process (GO:0005975)
CAFS_HM_T_00069747	2	Molecular Function:catalytic activity (GO:0003824),Biological Process:nucleoside metabolic process (GO:0009116)
CAFS_HM_T_00036669	1	Molecular Function:protein binding (GO:0005515)
CAFS_HM_T_00090684	1	Molecular Function:protein binding (GO:0005515)
CAFS_HM_T_00044065	2	Molecular Function:catalytic activity (GO:0003824),Molecular Function:hydrolase activity (GO:0016787)
CAFS_HM_T_00029551	3	Molecular Function:calcium ion binding (GO:0005509),Molecular Function:protein binding (GO:0005515),Molecular Function:microtubule binding (GO:0008017)
CAFS_HM_T_00053128	--	--
CAFS_HM_T_00052313	1	Cellular Component:membrane (GO:0016020)
CAFS_HM_T_00047022	5	Molecular Function:serine-type endopeptidase activity (GO:0004252),Molecular Function:calcium ion binding (GO:0005509),Cellular Component:extracellular region (GO:0005576),Biological Process:proteolysis (GO:0006508),Biological Process:blood coagulation (GO:0007596)
CAFS_HM_T_00047753	--	--
CAFS_HM_T_00085288	1	Molecular Function:sulfotransferase activity (GO:0008146)
CAFS_HM_T_00042104	1	Molecular Function:ATP binding (GO:0005524)
CAFS_HM_T_00018125	2	Molecular Function:nucleic acid binding (GO:0003676),Molecular Function:ATP binding (GO:0005524)
CAFS_HM_T_00018783	4	Molecular Function:signal recognition particle binding (GO:0005047),Biological Process:SRP-dependent cotranslational protein targeting to membrane (GO:0006614),Molecular Function:7S RNA binding (GO:0008312),Molecular Function:endoplasmic reticulum signal peptide binding (GO:0030942)
CAFS_HM_T_00046804	5	Molecular Function:nucleotide binding (GO:0000166),Molecular Function:nucleic acid binding (GO:0003676),Molecular Function:aminoacyl-tRNA ligase activity (GO:0004812),Molecular Function:ATP binding (GO:0005524),Biological Process:tRNA aminoacylation for protein translation (GO:0006418)
CAFS_HM_T_00043102	2	Molecular Function:calcium ion binding (GO:0005509),Molecular Function:calcium-dependent phospholipid binding (GO:0005544)
CAFS_HM_T_00032818	--	--
CAFS_HM_T_00089324	--	--
CAFS_HM_T_00016920	--	--
CAFS_HM_T_00028202	1	Molecular Function:protein binding (GO:0005515)
CAFS_HM_T_00010014	2	Molecular Function:nucleic acid binding (GO:0003676),Cellular Component:nucleus (GO:0005634)
CAFS_HM_T_00081762	2	Molecular Function:catalytic activity (GO:0003824),Biological Process:nucleoside metabolic process (GO:0009116)
CAFS_HM_T_00079405	5	Molecular Function:nucleotide binding (GO:0000166),Molecular Function:nucleic acid binding (GO:0003676),Molecular Function:aminoacyl-tRNA ligase activity (GO:0004812),Molecular Function:ATP binding (GO:0005524),Biological Process:tRNA aminoacylation for protein translation (GO:0006418)
CAFS_HM_T_00029239	2	Molecular Function:asparagine synthase (glutamine-hydrolyzing) activity (GO:0004066),Biological Process:asparagine biosynthetic process (GO:0006529)
CAFS_HM_T_00077372	1	Biological Process:protein import into nucleus (GO:0006606)
CAFS_HM_T_00073202	--	--
CAFS_HM_T_00009810	1	Biological Process:oxidation-reduction process (GO:0055114)
CAFS_HM_T_00090276	3	Molecular Function:ATP binding (GO:0005524),Biological Process:proton transport (GO:0015992),Biological Process:ATP metabolic process (GO:0046034)
CAFS_HM_T_00000966	1	Biological Process:carbohydrate metabolic process (GO:0005975)
CAFS_HM_T_00049133	1	Molecular Function:protein binding (GO:0005515)
CAFS_HM_T_00006604	1	Molecular Function:cysteine-type endopeptidase inhibitor activity (GO:0004869)
CAFS_HM_T_00065303	1	Molecular Function:hydrolase activity (GO:0016787)
CAFS_HM_T_00028114	2	Biological Process:intracellular protein transport (GO:0006886),Molecular Function:Ran GTPase binding (GO:0008536)
CAFS_HM_T_00053290	5	Molecular Function:alpha-mannosidase activity (GO:0004559),Biological Process:carbohydrate metabolic process (GO:0005975),Biological Process:mannose metabolic process (GO:0006013),Molecular Function:zinc ion binding (GO:0008270),Molecular Function:mannosidase activity (GO:0015923)
CAFS_HM_T_00082850	1	Molecular Function:protein disulfide oxidoreductase activity (GO:0015035)
CAFS_HM_T_00087448	1	Molecular Function:protein binding (GO:0005515)
CAFS_HM_T_00042609	2	Molecular Function:protein binding (GO:0005515),Biological Process:signal transduction (GO:0007165)
CAFS_HM_T_00082604	1	Molecular Function:protein binding (GO:0005515)
CAFS_HM_T_00087268	1	Molecular Function:protein binding (GO:0005515)
CAFS_HM_T_00069710	3	Molecular Function:structural constituent of ribosome (GO:0003735),Cellular Component:ribosome (GO:0005840),Biological Process:translation (GO:0006412)
CAFS_HM_T_00068756	1	Cellular Component:nucleus (GO:0005634)
CAFS_HM_T_00050545	--	--
CAFS_HM_T_00035121	4	Molecular Function:protein binding (GO:0005515),Biological Process:SRP-dependent cotranslational protein targeting to membrane (GO:0006614),Molecular Function:7S RNA binding (GO:0008312),Cellular Component:signal recognition particle (GO:0048500)
CAFS_HM_T_00061238	1	Cellular Component:proteasome activator complex (GO:0008537)
CAFS_HM_T_00074186	--	--
CAFS_HM_T_00014129	--	--
CAFS_HM_T_00040840	1	Molecular Function:sulfotransferase activity (GO:0008146)
CAFS_HM_T_00008159	--	--
CAFS_HM_T_00020108	5	Molecular Function:ATP binding (GO:0005524),Biological Process:transport (GO:0006810),Cellular Component:integral component of membrane (GO:0016021),Molecular Function:ATPase activity (GO:0016887),Biological Process:transmembrane transport (GO:0055085)
CAFS_HM_T_00037811	--	--
CAFS_HM_T_00064807	3	Molecular Function:acetyl-CoA carboxylase activity (GO:0003989),Molecular Function:ATP binding (GO:0005524),Biological Process:fatty acid biosynthetic process (GO:0006633)
CAFS_HM_T_00016804	--	--
CAFS_HM_T_00015784	3	Biological Process:anion transport (GO:0006820),Molecular Function:anion transmembrane transporter activity (GO:0008509),Cellular Component:integral component of membrane (GO:0016021)
CAFS_HM_T_00028107	5	Molecular Function:nucleoside diphosphate kinase activity (GO:0004550),Biological Process:nucleoside diphosphate phosphorylation (GO:0006165),Biological Process:GTP biosynthetic process (GO:0006183),Biological Process:UTP biosynthetic process (GO:0006228),Biological Process:CTP biosynthetic process (GO:0006241)
CAFS_HM_T_00083467	1	Molecular Function:protein binding (GO:0005515)
CAFS_HM_T_00055832	2	Molecular Function:serine-type endopeptidase inhibitor activity (GO:0004867),Biological Process:hyaluronan metabolic process (GO:0030212)
CAFS_HM_T_00090739	--	--
CAFS_HM_T_00005902	3	Molecular Function:motor activity (GO:0003774),Molecular Function:ATP binding (GO:0005524),Cellular Component:myosin complex (GO:0016459)
CAFS_HM_T_00034495	1	Molecular Function:ATP binding (GO:0005524)
CAFS_HM_T_00072531	--	--
CAFS_HM_T_00053755	2	Molecular Function:GTP binding (GO:0005525),Biological Process:small GTPase mediated signal transduction (GO:0007264)
CAFS_HM_T_00045017	1	Molecular Function:protein binding (GO:0005515)
CAFS_HM_T_00018993	1	Molecular Function:protein binding (GO:0005515)
CAFS_HM_T_00008033	1	Molecular Function:GTPase activity (GO:0003924)
CAFS_HM_T_00069383	1	Molecular Function:RNA binding (GO:0003723)
CAFS_HM_T_00076832	2	Biological Process:protein deubiquitination (GO:0016579),Molecular Function:thiol-dependent ubiquitinyl hydrolase activity (GO:0036459)
CAFS_HM_T_00048959	--	--
CAFS_HM_T_00036799	--	--
CAFS_HM_T_00038250	1	Molecular Function:protein binding (GO:0005515)
CAFS_HM_T_00033691	3	Molecular Function:motor activity (GO:0003774),Molecular Function:ATP binding (GO:0005524),Cellular Component:myosin complex (GO:0016459)
CAFS_HM_T_00079203	2	Biological Process:protein deubiquitination (GO:0016579),Molecular Function:thiol-dependent ubiquitinyl hydrolase activity (GO:0036459)
CAFS_HM_T_00051111	1	Molecular Function:hydrolase activity (GO:0016787)
CAFS_HM_T_00065427	1	Biological Process:metabolic process (GO:0008152)
CAFS_HM_T_00029609	--	--
CAFS_HM_T_00015662	2	Molecular Function:DNA binding (GO:0003677),Biological Process:signal transduction (GO:0007165)
CAFS_HM_T_00053158	5	Molecular Function:endopeptidase activity (GO:0004175),Molecular Function:threonine-type endopeptidase activity (GO:0004298),Cellular Component:proteasome core complex (GO:0005839),Biological Process:ubiquitin-dependent protein catabolic process (GO:0006511),Biological Process:proteolysis involved in cellular protein catabolic process (GO:0051603)
CAFS_HM_T_00030402	2	Molecular Function:oxidoreductase activity (GO:0016491),Biological Process:oxidation-reduction process (GO:0055114)
CAFS_HM_T_00045822	1	Molecular Function:RNA binding (GO:0003723)
CAFS_HM_T_00090410	4	Molecular Function:acyl-CoA dehydrogenase activity (GO:0003995),Biological Process:metabolic process (GO:0008152),Molecular Function:flavin adenine dinucleotide binding (GO:0050660),Biological Process:oxidation-reduction process (GO:0055114)
CAFS_HM_T_00029945	1	Molecular Function:nucleic acid binding (GO:0003676)
CAFS_HM_T_00016595	3	Molecular Function:iron ion binding (GO:0005506),Molecular Function:heme binding (GO:0020037),Biological Process:oxidation-reduction process (GO:0055114)
CAFS_HM_T_00000309	4	Molecular Function:ATP binding (GO:0005524),Biological Process:protein folding (GO:0006457),Biological Process:response to stress (GO:0006950),Molecular Function:unfolded protein binding (GO:0051082)
CAFS_HM_T_00047596	--	--
CAFS_HM_T_00081054	4	Molecular Function:structural constituent of ribosome (GO:0003735),Cellular Component:intracellular (GO:0005622),Cellular Component:ribosome (GO:0005840),Biological Process:translation (GO:0006412)
CAFS_HM_T_00055819	2	Molecular Function:nucleic acid binding (GO:0003676),Molecular Function:ATP binding (GO:0005524)
CAFS_HM_T_00031202	2	Molecular Function:nucleic acid binding (GO:0003676),Molecular Function:exonuclease activity (GO:0004527)
CAFS_HM_T_00051723	1	Molecular Function:oxidoreductase activity (GO:0016491)
CAFS_HM_T_00020008	--	--
CAFS_HM_T_00009647	4	Molecular Function:GMP synthase (glutamine-hydrolyzing) activity (GO:0003922),Molecular Function:ATP binding (GO:0005524),Biological Process:purine nucleotide biosynthetic process (GO:0006164),Biological Process:GMP biosynthetic process (GO:0006177)
CAFS_HM_T_00017188	5	Molecular Function:structural constituent of ribosome (GO:0003735),Cellular Component:intracellular (GO:0005622),Cellular Component:ribosome (GO:0005840),Biological Process:translation (GO:0006412),Molecular Function:5S rRNA binding (GO:0008097)
CAFS_HM_T_00009747	1	Molecular Function:N-acetyltransferase activity (GO:0008080)
CAFS_HM_T_00058680	--	--
CAFS_HM_T_00034480	--	--
CAFS_HM_T_00018523	4	Biological Process:intracellular protein transport (GO:0006886),Biological Process:ER to Golgi vesicle-mediated transport (GO:0006888),Molecular Function:zinc ion binding (GO:0008270),Cellular Component:COPII vesicle coat (GO:0030127)
CAFS_HM_T_00085736	1	Molecular Function:GTP binding (GO:0005525)
CAFS_HM_T_00065429	4	Molecular Function:protein kinase activity (GO:0004672),Molecular Function:protein serine/threonine kinase activity (GO:0004674),Molecular Function:ATP binding (GO:0005524),Biological Process:protein phosphorylation (GO:0006468)
CAFS_HM_T_00055875	--	--
CAFS_HM_T_00070298	3	Molecular Function:catalytic activity (GO:0003824),Biological Process:metabolic process (GO:0008152),Molecular Function:cofactor binding (GO:0048037)
CAFS_HM_T_00088739	1	Molecular Function:calcium ion binding (GO:0005509)
CAFS_HM_T_00092004	3	Molecular Function:serine-type endopeptidase activity (GO:0004252),Biological Process:proteolysis (GO:0006508),Molecular Function:serine-type peptidase activity (GO:0008236)
CAFS_HM_T_00016084	4	Molecular Function:RNA binding (GO:0003723),Molecular Function:structural constituent of ribosome (GO:0003735),Cellular Component:ribosome (GO:0005840),Biological Process:translation (GO:0006412)
CAFS_HM_T_00018049	4	Molecular Function:nucleotide binding (GO:0000166),Molecular Function:aminoacyl-tRNA ligase activity (GO:0004812),Molecular Function:ATP binding (GO:0005524),Biological Process:tRNA aminoacylation for protein translation (GO:0006418)
CAFS_HM_T_00045124	3	Biological Process:metabolic process (GO:0008152),Molecular Function:oxidoreductase activity (GO:0016491),Biological Process:oxidation-reduction process (GO:0055114)
CAFS_HM_T_00028088	4	Molecular Function:serine-type endopeptidase activity (GO:0004252),Biological Process:proteolysis (GO:0006508),Molecular Function:serine-type peptidase activity (GO:0008236),Molecular Function:serine-type exopeptidase activity (GO:0070008)
CAFS_HM_T_00064081	1	Molecular Function:protein binding (GO:0005515)
CAFS_HM_T_00017527	--	--
CAFS_HM_T_00034377	2	Biological Process:proteolysis (GO:0006508),Molecular Function:dipeptidase activity (GO:0016805)
CAFS_HM_T_00012602	2	Molecular Function:oxygen binding (GO:0019825),Molecular Function:heme binding (GO:0020037)
CAFS_HM_T_00049206	4	Biological Process:intracellular protein transport (GO:0006886),Biological Process:vesicle-mediated transport (GO:0016192),Cellular Component:membrane coat (GO:0030117),Cellular Component:clathrin adaptor complex (GO:0030131)
CAFS_HM_T_00055945	2	Molecular Function:ATP binding (GO:0005524),Molecular Function:ATPase activity (GO:0016887)
CAFS_HM_T_00082670	2	Molecular Function:catalytic activity (GO:0003824),Biological Process:nucleoside metabolic process (GO:0009116)
CAFS_HM_T_00057589	1	Molecular Function:metal ion binding (GO:0046872)
CAFS_HM_T_00000636	3	Molecular Function:iron ion binding (GO:0005506),Molecular Function:heme binding (GO:0020037),Biological Process:oxidation-reduction process (GO:0055114)
CAFS_HM_T_00018595	2	Molecular Function:nucleic acid binding (GO:0003676),Molecular Function:RNA binding (GO:0003723)
CAFS_HM_T_00071620	2	Molecular Function:protein complex scaffold (GO:0032947),Biological Process:proteasome assembly (GO:0043248)
CAFS_HM_T_00062757	3	Biological Process:protein peptidyl-prolyl isomerization (GO:0000413),Molecular Function:peptidyl-prolyl cis-trans isomerase activity (GO:0003755),Biological Process:protein folding (GO:0006457)
CAFS_HM_T_00044595	3	Molecular Function:protein transporter activity (GO:0008565),Biological Process:protein transport (GO:0015031),Cellular Component:retromer complex (GO:0030904)
CAFS_HM_T_00070447	2	Molecular Function:nucleic acid binding (GO:0003676),Molecular Function:ATP binding (GO:0005524)
CAFS_HM_T_00077336	3	Molecular Function:catalytic activity (GO:0003824),Biological Process:carbohydrate metabolic process (GO:0005975),Molecular Function:cation binding (GO:0043169)
CAFS_HM_T_00008273	1	Molecular Function:hydrolase activity (GO:0016787)
CAFS_HM_T_00015634	3	Molecular Function:2',3'-cyclic-nucleotide 3'-phosphodiesterase activity (GO:0004113),Biological Process:cyclic nucleotide catabolic process (GO:0009214),Cellular Component:membrane (GO:0016020)
CAFS_HM_T_00029976	5	Molecular Function:glycerol-3-phosphate dehydrogenase [NAD+] activity (GO:0004367),Biological Process:carbohydrate metabolic process (GO:0005975),Biological Process:glycerol-3-phosphate catabolic process (GO:0046168),Molecular Function:NAD binding (GO:0051287),Biological Process:oxidation-reduction process (GO:0055114)
CAFS_HM_T_00073332	1	Biological Process:carbohydrate metabolic process (GO:0005975)
CAFS_HM_T_00024850	5	Molecular Function:serine-type endopeptidase activity (GO:0004252),Molecular Function:scavenger receptor activity (GO:0005044),Molecular Function:protein binding (GO:0005515),Biological Process:proteolysis (GO:0006508),Cellular Component:membrane (GO:0016020)
CAFS_HM_T_00070467	3	Molecular Function:nucleic acid binding (GO:0003676),Cellular Component:nucleus (GO:0005634),Biological Process:mRNA processing (GO:0006397)
CAFS_HM_T_00019248	--	--
CAFS_HM_T_00031224	4	Molecular Function:serine-type endopeptidase activity (GO:0004252),Biological Process:proteolysis (GO:0006508),Molecular Function:serine-type peptidase activity (GO:0008236),Molecular Function:serine-type exopeptidase activity (GO:0070008)
CAFS_HM_T_00005027	--	--
CAFS_HM_T_00009377	1	Molecular Function:protein binding (GO:0005515)
CAFS_HM_T_00043184	3	Molecular Function:electron carrier activity (GO:0009055),Molecular Function:protein disulfide oxidoreductase activity (GO:0015035),Biological Process:cell redox homeostasis (GO:0045454)
CAFS_HM_T_00006377	--	--
CAFS_HM_T_00070925	--	--
CAFS_HM_T_00052474	1	Molecular Function:starch binding (GO:2001070)
CAFS_HM_T_00065280	2	Molecular Function:metallopeptidase activity (GO:0008237),Molecular Function:zinc ion binding (GO:0008270)
CAFS_HM_T_00088449	--	--
CAFS_HM_T_00046550	3	Molecular Function:protein binding (GO:0005515),Molecular Function:metal ion binding (GO:0046872),Biological Process:oxidation-reduction process (GO:0055114)
CAFS_HM_T_00058131	2	Molecular Function:catalytic activity (GO:0003824),Biological Process:metabolic process (GO:0008152)
CAFS_HM_T_00049474	2	Molecular Function:RNA binding (GO:0003723),Biological Process:RNA processing (GO:0006396)
CAFS_HM_T_00060340	3	Molecular Function:fatty-acyl-CoA binding (GO:0000062),Molecular Function:catalytic activity (GO:0003824),Biological Process:metabolic process (GO:0008152)
CAFS_HM_T_00046921	1	Molecular Function:protein binding (GO:0005515)
CAFS_HM_T_00086819	--	--
CAFS_HM_T_00006597	2	Biological Process:metabolic process (GO:0008152),Molecular Function:hydrolase activity (GO:0016787)
CAFS_HM_T_00064915	3	Molecular Function:protein kinase activity (GO:0004672),Molecular Function:ATP binding (GO:0005524),Biological Process:protein phosphorylation (GO:0006468)
CAFS_HM_T_00009694	1	Biological Process:metabolic process (GO:0008152)
CAFS_HM_T_00004032	2	Molecular Function:methionine adenosyltransferase activity (GO:0004478),Biological Process:S-adenosylmethionine biosynthetic process (GO:0006556)
CAFS_HM_T_00071568	--	--
CAFS_HM_T_00006815	--	--
CAFS_HM_T_00064199	5	Molecular Function:endopeptidase activity (GO:0004175),Molecular Function:threonine-type endopeptidase activity (GO:0004298),Cellular Component:proteasome core complex (GO:0005839),Biological Process:ubiquitin-dependent protein catabolic process (GO:0006511),Biological Process:proteolysis involved in cellular protein catabolic process (GO:0051603)
CAFS_HM_T_00006990	1	Molecular Function:serine-type endopeptidase inhibitor activity (GO:0004867)
CAFS_HM_T_00073316	1	Molecular Function:methyltransferase activity (GO:0008168)
CAFS_HM_T_00080256	--	--
CAFS_HM_T_00069616	1	Molecular Function:small protein activating enzyme activity (GO:0008641)
CAFS_HM_T_00079234	1	Molecular Function:copper ion binding (GO:0005507)
CAFS_HM_T_00057814	--	--
CAFS_HM_T_00077687	--	--
CAFS_HM_T_00026905	--	--
CAFS_HM_T_00041762	--	--
CAFS_HM_T_00026579	--	--
CAFS_HM_T_00026816	2	Biological Process:RNA processing (GO:0006396),Molecular Function:RNA ligase activity (GO:0008452)
CAFS_HM_T_00019364	1	Molecular Function:calcium ion binding (GO:0005509)
CAFS_HM_T_00036942	2	Biological Process:cell adhesion (GO:0007155),Molecular Function:actin filament binding (GO:0051015)
CAFS_HM_T_00091213	--	--
CAFS_HM_T_00069422	2	Cellular Component:intracellular (GO:0005622),Biological Process:ribosome biogenesis (GO:0042254)
CAFS_HM_T_00057141	3	Molecular Function:glutathione synthase activity (GO:0004363),Molecular Function:ATP binding (GO:0005524),Biological Process:glutathione biosynthetic process (GO:0006750)
CAFS_HM_T_00019304	1	Molecular Function:nucleic acid binding (GO:0003676)
CAFS_HM_T_00062089	2	Molecular Function:catalytic activity (GO:0003824),Biological Process:metabolic process (GO:0008152)
CAFS_HM_T_00065807	1	Molecular Function:protein binding (GO:0005515)
CAFS_HM_T_00008618	1	Biological Process:metabolic process (GO:0008152)
CAFS_HM_T_00091900	1	Molecular Function:hydrolase activity (GO:0016787)
CAFS_HM_T_00042861	--	--
CAFS_HM_T_00084561	--	--
CAFS_HM_T_00054643	1	Molecular Function:protein binding (GO:0005515)
CAFS_HM_T_00081974	3	Molecular Function:iron ion binding (GO:0005506),Molecular Function:heme binding (GO:0020037),Biological Process:oxidation-reduction process (GO:0055114)
CAFS_HM_T_00051346	2	Molecular Function:actin binding (GO:0003779),Cellular Component:intracellular (GO:0005622)
CAFS_HM_T_00029911	4	Cellular Component:proteasome complex (GO:0000502),Molecular Function:protein binding (GO:0005515),Molecular Function:enzyme regulator activity (GO:0030234),Biological Process:regulation of protein catabolic process (GO:0042176)
CAFS_HM_T_00076677	--	--
CAFS_HM_T_00028007	2	Molecular Function:actin binding (GO:0003779),Biological Process:cytoskeleton organization (GO:0007010)
CAFS_HM_T_00027846	2	Molecular Function:nucleic acid binding (GO:0003676),Molecular Function:protein binding (GO:0005515)
CAFS_HM_T_00074958	4	Molecular Function:antioxidant activity (GO:0016209),Molecular Function:oxidoreductase activity (GO:0016491),Molecular Function:peroxiredoxin activity (GO:0051920),Biological Process:oxidation-reduction process (GO:0055114)
CAFS_HM_T_00011616	1	Molecular Function:metal ion binding (GO:0046872)
CAFS_HM_T_00040130	2	Cellular Component:mitochondrial outer membrane (GO:0005741),Biological Process:transmembrane transport (GO:0055085)
CAFS_HM_T_00029544	--	--
CAFS_HM_T_00090685	1	Biological Process:carbohydrate metabolic process (GO:0005975)
CAFS_HM_T_00005943	--	--
CAFS_HM_T_00004557	--	--
CAFS_HM_T_00007967	2	Molecular Function:GTP binding (GO:0005525),Biological Process:small GTPase mediated signal transduction (GO:0007264)
CAFS_HM_T_00041167	2	Biological Process:proteolysis (GO:0006508),Molecular Function:serine-type peptidase activity (GO:0008236)
CAFS_HM_T_00054675	--	--
CAFS_HM_T_00074762	--	--
CAFS_HM_T_00016582	--	--
CAFS_HM_T_00048841	--	--
CAFS_HM_T_00023145	2	Biological Process:carbohydrate metabolic process (GO:0005975),Molecular Function:isomerase activity (GO:0016853)
CAFS_HM_T_00077024	2	Molecular Function:nucleic acid binding (GO:0003676),Molecular Function:ATP binding (GO:0005524)
CAFS_HM_T_00019317	--	--
CAFS_HM_T_00003676	2	Molecular Function:structural molecule activity (GO:0005198),Cellular Component:intermediate filament (GO:0005882)
CAFS_HM_T_00077011	1	Molecular Function:RNA binding (GO:0003723)
CAFS_HM_T_00069561	--	--
CAFS_HM_T_00011576	--	--
CAFS_HM_T_00081148	2	Molecular Function:O-methyltransferase activity (GO:0008171),Molecular Function:nucleoside-triphosphate diphosphatase activity (GO:0047429)
CAFS_HM_T_00021736	2	Biological Process:protein targeting to Golgi (GO:0000042),Molecular Function:protein binding (GO:0005515)
CAFS_HM_T_00008491	--	--
CAFS_HM_T_00051077	2	Cellular Component:mitochondrial outer membrane (GO:0005741),Biological Process:transmembrane transport (GO:0055085)
CAFS_HM_T_00088094	2	Molecular Function:actin binding (GO:0003779),Molecular Function:phospholipid binding (GO:0005543)
CAFS_HM_T_00062063	2	Molecular Function:calcium ion binding (GO:0005509),Molecular Function:calcium-dependent phospholipid binding (GO:0005544)
CAFS_HM_T_00013276	1	Molecular Function:protein binding (GO:0005515)
CAFS_HM_T_00023138	--	--
CAFS_HM_T_00034209	1	Molecular Function:hydrolase activity (GO:0016787)
CAFS_HM_T_00026419	1	Molecular Function:calcium ion binding (GO:0005509)
CAFS_HM_T_00054687	--	--
CAFS_HM_T_00013580	1	Molecular Function:hydrolase activity (GO:0016787)
CAFS_HM_T_00008931	1	Molecular Function:deaminase activity (GO:0019239)
CAFS_HM_T_00071518	--	--
CAFS_HM_T_00085016	--	--
CAFS_HM_T_00057886	3	Molecular Function:structural constituent of ribosome (GO:0003735),Cellular Component:ribosome (GO:0005840),Biological Process:translation (GO:0006412)
CAFS_HM_T_00079193	1	Biological Process:ATP synthesis coupled proton transport (GO:0015986)
CAFS_HM_T_00008960	4	Molecular Function:ATP-dependent peptidase activity (GO:0004176),Molecular Function:serine-type endopeptidase activity (GO:0004252),Molecular Function:ATP binding (GO:0005524),Biological Process:proteolysis (GO:0006508)
CAFS_HM_T_00049273	3	Molecular Function:nucleic acid binding (GO:0003676),Molecular Function:helicase activity (GO:0004386),Molecular Function:ATP binding (GO:0005524)
CAFS_HM_T_00019105	1	Molecular Function:adenylate kinase activity (GO:0004017)
CAFS_HM_T_00049353	1	Molecular Function:hydrolase activity (GO:0016787)
CAFS_HM_T_00047132	2	Molecular Function:serine-type endopeptidase activity (GO:0004252),Biological Process:proteolysis (GO:0006508)
CAFS_HM_T_00021130	3	Molecular Function:serine-type endopeptidase activity (GO:0004252),Molecular Function:protein binding (GO:0005515),Biological Process:proteolysis (GO:0006508)
CAFS_HM_T_00079213	2	Molecular Function:nucleic acid binding (GO:0003676),Molecular Function:ATP binding (GO:0005524)
CAFS_HM_T_00050183	1	Biological Process:metabolic process (GO:0008152)
CAFS_HM_T_00069566	3	Molecular Function:iron ion binding (GO:0005506),Molecular Function:heme binding (GO:0020037),Biological Process:oxidation-reduction process (GO:0055114)
CAFS_HM_T_00037961	1	Molecular Function:protein binding (GO:0005515)
CAFS_HM_T_00084563	1	Molecular Function:serine-type endopeptidase inhibitor activity (GO:0004867)
CAFS_HM_T_00047068	2	Biological Process:metabolic process (GO:0008152),Molecular Function:acetyltransferase activity (GO:0016407)
CAFS_HM_T_00012421	--	--
CAFS_HM_T_00092375	3	Molecular Function:motor activity (GO:0003774),Molecular Function:ATP binding (GO:0005524),Cellular Component:myosin complex (GO:0016459)
CAFS_HM_T_00077479	5	Molecular Function:metalloendopeptidase activity (GO:0004222),Molecular Function:ATP binding (GO:0005524),Biological Process:proteolysis (GO:0006508),Molecular Function:zinc ion binding (GO:0008270),Cellular Component:integral component of membrane (GO:0016021)
CAFS_HM_T_00011702	--	--
CAFS_HM_T_00082246	1	Molecular Function:protein binding (GO:0005515)
CAFS_HM_T_00078506	2	Molecular Function:actin binding (GO:0003779),Biological Process:cytoskeleton organization (GO:0007010)
CAFS_HM_T_00018448	4	Molecular Function:acyl-CoA dehydrogenase activity (GO:0003995),Biological Process:metabolic process (GO:0008152),Molecular Function:flavin adenine dinucleotide binding (GO:0050660),Biological Process:oxidation-reduction process (GO:0055114)
CAFS_HM_T_00013460	--	--
CAFS_HM_T_00043428	1	Molecular Function:protein binding (GO:0005515)
CAFS_HM_T_00026047	2	Molecular Function:serine-type endopeptidase inhibitor activity (GO:0004867),Biological Process:hyaluronan metabolic process (GO:0030212)
CAFS_HM_T_00060098	--	--
CAFS_HM_T_00039442	1	Molecular Function:protein binding (GO:0005515)
CAFS_HM_T_00024062	4	Molecular Function:transporter activity (GO:0005215),Molecular Function:protein binding (GO:0005515),Biological Process:transport (GO:0006810),Cellular Component:membrane (GO:0016020)
CAFS_HM_T_00053545	--	--
CAFS_HM_T_00052904	--	--
CAFS_HM_T_00067071	4	Molecular Function:antioxidant activity (GO:0016209),Molecular Function:oxidoreductase activity (GO:0016491),Molecular Function:peroxiredoxin activity (GO:0051920),Biological Process:oxidation-reduction process (GO:0055114)
CAFS_HM_T_00018366	2	Molecular Function:catalytic activity (GO:0003824),Biological Process:metabolic process (GO:0008152)
CAFS_HM_T_00016532	1	Molecular Function:GTP binding (GO:0005525)
CAFS_HM_T_00072456	--	--
CAFS_HM_T_00024304	--	--
CAFS_HM_T_00085115	1	Molecular Function:ATP binding (GO:0005524)
CAFS_HM_T_00061616	4	Molecular Function:carboxypeptidase activity (GO:0004180),Molecular Function:metallocarboxypeptidase activity (GO:0004181),Biological Process:proteolysis (GO:0006508),Molecular Function:zinc ion binding (GO:0008270)
CAFS_HM_T_00008157	--	--
CAFS_HM_T_00017895	1	Molecular Function:small protein activating enzyme activity (GO:0008641)
CAFS_HM_T_00017479	2	Molecular Function:structural molecule activity (GO:0005198),Cellular Component:intermediate filament (GO:0005882)
CAFS_HM_T_00015174	--	--
CAFS_HM_T_00071613	3	Molecular Function:aminopeptidase activity (GO:0004177),Cellular Component:intracellular (GO:0005622),Biological Process:proteolysis (GO:0006508)
CAFS_HM_T_00083214	1	Molecular Function:arylesterase activity (GO:0004064)
CAFS_HM_T_00002484	--	--
CAFS_HM_T_00065097	--	--
CAFS_HM_T_00011977	--	--
CAFS_HM_T_00084241	1	Biological Process:isoprenoid biosynthetic process (GO:0008299)
CAFS_HM_T_00006976	1	Molecular Function:protein binding (GO:0005515)
CAFS_HM_T_00063185	1	Cellular Component:membrane (GO:0016020)
CAFS_HM_T_00032670	3	Cellular Component:cytoplasm (GO:0005737),Molecular Function:cytoskeletal protein binding (GO:0008092),Cellular Component:extrinsic component of membrane (GO:0019898)
CAFS_HM_T_00071580	2	Biological Process:carbohydrate metabolic process (GO:0005975),Biological Process:organic substance metabolic process (GO:0071704)
CAFS_HM_T_00037469	3	Molecular Function:translation elongation factor activity (GO:0003746),Molecular Function:protein binding (GO:0005515),Biological Process:translational elongation (GO:0006414)
CAFS_HM_T_00051644	2	Biological Process:carbohydrate metabolic process (GO:0005975),Molecular Function:glycogen phosphorylase activity (GO:0008184)
CAFS_HM_T_00001696	--	--
CAFS_HM_T_00016133	3	Molecular Function:aminopeptidase activity (GO:0004177),Cellular Component:intracellular (GO:0005622),Biological Process:proteolysis (GO:0006508)
CAFS_HM_T_00011903	1	Molecular Function:protein binding (GO:0005515)
CAFS_HM_T_00075789	3	Molecular Function:nucleic acid binding (GO:0003676),Molecular Function:helicase activity (GO:0004386),Molecular Function:ATP binding (GO:0005524)
CAFS_HM_T_00017817	2	Biological Process:proteolysis (GO:0006508),Molecular Function:cysteine-type peptidase activity (GO:0008234)
CAFS_HM_T_00078779	4	Molecular Function:3-hydroxyacyl-CoA dehydrogenase activity (GO:0003857),Biological Process:fatty acid metabolic process (GO:0006631),Molecular Function:oxidoreductase activity (GO:0016491),Biological Process:oxidation-reduction process (GO:0055114)
CAFS_HM_T_00053179	3	Molecular Function:glutathione peroxidase activity (GO:0004602),Biological Process:response to oxidative stress (GO:0006979),Biological Process:oxidation-reduction process (GO:0055114)
CAFS_HM_T_00086794	1	Molecular Function:calcium ion binding (GO:0005509)
CAFS_HM_T_00085144	4	Molecular Function:RNA binding (GO:0003723),Biological Process:rRNA processing (GO:0006364),Biological Process:tRNA processing (GO:0008033),Molecular Function:methyltransferase activity (GO:0008168)
CAFS_HM_T_00009409	--	--
CAFS_HM_T_00069658	2	Molecular Function:calcium ion binding (GO:0005509),Molecular Function:calcium-dependent phospholipid binding (GO:0005544)
CAFS_HM_T_00051499	2	Cellular Component:nuclear pore (GO:0005643),Biological Process:transport (GO:0006810)
CAFS_HM_T_00051946	1	Molecular Function:protein binding (GO:0005515)
CAFS_HM_T_00008161	--	--
CAFS_HM_T_00004330	2	Molecular Function:protein binding (GO:0005515),Molecular Function:zinc ion binding (GO:0008270)
CAFS_HM_T_00014740	1	Molecular Function:hydrolase activity (GO:0016787)
CAFS_HM_T_00060246	2	Molecular Function:calcium ion binding (GO:0005509),Molecular Function:calcium-dependent phospholipid binding (GO:0005544)
CAFS_HM_T_00000241	1	Molecular Function:protein binding (GO:0005515)
CAFS_HM_T_00020686	1	Molecular Function:phosphatidylinositol binding (GO:0035091)
CAFS_HM_T_00023350	1	Molecular Function:ribose-5-phosphate isomerase activity (GO:0004751)
CAFS_HM_T_00035741	3	Molecular Function:oxidoreductase activity (GO:0016491),Biological Process:cell redox homeostasis (GO:0045454),Biological Process:oxidation-reduction process (GO:0055114)
CAFS_HM_T_00046608	5	Molecular Function:protein kinase activity (GO:0004672),Molecular Function:calmodulin-dependent protein kinase activity (GO:0004683),Molecular Function:calmodulin binding (GO:0005516),Molecular Function:ATP binding (GO:0005524),Biological Process:protein phosphorylation (GO:0006468)
CAFS_HM_T_00069991	1	Molecular Function:RNA binding (GO:0003723)
CAFS_HM_T_00085825	2	Molecular Function:catalytic activity (GO:0003824),Biological Process:metabolic process (GO:0008152)
CAFS_HM_T_00011847	1	Molecular Function:GTP binding (GO:0005525)
CAFS_HM_T_00007088	2	Molecular Function:nucleic acid binding (GO:0003676),Molecular Function:ATP binding (GO:0005524)
CAFS_HM_T_00084054	--	--
CAFS_HM_T_00041965	1	Molecular Function:protein binding (GO:0005515)
CAFS_HM_T_00083067	--	--
CAFS_HM_T_00033022	1	Biological Process:metabolic process (GO:0008152)
CAFS_HM_T_00013037	3	Molecular Function:iron ion binding (GO:0005506),Molecular Function:heme binding (GO:0020037),Biological Process:oxidation-reduction process (GO:0055114)
CAFS_HM_T_00080722	1	Molecular Function:hydrolase activity (GO:0016787)
CAFS_HM_T_00043054	1	Molecular Function:acid phosphatase activity (GO:0003993)
CAFS_HM_T_00086699	2	Molecular Function:oxidoreductase activity (GO:0016491),Biological Process:oxidation-reduction process (GO:0055114)
CAFS_HM_T_00031822	2	Biological Process:allantoin catabolic process (GO:0000256),Molecular Function:allantoicase activity (GO:0004037)
CAFS_HM_T_00069393	3	Molecular Function:argininosuccinate synthase activity (GO:0004055),Molecular Function:ATP binding (GO:0005524),Biological Process:arginine biosynthetic process (GO:0006526)
CAFS_HM_T_00057231	2	Molecular Function:structural molecule activity (GO:0005198),Cellular Component:intermediate filament (GO:0005882)
CAFS_HM_T_00018725	1	Molecular Function:protein binding (GO:0005515)
CAFS_HM_T_00076349	6	Molecular Function:DNA binding (GO:0003677),Molecular Function:helicase activity (GO:0004386),Molecular Function:ATP binding (GO:0005524),Cellular Component:cytoplasm (GO:0005737),Molecular Function:zinc ion binding (GO:0008270),Molecular Function:hydrolase activity (GO:0016787)
CAFS_HM_T_00020202	3	Molecular Function:threonine-type endopeptidase activity (GO:0004298),Cellular Component:proteasome core complex (GO:0005839),Biological Process:proteolysis involved in cellular protein catabolic process (GO:0051603)
CAFS_HM_T_00061688	1	Molecular Function:DNA binding (GO:0003677)
CAFS_HM_T_00056573	--	--
CAFS_HM_T_00013316	--	--
CAFS_HM_T_00013914	1	Biological Process:oxidation-reduction process (GO:0055114)
CAFS_HM_T_00059190	1	Molecular Function:GTP binding (GO:0005525)
CAFS_HM_T_00015899	2	Molecular Function:nucleic acid binding (GO:0003676),Molecular Function:RNA binding (GO:0003723)
CAFS_HM_T_00022101	1	Biological Process:lipid metabolic process (GO:0006629)
CAFS_HM_T_00004114	3	Molecular Function:ATP binding (GO:0005524),Biological Process:proton transport (GO:0015992),Biological Process:ATP metabolic process (GO:0046034)
CAFS_HM_T_00059461	6	Molecular Function:RNA binding (GO:0003723),Molecular Function:translation elongation factor activity (GO:0003746),Biological Process:translational frameshifting (GO:0006452),Molecular Function:ribosome binding (GO:0043022),Biological Process:positive regulation of translational elongation (GO:0045901),Biological Process:positive regulation of translational termination (GO:0045905)
CAFS_HM_T_00070526	2	Molecular Function:oxidoreductase activity (GO:0016491),Biological Process:oxidation-reduction process (GO:0055114)
CAFS_HM_T_00003554	1	Molecular Function:ATP binding (GO:0005524)
CAFS_HM_T_00029546	5	Molecular Function:endopeptidase activity (GO:0004175),Molecular Function:threonine-type endopeptidase activity (GO:0004298),Cellular Component:proteasome core complex (GO:0005839),Biological Process:ubiquitin-dependent protein catabolic process (GO:0006511),Biological Process:proteolysis involved in cellular protein catabolic process (GO:0051603)
CAFS_HM_T_00033128	1	Molecular Function:protein binding (GO:0005515)
CAFS_HM_T_00016872	6	Molecular Function:protein kinase activity (GO:0004672),Molecular Function:protein serine/threonine kinase activity (GO:0004674),Molecular Function:protein binding (GO:0005515),Molecular Function:ATP binding (GO:0005524),Biological Process:protein phosphorylation (GO:0006468),Biological Process:intracellular signal transduction (GO:0035556)
CAFS_HM_T_00038844	4	Molecular Function:metalloendopeptidase activity (GO:0004222),Biological Process:proteolysis (GO:0006508),Molecular Function:zinc ion binding (GO:0008270),Cellular Component:extracellular matrix (GO:0031012)
CAFS_HM_T_00061160	1	Molecular Function:GTP binding (GO:0005525)
CAFS_HM_T_00080803	--	--
CAFS_HM_T_00081805	2	Molecular Function:ATP binding (GO:0005524),Molecular Function:ATPase activity (GO:0016887)
CAFS_HM_T_00069881	--	--
CAFS_HM_T_00080766	--	--
CAFS_HM_T_00036832	2	Molecular Function:ATP binding (GO:0005524),Molecular Function:ATPase activity (GO:0016887)
CAFS_HM_T_00021256	3	Molecular Function:translation initiation factor activity (GO:0003743),Cellular Component:cytoplasm (GO:0005737),Cellular Component:eukaryotic translation initiation factor 3 complex (GO:0005852)
CAFS_HM_T_00046251	1	Cellular Component:nucleus (GO:0005634)
CAFS_HM_T_00056859	2	Molecular Function:protein binding (GO:0005515),Molecular Function:zinc ion binding (GO:0008270)
CAFS_HM_T_00020940	2	Molecular Function:protein binding (GO:0005515),Molecular Function:zinc ion binding (GO:0008270)
CAFS_HM_T_00018477	--	--
CAFS_HM_T_00035945	2	Molecular Function:nucleotide binding (GO:0000166),Molecular Function:metal ion binding (GO:0046872)
CAFS_HM_T_00023185	2	Molecular Function:ARF guanyl-nucleotide exchange factor activity (GO:0005086),Biological Process:regulation of ARF protein signal transduction (GO:0032012)
CAFS_HM_T_00029706	3	Molecular Function:threonine-type endopeptidase activity (GO:0004298),Cellular Component:proteasome core complex (GO:0005839),Biological Process:proteolysis involved in cellular protein catabolic process (GO:0051603)
CAFS_HM_T_00056710	--	--
CAFS_HM_T_00059330	1	Molecular Function:protein binding (GO:0005515)
CAFS_HM_T_00055287	--	--
CAFS_HM_T_00076681	--	--
CAFS_HM_T_00035312	--	--
CAFS_HM_T_00023628	--	--
CAFS_HM_T_00040628	1	Biological Process:regulation of GTPase activity (GO:0043087)
CAFS_HM_T_00034784	2	Molecular Function:GTP binding (GO:0005525),Biological Process:small GTPase mediated signal transduction (GO:0007264)
CAFS_HM_T_00075449	3	Cellular Component:integral component of membrane (GO:0016021),Molecular Function:transmembrane transporter activity (GO:0022857),Biological Process:transmembrane transport (GO:0055085)
CAFS_HM_T_00054075	1	Molecular Function:protein binding (GO:0005515)
CAFS_HM_T_00090368	--	--
CAFS_HM_T_00055016	1	Biological Process:metabolic process (GO:0008152)
CAFS_HM_T_00089874	--	--
CAFS_HM_T_00026258	--	--
CAFS_HM_T_00008768	4	Molecular Function:protein binding (GO:0005515),Molecular Function:ATP binding (GO:0005524),Cellular Component:chromosome (GO:0005694),Biological Process:chromosome organization (GO:0051276)
CAFS_HM_T_00044087	1	Molecular Function:hydrolase activity (GO:0016787)
CAFS_HM_T_00068186	1	Molecular Function:protein binding (GO:0005515)
CAFS_HM_T_00052127	--	--
CAFS_HM_T_00057974	2	Cellular Component:endoplasmic reticulum membrane (GO:0005789),Biological Process:protein N-linked glycosylation via asparagine (GO:0018279)
CAFS_HM_T_00030647	2	Molecular Function:GTP binding (GO:0005525),Biological Process:small GTPase mediated signal transduction (GO:0007264)
CAFS_HM_T_00005452	5	Biological Process:intracellular protein transport (GO:0006886),Biological Process:protein transport (GO:0015031),Biological Process:vesicle-mediated transport (GO:0016192),Cellular Component:membrane coat (GO:0030117),Cellular Component:AP-3 adaptor complex (GO:0030123)
CAFS_HM_T_00024454	2	Molecular Function:oxidoreductase activity (GO:0016491),Biological Process:oxidation-reduction process (GO:0055114)
CAFS_HM_T_00049694	--	--
CAFS_HM_T_00034200	1	Molecular Function:nucleic acid binding (GO:0003676)
CAFS_HM_T_00024976	--	--
CAFS_HM_T_00026091	2	Molecular Function:catalytic activity (GO:0003824),Biological Process:metabolic process (GO:0008152)
CAFS_HM_T_00062017	1	Molecular Function:protein binding (GO:0005515)
CAFS_HM_T_00019253	1	Biological Process:nitrogen compound metabolic process (GO:0006807)
CAFS_HM_T_00071329	--	--
CAFS_HM_T_00029352	1	Molecular Function:protein binding (GO:0005515)
CAFS_HM_T_00075796	--	--
CAFS_HM_T_00020711	--	--
CAFS_HM_T_00054386	1	Molecular Function:small protein activating enzyme activity (GO:0008641)
CAFS_HM_T_00051731	3	Molecular Function:adenylosuccinate synthase activity (GO:0004019),Molecular Function:GTP binding (GO:0005525),Biological Process:purine nucleotide biosynthetic process (GO:0006164)
CAFS_HM_T_00073474	--	--
CAFS_HM_T_00009327	--	--
CAFS_HM_T_00036307	--	--
CAFS_HM_T_00006369	--	--
CAFS_HM_T_00067327	--	--
CAFS_HM_T_00069428	1	Biological Process:carbohydrate metabolic process (GO:0005975)
CAFS_HM_T_00007071	--	--
CAFS_HM_T_00029577	1	Molecular Function:adenylate kinase activity (GO:0004017)
CAFS_HM_T_00021812	--	--
CAFS_HM_T_00046845	1	Molecular Function:protein binding (GO:0005515)
CAFS_HM_T_00009206	2	Molecular Function:tropomyosin binding (GO:0005523),Biological Process:pointed-end actin filament capping (GO:0051694)
CAFS_HM_T_00016637	--	--
CAFS_HM_T_00072048	2	Molecular Function:oxygen binding (GO:0019825),Molecular Function:heme binding (GO:0020037)
CAFS_HM_T_00078103	--	--
CAFS_HM_T_00002200	--	--
CAFS_HM_T_00072192	2	Molecular Function:GTPase activity (GO:0003924),Molecular Function:GTP binding (GO:0005525)
CAFS_HM_T_00033135	4	Molecular Function:DNA binding (GO:0003677),Molecular Function:NAD+ ADP-ribosyltransferase activity (GO:0003950),Biological Process:protein ADP-ribosylation (GO:0006471),Molecular Function:zinc ion binding (GO:0008270)
CAFS_HM_T_00023055	4	Molecular Function:magnesium ion binding (GO:0000287),Molecular Function:catalytic activity (GO:0003824),Molecular Function:phosphoprotein phosphatase activity (GO:0004721),Molecular Function:manganese ion binding (GO:0030145)
CAFS_HM_T_00000544	2	Molecular Function:GTPase activity (GO:0003924),Molecular Function:GTP binding (GO:0005525)
CAFS_HM_T_00032155	--	--
CAFS_HM_T_00009751	2	Molecular Function:oxidoreductase activity (GO:0016491),Biological Process:oxidation-reduction process (GO:0055114)
CAFS_HM_T_00054211	3	Molecular Function:protein binding (GO:0005515),Biological Process:intracellular protein transport (GO:0006886),Molecular Function:Ran GTPase binding (GO:0008536)
CAFS_HM_T_00001865	5	Molecular Function:endopeptidase activity (GO:0004175),Molecular Function:threonine-type endopeptidase activity (GO:0004298),Cellular Component:proteasome core complex (GO:0005839),Biological Process:ubiquitin-dependent protein catabolic process (GO:0006511),Biological Process:proteolysis involved in cellular protein catabolic process (GO:0051603)
CAFS_HM_T_00029757	1	Molecular Function:palmitoyl hydrolase activity (GO:0098599)
CAFS_HM_T_00022484	4	Molecular Function:magnesium ion binding (GO:0000287),Molecular Function:catalytic activity (GO:0003824),Molecular Function:phosphoprotein phosphatase activity (GO:0004721),Molecular Function:manganese ion binding (GO:0030145)
CAFS_HM_T_00027955	--	--
CAFS_HM_T_00024372	--	--
CAFS_HM_T_00021265	4	Molecular Function:calcium-dependent cysteine-type endopeptidase activity (GO:0004198),Molecular Function:calcium ion binding (GO:0005509),Cellular Component:intracellular (GO:0005622),Biological Process:proteolysis (GO:0006508)
CAFS_HM_T_00086332	2	Molecular Function:catalytic activity (GO:0003824),Biological Process:carbohydrate metabolic process (GO:0005975)
CAFS_HM_T_00009902	--	--
CAFS_HM_T_00006758	--	--
CAFS_HM_T_00045148	--	--
CAFS_HM_T_00018392	3	Molecular Function:iron ion binding (GO:0005506),Molecular Function:heme binding (GO:0020037),Biological Process:oxidation-reduction process (GO:0055114)
CAFS_HM_T_00077329	--	--
CAFS_HM_T_00060041	5	Molecular Function:copper ion binding (GO:0005507),Molecular Function:primary amine oxidase activity (GO:0008131),Biological Process:amine metabolic process (GO:0009308),Molecular Function:quinone binding (GO:0048038),Biological Process:oxidation-reduction process (GO:0055114)
CAFS_HM_T_00029501	3	Biological Process:negative regulation of apoptotic process (GO:0043066),Biological Process:positive regulation of I-kappaB kinase/NF-kappaB signaling (GO:0043123),Biological Process:positive regulation of angiogenesis (GO:0045766)
CAFS_HM_T_00027127	--	--
CAFS_HM_T_00020070	4	Molecular Function:structural constituent of ribosome (GO:0003735),Molecular Function:protein binding (GO:0005515),Cellular Component:ribosome (GO:0005840),Biological Process:translation (GO:0006412)
CAFS_HM_T_00021331	3	Molecular Function:translation initiation factor activity (GO:0003743),Molecular Function:protein binding (GO:0005515),Biological Process:translational initiation (GO:0006413)
CAFS_HM_T_00072000	1	Molecular Function:endopeptidase inhibitor activity (GO:0004866)
CAFS_HM_T_00069966	2	Molecular Function:GTP binding (GO:0005525),Biological Process:small GTPase mediated signal transduction (GO:0007264)
CAFS_HM_T_00059317	5	Molecular Function:ATP binding (GO:0005524),Biological Process:transport (GO:0006810),Cellular Component:integral component of membrane (GO:0016021),Molecular Function:ATPase activity (GO:0016887),Biological Process:transmembrane transport (GO:0055085)
CAFS_HM_T_00040451	2	Cellular Component:F-actin capping protein complex (GO:0008290),Biological Process:barbed-end actin filament capping (GO:0051016)
CAFS_HM_T_00062281	2	Molecular Function:GTPase activity (GO:0003924),Molecular Function:GTP binding (GO:0005525)
CAFS_HM_T_00090195	2	Biological Process:intracellular protein transport (GO:0006886),Molecular Function:Ran GTPase binding (GO:0008536)
CAFS_HM_T_00052540	--	--
CAFS_HM_T_00060614	--	--
CAFS_HM_T_00067443	2	Molecular Function:catalytic activity (GO:0003824),Biological Process:metabolic process (GO:0008152)
CAFS_HM_T_00079714	1	Molecular Function:RNA binding (GO:0003723)
CAFS_HM_T_00090003	1	Molecular Function:phosphatidylinositol binding (GO:0035091)
CAFS_HM_T_00051558	--	--
CAFS_HM_T_00070004	2	Cellular Component:exosome (RNase complex) (GO:0000178),Molecular Function:RNA binding (GO:0003723)
CAFS_HM_T_00025707	1	Molecular Function:protein binding (GO:0005515)
CAFS_HM_T_00004853	3	Molecular Function:oligosaccharyl transferase activity (GO:0004576),Biological Process:protein glycosylation (GO:0006486),Cellular Component:membrane (GO:0016020)
CAFS_HM_T_00021922	1	Molecular Function:protein binding (GO:0005515)
CAFS_HM_T_00054414	--	--
CAFS_HM_T_00043664	4	Molecular Function:magnesium ion binding (GO:0000287),Molecular Function:catalytic activity (GO:0003824),Molecular Function:phosphoprotein phosphatase activity (GO:0004721),Molecular Function:manganese ion binding (GO:0030145)
CAFS_HM_T_00085566	1	Molecular Function:GTP binding (GO:0005525)
CAFS_HM_T_00048208	2	Biological Process:biosynthetic process (GO:0009058),Molecular Function:pyridoxal phosphate binding (GO:0030170)
CAFS_HM_T_00019699	2	Cellular Component:F-actin capping protein complex (GO:0008290),Biological Process:barbed-end actin filament capping (GO:0051016)
CAFS_HM_T_00015969	2	Molecular Function:nucleic acid binding (GO:0003676),Molecular Function:ATP binding (GO:0005524)
CAFS_HM_T_00045756	--	--
CAFS_HM_T_00081146	--	--
CAFS_HM_T_00000376	3	Molecular Function:iron ion binding (GO:0005506),Molecular Function:heme binding (GO:0020037),Biological Process:oxidation-reduction process (GO:0055114)
CAFS_HM_T_00063839	--	--
CAFS_HM_T_00038801	2	Molecular Function:GTP binding (GO:0005525),Biological Process:small GTPase mediated signal transduction (GO:0007264)
CAFS_HM_T_00042759	2	Molecular Function:fructose-bisphosphate aldolase activity (GO:0004332),Biological Process:glycolytic process (GO:0006096)
CAFS_HM_T_00062201	--	--
CAFS_HM_T_00066067	2	Biological Process:proteolysis (GO:0006508),Molecular Function:cysteine-type peptidase activity (GO:0008234)
CAFS_HM_T_00060161	1	Biological Process:cell redox homeostasis (GO:0045454)
CAFS_HM_T_00088954	2	Biological Process:proteolysis (GO:0006508),Molecular Function:cysteine-type peptidase activity (GO:0008234)
CAFS_HM_T_00033503	--	--
CAFS_HM_T_00077233	3	Molecular Function:protein tyrosine phosphatase activity (GO:0004725),Molecular Function:protein binding (GO:0005515),Biological Process:protein dephosphorylation (GO:0006470)
CAFS_HM_T_00033619	--	--
CAFS_HM_T_00089457	2	Molecular Function:alpha-L-fucosidase activity (GO:0004560),Biological Process:carbohydrate metabolic process (GO:0005975)
CAFS_HM_T_00078069	--	--
CAFS_HM_T_00074163	--	--
CAFS_HM_T_00010304	--	--
CAFS_HM_T_00079621	1	Molecular Function:ADP-dependent NAD(P)H-hydrate dehydratase activity (GO:0052855)
CAFS_HM_T_00087635	2	Biological Process:ubiquitin-dependent protein catabolic process (GO:0006511),Molecular Function:ubiquitin protein ligase binding (GO:0031625)
CAFS_HM_T_00015619	--	--
CAFS_HM_T_00083396	2	Molecular Function:deoxyribonuclease II activity (GO:0004531),Biological Process:DNA metabolic process (GO:0006259)
CAFS_HM_T_00055315	4	Cellular Component:extracellular region (GO:0005576),Biological Process:carbohydrate metabolic process (GO:0005975),Biological Process:chitin metabolic process (GO:0006030),Molecular Function:chitin binding (GO:0008061)
CAFS_HM_T_00075842	--	--
CAFS_HM_T_00011210	1	Molecular Function:calcium ion binding (GO:0005509)
CAFS_HM_T_00044586	2	Molecular Function:heat shock protein binding (GO:0031072),Molecular Function:unfolded protein binding (GO:0051082)
CAFS_HM_T_00072939	3	Cellular Component:endoplasmic reticulum (GO:0005783),Molecular Function:heparin binding (GO:0008201),Molecular Function:low-density lipoprotein particle receptor binding (GO:0050750)
CAFS_HM_T_00057848	1	Molecular Function:protein binding (GO:0005515)
CAFS_HM_T_00054653	1	Molecular Function:GTP binding (GO:0005525)
CAFS_HM_T_00049825	2	Biological Process:carbohydrate metabolic process (GO:0005975),Molecular Function:carbohydrate binding (GO:0030246)
CAFS_HM_T_00036407	5	Molecular Function:ATP binding (GO:0005524),Biological Process:transport (GO:0006810),Cellular Component:integral component of membrane (GO:0016021),Molecular Function:ATPase activity (GO:0016887),Biological Process:transmembrane transport (GO:0055085)
CAFS_HM_T_00050946	--	--
CAFS_HM_T_00016082	--	--
CAFS_HM_T_00054486	2	Molecular Function:calcium ion binding (GO:0005509),Molecular Function:nucleoside-diphosphatase activity (GO:0017110)
CAFS_HM_T_00069169	2	Molecular Function:methionine adenosyltransferase activity (GO:0004478),Biological Process:S-adenosylmethionine biosynthetic process (GO:0006556)
CAFS_HM_T_00064077	2	Molecular Function:metallopeptidase activity (GO:0008237),Molecular Function:zinc ion binding (GO:0008270)
CAFS_HM_T_00007163	2	Molecular Function:oxidoreductase activity (GO:0016491),Biological Process:oxidation-reduction process (GO:0055114)
CAFS_HM_T_00067097	2	Molecular Function:phospholipase activity (GO:0004620),Biological Process:phospholipid catabolic process (GO:0009395)
CAFS_HM_T_00062420	--	--
CAFS_HM_T_00046337	2	Molecular Function:transaminase activity (GO:0008483),Molecular Function:pyridoxal phosphate binding (GO:0030170)
CAFS_HM_T_00010579	4	Molecular Function:protein kinase activity (GO:0004672),Molecular Function:protein serine/threonine kinase activity (GO:0004674),Molecular Function:ATP binding (GO:0005524),Biological Process:protein phosphorylation (GO:0006468)
CAFS_HM_T_00042199	--	--
CAFS_HM_T_00085525	2	Molecular Function:GTP binding (GO:0005525),Biological Process:small GTPase mediated signal transduction (GO:0007264)
CAFS_HM_T_00017820	1	Molecular Function:GTPase activity (GO:0003924)
CAFS_HM_T_00085217	5	Molecular Function:endopeptidase activity (GO:0004175),Molecular Function:threonine-type endopeptidase activity (GO:0004298),Cellular Component:proteasome core complex (GO:0005839),Biological Process:ubiquitin-dependent protein catabolic process (GO:0006511),Biological Process:proteolysis involved in cellular protein catabolic process (GO:0051603)
CAFS_HM_T_00062847	--	--
CAFS_HM_T_00039346	2	Molecular Function:GTP binding (GO:0005525),Biological Process:small GTPase mediated signal transduction (GO:0007264)
CAFS_HM_T_00016265	3	Molecular Function:threonine-type endopeptidase activity (GO:0004298),Cellular Component:proteasome core complex (GO:0005839),Biological Process:proteolysis involved in cellular protein catabolic process (GO:0051603)
CAFS_HM_T_00037605	1	Molecular Function:protein binding (GO:0005515)
CAFS_HM_T_00046853	4	Biological Process:intracellular protein transport (GO:0006886),Biological Process:ER to Golgi vesicle-mediated transport (GO:0006888),Molecular Function:zinc ion binding (GO:0008270),Cellular Component:COPII vesicle coat (GO:0030127)
CAFS_HM_T_00080372	--	--
CAFS_HM_T_00019858	1	Molecular Function:protein binding (GO:0005515)
CAFS_HM_T_00036302	3	Molecular Function:ubiquitin-protein transferase activity (GO:0004842),Molecular Function:protein binding (GO:0005515),Biological Process:protein ubiquitination (GO:0016567)
CAFS_HM_T_00000158	--	--
CAFS_HM_T_00048488	2	Molecular Function:GTP binding (GO:0005525),Biological Process:small GTPase mediated signal transduction (GO:0007264)
CAFS_HM_T_00054461	2	Molecular Function:nucleic acid binding (GO:0003676),Molecular Function:ATP binding (GO:0005524)
CAFS_HM_T_00073258	1	Cellular Component:integral component of membrane (GO:0016021)
CAFS_HM_T_00076854	1	Molecular Function:GTP binding (GO:0005525)
CAFS_HM_T_00078726	1	Molecular Function:NAD+ ADP-ribosyltransferase activity (GO:0003950)
CAFS_HM_T_00047267	1	Molecular Function:protein binding (GO:0005515)
CAFS_HM_T_00085009	--	--
CAFS_HM_T_00088720	3	Molecular Function:GTP binding (GO:0005525),Biological Process:signal transduction (GO:0007165),Biological Process:small GTPase mediated signal transduction (GO:0007264)
CAFS_HM_T_00066920	1	Biological Process:metabolic process (GO:0008152)
CAFS_HM_T_00070057	2	Biological Process:intracellular protein transport (GO:0006886),Molecular Function:Ran GTPase binding (GO:0008536)
CAFS_HM_T_00084142	3	Molecular Function:phosphogluconate dehydrogenase (decarboxylating) activity (GO:0004616),Molecular Function:NAD binding (GO:0051287),Biological Process:oxidation-reduction process (GO:0055114)
CAFS_HM_T_00084904	3	Cellular Component:cytoskeleton (GO:0005856),Molecular Function:cytoskeletal protein binding (GO:0008092),Biological Process:cortical actin cytoskeleton organization (GO:0030866)
CAFS_HM_T_00086814	1	Molecular Function:endopeptidase inhibitor activity (GO:0004866)
CAFS_HM_T_00089892	--	--
CAFS_HM_T_00075450	6	Molecular Function:RNA binding (GO:0003723),Molecular Function:translation elongation factor activity (GO:0003746),Biological Process:translational frameshifting (GO:0006452),Molecular Function:ribosome binding (GO:0043022),Biological Process:positive regulation of translational elongation (GO:0045901),Biological Process:positive regulation of translational termination (GO:0045905)
CAFS_HM_T_00061570	1	Molecular Function:protein binding (GO:0005515)
CAFS_HM_T_00016387	2	Molecular Function:translation elongation factor activity (GO:0003746),Biological Process:translational elongation (GO:0006414)
CAFS_HM_T_00004178	--	--
CAFS_HM_T_00034176	5	Molecular Function:actin binding (GO:0003779),Molecular Function:structural molecule activity (GO:0005198),Cellular Component:cytoskeleton (GO:0005856),Molecular Function:cytoskeletal protein binding (GO:0008092),Biological Process:cortical actin cytoskeleton organization (GO:0030866)
CAFS_HM_T_00013385	3	Molecular Function:structural constituent of ribosome (GO:0003735),Cellular Component:ribosome (GO:0005840),Biological Process:translation (GO:0006412)
CAFS_HM_T_00080729	--	--
CAFS_HM_T_00076395	2	Molecular Function:catalytic activity (GO:0003824),Biological Process:metabolic process (GO:0008152)
CAFS_HM_T_00075486	--	--
CAFS_HM_T_00070290	--	--
CAFS_HM_T_00015738	--	--
CAFS_HM_T_00078662	2	Molecular Function:glutaminase activity (GO:0004359),Biological Process:glutamine metabolic process (GO:0006541)
CAFS_HM_T_00070898	--	--
CAFS_HM_T_00036451	3	Molecular Function:3-beta-hydroxy-delta5-steroid dehydrogenase activity (GO:0003854),Biological Process:steroid biosynthetic process (GO:0006694),Biological Process:oxidation-reduction process (GO:0055114)
CAFS_HM_T_00005385	--	--
CAFS_HM_T_00064019	1	Molecular Function:small protein activating enzyme activity (GO:0008641)
CAFS_HM_T_00078916	3	Molecular Function:folic acid binding (GO:0005542),Biological Process:metabolic process (GO:0008152),Molecular Function:transferase activity (GO:0016740)
CAFS_HM_T_00064652	1	Biological Process:metabolic process (GO:0008152)
CAFS_HM_T_00064650	1	Biological Process:metabolic process (GO:0008152)
CAFS_HM_T_00026214	2	Molecular Function:catalytic activity (GO:0003824),Biological Process:oxidation-reduction process (GO:0055114)
CAFS_HM_T_00081621	4	Molecular Function:catalytic activity (GO:0003824),Molecular Function:oxidoreductase activity (GO:0016491),Molecular Function:flavin adenine dinucleotide binding (GO:0050660),Biological Process:oxidation-reduction process (GO:0055114)
CAFS_HM_T_00041384	2	Cellular Component:mitochondrial outer membrane (GO:0005741),Biological Process:transmembrane transport (GO:0055085)
CAFS_HM_T_00001446	2	Molecular Function:oxidoreductase activity (GO:0016491),Biological Process:oxidation-reduction process (GO:0055114)
CAFS_HM_T_00038668	--	--
CAFS_HM_T_00075113	5	Molecular Function:structural constituent of ribosome (GO:0003735),Cellular Component:intracellular (GO:0005622),Cellular Component:ribosome (GO:0005840),Biological Process:translation (GO:0006412),Molecular Function:5S rRNA binding (GO:0008097)
CAFS_HM_T_00083374	4	Molecular Function:squalene monooxygenase activity (GO:0004506),Cellular Component:integral component of membrane (GO:0016021),Molecular Function:flavin adenine dinucleotide binding (GO:0050660),Biological Process:oxidation-reduction process (GO:0055114)
CAFS_HM_T_00083083	1	Biological Process:cell redox homeostasis (GO:0045454)
CAFS_HM_T_00006691	2	Biological Process:metabolic process (GO:0008152),Molecular Function:lyase activity (GO:0016829)
CAFS_HM_T_00040808	--	--
CAFS_HM_T_00040120	5	Molecular Function:structural molecule activity (GO:0005198),Biological Process:intracellular protein transport (GO:0006886),Biological Process:vesicle-mediated transport (GO:0016192),Cellular Component:clathrin coat of trans-Golgi network vesicle (GO:0030130),Cellular Component:clathrin coat of coated pit (GO:0030132)
CAFS_HM_T_00034469	5	Molecular Function:endopeptidase activity (GO:0004175),Molecular Function:threonine-type endopeptidase activity (GO:0004298),Cellular Component:proteasome core complex (GO:0005839),Biological Process:ubiquitin-dependent protein catabolic process (GO:0006511),Biological Process:proteolysis involved in cellular protein catabolic process (GO:0051603)
CAFS_HM_T_00010021	4	Molecular Function:ATP-dependent peptidase activity (GO:0004176),Molecular Function:serine-type endopeptidase activity (GO:0004252),Molecular Function:ATP binding (GO:0005524),Biological Process:proteolysis (GO:0006508)
CAFS_HM_T_00064354	--	--
CAFS_HM_T_00084441	--	--
CAFS_HM_T_00089903	5	Molecular Function:endopeptidase activity (GO:0004175),Molecular Function:threonine-type endopeptidase activity (GO:0004298),Cellular Component:proteasome core complex (GO:0005839),Biological Process:ubiquitin-dependent protein catabolic process (GO:0006511),Biological Process:proteolysis involved in cellular protein catabolic process (GO:0051603)
CAFS_HM_T_00042766	4	Molecular Function:translation initiation factor activity (GO:0003743),Cellular Component:eukaryotic translation initiation factor 3 complex (GO:0005852),Biological Process:translational initiation (GO:0006413),Molecular Function:translation initiation factor binding (GO:0031369)
CAFS_HM_T_00054805	4	Cellular Component:nucleosome (GO:0000786),Molecular Function:DNA binding (GO:0003677),Cellular Component:nucleus (GO:0005634),Biological Process:nucleosome assembly (GO:0006334)
CAFS_HM_T_00013034	1	Molecular Function:protein binding (GO:0005515)
CAFS_HM_T_00034948	--	--
CAFS_HM_T_00042301	1	Molecular Function:sulfate adenylyltransferase (ATP) activity (GO:0004781)
CAFS_HM_T_00046808	--	--
CAFS_HM_T_00075465	1	Molecular Function:nucleic acid binding (GO:0003676)
CAFS_HM_T_00080480	1	Molecular Function:3-hydroxyisobutyryl-CoA hydrolase activity (GO:0003860)
CAFS_HM_T_00064907	--	--
CAFS_HM_T_00012652	--	--
CAFS_HM_T_00014677	2	Molecular Function:nucleotide binding (GO:0000166),Molecular Function:metal ion binding (GO:0046872)
CAFS_HM_T_00019221	2	Biological Process:metabolic process (GO:0008152),Molecular Function:uridylyltransferase activity (GO:0070569)
CAFS_HM_T_00000185	--	--
CAFS_HM_T_00058041	2	Molecular Function:GDP-dissociation inhibitor activity (GO:0005092),Biological Process:small GTPase mediated signal transduction (GO:0007264)
CAFS_HM_T_00040368	1	Biological Process:carbohydrate metabolic process (GO:0005975)
CAFS_HM_T_00010377	1	Molecular Function:RNA binding (GO:0003723)
CAFS_HM_T_00072570	--	--
CAFS_HM_T_00057012	4	Molecular Function:protein binding (GO:0005515),Molecular Function:ATP binding (GO:0005524),Cellular Component:chromosome (GO:0005694),Biological Process:chromosome organization (GO:0051276)
CAFS_HM_T_00078759	1	Molecular Function:oxidoreductase activity (GO:0016491)
CAFS_HM_T_00077445	1	Molecular Function:GTP binding (GO:0005525)
CAFS_HM_T_00052996	--	--
CAFS_HM_T_00038258	1	Molecular Function:zinc ion binding (GO:0008270)
CAFS_HM_T_00062620	1	Molecular Function:protein binding (GO:0005515)
CAFS_HM_T_00046816	3	Molecular Function:nucleic acid binding (GO:0003676),Molecular Function:helicase activity (GO:0004386),Molecular Function:ATP binding (GO:0005524)
CAFS_HM_T_00042487	--	--
CAFS_HM_T_00011827	--	--
CAFS_HM_T_00084823	--	--
CAFS_HM_T_00085854	1	Molecular Function:nucleic acid binding (GO:0003676)
CAFS_HM_T_00002793	2	Molecular Function:nucleic acid binding (GO:0003676),Molecular Function:ATP binding (GO:0005524)
CAFS_HM_T_00064560	1	Molecular Function:protein binding (GO:0005515)
CAFS_HM_T_00034604	3	Molecular Function:iron ion binding (GO:0005506),Molecular Function:heme binding (GO:0020037),Biological Process:oxidation-reduction process (GO:0055114)
CAFS_HM_T_00084791	2	Biological Process:proteolysis (GO:0006508),Molecular Function:cysteine-type peptidase activity (GO:0008234)
CAFS_HM_T_00053489	1	Molecular Function:protein binding (GO:0005515)
CAFS_HM_T_00035629	3	Molecular Function:protein kinase activity (GO:0004672),Molecular Function:ATP binding (GO:0005524),Biological Process:protein phosphorylation (GO:0006468)
CAFS_HM_T_00055544	1	Molecular Function:protein binding (GO:0005515)
CAFS_HM_T_00085019	4	Cellular Component:extracellular region (GO:0005576),Biological Process:lipid transport (GO:0006869),Molecular Function:lipid binding (GO:0008289),Biological Process:lipoprotein metabolic process (GO:0042157)
CAFS_HM_T_00078804	--	--
CAFS_HM_T_00031271	2	Biological Process:transport (GO:0006810),Cellular Component:integral component of membrane (GO:0016021)
CAFS_HM_T_00033271	--	--
CAFS_HM_T_00078090	2	Biological Process:protein methylation (GO:0006479),Molecular Function:methyltransferase activity (GO:0008168)
CAFS_HM_T_00021273	4	Molecular Function:calcium-dependent cysteine-type endopeptidase activity (GO:0004198),Molecular Function:calcium ion binding (GO:0005509),Cellular Component:intracellular (GO:0005622),Biological Process:proteolysis (GO:0006508)
CAFS_HM_T_00091649	--	--
CAFS_HM_T_00047319	--	--
CAFS_HM_T_00023042	--	--
CAFS_HM_T_00048637	1	Molecular Function:DNA binding (GO:0003677)
CAFS_HM_T_00063425	1	Molecular Function:protein binding (GO:0005515)
CAFS_HM_T_00022741	1	Molecular Function:protein binding (GO:0005515)
CAFS_HM_T_00021313	1	Molecular Function:DNA binding (GO:0003677)
CAFS_HM_T_00086072	--	--
CAFS_HM_T_00030303	2	Molecular Function:structural molecule activity (GO:0005198),Cellular Component:intermediate filament (GO:0005882)
CAFS_HM_T_00042664	2	Molecular Function:ATP binding (GO:0005524),Biological Process:tRNA aminoacylation (GO:0043039)
CAFS_HM_T_00030719	1	Molecular Function:protein binding (GO:0005515)
CAFS_HM_T_00066835	2	Molecular Function:GTP binding (GO:0005525),Biological Process:small GTPase mediated signal transduction (GO:0007264)
CAFS_HM_T_00015571	2	Molecular Function:catalytic activity (GO:0003824),Biological Process:metabolic process (GO:0008152)
CAFS_HM_T_00064735	--	--
CAFS_HM_T_00061583	1	Molecular Function:GTPase activity (GO:0003924)
CAFS_HM_T_00035656	3	Biological Process:metabolic process (GO:0008152),Molecular Function:NAD binding (GO:0051287),Biological Process:oxidation-reduction process (GO:0055114)
CAFS_HM_T_00005959	2	Cellular Component:F-actin capping protein complex (GO:0008290),Biological Process:barbed-end actin filament capping (GO:0051016)
CAFS_HM_T_00010167	2	Biological Process:fatty acid biosynthetic process (GO:0006633),Molecular Function:malonyl-CoA decarboxylase activity (GO:0050080)
CAFS_HM_T_00006426	--	--
CAFS_HM_T_00026863	--	--
CAFS_HM_T_00057696	--	--
CAFS_HM_T_00090222	2	Molecular Function:oxidoreductase activity (GO:0016491),Biological Process:oxidation-reduction process (GO:0055114)
CAFS_HM_T_00003342	2	Cellular Component:mitochondrial outer membrane (GO:0005741),Biological Process:transmembrane transport (GO:0055085)
CAFS_HM_T_00091181	1	Molecular Function:protein binding (GO:0005515)
CAFS_HM_T_00061552	2	Biological Process:ubiquitin-dependent protein catabolic process (GO:0006511),Molecular Function:ubiquitin protein ligase binding (GO:0031625)
CAFS_HM_T_00044001	2	Molecular Function:actin binding (GO:0003779),Biological Process:cytoskeleton organization (GO:0007010)
CAFS_HM_T_00050342	--	--
CAFS_HM_T_00059838	1	Molecular Function:hydrolase activity (GO:0016787)
CAFS_HM_T_00017701	4	Molecular Function:glucose-6-phosphate dehydrogenase activity (GO:0004345),Biological Process:glucose metabolic process (GO:0006006),Molecular Function:NADP binding (GO:0050661),Biological Process:oxidation-reduction process (GO:0055114)
CAFS_HM_T_00055671	2	Molecular Function:GTP binding (GO:0005525),Biological Process:small GTPase mediated signal transduction (GO:0007264)
CAFS_HM_T_00006293	2	Molecular Function:poly(ADP-ribose) glycohydrolase activity (GO:0004649),Biological Process:carbohydrate metabolic process (GO:0005975)
CAFS_HM_T_00024315	2	Molecular Function:GTP binding (GO:0005525),Biological Process:small GTPase mediated signal transduction (GO:0007264)
CAFS_HM_T_00067401	3	Molecular Function:scavenger receptor activity (GO:0005044),Biological Process:immune response (GO:0006955),Molecular Function:polysaccharide binding (GO:0030247)
CAFS_HM_T_00049442	1	Molecular Function:GTP binding (GO:0005525)
CAFS_HM_T_00043530	--	--
CAFS_HM_T_00017194	3	Cellular Component:sodium:potassium-exchanging ATPase complex (GO:0005890),Biological Process:potassium ion transport (GO:0006813),Biological Process:sodium ion transport (GO:0006814)
CAFS_HM_T_00021542	1	Biological Process:oxidation-reduction process (GO:0055114)
CAFS_HM_T_00082451	--	--
CAFS_HM_T_00074511	2	Molecular Function:protein binding (GO:0005515),Molecular Function:lipid binding (GO:0008289)
CAFS_HM_T_00017543	2	Molecular Function:DNA helicase activity (GO:0003678),Molecular Function:ATP binding (GO:0005524)
CAFS_HM_T_00046281	1	Molecular Function:protein binding (GO:0005515)
CAFS_HM_T_00010681	6	Molecular Function:GTPase activity (GO:0003924),Molecular Function:signal recognition particle binding (GO:0005047),Molecular Function:GTP binding (GO:0005525),Cellular Component:signal recognition particle receptor complex (GO:0005785),Biological Process:SRP-dependent cotranslational protein targeting to membrane (GO:0006614),Biological Process:intracellular protein transport (GO:0006886)
CAFS_HM_T_00005877	--	--
CAFS_HM_T_00007620	1	Molecular Function:protein binding (GO:0005515)
CAFS_HM_T_00017438	--	--
CAFS_HM_T_00005238	2	Biological Process:proteolysis (GO:0006508),Molecular Function:serine-type peptidase activity (GO:0008236)
CAFS_HM_T_00090492	1	Molecular Function:protein binding (GO:0005515)
CAFS_HM_T_00048864	1	Molecular Function:calcium ion binding (GO:0005509)
CAFS_HM_T_00015652	2	Molecular Function:GTP binding (GO:0005525),Biological Process:small GTPase mediated signal transduction (GO:0007264)
CAFS_HM_T_00041469	2	Molecular Function:oxidoreductase activity (GO:0016491),Biological Process:oxidation-reduction process (GO:0055114)
CAFS_HM_T_00018609	--	--
CAFS_HM_T_00028967	1	Molecular Function:protein binding (GO:0005515)
CAFS_HM_T_00013419	5	Molecular Function:copper ion binding (GO:0005507),Molecular Function:primary amine oxidase activity (GO:0008131),Biological Process:amine metabolic process (GO:0009308),Molecular Function:quinone binding (GO:0048038),Biological Process:oxidation-reduction process (GO:0055114)
CAFS_HM_T_00063788	4	Molecular Function:protein kinase activity (GO:0004672),Molecular Function:protein binding (GO:0005515),Biological Process:protein phosphorylation (GO:0006468),Cellular Component:membrane (GO:0016020)
CAFS_HM_T_00036138	--	--
CAFS_HM_T_00049356	1	Biological Process:ubiquitin-dependent protein catabolic process (GO:0006511)
CAFS_HM_T_00057694	--	--
CAFS_HM_T_00050973	1	Biological Process:cell redox homeostasis (GO:0045454)
CAFS_HM_T_00084171	1	Molecular Function:protein binding (GO:0005515)
CAFS_HM_T_00020828	2	Molecular Function:oxidoreductase activity (GO:0016491),Biological Process:oxidation-reduction process (GO:0055114)
CAFS_HM_T_00014748	4	Molecular Function:acyl-CoA dehydrogenase activity (GO:0003995),Biological Process:metabolic process (GO:0008152),Molecular Function:flavin adenine dinucleotide binding (GO:0050660),Biological Process:oxidation-reduction process (GO:0055114)
CAFS_HM_T_00045652	3	Molecular Function:ubiquinol-cytochrome-c reductase activity (GO:0008121),Molecular Function:oxidoreductase activity (GO:0016491),Biological Process:oxidation-reduction process (GO:0055114)
CAFS_HM_T_00017826	2	Molecular Function:translation initiation factor activity (GO:0003743),Biological Process:translational initiation (GO:0006413)
CAFS_HM_T_00090784	--	--
CAFS_HM_T_00013500	2	Molecular Function:nucleic acid binding (GO:0003676),Molecular Function:ATP binding (GO:0005524)
CAFS_HM_T_00021009	--	--
CAFS_HM_T_00067460	1	Biological Process:intracellular transport (GO:0046907)
CAFS_HM_T_00069052	--	--
CAFS_HM_T_00092057	3	Molecular Function:ubiquitin-protein transferase activity (GO:0004842),Biological Process:protein ubiquitination (GO:0016567),Molecular Function:metal ion binding (GO:0046872)
CAFS_HM_T_00029282	1	Molecular Function:phosphoric ester hydrolase activity (GO:0042578)
CAFS_HM_T_00081028	--	--
CAFS_HM_T_00030835	2	Molecular Function:CTP synthase activity (GO:0003883),Biological Process:pyrimidine nucleotide biosynthetic process (GO:0006221)
CAFS_HM_T_00009561	3	Molecular Function:iron ion binding (GO:0005506),Molecular Function:heme binding (GO:0020037),Biological Process:oxidation-reduction process (GO:0055114)
CAFS_HM_T_00062026	1	Molecular Function:ATP binding (GO:0005524)
CAFS_HM_T_00064381	3	Molecular Function:mannose-6-phosphate isomerase activity (GO:0004476),Biological Process:carbohydrate metabolic process (GO:0005975),Molecular Function:zinc ion binding (GO:0008270)
CAFS_HM_T_00053010	--	--
CAFS_HM_T_00011558	2	Cellular Component:nuclear pore (GO:0005643),Biological Process:transport (GO:0006810)
CAFS_HM_T_00080750	1	Molecular Function:serine-type endopeptidase inhibitor activity (GO:0004867)
CAFS_HM_T_00087698	1	Molecular Function:protein binding (GO:0005515)
CAFS_HM_T_00062519	4	Molecular Function:catalytic activity (GO:0003824),Molecular Function:oxidoreductase activity (GO:0016491),Molecular Function:flavin adenine dinucleotide binding (GO:0050660),Biological Process:oxidation-reduction process (GO:0055114)
CAFS_HM_T_00040428	2	Molecular Function:protein tyrosine phosphatase activity (GO:0004725),Biological Process:protein dephosphorylation (GO:0006470)
CAFS_HM_T_00043781	3	Molecular Function:DNA binding (GO:0003677),Molecular Function:DNA-directed 5'-3' RNA polymerase activity (GO:0003899),Biological Process:transcription from RNA polymerase II promoter (GO:0006366)
CAFS_HM_T_00084880	3	Molecular Function:calcium ion binding (GO:0005509),Biological Process:homophilic cell adhesion via plasma membrane adhesion molecules (GO:0007156),Cellular Component:membrane (GO:0016020)
CAFS_HM_T_00074457	4	Molecular Function:microtubule motor activity (GO:0003777),Molecular Function:ATP binding (GO:0005524),Biological Process:microtubule-based movement (GO:0007018),Molecular Function:microtubule binding (GO:0008017)
CAFS_HM_T_00068798	3	Molecular Function:porphobilinogen synthase activity (GO:0004655),Biological Process:tetrapyrrole biosynthetic process (GO:0033014),Molecular Function:metal ion binding (GO:0046872)
CAFS_HM_T_00087652	2	Molecular Function:protein binding (GO:0005515),Molecular Function:hydrolase activity (GO:0016787)
CAFS_HM_T_00014122	1	Molecular Function:protein binding (GO:0005515)
CAFS_HM_T_00051022	1	Molecular Function:GTP binding (GO:0005525)
CAFS_HM_T_00089584	3	Molecular Function:protein kinase activity (GO:0004672),Molecular Function:ATP binding (GO:0005524),Biological Process:protein phosphorylation (GO:0006468)
CAFS_HM_T_00076739	3	Molecular Function:iron ion binding (GO:0005506),Molecular Function:heme binding (GO:0020037),Biological Process:oxidation-reduction process (GO:0055114)
CAFS_HM_T_00089312	1	Molecular Function:nucleic acid binding (GO:0003676)
CAFS_HM_T_00057480	--	--
CAFS_HM_T_00084019	1	Molecular Function:protein binding (GO:0005515)
CAFS_HM_T_00026365	--	--
CAFS_HM_T_00017050	2	Biological Process:biosynthetic process (GO:0009058),Molecular Function:pyridoxal phosphate binding (GO:0030170)
CAFS_HM_T_00057454	1	Molecular Function:calcium ion binding (GO:0005509)
CAFS_HM_T_00021094	2	Molecular Function:catalytic activity (GO:0003824),Biological Process:biosynthetic process (GO:0009058)
CAFS_HM_T_00045647	--	--
CAFS_HM_T_00026614	--	--
CAFS_HM_T_00025124	2	Cellular Component:nucleus (GO:0005634),Biological Process:nucleosome assembly (GO:0006334)
CAFS_HM_T_00059969	1	Biological Process:carbohydrate metabolic process (GO:0005975)
CAFS_HM_T_00075342	4	Molecular Function:protein kinase activity (GO:0004672),Molecular Function:protein serine/threonine kinase activity (GO:0004674),Molecular Function:ATP binding (GO:0005524),Biological Process:protein phosphorylation (GO:0006468)
CAFS_HM_T_00021076	2	Molecular Function:ATP binding (GO:0005524),Biological Process:carbohydrate metabolic process (GO:0005975)
CAFS_HM_T_00063546	--	--
CAFS_HM_T_00028073	1	Molecular Function:S-adenosylmethionine-dependent methyltransferase activity (GO:0008757)
CAFS_HM_T_00067660	2	Molecular Function:DNA helicase activity (GO:0003678),Molecular Function:ATP binding (GO:0005524)
CAFS_HM_T_00037508	1	Molecular Function:nucleic acid binding (GO:0003676)
CAFS_HM_T_00040502	3	Molecular Function:adenosylhomocysteinase activity (GO:0004013),Biological Process:S-adenosylhomocysteine catabolic process (GO:0019510),Molecular Function:NAD binding (GO:0051287)
CAFS_HM_T_00063030	2	Molecular Function:actin binding (GO:0003779),Cellular Component:intracellular (GO:0005622)
CAFS_HM_T_00069351	1	Molecular Function:hydrolase activity (GO:0016787)
CAFS_HM_T_00016432	3	Molecular Function:calcium ion binding (GO:0005509),Molecular Function:oxidoreductase activity (GO:0016491),Biological Process:oxidation-reduction process (GO:0055114)
CAFS_HM_T_00059504	2	Molecular Function:metalloendopeptidase activity (GO:0004222),Biological Process:proteolysis (GO:0006508)
CAFS_HM_T_00042401	1	Molecular Function:sulfotransferase activity (GO:0008146)
CAFS_HM_T_00090136	3	Molecular Function:ubiquitin-protein transferase activity (GO:0004842),Biological Process:apoptotic process (GO:0006915),Biological Process:regulation of cytokinesis (GO:0032465)
CAFS_HM_T_00049316	2	Molecular Function:nucleic acid binding (GO:0003676),Molecular Function:ATP binding (GO:0005524)
CAFS_HM_T_00063446	--	--
CAFS_HM_T_00020634	2	Biological Process:proteolysis (GO:0006508),Molecular Function:peptidase activity (GO:0008233)
CAFS_HM_T_00048562	--	--
CAFS_HM_T_00013787	3	Molecular Function:protein kinase activity (GO:0004672),Molecular Function:ATP binding (GO:0005524),Biological Process:protein phosphorylation (GO:0006468)
CAFS_HM_T_00054831	--	--
CAFS_HM_T_00000705	1	Molecular Function:protein binding (GO:0005515)
CAFS_HM_T_00016209	--	--
CAFS_HM_T_00046640	3	Molecular Function:calcium ion binding (GO:0005509),Biological Process:homophilic cell adhesion via plasma membrane adhesion molecules (GO:0007156),Cellular Component:membrane (GO:0016020)
CAFS_HM_T_00091274	--	--
CAFS_HM_T_00086398	--	--
CAFS_HM_T_00013189	3	Molecular Function:motor activity (GO:0003774),Molecular Function:ATP binding (GO:0005524),Cellular Component:myosin complex (GO:0016459)
CAFS_HM_T_00010298	1	Molecular Function:calcium ion binding (GO:0005509)
CAFS_HM_T_00087508	2	Molecular Function:serine-type endopeptidase activity (GO:0004252),Biological Process:proteolysis (GO:0006508)
CAFS_HM_T_00015614	2	Molecular Function:nucleotide binding (GO:0000166),Molecular Function:metal ion binding (GO:0046872)
CAFS_HM_T_00011710	3	Molecular Function:iron ion binding (GO:0005506),Molecular Function:heme binding (GO:0020037),Biological Process:oxidation-reduction process (GO:0055114)
CAFS_HM_T_00001792	--	--
CAFS_HM_T_00014230	--	--
CAFS_HM_T_00059277	--	--
CAFS_HM_T_00015671	2	Molecular Function:DNA binding (GO:0003677),Biological Process:signal transduction (GO:0007165)
CAFS_HM_T_00082931	3	Molecular Function:protein kinase activity (GO:0004672),Molecular Function:ATP binding (GO:0005524),Biological Process:protein phosphorylation (GO:0006468)
CAFS_HM_T_00072640	1	Molecular Function:tRNA binding (GO:0000049)
CAFS_HM_T_00022113	4	Molecular Function:phospholipase A2 activity (GO:0004623),Molecular Function:calcium ion binding (GO:0005509),Cellular Component:extracellular region (GO:0005576),Biological Process:lipid catabolic process (GO:0016042)
CAFS_HM_T_00023390	--	--
CAFS_HM_T_00024878	3	Molecular Function:threonine-type endopeptidase activity (GO:0004298),Cellular Component:proteasome core complex (GO:0005839),Biological Process:proteolysis involved in cellular protein catabolic process (GO:0051603)
CAFS_HM_T_00091103	1	Biological Process:metabolic process (GO:0008152)
CAFS_HM_T_00081886	3	Molecular Function:protein binding (GO:0005515),Molecular Function:metal ion binding (GO:0046872),Biological Process:oxidation-reduction process (GO:0055114)
CAFS_HM_T_00040039	2	Molecular Function:hydrolase activity (GO:0016787),Molecular Function:metal ion binding (GO:0046872)
CAFS_HM_T_00054900	5	Molecular Function:GTPase activity (GO:0003924),Molecular Function:signal transducer activity (GO:0004871),Biological Process:G-protein coupled receptor signaling pathway (GO:0007186),Molecular Function:guanyl nucleotide binding (GO:0019001),Molecular Function:G-protein beta/gamma-subunit complex binding (GO:0031683)
CAFS_HM_T_00004057	--	--
CAFS_HM_T_00071759	--	--
CAFS_HM_T_00013829	5	Biological Process:NADP catabolic process (GO:0006742),Molecular Function:oxidoreductase activity (GO:0016491),Biological Process:pyridine nucleotide biosynthetic process (GO:0019363),Molecular Function:NADP binding (GO:0050661),Biological Process:oxidation-reduction process (GO:0055114)
CAFS_HM_T_00086407	1	Cellular Component:integral component of membrane (GO:0016021)
CAFS_HM_T_00007037	2	Molecular Function:structural molecule activity (GO:0005198),Cellular Component:intermediate filament (GO:0005882)
CAFS_HM_T_00035362	2	Molecular Function:DNA binding (GO:0003677),Molecular Function:DNA-directed 5'-3' RNA polymerase activity (GO:0003899)
CAFS_HM_T_00072952	1	Molecular Function:protein binding (GO:0005515)
CAFS_HM_T_00075936	3	Molecular Function:threonine-type endopeptidase activity (GO:0004298),Cellular Component:proteasome core complex (GO:0005839),Biological Process:proteolysis involved in cellular protein catabolic process (GO:0051603)
CAFS_HM_T_00016679	4	Molecular Function:structural constituent of ribosome (GO:0003735),Cellular Component:intracellular (GO:0005622),Cellular Component:ribosome (GO:0005840),Biological Process:translation (GO:0006412)
CAFS_HM_T_00053319	--	--
CAFS_HM_T_00059764	4	Molecular Function:protein kinase activity (GO:0004672),Molecular Function:protein serine/threonine kinase activity (GO:0004674),Molecular Function:ATP binding (GO:0005524),Biological Process:protein phosphorylation (GO:0006468)
CAFS_HM_T_00019527	--	--
CAFS_HM_T_00035137	2	Molecular Function:catalytic activity (GO:0003824),Biological Process:metabolic process (GO:0008152)
CAFS_HM_T_00064310	1	Molecular Function:protein binding (GO:0005515)
CAFS_HM_T_00028602	--	--
CAFS_HM_T_00026250	3	Molecular Function:protein binding (GO:0005515),Biological Process:regulation of apoptotic process (GO:0042981),Molecular Function:ADP binding (GO:0043531)
CAFS_HM_T_00003225	4	Biological Process:protein peptidyl-prolyl isomerization (GO:0000413),Molecular Function:peptidyl-prolyl cis-trans isomerase activity (GO:0003755),Biological Process:protein folding (GO:0006457),Molecular Function:zinc ion binding (GO:0008270)
CAFS_HM_T_00091218	2	Molecular Function:oxidoreductase activity (GO:0016491),Biological Process:oxidation-reduction process (GO:0055114)
CAFS_HM_T_00089954	5	Molecular Function:endopeptidase activity (GO:0004175),Molecular Function:threonine-type endopeptidase activity (GO:0004298),Cellular Component:proteasome core complex (GO:0005839),Biological Process:ubiquitin-dependent protein catabolic process (GO:0006511),Biological Process:proteolysis involved in cellular protein catabolic process (GO:0051603)
CAFS_HM_T_00044079	1	Cellular Component:proteasome activator complex (GO:0008537)
CAFS_HM_T_00003447	4	Molecular Function:protein kinase activity (GO:0004672),Molecular Function:protein serine/threonine kinase activity (GO:0004674),Molecular Function:ATP binding (GO:0005524),Biological Process:protein phosphorylation (GO:0006468)
CAFS_HM_T_00087328	--	--
CAFS_HM_T_00022599	2	Molecular Function:poly(ADP-ribose) glycohydrolase activity (GO:0004649),Biological Process:carbohydrate metabolic process (GO:0005975)
CAFS_HM_T_00061256	1	Molecular Function:small protein activating enzyme activity (GO:0008641)
CAFS_HM_T_00006180	--	--
CAFS_HM_T_00026966	3	Molecular Function:adenosylhomocysteinase activity (GO:0004013),Biological Process:S-adenosylhomocysteine catabolic process (GO:0019510),Molecular Function:NAD binding (GO:0051287)
CAFS_HM_T_00033433	1	Molecular Function:protein binding (GO:0005515)
CAFS_HM_T_00056681	1	Molecular Function:calcium ion binding (GO:0005509)
CAFS_HM_T_00040827	--	--
CAFS_HM_T_00076920	1	Molecular Function:protein binding (GO:0005515)
CAFS_HM_T_00065317	2	Molecular Function:calcium ion binding (GO:0005509),Molecular Function:calcium-dependent phospholipid binding (GO:0005544)
CAFS_HM_T_00067532	3	Molecular Function:structural constituent of ribosome (GO:0003735),Cellular Component:ribosome (GO:0005840),Biological Process:translation (GO:0006412)
CAFS_HM_T_00081922	1	Molecular Function:calcium ion binding (GO:0005509)
CAFS_HM_T_00004948	--	--
CAFS_HM_T_00061641	1	Molecular Function:fatty-acyl-CoA binding (GO:0000062)
CAFS_HM_T_00088572	2	Molecular Function:cysteine-type endopeptidase activity (GO:0004197),Biological Process:proteolysis (GO:0006508)
CAFS_HM_T_00021142	4	Molecular Function:antioxidant activity (GO:0016209),Molecular Function:oxidoreductase activity (GO:0016491),Molecular Function:peroxiredoxin activity (GO:0051920),Biological Process:oxidation-reduction process (GO:0055114)
CAFS_HM_T_00017218	--	--
CAFS_HM_T_00000557	3	Molecular Function:protein kinase activity (GO:0004672),Molecular Function:ATP binding (GO:0005524),Biological Process:protein phosphorylation (GO:0006468)
CAFS_HM_T_00046881	--	--
CAFS_HM_T_00085296	1	Biological Process:oxidation-reduction process (GO:0055114)
CAFS_HM_T_00001910	--	--
CAFS_HM_T_00031085	2	Biological Process:biosynthetic process (GO:0009058),Molecular Function:transferase activity (GO:0016740)
CAFS_HM_T_00046767	1	Biological Process:nitrogen compound metabolic process (GO:0006807)
CAFS_HM_T_00009324	1	Molecular Function:protein binding (GO:0005515)
CAFS_HM_T_00015330	3	Molecular Function:3-beta-hydroxy-delta5-steroid dehydrogenase activity (GO:0003854),Biological Process:steroid biosynthetic process (GO:0006694),Biological Process:oxidation-reduction process (GO:0055114)
CAFS_HM_T_00005478	1	Molecular Function:protein binding (GO:0005515)
CAFS_HM_T_00037146	1	Molecular Function:nucleic acid binding (GO:0003676)
CAFS_HM_T_00000654	5	Molecular Function:nucleoside diphosphate kinase activity (GO:0004550),Biological Process:nucleoside diphosphate phosphorylation (GO:0006165),Biological Process:GTP biosynthetic process (GO:0006183),Biological Process:UTP biosynthetic process (GO:0006228),Biological Process:CTP biosynthetic process (GO:0006241)
CAFS_HM_T_00011605	--	--
CAFS_HM_T_00038366	--	--
CAFS_HM_T_00034302	--	--
CAFS_HM_T_00078440	4	Cellular Component:Arp2/3 protein complex (GO:0005885),Cellular Component:actin cytoskeleton (GO:0015629),Biological Process:regulation of actin filament polymerization (GO:0030833),Biological Process:Arp2/3 complex-mediated actin nucleation (GO:0034314)
CAFS_HM_T_00003816	2	Molecular Function:methionine adenosyltransferase activity (GO:0004478),Biological Process:S-adenosylmethionine biosynthetic process (GO:0006556)
CAFS_HM_T_00068464	--	--
CAFS_HM_T_00057859	2	Molecular Function:ARF guanyl-nucleotide exchange factor activity (GO:0005086),Biological Process:regulation of ARF protein signal transduction (GO:0032012)
CAFS_HM_T_00071730	4	Molecular Function:structural constituent of ribosome (GO:0003735),Cellular Component:ribosome (GO:0005840),Biological Process:translation (GO:0006412),Molecular Function:rRNA binding (GO:0019843)
CAFS_HM_T_00019446	1	Molecular Function:GTP binding (GO:0005525)
CAFS_HM_T_00054509	1	Molecular Function:protein binding (GO:0005515)
CAFS_HM_T_00032486	5	Molecular Function:protein kinase activity (GO:0004672),Molecular Function:protein serine/threonine kinase activity (GO:0004674),Molecular Function:ATP binding (GO:0005524),Biological Process:protein phosphorylation (GO:0006468),Biological Process:intracellular signal transduction (GO:0035556)
CAFS_HM_T_00036396	--	--
CAFS_HM_T_00009342	1	Molecular Function:GTPase activator activity (GO:0005096)
CAFS_HM_T_00046939	1	Molecular Function:nucleic acid binding (GO:0003676)
CAFS_HM_T_00031817	4	Molecular Function:structural constituent of ribosome (GO:0003735),Cellular Component:intracellular (GO:0005622),Cellular Component:ribosome (GO:0005840),Biological Process:translation (GO:0006412)
CAFS_HM_T_00063949	3	Cellular Component:cytoplasm (GO:0005737),Biological Process:iron-sulfur cluster assembly (GO:0016226),Molecular Function:iron-sulfur cluster binding (GO:0051536)
CAFS_HM_T_00031119	--	--
CAFS_HM_T_00085852	--	--
CAFS_HM_T_00051033	--	--
CAFS_HM_T_00002401	3	Molecular Function:GTPase activator activity (GO:0005096),Molecular Function:protein binding (GO:0005515),Biological Process:signal transduction (GO:0007165)
CAFS_HM_T_00033843	--	--
CAFS_HM_T_00051688	--	--
CAFS_HM_T_00067454	--	--
CAFS_HM_T_00041607	--	--
CAFS_HM_T_00058826	2	Molecular Function:nucleic acid binding (GO:0003676),Molecular Function:ATP binding (GO:0005524)
CAFS_HM_T_00038520	1	Molecular Function:GTP binding (GO:0005525)
CAFS_HM_T_00016811	--	--
CAFS_HM_T_00088070	--	--
CAFS_HM_T_00026281	2	Molecular Function:catalytic activity (GO:0003824),Biological Process:metabolic process (GO:0008152)
CAFS_HM_T_00076758	3	Molecular Function:calcium ion binding (GO:0005509),Biological Process:homophilic cell adhesion via plasma membrane adhesion molecules (GO:0007156),Cellular Component:membrane (GO:0016020)
CAFS_HM_T_00067055	--	--
CAFS_HM_T_00063174	5	Molecular Function:metalloendopeptidase activity (GO:0004222),Molecular Function:ATP binding (GO:0005524),Biological Process:proteolysis (GO:0006508),Molecular Function:zinc ion binding (GO:0008270),Cellular Component:integral component of membrane (GO:0016021)
CAFS_HM_T_00039199	3	Biological Process:protein peptidyl-prolyl isomerization (GO:0000413),Molecular Function:peptidyl-prolyl cis-trans isomerase activity (GO:0003755),Biological Process:protein folding (GO:0006457)
CAFS_HM_T_00029151	1	Molecular Function:GTP binding (GO:0005525)
CAFS_HM_T_00091897	--	--
CAFS_HM_T_00030553	--	--
CAFS_HM_T_00013220	--	--
CAFS_HM_T_00034294	3	Molecular Function:calcium ion binding (GO:0005509),Biological Process:homophilic cell adhesion via plasma membrane adhesion molecules (GO:0007156),Cellular Component:membrane (GO:0016020)
CAFS_HM_T_00051016	2	Molecular Function:catalytic activity (GO:0003824),Biological Process:metabolic process (GO:0008152)
CAFS_HM_T_00031038	--	--
CAFS_HM_T_00077847	1	Molecular Function:nucleic acid binding (GO:0003676)
CAFS_HM_T_00008662	1	Molecular Function:protein binding (GO:0005515)
CAFS_HM_T_00079937	4	Molecular Function:protein kinase activity (GO:0004672),Molecular Function:protein binding (GO:0005515),Molecular Function:ATP binding (GO:0005524),Biological Process:protein phosphorylation (GO:0006468)
CAFS_HM_T_00027267	1	Molecular Function:protein binding (GO:0005515)
CAFS_HM_T_00020661	--	--
CAFS_HM_T_00063662	--	--
CAFS_HM_T_00049915	--	--
CAFS_HM_T_00090680	1	Molecular Function:FAD binding (GO:0071949)
CAFS_HM_T_00041049	--	--
CAFS_HM_T_00088288	3	Molecular Function:endopeptidase inhibitor activity (GO:0004866),Cellular Component:extracellular region (GO:0005576),Cellular Component:extracellular space (GO:0005615)
CAFS_HM_T_00017102	--	--
CAFS_HM_T_00090826	--	--
CAFS_HM_T_00007207	2	Molecular Function:protein binding (GO:0005515),Molecular Function:metal ion binding (GO:0046872)
CAFS_HM_T_00056776	--	--
CAFS_HM_T_00090579	--	--
CAFS_HM_T_00038937	2	Molecular Function:catalytic activity (GO:0003824),Biological Process:oxidation-reduction process (GO:0055114)
CAFS_HM_T_00037274	1	Molecular Function:protein binding (GO:0005515)
CAFS_HM_T_00072546	--	--
CAFS_HM_T_00014913	3	Molecular Function:magnesium ion binding (GO:0000287),Molecular Function:ribose phosphate diphosphokinase activity (GO:0004749),Biological Process:nucleotide biosynthetic process (GO:0009165)
CAFS_HM_T_00045601	3	Molecular Function:calcium ion binding (GO:0005509),Cellular Component:extracellular region (GO:0005576),Biological Process:cell-matrix adhesion (GO:0007160)
CAFS_HM_T_00090865	3	Molecular Function:nucleic acid binding (GO:0003676),Molecular Function:RNA binding (GO:0003723),Molecular Function:translation initiation factor activity (GO:0003743)
CAFS_HM_T_00039521	3	Molecular Function:RNA binding (GO:0003723),Molecular Function:phenylalanine-tRNA ligase activity (GO:0004826),Molecular Function:protein binding (GO:0005515)
CAFS_HM_T_00034512	1	Biological Process:phosphatidylinositol phosphorylation (GO:0046854)
CAFS_HM_T_00034442	2	Molecular Function:catalytic activity (GO:0003824),Biological Process:metabolic process (GO:0008152)
CAFS_HM_T_00041380	3	Molecular Function:iron ion binding (GO:0005506),Molecular Function:heme binding (GO:0020037),Biological Process:oxidation-reduction process (GO:0055114)
CAFS_HM_T_00085036	4	Cellular Component:extracellular region (GO:0005576),Biological Process:lipid transport (GO:0006869),Molecular Function:lipid binding (GO:0008289),Biological Process:lipoprotein metabolic process (GO:0042157)
CAFS_HM_T_00078717	3	Molecular Function:iron ion binding (GO:0005506),Molecular Function:heme binding (GO:0020037),Biological Process:oxidation-reduction process (GO:0055114)
CAFS_HM_T_00061527	--	--
CAFS_HM_T_00019214	--	--
CAFS_HM_T_00024483	1	Molecular Function:protein binding (GO:0005515)
CAFS_HM_T_00086665	1	Molecular Function:protein binding (GO:0005515)
CAFS_HM_T_00088066	--	--
CAFS_HM_T_00005119	3	Molecular Function:thiol-dependent ubiquitin-specific protease activity (GO:0004843),Cellular Component:intracellular (GO:0005622),Biological Process:ubiquitin-dependent protein catabolic process (GO:0006511)
CAFS_HM_T_00058953	--	--
CAFS_HM_T_00086895	--	--
CAFS_HM_T_00064934	1	Molecular Function:phosphatase activator activity (GO:0019211)
CAFS_HM_T_00035439	4	Biological Process:ion transport (GO:0006811),Molecular Function:ion transmembrane transporter activity (GO:0015075),Cellular Component:membrane (GO:0016020),Biological Process:transmembrane transport (GO:0055085)
CAFS_HM_T_00058956	2	Molecular Function:catalytic activity (GO:0003824),Biological Process:metabolic process (GO:0008152)
CAFS_HM_T_00059585	--	--
CAFS_HM_T_00087477	5	Molecular Function:protein binding (GO:0005515),Cellular Component:nucleus (GO:0005634),Cellular Component:cytoplasm (GO:0005737),Biological Process:protein import into nucleus (GO:0006606),Molecular Function:protein transporter activity (GO:0008565)
CAFS_HM_T_00047031	--	--
CAFS_HM_T_00086186	--	--
CAFS_HM_T_00090804	2	Molecular Function:protein binding (GO:0005515),Molecular Function:phosphatidylinositol binding (GO:0035091)
CAFS_HM_T_00057622	1	Molecular Function:nucleic acid binding (GO:0003676)
CAFS_HM_T_00076753	--	--
CAFS_HM_T_00070185	2	Molecular Function:acyl-CoA dehydrogenase activity (GO:0003995),Biological Process:oxidation-reduction process (GO:0055114)
CAFS_HM_T_00020870	--	--
CAFS_HM_T_00035874	1	Molecular Function:GTP binding (GO:0005525)
CAFS_HM_T_00045723	--	--
CAFS_HM_T_00071736	--	--
CAFS_HM_T_00022683	1	Molecular Function:hydrolase activity (GO:0016787)
CAFS_HM_T_00018827	1	Molecular Function:protein binding (GO:0005515)
CAFS_HM_T_00072477	4	Molecular Function:structural constituent of ribosome (GO:0003735),Cellular Component:intracellular (GO:0005622),Cellular Component:ribosome (GO:0005840),Biological Process:translation (GO:0006412)
CAFS_HM_T_00007349	2	Molecular Function:protein kinase activity (GO:0004672),Biological Process:protein phosphorylation (GO:0006468)
CAFS_HM_T_00048672	2	Biological Process:biosynthetic process (GO:0009058),Molecular Function:pyridoxal phosphate binding (GO:0030170)
CAFS_HM_T_00062600	--	--
CAFS_HM_T_00001305	1	Biological Process:cellular metabolic process (GO:0044237)
CAFS_HM_T_00071841	--	--
CAFS_HM_T_00037372	2	Molecular Function:GTPase activity (GO:0003924),Molecular Function:GTP binding (GO:0005525)
CAFS_HM_T_00068852	1	Molecular Function:RNA binding (GO:0003723)
CAFS_HM_T_00032332	6	Molecular Function:catalytic activity (GO:0003824),Molecular Function:formate-tetrahydrofolate ligase activity (GO:0004329),Molecular Function:methylenetetrahydrofolate dehydrogenase (NADP+) activity (GO:0004488),Molecular Function:ATP binding (GO:0005524),Biological Process:folic acid-containing compound biosynthetic process (GO:0009396),Biological Process:oxidation-reduction process (GO:0055114)
CAFS_HM_T_00004443	2	Molecular Function:GTP binding (GO:0005525),Biological Process:small GTPase mediated signal transduction (GO:0007264)
CAFS_HM_T_00003351	2	Molecular Function:protein tyrosine phosphatase activity (GO:0004725),Biological Process:protein dephosphorylation (GO:0006470)
CAFS_HM_T_00015205	2	Molecular Function:serine-type carboxypeptidase activity (GO:0004185),Biological Process:proteolysis (GO:0006508)
CAFS_HM_T_00024367	1	Molecular Function:protein binding (GO:0005515)
CAFS_HM_T_00013096	1	Molecular Function:GTP binding (GO:0005525)
CAFS_HM_T_00017913	1	Molecular Function:protein binding (GO:0005515)
CAFS_HM_T_00008548	2	Molecular Function:GTP binding (GO:0005525),Biological Process:small GTPase mediated signal transduction (GO:0007264)
CAFS_HM_T_00021306	2	Molecular Function:GTPase activity (GO:0003924),Molecular Function:GTP binding (GO:0005525)
CAFS_HM_T_00082867	2	Molecular Function:GTP binding (GO:0005525),Biological Process:small GTPase mediated signal transduction (GO:0007264)
CAFS_HM_T_00013087	1	Molecular Function:protein binding (GO:0005515)
CAFS_HM_T_00017900	--	--
CAFS_HM_T_00022800	--	--
CAFS_HM_T_00058389	1	Molecular Function:GTP binding (GO:0005525)
CAFS_HM_T_00091439	--	--
CAFS_HM_T_00068695	--	--
CAFS_HM_T_00074538	3	Molecular Function:oxidoreductase activity (GO:0016491),Molecular Function:metal ion binding (GO:0046872),Biological Process:oxidation-reduction process (GO:0055114)
CAFS_HM_T_00039079	1	Molecular Function:protein binding (GO:0005515)
CAFS_HM_T_00014640	1	Molecular Function:protein binding (GO:0005515)
CAFS_HM_T_00047035	2	Molecular Function:NADH dehydrogenase (ubiquinone) activity (GO:0008137),Biological Process:oxidation-reduction process (GO:0055114)
CAFS_HM_T_00088538	--	--
CAFS_HM_T_00032817	1	Molecular Function:GTP binding (GO:0005525)
CAFS_HM_T_00029821	1	Molecular Function:zinc ion binding (GO:0008270)
CAFS_HM_T_00080203	1	Molecular Function:GTPase activator activity (GO:0005096)
CAFS_HM_T_00020287	--	--
CAFS_HM_T_00057816	--	--
CAFS_HM_T_00042247	--	--
CAFS_HM_T_00035435	1	Molecular Function:hydrolase activity (GO:0016787)
CAFS_HM_T_00053649	--	--
CAFS_HM_T_00015695	--	--
CAFS_HM_T_00076451	2	Molecular Function:translation elongation factor activity (GO:0003746),Biological Process:translational elongation (GO:0006414)
CAFS_HM_T_00003605	--	--
CAFS_HM_T_00003706	2	Molecular Function:catalytic activity (GO:0003824),Biological Process:metabolic process (GO:0008152)
CAFS_HM_T_00070546	--	--
CAFS_HM_T_00054949	--	--
CAFS_HM_T_00033384	1	Molecular Function:protein binding (GO:0005515)
CAFS_HM_T_00015176	3	Molecular Function:carboxy-lyase activity (GO:0016831),Biological Process:carboxylic acid metabolic process (GO:0019752),Molecular Function:pyridoxal phosphate binding (GO:0030170)
CAFS_HM_T_00054614	--	--
CAFS_HM_T_00043065	1	Molecular Function:O-methyltransferase activity (GO:0008171)
CAFS_HM_T_00074014	1	Molecular Function:nucleic acid binding (GO:0003676)
CAFS_HM_T_00085760	--	--
CAFS_HM_T_00049725	3	Molecular Function:scavenger receptor activity (GO:0005044),Biological Process:immune response (GO:0006955),Molecular Function:polysaccharide binding (GO:0030247)
CAFS_HM_T_00019174	--	--
CAFS_HM_T_00028611	--	--
CAFS_HM_T_00084097	--	--
CAFS_HM_T_00037007	1	Molecular Function:protein binding (GO:0005515)
CAFS_HM_T_00064372	--	--
CAFS_HM_T_00003972	2	Molecular Function:calcium ion binding (GO:0005509),Molecular Function:calcium-dependent phospholipid binding (GO:0005544)
CAFS_HM_T_00059915	--	--
CAFS_HM_T_00048987	1	Biological Process:nucleoside metabolic process (GO:0009116)
CAFS_HM_T_00079390	2	Molecular Function:nucleic acid binding (GO:0003676),Molecular Function:ATP binding (GO:0005524)
CAFS_HM_T_00019817	1	Molecular Function:protein binding (GO:0005515)
CAFS_HM_T_00065611	5	Molecular Function:protein kinase activity (GO:0004672),Molecular Function:calmodulin-dependent protein kinase activity (GO:0004683),Molecular Function:calmodulin binding (GO:0005516),Molecular Function:ATP binding (GO:0005524),Biological Process:protein phosphorylation (GO:0006468)
CAFS_HM_T_00000978	--	--
CAFS_HM_T_00010635	--	--
CAFS_HM_T_00029076	1	Molecular Function:protein binding (GO:0005515)
CAFS_HM_T_00001845	--	--
CAFS_HM_T_00074546	2	Molecular Function:GTPase activity (GO:0003924),Molecular Function:GTP binding (GO:0005525)
CAFS_HM_T_00075602	1	Biological Process:ATP hydrolysis coupled proton transport (GO:0015991)
CAFS_HM_T_00069480	--	--
CAFS_HM_T_00090795	4	Molecular Function:cysteine-type endopeptidase activity (GO:0004197),Biological Process:proteolysis (GO:0006508),Molecular Function:cysteine-type peptidase activity (GO:0008234),Biological Process:regulation of catalytic activity (GO:0050790)
CAFS_HM_T_00040868	2	Biological Process:proteolysis (GO:0006508),Molecular Function:serine-type peptidase activity (GO:0008236)
CAFS_HM_T_00046350	--	--
CAFS_HM_T_00005053	2	Molecular Function:serine-type endopeptidase activity (GO:0004252),Biological Process:proteolysis (GO:0006508)
CAFS_HM_T_00045389	--	--
CAFS_HM_T_00092126	4	Molecular Function:catalytic activity (GO:0003824),Biological Process:Mo-molybdopterin cofactor biosynthetic process (GO:0006777),Cellular Component:molybdopterin synthase complex (GO:0019008),Molecular Function:iron-sulfur cluster binding (GO:0051536)
CAFS_HM_T_00010672	--	--
CAFS_HM_T_00041987	1	Biological Process:carbohydrate metabolic process (GO:0005975)
CAFS_HM_T_00043831	5	Molecular Function:GTPase activity (GO:0003924),Molecular Function:signal transducer activity (GO:0004871),Biological Process:G-protein coupled receptor signaling pathway (GO:0007186),Molecular Function:guanyl nucleotide binding (GO:0019001),Molecular Function:G-protein beta/gamma-subunit complex binding (GO:0031683)
CAFS_HM_T_00030696	3	Molecular Function:phosphogluconate dehydrogenase (decarboxylating) activity (GO:0004616),Molecular Function:NAD binding (GO:0051287),Biological Process:oxidation-reduction process (GO:0055114)
CAFS_HM_T_00045121	--	--
CAFS_HM_T_00091427	--	--
CAFS_HM_T_00035168	1	Molecular Function:catalytic activity (GO:0003824)
CAFS_HM_T_00031399	2	Molecular Function:serine-type endopeptidase activity (GO:0004252),Biological Process:proteolysis (GO:0006508)
CAFS_HM_T_00067649	1	Molecular Function:zinc ion binding (GO:0008270)
CAFS_HM_T_00068577	1	Molecular Function:protein binding (GO:0005515)
CAFS_HM_T_00002927	2	Molecular Function:RNA binding (GO:0003723),Biological Process:RNA processing (GO:0006396)
CAFS_HM_T_00007670	--	--
CAFS_HM_T_00026039	1	Biological Process:ATP synthesis coupled proton transport (GO:0015986)
CAFS_HM_T_00059280	--	--
CAFS_HM_T_00046569	1	Molecular Function:DNA binding (GO:0003677)
CAFS_HM_T_00015421	2	Biological Process:cellular iron ion homeostasis (GO:0006879),Molecular Function:ferric iron binding (GO:0008199)
CAFS_HM_T_00047131	--	--
CAFS_HM_T_00070408	1	Biological Process:lipid metabolic process (GO:0006629)
CAFS_HM_T_00041710	5	Molecular Function:protein kinase activity (GO:0004672),Molecular Function:calmodulin-dependent protein kinase activity (GO:0004683),Molecular Function:calmodulin binding (GO:0005516),Molecular Function:ATP binding (GO:0005524),Biological Process:protein phosphorylation (GO:0006468)
CAFS_HM_T_00018700	1	Molecular Function:calcium ion binding (GO:0005509)
CAFS_HM_T_00052679	2	Molecular Function:ferrochelatase activity (GO:0004325),Biological Process:heme biosynthetic process (GO:0006783)
CAFS_HM_T_00022906	5	Molecular Function:protein kinase activity (GO:0004672),Molecular Function:calmodulin-dependent protein kinase activity (GO:0004683),Molecular Function:calmodulin binding (GO:0005516),Molecular Function:ATP binding (GO:0005524),Biological Process:protein phosphorylation (GO:0006468)
CAFS_HM_T_00032493	5	Molecular Function:endopeptidase activity (GO:0004175),Molecular Function:threonine-type endopeptidase activity (GO:0004298),Cellular Component:proteasome core complex (GO:0005839),Biological Process:ubiquitin-dependent protein catabolic process (GO:0006511),Biological Process:proteolysis involved in cellular protein catabolic process (GO:0051603)
CAFS_HM_T_00024547	--	--
CAFS_HM_T_00039641	2	Cellular Component:integral component of membrane (GO:0016021),Biological Process:vesicle-mediated transport (GO:0016192)
CAFS_HM_T_00065545	1	Molecular Function:nucleic acid binding (GO:0003676)
CAFS_HM_T_00056166	3	Molecular Function:carboxy-lyase activity (GO:0016831),Biological Process:carboxylic acid metabolic process (GO:0019752),Molecular Function:pyridoxal phosphate binding (GO:0030170)
CAFS_HM_T_00089694	3	Molecular Function:protein disulfide isomerase activity (GO:0003756),Cellular Component:endoplasmic reticulum (GO:0005783),Biological Process:oxidation-reduction process (GO:0055114)
CAFS_HM_T_00013525	--	--
CAFS_HM_T_00077881	2	Biological Process:biosynthetic process (GO:0009058),Molecular Function:nucleotidyltransferase activity (GO:0016779)
CAFS_HM_T_00021849	4	Molecular Function:3'-5'-exoribonuclease activity (GO:0000175),Molecular Function:nucleic acid binding (GO:0003676),Molecular Function:RNA binding (GO:0003723),Biological Process:RNA processing (GO:0006396)
CAFS_HM_T_00027527	1	Molecular Function:methyltransferase activity (GO:0008168)
CAFS_HM_T_00053043	--	--
CAFS_HM_T_00063402	--	--
CAFS_HM_T_00070354	3	Molecular Function:Rho guanyl-nucleotide exchange factor activity (GO:0005089),Molecular Function:protein binding (GO:0005515),Biological Process:regulation of Rho protein signal transduction (GO:0035023)
CAFS_HM_T_00066232	1	Cellular Component:membrane (GO:0016020)
CAFS_HM_T_00063775	1	Cellular Component:outer membrane (GO:0019867)
CAFS_HM_T_00006344	--	--
CAFS_HM_T_00077702	--	--
CAFS_HM_T_00004455	2	Molecular Function:protein binding (GO:0005515),Molecular Function:GTP binding (GO:0005525)
CAFS_HM_T_00032885	2	Molecular Function:translation elongation factor activity (GO:0003746),Biological Process:translational elongation (GO:0006414)
CAFS_HM_T_00034255	3	Molecular Function:translation initiation factor activity (GO:0003743),Molecular Function:protein binding (GO:0005515),Biological Process:translational initiation (GO:0006413)
CAFS_HM_T_00003170	5	Molecular Function:protein kinase activity (GO:0004672),Molecular Function:calmodulin-dependent protein kinase activity (GO:0004683),Molecular Function:calmodulin binding (GO:0005516),Molecular Function:ATP binding (GO:0005524),Biological Process:protein phosphorylation (GO:0006468)
CAFS_HM_T_00026415	--	--
CAFS_HM_T_00061958	2	Molecular Function:oxidoreductase activity (GO:0016491),Biological Process:oxidation-reduction process (GO:0055114)
CAFS_HM_T_00034161	1	Biological Process:signal transduction (GO:0007165)
CAFS_HM_T_00013451	1	Molecular Function:calcium ion binding (GO:0005509)
CAFS_HM_T_00024495	3	Molecular Function:nucleotide binding (GO:0000166),Molecular Function:calcium-transporting ATPase activity (GO:0005388),Molecular Function:metal ion binding (GO:0046872)
CAFS_HM_T_00020445	2	Molecular Function:oxidoreductase activity (GO:0016491),Biological Process:oxidation-reduction process (GO:0055114)
CAFS_HM_T_00032224	3	Molecular Function:iron ion binding (GO:0005506),Molecular Function:heme binding (GO:0020037),Biological Process:oxidation-reduction process (GO:0055114)
CAFS_HM_T_00005244	2	Molecular Function:catalytic activity (GO:0003824),Biological Process:biosynthetic process (GO:0009058)
CAFS_HM_T_00039904	3	Cellular Component:endoplasmic reticulum (GO:0005783),Biological Process:intracellular protein transport (GO:0006886),Cellular Component:integral component of membrane (GO:0016021)
CAFS_HM_T_00010878	--	--
CAFS_HM_T_00021569	--	--
CAFS_HM_T_00074258	2	Biological Process:ubiquitin-dependent protein catabolic process (GO:0006511),Molecular Function:ubiquitin protein ligase binding (GO:0031625)
CAFS_HM_T_00085383	--	--
CAFS_HM_T_00015036	1	Molecular Function:actin filament binding (GO:0051015)
CAFS_HM_T_00046982	4	Molecular Function:adenyl-nucleotide exchange factor activity (GO:0000774),Biological Process:protein folding (GO:0006457),Molecular Function:protein homodimerization activity (GO:0042803),Molecular Function:chaperone binding (GO:0051087)
CAFS_HM_T_00036296	2	Molecular Function:DNA binding (GO:0003677),Molecular Function:DNA-directed 5'-3' RNA polymerase activity (GO:0003899)
CAFS_HM_T_00047133	2	Molecular Function:serine-type endopeptidase activity (GO:0004252),Biological Process:proteolysis (GO:0006508)
CAFS_HM_T_00088581	1	Molecular Function:protein binding (GO:0005515)
CAFS_HM_T_00083596	2	Molecular Function:nucleic acid binding (GO:0003676),Molecular Function:protein binding (GO:0005515)
CAFS_HM_T_00054826	2	Molecular Function:serine-type endopeptidase inhibitor activity (GO:0004867),Biological Process:hyaluronan metabolic process (GO:0030212)
CAFS_HM_T_00064294	2	Molecular Function:catalytic activity (GO:0003824),Biological Process:carbohydrate metabolic process (GO:0005975)
CAFS_HM_T_00007105	2	Molecular Function:gamma-glutamyl carboxylase activity (GO:0008488),Biological Process:peptidyl-glutamic acid carboxylation (GO:0017187)
CAFS_HM_T_00028762	2	Molecular Function:nucleic acid binding (GO:0003676),Molecular Function:protein binding (GO:0005515)
CAFS_HM_T_00061847	--	--
CAFS_HM_T_00011832	--	--
CAFS_HM_T_00090088	1	Molecular Function:catalytic activity (GO:0003824)
CAFS_HM_T_00006023	1	Molecular Function:protein binding (GO:0005515)
CAFS_HM_T_00047043	--	--
CAFS_HM_T_00052004	3	Molecular Function:structural constituent of ribosome (GO:0003735),Cellular Component:ribosome (GO:0005840),Biological Process:translation (GO:0006412)
CAFS_HM_T_00027220	1	Molecular Function:GTP binding (GO:0005525)
CAFS_HM_T_00069122	--	--
CAFS_HM_T_00065346	1	Biological Process:lipid metabolic process (GO:0006629)
CAFS_HM_T_00029106	--	--
CAFS_HM_T_00052384	3	Biological Process:intracellular protein transport (GO:0006886),Biological Process:vesicle-mediated transport (GO:0016192),Cellular Component:membrane coat (GO:0030117)
CAFS_HM_T_00084565	--	--
CAFS_HM_T_00068113	1	Molecular Function:nucleic acid binding (GO:0003676)
CAFS_HM_T_00085056	4	Molecular Function:RNA binding (GO:0003723),Molecular Function:double-stranded RNA adenosine deaminase activity (GO:0003726),Molecular Function:adenosine deaminase activity (GO:0004000),Biological Process:RNA processing (GO:0006396)
CAFS_HM_T_00004139	2	Biological Process:intracellular protein transport (GO:0006886),Molecular Function:Ran GTPase binding (GO:0008536)
CAFS_HM_T_00037413	3	Molecular Function:iron ion binding (GO:0005506),Molecular Function:heme binding (GO:0020037),Biological Process:oxidation-reduction process (GO:0055114)
CAFS_HM_T_00078168	1	Molecular Function:protein binding (GO:0005515)
CAFS_HM_T_00036812	1	Molecular Function:nucleic acid binding (GO:0003676)
CAFS_HM_T_00014234	--	--
CAFS_HM_T_00021060	1	Molecular Function:hydrolase activity (GO:0016787)
CAFS_HM_T_00056409	--	--
CAFS_HM_T_00080530	1	Molecular Function:phosphatidylinositol binding (GO:0035091)
CAFS_HM_T_00042308	--	--
CAFS_HM_T_00067206	2	Molecular Function:DNA binding (GO:0003677),Molecular Function:DNA-directed DNA polymerase activity (GO:0003887)
CAFS_HM_T_00069463	1	Cellular Component:mitochondrial matrix (GO:0005759)
CAFS_HM_T_00045231	1	Molecular Function:calcium ion binding (GO:0005509)
CAFS_HM_T_00030657	2	Molecular Function:nucleic acid binding (GO:0003676),Molecular Function:RNA binding (GO:0003723)
CAFS_HM_T_00051403	1	Molecular Function:protein binding (GO:0005515)
CAFS_HM_T_00038958	--	--
CAFS_HM_T_00046992	1	Molecular Function:acid phosphatase activity (GO:0003993)
CAFS_HM_T_00039938	1	Molecular Function:O-methyltransferase activity (GO:0008171)
CAFS_HM_T_00042432	2	Molecular Function:DNA binding (GO:0003677),Biological Process:signal transduction (GO:0007165)
CAFS_HM_T_00065718	--	--
CAFS_HM_T_00081547	3	Molecular Function:protein binding (GO:0005515),Molecular Function:zinc ion binding (GO:0008270),Biological Process:intracellular transport (GO:0046907)
CAFS_HM_T_00025402	--	--
CAFS_HM_T_00082878	2	Molecular Function:protein tyrosine phosphatase activity (GO:0004725),Biological Process:protein dephosphorylation (GO:0006470)
CAFS_HM_T_00078295	--	--
CAFS_HM_T_00073880	4	Molecular Function:damaged DNA binding (GO:0003684),Molecular Function:protein binding (GO:0005515),Biological Process:nucleotide-excision repair (GO:0006289),Biological Process:proteasome-mediated ubiquitin-dependent protein catabolic process (GO:0043161)
CAFS_HM_T_00024484	1	Molecular Function:protein binding (GO:0005515)
CAFS_HM_T_00005587	1	Molecular Function:nucleic acid binding (GO:0003676)
CAFS_HM_T_00049569	--	--
CAFS_HM_T_00065541	2	Biological Process:cristae formation (GO:0042407),Cellular Component:MICOS complex (GO:0061617)
CAFS_HM_T_00009717	4	Molecular Function:protein binding (GO:0005515),Cellular Component:intracellular (GO:0005622),Molecular Function:zinc ion binding (GO:0008270),Molecular Function:metal ion binding (GO:0046872)
CAFS_HM_T_00011027	2	Molecular Function:cytochrome-c oxidase activity (GO:0004129),Cellular Component:mitochondrial inner membrane (GO:0005743)
CAFS_HM_T_00070854	--	--
CAFS_HM_T_00040325	2	Biological Process:metabolic process (GO:0008152),Molecular Function:CoA-transferase activity (GO:0008410)
CAFS_HM_T_00018545	--	--
CAFS_HM_T_00059636	--	--
CAFS_HM_T_00027779	1	Molecular Function:nucleic acid binding (GO:0003676)
CAFS_HM_T_00018111	2	Biological Process:protein deubiquitination (GO:0016579),Molecular Function:thiol-dependent ubiquitinyl hydrolase activity (GO:0036459)
CAFS_HM_T_00018176	3	Molecular Function:heme oxygenase (decyclizing) activity (GO:0004392),Biological Process:heme oxidation (GO:0006788),Biological Process:oxidation-reduction process (GO:0055114)
CAFS_HM_T_00030513	1	Molecular Function:nucleic acid binding (GO:0003676)
CAFS_HM_T_00053924	--	--
CAFS_HM_T_00047854	2	Biological Process:cellular iron ion homeostasis (GO:0006879),Molecular Function:ferric iron binding (GO:0008199)
CAFS_HM_T_00067223	3	Molecular Function:protein kinase activity (GO:0004672),Molecular Function:ATP binding (GO:0005524),Biological Process:protein phosphorylation (GO:0006468)
CAFS_HM_T_00053536	4	Cellular Component:extracellular region (GO:0005576),Biological Process:carbohydrate metabolic process (GO:0005975),Biological Process:chitin metabolic process (GO:0006030),Molecular Function:chitin binding (GO:0008061)
CAFS_HM_T_00082980	1	Biological Process:cell redox homeostasis (GO:0045454)
CAFS_HM_T_00042865	--	--
CAFS_HM_T_00033881	1	Molecular Function:kinase activity (GO:0016301)
CAFS_HM_T_00078356	2	Molecular Function:6-phosphofructokinase activity (GO:0003872),Biological Process:glycolytic process (GO:0006096)
CAFS_HM_T_00019209	--	--
CAFS_HM_T_00016866	--	--
CAFS_HM_T_00027144	--	--
CAFS_HM_T_00082066	1	Biological Process:mRNA processing (GO:0006397)
CAFS_HM_T_00059556	1	Biological Process:metabolic process (GO:0008152)
CAFS_HM_T_00076939	2	Molecular Function:GTP binding (GO:0005525),Biological Process:small GTPase mediated signal transduction (GO:0007264)
CAFS_HM_T_00076942	3	Molecular Function:metalloendopeptidase activity (GO:0004222),Molecular Function:ATP binding (GO:0005524),Biological Process:proteolysis (GO:0006508)
CAFS_HM_T_00053960	1	Molecular Function:nucleic acid binding (GO:0003676)
CAFS_HM_T_00082416	2	Molecular Function:catalytic activity (GO:0003824),Biological Process:metabolic process (GO:0008152)
CAFS_HM_T_00030710	1	Molecular Function:protein binding (GO:0005515)
CAFS_HM_T_00085578	--	--
CAFS_HM_T_00030286	2	Molecular Function:triose-phosphate isomerase activity (GO:0004807),Biological Process:metabolic process (GO:0008152)
CAFS_HM_T_00079159	2	Cellular Component:cytoplasm (GO:0005737),Biological Process:protein folding (GO:0006457)
CAFS_HM_T_00052588	1	Molecular Function:nucleic acid binding (GO:0003676)
CAFS_HM_T_00033155	2	Molecular Function:protein binding (GO:0005515),Biological Process:signal transduction (GO:0007165)
CAFS_HM_T_00067316	3	Molecular Function:protein kinase activity (GO:0004672),Molecular Function:ATP binding (GO:0005524),Biological Process:protein phosphorylation (GO:0006468)
CAFS_HM_T_00092416	1	Biological Process:oxidation-reduction process (GO:0055114)
CAFS_HM_T_00014693	1	Biological Process:carbohydrate metabolic process (GO:0005975)
CAFS_HM_T_00013122	1	Molecular Function:glycylpeptide N-tetradecanoyltransferase activity (GO:0004379)
CAFS_HM_T_00081278	2	Molecular Function:nucleic acid binding (GO:0003676),Molecular Function:RNA binding (GO:0003723)
CAFS_HM_T_00090069	2	Molecular Function:nucleic acid binding (GO:0003676),Molecular Function:RNA binding (GO:0003723)
CAFS_HM_T_00028539	2	Molecular Function:translation initiation factor activity (GO:0003743),Biological Process:translational initiation (GO:0006413)
CAFS_HM_T_00021942	2	Molecular Function:glutamate-cysteine ligase activity (GO:0004357),Biological Process:glutathione biosynthetic process (GO:0006750)
CAFS_HM_T_00052356	3	Molecular Function:threonine-type endopeptidase activity (GO:0004298),Cellular Component:proteasome core complex (GO:0005839),Biological Process:proteolysis involved in cellular protein catabolic process (GO:0051603)
CAFS_HM_T_00040341	1	Molecular Function:protein binding (GO:0005515)
CAFS_HM_T_00043371	1	Molecular Function:protein binding (GO:0005515)
CAFS_HM_T_00065878	1	Molecular Function:protein binding (GO:0005515)
CAFS_HM_T_00029332	--	--
CAFS_HM_T_00025437	1	Molecular Function:protein binding (GO:0005515)
CAFS_HM_T_00022714	2	Biological Process:tetrahydrobiopterin biosynthetic process (GO:0006729),Molecular Function:4-alpha-hydroxytetrahydrobiopterin dehydratase activity (GO:0008124)
CAFS_HM_T_00036527	1	Molecular Function:nucleic acid binding (GO:0003676)
CAFS_HM_T_00020780	--	--
CAFS_HM_T_00074929	1	Biological Process:metabolic process (GO:0008152)
CAFS_HM_T_00027047	--	--
CAFS_HM_T_00052702	--	--
CAFS_HM_T_00084153	2	Molecular Function:serine-type carboxypeptidase activity (GO:0004185),Biological Process:proteolysis (GO:0006508)
CAFS_HM_T_00024181	3	Molecular Function:structural constituent of ribosome (GO:0003735),Cellular Component:ribosome (GO:0005840),Biological Process:translation (GO:0006412)
CAFS_HM_T_00029274	2	Molecular Function:nucleic acid binding (GO:0003676),Molecular Function:ATP binding (GO:0005524)
CAFS_HM_T_00036011	3	Cellular Component:proteinaceous extracellular matrix (GO:0005578),Cellular Component:membrane (GO:0016020),Molecular Function:heparan sulfate proteoglycan binding (GO:0043395)
CAFS_HM_T_00070960	--	--
CAFS_HM_T_00091423	--	--
CAFS_HM_T_00065362	2	Molecular Function:nucleic acid binding (GO:0003676),Molecular Function:zinc ion binding (GO:0008270)
CAFS_HM_T_00074590	1	Molecular Function:protein binding (GO:0005515)
CAFS_HM_T_00030374	3	Molecular Function:threonine-type endopeptidase activity (GO:0004298),Cellular Component:proteasome core complex (GO:0005839),Biological Process:proteolysis involved in cellular protein catabolic process (GO:0051603)
CAFS_HM_T_00050022	1	Molecular Function:nucleic acid binding (GO:0003676)
CAFS_HM_T_00080628	3	Molecular Function:thiol-dependent ubiquitin-specific protease activity (GO:0004843),Cellular Component:intracellular (GO:0005622),Biological Process:ubiquitin-dependent protein catabolic process (GO:0006511)
CAFS_HM_T_00029724	--	--
CAFS_HM_T_00034537	4	Molecular Function:catalytic activity (GO:0003824),Molecular Function:scavenger receptor activity (GO:0005044),Biological Process:immune response (GO:0006955),Molecular Function:polysaccharide binding (GO:0030247)
CAFS_HM_T_00072746	4	Molecular Function:damaged DNA binding (GO:0003684),Molecular Function:protein binding (GO:0005515),Biological Process:nucleotide-excision repair (GO:0006289),Biological Process:proteasome-mediated ubiquitin-dependent protein catabolic process (GO:0043161)
CAFS_HM_T_00090824	3	Molecular Function:fatty-acyl-CoA binding (GO:0000062),Biological Process:transport (GO:0006810),Cellular Component:integral component of membrane (GO:0016021)
CAFS_HM_T_00077106	2	Cellular Component:integral component of membrane (GO:0016021),Biological Process:vesicle-mediated transport (GO:0016192)
CAFS_HM_T_00001622	3	Molecular Function:threonine-type endopeptidase activity (GO:0004298),Cellular Component:proteasome core complex (GO:0005839),Biological Process:proteolysis involved in cellular protein catabolic process (GO:0051603)
CAFS_HM_T_00060888	2	Biological Process:metabolic process (GO:0008152),Molecular Function:hydrolase activity (GO:0016787)
CAFS_HM_T_00057721	1	Molecular Function:protein binding (GO:0005515)
CAFS_HM_T_00059937	--	--
CAFS_HM_T_00047947	--	--
CAFS_HM_T_00032980	1	Biological Process:RNA processing (GO:0006396)
CAFS_HM_T_00037535	1	Biological Process:carbohydrate metabolic process (GO:0005975)
CAFS_HM_T_00091153	--	--
CAFS_HM_T_00063456	5	Cellular Component:ruffle (GO:0001726),Molecular Function:actin binding (GO:0003779),Molecular Function:structural constituent of cytoskeleton (GO:0005200),Cellular Component:focal adhesion (GO:0005925),Biological Process:cytoskeletal anchoring at plasma membrane (GO:0007016)
CAFS_HM_T_00062261	3	Molecular Function:protein kinase activity (GO:0004672),Molecular Function:protein binding (GO:0005515),Biological Process:protein phosphorylation (GO:0006468)
CAFS_HM_T_00003662	2	Biological Process:biosynthetic process (GO:0009058),Molecular Function:nucleotidyltransferase activity (GO:0016779)
CAFS_HM_T_00007790	3	Molecular Function:motor activity (GO:0003774),Molecular Function:ATP binding (GO:0005524),Cellular Component:myosin complex (GO:0016459)
CAFS_HM_T_00024561	2	Molecular Function:protein binding (GO:0005515),Cellular Component:membrane (GO:0016020)
CAFS_HM_T_00016607	--	--
CAFS_HM_T_00052068	--	--
CAFS_HM_T_00005949	2	Molecular Function:electron carrier activity (GO:0009055),Molecular Function:iron-sulfur cluster binding (GO:0051536)
CAFS_HM_T_00047334	2	Molecular Function:GTP binding (GO:0005525),Biological Process:small GTPase mediated signal transduction (GO:0007264)
CAFS_HM_T_00048033	--	--
CAFS_HM_T_00045513	--	--
CAFS_HM_T_00049501	1	Molecular Function:protein binding (GO:0005515)
CAFS_HM_T_00033281	1	Molecular Function:protein binding (GO:0005515)
CAFS_HM_T_00008022	4	Molecular Function:acyl-CoA dehydrogenase activity (GO:0003995),Biological Process:metabolic process (GO:0008152),Molecular Function:flavin adenine dinucleotide binding (GO:0050660),Biological Process:oxidation-reduction process (GO:0055114)
CAFS_HM_T_00028769	2	Molecular Function:nucleic acid binding (GO:0003676),Molecular Function:ATP binding (GO:0005524)
CAFS_HM_T_00062028	2	Molecular Function:oxidoreductase activity (GO:0016491),Biological Process:oxidation-reduction process (GO:0055114)
CAFS_HM_T_00004099	1	Molecular Function:hydrolase activity (GO:0016787)
CAFS_HM_T_00064369	1	Molecular Function:DNA binding (GO:0003677)
CAFS_HM_T_00077172	1	Molecular Function:lipid binding (GO:0008289)
CAFS_HM_T_00043751	2	Molecular Function:GTP binding (GO:0005525),Biological Process:small GTPase mediated signal transduction (GO:0007264)
CAFS_HM_T_00071990	--	--
CAFS_HM_T_00084281	4	Molecular Function:nucleic acid binding (GO:0003676),Cellular Component:nucleus (GO:0005634),Biological Process:mRNA processing (GO:0006397),Biological Process:female sex differentiation (GO:0046660)
CAFS_HM_T_00061368	1	Molecular Function:protein binding (GO:0005515)
CAFS_HM_T_00075088	--	--
CAFS_HM_T_00067610	1	Molecular Function:hydrolase activity (GO:0016787)
CAFS_HM_T_00040135	4	Molecular Function:structural constituent of ribosome (GO:0003735),Cellular Component:intracellular (GO:0005622),Cellular Component:ribosome (GO:0005840),Biological Process:translation (GO:0006412)
CAFS_HM_T_00063598	1	Biological Process:metabolic process (GO:0008152)
CAFS_HM_T_00042826	1	Molecular Function:protein binding (GO:0005515)
CAFS_HM_T_00086606	2	Molecular Function:transaminase activity (GO:0008483),Molecular Function:pyridoxal phosphate binding (GO:0030170)
CAFS_HM_T_00040046	2	Biological Process:intracellular protein transport (GO:0006886),Molecular Function:phosphatidylinositol binding (GO:0035091)
CAFS_HM_T_00044825	5	Molecular Function:ATP binding (GO:0005524),Biological Process:transport (GO:0006810),Cellular Component:integral component of membrane (GO:0016021),Molecular Function:ATPase activity (GO:0016887),Biological Process:transmembrane transport (GO:0055085)
CAFS_HM_T_00039766	2	Molecular Function:oxidoreductase activity (GO:0016491),Biological Process:oxidation-reduction process (GO:0055114)
CAFS_HM_T_00041816	2	Cellular Component:nucleus (GO:0005634),Biological Process:ribosome biogenesis (GO:0042254)
CAFS_HM_T_00016837	--	--
CAFS_HM_T_00085450	2	Molecular Function:hydrogen ion transmembrane transporter activity (GO:0015078),Biological Process:ATP hydrolysis coupled proton transport (GO:0015991)
CAFS_HM_T_00053735	4	Molecular Function:ATP binding (GO:0005524),Molecular Function:small protein activating enzyme activity (GO:0008641),Molecular Function:acid-amino acid ligase activity (GO:0016881),Biological Process:protein neddylation (GO:0045116)
CAFS_HM_T_00025198	--	--
CAFS_HM_T_00085326	3	Molecular Function:protein kinase activity (GO:0004672),Molecular Function:protein binding (GO:0005515),Biological Process:protein phosphorylation (GO:0006468)
CAFS_HM_T_00027887	--	--
CAFS_HM_T_00075045	1	Molecular Function:ATP binding (GO:0005524)
CAFS_HM_T_00043452	1	Molecular Function:protein binding (GO:0005515)
CAFS_HM_T_00058804	--	--
CAFS_HM_T_00070369	1	Biological Process:metabolic process (GO:0008152)
CAFS_HM_T_00046641	3	Molecular Function:calcium ion binding (GO:0005509),Biological Process:homophilic cell adhesion via plasma membrane adhesion molecules (GO:0007156),Cellular Component:membrane (GO:0016020)
CAFS_HM_T_00085228	--	--
CAFS_HM_T_00047649	--	--
CAFS_HM_T_00053842	2	Molecular Function:structural molecule activity (GO:0005198),Cellular Component:intermediate filament (GO:0005882)
CAFS_HM_T_00045002	--	--
CAFS_HM_T_00004075	1	Molecular Function:GTP binding (GO:0005525)
CAFS_HM_T_00046389	3	Molecular Function:protein tyrosine phosphatase activity (GO:0004725),Molecular Function:protein binding (GO:0005515),Biological Process:protein dephosphorylation (GO:0006470)
CAFS_HM_T_00021677	2	Molecular Function:calcium ion binding (GO:0005509),Biological Process:cell-matrix adhesion (GO:0007160)
CAFS_HM_T_00065207	--	--
CAFS_HM_T_00034712	3	Molecular Function:magnesium ion binding (GO:0000287),Molecular Function:ribose phosphate diphosphokinase activity (GO:0004749),Biological Process:nucleotide biosynthetic process (GO:0009165)
CAFS_HM_T_00064816	1	Molecular Function:ATP binding (GO:0005524)
CAFS_HM_T_00034080	--	--
CAFS_HM_T_00032449	1	Biological Process:cellular metabolic process (GO:0044237)
CAFS_HM_T_00009257	1	Molecular Function:ubiquitin-protein transferase activity (GO:0004842)
CAFS_HM_T_00016907	1	Molecular Function:protein binding (GO:0005515)
CAFS_HM_T_00072126	2	Biological Process:intracellular protein transport (GO:0006886),Molecular Function:Ran GTPase binding (GO:0008536)
CAFS_HM_T_00006848	2	Molecular Function:catalytic activity (GO:0003824),Biological Process:metabolic process (GO:0008152)
CAFS_HM_T_00065390	3	Molecular Function:nucleic acid binding (GO:0003676),Biological Process:RNA processing (GO:0006396),Molecular Function:RNA methyltransferase activity (GO:0008173)
CAFS_HM_T_00067281	--	--
CAFS_HM_T_00025217	2	Biological Process:metabolic process (GO:0008152),Molecular Function:sulfuric ester hydrolase activity (GO:0008484)
CAFS_HM_T_00060545	--	--
CAFS_HM_T_00019888	--	--
CAFS_HM_T_00003377	2	Cellular Component:intracellular (GO:0005622),Biological Process:transport (GO:0006810)
CAFS_HM_T_00045271	4	Molecular Function:N,N-dimethylaniline monooxygenase activity (GO:0004499),Molecular Function:flavin adenine dinucleotide binding (GO:0050660),Molecular Function:NADP binding (GO:0050661),Biological Process:oxidation-reduction process (GO:0055114)
CAFS_HM_T_00011193	1	Molecular Function:protein binding (GO:0005515)
CAFS_HM_T_00055111	2	Biological Process:metabolic process (GO:0008152),Molecular Function:hydrolase activity (GO:0016787)
CAFS_HM_T_00011866	--	--
CAFS_HM_T_00089762	4	Molecular Function:nucleotide binding (GO:0000166),Molecular Function:aminoacyl-tRNA ligase activity (GO:0004812),Molecular Function:ATP binding (GO:0005524),Biological Process:tRNA aminoacylation for protein translation (GO:0006418)
CAFS_HM_T_00070596	--	--
CAFS_HM_T_00011060	--	--
CAFS_HM_T_00045157	2	Molecular Function:calcium ion binding (GO:0005509),Molecular Function:calcium-dependent phospholipid binding (GO:0005544)
CAFS_HM_T_00012750	3	Molecular Function:protein binding (GO:0005515),Biological Process:rRNA processing (GO:0006364),Cellular Component:small-subunit processome (GO:0032040)
CAFS_HM_T_00003318	2	Molecular Function:metallopeptidase activity (GO:0008237),Molecular Function:zinc ion binding (GO:0008270)
CAFS_HM_T_00019700	2	Molecular Function:GTP binding (GO:0005525),Biological Process:small GTPase mediated signal transduction (GO:0007264)
CAFS_HM_T_00013573	1	Molecular Function:protein binding (GO:0005515)
CAFS_HM_T_00002760	2	Biological Process:ubiquitin-dependent protein catabolic process (GO:0006511),Molecular Function:ubiquitin protein ligase binding (GO:0031625)
CAFS_HM_T_00054609	--	--
CAFS_HM_T_00058261	5	Cellular Component:ubiquitin ligase complex (GO:0000151),Molecular Function:ubiquitin-protein transferase activity (GO:0004842),Biological Process:ubiquitin-dependent protein catabolic process (GO:0006511),Biological Process:protein ubiquitination (GO:0016567),Molecular Function:ubiquitin-ubiquitin ligase activity (GO:0034450)
CAFS_HM_T_00022749	--	--
CAFS_HM_T_00058644	2	Molecular Function:GTP binding (GO:0005525),Biological Process:small GTPase mediated signal transduction (GO:0007264)
CAFS_HM_T_00068002	3	Molecular Function:magnesium ion binding (GO:0000287),Molecular Function:ribose phosphate diphosphokinase activity (GO:0004749),Biological Process:nucleotide biosynthetic process (GO:0009165)
CAFS_HM_T_00088432	2	Molecular Function:oxidoreductase activity (GO:0016491),Biological Process:oxidation-reduction process (GO:0055114)
CAFS_HM_T_00077124	--	--
CAFS_HM_T_00042621	--	--
CAFS_HM_T_00049901	--	--
CAFS_HM_T_00060704	5	Molecular Function:catalytic activity (GO:0003824),Molecular Function:dephospho-CoA kinase activity (GO:0004140),Molecular Function:ATP binding (GO:0005524),Biological Process:biosynthetic process (GO:0009058),Biological Process:coenzyme A biosynthetic process (GO:0015937)
CAFS_HM_T_00032931	3	Molecular Function:nucleic acid binding (GO:0003676),Molecular Function:RNA binding (GO:0003723),Molecular Function:translation initiation factor activity (GO:0003743)
CAFS_HM_T_00083745	--	--
CAFS_HM_T_00009572	5	Molecular Function:nucleotide binding (GO:0000166),Molecular Function:aminoacyl-tRNA ligase activity (GO:0004812),Molecular Function:ATP binding (GO:0005524),Biological Process:tRNA aminoacylation for protein translation (GO:0006418),Biological Process:tRNA aminoacylation (GO:0043039)
CAFS_HM_T_00013641	--	--
CAFS_HM_T_00070380	5	Molecular Function:protein binding (GO:0005515),Cellular Component:nucleus (GO:0005634),Cellular Component:cytoplasm (GO:0005737),Biological Process:protein import into nucleus (GO:0006606),Molecular Function:protein transporter activity (GO:0008565)
CAFS_HM_T_00013438	1	Molecular Function:calcium ion binding (GO:0005509)
CAFS_HM_T_00041753	2	Molecular Function:protein binding (GO:0005515),Cellular Component:membrane (GO:0016020)
CAFS_HM_T_00013853	2	Molecular Function:protein binding (GO:0005515),Molecular Function:zinc ion binding (GO:0008270)
CAFS_HM_T_00083198	2	Molecular Function:serine-type endopeptidase activity (GO:0004252),Biological Process:proteolysis (GO:0006508)
CAFS_HM_T_00087305	5	Molecular Function:endopeptidase activity (GO:0004175),Molecular Function:threonine-type endopeptidase activity (GO:0004298),Cellular Component:proteasome core complex (GO:0005839),Biological Process:ubiquitin-dependent protein catabolic process (GO:0006511),Biological Process:proteolysis involved in cellular protein catabolic process (GO:0051603)
CAFS_HM_T_00078438	1	Biological Process:metabolic process (GO:0008152)
CAFS_HM_T_00020216	--	--
CAFS_HM_T_00054448	1	Molecular Function:protein binding (GO:0005515)
CAFS_HM_T_00091334	1	Molecular Function:protein binding (GO:0005515)
CAFS_HM_T_00055728	1	Molecular Function:nucleic acid binding (GO:0003676)
CAFS_HM_T_00030564	--	--
CAFS_HM_T_00035644	1	Molecular Function:protein binding (GO:0005515)
CAFS_HM_T_00022716	2	Molecular Function:protein binding (GO:0005515),Molecular Function:metal ion binding (GO:0046872)
CAFS_HM_T_00022004	1	Molecular Function:protein binding (GO:0005515)
CAFS_HM_T_00078360	3	Molecular Function:DNA binding (GO:0003677),Molecular Function:ATP-dependent DNA helicase activity (GO:0004003),Biological Process:double-strand break repair via nonhomologous end joining (GO:0006303)
CAFS_HM_T_00034579	2	Molecular Function:galactosylceramidase activity (GO:0004336),Biological Process:galactosylceramide catabolic process (GO:0006683)
CAFS_HM_T_00071340	1	Molecular Function:protein binding (GO:0005515)
CAFS_HM_T_00057019	1	Molecular Function:protein binding (GO:0005515)
CAFS_HM_T_00083072	1	Molecular Function:protein kinase activity (GO:0004672)
CAFS_HM_T_00014645	2	Biological Process:vesicle docking involved in exocytosis (GO:0006904),Biological Process:vesicle-mediated transport (GO:0016192)
CAFS_HM_T_00049169	1	Molecular Function:protein binding (GO:0005515)
CAFS_HM_T_00007742	--	--
CAFS_HM_T_00008832	2	Biological Process:endocytosis (GO:0006897),Cellular Component:membrane (GO:0016020)
CAFS_HM_T_00075498	1	Biological Process:phosphatidylinositol phosphorylation (GO:0046854)
CAFS_HM_T_00043559	--	--
CAFS_HM_T_00050307	1	Molecular Function:protein binding (GO:0005515)
CAFS_HM_T_00081961	1	Biological Process:oxidation-reduction process (GO:0055114)
CAFS_HM_T_00082655	2	Cellular Component:cytoplasm (GO:0005737),Molecular Function:pyrophosphatase activity (GO:0016462)
CAFS_HM_T_00069403	1	Cellular Component:Golgi apparatus (GO:0005794)
CAFS_HM_T_00017856	--	--
CAFS_HM_T_00017802	--	--
CAFS_HM_T_00027109	--	--
CAFS_HM_T_00021023	2	Molecular Function:GTP binding (GO:0005525),Biological Process:small GTPase mediated signal transduction (GO:0007264)
CAFS_HM_T_00064208	1	Molecular Function:protein binding (GO:0005515)
CAFS_HM_T_00024122	2	Cellular Component:nuclear pore (GO:0005643),Biological Process:transport (GO:0006810)
CAFS_HM_T_00091939	--	--
CAFS_HM_T_00070651	--	--
CAFS_HM_T_00007115	--	--
CAFS_HM_T_00025311	1	Molecular Function:hydrolase activity (GO:0016787)
CAFS_HM_T_00068116	1	Molecular Function:protein binding (GO:0005515)
CAFS_HM_T_00086451	4	Molecular Function:acyl-CoA dehydrogenase activity (GO:0003995),Biological Process:metabolic process (GO:0008152),Molecular Function:flavin adenine dinucleotide binding (GO:0050660),Biological Process:oxidation-reduction process (GO:0055114)
CAFS_HM_T_00028027	1	Molecular Function:hydrolase activity (GO:0016787)
CAFS_HM_T_00036986	--	--
CAFS_HM_T_00078889	--	--
CAFS_HM_T_00051523	3	Molecular Function:structural constituent of ribosome (GO:0003735),Cellular Component:ribosome (GO:0005840),Biological Process:translation (GO:0006412)
CAFS_HM_T_00075612	2	Molecular Function:protein binding (GO:0005515),Molecular Function:chaperone binding (GO:0051087)
CAFS_HM_T_00044386	--	--
CAFS_HM_T_00078983	2	Molecular Function:GTP binding (GO:0005525),Biological Process:small GTPase mediated signal transduction (GO:0007264)
CAFS_HM_T_00088635	1	Molecular Function:RNA binding (GO:0003723)
CAFS_HM_T_00065779	--	--
CAFS_HM_T_00059650	--	--
CAFS_HM_T_00059643	--	--
CAFS_HM_T_00023041	1	Cellular Component:integral component of membrane (GO:0016021)
CAFS_HM_T_00003521	--	--
CAFS_HM_T_00045376	2	Molecular Function:catalytic activity (GO:0003824),Biological Process:oxidation-reduction process (GO:0055114)
CAFS_HM_T_00037896	--	--
CAFS_HM_T_00043116	4	Molecular Function:acyl-CoA dehydrogenase activity (GO:0003995),Biological Process:metabolic process (GO:0008152),Molecular Function:flavin adenine dinucleotide binding (GO:0050660),Biological Process:oxidation-reduction process (GO:0055114)
CAFS_HM_T_00010588	--	--
CAFS_HM_T_00013793	1	Molecular Function:GTP binding (GO:0005525)
CAFS_HM_T_00030865	--	--
CAFS_HM_T_00035550	--	--
CAFS_HM_T_00011481	2	Molecular Function:GTP binding (GO:0005525),Biological Process:small GTPase mediated signal transduction (GO:0007264)
CAFS_HM_T_00036156	2	Biological Process:transport (GO:0006810),Cellular Component:integral component of membrane (GO:0016021)
CAFS_HM_T_00005460	5	Molecular Function:GTPase activity (GO:0003924),Molecular Function:signal transducer activity (GO:0004871),Biological Process:G-protein coupled receptor signaling pathway (GO:0007186),Molecular Function:guanyl nucleotide binding (GO:0019001),Molecular Function:G-protein beta/gamma-subunit complex binding (GO:0031683)
CAFS_HM_T_00051736	3	Molecular Function:structural constituent of ribosome (GO:0003735),Cellular Component:ribosome (GO:0005840),Biological Process:translation (GO:0006412)
CAFS_HM_T_00061331	--	--
CAFS_HM_T_00003809	1	Molecular Function:nucleic acid binding (GO:0003676)
CAFS_HM_T_00045434	--	--
CAFS_HM_T_00028506	2	Molecular Function:protein phosphatase inhibitor activity (GO:0004864),Biological Process:signal transduction (GO:0007165)
CAFS_HM_T_00033205	3	Molecular Function:mannosyl-oligosaccharide 1,2-alpha-mannosidase activity (GO:0004571),Molecular Function:calcium ion binding (GO:0005509),Cellular Component:membrane (GO:0016020)
CAFS_HM_T_00058016	1	Biological Process:oxidation-reduction process (GO:0055114)
CAFS_HM_T_00078874	--	--
CAFS_HM_T_00079062	1	Molecular Function:protein binding (GO:0005515)
CAFS_HM_T_00029269	--	--
CAFS_HM_T_00075478	1	Molecular Function:ubiquitin-protein transferase activity (GO:0004842)
CAFS_HM_T_00019869	--	--
CAFS_HM_T_00064723	2	Molecular Function:ATP binding (GO:0005524),Biological Process:carbohydrate metabolic process (GO:0005975)
CAFS_HM_T_00069483	2	Biological Process:cristae formation (GO:0042407),Cellular Component:MICOS complex (GO:0061617)
CAFS_HM_T_00058035	1	Molecular Function:deaminase activity (GO:0019239)
CAFS_HM_T_00015642	1	Molecular Function:protein binding (GO:0005515)
CAFS_HM_T_00042095	--	--
CAFS_HM_T_00083132	2	Molecular Function:Rho guanyl-nucleotide exchange factor activity (GO:0005089),Biological Process:regulation of Rho protein signal transduction (GO:0035023)
CAFS_HM_T_00030063	--	--
CAFS_HM_T_00075413	--	--
CAFS_HM_T_00031815	--	--
CAFS_HM_T_00033012	2	Molecular Function:GTP binding (GO:0005525),Biological Process:small GTPase mediated signal transduction (GO:0007264)
CAFS_HM_T_00064025	1	Molecular Function:GTP binding (GO:0005525)
CAFS_HM_T_00082589	5	Molecular Function:glycerol-3-phosphate dehydrogenase [NAD+] activity (GO:0004367),Biological Process:carbohydrate metabolic process (GO:0005975),Biological Process:glycerol-3-phosphate catabolic process (GO:0046168),Molecular Function:NAD binding (GO:0051287),Biological Process:oxidation-reduction process (GO:0055114)
CAFS_HM_T_00042046	--	--
CAFS_HM_T_00074519	--	--
CAFS_HM_T_00074129	--	--
CAFS_HM_T_00061271	--	--
CAFS_HM_T_00064318	1	Biological Process:carbohydrate metabolic process (GO:0005975)
CAFS_HM_T_00046809	4	Molecular Function:structural constituent of ribosome (GO:0003735),Cellular Component:intracellular (GO:0005622),Cellular Component:ribosome (GO:0005840),Biological Process:translation (GO:0006412)
CAFS_HM_T_00062114	5	Molecular Function:alpha-mannosidase activity (GO:0004559),Biological Process:carbohydrate metabolic process (GO:0005975),Biological Process:mannose metabolic process (GO:0006013),Molecular Function:zinc ion binding (GO:0008270),Molecular Function:mannosidase activity (GO:0015923)
CAFS_HM_T_00069554	--	--
CAFS_HM_T_00074523	1	Molecular Function:GTP binding (GO:0005525)
CAFS_HM_T_00072763	--	--
CAFS_HM_T_00011974	4	Molecular Function:calcium-dependent cysteine-type endopeptidase activity (GO:0004198),Molecular Function:protein binding (GO:0005515),Cellular Component:intracellular (GO:0005622),Biological Process:proteolysis (GO:0006508)
CAFS_HM_T_00085399	1	Molecular Function:phosphoric ester hydrolase activity (GO:0042578)
CAFS_HM_T_00059251	6	Molecular Function:protein kinase activity (GO:0004672),Molecular Function:transmembrane receptor protein tyrosine kinase activity (GO:0004714),Molecular Function:ATP binding (GO:0005524),Biological Process:protein phosphorylation (GO:0006468),Biological Process:transmembrane receptor protein tyrosine kinase signaling pathway (GO:0007169),Cellular Component:membrane (GO:0016020)
CAFS_HM_T_00075301	2	Molecular Function:GTP binding (GO:0005525),Biological Process:small GTPase mediated signal transduction (GO:0007264)
CAFS_HM_T_00026802	1	Biological Process:carbohydrate metabolic process (GO:0005975)
CAFS_HM_T_00092266	2	Biological Process:transport (GO:0006810),Cellular Component:integral component of membrane (GO:0016021)
CAFS_HM_T_00014881	1	Molecular Function:nucleic acid binding (GO:0003676)
CAFS_HM_T_00052115	6	Molecular Function:purinergic nucleotide receptor activity (GO:0001614),Molecular Function:extracellular ATP-gated cation channel activity (GO:0004931),Cellular Component:integral component of plasma membrane (GO:0005887),Biological Process:response to ATP (GO:0033198),Biological Process:oxidation-reduction process (GO:0055114),Biological Process:cation transmembrane transport (GO:0098655)
CAFS_HM_T_00067746	--	--
CAFS_HM_T_00013217	--	--
CAFS_HM_T_00028403	3	Molecular Function:protein kinase activity (GO:0004672),Molecular Function:ATP binding (GO:0005524),Biological Process:protein phosphorylation (GO:0006468)
CAFS_HM_T_00077299	2	Molecular Function:nucleic acid binding (GO:0003676),Molecular Function:exonuclease activity (GO:0004527)
CAFS_HM_T_00049002	5	Molecular Function:metalloendopeptidase activity (GO:0004222),Molecular Function:ATP binding (GO:0005524),Biological Process:proteolysis (GO:0006508),Molecular Function:zinc ion binding (GO:0008270),Cellular Component:integral component of membrane (GO:0016021)
CAFS_HM_T_00051621	1	Molecular Function:nucleic acid binding (GO:0003676)
CAFS_HM_T_00071997	2	Cellular Component:extracellular region (GO:0005576),Cellular Component:extracellular space (GO:0005615)
CAFS_HM_T_00057818	--	--
CAFS_HM_T_00034062	--	--
CAFS_HM_T_00004427	5	Molecular Function:serine-type endopeptidase activity (GO:0004252),Molecular Function:calcium ion binding (GO:0005509),Molecular Function:protein binding (GO:0005515),Cellular Component:extracellular region (GO:0005576),Biological Process:proteolysis (GO:0006508)
CAFS_HM_T_00085466	3	Molecular Function:mannosyl-oligosaccharide 1,2-alpha-mannosidase activity (GO:0004571),Molecular Function:calcium ion binding (GO:0005509),Cellular Component:membrane (GO:0016020)
CAFS_HM_T_00045398	1	Molecular Function:phospholipid binding (GO:0005543)
CAFS_HM_T_00091984	--	--
CAFS_HM_T_00009540	2	Molecular Function:catalytic activity (GO:0003824),Biological Process:metabolic process (GO:0008152)
CAFS_HM_T_00062930	1	Biological Process:carbohydrate metabolic process (GO:0005975)
CAFS_HM_T_00013218	5	Molecular Function:GTPase activity (GO:0003924),Molecular Function:signal transducer activity (GO:0004871),Biological Process:G-protein coupled receptor signaling pathway (GO:0007186),Molecular Function:guanyl nucleotide binding (GO:0019001),Molecular Function:G-protein beta/gamma-subunit complex binding (GO:0031683)
CAFS_HM_T_00012580	--	--
CAFS_HM_T_00047828	1	Molecular Function:ATP binding (GO:0005524)
CAFS_HM_T_00019822	2	Biological Process:mature ribosome assembly (GO:0042256),Molecular Function:ribosome binding (GO:0043022)
CAFS_HM_T_00015779	--	--
CAFS_HM_T_00052091	4	Cellular Component:cytoskeleton (GO:0005856),Cellular Component:Arp2/3 protein complex (GO:0005885),Biological Process:regulation of actin filament polymerization (GO:0030833),Biological Process:Arp2/3 complex-mediated actin nucleation (GO:0034314)
CAFS_HM_T_00028194	--	--
CAFS_HM_T_00031109	--	--
CAFS_HM_T_00059792	2	Molecular Function:ARF guanyl-nucleotide exchange factor activity (GO:0005086),Biological Process:regulation of ARF protein signal transduction (GO:0032012)
CAFS_HM_T_00092107	4	Molecular Function:protein kinase activity (GO:0004672),Molecular Function:protein serine/threonine kinase activity (GO:0004674),Molecular Function:ATP binding (GO:0005524),Biological Process:protein phosphorylation (GO:0006468)
CAFS_HM_T_00060556	--	--
CAFS_HM_T_00088951	2	Biological Process:proteolysis (GO:0006508),Molecular Function:serine-type peptidase activity (GO:0008236)
CAFS_HM_T_00005939	2	Molecular Function:GTP binding (GO:0005525),Biological Process:small GTPase mediated signal transduction (GO:0007264)
CAFS_HM_T_00029017	5	Molecular Function:DNA binding (GO:0003677),Molecular Function:DNA topoisomerase type II (ATP-hydrolyzing) activity (GO:0003918),Molecular Function:ATP binding (GO:0005524),Cellular Component:nucleus (GO:0005634),Biological Process:DNA topological change (GO:0006265)
CAFS_HM_T_00052945	2	Molecular Function:GTP binding (GO:0005525),Biological Process:small GTPase mediated signal transduction (GO:0007264)
CAFS_HM_T_00004595	1	Molecular Function:nucleic acid binding (GO:0003676)
CAFS_HM_T_00033554	4	Molecular Function:superoxide dismutase activity (GO:0004784),Biological Process:superoxide metabolic process (GO:0006801),Molecular Function:metal ion binding (GO:0046872),Biological Process:oxidation-reduction process (GO:0055114)
CAFS_HM_T_00040812	2	Molecular Function:translation initiation factor activity (GO:0003743),Biological Process:translational initiation (GO:0006413)
CAFS_HM_T_00033991	3	Molecular Function:iron ion binding (GO:0005506),Molecular Function:heme binding (GO:0020037),Biological Process:oxidation-reduction process (GO:0055114)
CAFS_HM_T_00080065	2	Cellular Component:mitochondrion (GO:0005739),Cellular Component:mitochondrial respiratory chain complex I (GO:0005747)
CAFS_HM_T_00076764	2	Molecular Function:ATP binding (GO:0005524),Molecular Function:ATPase activity (GO:0016887)
CAFS_HM_T_00025026	--	--
CAFS_HM_T_00089687	--	--
CAFS_HM_T_00074674	4	Molecular Function:protein kinase activity (GO:0004672),Molecular Function:ATP binding (GO:0005524),Biological Process:protein phosphorylation (GO:0006468),Molecular Function:Rho GTPase binding (GO:0017048)
CAFS_HM_T_00034064	2	Biological Process:protein targeting (GO:0006605),Biological Process:signal transduction (GO:0007165)
CAFS_HM_T_00056934	1	Molecular Function:zinc ion binding (GO:0008270)
CAFS_HM_T_00065854	4	Molecular Function:motor activity (GO:0003774),Molecular Function:protein binding (GO:0005515),Molecular Function:ATP binding (GO:0005524),Cellular Component:myosin complex (GO:0016459)
CAFS_HM_T_00011709	3	Molecular Function:iron ion binding (GO:0005506),Molecular Function:heme binding (GO:0020037),Biological Process:oxidation-reduction process (GO:0055114)
CAFS_HM_T_00029710	2	Biological Process:proteolysis (GO:0006508),Molecular Function:cysteine-type peptidase activity (GO:0008234)
CAFS_HM_T_00027515	2	Molecular Function:nucleic acid binding (GO:0003676),Molecular Function:ATP binding (GO:0005524)
CAFS_HM_T_00027096	1	Cellular Component:presynaptic active zone (GO:0048786)
CAFS_HM_T_00082762	--	--
CAFS_HM_T_00013890	2	Cellular Component:intracellular (GO:0005622),Biological Process:transport (GO:0006810)
CAFS_HM_T_00001144	2	Molecular Function:nucleic acid binding (GO:0003676),Molecular Function:ATP binding (GO:0005524)
CAFS_HM_T_00074314	1	Molecular Function:protein binding (GO:0005515)
CAFS_HM_T_00086450	--	--
CAFS_HM_T_00015448	1	Molecular Function:nucleic acid binding (GO:0003676)
CAFS_HM_T_00014612	1	Molecular Function:nucleic acid binding (GO:0003676)
CAFS_HM_T_00010684	--	--
CAFS_HM_T_00073078	--	--
CAFS_HM_T_00057233	2	Molecular Function:protein binding (GO:0005515),Cellular Component:membrane (GO:0016020)
CAFS_HM_T_00078343	--	--
CAFS_HM_T_00010311	5	Molecular Function:iron ion binding (GO:0005506),Cellular Component:cytoplasm (GO:0005737),Biological Process:inositol catabolic process (GO:0019310),Molecular Function:inositol oxygenase activity (GO:0050113),Biological Process:oxidation-reduction process (GO:0055114)
CAFS_HM_T_00040002	--	--
CAFS_HM_T_00015700	2	Molecular Function:glycogen (starch) synthase activity (GO:0004373),Biological Process:glycogen biosynthetic process (GO:0005978)
CAFS_HM_T_00006502	--	--
CAFS_HM_T_00024516	--	--
CAFS_HM_T_00065937	2	Molecular Function:DNA binding (GO:0003677),Molecular Function:transcription coactivator activity (GO:0003713)
CAFS_HM_T_00005063	--	--
CAFS_HM_T_00020422	1	Cellular Component:intracellular membrane-bounded organelle (GO:0043231)
CAFS_HM_T_00016510	2	Molecular Function:electron carrier activity (GO:0009055),Molecular Function:heme binding (GO:0020037)
CAFS_HM_T_00061499	--	--
CAFS_HM_T_00084075	3	Molecular Function:Rho guanyl-nucleotide exchange factor activity (GO:0005089),Molecular Function:protein binding (GO:0005515),Biological Process:regulation of Rho protein signal transduction (GO:0035023)
CAFS_HM_T_00072533	1	Biological Process:oxidation-reduction process (GO:0055114)
CAFS_HM_T_00036899	2	Molecular Function:protein binding (GO:0005515),Molecular Function:zinc ion binding (GO:0008270)
CAFS_HM_T_00026076	5	Molecular Function:GTPase activity (GO:0003924),Molecular Function:signal transducer activity (GO:0004871),Biological Process:G-protein coupled receptor signaling pathway (GO:0007186),Molecular Function:guanyl nucleotide binding (GO:0019001),Molecular Function:G-protein beta/gamma-subunit complex binding (GO:0031683)
CAFS_HM_T_00054757	2	Molecular Function:GTP binding (GO:0005525),Biological Process:small GTPase mediated signal transduction (GO:0007264)
CAFS_HM_T_00063581	2	Molecular Function:cytochrome-c oxidase activity (GO:0004129),Cellular Component:mitochondrial inner membrane (GO:0005743)
CAFS_HM_T_00087865	--	--
CAFS_HM_T_00082216	1	Molecular Function:methyltransferase activity (GO:0008168)
CAFS_HM_T_00034327	2	Biological Process:protein deubiquitination (GO:0016579),Molecular Function:thiol-dependent ubiquitinyl hydrolase activity (GO:0036459)
CAFS_HM_T_00084358	3	Molecular Function:protein kinase activity (GO:0004672),Molecular Function:ATP binding (GO:0005524),Biological Process:protein phosphorylation (GO:0006468)
CAFS_HM_T_00039746	--	--
CAFS_HM_T_00022543	4	Molecular Function:structural constituent of ribosome (GO:0003735),Cellular Component:intracellular (GO:0005622),Cellular Component:ribosome (GO:0005840),Biological Process:translation (GO:0006412)
CAFS_HM_T_00052672	1	Cellular Component:membrane (GO:0016020)
CAFS_HM_T_00048834	1	Molecular Function:protein binding (GO:0005515)
CAFS_HM_T_00028163	--	--
CAFS_HM_T_00011215	1	Molecular Function:protein binding (GO:0005515)
CAFS_HM_T_00056507	1	Molecular Function:protein binding (GO:0005515)
CAFS_HM_T_00028772	2	Cellular Component:mitochondrial outer membrane (GO:0005741),Biological Process:transmembrane transport (GO:0055085)
CAFS_HM_T_00027638	2	Molecular Function:hydrogen ion transmembrane transporter activity (GO:0015078),Biological Process:ATP hydrolysis coupled proton transport (GO:0015991)
CAFS_HM_T_00074678	3	Molecular Function:protein binding (GO:0005515),Biological Process:biosynthetic process (GO:0009058),Molecular Function:nucleotidyltransferase activity (GO:0016779)
CAFS_HM_T_00064123	--	--
CAFS_HM_T_00008575	--	--
CAFS_HM_T_00053871	--	--
CAFS_HM_T_00053358	4	Molecular Function:structural constituent of ribosome (GO:0003735),Cellular Component:intracellular (GO:0005622),Cellular Component:ribosome (GO:0005840),Biological Process:translation (GO:0006412)
CAFS_HM_T_00045469	1	Molecular Function:calcium ion binding (GO:0005509)
CAFS_HM_T_00036835	1	Molecular Function:protein binding (GO:0005515)
CAFS_HM_T_00083157	2	Molecular Function:nucleic acid binding (GO:0003676),Molecular Function:ATP binding (GO:0005524)
CAFS_HM_T_00028625	--	--
CAFS_HM_T_00069163	3	Molecular Function:iron ion binding (GO:0005506),Molecular Function:heme binding (GO:0020037),Biological Process:oxidation-reduction process (GO:0055114)
CAFS_HM_T_00082869	5	Molecular Function:DNA binding (GO:0003677),Molecular Function:protein binding (GO:0005515),Molecular Function:ATP binding (GO:0005524),Cellular Component:nucleus (GO:0005634),Molecular Function:zinc ion binding (GO:0008270)
CAFS_HM_T_00050818	1	Molecular Function:lipid binding (GO:0008289)
CAFS_HM_T_00038172	2	Molecular Function:GTP binding (GO:0005525),Biological Process:small GTPase mediated signal transduction (GO:0007264)
CAFS_HM_T_00034902	--	--
CAFS_HM_T_00052121	1	Molecular Function:protein binding (GO:0005515)
CAFS_HM_T_00073918	--	--
CAFS_HM_T_00040216	1	Biological Process:ubiquitin-dependent protein catabolic process (GO:0006511)
CAFS_HM_T_00049301	4	Biological Process:intracellular protein transport (GO:0006886),Biological Process:ER to Golgi vesicle-mediated transport (GO:0006888),Molecular Function:zinc ion binding (GO:0008270),Cellular Component:COPII vesicle coat (GO:0030127)
CAFS_HM_T_00076300	--	--
CAFS_HM_T_00048201	2	Molecular Function:serine-type carboxypeptidase activity (GO:0004185),Biological Process:proteolysis (GO:0006508)
CAFS_HM_T_00009332	--	--
CAFS_HM_T_00059157	1	Biological Process:metabolic process (GO:0008152)
CAFS_HM_T_00021549	2	Molecular Function:metallopeptidase activity (GO:0008237),Molecular Function:zinc ion binding (GO:0008270)
CAFS_HM_T_00040372	--	--
CAFS_HM_T_00034325	3	Molecular Function:oxidoreductase activity (GO:0016491),Molecular Function:flavin adenine dinucleotide binding (GO:0050660),Biological Process:oxidation-reduction process (GO:0055114)
CAFS_HM_T_00081039	--	--
CAFS_HM_T_00036378	--	--
CAFS_HM_T_00013239	2	Cellular Component:cytoplasm (GO:0005737),Molecular Function:mannosyl-glycoprotein endo-beta-N-acetylglucosaminidase activity (GO:0033925)
CAFS_HM_T_00023274	--	--
CAFS_HM_T_00045368	1	Biological Process:oxidation-reduction process (GO:0055114)
CAFS_HM_T_00027634	--	--
CAFS_HM_T_00076952	1	Cellular Component:integral component of membrane (GO:0016021)
CAFS_HM_T_00018460	--	--
CAFS_HM_T_00018748	1	Molecular Function:aminoacyl-tRNA hydrolase activity (GO:0004045)
CAFS_HM_T_00009089	--	--
CAFS_HM_T_00074135	2	Molecular Function:GTP binding (GO:0005525),Biological Process:small GTPase mediated signal transduction (GO:0007264)
CAFS_HM_T_00029894	2	Molecular Function:nucleic acid binding (GO:0003676),Molecular Function:protein binding (GO:0005515)
CAFS_HM_T_00013227	1	Molecular Function:protein binding (GO:0005515)
CAFS_HM_T_00025150	1	Molecular Function:nucleic acid binding (GO:0003676)
CAFS_HM_T_00057283	--	--
CAFS_HM_T_00078043	--	--
CAFS_HM_T_00082332	2	Molecular Function:catalytic activity (GO:0003824),Biological Process:nucleoside metabolic process (GO:0009116)
CAFS_HM_T_00004769	2	Molecular Function:GTP binding (GO:0005525),Biological Process:small GTPase mediated signal transduction (GO:0007264)
CAFS_HM_T_00084251	1	Molecular Function:protein binding (GO:0005515)
CAFS_HM_T_00021212	--	--
CAFS_HM_T_00069373	--	--
CAFS_HM_T_00061447	--	--
CAFS_HM_T_00015597	3	Molecular Function:structural constituent of ribosome (GO:0003735),Cellular Component:ribosome (GO:0005840),Biological Process:translation (GO:0006412)
[truncated: 4,796 more rows]

## Sheet: COG_anno
COG annotation of total quantified proteins in liver.
Protein	COG_Function_Description	COG_Function_Class	COG_Class_Description
CAFS_HM_T_00043379	NADP-dependent 3-hydroxy acid dehydrogenase YdfG	C	Energy production and conversion ;
CAFS_HM_T_00033529	--	--	--
CAFS_HM_T_00052219	--	--	--
CAFS_HM_T_00091449	--	--	--
CAFS_HM_T_00066111	--	--	--
CAFS_HM_T_00056393	Uncharacterized surface anchored protein	S	Function unknown ;
CAFS_HM_T_00065840	--	--	--
CAFS_HM_T_00020544	Glucan phosphorylase	G	Carbohydrate transport and metabolism ;
CAFS_HM_T_00016615	Chromosome segregation ATPase	D	Cell cycle control, cell division, chromosome partitioning ;
CAFS_HM_T_00075212	Glycogen debranching enzyme (alpha-1,6-glucosidase)	G	Carbohydrate transport and metabolism ;
CAFS_HM_T_00006824	--	--	--
CAFS_HM_T_00007488	--	--	--
CAFS_HM_T_00002604	Uncharacterized membrane protein YhgE, phage infection protein (PIP) family	S	Function unknown ;
CAFS_HM_T_00082002	--	--	--
CAFS_HM_T_00069903	Uncharacterized conserved protein YfaS, alpha-2-macroglobulin family	R	General function prediction only ;
CAFS_HM_T_00016898	Acyl-CoA reductase or other NAD-dependent aldehyde dehydrogenase	C	Energy production and conversion ;
CAFS_HM_T_00020688	Transcription elongation factor	K	Transcription ;
CAFS_HM_T_00018962	--	--	--
CAFS_HM_T_00091029	Formyltetrahydrofolate synthetase	F	Nucleotide transport and metabolism ;
CAFS_HM_T_00077351	MinD superfamily P-loop ATPase, contains an inserted ferredoxin domain	R	General function prediction only ;
CAFS_HM_T_00008668	Xanthine dehydrogenase, molybdopterin-binding subunit B	F	Nucleotide transport and metabolism ;
CAFS_HM_T_00069913	Uncharacterized conserved protein YfaS, alpha-2-macroglobulin family	R	General function prediction only ;
CAFS_HM_T_00068886	Biotin carboxylase	I	Lipid transport and metabolism ;
CAFS_HM_T_00008672	Xanthine dehydrogenase, molybdopterin-binding subunit B	F	Nucleotide transport and metabolism ;
CAFS_HM_T_00007003	Glycine/D-amino acid oxidase (deaminating)	E	Amino acid transport and metabolism ;
CAFS_HM_T_00038448	Predicted NTPase, NACHT family domain	T	Signal transduction mechanisms ;
CAFS_HM_T_00001240	Xanthine dehydrogenase, molybdopterin-binding subunit B	F	Nucleotide transport and metabolism ;
CAFS_HM_T_00086417	--	--	--
CAFS_HM_T_00066950	Acyl-CoA reductase or other NAD-dependent aldehyde dehydrogenase	C	Energy production and conversion ;
CAFS_HM_T_00087005	--	--	--
CAFS_HM_T_00058021	Glucose/arabinose dehydrogenase, beta-propeller fold	G	Carbohydrate transport and metabolism ;
CAFS_HM_T_00025415	Molecular chaperone, HSP90 family	O	Posttranslational modification, protein turnover, chaperones ;
CAFS_HM_T_00053889	FoF1-type ATP synthase, beta subunit	C	Energy production and conversion ;
CAFS_HM_T_00059889	Phosphoenolpyruvate carboxykinase, GTP-dependent	C	Energy production and conversion ;
CAFS_HM_T_00073885	Methionine synthase I (cobalamin-dependent), methyltransferase domain	E	Amino acid transport and metabolism ;
CAFS_HM_T_00056851	--	--	--
CAFS_HM_T_00005153	--	--	--
CAFS_HM_T_00071979	Uncharacterized conserved protein YfaS, alpha-2-macroglobulin family	R	General function prediction only ;
CAFS_HM_T_00037723	Acyl-CoA reductase or other NAD-dependent aldehyde dehydrogenase	C	Energy production and conversion ;
CAFS_HM_T_00040139	Acetyl-CoA acetyltransferase	I	Lipid transport and metabolism ;
CAFS_HM_T_00001368	--	--	--
CAFS_HM_T_00062807	Catalase	P	Inorganic ion transport and metabolism ;
CAFS_HM_T_00058972	Transketolase	G	Carbohydrate transport and metabolism ;
CAFS_HM_T_00021537	Zn-dependent alcohol dehydrogenase	R	General function prediction only ;
CAFS_HM_T_00070529	UDP-N-acetylglucosamine pyrophosphorylase	G	Carbohydrate transport and metabolism ;
CAFS_HM_T_00090940	Prolyl-tRNA synthetase	J	Translation, ribosomal structure and biogenesis ;
CAFS_HM_T_00051391	3-phosphoglycerate kinase	G	Carbohydrate transport and metabolism ;
CAFS_HM_T_00028012	Translation elongation factor EF-1alpha (GTPase)	J	Translation, ribosomal structure and biogenesis ;
CAFS_HM_T_00008690	Glutamate formiminotransferase	E	Amino acid transport and metabolism ;
CAFS_HM_T_00024150	--	--	--
CAFS_HM_T_00017823	S-adenosylhomocysteine hydrolase	H	Coenzyme transport and metabolism ;
CAFS_HM_T_00056689	--	--	--
CAFS_HM_T_00060981	Homogentisate 1,2-dioxygenase	Q	Secondary metabolites biosynthesis, transport and catabolism ;
CAFS_HM_T_00062164	Saccharopine dehydrogenase, NADP-dependent	E	Amino acid transport and metabolism ;
CAFS_HM_T_00057299	Ubiquitin	O	Posttranslational modification, protein turnover, chaperones ;
CAFS_HM_T_00015632	Citrate synthase	C	Energy production and conversion ;
CAFS_HM_T_00073307	CBS domain	T	Signal transduction mechanisms ;
CAFS_HM_T_00065957	ATP-dependent 26S proteasome regulatory subunit	O	Posttranslational modification, protein turnover, chaperones ;
CAFS_HM_T_00067579	Uncharacterized membrane protein YhgE, phage infection protein (PIP) family	S	Function unknown ;
CAFS_HM_T_00076966	Aspartate/methionine/tyrosine aminotransferase	E	Amino acid transport and metabolism ;
CAFS_HM_T_00004550	Molecular chaperone DnaK (HSP70)	O	Posttranslational modification, protein turnover, chaperones ;
CAFS_HM_T_00069911	Uncharacterized conserved protein YfaS, alpha-2-macroglobulin family	R	General function prediction only ;
CAFS_HM_T_00013725	4-aminobutyrate aminotransferase or related aminotransferase	E	Amino acid transport and metabolism ;
CAFS_HM_T_00052961	--	--	--
CAFS_HM_T_00069365	Molecular chaperone DnaK (HSP70)	O	Posttranslational modification, protein turnover, chaperones ;
CAFS_HM_T_00069909	Uncharacterized conserved protein YfaS, alpha-2-macroglobulin family	R	General function prediction only ;
CAFS_HM_T_00091877	Glucan phosphorylase	G	Carbohydrate transport and metabolism ;
CAFS_HM_T_00073631	Actin-related protein	Z	Cytoskeleton ;
CAFS_HM_T_00031810	Acetyl-CoA acetyltransferase	I	Lipid transport and metabolism ;
CAFS_HM_T_00067042	4-hydroxyphenylpyruvate dioxygenase and related hemolysins	ER	Amino acid transport and metabolism ; General function prediction only ;
CAFS_HM_T_00031182	Phage-related protein, tail component	X	Mobilome: prophages, transposons;
CAFS_HM_T_00088194	Molecular chaperone DnaK (HSP70)	O	Posttranslational modification, protein turnover, chaperones ;
CAFS_HM_T_00068655	Glycine cleavage system protein P (pyridoxal-binding), C-terminal domain	E	Amino acid transport and metabolism ;
CAFS_HM_T_00041145	Choline dehydrogenase or related flavoprotein	IR	Lipid transport and metabolism ; General function prediction only ;
CAFS_HM_T_00053890	ABC-type multidrug transport system, ATPase and permease component	V	Defense mechanisms ;
CAFS_HM_T_00031096	--	--	--
CAFS_HM_T_00076215	Glycine/D-amino acid oxidase (deaminating)	E	Amino acid transport and metabolism ;
CAFS_HM_T_00008248	Uncharacterized conserved protein YukE	S	Function unknown ;
CAFS_HM_T_00078205	--	--	--
CAFS_HM_T_00028830	--	--	--
CAFS_HM_T_00092258	Acyl-CoA reductase or other NAD-dependent aldehyde dehydrogenase	C	Energy production and conversion ;
CAFS_HM_T_00083690	Phosphohistidine swiveling domain of PEP-utilizing enzymes	T	Signal transduction mechanisms ;
CAFS_HM_T_00016955	Negative regulator of GroEL, contains thioredoxin-like and TPR-like domains	O	Posttranslational modification, protein turnover, chaperones ;
CAFS_HM_T_00032924	Molecular chaperone, HSP90 family	O	Posttranslational modification, protein turnover, chaperones ;
CAFS_HM_T_00074112	--	--	--
CAFS_HM_T_00089476	Lysophospholipase, alpha-beta hydrolase superfamily	I	Lipid transport and metabolism ;
CAFS_HM_T_00067593	--	--	--
CAFS_HM_T_00036477	Fructose-bisphosphate aldolase class 1	G	Carbohydrate transport and metabolism ;
CAFS_HM_T_00090889	3-hydroxyacyl-CoA dehydrogenase	I	Lipid transport and metabolism ;
CAFS_HM_T_00045305	--	--	--
CAFS_HM_T_00037540	Molecular chaperone DnaK (HSP70)	O	Posttranslational modification, protein turnover, chaperones ;
CAFS_HM_T_00054669	Acyl-CoA reductase or other NAD-dependent aldehyde dehydrogenase	C	Energy production and conversion ;
CAFS_HM_T_00071211	Phage-related protein, tail component	X	Mobilome: prophages, transposons;
CAFS_HM_T_00065717	Fructose-1,6-bisphosphatase	G	Carbohydrate transport and metabolism ;
CAFS_HM_T_00085816	Cytochrome P450	QV	Secondary metabolites biosynthesis, transport and catabolism ; Defense mechanisms ;
CAFS_HM_T_00043005	--	--	--
CAFS_HM_T_00075861	Predicted NTPase, NACHT family domain	T	Signal transduction mechanisms ;
CAFS_HM_T_00057224	--	--	--
CAFS_HM_T_00020610	--	--	--
CAFS_HM_T_00088307	Uncharacterized conserved protein YfaS, alpha-2-macroglobulin family	R	General function prediction only ;
CAFS_HM_T_00063291	Carboxylesterase type B	I	Lipid transport and metabolism ;
CAFS_HM_T_00071148	Magnesium-transporting ATPase (P-type)	P	Inorganic ion transport and metabolism ;
CAFS_HM_T_00052531	FoF1-type ATP synthase, alpha subunit	C	Energy production and conversion ;
CAFS_HM_T_00081275	3-hydroxyacyl-CoA dehydrogenase	I	Lipid transport and metabolism ;
CAFS_HM_T_00035112	Cyclopropane fatty-acyl-phospholipid synthase and related methyltransferases	I	Lipid transport and metabolism ;
CAFS_HM_T_00063618	Negative regulator of GroEL, contains thioredoxin-like and TPR-like domains	O	Posttranslational modification, protein turnover, chaperones ;
CAFS_HM_T_00010012	Alanyl-tRNA synthetase	J	Translation, ribosomal structure and biogenesis ;
CAFS_HM_T_00052088	Magnesium-transporting ATPase (P-type)	P	Inorganic ion transport and metabolism ;
CAFS_HM_T_00038735	Replicative superfamily II helicase	L	Replication, recombination and repair ;
CAFS_HM_T_00061120	Negative regulator of GroEL, contains thioredoxin-like and TPR-like domains	O	Posttranslational modification, protein turnover, chaperones ;
CAFS_HM_T_00085804	--	--	--
CAFS_HM_T_00088295	Uncharacterized conserved protein YfaS, alpha-2-macroglobulin family	R	General function prediction only ;
CAFS_HM_T_00046525	Aconitase A	C	Energy production and conversion ;
CAFS_HM_T_00085817	Cytochrome P450	QV	Secondary metabolites biosynthesis, transport and catabolism ; Defense mechanisms ;
CAFS_HM_T_00058936	--	--	--
CAFS_HM_T_00031519	Carbamoylphosphate synthase small subunit	EF	Amino acid transport and metabolism ; Nucleotide transport and metabolism ;
CAFS_HM_T_00028841	--	--	--
CAFS_HM_T_00051948	Acyl CoA:acetate/3-ketoacid CoA transferase, beta subunit	I	Lipid transport and metabolism ;
CAFS_HM_T_00005387	--	--	--
CAFS_HM_T_00018974	Dihydroorotase or related cyclic amidohydrolase	F	Nucleotide transport and metabolism ;
CAFS_HM_T_00088555	--	--	--
CAFS_HM_T_00024417	Phenylalanine-4-hydroxylase	E	Amino acid transport and metabolism ;
CAFS_HM_T_00074967	Acetyl-CoA acetyltransferase	I	Lipid transport and metabolism ;
CAFS_HM_T_00073537	AICAR transformylase/IMP cyclohydrolase PurH	F	Nucleotide transport and metabolism ;
CAFS_HM_T_00078997	Isocitrate dehydrogenase	C	Energy production and conversion ;
CAFS_HM_T_00052299	4-aminobutyrate aminotransferase or related aminotransferase	E	Amino acid transport and metabolism ;
CAFS_HM_T_00022076	--	--	--
CAFS_HM_T_00017666	NAD(P)-dependent dehydrogenase, short-chain alcohol dehydrogenase family	IQR	Lipid transport and metabolism ; Secondary metabolites biosynthesis, transport and catabolism ; General function prediction only ;
CAFS_HM_T_00062655	2-oxoglutarate dehydrogenase complex, dehydrogenase (E1) component, and related enzymes	C	Energy production and conversion ;
CAFS_HM_T_00084393	Magnesium-transporting ATPase (P-type)	P	Inorganic ion transport and metabolism ;
CAFS_HM_T_00073772	--	--	--
CAFS_HM_T_00053004	--	--	--
CAFS_HM_T_00092009	--	--	--
CAFS_HM_T_00033005	3-hydroxyacyl-CoA dehydrogenase	I	Lipid transport and metabolism ;
CAFS_HM_T_00013083	Glycine/serine hydroxymethyltransferase	E	Amino acid transport and metabolism ;
CAFS_HM_T_00015429	Acyl-CoA reductase or other NAD-dependent aldehyde dehydrogenase	C	Energy production and conversion ;
CAFS_HM_T_00051701	Pyruvate carboxylase	C	Energy production and conversion ;
CAFS_HM_T_00082797	Malic enzyme	C	Energy production and conversion ;
CAFS_HM_T_00026478	--	--	--
CAFS_HM_T_00019121	Phosphoglucomutase	G	Carbohydrate transport and metabolism ;
CAFS_HM_T_00051204	Leucyl-tRNA synthetase	J	Translation, ribosomal structure and biogenesis ;
CAFS_HM_T_00090923	--	--	--
CAFS_HM_T_00004827	Acetyl-CoA acetyltransferase	I	Lipid transport and metabolism ;
CAFS_HM_T_00071989	Uncharacterized conserved protein YfaS, alpha-2-macroglobulin family	R	General function prediction only ;
CAFS_HM_T_00043643	Glutamate dehydrogenase/leucine dehydrogenase	E	Amino acid transport and metabolism ;
CAFS_HM_T_00048267	Acyl-CoA dehydrogenase related to the alkylation response protein AidB	I	Lipid transport and metabolism ;
CAFS_HM_T_00047396	--	--	--
CAFS_HM_T_00009042	--	--	--
CAFS_HM_T_00043946	Actin-related protein	Z	Cytoskeleton ;
CAFS_HM_T_00073708	--	--	--
CAFS_HM_T_00042658	RNA recognition motif (RRM) domain	J	Translation, ribosomal structure and biogenesis ;
CAFS_HM_T_00039192	2-oxoglutarate dehydrogenase complex, dehydrogenase (E1) component, and related enzymes	C	Energy production and conversion ;
CAFS_HM_T_00018426	Sugar lactone lactonase YvrE	G	Carbohydrate transport and metabolism ;
CAFS_HM_T_00047885	2-keto-4-pentenoate hydratase/2-oxohepta-3-ene-1,7-dioic acid hydratase (catechol pathway)	Q	Secondary metabolites biosynthesis, transport and catabolism ;
CAFS_HM_T_00055842	--	--	--
CAFS_HM_T_00062658	Histidine ammonia-lyase	E	Amino acid transport and metabolism ;
CAFS_HM_T_00033330	Pimeloyl-ACP methyl ester carboxylesterase	HR	Coenzyme transport and metabolism ; General function prediction only ;
CAFS_HM_T_00006740	Acyl-CoA reductase or other NAD-dependent aldehyde dehydrogenase	C	Energy production and conversion ;
CAFS_HM_T_00016252	--	--	--
CAFS_HM_T_00042004	Acyl-CoA synthetase (AMP-forming)/AMP-acid ligase II	IQ	Lipid transport and metabolism ; Secondary metabolites biosynthesis, transport and catabolism ;
CAFS_HM_T_00090643	--	--	--
CAFS_HM_T_00034403	Predicted flavoprotein CzcO associated with the cation diffusion facilitator CzcD	P	Inorganic ion transport and metabolism ;
CAFS_HM_T_00078136	--	--	--
CAFS_HM_T_00084314	Triosephosphate isomerase	G	Carbohydrate transport and metabolism ;
CAFS_HM_T_00018279	NADH dehydrogenase/NADH:ubiquinone oxidoreductase 75 kD subunit (chain G)	C	Energy production and conversion ;
CAFS_HM_T_00069897	--	--	--
CAFS_HM_T_00076336	Translation elongation factor EF-G, a GTPase	J	Translation, ribosomal structure and biogenesis ;
CAFS_HM_T_00026326	--	--	--
CAFS_HM_T_00072318	Cytochrome P450	QV	Secondary metabolites biosynthesis, transport and catabolism ; Defense mechanisms ;
CAFS_HM_T_00065374	Predicted NTPase, NACHT family domain	T	Signal transduction mechanisms ;
CAFS_HM_T_00019377	Urocanate hydratase	E	Amino acid transport and metabolism ;
CAFS_HM_T_00009337	Acetolactate synthase large subunit or other thiamine pyrophosphate-requiring enzyme	EH	Amino acid transport and metabolism ; Coenzyme transport and metabolism ;
CAFS_HM_T_00064350	Malate/lactate dehydrogenase	C	Energy production and conversion ;
CAFS_HM_T_00080753	--	--	--
CAFS_HM_T_00016361	--	--	--
CAFS_HM_T_00018973	Archaeal aspartate aminotransferase or a related aminotransferase, includes purine catabolism protein PucG	EF	Amino acid transport and metabolism ; Nucleotide transport and metabolism ;
CAFS_HM_T_00085985	Sulfite reductase, alpha subunit (flavoprotein)	P	Inorganic ion transport and metabolism ;
CAFS_HM_T_00045889	Pyruvate carboxylase	C	Energy production and conversion ;
CAFS_HM_T_00021153	Tetratricopeptide (TPR) repeat	R	General function prediction only ;
CAFS_HM_T_00071627	Lactate dehydrogenase or related 2-hydroxyacid dehydrogenase	CHR	Energy production and conversion ; Coenzyme transport and metabolism ; General function prediction only ;
CAFS_HM_T_00071994	Uncharacterized conserved protein YfaS, alpha-2-macroglobulin family	R	General function prediction only ;
CAFS_HM_T_00024296	Endonuclease YncB, thermonuclease family	L	Replication, recombination and repair ;
CAFS_HM_T_00054151	--	--	--
CAFS_HM_T_00081042	--	--	--
CAFS_HM_T_00053808	Aminopeptidase N	E	Amino acid transport and metabolism ;
CAFS_HM_T_00037188	Zn-dependent alcohol dehydrogenase	R	General function prediction only ;
CAFS_HM_T_00050564	--	--	--
CAFS_HM_T_00011045	Predicted dehydrogenase	R	General function prediction only ;
CAFS_HM_T_00071811	--	--	--
CAFS_HM_T_00073543	--	--	--
CAFS_HM_T_00082643	DNA-binding beta-propeller fold protein YncE	R	General function prediction only ;
CAFS_HM_T_00053257	Autotransporter adhesin	UW	Intracellular trafficking, secretion, and vesicular transport ; Extracellular structures ;
CAFS_HM_T_00024851	Secreted trypsin-like serine protease	O	Posttranslational modification, protein turnover, chaperones ;
CAFS_HM_T_00043863	Aconitase A	C	Energy production and conversion ;
CAFS_HM_T_00043112	Fumarate hydratase class II	C	Energy production and conversion ;
CAFS_HM_T_00063233	Glucose-6-phosphate isomerase	G	Carbohydrate transport and metabolism ;
CAFS_HM_T_00024458	Glycosyltransferase involved in cell wall bisynthesis	M	Cell wall/membrane/envelope biogenesis ;
CAFS_HM_T_00025682	Chaperonin GroEL (HSP60 family)	O	Posttranslational modification, protein turnover, chaperones ;
CAFS_HM_T_00078102	WD40 repeat	R	General function prediction only ;
CAFS_HM_T_00050263	NAD(P)-dependent dehydrogenase, short-chain alcohol dehydrogenase family	IQR	Lipid transport and metabolism ; Secondary metabolites biosynthesis, transport and catabolism ; General function prediction only ;
CAFS_HM_T_00004622	Malate/lactate dehydrogenase	C	Energy production and conversion ;
CAFS_HM_T_00023279	S-adenosylmethionine synthetase	H	Coenzyme transport and metabolism ;
CAFS_HM_T_00090821	Xanthine dehydrogenase, molybdopterin-binding subunit B	F	Nucleotide transport and metabolism ;
CAFS_HM_T_00008117	Glycerol-3-phosphate dehydrogenase	C	Energy production and conversion ;
CAFS_HM_T_00073250	Acetyl/propionyl-CoA carboxylase, alpha subunit	I	Lipid transport and metabolism ;
CAFS_HM_T_00021106	Glutamate dehydrogenase/leucine dehydrogenase	E	Amino acid transport and metabolism ;
CAFS_HM_T_00082667	Acyl-CoA reductase or other NAD-dependent aldehyde dehydrogenase	C	Energy production and conversion ;
CAFS_HM_T_00000561	--	--	--
CAFS_HM_T_00051706	Pyruvate carboxylase	C	Energy production and conversion ;
CAFS_HM_T_00066554	Predicted NTPase, NACHT family domain	T	Signal transduction mechanisms ;
CAFS_HM_T_00073577	--	--	--
CAFS_HM_T_00019974	Glycine/serine hydroxymethyltransferase	E	Amino acid transport and metabolism ;
CAFS_HM_T_00048411	Acyl-CoA dehydrogenase related to the alkylation response protein AidB	I	Lipid transport and metabolism ;
CAFS_HM_T_00040353	Predicted amidohydrolase	R	General function prediction only ;
CAFS_HM_T_00045080	Threonine dehydrogenase or related Zn-dependent dehydrogenase	ER	Amino acid transport and metabolism ; General function prediction only ;
CAFS_HM_T_00079514	--	--	--
CAFS_HM_T_00038791	--	--	--
CAFS_HM_T_00058095	Outer membrane protein assembly factor BamB, contains PQQ-like beta-propeller repeat	M	Cell wall/membrane/envelope biogenesis ;
CAFS_HM_T_00036429	Ca2+-binding protein, EF-hand superfamily	T	Signal transduction mechanisms ;
CAFS_HM_T_00071147	Magnesium-transporting ATPase (P-type)	P	Inorganic ion transport and metabolism ;
CAFS_HM_T_00023031	16S rRNA U516 pseudouridylate synthase RsuA and related 23S rRNA U2605, pseudouridylate synthases	J	Translation, ribosomal structure and biogenesis ;
CAFS_HM_T_00084162	Acetolactate synthase large subunit or other thiamine pyrophosphate-requiring enzyme	EH	Amino acid transport and metabolism ; Coenzyme transport and metabolism ;
CAFS_HM_T_00001863	Uncharacterized conserved protein YfaS, alpha-2-macroglobulin family	R	General function prediction only ;
CAFS_HM_T_00006831	3-hydroxy-3-methylglutaryl CoA synthase	I	Lipid transport and metabolism ;
CAFS_HM_T_00048658	Uncharacterized conserved protein YukE	S	Function unknown ;
CAFS_HM_T_00058384	Acyl-CoA reductase or other NAD-dependent aldehyde dehydrogenase	C	Energy production and conversion ;
CAFS_HM_T_00079515	--	--	--
CAFS_HM_T_00037464	--	--	--
CAFS_HM_T_00068438	Acetyl-CoA carboxylase, carboxyltransferase component	I	Lipid transport and metabolism ;
CAFS_HM_T_00057653	--	--	--
CAFS_HM_T_00054411	Isoleucyl-tRNA synthetase	J	Translation, ribosomal structure and biogenesis ;
CAFS_HM_T_00016847	Pyruvate/2-oxoglutarate dehydrogenase complex, dihydrolipoamide dehydrogenase (E3) component or related enzyme	C	Energy production and conversion ;
CAFS_HM_T_00023593	Secreted protein containing bacterial Ig-like domain and vWFA domain	R	General function prediction only ;
CAFS_HM_T_00089108	--	--	--
CAFS_HM_T_00083381	Dihydroorotase or related cyclic amidohydrolase	F	Nucleotide transport and metabolism ;
CAFS_HM_T_00091832	ATP sulfurylase (sulfate adenylyltransferase)	P	Inorganic ion transport and metabolism ;
CAFS_HM_T_00066674	Predicted NTPase, NACHT family domain	T	Signal transduction mechanisms ;
CAFS_HM_T_00054471	6-phosphofructokinase	G	Carbohydrate transport and metabolism ;
CAFS_HM_T_00069939	ATP-dependent 26S proteasome regulatory subunit	O	Posttranslational modification, protein turnover, chaperones ;
CAFS_HM_T_00073187	Arylsulfatase A or related enzyme	P	Inorganic ion transport and metabolism ;
CAFS_HM_T_00047991	Uncharacterized membrane protein YhgE, phage infection protein (PIP) family	S	Function unknown ;
CAFS_HM_T_00061163	Chaperonin GroEL (HSP60 family)	O	Posttranslational modification, protein turnover, chaperones ;
CAFS_HM_T_00061077	Acetyl-CoA acetyltransferase	I	Lipid transport and metabolism ;
CAFS_HM_T_00063958	Actin-related protein	Z	Cytoskeleton ;
CAFS_HM_T_00059705	Archaeal/vacuolar-type H+-ATPase catalytic subunit A/Vma1	C	Energy production and conversion ;
CAFS_HM_T_00003217	2-oxoglutarate dehydrogenase complex, dehydrogenase (E1) component, and related enzymes	C	Energy production and conversion ;
CAFS_HM_T_00007376	Chaperonin GroEL (HSP60 family)	O	Posttranslational modification, protein turnover, chaperones ;
CAFS_HM_T_00016137	Leucyl aminopeptidase	E	Amino acid transport and metabolism ;
CAFS_HM_T_00041092	--	--	--
CAFS_HM_T_00035230	Predicted NTPase, NACHT family domain	T	Signal transduction mechanisms ;
CAFS_HM_T_00037959	--	--	--
CAFS_HM_T_00043029	Methionine synthase I, cobalamin-binding domain	E	Amino acid transport and metabolism ;
CAFS_HM_T_00058811	Glucose-6-phosphate 1-dehydrogenase	G	Carbohydrate transport and metabolism ;
CAFS_HM_T_00035464	Ferredoxin-like protein FixX	C	Energy production and conversion ;
CAFS_HM_T_00009918	Aspartate/tyrosine/aromatic aminotransferase	E	Amino acid transport and metabolism ;
CAFS_HM_T_00011001	--	--	--
CAFS_HM_T_00090703	--	--	--
CAFS_HM_T_00054819	Secreted protein containing bacterial Ig-like domain and vWFA domain	R	General function prediction only ;
CAFS_HM_T_00087431	Molecular chaperone DnaK (HSP70)	O	Posttranslational modification, protein turnover, chaperones ;
CAFS_HM_T_00091656	Uncharacterized conserved protein, related to short-chain dehydrogenases	S	Function unknown ;
CAFS_HM_T_00075276	Archaeal aspartate aminotransferase or a related aminotransferase, includes purine catabolism protein PucG	EF	Amino acid transport and metabolism ; Nucleotide transport and metabolism ;
CAFS_HM_T_00038325	NAD(P)-dependent dehydrogenase, short-chain alcohol dehydrogenase family	IQR	Lipid transport and metabolism ; Secondary metabolites biosynthesis, transport and catabolism ; General function prediction only ;
CAFS_HM_T_00060807	Asparagine synthetase B (glutamine-hydrolyzing)	E	Amino acid transport and metabolism ;
CAFS_HM_T_00032556	Alkyl hydroperoxide reductase subunit AhpC (peroxiredoxin)	V	Defense mechanisms ;
CAFS_HM_T_00063415	Acyl-CoA synthetase (AMP-forming)/AMP-acid ligase II	IQ	Lipid transport and metabolism ; Secondary metabolites biosynthesis, transport and catabolism ;
CAFS_HM_T_00018469	Chromosome segregation ATPase	D	Cell cycle control, cell division, chromosome partitioning ;
CAFS_HM_T_00066767	Alpha-glucosidase, glycosyl hydrolase family GH31	G	Carbohydrate transport and metabolism ;
CAFS_HM_T_00077079	Acyl-CoA reductase or other NAD-dependent aldehyde dehydrogenase	C	Energy production and conversion ;
CAFS_HM_T_00063535	Pyruvate/2-oxoglutarate dehydrogenase complex, dihydrolipoamide dehydrogenase (E3) component or related enzyme	C	Energy production and conversion ;
CAFS_HM_T_00018776	Acyl-CoA dehydrogenase related to the alkylation response protein AidB	I	Lipid transport and metabolism ;
CAFS_HM_T_00004909	--	--	--
CAFS_HM_T_00020983	--	--	--
CAFS_HM_T_00067933	Archaeal/vacuolar-type H+-ATPase catalytic subunit A/Vma1	C	Energy production and conversion ;
CAFS_HM_T_00090964	FMN-dependent dehydrogenase, includes L-lactate dehydrogenase and type II isopentenyl diphosphate isomerase	CIR	Energy production and conversion ; Lipid transport and metabolism ; General function prediction only ;
CAFS_HM_T_00072413	--	--	--
CAFS_HM_T_00071325	--	--	--
CAFS_HM_T_00058233	6-phosphogluconate dehydrogenase	G	Carbohydrate transport and metabolism ;
CAFS_HM_T_00066340	Uncharacterized conserved protein YfaS, alpha-2-macroglobulin family	R	General function prediction only ;
CAFS_HM_T_00069920	Uncharacterized conserved protein YfaS, alpha-2-macroglobulin family	R	General function prediction only ;
CAFS_HM_T_00025324	Aminopeptidase N	E	Amino acid transport and metabolism ;
CAFS_HM_T_00075094	NADPH:quinone reductase or related Zn-dependent oxidoreductase	CR	Energy production and conversion ; General function prediction only ;
CAFS_HM_T_00036291	--	--	--
CAFS_HM_T_00014583	--	--	--
CAFS_HM_T_00053251	Autotransporter adhesin	UW	Intracellular trafficking, secretion, and vesicular transport ; Extracellular structures ;
CAFS_HM_T_00078424	NAD(P)-dependent dehydrogenase, short-chain alcohol dehydrogenase family	IQR	Lipid transport and metabolism ; Secondary metabolites biosynthesis, transport and catabolism ; General function prediction only ;
CAFS_HM_T_00054004	Zn-dependent oligopeptidase	E	Amino acid transport and metabolism ;
CAFS_HM_T_00082455	--	--	--
CAFS_HM_T_00026431	--	--	--
CAFS_HM_T_00013870	Uncharacterized membrane protein YqiK, contains Band7/PHB/SPFH domain	S	Function unknown ;
CAFS_HM_T_00081769	--	--	--
CAFS_HM_T_00080541	Squalene cyclase	I	Lipid transport and metabolism ;
CAFS_HM_T_00006701	Multicopper oxidase with three cupredoxin domains (includes cell division protein FtsP and spore coat protein CotA)	DPM	Cell cycle control, cell division, chromosome partitioning ; Inorganic ion transport and metabolism ; Cell wall/membrane/envelope biogenesis ;
CAFS_HM_T_00011742	Tetratricopeptide (TPR) repeat	R	General function prediction only ;
CAFS_HM_T_00041962	--	--	--
CAFS_HM_T_00071732	UDP-glucose 6-dehydrogenase	M	Cell wall/membrane/envelope biogenesis ;
CAFS_HM_T_00035633	Alpha-glucosidase, glycosyl hydrolase family GH31	G	Carbohydrate transport and metabolism ;
CAFS_HM_T_00090227	UDP-N-acetylglucosamine pyrophosphorylase	G	Carbohydrate transport and metabolism ;
CAFS_HM_T_00004034	Uncharacterized conserved protein YfaS, alpha-2-macroglobulin family	R	General function prediction only ;
CAFS_HM_T_00026363	Aldo/keto reductase, related to diketogulonate reductase	Q	Secondary metabolites biosynthesis, transport and catabolism ;
CAFS_HM_T_00088582	Cytochrome P450	QV	Secondary metabolites biosynthesis, transport and catabolism ; Defense mechanisms ;
CAFS_HM_T_00048160	--	--	--
CAFS_HM_T_00022081	Sugar lactone lactonase YvrE	G	Carbohydrate transport and metabolism ;
CAFS_HM_T_00046858	Beta-glucosidase/6-phospho-beta-glucosidase/beta-galactosidase	G	Carbohydrate transport and metabolism ;
CAFS_HM_T_00018915	--	--	--
CAFS_HM_T_00035662	Zn-dependent alcohol dehydrogenase	R	General function prediction only ;
CAFS_HM_T_00037718	--	--	--
CAFS_HM_T_00008224	Uncharacterized conserved protein YfaS, alpha-2-macroglobulin family	R	General function prediction only ;
CAFS_HM_T_00070234	Magnesium-transporting ATPase (P-type)	P	Inorganic ion transport and metabolism ;
CAFS_HM_T_00077283	--	--	--
CAFS_HM_T_00003584	RNA recognition motif (RRM) domain	J	Translation, ribosomal structure and biogenesis ;
CAFS_HM_T_00071402	UDP-N-acetylglucosamine 2-epimerase	M	Cell wall/membrane/envelope biogenesis ;
CAFS_HM_T_00023205	Protein-arginine kinase	O	Posttranslational modification, protein turnover, chaperones ;
CAFS_HM_T_00067549	--	--	--
CAFS_HM_T_00055568	--	--	--
CAFS_HM_T_00051299	NAD(P)-dependent dehydrogenase, short-chain alcohol dehydrogenase family	IQR	Lipid transport and metabolism ; Secondary metabolites biosynthesis, transport and catabolism ; General function prediction only ;
CAFS_HM_T_00039323	Glucosamine 6-phosphate synthetase, contains amidotransferase and phosphosugar isomerase domains	M	Cell wall/membrane/envelope biogenesis ;
CAFS_HM_T_00003795	Predicted NTPase, NACHT family domain	T	Signal transduction mechanisms ;
CAFS_HM_T_00081090	Monoamine oxidase	E	Amino acid transport and metabolism ;
CAFS_HM_T_00032217	Phosphoribosylformylglycinamidine (FGAM) synthase, glutamine amidotransferase domain	F	Nucleotide transport and metabolism ;
CAFS_HM_T_00001225	Uncharacterized conserved protein YfaS, alpha-2-macroglobulin family	R	General function prediction only ;
CAFS_HM_T_00022238	Aspartate/tyrosine/aromatic aminotransferase	E	Amino acid transport and metabolism ;
CAFS_HM_T_00036966	--	--	--
CAFS_HM_T_00085463	--	--	--
CAFS_HM_T_00071321	Negative regulator of GroEL, contains thioredoxin-like and TPR-like domains	O	Posttranslational modification, protein turnover, chaperones ;
CAFS_HM_T_00086662	Tetratricopeptide (TPR) repeat	R	General function prediction only ;
CAFS_HM_T_00051687	--	--	--
CAFS_HM_T_00086333	1,4-alpha-glucan branching enzyme	G	Carbohydrate transport and metabolism ;
CAFS_HM_T_00046698	L-alanine-DL-glutamate epimerase or related enzyme of enolase superfamily	MR	Cell wall/membrane/envelope biogenesis ; General function prediction only ;
CAFS_HM_T_00077616	Acyl-CoA dehydrogenase related to the alkylation response protein AidB	I	Lipid transport and metabolism ;
CAFS_HM_T_00051394	--	--	--
CAFS_HM_T_00061073	Glycyl-tRNA synthetase (class II)	J	Translation, ribosomal structure and biogenesis ;
CAFS_HM_T_00041756	Galactokinase	G	Carbohydrate transport and metabolism ;
CAFS_HM_T_00018690	--	--	--
CAFS_HM_T_00015397	--	--	--
CAFS_HM_T_00080910	Tetratricopeptide (TPR) repeat	R	General function prediction only ;
CAFS_HM_T_00030006	Glutathione S-transferase	O	Posttranslational modification, protein turnover, chaperones ;
CAFS_HM_T_00082983	Chaperonin GroEL (HSP60 family)	O	Posttranslational modification, protein turnover, chaperones ;
CAFS_HM_T_00051134	Molecular chaperone DnaK (HSP70)	O	Posttranslational modification, protein turnover, chaperones ;
CAFS_HM_T_00084406	Valyl-tRNA synthetase	J	Translation, ribosomal structure and biogenesis ;
CAFS_HM_T_00050542	NAD(P)-dependent dehydrogenase, short-chain alcohol dehydrogenase family	IQR	Lipid transport and metabolism ; Secondary metabolites biosynthesis, transport and catabolism ; General function prediction only ;
CAFS_HM_T_00075125	--	--	--
CAFS_HM_T_00076524	Zn-dependent peptidase, M16 (insulinase) family	O	Posttranslational modification, protein turnover, chaperones ;
CAFS_HM_T_00015583	--	--	--
CAFS_HM_T_00053449	Acyl-CoA dehydrogenase related to the alkylation response protein AidB	I	Lipid transport and metabolism ;
CAFS_HM_T_00003702	Acyl-CoA synthetase (AMP-forming)/AMP-acid ligase II	IQ	Lipid transport and metabolism ; Secondary metabolites biosynthesis, transport and catabolism ;
CAFS_HM_T_00018002	--	--	--
CAFS_HM_T_00014168	7-keto-8-aminopelargonate synthetase or related enzyme	H	Coenzyme transport and metabolism ;
CAFS_HM_T_00055664	--	--	--
CAFS_HM_T_00008540	RNA recognition motif (RRM) domain	J	Translation, ribosomal structure and biogenesis ;
CAFS_HM_T_00073412	Phosphoribosylamine-glycine ligase	F	Nucleotide transport and metabolism ;
CAFS_HM_T_00022742	Glutathione S-transferase	O	Posttranslational modification, protein turnover, chaperones ;
CAFS_HM_T_00078422	NAD(P)-dependent dehydrogenase, short-chain alcohol dehydrogenase family	IQR	Lipid transport and metabolism ; Secondary metabolites biosynthesis, transport and catabolism ; General function prediction only ;
CAFS_HM_T_00056473	Enolase	G	Carbohydrate transport and metabolism ;
CAFS_HM_T_00045886	Pyruvate carboxylase	C	Energy production and conversion ;
CAFS_HM_T_00015013	--	--	--
CAFS_HM_T_00081432	CBS domain	T	Signal transduction mechanisms ;
CAFS_HM_T_00023582	Secreted protein containing bacterial Ig-like domain and vWFA domain	R	General function prediction only ;
CAFS_HM_T_00089103	--	--	--
CAFS_HM_T_00041894	Gamma-glutamyl phosphate reductase	E	Amino acid transport and metabolism ;
CAFS_HM_T_00038994	4-hydroxyphenylpyruvate dioxygenase and related hemolysins	ER	Amino acid transport and metabolism ; General function prediction only ;
CAFS_HM_T_00064882	N-acetyl-beta-hexosaminidase	G	Carbohydrate transport and metabolism ;
CAFS_HM_T_00068065	--	--	--
CAFS_HM_T_00010935	N-Dimethylarginine dimethylaminohydrolase	E	Amino acid transport and metabolism ;
CAFS_HM_T_00021305	2-polyprenyl-6-methoxyphenol hydroxylase and related FAD-dependent oxidoreductases	HC	Coenzyme transport and metabolism ; Energy production and conversion ;
CAFS_HM_T_00031229	Acetyl-CoA acetyltransferase	I	Lipid transport and metabolism ;
CAFS_HM_T_00025242	Thymidine phosphorylase	F	Nucleotide transport and metabolism ;
CAFS_HM_T_00065410	Superfamily II DNA and RNA helicase	L	Replication, recombination and repair ;
CAFS_HM_T_00002728	Serine protease, subtilisin family	O	Posttranslational modification, protein turnover, chaperones ;
CAFS_HM_T_00069763	--	--	--
CAFS_HM_T_00049726	Acyl-CoA reductase or other NAD-dependent aldehyde dehydrogenase	C	Energy production and conversion ;
CAFS_HM_T_00035535	Malate synthase	C	Energy production and conversion ;
CAFS_HM_T_00044401	Autotransporter adhesin	UW	Intracellular trafficking, secretion, and vesicular transport ; Extracellular structures ;
CAFS_HM_T_00049606	Arginyl-tRNA synthetase	J	Translation, ribosomal structure and biogenesis ;
CAFS_HM_T_00065550	NADPH-dependent 2,4-dienoyl-CoA reductase, sulfur reductase, or a related oxidoreductase	I	Lipid transport and metabolism ;
CAFS_HM_T_00047028	ATP-dependent 26S proteasome regulatory subunit	O	Posttranslational modification, protein turnover, chaperones ;
CAFS_HM_T_00040831	Glutamyl- or glutaminyl-tRNA synthetase	J	Translation, ribosomal structure and biogenesis ;
CAFS_HM_T_00091702	--	--	--
CAFS_HM_T_00050332	NAD/NADP transhydrogenase alpha subunit	C	Energy production and conversion ;
CAFS_HM_T_00066061	Threonyl-tRNA synthetase	J	Translation, ribosomal structure and biogenesis ;
CAFS_HM_T_00058446	Chaperonin GroEL (HSP60 family)	O	Posttranslational modification, protein turnover, chaperones ;
CAFS_HM_T_00036819	Uncharacterized protein, contains caspase domain	R	General function prediction only ;
CAFS_HM_T_00013840	Translation elongation factor EF-G, a GTPase	J	Translation, ribosomal structure and biogenesis ;
CAFS_HM_T_00016669	Chromosome segregation ATPase	D	Cell cycle control, cell division, chromosome partitioning ;
CAFS_HM_T_00052667	--	--	--
CAFS_HM_T_00077286	--	--	--
CAFS_HM_T_00045250	Superfamily II DNA and RNA helicase	L	Replication, recombination and repair ;
CAFS_HM_T_00006719	ABC-type Zn2+ transport system, periplasmic component/surface adhesin	P	Inorganic ion transport and metabolism ;
CAFS_HM_T_00024819	N-Dimethylarginine dimethylaminohydrolase	E	Amino acid transport and metabolism ;
CAFS_HM_T_00023239	--	--	--
CAFS_HM_T_00026362	ATP-dependent 26S proteasome regulatory subunit	O	Posttranslational modification, protein turnover, chaperones ;
CAFS_HM_T_00027820	Autotransporter adhesin	UW	Intracellular trafficking, secretion, and vesicular transport ; Extracellular structures ;
CAFS_HM_T_00019251	Cystathionine beta-lyase/cystathionine gamma-synthase	E	Amino acid transport and metabolism ;
CAFS_HM_T_00034703	Molecular chaperone DnaK (HSP70)	O	Posttranslational modification, protein turnover, chaperones ;
CAFS_HM_T_00007395	Cu/Zn superoxide dismutase	P	Inorganic ion transport and metabolism ;
CAFS_HM_T_00057018	Shikimate kinase	E	Amino acid transport and metabolism ;
CAFS_HM_T_00076176	Zn-dependent peptidase, M16 (insulinase) family	O	Posttranslational modification, protein turnover, chaperones ;
CAFS_HM_T_00039858	Magnesium-transporting ATPase (P-type)	P	Inorganic ion transport and metabolism ;
CAFS_HM_T_00068323	Translation elongation factor EF-G, a GTPase	J	Translation, ribosomal structure and biogenesis ;
CAFS_HM_T_00009980	Ribosomal protein L4	J	Translation, ribosomal structure and biogenesis ;
CAFS_HM_T_00065127	Carotenoid cleavage dioxygenase or a related enzyme	Q	Secondary metabolites biosynthesis, transport and catabolism ;
CAFS_HM_T_00091706	Signal recognition particle GTPase	U	Intracellular trafficking, secretion, and vesicular transport ;
CAFS_HM_T_00027947	--	--	--
CAFS_HM_T_00018749	Type V secretory pathway, adhesin AidA	MU	Cell wall/membrane/envelope biogenesis ; Intracellular trafficking, secretion, and vesicular transport ;
CAFS_HM_T_00049374	Chaperonin GroEL (HSP60 family)	O	Posttranslational modification, protein turnover, chaperones ;
CAFS_HM_T_00079334	Negative regulator of GroEL, contains thioredoxin-like and TPR-like domains	O	Posttranslational modification, protein turnover, chaperones ;
CAFS_HM_T_00003570	--	--	--
CAFS_HM_T_00060445	DnaJ-class molecular chaperone with C-terminal Zn finger domain	O	Posttranslational modification, protein turnover, chaperones ;
CAFS_HM_T_00040530	--	--	--
CAFS_HM_T_00070051	Chaperonin GroEL (HSP60 family)	O	Posttranslational modification, protein turnover, chaperones ;
CAFS_HM_T_00044195	Predicted Zn-dependent peptidase	R	General function prediction only ;
CAFS_HM_T_00059356	Aspartyl/asparaginyl-tRNA synthetase	J	Translation, ribosomal structure and biogenesis ;
CAFS_HM_T_00034007	Phosphoribosylaminoimidazole-succinocarboxamide synthase	F	Nucleotide transport and metabolism ;
CAFS_HM_T_00030642	Acetylornithine deacetylase/Succinyl-diaminopimelate desuccinylase or related deacylase	E	Amino acid transport and metabolism ;
CAFS_HM_T_00008334	Pyruvate/2-oxoglutarate/acetoin dehydrogenase complex, dehydrogenase (E1) component	C	Energy production and conversion ;
CAFS_HM_T_00032302	TPR repeat	T	Signal transduction mechanisms ;
CAFS_HM_T_00064928	--	--	--
CAFS_HM_T_00016367	Serine/threonine protein kinase	T	Signal transduction mechanisms ;
CAFS_HM_T_00056411	--	--	--
CAFS_HM_T_00024634	Deoxyribose-phosphate aldolase	F	Nucleotide transport and metabolism ;
CAFS_HM_T_00066849	Threonine synthase	E	Amino acid transport and metabolism ;
CAFS_HM_T_00026185	--	--	--
CAFS_HM_T_00070491	3-hydroxyacyl-CoA dehydrogenase	I	Lipid transport and metabolism ;
CAFS_HM_T_00031049	Molecular chaperone, HSP90 family	O	Posttranslational modification, protein turnover, chaperones ;
CAFS_HM_T_00018258	Aspartyl aminopeptidase	E	Amino acid transport and metabolism ;
CAFS_HM_T_00045900	Chaperonin GroEL (HSP60 family)	O	Posttranslational modification, protein turnover, chaperones ;
CAFS_HM_T_00048449	Dihydroxyacetone kinase	G	Carbohydrate transport and metabolism ;
CAFS_HM_T_00022405	Pimeloyl-ACP methyl ester carboxylesterase	HR	Coenzyme transport and metabolism ; General function prediction only ;
CAFS_HM_T_00062457	Ferredoxin-NADP reductase	C	Energy production and conversion ;
CAFS_HM_T_00009213	Acyl-CoA dehydrogenase related to the alkylation response protein AidB	I	Lipid transport and metabolism ;
CAFS_HM_T_00052592	Uncharacterized protein, contains caspase domain	R	General function prediction only ;
CAFS_HM_T_00064181	--	--	--
CAFS_HM_T_00081013	--	--	--
CAFS_HM_T_00090706	Uncharacterized conserved protein YcbX, contains MOSC and Fe-S domains	R	General function prediction only ;
CAFS_HM_T_00014281	2-keto-4-pentenoate hydratase/2-oxohepta-3-ene-1,7-dioic acid hydratase (catechol pathway)	Q	Secondary metabolites biosynthesis, transport and catabolism ;
CAFS_HM_T_00027633	Enamine deaminase RidA, house cleaning of reactive enamine intermediates, YjgF/YER057c/UK114 family	V	Defense mechanisms ;
CAFS_HM_T_00038065	Serine protease inhibitor	O	Posttranslational modification, protein turnover, chaperones ;
CAFS_HM_T_00032587	ATP-dependent 26S proteasome regulatory subunit	O	Posttranslational modification, protein turnover, chaperones ;
CAFS_HM_T_00027074	Acyl-CoA reductase or other NAD-dependent aldehyde dehydrogenase	C	Energy production and conversion ;
CAFS_HM_T_00082302	Uncharacterized conserved protein YfaS, alpha-2-macroglobulin family	R	General function prediction only ;
CAFS_HM_T_00045362	NADPH-dependent curcumin reductase CurA	QR	Secondary metabolites biosynthesis, transport and catabolism ; General function prediction only ;
CAFS_HM_T_00076880	Cytochrome P450	QV	Secondary metabolites biosynthesis, transport and catabolism ; Defense mechanisms ;
CAFS_HM_T_00017862	--	--	--
CAFS_HM_T_00012722	--	--	--
CAFS_HM_T_00055699	Uricase (urate oxidase)	Q	Secondary metabolites biosynthesis, transport and catabolism ;
CAFS_HM_T_00021376	Uncharacterized surface anchored protein	S	Function unknown ;
CAFS_HM_T_00082978	--	--	--
CAFS_HM_T_00086550	Predicted NTPase, NACHT family domain	T	Signal transduction mechanisms ;
CAFS_HM_T_00048935	Aspartyl/asparaginyl beta-hydroxylase, cupin superfamily	O	Posttranslational modification, protein turnover, chaperones ;
CAFS_HM_T_00075979	--	--	--
CAFS_HM_T_00062388	Cytochrome P450	QV	Secondary metabolites biosynthesis, transport and catabolism ; Defense mechanisms ;
CAFS_HM_T_00091719	ATP-dependent 26S proteasome regulatory subunit	O	Posttranslational modification, protein turnover, chaperones ;
CAFS_HM_T_00033535	Negative regulator of GroEL, contains thioredoxin-like and TPR-like domains	O	Posttranslational modification, protein turnover, chaperones ;
CAFS_HM_T_00051670	Secreted trypsin-like serine protease	O	Posttranslational modification, protein turnover, chaperones ;
CAFS_HM_T_00080171	--	--	--
CAFS_HM_T_00038746	Glutathione S-transferase	O	Posttranslational modification, protein turnover, chaperones ;
CAFS_HM_T_00010215	--	--	--
CAFS_HM_T_00045863	WD40 repeat	R	General function prediction only ;
CAFS_HM_T_00031942	--	--	--
CAFS_HM_T_00067645	Magnesium-transporting ATPase (P-type)	P	Inorganic ion transport and metabolism ;
CAFS_HM_T_00042409	Citrate synthase	C	Energy production and conversion ;
CAFS_HM_T_00027817	Acyl-CoA dehydrogenase related to the alkylation response protein AidB	I	Lipid transport and metabolism ;
CAFS_HM_T_00017811	Leucyl aminopeptidase	E	Amino acid transport and metabolism ;
CAFS_HM_T_00018151	Kynureninase	E	Amino acid transport and metabolism ;
CAFS_HM_T_00077598	Acetyl-CoA carboxylase, carboxyltransferase component	I	Lipid transport and metabolism ;
CAFS_HM_T_00012213	Mevalonate pyrophosphate decarboxylase	I	Lipid transport and metabolism ;
CAFS_HM_T_00071018	--	--	--
CAFS_HM_T_00091137	Superfamily I DNA and/or RNA helicase	L	Replication, recombination and repair ;
CAFS_HM_T_00013675	Ribosomal protein L3	J	Translation, ribosomal structure and biogenesis ;
CAFS_HM_T_00020835	Inorganic pyrophosphatase	CP	Energy production and conversion ; Inorganic ion transport and metabolism ;
CAFS_HM_T_00088131	--	--	--
CAFS_HM_T_00070563	Alkyl hydroperoxide reductase subunit AhpC (peroxiredoxin)	V	Defense mechanisms ;
CAFS_HM_T_00090319	Isoleucyl-tRNA synthetase	J	Translation, ribosomal structure and biogenesis ;
CAFS_HM_T_00062812	Predicted kinase related to galactokinase and mevalonate kinase	R	General function prediction only ;
CAFS_HM_T_00045808	Cytochrome P450	QV	Secondary metabolites biosynthesis, transport and catabolism ; Defense mechanisms ;
CAFS_HM_T_00078073	--	--	--
CAFS_HM_T_00033486	Superfamily II DNA and RNA helicase	L	Replication, recombination and repair ;
CAFS_HM_T_00036935	--	--	--
CAFS_HM_T_00031348	Methylmalonyl-CoA mutase, C-terminal domain/subunit (cobalamin-binding)	I	Lipid transport and metabolism ;
CAFS_HM_T_00049109	--	--	--
CAFS_HM_T_00027584	Tryptophanyl-tRNA synthetase	J	Translation, ribosomal structure and biogenesis ;
CAFS_HM_T_00063417	Acyl-CoA synthetase (AMP-forming)/AMP-acid ligase II	IQ	Lipid transport and metabolism ; Secondary metabolites biosynthesis, transport and catabolism ;
CAFS_HM_T_00008623	Serine protease inhibitor	O	Posttranslational modification, protein turnover, chaperones ;
CAFS_HM_T_00001457	--	--	--
CAFS_HM_T_00014875	--	--	--
CAFS_HM_T_00082500	Uncharacterized membrane protein YqiK, contains Band7/PHB/SPFH domain	S	Function unknown ;
CAFS_HM_T_00067100	--	--	--
CAFS_HM_T_00028713	NADH:ubiquinone oxidoreductase, NADH-binding 51 kD subunit (chain F)	C	Energy production and conversion ;
CAFS_HM_T_00071403	Sialic acid synthase SpsE, contains C-terminal SAF domain	M	Cell wall/membrane/envelope biogenesis ;
CAFS_HM_T_00016782	--	--	--
CAFS_HM_T_00045056	Cysteinyl-tRNA synthetase	J	Translation, ribosomal structure and biogenesis ;
CAFS_HM_T_00008821	Predicted ATPase, AAA+ superfamily	R	General function prediction only ;
CAFS_HM_T_00000968	Alpha-glucosidase, glycosyl hydrolase family GH31	G	Carbohydrate transport and metabolism ;
CAFS_HM_T_00054150	Periplasmic DMSO/TMAO reductase YedYZ, molybdopterin-dependent catalytic subunit	C	Energy production and conversion ;
CAFS_HM_T_00014015	Autotransporter adhesin	UW	Intracellular trafficking, secretion, and vesicular transport ; Extracellular structures ;
CAFS_HM_T_00042530	ATP-dependent 26S proteasome regulatory subunit	O	Posttranslational modification, protein turnover, chaperones ;
CAFS_HM_T_00019321	--	--	--
CAFS_HM_T_00074845	Predicted metal-dependent hydrolase, phosphotriesterase family	R	General function prediction only ;
CAFS_HM_T_00031409	Secreted trypsin-like serine protease	O	Posttranslational modification, protein turnover, chaperones ;
CAFS_HM_T_00044466	NAD(P)-dependent dehydrogenase, short-chain alcohol dehydrogenase family	IQR	Lipid transport and metabolism ; Secondary metabolites biosynthesis, transport and catabolism ; General function prediction only ;
CAFS_HM_T_00014742	Translation elongation factor EF-Tu, a GTPase	J	Translation, ribosomal structure and biogenesis ;
CAFS_HM_T_00029107	RNA recognition motif (RRM) domain	J	Translation, ribosomal structure and biogenesis ;
CAFS_HM_T_00028216	Cytochrome P450	QV	Secondary metabolites biosynthesis, transport and catabolism ; Defense mechanisms ;
CAFS_HM_T_00008957	--	--	--
CAFS_HM_T_00052684	Aspartyl/asparaginyl-tRNA synthetase	J	Translation, ribosomal structure and biogenesis ;
CAFS_HM_T_00066681	tRNA Uridine 5-carbamoylmethylation protein Kti12 (Killer toxin insensitivity protein)	J	Translation, ribosomal structure and biogenesis ;
CAFS_HM_T_00031689	Chromosome segregation ATPase	D	Cell cycle control, cell division, chromosome partitioning ;
CAFS_HM_T_00038878	Glutathione S-transferase	O	Posttranslational modification, protein turnover, chaperones ;
CAFS_HM_T_00041635	--	--	--
CAFS_HM_T_00060914	Zn-dependent amino- or carboxypeptidase, M28 family	O	Posttranslational modification, protein turnover, chaperones ;
CAFS_HM_T_00037681	--	--	--
CAFS_HM_T_00069136	--	--	--
CAFS_HM_T_00047699	Glucan phosphorylase	G	Carbohydrate transport and metabolism ;
CAFS_HM_T_00043726	--	--	--
CAFS_HM_T_00046103	NADH:ubiquinone oxidoreductase 49 kD subunit (chain D)	C	Energy production and conversion ;
CAFS_HM_T_00001453	Transaldolase	G	Carbohydrate transport and metabolism ;
CAFS_HM_T_00067536	--	--	--
CAFS_HM_T_00037368	--	--	--
CAFS_HM_T_00050362	--	--	--
CAFS_HM_T_00015516	--	--	--
CAFS_HM_T_00084915	Secreted trypsin-like serine protease	O	Posttranslational modification, protein turnover, chaperones ;
CAFS_HM_T_00070626	--	--	--
CAFS_HM_T_00073685	Alpha-glucosidase, glycosyl hydrolase family GH31	G	Carbohydrate transport and metabolism ;
CAFS_HM_T_00086755	--	--	--
CAFS_HM_T_00068410	Uncharacterized membrane protein YqiK, contains Band7/PHB/SPFH domain	S	Function unknown ;
CAFS_HM_T_00061301	Acyl-CoA dehydrogenase related to the alkylation response protein AidB	I	Lipid transport and metabolism ;
CAFS_HM_T_00061797	Autotransporter translocation and assembly factor TamB	U	Intracellular trafficking, secretion, and vesicular transport ;
CAFS_HM_T_00055425	--	--	--
CAFS_HM_T_00062038	Electron transfer flavoprotein, alpha subunit	C	Energy production and conversion ;
CAFS_HM_T_00088929	Phenylalanyl-tRNA synthetase beta subunit	J	Translation, ribosomal structure and biogenesis ;
CAFS_HM_T_00052124	Glutathione S-transferase	O	Posttranslational modification, protein turnover, chaperones ;
CAFS_HM_T_00064658	Glutathione S-transferase	O	Posttranslational modification, protein turnover, chaperones ;
CAFS_HM_T_00063619	Protein-arginine kinase	O	Posttranslational modification, protein turnover, chaperones ;
CAFS_HM_T_00029377	ATPase components of ABC transporters with duplicated ATPase domains	R	General function prediction only ;
CAFS_HM_T_00038965	Glycine cleavage system T protein (aminomethyltransferase)	E	Amino acid transport and metabolism ;
CAFS_HM_T_00070681	Acyl-CoA synthetase (AMP-forming)/AMP-acid ligase II	IQ	Lipid transport and metabolism ; Secondary metabolites biosynthesis, transport and catabolism ;
CAFS_HM_T_00035492	NAD(P)-dependent dehydrogenase, short-chain alcohol dehydrogenase family	IQR	Lipid transport and metabolism ; Secondary metabolites biosynthesis, transport and catabolism ; General function prediction only ;
CAFS_HM_T_00091403	--	--	--
CAFS_HM_T_00013126	Phytoene dehydrogenase-related protein	Q	Secondary metabolites biosynthesis, transport and catabolism ;
CAFS_HM_T_00000528	--	--	--
CAFS_HM_T_00040871	ABC-type amino acid transport/signal transduction system, periplasmic component/domain	ET	Amino acid transport and metabolism ; Signal transduction mechanisms ;
CAFS_HM_T_00069036	Uncharacterized conserved protein, contains CHAT domain	S	Function unknown ;
CAFS_HM_T_00070772	--	--	--
CAFS_HM_T_00037855	Coproporphyrinogen III oxidase	H	Coenzyme transport and metabolism ;
CAFS_HM_T_00022179	Mannose-6-phosphate isomerase, cupin superfamily	G	Carbohydrate transport and metabolism ;
CAFS_HM_T_00005390	--	--	--
CAFS_HM_T_00022776	Enoyl-CoA hydratase/carnithine racemase	I	Lipid transport and metabolism ;
CAFS_HM_T_00057687	Seryl-tRNA synthetase	J	Translation, ribosomal structure and biogenesis ;
CAFS_HM_T_00044494	--	--	--
CAFS_HM_T_00068905	Alpha-mannosidase	G	Carbohydrate transport and metabolism ;
CAFS_HM_T_00021073	Hexokinase	G	Carbohydrate transport and metabolism ;
CAFS_HM_T_00069747	Purine nucleoside phosphorylase	F	Nucleotide transport and metabolism ;
CAFS_HM_T_00036669	Glutathione S-transferase	O	Posttranslational modification, protein turnover, chaperones ;
CAFS_HM_T_00090684	Glutathione S-transferase	O	Posttranslational modification, protein turnover, chaperones ;
CAFS_HM_T_00044065	N-methylhydantoinase B/oxoprolinase/acetone carboxylase, alpha subunit	EQ	Amino acid transport and metabolism ; Secondary metabolites biosynthesis, transport and catabolism ;
CAFS_HM_T_00029551	--	--	--
CAFS_HM_T_00053128	Secreted protein containing bacterial Ig-like domain and vWFA domain	R	General function prediction only ;
CAFS_HM_T_00052313	--	--	--
CAFS_HM_T_00047022	Secreted trypsin-like serine protease	O	Posttranslational modification, protein turnover, chaperones ;
CAFS_HM_T_00047753	5-formyltetrahydrofolate cyclo-ligase	H	Coenzyme transport and metabolism ;
CAFS_HM_T_00085288	--	--	--
CAFS_HM_T_00042104	ATP-dependent 26S proteasome regulatory subunit	O	Posttranslational modification, protein turnover, chaperones ;
CAFS_HM_T_00018125	Superfamily II DNA and RNA helicase	L	Replication, recombination and repair ;
CAFS_HM_T_00018783	--	--	--
CAFS_HM_T_00046804	Lysyl-tRNA synthetase (class II)	J	Translation, ribosomal structure and biogenesis ;
CAFS_HM_T_00043102	Tfp pilus assembly protein FimV	NW	Cell motility ; Extracellular structures ;
CAFS_HM_T_00032818	FKBP-type peptidyl-prolyl cis-trans isomerase	O	Posttranslational modification, protein turnover, chaperones ;
CAFS_HM_T_00089324	--	--	--
CAFS_HM_T_00016920	Predicted Zn-dependent peptidase	R	General function prediction only ;
CAFS_HM_T_00028202	Glutathione S-transferase	O	Posttranslational modification, protein turnover, chaperones ;
CAFS_HM_T_00010014	--	--	--
CAFS_HM_T_00081762	Uridine phosphorylase	F	Nucleotide transport and metabolism ;
CAFS_HM_T_00079405	Aspartyl/asparaginyl-tRNA synthetase	J	Translation, ribosomal structure and biogenesis ;
CAFS_HM_T_00029239	Asparagine synthetase B (glutamine-hydrolyzing)	E	Amino acid transport and metabolism ;
CAFS_HM_T_00077372	--	--	--
CAFS_HM_T_00073202	Ubiquinone/menaquinone biosynthesis C-methylase UbiE	H	Coenzyme transport and metabolism ;
CAFS_HM_T_00009810	Isocitrate dehydrogenase	C	Energy production and conversion ;
CAFS_HM_T_00090276	Archaeal/vacuolar-type H+-ATPase subunit B/Vma2	C	Energy production and conversion ;
CAFS_HM_T_00000966	Alpha-glucosidase, glycosyl hydrolase family GH31	G	Carbohydrate transport and metabolism ;
CAFS_HM_T_00049133	--	--	--
CAFS_HM_T_00006604	--	--	--
CAFS_HM_T_00065303	Cytosine/adenosine deaminase or related metal-dependent hydrolase	FR	Nucleotide transport and metabolism ; General function prediction only ;
CAFS_HM_T_00028114	--	--	--
CAFS_HM_T_00053290	Alpha-mannosidase	G	Carbohydrate transport and metabolism ;
CAFS_HM_T_00082850	2-hydroxychromene-2-carboxylate isomerase	Q	Secondary metabolites biosynthesis, transport and catabolism ;
CAFS_HM_T_00087448	--	--	--
CAFS_HM_T_00042609	Chromosome segregation ATPase	D	Cell cycle control, cell division, chromosome partitioning ;
CAFS_HM_T_00082604	--	--	--
CAFS_HM_T_00087268	Leucine-rich repeat (LRR) protein	K	Transcription ;
CAFS_HM_T_00069710	Ribosomal protein S3AE	J	Translation, ribosomal structure and biogenesis ;
CAFS_HM_T_00068756	--	--	--
CAFS_HM_T_00050545	RNA processing factor Prp31, contains Nop domain	J	Translation, ribosomal structure and biogenesis ;
CAFS_HM_T_00035121	--	--	--
CAFS_HM_T_00061238	--	--	--
CAFS_HM_T_00074186	Short-chain dehydrogenase	R	General function prediction only ;
CAFS_HM_T_00014129	--	--	--
CAFS_HM_T_00040840	--	--	--
CAFS_HM_T_00008159	--	--	--
CAFS_HM_T_00020108	ABC-type multidrug transport system, ATPase and permease component	V	Defense mechanisms ;
CAFS_HM_T_00037811	--	--	--
CAFS_HM_T_00064807	Biotin carboxylase	I	Lipid transport and metabolism ;
CAFS_HM_T_00016804	Hydroxypyruvate isomerase	G	Carbohydrate transport and metabolism ;
CAFS_HM_T_00015784	--	--	--
CAFS_HM_T_00028107	Nucleoside diphosphate kinase	F	Nucleotide transport and metabolism ;
CAFS_HM_T_00083467	--	--	--
CAFS_HM_T_00055832	Secreted protein containing bacterial Ig-like domain and vWFA domain	R	General function prediction only ;
CAFS_HM_T_00090739	L-asparaginase/archaeal Glu-tRNAGln amidotransferase subunit D	JU	Translation, ribosomal structure and biogenesis ; Intracellular trafficking, secretion, and vesicular transport ;
CAFS_HM_T_00005902	Chromosome segregation ATPase	D	Cell cycle control, cell division, chromosome partitioning ;
CAFS_HM_T_00034495	ATP-dependent 26S proteasome regulatory subunit	O	Posttranslational modification, protein turnover, chaperones ;
CAFS_HM_T_00072531	NAD(P)-dependent dehydrogenase, short-chain alcohol dehydrogenase family	IQR	Lipid transport and metabolism ; Secondary metabolites biosynthesis, transport and catabolism ; General function prediction only ;
CAFS_HM_T_00053755	GTPase SAR1 family domain	R	General function prediction only ;
CAFS_HM_T_00045017	--	--	--
CAFS_HM_T_00018993	Tetratricopeptide (TPR) repeat	R	General function prediction only ;
CAFS_HM_T_00008033	--	--	--
CAFS_HM_T_00069383	--	--	--
CAFS_HM_T_00076832	--	--	--
CAFS_HM_T_00048959	Short-chain dehydrogenase	R	General function prediction only ;
CAFS_HM_T_00036799	Histidyl-tRNA synthetase	J	Translation, ribosomal structure and biogenesis ;
CAFS_HM_T_00038250	N-acetylneuraminic acid mutarotase	M	Cell wall/membrane/envelope biogenesis ;
CAFS_HM_T_00033691	--	--	--
CAFS_HM_T_00079203	--	--	--
CAFS_HM_T_00051111	Dihydroorotase or related cyclic amidohydrolase	F	Nucleotide transport and metabolism ;
CAFS_HM_T_00065427	TPP-dependent pyruvate or acetoin dehydrogenase subunit alpha	C	Energy production and conversion ;
CAFS_HM_T_00029609	--	--	--
CAFS_HM_T_00015662	--	--	--
CAFS_HM_T_00053158	20S proteasome, alpha and beta subunits	O	Posttranslational modification, protein turnover, chaperones ;
CAFS_HM_T_00030402	Succinate dehydrogenase/fumarate reductase, flavoprotein subunit	C	Energy production and conversion ;
CAFS_HM_T_00045822	Ribosomal protein S4E	J	Translation, ribosomal structure and biogenesis ;
CAFS_HM_T_00090410	Acyl-CoA dehydrogenase related to the alkylation response protein AidB	I	Lipid transport and metabolism ;
CAFS_HM_T_00029945	RNA recognition motif (RRM) domain	J	Translation, ribosomal structure and biogenesis ;
CAFS_HM_T_00016595	Cytochrome P450	QV	Secondary metabolites biosynthesis, transport and catabolism ; Defense mechanisms ;
CAFS_HM_T_00000309	Molecular chaperone, HSP90 family	O	Posttranslational modification, protein turnover, chaperones ;
CAFS_HM_T_00047596	Uncharacterized protein, contains GBA2_N and DUF608 domains	S	Function unknown ;
CAFS_HM_T_00081054	Ribosomal protein L2	J	Translation, ribosomal structure and biogenesis ;
CAFS_HM_T_00055819	Superfamily II DNA and RNA helicase	L	Replication, recombination and repair ;
CAFS_HM_T_00031202	--	--	--
CAFS_HM_T_00051723	Peroxiredoxin	O	Posttranslational modification, protein turnover, chaperones ;
CAFS_HM_T_00020008	--	--	--
CAFS_HM_T_00009647	GMP synthase, PP-ATPase domain/subunit	F	Nucleotide transport and metabolism ;
CAFS_HM_T_00017188	Ribosomal protein L18	J	Translation, ribosomal structure and biogenesis ;
CAFS_HM_T_00009747	tRNA(Met) C34 N-acetyltransferase TmcA	J	Translation, ribosomal structure and biogenesis ;
CAFS_HM_T_00058680	--	--	--
CAFS_HM_T_00034480	Serine protease inhibitor	O	Posttranslational modification, protein turnover, chaperones ;
CAFS_HM_T_00018523	--	--	--
CAFS_HM_T_00085736	Translation elongation factor EF-G, a GTPase	J	Translation, ribosomal structure and biogenesis ;
CAFS_HM_T_00065429	Serine/threonine protein kinase	T	Signal transduction mechanisms ;
CAFS_HM_T_00055875	Predicted O-methyltransferase YrrM	R	General function prediction only ;
CAFS_HM_T_00070298	Succinyl-CoA synthetase, alpha subunit	C	Energy production and conversion ;
CAFS_HM_T_00088739	Ca2+-binding protein, EF-hand superfamily	T	Signal transduction mechanisms ;
CAFS_HM_T_00092004	Serine protease, subtilase family	O	Posttranslational modification, protein turnover, chaperones ;
CAFS_HM_T_00016084	Ribosomal protein S5	J	Translation, ribosomal structure and biogenesis ;
CAFS_HM_T_00018049	Methionyl-tRNA synthetase	J	Translation, ribosomal structure and biogenesis ;
CAFS_HM_T_00045124	Acyl-CoA reductase or other NAD-dependent aldehyde dehydrogenase	C	Energy production and conversion ;
CAFS_HM_T_00028088	Prolyl oligopeptidase PreP, S9A serine peptidase family	E	Amino acid transport and metabolism ;
CAFS_HM_T_00064081	--	--	--
CAFS_HM_T_00017527	Enolase	G	Carbohydrate transport and metabolism ;
CAFS_HM_T_00034377	Dipeptidase	E	Amino acid transport and metabolism ;
CAFS_HM_T_00012602	--	--	--
CAFS_HM_T_00049206	--	--	--
CAFS_HM_T_00055945	Translation initiation factor RLI1, contains Fe-S and AAA+ ATPase domains	J	Translation, ribosomal structure and biogenesis ;
CAFS_HM_T_00082670	Purine nucleoside phosphorylase	F	Nucleotide transport and metabolism ;
CAFS_HM_T_00057589	Arginase family enzyme	E	Amino acid transport and metabolism ;
CAFS_HM_T_00000636	Cytochrome P450	QV	Secondary metabolites biosynthesis, transport and catabolism ; Defense mechanisms ;
CAFS_HM_T_00018595	--	--	--
CAFS_HM_T_00071620	--	--	--
CAFS_HM_T_00062757	Peptidyl-prolyl cis-trans isomerase (rotamase) - cyclophilin family	O	Posttranslational modification, protein turnover, chaperones ;
CAFS_HM_T_00044595	--	--	--
CAFS_HM_T_00070447	Superfamily II DNA and RNA helicase	L	Replication, recombination and repair ;
CAFS_HM_T_00077336	Glycosidase	G	Carbohydrate transport and metabolism ;
CAFS_HM_T_00008273	Xaa-Pro aminopeptidase	E	Amino acid transport and metabolism ;
CAFS_HM_T_00015634	--	--	--
CAFS_HM_T_00029976	Glycerol-3-phosphate dehydrogenase	C	Energy production and conversion ;
CAFS_HM_T_00073332	Glycerol kinase	C	Energy production and conversion ;
CAFS_HM_T_00024850	Secreted trypsin-like serine protease	O	Posttranslational modification, protein turnover, chaperones ;
CAFS_HM_T_00070467	Polyribonucleotide nucleotidyltransferase (polynucleotide phosphorylase)	J	Translation, ribosomal structure and biogenesis ;
CAFS_HM_T_00019248	--	--	--
CAFS_HM_T_00031224	Prolyl oligopeptidase PreP, S9A serine peptidase family	E	Amino acid transport and metabolism ;
CAFS_HM_T_00005027	--	--	--
CAFS_HM_T_00009377	--	--	--
CAFS_HM_T_00043184	Glutaredoxin-related protein	O	Posttranslational modification, protein turnover, chaperones ;
CAFS_HM_T_00006377	--	--	--
CAFS_HM_T_00070925	Chromosome segregation ATPase	D	Cell cycle control, cell division, chromosome partitioning ;
CAFS_HM_T_00052474	--	--	--
CAFS_HM_T_00065280	Aminopeptidase N	E	Amino acid transport and metabolism ;
CAFS_HM_T_00088449	--	--	--
CAFS_HM_T_00046550	Catalase	P	Inorganic ion transport and metabolism ;
CAFS_HM_T_00058131	Thioesterase domain of type I polyketide synthase or non-ribosomal peptide synthetase	Q	Secondary metabolites biosynthesis, transport and catabolism ;
CAFS_HM_T_00049474	Predicted ribosome-associated RNA-binding protein Tma20, contains PUA domain	J	Translation, ribosomal structure and biogenesis ;
CAFS_HM_T_00060340	Enoyl-CoA hydratase/carnithine racemase	I	Lipid transport and metabolism ;
CAFS_HM_T_00046921	Leucine-rich repeat (LRR) protein	K	Transcription ;
CAFS_HM_T_00086819	Ubiquinone/menaquinone biosynthesis C-methylase UbiE	H	Coenzyme transport and metabolism ;
CAFS_HM_T_00006597	Acetylornithine deacetylase/Succinyl-diaminopimelate desuccinylase or related deacylase	E	Amino acid transport and metabolism ;
CAFS_HM_T_00064915	Serine/threonine protein kinase	T	Signal transduction mechanisms ;
CAFS_HM_T_00009694	TPP-dependent pyruvate or acetoin dehydrogenase subunit alpha	C	Energy production and conversion ;
CAFS_HM_T_00004032	S-adenosylmethionine synthetase	H	Coenzyme transport and metabolism ;
CAFS_HM_T_00071568	--	--	--
CAFS_HM_T_00006815	Uncharacterized protein	S	Function unknown ;
CAFS_HM_T_00064199	20S proteasome, alpha and beta subunits	O	Posttranslational modification, protein turnover, chaperones ;
CAFS_HM_T_00006990	--	--	--
CAFS_HM_T_00073316	--	--	--
CAFS_HM_T_00080256	--	--	--
CAFS_HM_T_00069616	Ubiquitin	O	Posttranslational modification, protein turnover, chaperones ;
CAFS_HM_T_00079234	Multicopper oxidase with three cupredoxin domains (includes cell division protein FtsP and spore coat protein CotA)	DPM	Cell cycle control, cell division, chromosome partitioning ; Inorganic ion transport and metabolism ; Cell wall/membrane/envelope biogenesis ;
CAFS_HM_T_00057814	NAD(P)-dependent dehydrogenase, short-chain alcohol dehydrogenase family	IQR	Lipid transport and metabolism ; Secondary metabolites biosynthesis, transport and catabolism ; General function prediction only ;
CAFS_HM_T_00077687	Carbonic anhydrase	P	Inorganic ion transport and metabolism ;
CAFS_HM_T_00026905	Nicotinic acid phosphoribosyltransferase	H	Coenzyme transport and metabolism ;
CAFS_HM_T_00041762	--	--	--
CAFS_HM_T_00026579	Uncharacterized conserved protein RhaS, contains 28 RHS repeats	R	General function prediction only ;
CAFS_HM_T_00026816	RNA-splicing ligase RtcB, repairs tRNA damage	J	Translation, ribosomal structure and biogenesis ;
CAFS_HM_T_00019364	Ca2+-binding protein, EF-hand superfamily	T	Signal transduction mechanisms ;
CAFS_HM_T_00036942	--	--	--
CAFS_HM_T_00091213	Ubiquinone/menaquinone biosynthesis C-methylase UbiE	H	Coenzyme transport and metabolism ;
CAFS_HM_T_00069422	Ribosomal protein L10	J	Translation, ribosomal structure and biogenesis ;
CAFS_HM_T_00057141	--	--	--
CAFS_HM_T_00019304	--	--	--
CAFS_HM_T_00062089	Long-chain acyl-CoA synthetase (AMP-forming)	I	Lipid transport and metabolism ;
CAFS_HM_T_00065807	--	--	--
CAFS_HM_T_00008618	Pyruvate/2-oxoglutarate dehydrogenase complex, dihydrolipoamide acyltransferase (E2) component	C	Energy production and conversion ;
CAFS_HM_T_00091900	Diadenosine tetraphosphatase ApaH/serine/threonine protein phosphatase, PP2A family	T	Signal transduction mechanisms ;
CAFS_HM_T_00042861	--	--	--
CAFS_HM_T_00084561	NAD(P)-dependent dehydrogenase, short-chain alcohol dehydrogenase family	IQR	Lipid transport and metabolism ; Secondary metabolites biosynthesis, transport and catabolism ; General function prediction only ;
CAFS_HM_T_00054643	--	--	--
CAFS_HM_T_00081974	Cytochrome P450	QV	Secondary metabolites biosynthesis, transport and catabolism ; Defense mechanisms ;
CAFS_HM_T_00051346	--	--	--
CAFS_HM_T_00029911	--	--	--
CAFS_HM_T_00076677	Secreted protein containing bacterial Ig-like domain and vWFA domain	R	General function prediction only ;
CAFS_HM_T_00028007	--	--	--
CAFS_HM_T_00027846	--	--	--
CAFS_HM_T_00074958	Alkyl hydroperoxide reductase subunit AhpC (peroxiredoxin)	V	Defense mechanisms ;
CAFS_HM_T_00011616	--	--	--
CAFS_HM_T_00040130	--	--	--
CAFS_HM_T_00029544	Pimeloyl-ACP methyl ester carboxylesterase	HR	Coenzyme transport and metabolism ; General function prediction only ;
CAFS_HM_T_00090685	Alpha-glucosidase, glycosyl hydrolase family GH31	G	Carbohydrate transport and metabolism ;
CAFS_HM_T_00005943	--	--	--
CAFS_HM_T_00004557	dsDNA-specific endonuclease/ATPase MutS2	L	Replication, recombination and repair ;
CAFS_HM_T_00007967	GTPase SAR1 family domain	R	General function prediction only ;
CAFS_HM_T_00041167	Dipeptidyl aminopeptidase/acylaminoacyl peptidase	E	Amino acid transport and metabolism ;
CAFS_HM_T_00054675	Predicted oxidoreductase (related to aryl-alcohol dehydrogenase)	R	General function prediction only ;
CAFS_HM_T_00074762	Regulator of protease activity HflC, stomatin/prohibitin superfamily	O	Posttranslational modification, protein turnover, chaperones ;
CAFS_HM_T_00016582	RNA processing factor Prp31, contains Nop domain	J	Translation, ribosomal structure and biogenesis ;
CAFS_HM_T_00048841	--	--	--
CAFS_HM_T_00023145	Galactose mutarotase or related enzyme	G	Carbohydrate transport and metabolism ;
CAFS_HM_T_00077024	Superfamily II DNA and RNA helicase	L	Replication, recombination and repair ;
CAFS_HM_T_00019317	--	--	--
CAFS_HM_T_00003676	--	--	--
CAFS_HM_T_00077011	--	--	--
CAFS_HM_T_00069561	--	--	--
CAFS_HM_T_00011576	Carboxylesterase type B	I	Lipid transport and metabolism ;
CAFS_HM_T_00081148	DNA-binding transcriptional regulator, MarR family	K	Transcription ;
CAFS_HM_T_00021736	Chromosome segregation ATPase	D	Cell cycle control, cell division, chromosome partitioning ;
CAFS_HM_T_00008491	--	--	--
CAFS_HM_T_00051077	--	--	--
CAFS_HM_T_00088094	Chromosome segregation ATPase	D	Cell cycle control, cell division, chromosome partitioning ;
CAFS_HM_T_00062063	--	--	--
CAFS_HM_T_00013276	--	--	--
CAFS_HM_T_00023138	Secreted/periplasmic Zn-dependent peptidases, insulinase-like	O	Posttranslational modification, protein turnover, chaperones ;
CAFS_HM_T_00034209	Diadenosine tetraphosphatase ApaH/serine/threonine protein phosphatase, PP2A family	T	Signal transduction mechanisms ;
CAFS_HM_T_00026419	Ca2+-binding protein, EF-hand superfamily	T	Signal transduction mechanisms ;
CAFS_HM_T_00054687	Putative intracellular protease/amidase	R	General function prediction only ;
CAFS_HM_T_00013580	Diadenosine tetraphosphatase ApaH/serine/threonine protein phosphatase, PP2A family	T	Signal transduction mechanisms ;
CAFS_HM_T_00008931	Adenosine deaminase	F	Nucleotide transport and metabolism ;
CAFS_HM_T_00071518	Predicted choloylglycine hydrolase	R	General function prediction only ;
CAFS_HM_T_00085016	--	--	--
CAFS_HM_T_00057886	Ribosomal protein L16/L10AE	J	Translation, ribosomal structure and biogenesis ;
CAFS_HM_T_00079193	FoF1-type ATP synthase, delta subunit	C	Energy production and conversion ;
CAFS_HM_T_00008960	ATP-dependent Lon protease, bacterial type	O	Posttranslational modification, protein turnover, chaperones ;
CAFS_HM_T_00049273	HrpA-like RNA helicase	J	Translation, ribosomal structure and biogenesis ;
CAFS_HM_T_00019105	Adenylate kinase or related kinase	F	Nucleotide transport and metabolism ;
CAFS_HM_T_00049353	Diadenosine tetraphosphatase ApaH/serine/threonine protein phosphatase, PP2A family	T	Signal transduction mechanisms ;
CAFS_HM_T_00047132	Secreted trypsin-like serine protease	O	Posttranslational modification, protein turnover, chaperones ;
CAFS_HM_T_00021130	Secreted trypsin-like serine protease	O	Posttranslational modification, protein turnover, chaperones ;
CAFS_HM_T_00079213	Superfamily II DNA and RNA helicase	L	Replication, recombination and repair ;
CAFS_HM_T_00050183	Pyruvate/2-oxoglutarate dehydrogenase complex, dihydrolipoamide acyltransferase (E2) component	C	Energy production and conversion ;
CAFS_HM_T_00069566	Cytochrome P450	QV	Secondary metabolites biosynthesis, transport and catabolism ; Defense mechanisms ;
CAFS_HM_T_00037961	Chromosome segregation ATPase	D	Cell cycle control, cell division, chromosome partitioning ;
CAFS_HM_T_00084563	Type V secretory pathway, adhesin AidA	MU	Cell wall/membrane/envelope biogenesis ; Intracellular trafficking, secretion, and vesicular transport ;
CAFS_HM_T_00047068	Arylamine N-acetyltransferase	Q	Secondary metabolites biosynthesis, transport and catabolism ;
CAFS_HM_T_00012421	Predicted Zn-dependent peptidase	R	General function prediction only ;
CAFS_HM_T_00092375	--	--	--
CAFS_HM_T_00077479	ATP-dependent Zn proteases	O	Posttranslational modification, protein turnover, chaperones ;
CAFS_HM_T_00011702	Aldo/keto reductase, related to diketogulonate reductase	Q	Secondary metabolites biosynthesis, transport and catabolism ;
CAFS_HM_T_00082246	Guanylate kinase	F	Nucleotide transport and metabolism ;
CAFS_HM_T_00078506	--	--	--
CAFS_HM_T_00018448	Acyl-CoA dehydrogenase related to the alkylation response protein AidB	I	Lipid transport and metabolism ;
CAFS_HM_T_00013460	Predicted RNA methylase	R	General function prediction only ;
CAFS_HM_T_00043428	Leucine-rich repeat (LRR) protein	K	Transcription ;
CAFS_HM_T_00026047	Secreted protein containing bacterial Ig-like domain and vWFA domain	R	General function prediction only ;
CAFS_HM_T_00060098	Serine protease inhibitor	O	Posttranslational modification, protein turnover, chaperones ;
CAFS_HM_T_00039442	WD40 repeat	R	General function prediction only ;
CAFS_HM_T_00024062	--	--	--
CAFS_HM_T_00053545	--	--	--
CAFS_HM_T_00052904	N-acetyl-beta-hexosaminidase	G	Carbohydrate transport and metabolism ;
CAFS_HM_T_00067071	Alkyl hydroperoxide reductase subunit AhpC (peroxiredoxin)	V	Defense mechanisms ;
CAFS_HM_T_00018366	Succinyl-CoA synthetase, beta subunit	C	Energy production and conversion ;
CAFS_HM_T_00016532	Ribosome-binding ATPase YchF, GTP1/OBG family	J	Translation, ribosomal structure and biogenesis ;
CAFS_HM_T_00072456	Neutral trehalase	G	Carbohydrate transport and metabolism ;
CAFS_HM_T_00024304	--	--	--
CAFS_HM_T_00085115	ATP-dependent 26S proteasome regulatory subunit	O	Posttranslational modification, protein turnover, chaperones ;
CAFS_HM_T_00061616	Murein tripeptide amidase MpaA	M	Cell wall/membrane/envelope biogenesis ;
CAFS_HM_T_00008157	--	--	--
CAFS_HM_T_00017895	Molybdopterin or thiamine biosynthesis adenylyltransferase	H	Coenzyme transport and metabolism ;
CAFS_HM_T_00017479	--	--	--
CAFS_HM_T_00015174	Translation elongation factor EF-1alpha (GTPase)	J	Translation, ribosomal structure and biogenesis ;
CAFS_HM_T_00071613	Leucyl aminopeptidase	E	Amino acid transport and metabolism ;
CAFS_HM_T_00083214	Sugar lactone lactonase YvrE	G	Carbohydrate transport and metabolism ;
CAFS_HM_T_00002484	--	--	--
CAFS_HM_T_00065097	--	--	--
CAFS_HM_T_00011977	--	--	--
CAFS_HM_T_00084241	Geranylgeranyl pyrophosphate synthase	H	Coenzyme transport and metabolism ;
CAFS_HM_T_00006976	--	--	--
CAFS_HM_T_00063185	--	--	--
CAFS_HM_T_00032670	--	--	--
CAFS_HM_T_00071580	Phosphomannomutase	G	Carbohydrate transport and metabolism ;
CAFS_HM_T_00037469	Glutathione S-transferase	O	Posttranslational modification, protein turnover, chaperones ;
CAFS_HM_T_00051644	Glucan phosphorylase	G	Carbohydrate transport and metabolism ;
CAFS_HM_T_00001696	--	--	--
CAFS_HM_T_00016133	Leucyl aminopeptidase	E	Amino acid transport and metabolism ;
CAFS_HM_T_00011903	FKBP-type peptidyl-prolyl cis-trans isomerase	O	Posttranslational modification, protein turnover, chaperones ;
CAFS_HM_T_00075789	HrpA-like RNA helicase	J	Translation, ribosomal structure and biogenesis ;
CAFS_HM_T_00017817	Cysteine protease, C1A family	O	Posttranslational modification, protein turnover, chaperones ;
CAFS_HM_T_00078779	3-hydroxyacyl-CoA dehydrogenase	I	Lipid transport and metabolism ;
CAFS_HM_T_00053179	Glutathione peroxidase, house-cleaning role in reducing lipid peroxides	VI	Defense mechanisms ; Lipid transport and metabolism ;
CAFS_HM_T_00086794	--	--	--
CAFS_HM_T_00085144	Fibrillarin-like rRNA methylase	J	Translation, ribosomal structure and biogenesis ;
CAFS_HM_T_00009409	--	--	--
CAFS_HM_T_00069658	--	--	--
CAFS_HM_T_00051499	--	--	--
CAFS_HM_T_00051946	--	--	--
CAFS_HM_T_00008161	--	--	--
CAFS_HM_T_00004330	--	--	--
CAFS_HM_T_00014740	N-acetylglucosamine-6-phosphate deacetylase	G	Carbohydrate transport and metabolism ;
CAFS_HM_T_00060246	--	--	--
CAFS_HM_T_00000241	--	--	--
CAFS_HM_T_00020686	--	--	--
CAFS_HM_T_00023350	Ribose 5-phosphate isomerase	G	Carbohydrate transport and metabolism ;
CAFS_HM_T_00035741	Pyruvate/2-oxoglutarate dehydrogenase complex, dihydrolipoamide dehydrogenase (E3) component or related enzyme	C	Energy production and conversion ;
CAFS_HM_T_00046608	Serine/threonine protein kinase	T	Signal transduction mechanisms ;
CAFS_HM_T_00069991	--	--	--
CAFS_HM_T_00085825	Enoyl-CoA hydratase/carnithine racemase	I	Lipid transport and metabolism ;
CAFS_HM_T_00011847	GTPase SAR1 family domain	R	General function prediction only ;
CAFS_HM_T_00007088	Septal ring factor EnvC, activator of murein hydrolases AmiA and AmiB	D	Cell cycle control, cell division, chromosome partitioning ;
CAFS_HM_T_00084054	--	--	--
CAFS_HM_T_00041965	--	--	--
CAFS_HM_T_00083067	Predicted dinucleotide-binding enzyme	R	General function prediction only ;
CAFS_HM_T_00033022	Glycerol-3-phosphate O-acyltransferase	I	Lipid transport and metabolism ;
CAFS_HM_T_00013037	Cytochrome P450	QV	Secondary metabolites biosynthesis, transport and catabolism ; Defense mechanisms ;
CAFS_HM_T_00080722	Predicted metal-dependent hydrolase, TIM-barrel fold	R	General function prediction only ;
CAFS_HM_T_00043054	--	--	--
CAFS_HM_T_00086699	Glycine/D-amino acid oxidase (deaminating)	E	Amino acid transport and metabolism ;
CAFS_HM_T_00031822	Allantoicase	F	Nucleotide transport and metabolism ;
CAFS_HM_T_00069393	Argininosuccinate synthase	E	Amino acid transport and metabolism ;
CAFS_HM_T_00057231	--	--	--
CAFS_HM_T_00018725	--	--	--
CAFS_HM_T_00076349	Superfamily I DNA and/or RNA helicase	L	Replication, recombination and repair ;
CAFS_HM_T_00020202	20S proteasome, alpha and beta subunits	O	Posttranslational modification, protein turnover, chaperones ;
CAFS_HM_T_00061688	--	--	--
CAFS_HM_T_00056573	Methionine aminopeptidase	J	Translation, ribosomal structure and biogenesis ;
CAFS_HM_T_00013316	--	--	--
CAFS_HM_T_00013914	NADPH:quinone reductase or related Zn-dependent oxidoreductase	CR	Energy production and conversion ; General function prediction only ;
CAFS_HM_T_00059190	GTPase SAR1 family domain	R	General function prediction only ;
CAFS_HM_T_00015899	--	--	--
CAFS_HM_T_00022101	--	--	--
CAFS_HM_T_00004114	Archaeal/vacuolar-type H+-ATPase subunit B/Vma2	C	Energy production and conversion ;
CAFS_HM_T_00059461	Translation elongation factor P (EF-P)/translation initiation factor 5A (eIF-5A)	J	Translation, ribosomal structure and biogenesis ;
CAFS_HM_T_00070526	Malate/lactate dehydrogenase	C	Energy production and conversion ;
CAFS_HM_T_00003554	Acetyl/propionyl-CoA carboxylase, alpha subunit	I	Lipid transport and metabolism ;
CAFS_HM_T_00029546	20S proteasome, alpha and beta subunits	O	Posttranslational modification, protein turnover, chaperones ;
CAFS_HM_T_00033128	Glutathione S-transferase	O	Posttranslational modification, protein turnover, chaperones ;
CAFS_HM_T_00016872	Serine/threonine protein kinase	T	Signal transduction mechanisms ;
CAFS_HM_T_00038844	Predicted Zn-dependent protease	O	Posttranslational modification, protein turnover, chaperones ;
CAFS_HM_T_00061160	Translation initiation factor 2, gamma subunit (eIF-2gamma; GTPase)	J	Translation, ribosomal structure and biogenesis ;
CAFS_HM_T_00080803	S-formylglutathione hydrolase FrmB	V	Defense mechanisms ;
CAFS_HM_T_00081805	Midasin, AAA ATPase with vWA domain, involved in ribosome maturation	J	Translation, ribosomal structure and biogenesis ;
CAFS_HM_T_00069881	--	--	--
CAFS_HM_T_00080766	Putative NADPH-quinone reductase (modulator of drug activity B)	R	General function prediction only ;
CAFS_HM_T_00036832	ABC-type multidrug transport system, ATPase component	V	Defense mechanisms ;
CAFS_HM_T_00021256	--	--	--
CAFS_HM_T_00046251	--	--	--
CAFS_HM_T_00056859	--	--	--
CAFS_HM_T_00020940	--	--	--
CAFS_HM_T_00018477	Methionine aminopeptidase	J	Translation, ribosomal structure and biogenesis ;
CAFS_HM_T_00035945	Magnesium-transporting ATPase (P-type)	P	Inorganic ion transport and metabolism ;
CAFS_HM_T_00023185	Guanine-nucleotide exchange factor, contains Sec7 domain	R	General function prediction only ;
CAFS_HM_T_00029706	20S proteasome, alpha and beta subunits	O	Posttranslational modification, protein turnover, chaperones ;
CAFS_HM_T_00056710	Spermidine synthase	E	Amino acid transport and metabolism ;
CAFS_HM_T_00059330	--	--	--
CAFS_HM_T_00055287	Cysteine sulfinate desulfinase/cysteine desulfurase or related enzyme	E	Amino acid transport and metabolism ;
CAFS_HM_T_00076681	Secreted protein containing bacterial Ig-like domain and vWFA domain	R	General function prediction only ;
CAFS_HM_T_00035312	--	--	--
CAFS_HM_T_00023628	--	--	--
CAFS_HM_T_00040628	--	--	--
CAFS_HM_T_00034784	GTPase SAR1 family domain	R	General function prediction only ;
CAFS_HM_T_00075449	Predicted arabinose efflux permease, MFS family	G	Carbohydrate transport and metabolism ;
CAFS_HM_T_00054075	Glucose/arabinose dehydrogenase, beta-propeller fold	G	Carbohydrate transport and metabolism ;
CAFS_HM_T_00090368	--	--	--
CAFS_HM_T_00055016	UDP:flavonoid glycosyltransferase YjiC, YdhE family	G	Carbohydrate transport and metabolism ;
CAFS_HM_T_00089874	Threonine dehydratase	E	Amino acid transport and metabolism ;
CAFS_HM_T_00026258	Predicted phosphoesterase, related to the Icc protein	R	General function prediction only ;
CAFS_HM_T_00008768	Chromosome segregation ATPase	D	Cell cycle control, cell division, chromosome partitioning ;
CAFS_HM_T_00044087	Diadenosine tetraphosphatase ApaH/serine/threonine protein phosphatase, PP2A family	T	Signal transduction mechanisms ;
CAFS_HM_T_00068186	WD40 repeat	R	General function prediction only ;
CAFS_HM_T_00052127	Phenylpyruvate tautomerase PptA, 4-oxalocrotonate tautomerase family	Q	Secondary metabolites biosynthesis, transport and catabolism ;
CAFS_HM_T_00057974	--	--	--
CAFS_HM_T_00030647	GTPase SAR1 family domain	R	General function prediction only ;
CAFS_HM_T_00005452	--	--	--
CAFS_HM_T_00024454	Malate/lactate dehydrogenase	C	Energy production and conversion ;
CAFS_HM_T_00049694	--	--	--
CAFS_HM_T_00034200	RNA recognition motif (RRM) domain	J	Translation, ribosomal structure and biogenesis ;
CAFS_HM_T_00024976	--	--	--
CAFS_HM_T_00026091	Acyl-coenzyme A synthetase/AMP-(fatty) acid ligase	I	Lipid transport and metabolism ;
CAFS_HM_T_00062017	--	--	--
CAFS_HM_T_00019253	Predicted amidohydrolase	R	General function prediction only ;
CAFS_HM_T_00071329	4-hydroxyphenylpyruvate dioxygenase and related hemolysins	ER	Amino acid transport and metabolism ; General function prediction only ;
CAFS_HM_T_00029352	Predicted NTPase, NACHT family domain	T	Signal transduction mechanisms ;
CAFS_HM_T_00075796	Uncharacterized membrane protein YhgE, phage infection protein (PIP) family	S	Function unknown ;
CAFS_HM_T_00020711	--	--	--
CAFS_HM_T_00054386	Rhodanese-related sulfurtransferase	P	Inorganic ion transport and metabolism ;
CAFS_HM_T_00051731	Adenylosuccinate synthase	F	Nucleotide transport and metabolism ;
CAFS_HM_T_00073474	Lantibiotic modifying enzyme	V	Defense mechanisms ;
CAFS_HM_T_00009327	--	--	--
CAFS_HM_T_00036307	--	--	--
CAFS_HM_T_00006369	Ubiquitin-protein ligase	O	Posttranslational modification, protein turnover, chaperones ;
CAFS_HM_T_00067327	Ubiquitin-protein ligase	O	Posttranslational modification, protein turnover, chaperones ;
CAFS_HM_T_00069428	Beta-galactosidase/beta-glucuronidase	G	Carbohydrate transport and metabolism ;
CAFS_HM_T_00007071	Ca2+-binding protein, RTX toxin-related	Q	Secondary metabolites biosynthesis, transport and catabolism ;
CAFS_HM_T_00029577	Adenylate kinase or related kinase	F	Nucleotide transport and metabolism ;
CAFS_HM_T_00021812	Secreted protein containing bacterial Ig-like domain and vWFA domain	R	General function prediction only ;
CAFS_HM_T_00046845	--	--	--
CAFS_HM_T_00009206	Leucine-rich repeat (LRR) protein	K	Transcription ;
CAFS_HM_T_00016637	--	--	--
CAFS_HM_T_00072048	--	--	--
CAFS_HM_T_00078103	--	--	--
CAFS_HM_T_00002200	--	--	--
CAFS_HM_T_00072192	--	--	--
CAFS_HM_T_00033135	WGR domain, predicted DNA-binding domain in MolR	K	Transcription ;
CAFS_HM_T_00023055	Serine/threonine protein phosphatase PrpC	T	Signal transduction mechanisms ;
CAFS_HM_T_00000544	Cell division protein DamX, binds to the septal ring, contains C-terminal SPOR domain	D	Cell cycle control, cell division, chromosome partitioning ;
CAFS_HM_T_00032155	--	--	--
CAFS_HM_T_00009751	Isopenicillin N synthase and related dioxygenases	Q	Secondary metabolites biosynthesis, transport and catabolism ;
CAFS_HM_T_00054211	--	--	--
CAFS_HM_T_00001865	20S proteasome, alpha and beta subunits	O	Posttranslational modification, protein turnover, chaperones ;
CAFS_HM_T_00029757	--	--	--
CAFS_HM_T_00022484	Serine/threonine protein phosphatase PrpC	T	Signal transduction mechanisms ;
CAFS_HM_T_00027955	--	--	--
CAFS_HM_T_00024372	--	--	--
CAFS_HM_T_00021265	Uncharacterized conserved protein YukE	S	Function unknown ;
CAFS_HM_T_00086332	1,4-alpha-glucan branching enzyme	G	Carbohydrate transport and metabolism ;
CAFS_HM_T_00009902	--	--	--
CAFS_HM_T_00006758	Diadenosine tetraphosphate (Ap4A) hydrolase or other HIT family hydrolase	FGR	Nucleotide transport and metabolism ; Carbohydrate transport and metabolism ; General function prediction only ;
CAFS_HM_T_00045148	--	--	--
CAFS_HM_T_00018392	Cytochrome P450	QV	Secondary metabolites biosynthesis, transport and catabolism ; Defense mechanisms ;
CAFS_HM_T_00077329	ADP-ribosylglycohydrolase	O	Posttranslational modification, protein turnover, chaperones ;
CAFS_HM_T_00060041	Cu2+-containing amine oxidase	Q	Secondary metabolites biosynthesis, transport and catabolism ;
CAFS_HM_T_00029501	--	--	--
CAFS_HM_T_00027127	Ectoine hydroxylase-related dioxygenase, phytanoyl-CoA dioxygenase (PhyH) family	Q	Secondary metabolites biosynthesis, transport and catabolism ;
CAFS_HM_T_00020070	Ubiquitin	O	Posttranslational modification, protein turnover, chaperones ;
CAFS_HM_T_00021331	Translation initiation factor 2, beta subunit (eIF-2beta)/eIF-5 N-terminal domain	J	Translation, ribosomal structure and biogenesis ;
CAFS_HM_T_00072000	Uncharacterized conserved protein YfaS, alpha-2-macroglobulin family	R	General function prediction only ;
CAFS_HM_T_00069966	GTPase SAR1 family domain	R	General function prediction only ;
CAFS_HM_T_00059317	ABC-type uncharacterized transport system, permease and ATPase components	R	General function prediction only ;
CAFS_HM_T_00040451	--	--	--
CAFS_HM_T_00062281	--	--	--
CAFS_HM_T_00090195	--	--	--
CAFS_HM_T_00052540	Ectoine hydroxylase-related dioxygenase, phytanoyl-CoA dioxygenase (PhyH) family	Q	Secondary metabolites biosynthesis, transport and catabolism ;
CAFS_HM_T_00060614	NAD(P)-dependent dehydrogenase, short-chain alcohol dehydrogenase family	IQR	Lipid transport and metabolism ; Secondary metabolites biosynthesis, transport and catabolism ; General function prediction only ;
CAFS_HM_T_00067443	Acyl-coenzyme A synthetase/AMP-(fatty) acid ligase	I	Lipid transport and metabolism ;
CAFS_HM_T_00079714	--	--	--
CAFS_HM_T_00090003	--	--	--
CAFS_HM_T_00051558	Argininosuccinate lyase	E	Amino acid transport and metabolism ;
CAFS_HM_T_00070004	Phosphoglycerate mutase (BPG-dependent)	G	Carbohydrate transport and metabolism ;
CAFS_HM_T_00025707	--	--	--
CAFS_HM_T_00004853	Asparagine N-glycosylation enzyme, membrane subunit Stt3	O	Posttranslational modification, protein turnover, chaperones ;
CAFS_HM_T_00021922	Glutathione S-transferase	O	Posttranslational modification, protein turnover, chaperones ;
CAFS_HM_T_00054414	Uncharacterized protein, UPF0160 family	S	Function unknown ;
CAFS_HM_T_00043664	Serine/threonine protein phosphatase PrpC	T	Signal transduction mechanisms ;
CAFS_HM_T_00085566	--	--	--
CAFS_HM_T_00048208	Aspartate/tyrosine/aromatic aminotransferase	E	Amino acid transport and metabolism ;
CAFS_HM_T_00019699	--	--	--
CAFS_HM_T_00015969	Superfamily II DNA and RNA helicase	L	Replication, recombination and repair ;
CAFS_HM_T_00045756	Ribulose-5-phosphate 4-epimerase/Fuculose-1-phosphate aldolase	G	Carbohydrate transport and metabolism ;
CAFS_HM_T_00081146	--	--	--
CAFS_HM_T_00000376	Cytochrome P450	QV	Secondary metabolites biosynthesis, transport and catabolism ; Defense mechanisms ;
CAFS_HM_T_00063839	--	--	--
CAFS_HM_T_00038801	GTPase SAR1 family domain	R	General function prediction only ;
CAFS_HM_T_00042759	Fructose-bisphosphate aldolase class 1	G	Carbohydrate transport and metabolism ;
CAFS_HM_T_00062201	--	--	--
CAFS_HM_T_00066067	Cysteine protease, C1A family	O	Posttranslational modification, protein turnover, chaperones ;
CAFS_HM_T_00060161	Negative regulator of GroEL, contains thioredoxin-like and TPR-like domains	O	Posttranslational modification, protein turnover, chaperones ;
CAFS_HM_T_00088954	Cysteine protease, C1A family	O	Posttranslational modification, protein turnover, chaperones ;
CAFS_HM_T_00033503	DnaJ-class molecular chaperone with C-terminal Zn finger domain	O	Posttranslational modification, protein turnover, chaperones ;
CAFS_HM_T_00077233	Protein tyrosine phosphatase	T	Signal transduction mechanisms ;
CAFS_HM_T_00033619	--	--	--
CAFS_HM_T_00089457	Alpha-L-fucosidase	G	Carbohydrate transport and metabolism ;
CAFS_HM_T_00078069	Membrane protein involved in colicin uptake	M	Cell wall/membrane/envelope biogenesis ;
CAFS_HM_T_00074163	NADH:ubiquinone oxidoreductase 24 kD subunit (chain E)	C	Energy production and conversion ;
CAFS_HM_T_00010304	--	--	--
CAFS_HM_T_00079621	NAD(P)H-hydrate repair enzyme Nnr, NAD(P)H-hydrate dehydratase domain	F	Nucleotide transport and metabolism ;
CAFS_HM_T_00087635	--	--	--
CAFS_HM_T_00015619	Molecular chaperone DnaK (HSP70)	O	Posttranslational modification, protein turnover, chaperones ;
CAFS_HM_T_00083396	--	--	--
CAFS_HM_T_00055315	Chitinase, GH18 family	G	Carbohydrate transport and metabolism ;
CAFS_HM_T_00075842	Secreted/periplasmic Zn-dependent peptidases, insulinase-like	O	Posttranslational modification, protein turnover, chaperones ;
CAFS_HM_T_00011210	--	--	--
CAFS_HM_T_00044586	DnaJ-class molecular chaperone with C-terminal Zn finger domain	O	Posttranslational modification, protein turnover, chaperones ;
CAFS_HM_T_00072939	--	--	--
CAFS_HM_T_00057848	--	--	--
CAFS_HM_T_00054653	GTPase SAR1 family domain	R	General function prediction only ;
CAFS_HM_T_00049825	Glucosamine 6-phosphate synthetase, contains amidotransferase and phosphosugar isomerase domains	M	Cell wall/membrane/envelope biogenesis ;
CAFS_HM_T_00036407	ABC-type transport system involved in Fe-S cluster assembly, permease and ATPase components	O	Posttranslational modification, protein turnover, chaperones ;
CAFS_HM_T_00050946	--	--	--
CAFS_HM_T_00016082	Glyoxylase or a related metal-dependent hydrolase, beta-lactamase superfamily II	R	General function prediction only ;
CAFS_HM_T_00054486	--	--	--
CAFS_HM_T_00069169	S-adenosylmethionine synthetase	H	Coenzyme transport and metabolism ;
CAFS_HM_T_00064077	Aminopeptidase N	E	Amino acid transport and metabolism ;
CAFS_HM_T_00007163	Monoamine oxidase	E	Amino acid transport and metabolism ;
CAFS_HM_T_00067097	--	--	--
CAFS_HM_T_00062420	Uncharacterized conserved protein YbjT, contains NAD(P)-binding and DUF2867 domains	R	General function prediction only ;
CAFS_HM_T_00046337	Ser/Thr protein kinase RdoA involved in Cpx stress response, MazF antagonist	T	Signal transduction mechanisms ;
CAFS_HM_T_00010579	Serine/threonine protein kinase	T	Signal transduction mechanisms ;
CAFS_HM_T_00042199	Translation elongation factor EF-1alpha (GTPase)	J	Translation, ribosomal structure and biogenesis ;
CAFS_HM_T_00085525	GTPase SAR1 family domain	R	General function prediction only ;
CAFS_HM_T_00017820	--	--	--
CAFS_HM_T_00085217	20S proteasome, alpha and beta subunits	O	Posttranslational modification, protein turnover, chaperones ;
CAFS_HM_T_00062847	--	--	--
CAFS_HM_T_00039346	GTPase SAR1 family domain	R	General function prediction only ;
CAFS_HM_T_00016265	20S proteasome, alpha and beta subunits	O	Posttranslational modification, protein turnover, chaperones ;
CAFS_HM_T_00037605	Predicted O-linked N-acetylglucosamine transferase, SPINDLY family	O	Posttranslational modification, protein turnover, chaperones ;
CAFS_HM_T_00046853	--	--	--
CAFS_HM_T_00080372	--	--	--
CAFS_HM_T_00019858	WD40 repeat	R	General function prediction only ;
CAFS_HM_T_00036302	Uncharacterized protein, contains caspase domain	R	General function prediction only ;
CAFS_HM_T_00000158	--	--	--
CAFS_HM_T_00048488	GTPase SAR1 family domain	R	General function prediction only ;
CAFS_HM_T_00054461	Superfamily II DNA and RNA helicase	L	Replication, recombination and repair ;
CAFS_HM_T_00073258	--	--	--
CAFS_HM_T_00076854	GTPase SAR1 family domain	R	General function prediction only ;
CAFS_HM_T_00078726	Secreted protein containing bacterial Ig-like domain and vWFA domain	R	General function prediction only ;
CAFS_HM_T_00047267	--	--	--
CAFS_HM_T_00085009	--	--	--
CAFS_HM_T_00088720	--	--	--
CAFS_HM_T_00066920	UDP:flavonoid glycosyltransferase YjiC, YdhE family	G	Carbohydrate transport and metabolism ;
CAFS_HM_T_00070057	--	--	--
CAFS_HM_T_00084142	3-hydroxyisobutyrate dehydrogenase or related beta-hydroxyacid dehydrogenase	I	Lipid transport and metabolism ;
CAFS_HM_T_00084904	--	--	--
CAFS_HM_T_00086814	Uncharacterized conserved protein YfaS, alpha-2-macroglobulin family	R	General function prediction only ;
CAFS_HM_T_00089892	Chromosome segregation ATPase	D	Cell cycle control, cell division, chromosome partitioning ;
CAFS_HM_T_00075450	Translation elongation factor P (EF-P)/translation initiation factor 5A (eIF-5A)	J	Translation, ribosomal structure and biogenesis ;
CAFS_HM_T_00061570	--	--	--
CAFS_HM_T_00016387	--	--	--
CAFS_HM_T_00004178	Peptide chain release factor 1 (eRF1)	J	Translation, ribosomal structure and biogenesis ;
CAFS_HM_T_00034176	--	--	--
CAFS_HM_T_00013385	Ribosomal protein L14	J	Translation, ribosomal structure and biogenesis ;
CAFS_HM_T_00080729	Deoxyadenosine/deoxycytidine kinase	F	Nucleotide transport and metabolism ;
CAFS_HM_T_00076395	Acyl-coenzyme A synthetase/AMP-(fatty) acid ligase	I	Lipid transport and metabolism ;
CAFS_HM_T_00075486	Ribosomal protein S8E	J	Translation, ribosomal structure and biogenesis ;
CAFS_HM_T_00070290	NAD(P)-dependent dehydrogenase, short-chain alcohol dehydrogenase family	IQR	Lipid transport and metabolism ; Secondary metabolites biosynthesis, transport and catabolism ; General function prediction only ;
CAFS_HM_T_00015738	Regulator of protease activity HflC, stomatin/prohibitin superfamily	O	Posttranslational modification, protein turnover, chaperones ;
CAFS_HM_T_00078662	Glutaminase	E	Amino acid transport and metabolism ;
CAFS_HM_T_00070898	--	--	--
CAFS_HM_T_00036451	Nucleoside-diphosphate-sugar epimerase	M	Cell wall/membrane/envelope biogenesis ;
CAFS_HM_T_00005385	--	--	--
CAFS_HM_T_00064019	Molybdopterin or thiamine biosynthesis adenylyltransferase	H	Coenzyme transport and metabolism ;
CAFS_HM_T_00078916	Glutamate formiminotransferase	E	Amino acid transport and metabolism ;
CAFS_HM_T_00064652	UDP:flavonoid glycosyltransferase YjiC, YdhE family	G	Carbohydrate transport and metabolism ;
CAFS_HM_T_00064650	UDP:flavonoid glycosyltransferase YjiC, YdhE family	G	Carbohydrate transport and metabolism ;
CAFS_HM_T_00026214	CBS domain	T	Signal transduction mechanisms ;
CAFS_HM_T_00081621	FAD/FMN-containing dehydrogenase	C	Energy production and conversion ;
CAFS_HM_T_00041384	--	--	--
CAFS_HM_T_00001446	Glycine/D-amino acid oxidase (deaminating)	E	Amino acid transport and metabolism ;
CAFS_HM_T_00038668	Ribosomal protein L1	J	Translation, ribosomal structure and biogenesis ;
CAFS_HM_T_00075113	Ribosomal protein L18	J	Translation, ribosomal structure and biogenesis ;
CAFS_HM_T_00083374	2-polyprenyl-6-methoxyphenol hydroxylase and related FAD-dependent oxidoreductases	HC	Coenzyme transport and metabolism ; Energy production and conversion ;
CAFS_HM_T_00083083	Negative regulator of GroEL, contains thioredoxin-like and TPR-like domains	O	Posttranslational modification, protein turnover, chaperones ;
CAFS_HM_T_00006691	Dihydrodipicolinate synthase/N-acetylneuraminate lyase	EM	Amino acid transport and metabolism ; Cell wall/membrane/envelope biogenesis ;
CAFS_HM_T_00040808	--	--	--
CAFS_HM_T_00040120	--	--	--
CAFS_HM_T_00034469	20S proteasome, alpha and beta subunits	O	Posttranslational modification, protein turnover, chaperones ;
CAFS_HM_T_00010021	ATP-dependent Lon protease, bacterial type	O	Posttranslational modification, protein turnover, chaperones ;
CAFS_HM_T_00064354	--	--	--
CAFS_HM_T_00084441	Spore coat protein CotH	M	Cell wall/membrane/envelope biogenesis ;
CAFS_HM_T_00089903	20S proteasome, alpha and beta subunits	O	Posttranslational modification, protein turnover, chaperones ;
CAFS_HM_T_00042766	--	--	--
CAFS_HM_T_00054805	--	--	--
CAFS_HM_T_00013034	Phage-related protein, tail component	X	Mobilome: prophages, transposons;
CAFS_HM_T_00034948	Peptide chain release factor 1 (eRF1)	J	Translation, ribosomal structure and biogenesis ;
CAFS_HM_T_00042301	ATP sulfurylase (sulfate adenylyltransferase)	P	Inorganic ion transport and metabolism ;
CAFS_HM_T_00046808	Glycine cleavage system H protein (lipoate-binding)	E	Amino acid transport and metabolism ;
CAFS_HM_T_00075465	--	--	--
CAFS_HM_T_00080480	Enoyl-CoA hydratase/carnithine racemase	I	Lipid transport and metabolism ;
CAFS_HM_T_00064907	Ribosomal protein L7Ae or related RNA K-turn-binding protein	J	Translation, ribosomal structure and biogenesis ;
CAFS_HM_T_00012652	DNA gyrase inhibitor GyrI	L	Replication, recombination and repair ;
CAFS_HM_T_00014677	Magnesium-transporting ATPase (P-type)	P	Inorganic ion transport and metabolism ;
CAFS_HM_T_00019221	UDP-N-acetylglucosamine pyrophosphorylase	G	Carbohydrate transport and metabolism ;
CAFS_HM_T_00000185	NAD(P)-dependent dehydrogenase, short-chain alcohol dehydrogenase family	IQR	Lipid transport and metabolism ; Secondary metabolites biosynthesis, transport and catabolism ; General function prediction only ;
CAFS_HM_T_00058041	--	--	--
CAFS_HM_T_00040368	Phosphoglucomutase	G	Carbohydrate transport and metabolism ;
CAFS_HM_T_00010377	Ribosomal protein S3	J	Translation, ribosomal structure and biogenesis ;
CAFS_HM_T_00072570	Translation initiation factor IF-2, a GTPase	J	Translation, ribosomal structure and biogenesis ;
CAFS_HM_T_00057012	Chromosome segregation ATPase	D	Cell cycle control, cell division, chromosome partitioning ;
CAFS_HM_T_00078759	FMN-dependent dehydrogenase, includes L-lactate dehydrogenase and type II isopentenyl diphosphate isomerase	CIR	Energy production and conversion ; Lipid transport and metabolism ; General function prediction only ;
CAFS_HM_T_00077445	GTP-binding protein EngB required for normal cell division	D	Cell cycle control, cell division, chromosome partitioning ;
CAFS_HM_T_00052996	--	--	--
CAFS_HM_T_00038258	Acetoin utilization deacetylase AcuC or a related deacetylase	BQ	Chromatin structure and dynamics ; Secondary metabolites biosynthesis, transport and catabolism ;
CAFS_HM_T_00062620	Regulator of sirC expression, contains transglutaminase-like and TPR domains	T	Signal transduction mechanisms ;
CAFS_HM_T_00046816	HrpA-like RNA helicase	J	Translation, ribosomal structure and biogenesis ;
CAFS_HM_T_00042487	--	--	--
CAFS_HM_T_00011827	--	--	--
CAFS_HM_T_00084823	--	--	--
CAFS_HM_T_00085854	--	--	--
CAFS_HM_T_00002793	Superfamily II DNA and RNA helicase	L	Replication, recombination and repair ;
CAFS_HM_T_00064560	Phage-related protein, tail component	X	Mobilome: prophages, transposons;
CAFS_HM_T_00034604	Cytochrome P450	QV	Secondary metabolites biosynthesis, transport and catabolism ; Defense mechanisms ;
CAFS_HM_T_00084791	Cysteine protease, C1A family	O	Posttranslational modification, protein turnover, chaperones ;
CAFS_HM_T_00053489	N-acetylneuraminic acid mutarotase	M	Cell wall/membrane/envelope biogenesis ;
CAFS_HM_T_00035629	Predicted ATPase	R	General function prediction only ;
CAFS_HM_T_00055544	Proteasome lid subunit RPN8/RPN11, contains Jab1/MPN domain metalloenzyme (JAMM) motif	O	Posttranslational modification, protein turnover, chaperones ;
CAFS_HM_T_00085019	--	--	--
CAFS_HM_T_00078804	Enhancing lycopene biosynthesis protein 2	Q	Secondary metabolites biosynthesis, transport and catabolism ;
CAFS_HM_T_00031271	--	--	--
CAFS_HM_T_00033271	Predicted unusual protein kinase regulating ubiquinone biosynthesis, AarF/ABC1/UbiB family	HT	Coenzyme transport and metabolism ; Signal transduction mechanisms ;
CAFS_HM_T_00078090	Predicted RNA methylase	R	General function prediction only ;
CAFS_HM_T_00021273	Serine protease, subtilase family	O	Posttranslational modification, protein turnover, chaperones ;
CAFS_HM_T_00091649	Sugar or nucleoside kinase, ribokinase family	G	Carbohydrate transport and metabolism ;
CAFS_HM_T_00047319	NAD(P)-dependent dehydrogenase, short-chain alcohol dehydrogenase family	IQR	Lipid transport and metabolism ; Secondary metabolites biosynthesis, transport and catabolism ; General function prediction only ;
CAFS_HM_T_00023042	Fermentation-respiration switch protein FrsA, has esterase activity, DUF1100 family	T	Signal transduction mechanisms ;
CAFS_HM_T_00048637	--	--	--
CAFS_HM_T_00063425	--	--	--
CAFS_HM_T_00022741	Glutathione S-transferase	O	Posttranslational modification, protein turnover, chaperones ;
CAFS_HM_T_00021313	O-acetyl-ADP-ribose deacetylase (regulator of RNase III), contains Macro domain	J	Translation, ribosomal structure and biogenesis ;
CAFS_HM_T_00086072	Ribosomal protein S7	J	Translation, ribosomal structure and biogenesis ;
CAFS_HM_T_00030303	--	--	--
CAFS_HM_T_00042664	Alanyl-tRNA synthetase	J	Translation, ribosomal structure and biogenesis ;
CAFS_HM_T_00030719	--	--	--
CAFS_HM_T_00066835	GTPase SAR1 family domain	R	General function prediction only ;
CAFS_HM_T_00015571	Enoyl-CoA hydratase/carnithine racemase	I	Lipid transport and metabolism ;
CAFS_HM_T_00064735	--	--	--
CAFS_HM_T_00061583	--	--	--
CAFS_HM_T_00035656	Lactate dehydrogenase or related 2-hydroxyacid dehydrogenase	CHR	Energy production and conversion ; Coenzyme transport and metabolism ; General function prediction only ;
CAFS_HM_T_00005959	--	--	--
CAFS_HM_T_00010167	TRAP-type C4-dicarboxylate transport system, large permease component	G	Carbohydrate transport and metabolism ;
CAFS_HM_T_00006426	--	--	--
CAFS_HM_T_00026863	DnaJ-class molecular chaperone with C-terminal Zn finger domain	O	Posttranslational modification, protein turnover, chaperones ;
CAFS_HM_T_00057696	Citrate synthase	C	Energy production and conversion ;
CAFS_HM_T_00090222	Malate/lactate dehydrogenase	C	Energy production and conversion ;
CAFS_HM_T_00003342	--	--	--
CAFS_HM_T_00091181	Cell division protein DamX, binds to the septal ring, contains C-terminal SPOR domain	D	Cell cycle control, cell division, chromosome partitioning ;
CAFS_HM_T_00061552	--	--	--
CAFS_HM_T_00044001	--	--	--
CAFS_HM_T_00050342	Phosphoglycerate mutase (BPG-dependent)	G	Carbohydrate transport and metabolism ;
CAFS_HM_T_00059838	Dienelactone hydrolase	Q	Secondary metabolites biosynthesis, transport and catabolism ;
CAFS_HM_T_00017701	Glucose-6-phosphate 1-dehydrogenase	G	Carbohydrate transport and metabolism ;
CAFS_HM_T_00055671	GTPase SAR1 family domain	R	General function prediction only ;
CAFS_HM_T_00006293	--	--	--
CAFS_HM_T_00024315	GTPase SAR1 family domain	R	General function prediction only ;
CAFS_HM_T_00067401	Outer membrane protein assembly factor BamB, contains PQQ-like beta-propeller repeat	M	Cell wall/membrane/envelope biogenesis ;
CAFS_HM_T_00049442	--	--	--
CAFS_HM_T_00043530	--	--	--
CAFS_HM_T_00017194	--	--	--
CAFS_HM_T_00021542	Zn-dependent alcohol dehydrogenase	R	General function prediction only ;
CAFS_HM_T_00082451	Tetratricopeptide (TPR) repeat	R	General function prediction only ;
CAFS_HM_T_00074511	--	--	--
CAFS_HM_T_00017543	DNA helicase TIP49, TBP-interacting protein	K	Transcription ;
CAFS_HM_T_00046281	--	--	--
CAFS_HM_T_00010681	Signal recognition particle GTPase	U	Intracellular trafficking, secretion, and vesicular transport ;
CAFS_HM_T_00005877	Ribulose-5-phosphate 4-epimerase/Fuculose-1-phosphate aldolase	G	Carbohydrate transport and metabolism ;
CAFS_HM_T_00007620	WD40 repeat	R	General function prediction only ;
CAFS_HM_T_00017438	--	--	--
CAFS_HM_T_00005238	Dipeptidyl aminopeptidase/acylaminoacyl peptidase	E	Amino acid transport and metabolism ;
CAFS_HM_T_00090492	Replication fork clamp-binding protein CrfC (dynamin-like GTPase family)	L	Replication, recombination and repair ;
CAFS_HM_T_00048864	Ca2+-binding protein, EF-hand superfamily	T	Signal transduction mechanisms ;
CAFS_HM_T_00015652	GTPase SAR1 family domain	R	General function prediction only ;
CAFS_HM_T_00041469	NADPH-dependent glutamate synthase beta chain or related oxidoreductase	ER	Amino acid transport and metabolism ; General function prediction only ;
CAFS_HM_T_00018609	Asp-tRNAAsn/Glu-tRNAGln amidotransferase A subunit or related amidase	J	Translation, ribosomal structure and biogenesis ;
CAFS_HM_T_00028967	Glutathione S-transferase	O	Posttranslational modification, protein turnover, chaperones ;
CAFS_HM_T_00013419	Cu2+-containing amine oxidase	Q	Secondary metabolites biosynthesis, transport and catabolism ;
CAFS_HM_T_00063788	Ankyrin repeat	T	Signal transduction mechanisms ;
CAFS_HM_T_00036138	Uncaracterized surface protein containing fasciclin (FAS1) repeats	R	General function prediction only ;
CAFS_HM_T_00049356	--	--	--
CAFS_HM_T_00057694	Uncharacterized pyridoxal phosphate-containing protein, affects Ilv metabolism, UPF0001 family	R	General function prediction only ;
CAFS_HM_T_00050973	Thiol-disulfide isomerase or thioredoxin	O	Posttranslational modification, protein turnover, chaperones ;
CAFS_HM_T_00084171	Chromosome segregation ATPase	D	Cell cycle control, cell division, chromosome partitioning ;
CAFS_HM_T_00020828	Monoamine oxidase	E	Amino acid transport and metabolism ;
CAFS_HM_T_00014748	Acyl-CoA dehydrogenase related to the alkylation response protein AidB	I	Lipid transport and metabolism ;
CAFS_HM_T_00045652	Rieske Fe-S protein	C	Energy production and conversion ;
CAFS_HM_T_00017826	Translation initiation factor 2, beta subunit (eIF-2beta)/eIF-5 N-terminal domain	J	Translation, ribosomal structure and biogenesis ;
CAFS_HM_T_00090784	--	--	--
CAFS_HM_T_00013500	Superfamily II DNA and RNA helicase	L	Replication, recombination and repair ;
CAFS_HM_T_00021009	Regulator of protease activity HflC, stomatin/prohibitin superfamily	O	Posttranslational modification, protein turnover, chaperones ;
CAFS_HM_T_00067460	--	--	--
CAFS_HM_T_00069052	--	--	--
CAFS_HM_T_00092057	Ankyrin repeat	T	Signal transduction mechanisms ;
CAFS_HM_T_00029282	--	--	--
CAFS_HM_T_00081028	DnaJ-class molecular chaperone with C-terminal Zn finger domain	O	Posttranslational modification, protein turnover, chaperones ;
CAFS_HM_T_00030835	CTP synthase (UTP-ammonia lyase)	F	Nucleotide transport and metabolism ;
CAFS_HM_T_00009561	Cytochrome P450	QV	Secondary metabolites biosynthesis, transport and catabolism ; Defense mechanisms ;
CAFS_HM_T_00062026	Galactokinase	G	Carbohydrate transport and metabolism ;
CAFS_HM_T_00064381	Mannose-6-phosphate isomerase, class I	G	Carbohydrate transport and metabolism ;
CAFS_HM_T_00053010	Lysophospholipase, alpha-beta hydrolase superfamily	I	Lipid transport and metabolism ;
CAFS_HM_T_00011558	--	--	--
CAFS_HM_T_00080750	Autotransporter adhesin	UW	Intracellular trafficking, secretion, and vesicular transport ; Extracellular structures ;
CAFS_HM_T_00087698	Phage-related protein, tail component	X	Mobilome: prophages, transposons;
CAFS_HM_T_00062519	FAD/FMN-containing dehydrogenase	C	Energy production and conversion ;
CAFS_HM_T_00040428	Protein tyrosine phosphatase	T	Signal transduction mechanisms ;
CAFS_HM_T_00043781	DNA-directed RNA polymerase, beta' subunit/160 kD subunit	K	Transcription ;
CAFS_HM_T_00084880	PKD repeat	S	Function unknown ;
CAFS_HM_T_00074457	--	--	--
CAFS_HM_T_00068798	Delta-aminolevulinic acid dehydratase, porphobilinogen synthase	H	Coenzyme transport and metabolism ;
CAFS_HM_T_00087652	Diadenosine tetraphosphatase ApaH/serine/threonine protein phosphatase, PP2A family	T	Signal transduction mechanisms ;
CAFS_HM_T_00014122	Tetratricopeptide (TPR) repeat	R	General function prediction only ;
CAFS_HM_T_00051022	GTPase SAR1 family domain	R	General function prediction only ;
CAFS_HM_T_00089584	Forkhead associated (FHA) domain, binds pSer, pThr, pTyr	T	Signal transduction mechanisms ;
CAFS_HM_T_00076739	Cytochrome P450	QV	Secondary metabolites biosynthesis, transport and catabolism ; Defense mechanisms ;
CAFS_HM_T_00089312	RNA recognition motif (RRM) domain	J	Translation, ribosomal structure and biogenesis ;
CAFS_HM_T_00057480	Putative sterol carrier protein	I	Lipid transport and metabolism ;
CAFS_HM_T_00084019	--	--	--
CAFS_HM_T_00026365	3-deoxy-D-manno-octulosonate 8-phosphate phosphatase KdsC and related HAD superfamily phosphatases	MR	Cell wall/membrane/envelope biogenesis ; General function prediction only ;
CAFS_HM_T_00017050	Aspartate/methionine/tyrosine aminotransferase	E	Amino acid transport and metabolism ;
CAFS_HM_T_00057454	Ca2+-binding protein, EF-hand superfamily	T	Signal transduction mechanisms ;
CAFS_HM_T_00021094	Predicted epimerase YddE/YHI9, PhzF superfamily	R	General function prediction only ;
CAFS_HM_T_00045647	--	--	--
CAFS_HM_T_00026614	Zn-dependent amino- or carboxypeptidase, M28 family	O	Posttranslational modification, protein turnover, chaperones ;
CAFS_HM_T_00025124	--	--	--
CAFS_HM_T_00059969	Sugar (pentulose or hexulose) kinase	G	Carbohydrate transport and metabolism ;
CAFS_HM_T_00075342	Serine/threonine protein kinase	T	Signal transduction mechanisms ;
CAFS_HM_T_00021076	Hexokinase	G	Carbohydrate transport and metabolism ;
CAFS_HM_T_00063546	--	--	--
CAFS_HM_T_00028073	SAM-dependent methyltransferase	QR	Secondary metabolites biosynthesis, transport and catabolism ; General function prediction only ;
CAFS_HM_T_00067660	DNA helicase TIP49, TBP-interacting protein	K	Transcription ;
CAFS_HM_T_00037508	RNA recognition motif (RRM) domain	J	Translation, ribosomal structure and biogenesis ;
CAFS_HM_T_00040502	S-adenosylhomocysteine hydrolase	H	Coenzyme transport and metabolism ;
CAFS_HM_T_00063030	--	--	--
CAFS_HM_T_00069351	Diadenosine tetraphosphatase ApaH/serine/threonine protein phosphatase, PP2A family	T	Signal transduction mechanisms ;
CAFS_HM_T_00016432	Glycerol-3-phosphate dehydrogenase	C	Energy production and conversion ;
CAFS_HM_T_00059504	Predicted metalloendopeptidase	O	Posttranslational modification, protein turnover, chaperones ;
CAFS_HM_T_00042401	--	--	--
CAFS_HM_T_00090136	--	--	--
CAFS_HM_T_00049316	Superfamily II DNA and RNA helicase	L	Replication, recombination and repair ;
CAFS_HM_T_00063446	Chromosome segregation ATPase	D	Cell cycle control, cell division, chromosome partitioning ;
CAFS_HM_T_00020634	Glycosylphosphatidylinositol transamidase (GPIT), subunit GPI8	O	Posttranslational modification, protein turnover, chaperones ;
CAFS_HM_T_00048562	Uncharacterized conserved protein YbjT, contains NAD(P)-binding and DUF2867 domains	R	General function prediction only ;
CAFS_HM_T_00013787	Serine/threonine protein kinase	T	Signal transduction mechanisms ;
CAFS_HM_T_00054831	Secreted protein containing bacterial Ig-like domain and vWFA domain	R	General function prediction only ;
CAFS_HM_T_00000705	Predicted ATPase	R	General function prediction only ;
CAFS_HM_T_00016209	--	--	--
CAFS_HM_T_00046640	Large exoprotein involved in heme utilization or adhesion	U	Intracellular trafficking, secretion, and vesicular transport ;
CAFS_HM_T_00091274	--	--	--
CAFS_HM_T_00086398	Uncharacterized membrane protein YqiK, contains Band7/PHB/SPFH domain	S	Function unknown ;
CAFS_HM_T_00013189	--	--	--
CAFS_HM_T_00010298	Ca2+-binding protein, EF-hand superfamily	T	Signal transduction mechanisms ;
CAFS_HM_T_00087508	Secreted trypsin-like serine protease	O	Posttranslational modification, protein turnover, chaperones ;
CAFS_HM_T_00015614	Magnesium-transporting ATPase (P-type)	P	Inorganic ion transport and metabolism ;
CAFS_HM_T_00011710	Cytochrome P450	QV	Secondary metabolites biosynthesis, transport and catabolism ; Defense mechanisms ;
CAFS_HM_T_00001792	--	--	--
CAFS_HM_T_00014230	Iron only hydrogenase large subunit, C-terminal domain	C	Energy production and conversion ;
CAFS_HM_T_00059277	Carbonic anhydrase	P	Inorganic ion transport and metabolism ;
CAFS_HM_T_00015671	--	--	--
CAFS_HM_T_00082931	PASTA domain, binds beta-lactams	M	Cell wall/membrane/envelope biogenesis ;
CAFS_HM_T_00072640	Methionyl-tRNA synthetase	J	Translation, ribosomal structure and biogenesis ;
CAFS_HM_T_00022113	--	--	--
CAFS_HM_T_00023390	Methionine aminopeptidase	J	Translation, ribosomal structure and biogenesis ;
CAFS_HM_T_00024878	20S proteasome, alpha and beta subunits	O	Posttranslational modification, protein turnover, chaperones ;
CAFS_HM_T_00091103	Pyruvate/2-oxoglutarate dehydrogenase complex, dihydrolipoamide acyltransferase (E2) component	C	Energy production and conversion ;
CAFS_HM_T_00081886	Catalase	P	Inorganic ion transport and metabolism ;
CAFS_HM_T_00040039	NADH pyrophosphatase NudC, Nudix superfamily	F	Nucleotide transport and metabolism ;
CAFS_HM_T_00054900	--	--	--
CAFS_HM_T_00004057	Magnesium-transporting ATPase (P-type)	P	Inorganic ion transport and metabolism ;
CAFS_HM_T_00071759	--	--	--
CAFS_HM_T_00013829	Predicted dinucleotide-utilizing enzyme	R	General function prediction only ;
CAFS_HM_T_00086407	--	--	--
CAFS_HM_T_00007037	--	--	--
CAFS_HM_T_00035362	DNA-directed RNA polymerase, beta subunit/140 kD subunit	K	Transcription ;
CAFS_HM_T_00072952	Putative Zn-dependent protease, contains TPR repeats	R	General function prediction only ;
CAFS_HM_T_00075936	20S proteasome, alpha and beta subunits	O	Posttranslational modification, protein turnover, chaperones ;
CAFS_HM_T_00016679	Ribosomal protein S2	J	Translation, ribosomal structure and biogenesis ;
CAFS_HM_T_00053319	NAD(P)-dependent dehydrogenase, short-chain alcohol dehydrogenase family	IQR	Lipid transport and metabolism ; Secondary metabolites biosynthesis, transport and catabolism ; General function prediction only ;
CAFS_HM_T_00059764	Serine/threonine protein kinase	T	Signal transduction mechanisms ;
CAFS_HM_T_00019527	Glycerate-2-kinase	G	Carbohydrate transport and metabolism ;
CAFS_HM_T_00035137	Long-chain acyl-CoA synthetase (AMP-forming)	I	Lipid transport and metabolism ;
CAFS_HM_T_00064310	--	--	--
CAFS_HM_T_00028602	NAD(P)-dependent dehydrogenase, short-chain alcohol dehydrogenase family	IQR	Lipid transport and metabolism ; Secondary metabolites biosynthesis, transport and catabolism ; General function prediction only ;
CAFS_HM_T_00026250	WD40 repeat	R	General function prediction only ;
CAFS_HM_T_00003225	Peptidyl-prolyl cis-trans isomerase (rotamase) - cyclophilin family	O	Posttranslational modification, protein turnover, chaperones ;
CAFS_HM_T_00091218	Glycine/D-amino acid oxidase (deaminating)	E	Amino acid transport and metabolism ;
CAFS_HM_T_00089954	20S proteasome, alpha and beta subunits	O	Posttranslational modification, protein turnover, chaperones ;
CAFS_HM_T_00044079	--	--	--
CAFS_HM_T_00003447	Serine/threonine protein kinase	T	Signal transduction mechanisms ;
CAFS_HM_T_00087328	--	--	--
CAFS_HM_T_00022599	--	--	--
CAFS_HM_T_00061256	Molybdopterin or thiamine biosynthesis adenylyltransferase	H	Coenzyme transport and metabolism ;
CAFS_HM_T_00006180	Predicted lipid-binding transport protein, Tim44 family	I	Lipid transport and metabolism ;
CAFS_HM_T_00026966	S-adenosylhomocysteine hydrolase	H	Coenzyme transport and metabolism ;
CAFS_HM_T_00033433	N-acetylneuraminic acid mutarotase	M	Cell wall/membrane/envelope biogenesis ;
CAFS_HM_T_00056681	Ca2+-binding protein, EF-hand superfamily	T	Signal transduction mechanisms ;
CAFS_HM_T_00040827	--	--	--
CAFS_HM_T_00076920	WD40 repeat	R	General function prediction only ;
CAFS_HM_T_00065317	--	--	--
CAFS_HM_T_00067532	Ribosomal protein L11	J	Translation, ribosomal structure and biogenesis ;
CAFS_HM_T_00081922	--	--	--
CAFS_HM_T_00004948	Actin-related protein	Z	Cytoskeleton ;
CAFS_HM_T_00061641	Acyl-CoA-binding protein	I	Lipid transport and metabolism ;
CAFS_HM_T_00088572	Aminopeptidase C	E	Amino acid transport and metabolism ;
CAFS_HM_T_00021142	Alkyl hydroperoxide reductase subunit AhpC (peroxiredoxin)	V	Defense mechanisms ;
CAFS_HM_T_00017218	Regulator of protease activity HflC, stomatin/prohibitin superfamily	O	Posttranslational modification, protein turnover, chaperones ;
CAFS_HM_T_00000557	WD40 repeat	R	General function prediction only ;
CAFS_HM_T_00046881	Glucoamylase (glucan-1,4-alpha-glucosidase), GH15 family	G	Carbohydrate transport and metabolism ;
CAFS_HM_T_00085296	Glyceraldehyde-3-phosphate dehydrogenase/erythrose-4-phosphate dehydrogenase	G	Carbohydrate transport and metabolism ;
CAFS_HM_T_00001910	Secreted protein containing bacterial Ig-like domain and vWFA domain	R	General function prediction only ;
CAFS_HM_T_00031085	Phytoene/squalene synthetase	I	Lipid transport and metabolism ;
CAFS_HM_T_00046767	Predicted amidohydrolase	R	General function prediction only ;
CAFS_HM_T_00009324	Replication fork clamp-binding protein CrfC (dynamin-like GTPase family)	L	Replication, recombination and repair ;
CAFS_HM_T_00015330	Nucleoside-diphosphate-sugar epimerase	M	Cell wall/membrane/envelope biogenesis ;
CAFS_HM_T_00005478	Predicted ATPase, archaeal AAA+ ATPase superfamily	R	General function prediction only ;
CAFS_HM_T_00037146	RNA recognition motif (RRM) domain	J	Translation, ribosomal structure and biogenesis ;
CAFS_HM_T_00000654	Nucleoside diphosphate kinase	F	Nucleotide transport and metabolism ;
CAFS_HM_T_00011605	--	--	--
CAFS_HM_T_00038366	Serine protease inhibitor	O	Posttranslational modification, protein turnover, chaperones ;
CAFS_HM_T_00034302	--	--	--
CAFS_HM_T_00078440	--	--	--
CAFS_HM_T_00003816	S-adenosylmethionine synthetase	H	Coenzyme transport and metabolism ;
CAFS_HM_T_00068464	Fructose-1,6-bisphosphatase	G	Carbohydrate transport and metabolism ;
CAFS_HM_T_00057859	Guanine-nucleotide exchange factor, contains Sec7 domain	R	General function prediction only ;
CAFS_HM_T_00071730	Ribosomal protein L6P/L9E	J	Translation, ribosomal structure and biogenesis ;
CAFS_HM_T_00019446	Selenocysteine-specific translation elongation factor	J	Translation, ribosomal structure and biogenesis ;
CAFS_HM_T_00054509	WD40 repeat	R	General function prediction only ;
CAFS_HM_T_00032486	Chromosome segregation ATPase	D	Cell cycle control, cell division, chromosome partitioning ;
CAFS_HM_T_00036396	Enhancing lycopene biosynthesis protein 2	Q	Secondary metabolites biosynthesis, transport and catabolism ;
CAFS_HM_T_00009342	--	--	--
CAFS_HM_T_00046939	RNA recognition motif (RRM) domain	J	Translation, ribosomal structure and biogenesis ;
CAFS_HM_T_00031817	--	--	--
CAFS_HM_T_00063949	--	--	--
CAFS_HM_T_00031119	Outer membrane protein assembly factor BamD, BamD/ComL family	M	Cell wall/membrane/envelope biogenesis ;
CAFS_HM_T_00085852	--	--	--
CAFS_HM_T_00051033	--	--	--
CAFS_HM_T_00002401	Ran GTPase-activating protein (RanGAP) involved in mRNA processing and transport	TA	Signal transduction mechanisms ; RNA processing and modification ;
CAFS_HM_T_00033843	Protein-L-isoaspartate O-methyltransferase	O	Posttranslational modification, protein turnover, chaperones ;
CAFS_HM_T_00051688	--	--	--
CAFS_HM_T_00067454	--	--	--
CAFS_HM_T_00041607	--	--	--
CAFS_HM_T_00058826	Superfamily II DNA and RNA helicase	L	Replication, recombination and repair ;
CAFS_HM_T_00038520	GTP-binding protein EngB required for normal cell division	D	Cell cycle control, cell division, chromosome partitioning ;
CAFS_HM_T_00016811	CBS domain	T	Signal transduction mechanisms ;
CAFS_HM_T_00088070	--	--	--
CAFS_HM_T_00026281	Branched-chain amino acid aminotransferase/4-amino-4-deoxychorismate lyase	EH	Amino acid transport and metabolism ; Coenzyme transport and metabolism ;
CAFS_HM_T_00076758	Large exoprotein involved in heme utilization or adhesion	U	Intracellular trafficking, secretion, and vesicular transport ;
CAFS_HM_T_00067055	--	--	--
CAFS_HM_T_00063174	ATP-dependent Zn proteases	O	Posttranslational modification, protein turnover, chaperones ;
CAFS_HM_T_00039199	Peptidyl-prolyl cis-trans isomerase (rotamase) - cyclophilin family	O	Posttranslational modification, protein turnover, chaperones ;
CAFS_HM_T_00029151	--	--	--
CAFS_HM_T_00091897	--	--	--
CAFS_HM_T_00030553	--	--	--
CAFS_HM_T_00013220	Signal-transduction protein containing cAMP-binding, CBS, and nucleotidyltransferase domains	T	Signal transduction mechanisms ;
CAFS_HM_T_00034294	Large exoprotein involved in heme utilization or adhesion	U	Intracellular trafficking, secretion, and vesicular transport ;
CAFS_HM_T_00051016	Long-chain acyl-CoA synthetase (AMP-forming)	I	Lipid transport and metabolism ;
CAFS_HM_T_00031038	--	--	--
CAFS_HM_T_00077847	RNA recognition motif (RRM) domain	J	Translation, ribosomal structure and biogenesis ;
CAFS_HM_T_00008662	--	--	--
CAFS_HM_T_00079937	Serine/threonine protein kinase	T	Signal transduction mechanisms ;
CAFS_HM_T_00027267	--	--	--
CAFS_HM_T_00020661	--	--	--
CAFS_HM_T_00063662	--	--	--
CAFS_HM_T_00049915	--	--	--
CAFS_HM_T_00090680	2-polyprenyl-6-methoxyphenol hydroxylase and related FAD-dependent oxidoreductases	HC	Coenzyme transport and metabolism ; Energy production and conversion ;
CAFS_HM_T_00041049	--	--	--
CAFS_HM_T_00088288	Uncharacterized conserved protein YfaS, alpha-2-macroglobulin family	R	General function prediction only ;
CAFS_HM_T_00017102	Cysteine sulfinate desulfinase/cysteine desulfurase or related enzyme	E	Amino acid transport and metabolism ;
CAFS_HM_T_00090826	--	--	--
CAFS_HM_T_00007207	--	--	--
CAFS_HM_T_00056776	Ribosomal protein L7Ae or related RNA K-turn-binding protein	J	Translation, ribosomal structure and biogenesis ;
CAFS_HM_T_00090579	Sugar or nucleoside kinase, ribokinase family	G	Carbohydrate transport and metabolism ;
CAFS_HM_T_00038937	CBS domain	T	Signal transduction mechanisms ;
CAFS_HM_T_00037274	Glutathione S-transferase	O	Posttranslational modification, protein turnover, chaperones ;
CAFS_HM_T_00072546	--	--	--
CAFS_HM_T_00014913	Phosphoribosylpyrophosphate synthetase	FE	Nucleotide transport and metabolism ; Amino acid transport and metabolism ;
CAFS_HM_T_00045601	--	--	--
CAFS_HM_T_00090865	Translation initiation factor 2, alpha subunit (eIF-2alpha)	J	Translation, ribosomal structure and biogenesis ;
CAFS_HM_T_00039521	Leucine-rich repeat (LRR) protein	K	Transcription ;
CAFS_HM_T_00034512	3'-Phosphoadenosine 5'-phosphosulfate (PAPS) 3'-phosphatase	P	Inorganic ion transport and metabolism ;
CAFS_HM_T_00034442	Enoyl-CoA hydratase/carnithine racemase	I	Lipid transport and metabolism ;
CAFS_HM_T_00041380	Cytochrome P450	QV	Secondary metabolites biosynthesis, transport and catabolism ; Defense mechanisms ;
CAFS_HM_T_00085036	--	--	--
CAFS_HM_T_00078717	Cytochrome P450	QV	Secondary metabolites biosynthesis, transport and catabolism ; Defense mechanisms ;
CAFS_HM_T_00061527	Secreted protein containing bacterial Ig-like domain and vWFA domain	R	General function prediction only ;
CAFS_HM_T_00019214	NAD(P)-dependent dehydrogenase, short-chain alcohol dehydrogenase family	IQR	Lipid transport and metabolism ; Secondary metabolites biosynthesis, transport and catabolism ; General function prediction only ;
CAFS_HM_T_00024483	Leucine-rich repeat (LRR) protein	K	Transcription ;
CAFS_HM_T_00086665	WD40 repeat	R	General function prediction only ;
CAFS_HM_T_00088066	Catechol 2,3-dioxygenase or other lactoylglutathione lyase family enzyme	Q	Secondary metabolites biosynthesis, transport and catabolism ;
CAFS_HM_T_00005119	--	--	--
CAFS_HM_T_00058953	--	--	--
CAFS_HM_T_00086895	NADP-dependent 3-hydroxy acid dehydrogenase YdfG	C	Energy production and conversion ;
CAFS_HM_T_00064934	--	--	--
CAFS_HM_T_00035439	--	--	--
CAFS_HM_T_00058956	Acyl-coenzyme A synthetase/AMP-(fatty) acid ligase	I	Lipid transport and metabolism ;
CAFS_HM_T_00059585	--	--	--
CAFS_HM_T_00087477	--	--	--
CAFS_HM_T_00047031	--	--	--
CAFS_HM_T_00086186	Ankyrin repeat	T	Signal transduction mechanisms ;
CAFS_HM_T_00090804	--	--	--
CAFS_HM_T_00057622	RNA recognition motif (RRM) domain	J	Translation, ribosomal structure and biogenesis ;
CAFS_HM_T_00076753	--	--	--
CAFS_HM_T_00070185	Acyl-CoA dehydrogenase related to the alkylation response protein AidB	I	Lipid transport and metabolism ;
CAFS_HM_T_00020870	Chromosome segregation ATPase	D	Cell cycle control, cell division, chromosome partitioning ;
CAFS_HM_T_00035874	--	--	--
CAFS_HM_T_00045723	--	--	--
CAFS_HM_T_00071736	--	--	--
CAFS_HM_T_00022683	Isoaspartyl peptidase or L-asparaginase, Ntn-hydrolase superfamily	E	Amino acid transport and metabolism ;
CAFS_HM_T_00018827	--	--	--
CAFS_HM_T_00072477	Ribosomal protein S6E (S10)	J	Translation, ribosomal structure and biogenesis ;
CAFS_HM_T_00007349	Ankyrin repeat	T	Signal transduction mechanisms ;
CAFS_HM_T_00048672	DNA-binding transcriptional regulator, MocR family, contains an aminotransferase domain	KE	Transcription ; Amino acid transport and metabolism ;
CAFS_HM_T_00062600	--	--	--
CAFS_HM_T_00001305	Methylthioribose-1-phosphate isomerase (methionine salvage pathway), a paralog of eIF-2B alpha subunit	E	Amino acid transport and metabolism ;
CAFS_HM_T_00071841	--	--	--
CAFS_HM_T_00037372	--	--	--
CAFS_HM_T_00068852	--	--	--
CAFS_HM_T_00032332	Formyltetrahydrofolate synthetase	F	Nucleotide transport and metabolism ;
CAFS_HM_T_00004443	GTPase SAR1 family domain	R	General function prediction only ;
CAFS_HM_T_00003351	Protein tyrosine phosphatase	T	Signal transduction mechanisms ;
CAFS_HM_T_00015205	Carboxypeptidase C (cathepsin A)	E	Amino acid transport and metabolism ;
CAFS_HM_T_00024367	--	--	--
CAFS_HM_T_00013096	Ribosome-interacting GTPase 1	J	Translation, ribosomal structure and biogenesis ;
CAFS_HM_T_00017913	--	--	--
CAFS_HM_T_00008548	GTPase SAR1 family domain	R	General function prediction only ;
CAFS_HM_T_00021306	--	--	--
CAFS_HM_T_00082867	GTPase SAR1 family domain	R	General function prediction only ;
CAFS_HM_T_00013087	Leucine-rich repeat (LRR) protein	K	Transcription ;
CAFS_HM_T_00017900	Fermentation-respiration switch protein FrsA, has esterase activity, DUF1100 family	T	Signal transduction mechanisms ;
CAFS_HM_T_00022800	Serine protease inhibitor	O	Posttranslational modification, protein turnover, chaperones ;
CAFS_HM_T_00058389	Translation elongation factor EF-1alpha (GTPase)	J	Translation, ribosomal structure and biogenesis ;
CAFS_HM_T_00091439	Predicted component of the ribosome quality control (RQC) complex, YloA/Tae2 family, contains fibronectin-binding (FbpA) and DUF814 domains	J	Translation, ribosomal structure and biogenesis ;
CAFS_HM_T_00068695	NAD(P)-dependent dehydrogenase, short-chain alcohol dehydrogenase family	IQR	Lipid transport and metabolism ; Secondary metabolites biosynthesis, transport and catabolism ; General function prediction only ;
CAFS_HM_T_00074538	Alcohol dehydrogenase, class IV	C	Energy production and conversion ;
CAFS_HM_T_00039079	--	--	--
CAFS_HM_T_00014640	Tetratricopeptide (TPR) repeat	R	General function prediction only ;
CAFS_HM_T_00047035	NADH:ubiquinone oxidoreductase 27 kD subunit (chain C)	C	Energy production and conversion ;
CAFS_HM_T_00088538	NAD(P)-dependent dehydrogenase, short-chain alcohol dehydrogenase family	IQR	Lipid transport and metabolism ; Secondary metabolites biosynthesis, transport and catabolism ; General function prediction only ;
CAFS_HM_T_00032817	GTPase SAR1 family domain	R	General function prediction only ;
CAFS_HM_T_00029821	--	--	--
CAFS_HM_T_00080203	--	--	--
CAFS_HM_T_00020287	Actin-related protein	Z	Cytoskeleton ;
CAFS_HM_T_00057816	--	--	--
CAFS_HM_T_00042247	Ribonucleotide monophosphatase NagD, HAD superfamily	F	Nucleotide transport and metabolism ;
CAFS_HM_T_00035435	Diadenosine tetraphosphatase ApaH/serine/threonine protein phosphatase, PP2A family	T	Signal transduction mechanisms ;
CAFS_HM_T_00053649	Nicotinic acid phosphoribosyltransferase	H	Coenzyme transport and metabolism ;
CAFS_HM_T_00015695	--	--	--
CAFS_HM_T_00076451	--	--	--
CAFS_HM_T_00003605	--	--	--
CAFS_HM_T_00003706	Nicotinamidase-related amidase	HR	Coenzyme transport and metabolism ; General function prediction only ;
CAFS_HM_T_00070546	Actin-related protein	Z	Cytoskeleton ;
CAFS_HM_T_00054949	D-serine deaminase, pyridoxal phosphate-dependent	E	Amino acid transport and metabolism ;
CAFS_HM_T_00033384	Predicted kinase	R	General function prediction only ;
CAFS_HM_T_00015176	Glutamate or tyrosine decarboxylase or a related PLP-dependent protein	E	Amino acid transport and metabolism ;
CAFS_HM_T_00054614	--	--	--
CAFS_HM_T_00043065	Predicted O-methyltransferase YrrM	R	General function prediction only ;
CAFS_HM_T_00074014	RNA recognition motif (RRM) domain	J	Translation, ribosomal structure and biogenesis ;
CAFS_HM_T_00085760	GTPase SAR1 family domain	R	General function prediction only ;
CAFS_HM_T_00049725	--	--	--
CAFS_HM_T_00019174	Aldo/keto reductase, related to diketogulonate reductase	Q	Secondary metabolites biosynthesis, transport and catabolism ;
CAFS_HM_T_00028611	NAD(P)H-hydrate repair enzyme Nnr, NAD(P)H-hydrate dehydratase domain	F	Nucleotide transport and metabolism ;
CAFS_HM_T_00084097	Ribosomal protein L18E	J	Translation, ribosomal structure and biogenesis ;
CAFS_HM_T_00037007	Tetratricopeptide (TPR) repeat	R	General function prediction only ;
CAFS_HM_T_00064372	Methionine aminopeptidase	J	Translation, ribosomal structure and biogenesis ;
CAFS_HM_T_00003972	--	--	--
CAFS_HM_T_00059915	--	--	--
CAFS_HM_T_00048987	Adenine/guanine phosphoribosyltransferase or related PRPP-binding protein	F	Nucleotide transport and metabolism ;
CAFS_HM_T_00079390	Superfamily II DNA and RNA helicase	L	Replication, recombination and repair ;
CAFS_HM_T_00019817	Tetratricopeptide (TPR) repeat	R	General function prediction only ;
CAFS_HM_T_00065611	Serine/threonine protein kinase	T	Signal transduction mechanisms ;
CAFS_HM_T_00000978	--	--	--
CAFS_HM_T_00010635	Tetratricopeptide (TPR) repeat	R	General function prediction only ;
CAFS_HM_T_00029076	--	--	--
CAFS_HM_T_00001845	Thiamine kinase and related kinases	H	Coenzyme transport and metabolism ;
CAFS_HM_T_00074546	--	--	--
CAFS_HM_T_00075602	--	--	--
CAFS_HM_T_00069480	--	--	--
CAFS_HM_T_00090795	Cysteine protease, C1A family	O	Posttranslational modification, protein turnover, chaperones ;
CAFS_HM_T_00040868	Dipeptidyl aminopeptidase/acylaminoacyl peptidase	E	Amino acid transport and metabolism ;
CAFS_HM_T_00046350	--	--	--
CAFS_HM_T_00005053	Secreted trypsin-like serine protease	O	Posttranslational modification, protein turnover, chaperones ;
CAFS_HM_T_00045389	NAD(P)-dependent dehydrogenase, short-chain alcohol dehydrogenase family	IQR	Lipid transport and metabolism ; Secondary metabolites biosynthesis, transport and catabolism ; General function prediction only ;
CAFS_HM_T_00092126	Molybdenum cofactor biosynthesis enzyme MoaA	H	Coenzyme transport and metabolism ;
CAFS_HM_T_00010672	--	--	--
CAFS_HM_T_00041987	N-acetyl-beta-hexosaminidase	G	Carbohydrate transport and metabolism ;
CAFS_HM_T_00043831	--	--	--
CAFS_HM_T_00030696	3-hydroxyisobutyrate dehydrogenase or related beta-hydroxyacid dehydrogenase	I	Lipid transport and metabolism ;
CAFS_HM_T_00045121	--	--	--
CAFS_HM_T_00091427	Serine protease inhibitor	O	Posttranslational modification, protein turnover, chaperones ;
CAFS_HM_T_00035168	Predicted pyrophosphatase or phosphodiesterase, AlkP superfamily	R	General function prediction only ;
CAFS_HM_T_00031399	Secreted trypsin-like serine protease	O	Posttranslational modification, protein turnover, chaperones ;
CAFS_HM_T_00067649	--	--	--
CAFS_HM_T_00068577	Tetratricopeptide (TPR) repeat	R	General function prediction only ;
CAFS_HM_T_00002927	--	--	--
CAFS_HM_T_00007670	Glycosyltransferase, catalytic subunit of cellulose synthase and poly-beta-1,6-N-acetylglucosamine synthase	N	Cell motility ;
CAFS_HM_T_00026039	FoF1-type ATP synthase, gamma subunit	C	Energy production and conversion ;
CAFS_HM_T_00059280	NAD(P)-dependent dehydrogenase, short-chain alcohol dehydrogenase family	IQR	Lipid transport and metabolism ; Secondary metabolites biosynthesis, transport and catabolism ; General function prediction only ;
CAFS_HM_T_00046569	--	--	--
CAFS_HM_T_00015421	Ferritin	P	Inorganic ion transport and metabolism ;
CAFS_HM_T_00047131	Archaeal/vacuolar-type H+-ATPase subunit C/Vma6	C	Energy production and conversion ;
CAFS_HM_T_00070408	Predicted acylesterase/phospholipase RssA, containd patatin domain	R	General function prediction only ;
CAFS_HM_T_00041710	Serine/threonine protein kinase	T	Signal transduction mechanisms ;
CAFS_HM_T_00018700	Ca2+-binding protein, EF-hand superfamily	T	Signal transduction mechanisms ;
CAFS_HM_T_00052679	Protoheme ferro-lyase (ferrochelatase)	H	Coenzyme transport and metabolism ;
CAFS_HM_T_00022906	PASTA domain, binds beta-lactams	M	Cell wall/membrane/envelope biogenesis ;
CAFS_HM_T_00032493	20S proteasome, alpha and beta subunits	O	Posttranslational modification, protein turnover, chaperones ;
CAFS_HM_T_00024547	Aldo/keto reductase, related to diketogulonate reductase	Q	Secondary metabolites biosynthesis, transport and catabolism ;
CAFS_HM_T_00039641	--	--	--
CAFS_HM_T_00065545	RNA recognition motif (RRM) domain	J	Translation, ribosomal structure and biogenesis ;
CAFS_HM_T_00056166	Glutamate or tyrosine decarboxylase or a related PLP-dependent protein	E	Amino acid transport and metabolism ;
CAFS_HM_T_00089694	--	--	--
CAFS_HM_T_00013525	--	--	--
CAFS_HM_T_00077881	NDP-sugar pyrophosphorylase, includes eIF-2Bgamma, eIF-2Bepsilon, and LPS biosynthesis proteins	JM	Translation, ribosomal structure and biogenesis ; Cell wall/membrane/envelope biogenesis ;
CAFS_HM_T_00021849	Polyribonucleotide nucleotidyltransferase (polynucleotide phosphorylase)	J	Translation, ribosomal structure and biogenesis ;
CAFS_HM_T_00027527	16S rRNA C967 or C1407 C5-methylase, RsmB/RsmF family	J	Translation, ribosomal structure and biogenesis ;
CAFS_HM_T_00053043	Peroxiredoxin	O	Posttranslational modification, protein turnover, chaperones ;
CAFS_HM_T_00063402	Fermentation-respiration switch protein FrsA, has esterase activity, DUF1100 family	T	Signal transduction mechanisms ;
CAFS_HM_T_00070354	Uncharacterized conserved protein, contains DUF3084 domain	S	Function unknown ;
CAFS_HM_T_00066232	--	--	--
CAFS_HM_T_00063775	Outer membrane protein assembly factor BamA	M	Cell wall/membrane/envelope biogenesis ;
CAFS_HM_T_00006344	Ribonucleotide monophosphatase NagD, HAD superfamily	F	Nucleotide transport and metabolism ;
CAFS_HM_T_00077702	Ribosomal protein L30/L7E	J	Translation, ribosomal structure and biogenesis ;
CAFS_HM_T_00004455	Replication fork clamp-binding protein CrfC (dynamin-like GTPase family)	L	Replication, recombination and repair ;
CAFS_HM_T_00032885	--	--	--
CAFS_HM_T_00034255	Translation initiation factor 2, beta subunit (eIF-2beta)/eIF-5 N-terminal domain	J	Translation, ribosomal structure and biogenesis ;
CAFS_HM_T_00003170	Serine/threonine protein kinase	T	Signal transduction mechanisms ;
CAFS_HM_T_00026415	--	--	--
CAFS_HM_T_00061958	Malate/lactate dehydrogenase	C	Energy production and conversion ;
CAFS_HM_T_00034161	--	--	--
CAFS_HM_T_00013451	Ca2+-binding protein, EF-hand superfamily	T	Signal transduction mechanisms ;
CAFS_HM_T_00024495	Magnesium-transporting ATPase (P-type)	P	Inorganic ion transport and metabolism ;
CAFS_HM_T_00020445	Phytoene dehydrogenase-related protein	Q	Secondary metabolites biosynthesis, transport and catabolism ;
CAFS_HM_T_00032224	Cytochrome P450	QV	Secondary metabolites biosynthesis, transport and catabolism ; Defense mechanisms ;
CAFS_HM_T_00005244	Glycerol-3-phosphate cytidylyltransferase, cytidylyltransferase family	M	Cell wall/membrane/envelope biogenesis ;
CAFS_HM_T_00039904	--	--	--
CAFS_HM_T_00010878	--	--	--
CAFS_HM_T_00021569	N-acetyl-beta-hexosaminidase	G	Carbohydrate transport and metabolism ;
CAFS_HM_T_00074258	--	--	--
CAFS_HM_T_00085383	Glyoxylase or a related metal-dependent hydrolase, beta-lactamase superfamily II	R	General function prediction only ;
CAFS_HM_T_00015036	--	--	--
CAFS_HM_T_00046982	Molecular chaperone GrpE (heat shock protein)	O	Posttranslational modification, protein turnover, chaperones ;
CAFS_HM_T_00036296	DNA-directed RNA polymerase, beta' subunit/160 kD subunit	K	Transcription ;
CAFS_HM_T_00047133	Secreted trypsin-like serine protease	O	Posttranslational modification, protein turnover, chaperones ;
CAFS_HM_T_00088581	WD40 repeat	R	General function prediction only ;
CAFS_HM_T_00083596	--	--	--
CAFS_HM_T_00054826	--	--	--
CAFS_HM_T_00064294	Trehalose and maltose hydrolase (possible phosphorylase)	G	Carbohydrate transport and metabolism ;
CAFS_HM_T_00007105	Antitoxin component YwqK of the YwqJK toxin-antitoxin module	V	Defense mechanisms ;
CAFS_HM_T_00028762	--	--	--
CAFS_HM_T_00061847	--	--	--
CAFS_HM_T_00011832	Thiamine kinase and related kinases	H	Coenzyme transport and metabolism ;
CAFS_HM_T_00090088	Isopropylmalate/homocitrate/citramalate synthases	E	Amino acid transport and metabolism ;
CAFS_HM_T_00006023	WD40 repeat	R	General function prediction only ;
CAFS_HM_T_00047043	8-oxo-dGTP pyrophosphatase MutT and related house-cleaning NTP pyrophosphohydrolases, NUDIX family	V	Defense mechanisms ;
CAFS_HM_T_00052004	Ribosomal protein L22	J	Translation, ribosomal structure and biogenesis ;
CAFS_HM_T_00027220	GTPase SAR1 family domain	R	General function prediction only ;
CAFS_HM_T_00069122	Fermentation-respiration switch protein FrsA, has esterase activity, DUF1100 family	T	Signal transduction mechanisms ;
CAFS_HM_T_00065346	Predicted acylesterase/phospholipase RssA, containd patatin domain	R	General function prediction only ;
CAFS_HM_T_00029106	--	--	--
CAFS_HM_T_00052384	--	--	--
CAFS_HM_T_00084565	Secreted protein containing bacterial Ig-like domain and vWFA domain	R	General function prediction only ;
CAFS_HM_T_00068113	RNA recognition motif (RRM) domain	J	Translation, ribosomal structure and biogenesis ;
CAFS_HM_T_00085056	dsRNA-specific ribonuclease	K	Transcription ;
CAFS_HM_T_00004139	--	--	--
CAFS_HM_T_00037413	Cytochrome P450	QV	Secondary metabolites biosynthesis, transport and catabolism ; Defense mechanisms ;
CAFS_HM_T_00078168	Leucine-rich repeat (LRR) protein	K	Transcription ;
CAFS_HM_T_00036812	RNA recognition motif (RRM) domain	J	Translation, ribosomal structure and biogenesis ;
CAFS_HM_T_00014234	--	--	--
CAFS_HM_T_00021060	Isoaspartyl peptidase or L-asparaginase, Ntn-hydrolase superfamily	E	Amino acid transport and metabolism ;
CAFS_HM_T_00056409	--	--	--
CAFS_HM_T_00080530	--	--	--
CAFS_HM_T_00042308	Lysophospholipase, alpha-beta hydrolase superfamily	I	Lipid transport and metabolism ;
CAFS_HM_T_00067206	--	--	--
CAFS_HM_T_00069463	--	--	--
CAFS_HM_T_00045231	--	--	--
CAFS_HM_T_00030657	--	--	--
CAFS_HM_T_00051403	WD40 repeat	R	General function prediction only ;
CAFS_HM_T_00038958	cAMP-binding domain of CRP or a regulatory subunit of cAMP-dependent protein kinases	T	Signal transduction mechanisms ;
CAFS_HM_T_00046992	--	--	--
CAFS_HM_T_00039938	Predicted O-methyltransferase YrrM	R	General function prediction only ;
CAFS_HM_T_00042432	--	--	--
CAFS_HM_T_00065718	Regulator of protease activity HflC, stomatin/prohibitin superfamily	O	Posttranslational modification, protein turnover, chaperones ;
CAFS_HM_T_00081547	Glycosyltransferase, GT2 family	G	Carbohydrate transport and metabolism ;
CAFS_HM_T_00025402	--	--	--
CAFS_HM_T_00082878	Protein tyrosine phosphatase	T	Signal transduction mechanisms ;
CAFS_HM_T_00078295	--	--	--
CAFS_HM_T_00073880	Ubiquitin	O	Posttranslational modification, protein turnover, chaperones ;
CAFS_HM_T_00024484	Leucine-rich repeat (LRR) protein	K	Transcription ;
CAFS_HM_T_00005587	RNA recognition motif (RRM) domain	J	Translation, ribosomal structure and biogenesis ;
CAFS_HM_T_00049569	--	--	--
CAFS_HM_T_00065541	--	--	--
CAFS_HM_T_00009717	--	--	--
CAFS_HM_T_00011027	--	--	--
CAFS_HM_T_00070854	NAD(P)-dependent dehydrogenase, short-chain alcohol dehydrogenase family	IQR	Lipid transport and metabolism ; Secondary metabolites biosynthesis, transport and catabolism ; General function prediction only ;
CAFS_HM_T_00040325	Acyl CoA:acetate/3-ketoacid CoA transferase, beta subunit	I	Lipid transport and metabolism ;
CAFS_HM_T_00018545	--	--	--
CAFS_HM_T_00059636	--	--	--
CAFS_HM_T_00027779	RNA recognition motif (RRM) domain	J	Translation, ribosomal structure and biogenesis ;
CAFS_HM_T_00018111	--	--	--
CAFS_HM_T_00018176	Heme oxygenase	H	Coenzyme transport and metabolism ;
CAFS_HM_T_00030513	RNA recognition motif (RRM) domain	J	Translation, ribosomal structure and biogenesis ;
CAFS_HM_T_00053924	--	--	--
CAFS_HM_T_00047854	Ferritin	P	Inorganic ion transport and metabolism ;
CAFS_HM_T_00067223	Outer membrane protein assembly factor BamB, contains PQQ-like beta-propeller repeat	M	Cell wall/membrane/envelope biogenesis ;
CAFS_HM_T_00053536	Chitinase, GH18 family	G	Carbohydrate transport and metabolism ;
CAFS_HM_T_00082980	Negative regulator of GroEL, contains thioredoxin-like and TPR-like domains	O	Posttranslational modification, protein turnover, chaperones ;
CAFS_HM_T_00042865	cAMP-binding domain of CRP or a regulatory subunit of cAMP-dependent protein kinases	T	Signal transduction mechanisms ;
CAFS_HM_T_00033881	Protein-arginine kinase	O	Posttranslational modification, protein turnover, chaperones ;
CAFS_HM_T_00078356	6-phosphofructokinase	G	Carbohydrate transport and metabolism ;
CAFS_HM_T_00019209	--	--	--
CAFS_HM_T_00016866	--	--	--
CAFS_HM_T_00027144	--	--	--
CAFS_HM_T_00082066	--	--	--
CAFS_HM_T_00059556	TPP-dependent pyruvate or acetoin dehydrogenase subunit alpha	C	Energy production and conversion ;
CAFS_HM_T_00076939	GTPase SAR1 family domain	R	General function prediction only ;
CAFS_HM_T_00076942	ATP-dependent Zn proteases	O	Posttranslational modification, protein turnover, chaperones ;
CAFS_HM_T_00053960	RNA recognition motif (RRM) domain	J	Translation, ribosomal structure and biogenesis ;
CAFS_HM_T_00082416	Nicotinamidase-related amidase	HR	Coenzyme transport and metabolism ; General function prediction only ;
CAFS_HM_T_00030710	--	--	--
CAFS_HM_T_00085578	--	--	--
CAFS_HM_T_00030286	Triosephosphate isomerase	G	Carbohydrate transport and metabolism ;
CAFS_HM_T_00079159	Co-chaperonin GroES (HSP10)	O	Posttranslational modification, protein turnover, chaperones ;
CAFS_HM_T_00052588	RNA recognition motif (RRM) domain	J	Translation, ribosomal structure and biogenesis ;
CAFS_HM_T_00033155	--	--	--
CAFS_HM_T_00067316	Serine/threonine protein kinase	T	Signal transduction mechanisms ;
CAFS_HM_T_00092416	NADPH-dependent curcumin reductase CurA	QR	Secondary metabolites biosynthesis, transport and catabolism ; General function prediction only ;
CAFS_HM_T_00014693	6-phosphogluconolactonase/Glucosamine-6-phosphate isomerase/deaminase	G	Carbohydrate transport and metabolism ;
CAFS_HM_T_00013122	--	--	--
CAFS_HM_T_00081278	--	--	--
CAFS_HM_T_00090069	RNA recognition motif (RRM) domain	J	Translation, ribosomal structure and biogenesis ;
CAFS_HM_T_00028539	Translation initiation factor 1 (eIF-1/SUI1)	J	Translation, ribosomal structure and biogenesis ;
CAFS_HM_T_00021942	--	--	--
CAFS_HM_T_00052356	20S proteasome, alpha and beta subunits	O	Posttranslational modification, protein turnover, chaperones ;
CAFS_HM_T_00040341	Glutathione S-transferase	O	Posttranslational modification, protein turnover, chaperones ;
CAFS_HM_T_00043371	Periplasmic serine protease, S1-C subfamily, contain C-terminal PDZ domain	O	Posttranslational modification, protein turnover, chaperones ;
CAFS_HM_T_00065878	WD40 repeat	R	General function prediction only ;
CAFS_HM_T_00029332	Uncharacterized conserved protein, contains Zn-finger domain	S	Function unknown ;
CAFS_HM_T_00025437	Uncharacterized surface anchored protein	S	Function unknown ;
CAFS_HM_T_00022714	Pterin-4a-carbinolamine dehydratase	H	Coenzyme transport and metabolism ;
CAFS_HM_T_00036527	--	--	--
CAFS_HM_T_00020780	NADP-dependent 3-hydroxy acid dehydrogenase YdfG	C	Energy production and conversion ;
CAFS_HM_T_00074929	Pyruvate/2-oxoglutarate dehydrogenase complex, dihydrolipoamide acyltransferase (E2) component	C	Energy production and conversion ;
CAFS_HM_T_00027047	Molecular chaperone DnaK (HSP70)	O	Posttranslational modification, protein turnover, chaperones ;
CAFS_HM_T_00052702	Ribulose-5-phosphate 4-epimerase/Fuculose-1-phosphate aldolase	G	Carbohydrate transport and metabolism ;
CAFS_HM_T_00084153	Carboxypeptidase C (cathepsin A)	E	Amino acid transport and metabolism ;
CAFS_HM_T_00024181	Ribosomal protein S9	J	Translation, ribosomal structure and biogenesis ;
CAFS_HM_T_00029274	Superfamily II RNA helicase	L	Replication, recombination and repair ;
CAFS_HM_T_00036011	--	--	--
CAFS_HM_T_00070960	Exoribonuclease R	K	Transcription ;
CAFS_HM_T_00091423	--	--	--
CAFS_HM_T_00065362	RNA recognition motif (RRM) domain	J	Translation, ribosomal structure and biogenesis ;
CAFS_HM_T_00074590	--	--	--
CAFS_HM_T_00030374	20S proteasome, alpha and beta subunits	O	Posttranslational modification, protein turnover, chaperones ;
CAFS_HM_T_00050022	RNA recognition motif (RRM) domain	J	Translation, ribosomal structure and biogenesis ;
CAFS_HM_T_00080628	--	--	--
CAFS_HM_T_00029724	--	--	--
CAFS_HM_T_00034537	Predicted pyrophosphatase or phosphodiesterase, AlkP superfamily	R	General function prediction only ;
CAFS_HM_T_00072746	Ubiquitin	O	Posttranslational modification, protein turnover, chaperones ;
CAFS_HM_T_00090824	--	--	--
CAFS_HM_T_00077106	--	--	--
CAFS_HM_T_00001622	20S proteasome, alpha and beta subunits	O	Posttranslational modification, protein turnover, chaperones ;
CAFS_HM_T_00060888	Acetyl esterase/lipase	I	Lipid transport and metabolism ;
CAFS_HM_T_00057721	--	--	--
CAFS_HM_T_00059937	--	--	--
CAFS_HM_T_00047947	Xaa-Pro aminopeptidase	E	Amino acid transport and metabolism ;
CAFS_HM_T_00032980	--	--	--
CAFS_HM_T_00037535	6-phosphogluconolactonase/Glucosamine-6-phosphate isomerase/deaminase	G	Carbohydrate transport and metabolism ;
CAFS_HM_T_00091153	Tetratricopeptide (TPR) repeat	R	General function prediction only ;
CAFS_HM_T_00063456	--	--	--
CAFS_HM_T_00062261	PASTA domain, binds beta-lactams	M	Cell wall/membrane/envelope biogenesis ;
CAFS_HM_T_00003662	NDP-sugar pyrophosphorylase, includes eIF-2Bgamma, eIF-2Bepsilon, and LPS biosynthesis proteins	JM	Translation, ribosomal structure and biogenesis ; Cell wall/membrane/envelope biogenesis ;
CAFS_HM_T_00007790	DNA repair ATPase RecN	L	Replication, recombination and repair ;
CAFS_HM_T_00024561	--	--	--
CAFS_HM_T_00016607	--	--	--
CAFS_HM_T_00052068	Regulator of protease activity HflC, stomatin/prohibitin superfamily	O	Posttranslational modification, protein turnover, chaperones ;
CAFS_HM_T_00005949	Succinate dehydrogenase/fumarate reductase, Fe-S protein subunit	C	Energy production and conversion ;
CAFS_HM_T_00047334	GTPase SAR1 family domain	R	General function prediction only ;
CAFS_HM_T_00048033	--	--	--
CAFS_HM_T_00045513	--	--	--
CAFS_HM_T_00049501	Guanylate kinase	F	Nucleotide transport and metabolism ;
CAFS_HM_T_00033281	Replication fork clamp-binding protein CrfC (dynamin-like GTPase family)	L	Replication, recombination and repair ;
CAFS_HM_T_00008022	Acyl-CoA dehydrogenase related to the alkylation response protein AidB	I	Lipid transport and metabolism ;
CAFS_HM_T_00028769	Superfamily II DNA and RNA helicase	L	Replication, recombination and repair ;
CAFS_HM_T_00062028	NADPH-dependent 2,4-dienoyl-CoA reductase, sulfur reductase, or a related oxidoreductase	I	Lipid transport and metabolism ;
CAFS_HM_T_00004099	Dihydroorotase or related cyclic amidohydrolase	F	Nucleotide transport and metabolism ;
CAFS_HM_T_00064369	--	--	--
CAFS_HM_T_00077172	Acyl-CoA hydrolase	I	Lipid transport and metabolism ;
CAFS_HM_T_00043751	GTPase SAR1 family domain	R	General function prediction only ;
CAFS_HM_T_00071990	Uncharacterized conserved protein YfaS, alpha-2-macroglobulin family	R	General function prediction only ;
CAFS_HM_T_00084281	RNA recognition motif (RRM) domain	J	Translation, ribosomal structure and biogenesis ;
CAFS_HM_T_00061368	--	--	--
CAFS_HM_T_00075088	Short-chain dehydrogenase	R	General function prediction only ;
CAFS_HM_T_00067610	Diadenosine tetraphosphatase ApaH/serine/threonine protein phosphatase, PP2A family	T	Signal transduction mechanisms ;
CAFS_HM_T_00040135	--	--	--
CAFS_HM_T_00063598	UDP:flavonoid glycosyltransferase YjiC, YdhE family	G	Carbohydrate transport and metabolism ;
CAFS_HM_T_00042826	--	--	--
CAFS_HM_T_00086606	Ser/Thr protein kinase RdoA involved in Cpx stress response, MazF antagonist	T	Signal transduction mechanisms ;
CAFS_HM_T_00040046	--	--	--
CAFS_HM_T_00044825	ABC-type multidrug transport system, ATPase and permease component	V	Defense mechanisms ;
CAFS_HM_T_00039766	Monoamine oxidase	E	Amino acid transport and metabolism ;
CAFS_HM_T_00041816	--	--	--
CAFS_HM_T_00016837	--	--	--
CAFS_HM_T_00085450	--	--	--
CAFS_HM_T_00053735	Ubiquitin	O	Posttranslational modification, protein turnover, chaperones ;
CAFS_HM_T_00025198	Exonuclease III	L	Replication, recombination and repair ;
CAFS_HM_T_00085326	PASTA domain, binds beta-lactams	M	Cell wall/membrane/envelope biogenesis ;
CAFS_HM_T_00027887	Leucine-rich repeat (LRR) protein	K	Transcription ;
CAFS_HM_T_00075045	AAA+-type ATPase, SpoVK/Ycf46/Vps4 family	MDT	Cell wall/membrane/envelope biogenesis ; Cell cycle control, cell division, chromosome partitioning ; Signal transduction mechanisms ;
CAFS_HM_T_00043452	DNA-binding beta-propeller fold protein YncE	R	General function prediction only ;
CAFS_HM_T_00058804	Periplasmic TolA-binding protein (function unknown)	R	General function prediction only ;
CAFS_HM_T_00070369	1-acyl-sn-glycerol-3-phosphate acyltransferase	I	Lipid transport and metabolism ;
CAFS_HM_T_00046641	Large exoprotein involved in heme utilization or adhesion	U	Intracellular trafficking, secretion, and vesicular transport ;
CAFS_HM_T_00085228	Cell wall hydrolase CwlJ, involved in spore germination	DM	Cell cycle control, cell division, chromosome partitioning ; Cell wall/membrane/envelope biogenesis ;
CAFS_HM_T_00047649	--	--	--
CAFS_HM_T_00053842	--	--	--
CAFS_HM_T_00045002	Leucine-rich repeat (LRR) protein	K	Transcription ;
CAFS_HM_T_00004075	Ribosome-interacting GTPase 1	J	Translation, ribosomal structure and biogenesis ;
CAFS_HM_T_00046389	Protein tyrosine phosphatase	T	Signal transduction mechanisms ;
CAFS_HM_T_00021677	Glucose/arabinose dehydrogenase, beta-propeller fold	G	Carbohydrate transport and metabolism ;
CAFS_HM_T_00065207	--	--	--
CAFS_HM_T_00034712	Phosphoribosylpyrophosphate synthetase	FE	Nucleotide transport and metabolism ; Amino acid transport and metabolism ;
CAFS_HM_T_00064816	Mevalonate kinase	I	Lipid transport and metabolism ;
CAFS_HM_T_00034080	GDP-D-mannose dehydratase	M	Cell wall/membrane/envelope biogenesis ;
CAFS_HM_T_00032449	Translation initiation factor 2B subunit, eIF-2B alpha/beta/delta family	J	Translation, ribosomal structure and biogenesis ;
CAFS_HM_T_00009257	--	--	--
CAFS_HM_T_00016907	Uncharacterized protein, contains caspase domain	R	General function prediction only ;
CAFS_HM_T_00072126	--	--	--
CAFS_HM_T_00006848	Enoyl-CoA hydratase/carnithine racemase	I	Lipid transport and metabolism ;
CAFS_HM_T_00065390	tRNA/tmRNA/rRNA uracil-C5-methylase, TrmA/RlmC/RlmD family	J	Translation, ribosomal structure and biogenesis ;
CAFS_HM_T_00067281	--	--	--
CAFS_HM_T_00025217	Arylsulfatase A or related enzyme	P	Inorganic ion transport and metabolism ;
CAFS_HM_T_00060545	--	--	--
CAFS_HM_T_00019888	--	--	--
CAFS_HM_T_00003377	--	--	--
CAFS_HM_T_00045271	Predicted flavoprotein CzcO associated with the cation diffusion facilitator CzcD	P	Inorganic ion transport and metabolism ;
CAFS_HM_T_00011193	--	--	--
CAFS_HM_T_00055111	Acetyl esterase/lipase	I	Lipid transport and metabolism ;
CAFS_HM_T_00011866	--	--	--
CAFS_HM_T_00089762	Tryptophanyl-tRNA synthetase	J	Translation, ribosomal structure and biogenesis ;
CAFS_HM_T_00070596	Anion-transporting ATPase, ArsA/GET3 family	P	Inorganic ion transport and metabolism ;
CAFS_HM_T_00011060	Xaa-Pro aminopeptidase	E	Amino acid transport and metabolism ;
CAFS_HM_T_00045157	--	--	--
CAFS_HM_T_00012750	Predicted NTPase, NACHT family domain	T	Signal transduction mechanisms ;
CAFS_HM_T_00003318	Aminopeptidase N	E	Amino acid transport and metabolism ;
CAFS_HM_T_00019700	GTPase SAR1 family domain	R	General function prediction only ;
CAFS_HM_T_00013573	Membrane protein involved in colicin uptake	M	Cell wall/membrane/envelope biogenesis ;
CAFS_HM_T_00002760	--	--	--
CAFS_HM_T_00054609	Pyrroline-5-carboxylate reductase	E	Amino acid transport and metabolism ;
CAFS_HM_T_00058261	--	--	--
CAFS_HM_T_00022749	--	--	--
CAFS_HM_T_00058644	GTPase SAR1 family domain	R	General function prediction only ;
CAFS_HM_T_00068002	Phosphoribosylpyrophosphate synthetase	FE	Nucleotide transport and metabolism ; Amino acid transport and metabolism ;
CAFS_HM_T_00088432	Ferredoxin subunit of nitrite reductase or a ring-hydroxylating dioxygenase	PQ	Inorganic ion transport and metabolism ; Secondary metabolites biosynthesis, transport and catabolism ;
CAFS_HM_T_00077124	--	--	--
CAFS_HM_T_00042621	--	--	--
CAFS_HM_T_00049901	Ribosomal protein L7Ae or related RNA K-turn-binding protein	J	Translation, ribosomal structure and biogenesis ;
CAFS_HM_T_00060704	Dephospho-CoA kinase	H	Coenzyme transport and metabolism ;
CAFS_HM_T_00032931	Translation initiation factor 2, alpha subunit (eIF-2alpha)	J	Translation, ribosomal structure and biogenesis ;
CAFS_HM_T_00083745	--	--	--
CAFS_HM_T_00009572	Threonyl-tRNA synthetase	J	Translation, ribosomal structure and biogenesis ;
CAFS_HM_T_00013641	NAD(P)-dependent dehydrogenase, short-chain alcohol dehydrogenase family	IQR	Lipid transport and metabolism ; Secondary metabolites biosynthesis, transport and catabolism ; General function prediction only ;
CAFS_HM_T_00070380	--	--	--
CAFS_HM_T_00013438	Ca2+-binding protein, EF-hand superfamily	T	Signal transduction mechanisms ;
CAFS_HM_T_00041753	--	--	--
CAFS_HM_T_00013853	--	--	--
CAFS_HM_T_00083198	Secreted trypsin-like serine protease	O	Posttranslational modification, protein turnover, chaperones ;
CAFS_HM_T_00087305	20S proteasome, alpha and beta subunits	O	Posttranslational modification, protein turnover, chaperones ;
CAFS_HM_T_00078438	UDP:flavonoid glycosyltransferase YjiC, YdhE family	G	Carbohydrate transport and metabolism ;
CAFS_HM_T_00020216	--	--	--
CAFS_HM_T_00054448	Leucine-rich repeat (LRR) protein	K	Transcription ;
CAFS_HM_T_00091334	--	--	--
CAFS_HM_T_00055728	RNA recognition motif (RRM) domain	J	Translation, ribosomal structure and biogenesis ;
CAFS_HM_T_00030564	Chromosome segregation ATPase	D	Cell cycle control, cell division, chromosome partitioning ;
CAFS_HM_T_00035644	--	--	--
CAFS_HM_T_00022716	--	--	--
CAFS_HM_T_00022004	WD40 repeat	R	General function prediction only ;
CAFS_HM_T_00078360	--	--	--
CAFS_HM_T_00034579	O-Glycosyl hydrolase	M	Cell wall/membrane/envelope biogenesis ;
CAFS_HM_T_00071340	--	--	--
CAFS_HM_T_00057019	ATP-, maltotriose- and DNA-dependent transcriptional regulator MalT	K	Transcription ;
CAFS_HM_T_00083072	--	--	--
CAFS_HM_T_00014645	--	--	--
CAFS_HM_T_00049169	--	--	--
CAFS_HM_T_00007742	--	--	--
CAFS_HM_T_00008832	--	--	--
CAFS_HM_T_00075498	Archaeal fructose-1,6-bisphosphatase or related enzyme of inositol monophosphatase family	G	Carbohydrate transport and metabolism ;
CAFS_HM_T_00043559	Uncharacterized conserved protein YyaL, SSP411 family, contains thoiredoxin and six-hairpin glycosidase-like domains	R	General function prediction only ;
CAFS_HM_T_00050307	--	--	--
CAFS_HM_T_00081961	NADPH:quinone reductase or related Zn-dependent oxidoreductase	CR	Energy production and conversion ; General function prediction only ;
CAFS_HM_T_00082655	Inorganic pyrophosphatase/exopolyphosphatase	CP	Energy production and conversion ; Inorganic ion transport and metabolism ;
CAFS_HM_T_00069403	--	--	--
CAFS_HM_T_00017856	--	--	--
CAFS_HM_T_00017802	--	--	--
CAFS_HM_T_00027109	--	--	--
CAFS_HM_T_00021023	GTPase SAR1 family domain	R	General function prediction only ;
CAFS_HM_T_00064208	WD40 repeat	R	General function prediction only ;
CAFS_HM_T_00024122	--	--	--
CAFS_HM_T_00091939	--	--	--
CAFS_HM_T_00070651	--	--	--
CAFS_HM_T_00007115	--	--	--
CAFS_HM_T_00025311	8-oxo-dGTP pyrophosphatase MutT and related house-cleaning NTP pyrophosphohydrolases, NUDIX family	V	Defense mechanisms ;
CAFS_HM_T_00068116	Predicted ATPase	R	General function prediction only ;
CAFS_HM_T_00086451	Acyl-CoA dehydrogenase related to the alkylation response protein AidB	I	Lipid transport and metabolism ;
CAFS_HM_T_00028027	Predicted esterase	R	General function prediction only ;
CAFS_HM_T_00036986	Phenylpyruvate tautomerase PptA, 4-oxalocrotonate tautomerase family	Q	Secondary metabolites biosynthesis, transport and catabolism ;
CAFS_HM_T_00078889	--	--	--
CAFS_HM_T_00051523	Ribosomal protein S11	J	Translation, ribosomal structure and biogenesis ;
CAFS_HM_T_00075612	--	--	--
CAFS_HM_T_00044386	Uncharacterized protein	S	Function unknown ;
CAFS_HM_T_00078983	GTPase SAR1 family domain	R	General function prediction only ;
CAFS_HM_T_00088635	--	--	--
CAFS_HM_T_00065779	--	--	--
CAFS_HM_T_00059650	Fermentation-respiration switch protein FrsA, has esterase activity, DUF1100 family	T	Signal transduction mechanisms ;
CAFS_HM_T_00059643	Acyl-CoA hydrolase	I	Lipid transport and metabolism ;
CAFS_HM_T_00023041	--	--	--
CAFS_HM_T_00003521	--	--	--
CAFS_HM_T_00045376	IMP dehydrogenase/GMP reductase	F	Nucleotide transport and metabolism ;
CAFS_HM_T_00037896	Ribosomal protein S8E	J	Translation, ribosomal structure and biogenesis ;
CAFS_HM_T_00043116	Acyl-CoA dehydrogenase related to the alkylation response protein AidB	I	Lipid transport and metabolism ;
CAFS_HM_T_00010588	--	--	--
CAFS_HM_T_00013793	Replication fork clamp-binding protein CrfC (dynamin-like GTPase family)	L	Replication, recombination and repair ;
CAFS_HM_T_00030865	--	--	--
CAFS_HM_T_00035550	O-acetyl-ADP-ribose deacetylase (regulator of RNase III), contains Macro domain	J	Translation, ribosomal structure and biogenesis ;
CAFS_HM_T_00011481	GTPase SAR1 family domain	R	General function prediction only ;
CAFS_HM_T_00036156	--	--	--
CAFS_HM_T_00005460	--	--	--
CAFS_HM_T_00051736	Ribosomal protein L23	J	Translation, ribosomal structure and biogenesis ;
CAFS_HM_T_00061331	--	--	--
CAFS_HM_T_00003809	RNA recognition motif (RRM) domain	J	Translation, ribosomal structure and biogenesis ;
CAFS_HM_T_00045434	Leucine-rich repeat (LRR) protein	K	Transcription ;
CAFS_HM_T_00028506	--	--	--
CAFS_HM_T_00033205	--	--	--
CAFS_HM_T_00058016	Isocitrate/isopropylmalate dehydrogenase	CE	Energy production and conversion ; Amino acid transport and metabolism ;
CAFS_HM_T_00078874	Carbon monoxide dehydrogenase subunit G	C	Energy production and conversion ;
CAFS_HM_T_00079062	--	--	--
CAFS_HM_T_00029269	Neuraminidase (sialidase)	GM	Carbohydrate transport and metabolism ; Cell wall/membrane/envelope biogenesis ;
CAFS_HM_T_00075478	--	--	--
CAFS_HM_T_00019869	--	--	--
CAFS_HM_T_00064723	Hexokinase	G	Carbohydrate transport and metabolism ;
CAFS_HM_T_00069483	--	--	--
CAFS_HM_T_00058035	Adenosine deaminase	F	Nucleotide transport and metabolism ;
CAFS_HM_T_00015642	Tetratricopeptide (TPR) repeat	R	General function prediction only ;
CAFS_HM_T_00042095	--	--	--
CAFS_HM_T_00083132	--	--	--
CAFS_HM_T_00030063	--	--	--
CAFS_HM_T_00075413	Lipopolysaccharide biosynthesis protein, LPS:glycosyltransferase	M	Cell wall/membrane/envelope biogenesis ;
CAFS_HM_T_00031815	DNA gyrase inhibitor GyrI	L	Replication, recombination and repair ;
CAFS_HM_T_00033012	GTPase SAR1 family domain	R	General function prediction only ;
CAFS_HM_T_00064025	--	--	--
CAFS_HM_T_00082589	Glycerol-3-phosphate dehydrogenase	C	Energy production and conversion ;
CAFS_HM_T_00042046	--	--	--
CAFS_HM_T_00074519	Glyoxylase or a related metal-dependent hydrolase, beta-lactamase superfamily II	R	General function prediction only ;
CAFS_HM_T_00074129	Chromosome segregation ATPase	D	Cell cycle control, cell division, chromosome partitioning ;
CAFS_HM_T_00061271	--	--	--
CAFS_HM_T_00064318	Spore germination protein YaaH	D	Cell cycle control, cell division, chromosome partitioning ;
CAFS_HM_T_00046809	Ribosomal protein L13E	J	Translation, ribosomal structure and biogenesis ;
CAFS_HM_T_00062114	Alpha-mannosidase	G	Carbohydrate transport and metabolism ;
CAFS_HM_T_00069554	--	--	--
CAFS_HM_T_00074523	GTP-binding protein, GTP1/Obg family	R	General function prediction only ;
CAFS_HM_T_00072763	Beta-galactosidase GanA	G	Carbohydrate transport and metabolism ;
CAFS_HM_T_00011974	Serine protease, subtilase family	O	Posttranslational modification, protein turnover, chaperones ;
CAFS_HM_T_00085399	--	--	--
CAFS_HM_T_00059251	Serine/threonine protein kinase	T	Signal transduction mechanisms ;
CAFS_HM_T_00075301	GTPase SAR1 family domain	R	General function prediction only ;
CAFS_HM_T_00026802	Alpha-galactosidase	G	Carbohydrate transport and metabolism ;
CAFS_HM_T_00092266	--	--	--
CAFS_HM_T_00014881	RNA recognition motif (RRM) domain	J	Translation, ribosomal structure and biogenesis ;
CAFS_HM_T_00052115	Isocitrate/isopropylmalate dehydrogenase	CE	Energy production and conversion ; Amino acid transport and metabolism ;
CAFS_HM_T_00067746	Serine protease inhibitor	O	Posttranslational modification, protein turnover, chaperones ;
CAFS_HM_T_00013217	--	--	--
CAFS_HM_T_00028403	PASTA domain, binds beta-lactams	M	Cell wall/membrane/envelope biogenesis ;
CAFS_HM_T_00077299	--	--	--
CAFS_HM_T_00049002	ATP-dependent Zn proteases	O	Posttranslational modification, protein turnover, chaperones ;
CAFS_HM_T_00051621	--	--	--
CAFS_HM_T_00071997	Uncharacterized conserved protein YfaS, alpha-2-macroglobulin family	R	General function prediction only ;
CAFS_HM_T_00057818	Selenophosphate synthase	E	Amino acid transport and metabolism ;
CAFS_HM_T_00034062	Uncharacterized conserved protein, contains ATP-grasp and redox domains	S	Function unknown ;
CAFS_HM_T_00004427	Secreted trypsin-like serine protease	O	Posttranslational modification, protein turnover, chaperones ;
CAFS_HM_T_00085466	--	--	--
CAFS_HM_T_00045398	--	--	--
CAFS_HM_T_00091984	ADP-ribosylglycohydrolase	O	Posttranslational modification, protein turnover, chaperones ;
CAFS_HM_T_00009540	Acyl-CoA synthetase (AMP-forming)/AMP-acid ligase II	IQ	Lipid transport and metabolism ; Secondary metabolites biosynthesis, transport and catabolism ;
CAFS_HM_T_00062930	Archaeal ADP-dependent phosphofructokinase/glucokinase	G	Carbohydrate transport and metabolism ;
CAFS_HM_T_00013218	--	--	--
CAFS_HM_T_00012580	--	--	--
CAFS_HM_T_00047828	ATP-dependent protease Clp, ATPase subunit	O	Posttranslational modification, protein turnover, chaperones ;
CAFS_HM_T_00019822	Translation initiation factor 6 (eIF-6)	J	Translation, ribosomal structure and biogenesis ;
CAFS_HM_T_00015779	--	--	--
CAFS_HM_T_00052091	--	--	--
CAFS_HM_T_00028194	--	--	--
CAFS_HM_T_00031109	Nicotinic acid phosphoribosyltransferase	H	Coenzyme transport and metabolism ;
CAFS_HM_T_00059792	Guanine-nucleotide exchange factor, contains Sec7 domain	R	General function prediction only ;
CAFS_HM_T_00092107	Cell division protein FtsN	D	Cell cycle control, cell division, chromosome partitioning ;
CAFS_HM_T_00060556	--	--	--
CAFS_HM_T_00088951	--	--	--
CAFS_HM_T_00005939	GTPase SAR1 family domain	R	General function prediction only ;
CAFS_HM_T_00029017	DNA gyrase/topoisomerase IV, subunit B	L	Replication, recombination and repair ;
CAFS_HM_T_00052945	GTPase SAR1 family domain	R	General function prediction only ;
CAFS_HM_T_00004595	--	--	--
CAFS_HM_T_00033554	Superoxide dismutase	P	Inorganic ion transport and metabolism ;
CAFS_HM_T_00040812	Translation initiation factor 2, beta subunit (eIF-2beta)/eIF-5 N-terminal domain	J	Translation, ribosomal structure and biogenesis ;
CAFS_HM_T_00033991	Cytochrome P450	QV	Secondary metabolites biosynthesis, transport and catabolism ; Defense mechanisms ;
CAFS_HM_T_00080065	--	--	--
CAFS_HM_T_00076764	ATPase components of ABC transporters with duplicated ATPase domains	R	General function prediction only ;
CAFS_HM_T_00025026	--	--	--
CAFS_HM_T_00089687	GTP cyclohydrolase I	H	Coenzyme transport and metabolism ;
CAFS_HM_T_00074674	Tfp pilus assembly protein FimV	NW	Cell motility ; Extracellular structures ;
CAFS_HM_T_00034064	--	--	--
CAFS_HM_T_00056934	--	--	--
CAFS_HM_T_00065854	--	--	--
CAFS_HM_T_00011709	Cytochrome P450	QV	Secondary metabolites biosynthesis, transport and catabolism ; Defense mechanisms ;
CAFS_HM_T_00029710	Cysteine protease, C1A family	O	Posttranslational modification, protein turnover, chaperones ;
CAFS_HM_T_00027515	Superfamily II DNA and RNA helicase	L	Replication, recombination and repair ;
CAFS_HM_T_00027096	--	--	--
CAFS_HM_T_00082762	Alpha-tubulin suppressor and related RCC1 domain-containing proteins	DZ	Cell cycle control, cell division, chromosome partitioning ; Cytoskeleton ;
CAFS_HM_T_00013890	--	--	--
CAFS_HM_T_00001144	Superfamily II DNA and RNA helicase	L	Replication, recombination and repair ;
CAFS_HM_T_00074314	Membrane protein involved in colicin uptake	M	Cell wall/membrane/envelope biogenesis ;
CAFS_HM_T_00086450	--	--	--
CAFS_HM_T_00015448	RNA recognition motif (RRM) domain	J	Translation, ribosomal structure and biogenesis ;
CAFS_HM_T_00014612	RNA recognition motif (RRM) domain	J	Translation, ribosomal structure and biogenesis ;
CAFS_HM_T_00010684	Carboxylesterase type B	I	Lipid transport and metabolism ;
CAFS_HM_T_00073078	Putative periplasmic protein kinase ArgK or related GTPase of G3E family	O	Posttranslational modification, protein turnover, chaperones ;
CAFS_HM_T_00057233	Type V secretory pathway, adhesin AidA	MU	Cell wall/membrane/envelope biogenesis ; Intracellular trafficking, secretion, and vesicular transport ;
CAFS_HM_T_00078343	Actin-related protein	Z	Cytoskeleton ;
CAFS_HM_T_00010311	--	--	--
CAFS_HM_T_00040002	--	--	--
CAFS_HM_T_00015700	Glycosyltransferase involved in cell wall bisynthesis	M	Cell wall/membrane/envelope biogenesis ;
CAFS_HM_T_00006502	--	--	--
CAFS_HM_T_00024516	Uncharacterized conserved protein, contains a C-terminal beta-barrel porin domain	S	Function unknown ;
CAFS_HM_T_00065937	--	--	--
CAFS_HM_T_00005063	--	--	--
CAFS_HM_T_00020422	--	--	--
CAFS_HM_T_00016510	Cytochrome c2	C	Energy production and conversion ;
CAFS_HM_T_00061499	--	--	--
CAFS_HM_T_00084075	--	--	--
CAFS_HM_T_00072533	NADPH:quinone reductase or related Zn-dependent oxidoreductase	CR	Energy production and conversion ; General function prediction only ;
CAFS_HM_T_00036899	--	--	--
CAFS_HM_T_00026076	--	--	--
CAFS_HM_T_00054757	GTPase SAR1 family domain	R	General function prediction only ;
CAFS_HM_T_00063581	--	--	--
CAFS_HM_T_00087865	Uncaracterized surface protein containing fasciclin (FAS1) repeats	R	General function prediction only ;
CAFS_HM_T_00082216	16S rRNA C967 or C1407 C5-methylase, RsmB/RsmF family	J	Translation, ribosomal structure and biogenesis ;
CAFS_HM_T_00034327	--	--	--
CAFS_HM_T_00084358	Serine/threonine protein kinase	T	Signal transduction mechanisms ;
CAFS_HM_T_00039746	Acetyl-CoA carboxylase, carboxyltransferase component	I	Lipid transport and metabolism ;
CAFS_HM_T_00022543	Ribosomal protein S24E	J	Translation, ribosomal structure and biogenesis ;
CAFS_HM_T_00052672	--	--	--
CAFS_HM_T_00048834	--	--	--
CAFS_HM_T_00028163	Tat protein secretion system quality control protein TatD (DNase activity)	N	Cell motility ;
CAFS_HM_T_00011215	--	--	--
CAFS_HM_T_00056507	--	--	--
CAFS_HM_T_00028772	--	--	--
CAFS_HM_T_00027638	--	--	--
CAFS_HM_T_00074678	NDP-sugar pyrophosphorylase, includes eIF-2Bgamma, eIF-2Bepsilon, and LPS biosynthesis proteins	JM	Translation, ribosomal structure and biogenesis ; Cell wall/membrane/envelope biogenesis ;
CAFS_HM_T_00064123	Tfp pilus assembly protein FimV	NW	Cell motility ; Extracellular structures ;
CAFS_HM_T_00008575	Secreted/periplasmic Zn-dependent peptidases, insulinase-like	O	Posttranslational modification, protein turnover, chaperones ;
CAFS_HM_T_00053871	--	--	--
CAFS_HM_T_00053358	--	--	--
CAFS_HM_T_00045469	Ca2+-binding protein, EF-hand superfamily	T	Signal transduction mechanisms ;
CAFS_HM_T_00036835	Predicted ATPase	R	General function prediction only ;
CAFS_HM_T_00083157	Superfamily II DNA and RNA helicase	L	Replication, recombination and repair ;
CAFS_HM_T_00028625	--	--	--
CAFS_HM_T_00069163	Cytochrome P450	QV	Secondary metabolites biosynthesis, transport and catabolism ; Defense mechanisms ;
CAFS_HM_T_00082869	Uncharacterized conserved protein, contains Zn finger domain	S	Function unknown ;
CAFS_HM_T_00050818	--	--	--
CAFS_HM_T_00038172	GTPase SAR1 family domain	R	General function prediction only ;
CAFS_HM_T_00034902	--	--	--
CAFS_HM_T_00052121	Glutathione S-transferase	O	Posttranslational modification, protein turnover, chaperones ;
CAFS_HM_T_00073918	--	--	--
CAFS_HM_T_00040216	--	--	--
CAFS_HM_T_00049301	--	--	--
CAFS_HM_T_00076300	--	--	--
CAFS_HM_T_00048201	Carboxypeptidase C (cathepsin A)	E	Amino acid transport and metabolism ;
CAFS_HM_T_00009332	Beta-galactosidase GanA	G	Carbohydrate transport and metabolism ;
CAFS_HM_T_00059157	UDP:flavonoid glycosyltransferase YjiC, YdhE family	G	Carbohydrate transport and metabolism ;
CAFS_HM_T_00021549	Aminopeptidase N	E	Amino acid transport and metabolism ;
CAFS_HM_T_00040372	GTPase, G3E family	R	General function prediction only ;
CAFS_HM_T_00034325	FAD/FMN-containing dehydrogenase	C	Energy production and conversion ;
CAFS_HM_T_00081039	Enhancing lycopene biosynthesis protein 2	Q	Secondary metabolites biosynthesis, transport and catabolism ;
CAFS_HM_T_00036378	--	--	--
CAFS_HM_T_00013239	Endo-beta-N-acetylglucosaminidase D	G	Carbohydrate transport and metabolism ;
CAFS_HM_T_00023274	--	--	--
CAFS_HM_T_00045368	NADPH-dependent curcumin reductase CurA	QR	Secondary metabolites biosynthesis, transport and catabolism ; General function prediction only ;
CAFS_HM_T_00027634	Ribosomal protein L30E	J	Translation, ribosomal structure and biogenesis ;
CAFS_HM_T_00076952	Predicted exporter protein, RND superfamily	R	General function prediction only ;
CAFS_HM_T_00018460	--	--	--
CAFS_HM_T_00018748	Peptidyl-tRNA hydrolase	J	Translation, ribosomal structure and biogenesis ;
CAFS_HM_T_00009089	Zn-dependent amino- or carboxypeptidase, M28 family	O	Posttranslational modification, protein turnover, chaperones ;
CAFS_HM_T_00074135	GTPase SAR1 family domain	R	General function prediction only ;
CAFS_HM_T_00029894	--	--	--
CAFS_HM_T_00013227	--	--	--
CAFS_HM_T_00025150	Uncharacterized surface anchored protein	S	Function unknown ;
CAFS_HM_T_00057283	Glycosyltransferase, GT2 family	G	Carbohydrate transport and metabolism ;
CAFS_HM_T_00078043	--	--	--
CAFS_HM_T_00082332	Uridine phosphorylase	F	Nucleotide transport and metabolism ;
CAFS_HM_T_00004769	GTPase SAR1 family domain	R	General function prediction only ;
CAFS_HM_T_00084251	Predicted ATPase	R	General function prediction only ;
CAFS_HM_T_00021212	Catechol 2,3-dioxygenase or other lactoylglutathione lyase family enzyme	Q	Secondary metabolites biosynthesis, transport and catabolism ;
CAFS_HM_T_00069373	--	--	--
CAFS_HM_T_00061447	Tetratricopeptide (TPR) repeat	R	General function prediction only ;
CAFS_HM_T_00015597	Ribosomal protein S8	J	Translation, ribosomal structure and biogenesis ;
[truncated: 4,796 more rows]

## Sheet: KEGG_anno
KEGG annotation of total quantified proteins in liver.
Protein	KEGG_Description	KEGG_EC	KEGG_ko
CAFS_HM_T_00043379	fatty acid synthase, animal type	2.3.1.85	ko00061 Fatty acid biosynthesis ko01100 Metabolic pathways ko01212 Fatty acid metabolism ko04152 AMPK signaling pathway ko04910 Insulin signaling pathway
CAFS_HM_T_00033529	--	--	--
CAFS_HM_T_00052219	spectrin alpha	--	ko04210 Apoptosis
CAFS_HM_T_00091449	dynein heavy chain 1, cytosolic	--	ko04145 Phagosome ko04962 Vasopressin-regulated water reabsorption ko05132 Salmonella infection
CAFS_HM_T_00066111	Ras GTPase-activating-like protein IQGAP2/3	--	ko04810 Regulation of actin cytoskeleton
CAFS_HM_T_00056393	filamin	--	ko04010 MAPK signaling pathway ko04510 Focal adhesion ko05132 Salmonella infection ko05205 Proteoglycans in cancer
CAFS_HM_T_00065840	spectrin beta	--	--
CAFS_HM_T_00020544	glycogen phosphorylase	2.4.1.1	ko00500 Starch and sucrose metabolism ko01100 Metabolic pathways ko04217 Necroptosis ko04910 Insulin signaling pathway ko04922 Glucagon signaling pathway ko04931 Insulin resistance
CAFS_HM_T_00016615	myosin heavy chain	--	ko04530 Tight junction
CAFS_HM_T_00075212	--	--	ko00500 Starch and sucrose metabolism ko01100 Metabolic pathways
CAFS_HM_T_00006824	talin	--	ko04015 Rap1 signaling pathway ko04510 Focal adhesion ko04611 Platelet activation ko05166 HTLV-I infection
CAFS_HM_T_00007488	clathrin heavy chain	--	ko04142 Lysosome ko04144 Endocytosis ko04721 Synaptic vesicle cycle ko04961 Endocrine and other factor-regulated calcium reabsorption ko05016 Huntington's disease ko05100 Bacterial invasion of epithelial cells
CAFS_HM_T_00002604	myosin heavy chain	--	ko04530 Tight junction
CAFS_HM_T_00082002	plectin	--	--
CAFS_HM_T_00069903	complement component 3	--	ko04145 Phagosome ko04610 Complement and coagulation cascades ko05133 Pertussis ko05134 Legionellosis ko05140 Leishmaniasis ko05142 Chagas disease (American trypanosomiasis) ko05150 Staphylococcus aureus infection ko05152 Tuberculosis ko05167 Kaposi's sarcoma-associated herpesvirus infection ko05168 Herpes simplex infection ko05203 Viral carcinogenesis ko05322 Systemic lupus erythematosus
CAFS_HM_T_00016898	formyltetrahydrofolate dehydrogenase	1.5.1.6	ko00670 One carbon pool by folate
CAFS_HM_T_00020688	ribosome-binding protein 1	--	ko04141 Protein processing in endoplasmic reticulum
CAFS_HM_T_00018962	--	--	--
CAFS_HM_T_00091029	--	--	ko00670 One carbon pool by folate ko01100 Metabolic pathways
CAFS_HM_T_00077351	dihydropyrimidine dehydrogenase (NADP+)	1.3.1.2	ko00240 Pyrimidine metabolism ko00410 beta-Alanine metabolism ko00770 Pantothenate and CoA biosynthesis ko00983 Drug metabolism - other enzymes ko01100 Metabolic pathways
CAFS_HM_T_00008668	aldehyde oxidase	1.2.3.1	ko00280 Valine, leucine and isoleucine degradation ko00350 Tyrosine metabolism ko00380 Tryptophan metabolism ko00750 Vitamin B6 metabolism ko00760 Nicotinate and nicotinamide metabolism ko00830 Retinol metabolism ko00982 Drug metabolism - cytochrome P450 ko01100 Metabolic pathways ko04630 Jak-STAT signaling pathway
[truncated: 6,773 more rows]

## Sheet: IPR_anno
IPR annotation of total quantified proteins in liver.
Protein	IPR_Term
[truncated: 6,794 more rows]

## Sheet: Subcellular.localization_anno
Subcellular localization annotation of total quantified proteins in liver.
[truncated: 4,748 more rows]
