# Supplementary material for: Tandem Mass Tagging-Based Quantitative Proteomics Analysis Reveals Damage to the Liver and Brain of Hypophthalmichthys molitrix Exposed to Acute Hypoxia and Reoxygenation
Source: Antioxidants (Basel). 2022 Mar 19;11(3):589. doi: 10.3390/antiox11030589 (PMC8945220; doi:10.3390/antiox11030589)
Supplement: Supplementary file 1 [file antioxidants-11-00589-s001.zip › Table S5.xls]

## Sheet: GO_anno
GO annotation of total quantified proteins in brain.
Protein	GO_NUM	GO_Description
CAFS_HM_T_00091449	5	Molecular Function:microtubule motor activity (GO:0003777),Molecular Function:ATP binding (GO:0005524),Biological Process:microtubule-based movement (GO:0007018),Molecular Function:ATPase activity (GO:0016887),Cellular Component:dynein complex (GO:0030286)
CAFS_HM_T_00052219	2	Molecular Function:calcium ion binding (GO:0005509),Molecular Function:protein binding (GO:0005515)
CAFS_HM_T_00052961	1	Molecular Function:protein binding (GO:0005515)
CAFS_HM_T_00028830	2	Molecular Function:protein binding (GO:0005515),Cellular Component:cytoskeleton (GO:0005856)
CAFS_HM_T_00007488	5	Molecular Function:structural molecule activity (GO:0005198),Biological Process:intracellular protein transport (GO:0006886),Biological Process:vesicle-mediated transport (GO:0016192),Cellular Component:clathrin coat of trans-Golgi network vesicle (GO:0030130),Cellular Component:clathrin coat of coated pit (GO:0030132)
CAFS_HM_T_00086417	5	Molecular Function:structural molecule activity (GO:0005198),Biological Process:intracellular protein transport (GO:0006886),Biological Process:vesicle-mediated transport (GO:0016192),Cellular Component:clathrin coat of trans-Golgi network vesicle (GO:0030130),Cellular Component:clathrin coat of coated pit (GO:0030132)
CAFS_HM_T_00065840	1	Molecular Function:protein binding (GO:0005515)
CAFS_HM_T_00084393	2	Molecular Function:nucleotide binding (GO:0000166),Molecular Function:metal ion binding (GO:0046872)
CAFS_HM_T_00062319	--	--
CAFS_HM_T_00030340	2	Molecular Function:nucleotide binding (GO:0000166),Molecular Function:metal ion binding (GO:0046872)
CAFS_HM_T_00043379	2	Biological Process:biosynthetic process (GO:0009058),Biological Process:oxidation-reduction process (GO:0055114)
CAFS_HM_T_00079305	2	Molecular Function:nucleotide binding (GO:0000166),Molecular Function:metal ion binding (GO:0046872)
CAFS_HM_T_00071148	2	Molecular Function:nucleotide binding (GO:0000166),Molecular Function:metal ion binding (GO:0046872)
CAFS_HM_T_00053889	3	Molecular Function:ATP binding (GO:0005524),Biological Process:proton transport (GO:0015992),Biological Process:ATP metabolic process (GO:0046034)
CAFS_HM_T_00054151	1	Molecular Function:GTPase activity (GO:0003924)
CAFS_HM_T_00010561	1	Molecular Function:protein binding (GO:0005515)
CAFS_HM_T_00063456	5	Cellular Component:ruffle (GO:0001726),Molecular Function:actin binding (GO:0003779),Molecular Function:structural constituent of cytoskeleton (GO:0005200),Cellular Component:focal adhesion (GO:0005925),Biological Process:cytoskeletal anchoring at plasma membrane (GO:0007016)
CAFS_HM_T_00033881	1	Molecular Function:kinase activity (GO:0016301)
CAFS_HM_T_00057653	1	Molecular Function:GTPase activity (GO:0003924)
CAFS_HM_T_00079515	1	Molecular Function:GTPase activity (GO:0003924)
CAFS_HM_T_00052182	2	Biological Process:vesicle docking involved in exocytosis (GO:0006904),Biological Process:vesicle-mediated transport (GO:0016192)
CAFS_HM_T_00068134	--	--
CAFS_HM_T_00059705	3	Molecular Function:ATP binding (GO:0005524),Biological Process:proton transport (GO:0015992),Biological Process:ATP metabolic process (GO:0046034)
CAFS_HM_T_00047699	2	Biological Process:carbohydrate metabolic process (GO:0005975),Molecular Function:glycogen phosphorylase activity (GO:0008184)
CAFS_HM_T_00068886	3	Molecular Function:acetyl-CoA carboxylase activity (GO:0003989),Molecular Function:ATP binding (GO:0005524),Biological Process:fatty acid biosynthetic process (GO:0006633)
CAFS_HM_T_00067933	3	Molecular Function:ATP binding (GO:0005524),Biological Process:proton transport (GO:0015992),Biological Process:ATP metabolic process (GO:0046034)
CAFS_HM_T_00018469	4	Molecular Function:motor activity (GO:0003774),Molecular Function:protein binding (GO:0005515),Molecular Function:ATP binding (GO:0005524),Cellular Component:myosin complex (GO:0016459)
CAFS_HM_T_00090940	8	Molecular Function:nucleotide binding (GO:0000166),Molecular Function:aminoacyl-tRNA ligase activity (GO:0004812),Molecular Function:proline-tRNA ligase activity (GO:0004827),Molecular Function:ATP binding (GO:0005524),Cellular Component:cytoplasm (GO:0005737),Biological Process:tRNA aminoacylation for protein translation (GO:0006418),Biological Process:prolyl-tRNA aminoacylation (GO:0006433),Bio…
CAFS_HM_T_00088194	--	--
CAFS_HM_T_00079514	1	Molecular Function:GTPase activity (GO:0003924)
CAFS_HM_T_00073631	--	--
CAFS_HM_T_00056473	--	--
CAFS_HM_T_00004099	1	Molecular Function:hydrolase activity (GO:0016787)
CAFS_HM_T_00091877	2	Biological Process:carbohydrate metabolic process (GO:0005975),Molecular Function:glycogen phosphorylase activity (GO:0008184)
CAFS_HM_T_00000561	1	Molecular Function:GTPase activity (GO:0003924)
CAFS_HM_T_00002604	4	Molecular Function:motor activity (GO:0003774),Molecular Function:protein binding (GO:0005515),Molecular Function:ATP binding (GO:0005524),Cellular Component:myosin complex (GO:0016459)
CAFS_HM_T_00029551	3	Molecular Function:calcium ion binding (GO:0005509),Molecular Function:protein binding (GO:0005515),Molecular Function:microtubule binding (GO:0008017)
CAFS_HM_T_00058041	2	Molecular Function:GDP-dissociation inhibitor activity (GO:0005092),Biological Process:small GTPase mediated signal transduction (GO:0007264)
CAFS_HM_T_00075212	--	--
CAFS_HM_T_00069897	1	Molecular Function:GTPase activity (GO:0003924)
CAFS_HM_T_00026484	3	Molecular Function:protein binding (GO:0005515),Cellular Component:synapse (GO:0045202),Molecular Function:metal ion binding (GO:0046872)
CAFS_HM_T_00066674	4	Biological Process:intracellular protein transport (GO:0006886),Biological Process:vesicle-mediated transport (GO:0016192),Cellular Component:membrane coat (GO:0030117),Cellular Component:clathrin adaptor complex (GO:0030131)
CAFS_HM_T_00010536	4	Molecular Function:motor activity (GO:0003774),Molecular Function:protein binding (GO:0005515),Molecular Function:ATP binding (GO:0005524),Cellular Component:myosin complex (GO:0016459)
CAFS_HM_T_00051391	2	Molecular Function:phosphoglycerate kinase activity (GO:0004618),Biological Process:glycolytic process (GO:0006096)
CAFS_HM_T_00067028	2	Molecular Function:GTPase activity (GO:0003924),Molecular Function:GTP binding (GO:0005525)
CAFS_HM_T_00045771	--	--
CAFS_HM_T_00006824	4	Cellular Component:ruffle (GO:0001726),Molecular Function:structural constituent of cytoskeleton (GO:0005200),Cellular Component:focal adhesion (GO:0005925),Biological Process:cytoskeletal anchoring at plasma membrane (GO:0007016)
CAFS_HM_T_00021966	3	Molecular Function:calcium ion binding (GO:0005509),Molecular Function:protein binding (GO:0005515),Molecular Function:microtubule binding (GO:0008017)
CAFS_HM_T_00056689	1	Molecular Function:ubiquitin-protein transferase activity (GO:0004842)
CAFS_HM_T_00021076	2	Molecular Function:ATP binding (GO:0005524),Biological Process:carbohydrate metabolic process (GO:0005975)
CAFS_HM_T_00065957	1	Molecular Function:ATP binding (GO:0005524)
CAFS_HM_T_00032924	4	Molecular Function:ATP binding (GO:0005524),Biological Process:protein folding (GO:0006457),Biological Process:response to stress (GO:0006950),Molecular Function:unfolded protein binding (GO:0051082)
CAFS_HM_T_00048923	1	Molecular Function:protein binding (GO:0005515)
CAFS_HM_T_00069903	3	Molecular Function:endopeptidase inhibitor activity (GO:0004866),Cellular Component:extracellular region (GO:0005576),Cellular Component:extracellular space (GO:0005615)
CAFS_HM_T_00067579	3	Molecular Function:motor activity (GO:0003774),Molecular Function:ATP binding (GO:0005524),Cellular Component:myosin complex (GO:0016459)
CAFS_HM_T_00004114	3	Molecular Function:ATP binding (GO:0005524),Biological Process:proton transport (GO:0015992),Biological Process:ATP metabolic process (GO:0046034)
CAFS_HM_T_00082002	1	Cellular Component:cytoskeleton (GO:0005856)
CAFS_HM_T_00056393	1	Molecular Function:protein binding (GO:0005515)
CAFS_HM_T_00001368	--	--
CAFS_HM_T_00041092	1	Molecular Function:GTPase activity (GO:0003924)
CAFS_HM_T_00073543	1	Molecular Function:GTPase activity (GO:0003924)
CAFS_HM_T_00062741	2	Molecular Function:protein binding (GO:0005515),Cellular Component:membrane (GO:0016020)
CAFS_HM_T_00043863	1	Biological Process:metabolic process (GO:0008152)
CAFS_HM_T_00075979	1	Molecular Function:GTPase activity (GO:0003924)
CAFS_HM_T_00067645	2	Molecular Function:nucleotide binding (GO:0000166),Molecular Function:metal ion binding (GO:0046872)
CAFS_HM_T_00015632	3	Molecular Function:catalytic activity (GO:0003824),Biological Process:metabolic process (GO:0008152),Molecular Function:cofactor binding (GO:0048037)
CAFS_HM_T_00065215	1	Molecular Function:protein binding (GO:0005515)
CAFS_HM_T_00051111	1	Molecular Function:hydrolase activity (GO:0016787)
CAFS_HM_T_00057299	1	Molecular Function:small protein activating enzyme activity (GO:0008641)
CAFS_HM_T_00071147	2	Molecular Function:nucleotide binding (GO:0000166),Molecular Function:metal ion binding (GO:0046872)
CAFS_HM_T_00081042	--	--
CAFS_HM_T_00017527	--	--
CAFS_HM_T_00084104	3	Molecular Function:motor activity (GO:0003774),Molecular Function:ATP binding (GO:0005524),Cellular Component:myosin complex (GO:0016459)
CAFS_HM_T_00087005	2	Molecular Function:calcium ion binding (GO:0005509),Molecular Function:protein binding (GO:0005515)
CAFS_HM_T_00015397	4	Biological Process:intracellular protein transport (GO:0006886),Biological Process:vesicle-mediated transport (GO:0016192),Cellular Component:membrane coat (GO:0030117),Cellular Component:clathrin adaptor complex (GO:0030131)
CAFS_HM_T_00069913	3	Molecular Function:endopeptidase inhibitor activity (GO:0004866),Cellular Component:extracellular region (GO:0005576),Cellular Component:extracellular space (GO:0005615)
CAFS_HM_T_00076151	2	Molecular Function:GTPase activity (GO:0003924),Molecular Function:GTP binding (GO:0005525)
CAFS_HM_T_00013278	1	Molecular Function:ATP binding (GO:0005524)
CAFS_HM_T_00058972	--	--
CAFS_HM_T_00090042	1	Molecular Function:protein binding (GO:0005515)
CAFS_HM_T_00043022	4	Molecular Function:calcium channel activity (GO:0005262),Molecular Function:protein binding (GO:0005515),Cellular Component:membrane (GO:0016020),Biological Process:calcium ion transmembrane transport (GO:0070588)
CAFS_HM_T_00070234	2	Molecular Function:nucleotide binding (GO:0000166),Molecular Function:metal ion binding (GO:0046872)
CAFS_HM_T_00038448	1	Molecular Function:protein binding (GO:0005515)
CAFS_HM_T_00086975	--	--
CAFS_HM_T_00067593	3	Molecular Function:motor activity (GO:0003774),Molecular Function:ATP binding (GO:0005524),Cellular Component:myosin complex (GO:0016459)
CAFS_HM_T_00053565	3	Molecular Function:nucleotide binding (GO:0000166),Molecular Function:calcium-transporting ATPase activity (GO:0005388),Molecular Function:metal ion binding (GO:0046872)
CAFS_HM_T_00056411	1	Molecular Function:zinc ion binding (GO:0008270)
CAFS_HM_T_00038503	1	Molecular Function:hydrolase activity (GO:0016787)
CAFS_HM_T_00067332	2	Molecular Function:structural molecule activity (GO:0005198),Cellular Component:intermediate filament (GO:0005882)
CAFS_HM_T_00065858	3	Molecular Function:calcium ion binding (GO:0005509),Cellular Component:extracellular region (GO:0005576),Biological Process:cell-matrix adhesion (GO:0007160)
CAFS_HM_T_00040120	5	Molecular Function:structural molecule activity (GO:0005198),Biological Process:intracellular protein transport (GO:0006886),Biological Process:vesicle-mediated transport (GO:0016192),Cellular Component:clathrin coat of trans-Golgi network vesicle (GO:0030130),Cellular Component:clathrin coat of coated pit (GO:0030132)
CAFS_HM_T_00063233	3	Molecular Function:glucose-6-phosphate isomerase activity (GO:0004347),Biological Process:gluconeogenesis (GO:0006094),Biological Process:glycolytic process (GO:0006096)
CAFS_HM_T_00052531	4	Molecular Function:ATP binding (GO:0005524),Biological Process:ATP synthesis coupled proton transport (GO:0015986),Biological Process:proton transport (GO:0015992),Biological Process:ATP metabolic process (GO:0046034)
CAFS_HM_T_00048524	--	--
CAFS_HM_T_00050340	2	Molecular Function:structural molecule activity (GO:0005198),Cellular Component:intermediate filament (GO:0005882)
CAFS_HM_T_00004622	2	Molecular Function:oxidoreductase activity (GO:0016491),Biological Process:oxidation-reduction process (GO:0055114)
CAFS_HM_T_00033529	2	Molecular Function:lipid transporter activity (GO:0005319),Biological Process:lipid transport (GO:0006869)
CAFS_HM_T_00053188	6	Molecular Function:ion channel activity (GO:0005216),Molecular Function:calcium channel activity (GO:0005262),Biological Process:ion transport (GO:0006811),Cellular Component:membrane (GO:0016020),Biological Process:transmembrane transport (GO:0055085),Biological Process:calcium ion transmembrane transport (GO:0070588)
CAFS_HM_T_00036291	--	--
CAFS_HM_T_00074324	2	Molecular Function:6-phosphofructokinase activity (GO:0003872),Biological Process:glycolytic process (GO:0006096)
CAFS_HM_T_00026478	2	Molecular Function:GDP-dissociation inhibitor activity (GO:0005092),Biological Process:small GTPase mediated signal transduction (GO:0007264)
CAFS_HM_T_00042609	2	Molecular Function:protein binding (GO:0005515),Biological Process:signal transduction (GO:0007165)
CAFS_HM_T_00090276	3	Molecular Function:ATP binding (GO:0005524),Biological Process:proton transport (GO:0015992),Biological Process:ATP metabolic process (GO:0046034)
CAFS_HM_T_00028516	--	--
CAFS_HM_T_00068730	2	Molecular Function:GTPase activity (GO:0003924),Molecular Function:GTP binding (GO:0005525)
CAFS_HM_T_00060369	2	Molecular Function:6-phosphofructokinase activity (GO:0003872),Biological Process:glycolytic process (GO:0006096)
CAFS_HM_T_00040335	--	--
CAFS_HM_T_00010012	6	Molecular Function:nucleotide binding (GO:0000166),Molecular Function:nucleic acid binding (GO:0003676),Molecular Function:alanine-tRNA ligase activity (GO:0004813),Molecular Function:ATP binding (GO:0005524),Biological Process:alanyl-tRNA aminoacylation (GO:0006419),Biological Process:tRNA aminoacylation (GO:0043039)
CAFS_HM_T_00020784	--	--
CAFS_HM_T_00058095	1	Molecular Function:protein binding (GO:0005515)
CAFS_HM_T_00053119	--	--
CAFS_HM_T_00037540	--	--
CAFS_HM_T_00064928	1	Molecular Function:GTPase activity (GO:0003924)
CAFS_HM_T_00066950	3	Biological Process:metabolic process (GO:0008152),Molecular Function:oxidoreductase activity (GO:0016491),Biological Process:oxidation-reduction process (GO:0055114)
CAFS_HM_T_00016615	3	Molecular Function:motor activity (GO:0003774),Molecular Function:ATP binding (GO:0005524),Cellular Component:myosin complex (GO:0016459)
CAFS_HM_T_00028012	1	Molecular Function:GTP binding (GO:0005525)
CAFS_HM_T_00054400	3	Molecular Function:nucleotide binding (GO:0000166),Molecular Function:calcium-transporting ATPase activity (GO:0005388),Molecular Function:metal ion binding (GO:0046872)
CAFS_HM_T_00018279	3	Molecular Function:oxidoreductase activity (GO:0016491),Molecular Function:iron-sulfur cluster binding (GO:0051536),Biological Process:oxidation-reduction process (GO:0055114)
CAFS_HM_T_00050332	--	--
CAFS_HM_T_00085804	--	--
CAFS_HM_T_00092395	1	Molecular Function:hydrolase activity (GO:0016787)
CAFS_HM_T_00013725	2	Molecular Function:transaminase activity (GO:0008483),Molecular Function:pyridoxal phosphate binding (GO:0030170)
CAFS_HM_T_00090643	--	--
CAFS_HM_T_00017597	--	--
CAFS_HM_T_00071452	1	Molecular Function:hydrolase activity (GO:0016787)
CAFS_HM_T_00038054	3	Molecular Function:nucleotide binding (GO:0000166),Molecular Function:calcium-transporting ATPase activity (GO:0005388),Molecular Function:metal ion binding (GO:0046872)
CAFS_HM_T_00017862	2	Molecular Function:protein binding (GO:0005515),Molecular Function:lipid binding (GO:0008289)
CAFS_HM_T_00013519	2	Molecular Function:structural molecule activity (GO:0005198),Cellular Component:intermediate filament (GO:0005882)
CAFS_HM_T_00057900	3	Molecular Function:nucleotide binding (GO:0000166),Molecular Function:calcium-transporting ATPase activity (GO:0005388),Molecular Function:metal ion binding (GO:0046872)
CAFS_HM_T_00050160	1	Molecular Function:protein binding (GO:0005515)
CAFS_HM_T_00004402	1	Molecular Function:phosphoric ester hydrolase activity (GO:0042578)
CAFS_HM_T_00052088	2	Molecular Function:nucleotide binding (GO:0000166),Molecular Function:metal ion binding (GO:0046872)
CAFS_HM_T_00009810	1	Biological Process:oxidation-reduction process (GO:0055114)
CAFS_HM_T_00034064	2	Biological Process:protein targeting (GO:0006605),Biological Process:signal transduction (GO:0007165)
CAFS_HM_T_00057224	2	Molecular Function:structural molecule activity (GO:0005198),Cellular Component:intermediate filament (GO:0005882)
CAFS_HM_T_00050961	1	Molecular Function:protein binding (GO:0005515)
CAFS_HM_T_00026431	--	--
CAFS_HM_T_00066554	1	Molecular Function:protein binding (GO:0005515)
CAFS_HM_T_00031049	4	Molecular Function:ATP binding (GO:0005524),Biological Process:protein folding (GO:0006457),Biological Process:response to stress (GO:0006950),Molecular Function:unfolded protein binding (GO:0051082)
CAFS_HM_T_00037723	3	Biological Process:metabolic process (GO:0008152),Molecular Function:oxidoreductase activity (GO:0016491),Biological Process:oxidation-reduction process (GO:0055114)
CAFS_HM_T_00039192	1	Biological Process:metabolic process (GO:0008152)
CAFS_HM_T_00046845	1	Molecular Function:protein binding (GO:0005515)
CAFS_HM_T_00063619	1	Molecular Function:kinase activity (GO:0016301)
CAFS_HM_T_00001282	2	Molecular Function:nucleotide binding (GO:0000166),Molecular Function:metal ion binding (GO:0046872)
CAFS_HM_T_00088059	2	Molecular Function:fructose-bisphosphate aldolase activity (GO:0004332),Biological Process:glycolytic process (GO:0006096)
CAFS_HM_T_00088555	4	Molecular Function:RNA binding (GO:0003723),Molecular Function:protein binding (GO:0005515),Molecular Function:U6 snRNA binding (GO:0017070),Molecular Function:U5 snRNA binding (GO:0030623)
CAFS_HM_T_00080372	--	--
CAFS_HM_T_00022687	1	Molecular Function:GTP binding (GO:0005525)
CAFS_HM_T_00090889	6	Molecular Function:catalytic activity (GO:0003824),Molecular Function:3-hydroxyacyl-CoA dehydrogenase activity (GO:0003857),Biological Process:fatty acid metabolic process (GO:0006631),Biological Process:metabolic process (GO:0008152),Molecular Function:oxidoreductase activity (GO:0016491),Biological Process:oxidation-reduction process (GO:0055114)
CAFS_HM_T_00020271	1	Molecular Function:GTPase activity (GO:0003924)
CAFS_HM_T_00053808	2	Molecular Function:metallopeptidase activity (GO:0008237),Molecular Function:zinc ion binding (GO:0008270)
CAFS_HM_T_00082667	3	Biological Process:metabolic process (GO:0008152),Molecular Function:oxidoreductase activity (GO:0016491),Biological Process:oxidation-reduction process (GO:0055114)
CAFS_HM_T_00050289	2	Molecular Function:protein binding (GO:0005515),Biological Process:signal transduction (GO:0007165)
CAFS_HM_T_00038735	2	Molecular Function:nucleic acid binding (GO:0003676),Molecular Function:ATP binding (GO:0005524)
CAFS_HM_T_00035823	--	--
CAFS_HM_T_00038791	1	Molecular Function:GTPase activity (GO:0003924)
CAFS_HM_T_00065374	4	Biological Process:intracellular protein transport (GO:0006886),Biological Process:vesicle-mediated transport (GO:0016192),Cellular Component:membrane coat (GO:0030117),Cellular Component:clathrin adaptor complex (GO:0030131)
CAFS_HM_T_00078073	1	Molecular Function:protein binding (GO:0005515)
CAFS_HM_T_00025682	1	Molecular Function:ATP binding (GO:0005524)
CAFS_HM_T_00027947	1	Molecular Function:protein binding (GO:0005515)
CAFS_HM_T_00092212	--	--
CAFS_HM_T_00088307	3	Molecular Function:endopeptidase inhibitor activity (GO:0004866),Cellular Component:extracellular region (GO:0005576),Cellular Component:extracellular space (GO:0005615)
CAFS_HM_T_00047330	5	Cellular Component:ruffle (GO:0001726),Molecular Function:actin binding (GO:0003779),Molecular Function:structural constituent of cytoskeleton (GO:0005200),Cellular Component:focal adhesion (GO:0005925),Biological Process:cytoskeletal anchoring at plasma membrane (GO:0007016)
CAFS_HM_T_00023091	--	--
CAFS_HM_T_00049374	1	Molecular Function:ATP binding (GO:0005524)
CAFS_HM_T_00024495	3	Molecular Function:nucleotide binding (GO:0000166),Molecular Function:calcium-transporting ATPase activity (GO:0005388),Molecular Function:metal ion binding (GO:0046872)
CAFS_HM_T_00045148	--	--
CAFS_HM_T_00018962	1	Molecular Function:RNA binding (GO:0003723)
CAFS_HM_T_00045900	1	Molecular Function:ATP binding (GO:0005524)
CAFS_HM_T_00035230	1	Molecular Function:protein binding (GO:0005515)
CAFS_HM_T_00016782	1	Molecular Function:calcium ion binding (GO:0005509)
CAFS_HM_T_00030986	5	Molecular Function:phosphatidylinositol phospholipase C activity (GO:0004435),Molecular Function:protein binding (GO:0005515),Biological Process:lipid metabolic process (GO:0006629),Biological Process:signal transduction (GO:0007165),Biological Process:intracellular signal transduction (GO:0035556)
CAFS_HM_T_00061163	1	Molecular Function:ATP binding (GO:0005524)
CAFS_HM_T_00080493	1	Molecular Function:tubulin binding (GO:0015631)
CAFS_HM_T_00040871	3	Molecular Function:ionotropic glutamate receptor activity (GO:0004970),Molecular Function:extracellular-glutamate-gated ion channel activity (GO:0005234),Cellular Component:membrane (GO:0016020)
CAFS_HM_T_00027926	--	--
CAFS_HM_T_00061384	5	Molecular Function:actin binding (GO:0003779),Molecular Function:structural molecule activity (GO:0005198),Cellular Component:cytoskeleton (GO:0005856),Molecular Function:cytoskeletal protein binding (GO:0008092),Biological Process:cortical actin cytoskeleton organization (GO:0030866)
CAFS_HM_T_00015583	3	Molecular Function:protein binding (GO:0005515),Biological Process:protein deubiquitination (GO:0016579),Molecular Function:thiol-dependent ubiquitinyl hydrolase activity (GO:0036459)
CAFS_HM_T_00078434	3	Biological Process:metabolic process (GO:0008152),Molecular Function:NAD binding (GO:0051287),Biological Process:oxidation-reduction process (GO:0055114)
CAFS_HM_T_00063535	3	Molecular Function:oxidoreductase activity (GO:0016491),Biological Process:cell redox homeostasis (GO:0045454),Biological Process:oxidation-reduction process (GO:0055114)
CAFS_HM_T_00084314	2	Molecular Function:triose-phosphate isomerase activity (GO:0004807),Biological Process:metabolic process (GO:0008152)
CAFS_HM_T_00069911	3	Molecular Function:endopeptidase inhibitor activity (GO:0004866),Cellular Component:extracellular region (GO:0005576),Cellular Component:extracellular space (GO:0005615)
CAFS_HM_T_00022238	2	Biological Process:biosynthetic process (GO:0009058),Molecular Function:pyridoxal phosphate binding (GO:0030170)
CAFS_HM_T_00090319	4	Molecular Function:nucleotide binding (GO:0000166),Molecular Function:aminoacyl-tRNA ligase activity (GO:0004812),Molecular Function:ATP binding (GO:0005524),Biological Process:tRNA aminoacylation for protein translation (GO:0006418)
CAFS_HM_T_00085296	1	Biological Process:oxidation-reduction process (GO:0055114)
CAFS_HM_T_00021153	--	--
CAFS_HM_T_00019248	--	--
CAFS_HM_T_00013914	1	Biological Process:oxidation-reduction process (GO:0055114)
CAFS_HM_T_00007376	1	Molecular Function:ATP binding (GO:0005524)
CAFS_HM_T_00073250	1	Molecular Function:ATP binding (GO:0005524)
CAFS_HM_T_00062281	2	Molecular Function:GTPase activity (GO:0003924),Molecular Function:GTP binding (GO:0005525)
CAFS_HM_T_00023205	1	Molecular Function:kinase activity (GO:0016301)
CAFS_HM_T_00043112	2	Biological Process:tricarboxylic acid cycle (GO:0006099),Molecular Function:lyase activity (GO:0016829)
CAFS_HM_T_00044195	--	--
CAFS_HM_T_00075602	1	Biological Process:ATP hydrolysis coupled proton transport (GO:0015991)
CAFS_HM_T_00008033	1	Molecular Function:GTPase activity (GO:0003924)
CAFS_HM_T_00058936	2	Molecular Function:structural molecule activity (GO:0005198),Cellular Component:intermediate filament (GO:0005882)
CAFS_HM_T_00005387	--	--
CAFS_HM_T_00063958	--	--
CAFS_HM_T_00078997	1	Biological Process:oxidation-reduction process (GO:0055114)
CAFS_HM_T_00071290	1	Molecular Function:actin filament binding (GO:0051015)
CAFS_HM_T_00051134	--	--
CAFS_HM_T_00044925	--	--
CAFS_HM_T_00088295	3	Molecular Function:endopeptidase inhibitor activity (GO:0004866),Cellular Component:extracellular region (GO:0005576),Cellular Component:extracellular space (GO:0005615)
CAFS_HM_T_00043005	2	Biological Process:cell adhesion (GO:0007155),Molecular Function:actin filament binding (GO:0051015)
CAFS_HM_T_00019920	5	Molecular Function:transporter activity (GO:0005215),Biological Process:transport (GO:0006810),Biological Process:ion transport (GO:0006811),Cellular Component:membrane (GO:0016020),Biological Process:transmembrane transport (GO:0055085)
CAFS_HM_T_00069365	--	--
CAFS_HM_T_00051077	2	Cellular Component:mitochondrial outer membrane (GO:0005741),Biological Process:transmembrane transport (GO:0055085)
CAFS_HM_T_00078356	2	Molecular Function:6-phosphofructokinase activity (GO:0003872),Biological Process:glycolytic process (GO:0006096)
CAFS_HM_T_00018366	2	Molecular Function:catalytic activity (GO:0003824),Biological Process:metabolic process (GO:0008152)
CAFS_HM_T_00017743	4	Molecular Function:protein-arginine deiminase activity (GO:0004668),Molecular Function:calcium ion binding (GO:0005509),Cellular Component:cytoplasm (GO:0005737),Biological Process:protein citrullination (GO:0018101)
CAFS_HM_T_00020610	2	Molecular Function:calcium ion binding (GO:0005509),Molecular Function:protein binding (GO:0005515)
CAFS_HM_T_00031328	--	--
CAFS_HM_T_00040130	2	Cellular Component:mitochondrial outer membrane (GO:0005741),Biological Process:transmembrane transport (GO:0055085)
CAFS_HM_T_00087268	1	Molecular Function:protein binding (GO:0005515)
CAFS_HM_T_00056880	--	--
CAFS_HM_T_00048208	2	Biological Process:biosynthetic process (GO:0009058),Molecular Function:pyridoxal phosphate binding (GO:0030170)
CAFS_HM_T_00069909	1	Molecular Function:endopeptidase inhibitor activity (GO:0004866)
CAFS_HM_T_00016137	3	Molecular Function:aminopeptidase activity (GO:0004177),Cellular Component:intracellular (GO:0005622),Biological Process:proteolysis (GO:0006508)
CAFS_HM_T_00070051	1	Molecular Function:ATP binding (GO:0005524)
CAFS_HM_T_00026989	1	Molecular Function:phospholipid binding (GO:0005543)
CAFS_HM_T_00043160	1	Molecular Function:hydrolase activity (GO:0016787)
CAFS_HM_T_00008957	2	Molecular Function:structural molecule activity (GO:0005198),Cellular Component:intermediate filament (GO:0005882)
CAFS_HM_T_00040194	2	Molecular Function:structural molecule activity (GO:0005198),Cellular Component:intermediate filament (GO:0005882)
CAFS_HM_T_00023239	2	Cellular Component:mitochondrial outer membrane (GO:0005741),Biological Process:transmembrane transport (GO:0055085)
CAFS_HM_T_00008334	--	--
CAFS_HM_T_00040139	1	Biological Process:metabolic process (GO:0008152)
CAFS_HM_T_00054471	2	Molecular Function:6-phosphofructokinase activity (GO:0003872),Biological Process:glycolytic process (GO:0006096)
CAFS_HM_T_00018993	1	Molecular Function:protein binding (GO:0005515)
CAFS_HM_T_00037464	--	--
CAFS_HM_T_00019121	1	Biological Process:carbohydrate metabolic process (GO:0005975)
CAFS_HM_T_00046525	1	Biological Process:metabolic process (GO:0008152)
CAFS_HM_T_00022789	--	--
CAFS_HM_T_00041509	4	Molecular Function:microtubule motor activity (GO:0003777),Molecular Function:ATP binding (GO:0005524),Biological Process:microtubule-based movement (GO:0007018),Molecular Function:microtubule binding (GO:0008017)
CAFS_HM_T_00061073	4	Molecular Function:nucleotide binding (GO:0000166),Molecular Function:aminoacyl-tRNA ligase activity (GO:0004812),Molecular Function:ATP binding (GO:0005524),Biological Process:tRNA aminoacylation for protein translation (GO:0006418)
CAFS_HM_T_00088449	--	--
CAFS_HM_T_00090971	--	--
CAFS_HM_T_00047991	--	--
CAFS_HM_T_00054411	4	Molecular Function:nucleotide binding (GO:0000166),Molecular Function:aminoacyl-tRNA ligase activity (GO:0004812),Molecular Function:ATP binding (GO:0005524),Biological Process:tRNA aminoacylation for protein translation (GO:0006418)
CAFS_HM_T_00068438	--	--
CAFS_HM_T_00024966	1	Molecular Function:hydrolase activity (GO:0016787)
CAFS_HM_T_00049415	5	Molecular Function:protein kinase activity (GO:0004672),Molecular Function:calmodulin-dependent protein kinase activity (GO:0004683),Molecular Function:calmodulin binding (GO:0005516),Molecular Function:ATP binding (GO:0005524),Biological Process:protein phosphorylation (GO:0006468)
CAFS_HM_T_00071979	3	Molecular Function:endopeptidase inhibitor activity (GO:0004866),Cellular Component:extracellular region (GO:0005576),Cellular Component:extracellular space (GO:0005615)
CAFS_HM_T_00030402	2	Molecular Function:oxidoreductase activity (GO:0016491),Biological Process:oxidation-reduction process (GO:0055114)
CAFS_HM_T_00086550	1	Molecular Function:protein binding (GO:0005515)
CAFS_HM_T_00051644	2	Biological Process:carbohydrate metabolic process (GO:0005975),Molecular Function:glycogen phosphorylase activity (GO:0008184)
CAFS_HM_T_00017958	1	Molecular Function:protein binding (GO:0005515)
CAFS_HM_T_00017092	5	Molecular Function:microtubule motor activity (GO:0003777),Molecular Function:protein binding (GO:0005515),Molecular Function:ATP binding (GO:0005524),Biological Process:microtubule-based movement (GO:0007018),Molecular Function:microtubule binding (GO:0008017)
CAFS_HM_T_00039858	2	Molecular Function:nucleotide binding (GO:0000166),Molecular Function:metal ion binding (GO:0046872)
CAFS_HM_T_00068065	3	Cellular Component:cytoplasm (GO:0005737),Molecular Function:cytoskeletal protein binding (GO:0008092),Cellular Component:extrinsic component of membrane (GO:0019898)
CAFS_HM_T_00064188	3	Biological Process:intracellular protein transport (GO:0006886),Biological Process:vesicle-mediated transport (GO:0016192),Cellular Component:membrane coat (GO:0030117)
CAFS_HM_T_00062493	--	--
CAFS_HM_T_00060269	3	Molecular Function:carboxy-lyase activity (GO:0016831),Biological Process:carboxylic acid metabolic process (GO:0019752),Molecular Function:pyridoxal phosphate binding (GO:0030170)
CAFS_HM_T_00031519	5	Molecular Function:ATP binding (GO:0005524),Biological Process:cellular amino acid metabolic process (GO:0006520),Molecular Function:amino acid binding (GO:0016597),Molecular Function:carboxyl- or carbamoyltransferase activity (GO:0016743),Molecular Function:hydrolase activity (GO:0016787)
CAFS_HM_T_00058446	1	Molecular Function:ATP binding (GO:0005524)
CAFS_HM_T_00025415	4	Molecular Function:ATP binding (GO:0005524),Biological Process:protein folding (GO:0006457),Biological Process:response to stress (GO:0006950),Molecular Function:unfolded protein binding (GO:0051082)
CAFS_HM_T_00081146	--	--
CAFS_HM_T_00075861	6	Molecular Function:structural molecule activity (GO:0005198),Molecular Function:protein binding (GO:0005515),Biological Process:intracellular protein transport (GO:0006886),Biological Process:vesicle-mediated transport (GO:0016192),Cellular Component:membrane coat (GO:0030117),Cellular Component:COPI vesicle coat (GO:0030126)
CAFS_HM_T_00073215	1	Molecular Function:GTP binding (GO:0005525)
CAFS_HM_T_00005452	5	Biological Process:intracellular protein transport (GO:0006886),Biological Process:protein transport (GO:0015031),Biological Process:vesicle-mediated transport (GO:0016192),Cellular Component:membrane coat (GO:0030117),Cellular Component:AP-3 adaptor complex (GO:0030123)
CAFS_HM_T_00001942	2	Molecular Function:symporter activity (GO:0015293),Cellular Component:integral component of membrane (GO:0016021)
CAFS_HM_T_00046103	3	Molecular Function:quinone binding (GO:0048038),Molecular Function:NAD binding (GO:0051287),Biological Process:oxidation-reduction process (GO:0055114)
CAFS_HM_T_00004827	1	Biological Process:metabolic process (GO:0008152)
CAFS_HM_T_00058541	1	Molecular Function:protein binding (GO:0005515)
CAFS_HM_T_00068473	3	Biological Process:anion transport (GO:0006820),Molecular Function:anion transmembrane transporter activity (GO:0008509),Cellular Component:integral component of membrane (GO:0016021)
CAFS_HM_T_00090285	--	--
CAFS_HM_T_00033005	6	Molecular Function:catalytic activity (GO:0003824),Molecular Function:3-hydroxyacyl-CoA dehydrogenase activity (GO:0003857),Biological Process:fatty acid metabolic process (GO:0006631),Biological Process:metabolic process (GO:0008152),Molecular Function:oxidoreductase activity (GO:0016491),Biological Process:oxidation-reduction process (GO:0055114)
CAFS_HM_T_00070004	2	Cellular Component:exosome (RNase complex) (GO:0000178),Molecular Function:RNA binding (GO:0003723)
CAFS_HM_T_00051204	4	Molecular Function:nucleotide binding (GO:0000166),Molecular Function:aminoacyl-tRNA ligase activity (GO:0004812),Molecular Function:ATP binding (GO:0005524),Biological Process:tRNA aminoacylation for protein translation (GO:0006418)
CAFS_HM_T_00014583	2	Molecular Function:oxygen binding (GO:0019825),Molecular Function:heme binding (GO:0020037)
CAFS_HM_T_00082983	1	Molecular Function:ATP binding (GO:0005524)
CAFS_HM_T_00041710	5	Molecular Function:protein kinase activity (GO:0004672),Molecular Function:calmodulin-dependent protein kinase activity (GO:0004683),Molecular Function:calmodulin binding (GO:0005516),Molecular Function:ATP binding (GO:0005524),Biological Process:protein phosphorylation (GO:0006468)
CAFS_HM_T_00005877	--	--
CAFS_HM_T_00020216	--	--
CAFS_HM_T_00084406	4	Molecular Function:nucleotide binding (GO:0000166),Molecular Function:aminoacyl-tRNA ligase activity (GO:0004812),Molecular Function:ATP binding (GO:0005524),Biological Process:tRNA aminoacylation for protein translation (GO:0006418)
CAFS_HM_T_00073708	5	Molecular Function:receptor binding (GO:0005102),Cellular Component:fibrinogen complex (GO:0005577),Biological Process:signal transduction (GO:0007165),Biological Process:platelet activation (GO:0030168),Biological Process:protein polymerization (GO:0051258)
CAFS_HM_T_00035874	1	Molecular Function:GTP binding (GO:0005525)
CAFS_HM_T_00062527	--	--
CAFS_HM_T_00017684	1	Molecular Function:protein binding (GO:0005515)
CAFS_HM_T_00030291	2	Molecular Function:protein binding (GO:0005515),Cellular Component:membrane (GO:0016020)
CAFS_HM_T_00037368	2	Molecular Function:actin binding (GO:0003779),Cellular Component:intracellular (GO:0005622)
CAFS_HM_T_00023031	1	Molecular Function:protein binding (GO:0005515)
CAFS_HM_T_00091403	--	--
CAFS_HM_T_00012722	--	--
CAFS_HM_T_00077112	2	Molecular Function:calcium ion binding (GO:0005509),Molecular Function:calcium-dependent phospholipid binding (GO:0005544)
CAFS_HM_T_00027074	4	Biological Process:metabolic process (GO:0008152),Biological Process:biosynthetic process (GO:0009058),Molecular Function:oxidoreductase activity (GO:0016491),Biological Process:oxidation-reduction process (GO:0055114)
CAFS_HM_T_00086964	3	Biological Process:cell communication (GO:0007154),Cellular Component:integral component of membrane (GO:0016021),Biological Process:transmembrane transport (GO:0055085)
CAFS_HM_T_00003217	1	Biological Process:metabolic process (GO:0008152)
CAFS_HM_T_00060176	2	Molecular Function:hydrogen ion transmembrane transporter activity (GO:0015078),Biological Process:ATP hydrolysis coupled proton transport (GO:0015991)
CAFS_HM_T_00060246	2	Molecular Function:calcium ion binding (GO:0005509),Molecular Function:calcium-dependent phospholipid binding (GO:0005544)
CAFS_HM_T_00087431	--	--
CAFS_HM_T_00076524	1	Biological Process:proteolysis (GO:0006508)
CAFS_HM_T_00005819	2	Molecular Function:glutaminase activity (GO:0004359),Biological Process:glutamine metabolic process (GO:0006541)
CAFS_HM_T_00039442	1	Molecular Function:protein binding (GO:0005515)
CAFS_HM_T_00089108	--	--
CAFS_HM_T_00029945	1	Molecular Function:nucleic acid binding (GO:0003676)
CAFS_HM_T_00052702	--	--
CAFS_HM_T_00031810	1	Biological Process:metabolic process (GO:0008152)
CAFS_HM_T_00054153	2	Molecular Function:structural molecule activity (GO:0005198),Cellular Component:intermediate filament (GO:0005882)
CAFS_HM_T_00054669	3	Biological Process:metabolic process (GO:0008152),Molecular Function:oxidoreductase activity (GO:0016491),Biological Process:oxidation-reduction process (GO:0055114)
CAFS_HM_T_00026406	1	Molecular Function:protein binding (GO:0005515)
CAFS_HM_T_00026326	5	Molecular Function:structural molecule activity (GO:0005198),Biological Process:intracellular protein transport (GO:0006886),Biological Process:vesicle-mediated transport (GO:0016192),Cellular Component:membrane coat (GO:0030117),Cellular Component:COPI vesicle coat (GO:0030126)
CAFS_HM_T_00051701	1	Molecular Function:catalytic activity (GO:0003824)
CAFS_HM_T_00047396	5	Molecular Function:structural molecule activity (GO:0005198),Biological Process:intracellular protein transport (GO:0006886),Biological Process:vesicle-mediated transport (GO:0016192),Cellular Component:membrane coat (GO:0030117),Cellular Component:COPI vesicle coat (GO:0030126)
CAFS_HM_T_00004557	--	--
CAFS_HM_T_00056703	1	Molecular Function:protein binding (GO:0005515)
CAFS_HM_T_00053449	4	Molecular Function:acyl-CoA dehydrogenase activity (GO:0003995),Biological Process:metabolic process (GO:0008152),Molecular Function:flavin adenine dinucleotide binding (GO:0050660),Biological Process:oxidation-reduction process (GO:0055114)
CAFS_HM_T_00088163	1	Molecular Function:protein binding (GO:0005515)
CAFS_HM_T_00013630	1	Molecular Function:protein binding (GO:0005515)
CAFS_HM_T_00073577	1	Molecular Function:protein binding (GO:0005515)
CAFS_HM_T_00073195	2	Molecular Function:structural molecule activity (GO:0005198),Cellular Component:intermediate filament (GO:0005882)
CAFS_HM_T_00092258	3	Biological Process:metabolic process (GO:0008152),Molecular Function:oxidoreductase activity (GO:0016491),Biological Process:oxidation-reduction process (GO:0055114)
CAFS_HM_T_00014742	1	Molecular Function:GTP binding (GO:0005525)
CAFS_HM_T_00076966	2	Biological Process:biosynthetic process (GO:0009058),Molecular Function:pyridoxal phosphate binding (GO:0030170)
CAFS_HM_T_00037605	1	Molecular Function:protein binding (GO:0005515)
CAFS_HM_T_00003170	5	Molecular Function:protein kinase activity (GO:0004672),Molecular Function:calmodulin-dependent protein kinase activity (GO:0004683),Molecular Function:calmodulin binding (GO:0005516),Molecular Function:ATP binding (GO:0005524),Biological Process:protein phosphorylation (GO:0006468)
CAFS_HM_T_00036929	--	--
CAFS_HM_T_00073822	5	Molecular Function:protein kinase activity (GO:0004672),Molecular Function:calmodulin-dependent protein kinase activity (GO:0004683),Molecular Function:calmodulin binding (GO:0005516),Molecular Function:ATP binding (GO:0005524),Biological Process:protein phosphorylation (GO:0006468)
CAFS_HM_T_00055326	1	Molecular Function:protein binding (GO:0005515)
CAFS_HM_T_00050564	--	--
CAFS_HM_T_00019858	1	Molecular Function:protein binding (GO:0005515)
CAFS_HM_T_00030286	2	Molecular Function:triose-phosphate isomerase activity (GO:0004807),Biological Process:metabolic process (GO:0008152)
CAFS_HM_T_00043694	1	Molecular Function:protein binding (GO:0005515)
CAFS_HM_T_00062807	3	Molecular Function:catalase activity (GO:0004096),Molecular Function:heme binding (GO:0020037),Biological Process:oxidation-reduction process (GO:0055114)
CAFS_HM_T_00029609	--	--
CAFS_HM_T_00042409	3	Molecular Function:catalytic activity (GO:0003824),Biological Process:metabolic process (GO:0008152),Molecular Function:cofactor binding (GO:0048037)
CAFS_HM_T_00071620	2	Molecular Function:protein complex scaffold (GO:0032947),Biological Process:proteasome assembly (GO:0043248)
CAFS_HM_T_00082092	6	Molecular Function:protein kinase activity (GO:0004672),Molecular Function:Rho guanyl-nucleotide exchange factor activity (GO:0005089),Molecular Function:protein binding (GO:0005515),Molecular Function:ATP binding (GO:0005524),Biological Process:protein phosphorylation (GO:0006468),Biological Process:regulation of Rho protein signal transduction (GO:0035023)
CAFS_HM_T_00026976	1	Biological Process:ATP hydrolysis coupled proton transport (GO:0015991)
CAFS_HM_T_00065611	5	Molecular Function:protein kinase activity (GO:0004672),Molecular Function:calmodulin-dependent protein kinase activity (GO:0004683),Molecular Function:calmodulin binding (GO:0005516),Molecular Function:ATP binding (GO:0005524),Biological Process:protein phosphorylation (GO:0006468)
CAFS_HM_T_00016955	1	Biological Process:cell redox homeostasis (GO:0045454)
CAFS_HM_T_00049606	5	Molecular Function:nucleotide binding (GO:0000166),Molecular Function:arginine-tRNA ligase activity (GO:0004814),Molecular Function:ATP binding (GO:0005524),Cellular Component:cytoplasm (GO:0005737),Biological Process:arginyl-tRNA aminoacylation (GO:0006420)
CAFS_HM_T_00051723	1	Molecular Function:oxidoreductase activity (GO:0016491)
CAFS_HM_T_00007790	3	Molecular Function:motor activity (GO:0003774),Molecular Function:ATP binding (GO:0005524),Cellular Component:myosin complex (GO:0016459)
CAFS_HM_T_00084019	1	Molecular Function:protein binding (GO:0005515)
CAFS_HM_T_00061583	1	Molecular Function:GTPase activity (GO:0003924)
CAFS_HM_T_00061958	2	Molecular Function:oxidoreductase activity (GO:0016491),Biological Process:oxidation-reduction process (GO:0055114)
CAFS_HM_T_00036165	4	Molecular Function:calcium ion binding (GO:0005509),Molecular Function:protein binding (GO:0005515),Biological Process:homophilic cell adhesion via plasma membrane adhesion molecules (GO:0007156),Cellular Component:membrane (GO:0016020)
CAFS_HM_T_00075145	3	Molecular Function:glutamate-ammonia ligase activity (GO:0004356),Biological Process:glutamine biosynthetic process (GO:0006542),Biological Process:nitrogen compound metabolic process (GO:0006807)
CAFS_HM_T_00082999	2	Molecular Function:protein binding (GO:0005515),Cellular Component:membrane (GO:0016020)
CAFS_HM_T_00068229	3	Molecular Function:protein kinase activity (GO:0004672),Molecular Function:ATP binding (GO:0005524),Biological Process:protein phosphorylation (GO:0006468)
CAFS_HM_T_00063080	1	Molecular Function:protein binding (GO:0005515)
CAFS_HM_T_00092107	4	Molecular Function:protein kinase activity (GO:0004672),Molecular Function:protein serine/threonine kinase activity (GO:0004674),Molecular Function:ATP binding (GO:0005524),Biological Process:protein phosphorylation (GO:0006468)
CAFS_HM_T_00046568	1	Molecular Function:DNA binding (GO:0003677)
CAFS_HM_T_00041962	3	Molecular Function:motor activity (GO:0003774),Molecular Function:ATP binding (GO:0005524),Cellular Component:myosin complex (GO:0016459)
CAFS_HM_T_00084412	--	--
CAFS_HM_T_00025420	--	--
CAFS_HM_T_00076336	1	Molecular Function:GTP binding (GO:0005525)
CAFS_HM_T_00004692	--	--
CAFS_HM_T_00038250	1	Molecular Function:protein binding (GO:0005515)
CAFS_HM_T_00009918	2	Biological Process:biosynthetic process (GO:0009058),Molecular Function:pyridoxal phosphate binding (GO:0030170)
CAFS_HM_T_00025324	2	Molecular Function:metallopeptidase activity (GO:0008237),Molecular Function:zinc ion binding (GO:0008270)
CAFS_HM_T_00076176	1	Biological Process:proteolysis (GO:0006508)
CAFS_HM_T_00089448	1	Molecular Function:calcium ion binding (GO:0005509)
CAFS_HM_T_00046608	5	Molecular Function:protein kinase activity (GO:0004672),Molecular Function:calmodulin-dependent protein kinase activity (GO:0004683),Molecular Function:calmodulin binding (GO:0005516),Molecular Function:ATP binding (GO:0005524),Biological Process:protein phosphorylation (GO:0006468)
CAFS_HM_T_00063618	1	Biological Process:cell redox homeostasis (GO:0045454)
CAFS_HM_T_00047131	--	--
CAFS_HM_T_00089476	--	--
CAFS_HM_T_00000528	--	--
CAFS_HM_T_00054371	--	--
CAFS_HM_T_00048160	2	Molecular Function:protein binding (GO:0005515),Biological Process:regulation of GTPase activity (GO:0043087)
CAFS_HM_T_00003676	2	Molecular Function:structural molecule activity (GO:0005198),Cellular Component:intermediate filament (GO:0005882)
CAFS_HM_T_00016920	--	--
CAFS_HM_T_00013840	1	Molecular Function:GTP binding (GO:0005525)
CAFS_HM_T_00081013	--	--
CAFS_HM_T_00078662	2	Molecular Function:glutaminase activity (GO:0004359),Biological Process:glutamine metabolic process (GO:0006541)
CAFS_HM_T_00030719	1	Molecular Function:protein binding (GO:0005515)
CAFS_HM_T_00057687	4	Molecular Function:nucleotide binding (GO:0000166),Molecular Function:aminoacyl-tRNA ligase activity (GO:0004812),Molecular Function:ATP binding (GO:0005524),Biological Process:tRNA aminoacylation for protein translation (GO:0006418)
CAFS_HM_T_00031224	4	Molecular Function:serine-type endopeptidase activity (GO:0004252),Biological Process:proteolysis (GO:0006508),Molecular Function:serine-type peptidase activity (GO:0008236),Molecular Function:serine-type exopeptidase activity (GO:0070008)
CAFS_HM_T_00077687	--	--
CAFS_HM_T_00034703	--	--
CAFS_HM_T_00059356	5	Molecular Function:nucleotide binding (GO:0000166),Molecular Function:nucleic acid binding (GO:0003676),Molecular Function:aminoacyl-tRNA ligase activity (GO:0004812),Molecular Function:ATP binding (GO:0005524),Biological Process:tRNA aminoacylation for protein translation (GO:0006418)
CAFS_HM_T_00075365	1	Molecular Function:tubulin binding (GO:0015631)
CAFS_HM_T_00040628	1	Biological Process:regulation of GTPase activity (GO:0043087)
CAFS_HM_T_00075768	1	Molecular Function:protein binding (GO:0005515)
CAFS_HM_T_00030642	2	Biological Process:metabolic process (GO:0008152),Molecular Function:hydrolase activity (GO:0016787)
CAFS_HM_T_00009913	2	Molecular Function:catalytic activity (GO:0003824),Biological Process:nucleoside metabolic process (GO:0009116)
CAFS_HM_T_00074457	4	Molecular Function:microtubule motor activity (GO:0003777),Molecular Function:ATP binding (GO:0005524),Biological Process:microtubule-based movement (GO:0007018),Molecular Function:microtubule binding (GO:0008017)
CAFS_HM_T_00040703	5	Molecular Function:transporter activity (GO:0005215),Biological Process:transport (GO:0006810),Biological Process:ion transport (GO:0006811),Cellular Component:membrane (GO:0016020),Biological Process:transmembrane transport (GO:0055085)
CAFS_HM_T_00067108	3	Molecular Function:malate dehydrogenase (decarboxylating) (NAD+) activity (GO:0004471),Molecular Function:NAD binding (GO:0051287),Biological Process:oxidation-reduction process (GO:0055114)
CAFS_HM_T_00023363	--	--
CAFS_HM_T_00043643	3	Biological Process:cellular amino acid metabolic process (GO:0006520),Molecular Function:oxidoreductase activity (GO:0016491),Biological Process:oxidation-reduction process (GO:0055114)
CAFS_HM_T_00066779	2	Molecular Function:protein binding (GO:0005515),Biological Process:signal transduction (GO:0007165)
CAFS_HM_T_00045944	1	Molecular Function:hydrolase activity (GO:0016787)
CAFS_HM_T_00031096	2	Molecular Function:protein binding (GO:0005515),Cellular Component:cytoskeleton (GO:0005856)
CAFS_HM_T_00050362	--	--
CAFS_HM_T_00092469	5	Molecular Function:phosphatidylinositol phospholipase C activity (GO:0004435),Molecular Function:protein binding (GO:0005515),Biological Process:lipid metabolic process (GO:0006629),Biological Process:signal transduction (GO:0007165),Biological Process:intracellular signal transduction (GO:0035556)
CAFS_HM_T_00029674	--	--
CAFS_HM_T_00052684	5	Molecular Function:nucleotide binding (GO:0000166),Molecular Function:nucleic acid binding (GO:0003676),Molecular Function:aminoacyl-tRNA ligase activity (GO:0004812),Molecular Function:ATP binding (GO:0005524),Biological Process:tRNA aminoacylation for protein translation (GO:0006418)
CAFS_HM_T_00015634	3	Molecular Function:2',3'-cyclic-nucleotide 3'-phosphodiesterase activity (GO:0004113),Biological Process:cyclic nucleotide catabolic process (GO:0009214),Cellular Component:membrane (GO:0016020)
CAFS_HM_T_00091656	2	Molecular Function:oxidoreductase activity (GO:0016491),Biological Process:oxidation-reduction process (GO:0055114)
CAFS_HM_T_00032050	--	--
CAFS_HM_T_00040325	2	Biological Process:metabolic process (GO:0008152),Molecular Function:CoA-transferase activity (GO:0008410)
CAFS_HM_T_00069136	--	--
CAFS_HM_T_00055287	--	--
CAFS_HM_T_00085019	4	Cellular Component:extracellular region (GO:0005576),Biological Process:lipid transport (GO:0006869),Molecular Function:lipid binding (GO:0008289),Biological Process:lipoprotein metabolic process (GO:0042157)
CAFS_HM_T_00038479	2	Molecular Function:structural molecule activity (GO:0005198),Cellular Component:intermediate filament (GO:0005882)
CAFS_HM_T_00073474	--	--
CAFS_HM_T_00006740	3	Biological Process:metabolic process (GO:0008152),Molecular Function:oxidoreductase activity (GO:0016491),Biological Process:oxidation-reduction process (GO:0055114)
CAFS_HM_T_00028713	--	--
CAFS_HM_T_00065410	2	Molecular Function:nucleic acid binding (GO:0003676),Molecular Function:ATP binding (GO:0005524)
CAFS_HM_T_00028007	2	Molecular Function:actin binding (GO:0003779),Biological Process:cytoskeleton organization (GO:0007010)
CAFS_HM_T_00040502	3	Molecular Function:adenosylhomocysteinase activity (GO:0004013),Biological Process:S-adenosylhomocysteine catabolic process (GO:0019510),Molecular Function:NAD binding (GO:0051287)
CAFS_HM_T_00027638	2	Molecular Function:hydrogen ion transmembrane transporter activity (GO:0015078),Biological Process:ATP hydrolysis coupled proton transport (GO:0015991)
CAFS_HM_T_00013870	--	--
CAFS_HM_T_00079170	5	Molecular Function:phosphatidylinositol phospholipase C activity (GO:0004435),Molecular Function:protein binding (GO:0005515),Biological Process:lipid metabolic process (GO:0006629),Biological Process:signal transduction (GO:0007165),Biological Process:intracellular signal transduction (GO:0035556)
CAFS_HM_T_00024454	2	Molecular Function:oxidoreductase activity (GO:0016491),Biological Process:oxidation-reduction process (GO:0055114)
CAFS_HM_T_00032941	1	Biological Process:molybdopterin cofactor biosynthetic process (GO:0032324)
CAFS_HM_T_00045362	1	Biological Process:oxidation-reduction process (GO:0055114)
CAFS_HM_T_00004550	--	--
CAFS_HM_T_00048587	--	--
CAFS_HM_T_00065427	1	Biological Process:metabolic process (GO:0008152)
CAFS_HM_T_00009409	--	--
CAFS_HM_T_00050183	1	Biological Process:metabolic process (GO:0008152)
CAFS_HM_T_00033386	--	--
CAFS_HM_T_00062164	2	Molecular Function:oxidoreductase activity (GO:0016491),Biological Process:oxidation-reduction process (GO:0055114)
CAFS_HM_T_00008768	4	Molecular Function:protein binding (GO:0005515),Molecular Function:ATP binding (GO:0005524),Cellular Component:chromosome (GO:0005694),Biological Process:chromosome organization (GO:0051276)
CAFS_HM_T_00006841	4	Molecular Function:monooxygenase activity (GO:0004497),Molecular Function:copper ion binding (GO:0005507),Molecular Function:protein binding (GO:0005515),Biological Process:oxidation-reduction process (GO:0055114)
CAFS_HM_T_00082455	3	Molecular Function:zinc ion binding (GO:0008270),Biological Process:protein deubiquitination (GO:0016579),Molecular Function:thiol-dependent ubiquitinyl hydrolase activity (GO:0036459)
CAFS_HM_T_00023283	4	Biological Process:ion transport (GO:0006811),Molecular Function:ion transmembrane transporter activity (GO:0015075),Cellular Component:membrane (GO:0016020),Biological Process:transmembrane transport (GO:0055085)
CAFS_HM_T_00040530	2	Molecular Function:hydrogen ion transmembrane transporter activity (GO:0015078),Biological Process:ATP synthesis coupled proton transport (GO:0015986)
CAFS_HM_T_00003584	1	Molecular Function:nucleic acid binding (GO:0003676)
CAFS_HM_T_00035633	1	Biological Process:carbohydrate metabolic process (GO:0005975)
CAFS_HM_T_00048841	--	--
CAFS_HM_T_00051706	1	Molecular Function:ATP binding (GO:0005524)
CAFS_HM_T_00013254	1	Molecular Function:protein binding (GO:0005515)
CAFS_HM_T_00048411	4	Molecular Function:acyl-CoA dehydrogenase activity (GO:0003995),Biological Process:metabolic process (GO:0008152),Molecular Function:flavin adenine dinucleotide binding (GO:0050660),Biological Process:oxidation-reduction process (GO:0055114)
CAFS_HM_T_00064381	3	Molecular Function:mannose-6-phosphate isomerase activity (GO:0004476),Biological Process:carbohydrate metabolic process (GO:0005975),Molecular Function:zinc ion binding (GO:0008270)
CAFS_HM_T_00054805	4	Cellular Component:nucleosome (GO:0000786),Molecular Function:DNA binding (GO:0003677),Cellular Component:nucleus (GO:0005634),Biological Process:nucleosome assembly (GO:0006334)
CAFS_HM_T_00070772	--	--
CAFS_HM_T_00047028	1	Molecular Function:ATP binding (GO:0005524)
CAFS_HM_T_00085450	2	Molecular Function:hydrogen ion transmembrane transporter activity (GO:0015078),Biological Process:ATP hydrolysis coupled proton transport (GO:0015991)
CAFS_HM_T_00017823	3	Molecular Function:adenosylhomocysteinase activity (GO:0004013),Biological Process:S-adenosylhomocysteine catabolic process (GO:0019510),Molecular Function:NAD binding (GO:0051287)
CAFS_HM_T_00066061	5	Molecular Function:nucleotide binding (GO:0000166),Molecular Function:aminoacyl-tRNA ligase activity (GO:0004812),Molecular Function:ATP binding (GO:0005524),Biological Process:tRNA aminoacylation for protein translation (GO:0006418),Biological Process:tRNA aminoacylation (GO:0043039)
CAFS_HM_T_00076582	3	Cellular Component:proteinaceous extracellular matrix (GO:0005578),Cellular Component:membrane (GO:0016020),Molecular Function:heparan sulfate proteoglycan binding (GO:0043395)
CAFS_HM_T_00062089	2	Molecular Function:catalytic activity (GO:0003824),Biological Process:metabolic process (GO:0008152)
CAFS_HM_T_00051346	2	Molecular Function:actin binding (GO:0003779),Cellular Component:intracellular (GO:0005622)
CAFS_HM_T_00071356	3	Cellular Component:sodium:potassium-exchanging ATPase complex (GO:0005890),Biological Process:potassium ion transport (GO:0006813),Biological Process:sodium ion transport (GO:0006814)
CAFS_HM_T_00039323	2	Biological Process:carbohydrate metabolic process (GO:0005975),Molecular Function:carbohydrate binding (GO:0030246)
CAFS_HM_T_00076467	2	Molecular Function:structural molecule activity (GO:0005198),Cellular Component:intermediate filament (GO:0005882)
CAFS_HM_T_00006719	1	Molecular Function:cysteine-type endopeptidase inhibitor activity (GO:0004869)
CAFS_HM_T_00078136	1	Cellular Component:cytoskeleton (GO:0005856)
CAFS_HM_T_00006701	3	Molecular Function:copper ion binding (GO:0005507),Molecular Function:oxidoreductase activity (GO:0016491),Biological Process:oxidation-reduction process (GO:0055114)
CAFS_HM_T_00090227	2	Biological Process:metabolic process (GO:0008152),Molecular Function:uridylyltransferase activity (GO:0070569)
CAFS_HM_T_00064354	--	--
CAFS_HM_T_00065550	3	Molecular Function:oxidoreductase activity (GO:0016491),Molecular Function:protein dimerization activity (GO:0046983),Biological Process:oxidation-reduction process (GO:0055114)
CAFS_HM_T_00066011	1	Molecular Function:metal ion binding (GO:0046872)
CAFS_HM_T_00024547	--	--
CAFS_HM_T_00034007	1	Biological Process:'de novo' IMP biosynthetic process (GO:0006189)
CAFS_HM_T_00083490	2	Biological Process:metabolic process (GO:0008152),Molecular Function:hydrolase activity (GO:0016787)
CAFS_HM_T_00008821	1	Molecular Function:ATP binding (GO:0005524)
CAFS_HM_T_00054211	3	Molecular Function:protein binding (GO:0005515),Biological Process:intracellular protein transport (GO:0006886),Molecular Function:Ran GTPase binding (GO:0008536)
CAFS_HM_T_00022906	5	Molecular Function:protein kinase activity (GO:0004672),Molecular Function:calmodulin-dependent protein kinase activity (GO:0004683),Molecular Function:calmodulin binding (GO:0005516),Molecular Function:ATP binding (GO:0005524),Biological Process:protein phosphorylation (GO:0006468)
CAFS_HM_T_00015036	1	Molecular Function:actin filament binding (GO:0051015)
CAFS_HM_T_00001863	3	Molecular Function:endopeptidase inhibitor activity (GO:0004866),Cellular Component:extracellular region (GO:0005576),Cellular Component:extracellular space (GO:0005615)
CAFS_HM_T_00022076	2	Biological Process:ubiquitin-dependent protein catabolic process (GO:0006511),Molecular Function:ubiquitin protein ligase binding (GO:0031625)
CAFS_HM_T_00088739	1	Molecular Function:calcium ion binding (GO:0005509)
CAFS_HM_T_00016847	5	Molecular Function:electron carrier activity (GO:0009055),Molecular Function:protein disulfide oxidoreductase activity (GO:0015035),Molecular Function:oxidoreductase activity (GO:0016491),Biological Process:cell redox homeostasis (GO:0045454),Biological Process:oxidation-reduction process (GO:0055114)
CAFS_HM_T_00039900	--	--
CAFS_HM_T_00026362	1	Molecular Function:ATP binding (GO:0005524)
CAFS_HM_T_00074112	4	Molecular Function:calcium ion binding (GO:0005509),Cellular Component:endoplasmic reticulum (GO:0005783),Biological Process:protein folding (GO:0006457),Molecular Function:unfolded protein binding (GO:0051082)
CAFS_HM_T_00064328	--	--
CAFS_HM_T_00020008	--	--
CAFS_HM_T_00033691	3	Molecular Function:motor activity (GO:0003774),Molecular Function:ATP binding (GO:0005524),Cellular Component:myosin complex (GO:0016459)
CAFS_HM_T_00064025	1	Molecular Function:GTP binding (GO:0005525)
CAFS_HM_T_00083277	--	--
CAFS_HM_T_00017438	--	--
CAFS_HM_T_00042759	2	Molecular Function:fructose-bisphosphate aldolase activity (GO:0004332),Biological Process:glycolytic process (GO:0006096)
CAFS_HM_T_00080171	2	Molecular Function:calcium ion binding (GO:0005509),Molecular Function:protein binding (GO:0005515)
CAFS_HM_T_00071018	--	--
CAFS_HM_T_00026966	3	Molecular Function:adenosylhomocysteinase activity (GO:0004013),Biological Process:S-adenosylhomocysteine catabolic process (GO:0019510),Molecular Function:NAD binding (GO:0051287)
CAFS_HM_T_00062314	--	--
CAFS_HM_T_00071862	2	Molecular Function:protein binding (GO:0005515),Cellular Component:cytoplasm (GO:0005737)
CAFS_HM_T_00060545	--	--
CAFS_HM_T_00018749	2	Molecular Function:protein binding (GO:0005515),Cellular Component:membrane (GO:0016020)
CAFS_HM_T_00057696	--	--
CAFS_HM_T_00016898	4	Biological Process:metabolic process (GO:0008152),Biological Process:biosynthetic process (GO:0009058),Molecular Function:oxidoreductase activity (GO:0016491),Biological Process:oxidation-reduction process (GO:0055114)
CAFS_HM_T_00076832	2	Biological Process:protein deubiquitination (GO:0016579),Molecular Function:thiol-dependent ubiquitinyl hydrolase activity (GO:0036459)
CAFS_HM_T_00085793	1	Molecular Function:GTP binding (GO:0005525)
CAFS_HM_T_00014875	2	Molecular Function:Rho GDP-dissociation inhibitor activity (GO:0005094),Cellular Component:cytoplasm (GO:0005737)
CAFS_HM_T_00045250	2	Molecular Function:nucleic acid binding (GO:0003676),Molecular Function:ATP binding (GO:0005524)
CAFS_HM_T_00006831	2	Molecular Function:hydroxymethylglutaryl-CoA synthase activity (GO:0004421),Biological Process:isoprenoid biosynthetic process (GO:0008299)
CAFS_HM_T_00078205	2	Molecular Function:UDP-glucose:glycoprotein glucosyltransferase activity (GO:0003980),Biological Process:protein glycosylation (GO:0006486)
CAFS_HM_T_00016252	--	--
CAFS_HM_T_00024851	5	Molecular Function:serine-type endopeptidase activity (GO:0004252),Molecular Function:scavenger receptor activity (GO:0005044),Molecular Function:protein binding (GO:0005515),Biological Process:proteolysis (GO:0006508),Cellular Component:membrane (GO:0016020)
CAFS_HM_T_00032587	1	Molecular Function:ATP binding (GO:0005524)
CAFS_HM_T_00091719	1	Molecular Function:ATP binding (GO:0005524)
CAFS_HM_T_00063185	1	Cellular Component:membrane (GO:0016020)
CAFS_HM_T_00063071	1	Molecular Function:protein binding (GO:0005515)
CAFS_HM_T_00052005	2	Molecular Function:structural molecule activity (GO:0005198),Cellular Component:intermediate filament (GO:0005882)
CAFS_HM_T_00012421	--	--
CAFS_HM_T_00018776	5	Molecular Function:acyl-CoA dehydrogenase activity (GO:0003995),Molecular Function:acyl-CoA oxidase activity (GO:0003997),Cellular Component:peroxisome (GO:0005777),Biological Process:fatty acid beta-oxidation (GO:0006635),Biological Process:oxidation-reduction process (GO:0055114)
CAFS_HM_T_00021115	1	Molecular Function:protein binding (GO:0005515)
CAFS_HM_T_00090516	--	--
CAFS_HM_T_00045124	3	Biological Process:metabolic process (GO:0008152),Molecular Function:oxidoreductase activity (GO:0016491),Biological Process:oxidation-reduction process (GO:0055114)
CAFS_HM_T_00000544	2	Molecular Function:GTPase activity (GO:0003924),Molecular Function:GTP binding (GO:0005525)
CAFS_HM_T_00035464	2	Molecular Function:oxidoreductase activity (GO:0016491),Biological Process:oxidation-reduction process (GO:0055114)
CAFS_HM_T_00062038	--	--
CAFS_HM_T_00010304	--	--
CAFS_HM_T_00018049	4	Molecular Function:nucleotide binding (GO:0000166),Molecular Function:aminoacyl-tRNA ligase activity (GO:0004812),Molecular Function:ATP binding (GO:0005524),Biological Process:tRNA aminoacylation for protein translation (GO:0006418)
CAFS_HM_T_00013460	--	--
CAFS_HM_T_00066681	1	Molecular Function:protein binding (GO:0005515)
CAFS_HM_T_00076552	1	Cellular Component:secretory granule (GO:0030141)
CAFS_HM_T_00010014	2	Molecular Function:nucleic acid binding (GO:0003676),Cellular Component:nucleus (GO:0005634)
CAFS_HM_T_00009042	4	Molecular Function:calcium ion binding (GO:0005509),Cellular Component:endoplasmic reticulum (GO:0005783),Biological Process:protein folding (GO:0006457),Molecular Function:unfolded protein binding (GO:0051082)
CAFS_HM_T_00001457	2	Molecular Function:nucleic acid binding (GO:0003676),Cellular Component:nucleus (GO:0005634)
CAFS_HM_T_00068283	2	Molecular Function:protein binding (GO:0005515),Molecular Function:metal ion binding (GO:0046872)
CAFS_HM_T_00035656	3	Biological Process:metabolic process (GO:0008152),Molecular Function:NAD binding (GO:0051287),Biological Process:oxidation-reduction process (GO:0055114)
CAFS_HM_T_00069561	--	--
CAFS_HM_T_00021569	--	--
CAFS_HM_T_00038216	1	Molecular Function:protein binding (GO:0005515)
CAFS_HM_T_00004948	--	--
CAFS_HM_T_00079405	5	Molecular Function:nucleotide binding (GO:0000166),Molecular Function:nucleic acid binding (GO:0003676),Molecular Function:aminoacyl-tRNA ligase activity (GO:0004812),Molecular Function:ATP binding (GO:0005524),Biological Process:tRNA aminoacylation for protein translation (GO:0006418)
CAFS_HM_T_00029688	6	Molecular Function:protein kinase activity (GO:0004672),Molecular Function:Rho guanyl-nucleotide exchange factor activity (GO:0005089),Molecular Function:protein binding (GO:0005515),Molecular Function:ATP binding (GO:0005524),Biological Process:protein phosphorylation (GO:0006468),Biological Process:regulation of Rho protein signal transduction (GO:0035023)
CAFS_HM_T_00061833	5	Molecular Function:microtubule motor activity (GO:0003777),Molecular Function:protein binding (GO:0005515),Molecular Function:ATP binding (GO:0005524),Biological Process:microtubule-based movement (GO:0007018),Molecular Function:microtubule binding (GO:0008017)
CAFS_HM_T_00031348	4	Biological Process:metabolic process (GO:0008152),Molecular Function:intramolecular transferase activity (GO:0016866),Molecular Function:cobalamin binding (GO:0031419),Molecular Function:metal ion binding (GO:0046872)
CAFS_HM_T_00041145	2	Molecular Function:flavin adenine dinucleotide binding (GO:0050660),Biological Process:oxidation-reduction process (GO:0055114)
CAFS_HM_T_00072531	--	--
CAFS_HM_T_00066604	--	--
CAFS_HM_T_00067316	3	Molecular Function:protein kinase activity (GO:0004672),Molecular Function:ATP binding (GO:0005524),Biological Process:protein phosphorylation (GO:0006468)
CAFS_HM_T_00017811	3	Molecular Function:aminopeptidase activity (GO:0004177),Cellular Component:intracellular (GO:0005622),Biological Process:proteolysis (GO:0006508)
CAFS_HM_T_00033362	1	Molecular Function:calcium ion binding (GO:0005509)
CAFS_HM_T_00054075	1	Molecular Function:protein binding (GO:0005515)
CAFS_HM_T_00011903	1	Molecular Function:protein binding (GO:0005515)
CAFS_HM_T_00031229	1	Biological Process:metabolic process (GO:0008152)
CAFS_HM_T_00073050	4	Molecular Function:protein kinase activity (GO:0004672),Molecular Function:ATP binding (GO:0005524),Biological Process:protein phosphorylation (GO:0006468),Biological Process:intracellular signal transduction (GO:0035556)
CAFS_HM_T_00078102	5	Molecular Function:structural molecule activity (GO:0005198),Molecular Function:protein binding (GO:0005515),Biological Process:intracellular protein transport (GO:0006886),Biological Process:vesicle-mediated transport (GO:0016192),Cellular Component:membrane coat (GO:0030117)
CAFS_HM_T_00032556	4	Molecular Function:antioxidant activity (GO:0016209),Molecular Function:oxidoreductase activity (GO:0016491),Molecular Function:peroxiredoxin activity (GO:0051920),Biological Process:oxidation-reduction process (GO:0055114)
CAFS_HM_T_00033281	1	Molecular Function:protein binding (GO:0005515)
CAFS_HM_T_00085854	1	Molecular Function:nucleic acid binding (GO:0003676)
CAFS_HM_T_00058881	1	Molecular Function:GTP binding (GO:0005525)
CAFS_HM_T_00077598	--	--
CAFS_HM_T_00039353	2	Molecular Function:catalytic activity (GO:0003824),Biological Process:metabolic process (GO:0008152)
CAFS_HM_T_00008540	1	Molecular Function:nucleic acid binding (GO:0003676)
CAFS_HM_T_00069191	--	--
CAFS_HM_T_00046263	--	--
CAFS_HM_T_00008975	3	Molecular Function:protein tyrosine phosphatase activity (GO:0004725),Molecular Function:protein binding (GO:0005515),Biological Process:protein dephosphorylation (GO:0006470)
CAFS_HM_T_00018586	3	Molecular Function:carboxy-lyase activity (GO:0016831),Biological Process:carboxylic acid metabolic process (GO:0019752),Molecular Function:pyridoxal phosphate binding (GO:0030170)
CAFS_HM_T_00000705	1	Molecular Function:protein binding (GO:0005515)
CAFS_HM_T_00053251	--	--
CAFS_HM_T_00049353	1	Molecular Function:hydrolase activity (GO:0016787)
CAFS_HM_T_00001240	2	Molecular Function:oxidoreductase activity (GO:0016491),Biological Process:oxidation-reduction process (GO:0055114)
CAFS_HM_T_00059797	--	--
CAFS_HM_T_00073537	3	Molecular Function:IMP cyclohydrolase activity (GO:0003937),Molecular Function:phosphoribosylaminoimidazolecarboxamide formyltransferase activity (GO:0004643),Biological Process:purine nucleotide biosynthetic process (GO:0006164)
CAFS_HM_T_00022594	1	Biological Process:metabolic process (GO:0008152)
CAFS_HM_T_00041384	2	Cellular Component:mitochondrial outer membrane (GO:0005741),Biological Process:transmembrane transport (GO:0055085)
CAFS_HM_T_00042530	1	Molecular Function:ATP binding (GO:0005524)
CAFS_HM_T_00050263	--	--
CAFS_HM_T_00034209	1	Molecular Function:hydrolase activity (GO:0016787)
CAFS_HM_T_00009206	2	Molecular Function:tropomyosin binding (GO:0005523),Biological Process:pointed-end actin filament capping (GO:0051694)
CAFS_HM_T_00007894	3	Molecular Function:protein kinase activity (GO:0004672),Molecular Function:ATP binding (GO:0005524),Biological Process:protein phosphorylation (GO:0006468)
CAFS_HM_T_00062847	--	--
CAFS_HM_T_00089103	2	Molecular Function:RNA binding (GO:0003723),Molecular Function:protein binding (GO:0005515)
CAFS_HM_T_00056370	--	--
CAFS_HM_T_00003342	2	Cellular Component:mitochondrial outer membrane (GO:0005741),Biological Process:transmembrane transport (GO:0055085)
CAFS_HM_T_00071811	5	Molecular Function:receptor binding (GO:0005102),Cellular Component:fibrinogen complex (GO:0005577),Biological Process:signal transduction (GO:0007165),Biological Process:platelet activation (GO:0030168),Biological Process:protein polymerization (GO:0051258)
CAFS_HM_T_00037200	3	Molecular Function:ionotropic glutamate receptor activity (GO:0004970),Molecular Function:extracellular-glutamate-gated ion channel activity (GO:0005234),Cellular Component:membrane (GO:0016020)
CAFS_HM_T_00069616	1	Molecular Function:small protein activating enzyme activity (GO:0008641)
CAFS_HM_T_00013787	3	Molecular Function:protein kinase activity (GO:0004672),Molecular Function:ATP binding (GO:0005524),Biological Process:protein phosphorylation (GO:0006468)
CAFS_HM_T_00063632	1	Cellular Component:presynaptic active zone (GO:0048786)
CAFS_HM_T_00091900	1	Molecular Function:hydrolase activity (GO:0016787)
CAFS_HM_T_00062028	2	Molecular Function:oxidoreductase activity (GO:0016491),Biological Process:oxidation-reduction process (GO:0055114)
CAFS_HM_T_00085942	3	Cellular Component:sodium:potassium-exchanging ATPase complex (GO:0005890),Biological Process:potassium ion transport (GO:0006813),Biological Process:sodium ion transport (GO:0006814)
CAFS_HM_T_00044595	3	Molecular Function:protein transporter activity (GO:0008565),Biological Process:protein transport (GO:0015031),Cellular Component:retromer complex (GO:0030904)
CAFS_HM_T_00011576	--	--
CAFS_HM_T_00030353	--	--
CAFS_HM_T_00090923	1	Molecular Function:protein binding (GO:0005515)
CAFS_HM_T_00018125	2	Molecular Function:nucleic acid binding (GO:0003676),Molecular Function:ATP binding (GO:0005524)
CAFS_HM_T_00024296	--	--
CAFS_HM_T_00088094	2	Molecular Function:actin binding (GO:0003779),Molecular Function:phospholipid binding (GO:0005543)
CAFS_HM_T_00016435	--	--
CAFS_HM_T_00060769	2	Molecular Function:structural molecule activity (GO:0005198),Cellular Component:intermediate filament (GO:0005882)
CAFS_HM_T_00071994	3	Molecular Function:endopeptidase inhibitor activity (GO:0004866),Cellular Component:extracellular region (GO:0005576),Cellular Component:extracellular space (GO:0005615)
CAFS_HM_T_00028934	--	--
CAFS_HM_T_00058021	1	Molecular Function:protein binding (GO:0005515)
CAFS_HM_T_00016432	3	Molecular Function:calcium ion binding (GO:0005509),Molecular Function:oxidoreductase activity (GO:0016491),Biological Process:oxidation-reduction process (GO:0055114)
CAFS_HM_T_00088644	1	Biological Process:regulation of GTPase activity (GO:0043087)
CAFS_HM_T_00083247	--	--
CAFS_HM_T_00037959	4	Molecular Function:calcium ion binding (GO:0005509),Cellular Component:endoplasmic reticulum (GO:0005783),Biological Process:protein folding (GO:0006457),Molecular Function:unfolded protein binding (GO:0051082)
CAFS_HM_T_00003570	--	--
CAFS_HM_T_00029392	1	Molecular Function:calcium ion binding (GO:0005509)
CAFS_HM_T_00081120	3	Molecular Function:malate dehydrogenase (decarboxylating) (NAD+) activity (GO:0004471),Molecular Function:NAD binding (GO:0051287),Biological Process:oxidation-reduction process (GO:0055114)
CAFS_HM_T_00040451	2	Cellular Component:F-actin capping protein complex (GO:0008290),Biological Process:barbed-end actin filament capping (GO:0051016)
CAFS_HM_T_00051687	--	--
CAFS_HM_T_00067549	1	Molecular Function:protein binding (GO:0005515)
CAFS_HM_T_00042104	1	Molecular Function:ATP binding (GO:0005524)
CAFS_HM_T_00033486	3	Molecular Function:nucleic acid binding (GO:0003676),Molecular Function:protein binding (GO:0005515),Molecular Function:ATP binding (GO:0005524)
CAFS_HM_T_00038520	1	Molecular Function:GTP binding (GO:0005525)
CAFS_HM_T_00067055	--	--
CAFS_HM_T_00077286	--	--
CAFS_HM_T_00016133	3	Molecular Function:aminopeptidase activity (GO:0004177),Cellular Component:intracellular (GO:0005622),Biological Process:proteolysis (GO:0006508)
CAFS_HM_T_00031409	2	Molecular Function:serine-type endopeptidase activity (GO:0004252),Biological Process:proteolysis (GO:0006508)
CAFS_HM_T_00068113	1	Molecular Function:nucleic acid binding (GO:0003676)
CAFS_HM_T_00068323	1	Molecular Function:GTP binding (GO:0005525)
CAFS_HM_T_00076702	--	--
CAFS_HM_T_00079193	1	Biological Process:ATP synthesis coupled proton transport (GO:0015986)
CAFS_HM_T_00019072	--	--
CAFS_HM_T_00030006	1	Molecular Function:protein binding (GO:0005515)
CAFS_HM_T_00088929	5	Molecular Function:magnesium ion binding (GO:0000287),Molecular Function:RNA binding (GO:0003723),Molecular Function:phenylalanine-tRNA ligase activity (GO:0004826),Molecular Function:ATP binding (GO:0005524),Biological Process:phenylalanyl-tRNA aminoacylation (GO:0006432)
CAFS_HM_T_00048488	2	Molecular Function:GTP binding (GO:0005525),Biological Process:small GTPase mediated signal transduction (GO:0007264)
CAFS_HM_T_00002728	2	Molecular Function:serine-type endopeptidase activity (GO:0004252),Biological Process:proteolysis (GO:0006508)
CAFS_HM_T_00012602	2	Molecular Function:oxygen binding (GO:0019825),Molecular Function:heme binding (GO:0020037)
CAFS_HM_T_00070795	4	Molecular Function:calcium ion binding (GO:0005509),Cellular Component:endoplasmic reticulum (GO:0005783),Biological Process:protein folding (GO:0006457),Molecular Function:unfolded protein binding (GO:0051082)
CAFS_HM_T_00011616	1	Molecular Function:metal ion binding (GO:0046872)
CAFS_HM_T_00077445	1	Molecular Function:GTP binding (GO:0005525)
CAFS_HM_T_00079707	4	Molecular Function:microtubule motor activity (GO:0003777),Molecular Function:ATP binding (GO:0005524),Biological Process:microtubule-based movement (GO:0007018),Molecular Function:microtubule binding (GO:0008017)
CAFS_HM_T_00057047	1	Molecular Function:protein binding (GO:0005515)
CAFS_HM_T_00053489	1	Molecular Function:protein binding (GO:0005515)
CAFS_HM_T_00074253	1	Molecular Function:protein binding (GO:0005515)
CAFS_HM_T_00021265	4	Molecular Function:calcium-dependent cysteine-type endopeptidase activity (GO:0004198),Molecular Function:calcium ion binding (GO:0005509),Cellular Component:intracellular (GO:0005622),Biological Process:proteolysis (GO:0006508)
CAFS_HM_T_00013580	1	Molecular Function:hydrolase activity (GO:0016787)
CAFS_HM_T_00036669	1	Molecular Function:protein binding (GO:0005515)
CAFS_HM_T_00055394	--	--
CAFS_HM_T_00053124	1	Cellular Component:presynaptic active zone (GO:0048786)
CAFS_HM_T_00076920	1	Molecular Function:protein binding (GO:0005515)
CAFS_HM_T_00014524	5	Molecular Function:serine-type endopeptidase activity (GO:0004252),Molecular Function:calcium ion binding (GO:0005509),Molecular Function:protein binding (GO:0005515),Cellular Component:extracellular region (GO:0005576),Biological Process:proteolysis (GO:0006508)
CAFS_HM_T_00052592	1	Molecular Function:protein binding (GO:0005515)
CAFS_HM_T_00079203	2	Biological Process:protein deubiquitination (GO:0016579),Molecular Function:thiol-dependent ubiquitinyl hydrolase activity (GO:0036459)
CAFS_HM_T_00037681	4	Molecular Function:calcium ion binding (GO:0005509),Cellular Component:endoplasmic reticulum (GO:0005783),Biological Process:protein folding (GO:0006457),Molecular Function:unfolded protein binding (GO:0051082)
CAFS_HM_T_00060445	--	--
CAFS_HM_T_00048395	2	Molecular Function:catalytic activity (GO:0003824),Biological Process:carbohydrate metabolic process (GO:0005975)
CAFS_HM_T_00043102	2	Molecular Function:calcium ion binding (GO:0005509),Molecular Function:calcium-dependent phospholipid binding (GO:0005544)
CAFS_HM_T_00015689	2	Molecular Function:hydrogen ion transmembrane transporter activity (GO:0015078),Biological Process:ATP hydrolysis coupled proton transport (GO:0015991)
CAFS_HM_T_00018609	--	--
CAFS_HM_T_00053158	5	Molecular Function:endopeptidase activity (GO:0004175),Molecular Function:threonine-type endopeptidase activity (GO:0004298),Cellular Component:proteasome core complex (GO:0005839),Biological Process:ubiquitin-dependent protein catabolic process (GO:0006511),Biological Process:proteolysis involved in cellular protein catabolic process (GO:0051603)
CAFS_HM_T_00009694	1	Biological Process:metabolic process (GO:0008152)
CAFS_HM_T_00033135	4	Molecular Function:DNA binding (GO:0003677),Molecular Function:NAD+ ADP-ribosyltransferase activity (GO:0003950),Biological Process:protein ADP-ribosylation (GO:0006471),Molecular Function:zinc ion binding (GO:0008270)
CAFS_HM_T_00013167	1	Molecular Function:GTP binding (GO:0005525)
CAFS_HM_T_00060870	2	Molecular Function:catalytic activity (GO:0003824),Biological Process:metabolic process (GO:0008152)
CAFS_HM_T_00035662	1	Biological Process:oxidation-reduction process (GO:0055114)
CAFS_HM_T_00088699	--	--
CAFS_HM_T_00091029	6	Molecular Function:catalytic activity (GO:0003824),Molecular Function:formate-tetrahydrofolate ligase activity (GO:0004329),Molecular Function:methylenetetrahydrofolate dehydrogenase (NADP+) activity (GO:0004488),Molecular Function:ATP binding (GO:0005524),Biological Process:folic acid-containing compound biosynthetic process (GO:0009396),Biological Process:oxidation-reduction process (GO:0055114)
CAFS_HM_T_00029911	4	Cellular Component:proteasome complex (GO:0000502),Molecular Function:protein binding (GO:0005515),Molecular Function:enzyme regulator activity (GO:0030234),Biological Process:regulation of protein catabolic process (GO:0042176)
CAFS_HM_T_00079380	--	--
CAFS_HM_T_00085115	1	Molecular Function:ATP binding (GO:0005524)
CAFS_HM_T_00018915	--	--
CAFS_HM_T_00063827	--	--
CAFS_HM_T_00090843	1	Biological Process:molybdopterin cofactor biosynthetic process (GO:0032324)
CAFS_HM_T_00072192	2	Molecular Function:GTPase activity (GO:0003924),Molecular Function:GTP binding (GO:0005525)
CAFS_HM_T_00019339	2	Molecular Function:catalytic activity (GO:0003824),Biological Process:metabolic process (GO:0008152)
CAFS_HM_T_00075125	--	--
CAFS_HM_T_00008960	4	Molecular Function:ATP-dependent peptidase activity (GO:0004176),Molecular Function:serine-type endopeptidase activity (GO:0004252),Molecular Function:ATP binding (GO:0005524),Biological Process:proteolysis (GO:0006508)
CAFS_HM_T_00028107	5	Molecular Function:nucleoside diphosphate kinase activity (GO:0004550),Biological Process:nucleoside diphosphate phosphorylation (GO:0006165),Biological Process:GTP biosynthetic process (GO:0006183),Biological Process:UTP biosynthetic process (GO:0006228),Biological Process:CTP biosynthetic process (GO:0006241)
CAFS_HM_T_00070417	1	Molecular Function:GTP binding (GO:0005525)
CAFS_HM_T_00085566	1	Molecular Function:GTP binding (GO:0005525)
CAFS_HM_T_00086398	--	--
CAFS_HM_T_00055568	1	Molecular Function:protein binding (GO:0005515)
CAFS_HM_T_00016669	4	Molecular Function:motor activity (GO:0003774),Molecular Function:protein binding (GO:0005515),Molecular Function:ATP binding (GO:0005524),Cellular Component:myosin complex (GO:0016459)
CAFS_HM_T_00026185	--	--
CAFS_HM_T_00070563	4	Molecular Function:antioxidant activity (GO:0016209),Molecular Function:oxidoreductase activity (GO:0016491),Molecular Function:peroxiredoxin activity (GO:0051920),Biological Process:oxidation-reduction process (GO:0055114)
CAFS_HM_T_00036429	2	Molecular Function:calcium ion binding (GO:0005509),Molecular Function:protein binding (GO:0005515)
CAFS_HM_T_00088103	2	Biological Process:ubiquitin-dependent protein catabolic process (GO:0006511),Molecular Function:ubiquitin protein ligase binding (GO:0031625)
CAFS_HM_T_00047347	5	Molecular Function:GTPase activity (GO:0003924),Molecular Function:signal transducer activity (GO:0004871),Biological Process:G-protein coupled receptor signaling pathway (GO:0007186),Molecular Function:guanyl nucleotide binding (GO:0019001),Molecular Function:G-protein beta/gamma-subunit complex binding (GO:0031683)
CAFS_HM_T_00090784	--	--
CAFS_HM_T_00036819	1	Molecular Function:protein binding (GO:0005515)
CAFS_HM_T_00008668	5	Molecular Function:electron carrier activity (GO:0009055),Molecular Function:oxidoreductase activity (GO:0016491),Molecular Function:metal ion binding (GO:0046872),Molecular Function:iron-sulfur cluster binding (GO:0051536),Biological Process:oxidation-reduction process (GO:0055114)
CAFS_HM_T_00021313	1	Molecular Function:DNA binding (GO:0003677)
CAFS_HM_T_00021481	2	Molecular Function:structural molecule activity (GO:0005198),Cellular Component:intermediate filament (GO:0005882)
CAFS_HM_T_00077024	2	Molecular Function:nucleic acid binding (GO:0003676),Molecular Function:ATP binding (GO:0005524)
CAFS_HM_T_00033619	--	--
CAFS_HM_T_00043184	3	Molecular Function:electron carrier activity (GO:0009055),Molecular Function:protein disulfide oxidoreductase activity (GO:0015035),Biological Process:cell redox homeostasis (GO:0045454)
CAFS_HM_T_00051403	1	Molecular Function:protein binding (GO:0005515)
CAFS_HM_T_00083007	2	Molecular Function:hyaluronic acid binding (GO:0005540),Biological Process:cell adhesion (GO:0007155)
CAFS_HM_T_00037299	3	Cellular Component:sodium:potassium-exchanging ATPase complex (GO:0005890),Biological Process:potassium ion transport (GO:0006813),Biological Process:sodium ion transport (GO:0006814)
CAFS_HM_T_00077233	3	Molecular Function:protein tyrosine phosphatase activity (GO:0004725),Molecular Function:protein binding (GO:0005515),Biological Process:protein dephosphorylation (GO:0006470)
CAFS_HM_T_00034200	1	Molecular Function:nucleic acid binding (GO:0003676)
CAFS_HM_T_00070491	4	Molecular Function:3-hydroxyacyl-CoA dehydrogenase activity (GO:0003857),Biological Process:fatty acid metabolic process (GO:0006631),Molecular Function:oxidoreductase activity (GO:0016491),Biological Process:oxidation-reduction process (GO:0055114)
CAFS_HM_T_00008273	1	Molecular Function:hydrolase activity (GO:0016787)
CAFS_HM_T_00057231	2	Molecular Function:structural molecule activity (GO:0005198),Cellular Component:intermediate filament (GO:0005882)
CAFS_HM_T_00034123	--	--
CAFS_HM_T_00048637	1	Molecular Function:DNA binding (GO:0003677)
CAFS_HM_T_00046804	5	Molecular Function:nucleotide binding (GO:0000166),Molecular Function:nucleic acid binding (GO:0003676),Molecular Function:aminoacyl-tRNA ligase activity (GO:0004812),Molecular Function:ATP binding (GO:0005524),Biological Process:tRNA aminoacylation for protein translation (GO:0006418)
CAFS_HM_T_00058857	--	--
CAFS_HM_T_00074064	--	--
CAFS_HM_T_00070354	3	Molecular Function:Rho guanyl-nucleotide exchange factor activity (GO:0005089),Molecular Function:protein binding (GO:0005515),Biological Process:regulation of Rho protein signal transduction (GO:0035023)
CAFS_HM_T_00055842	4	Molecular Function:dolichyl-diphosphooligosaccharide-protein glycotransferase activity (GO:0004579),Cellular Component:endoplasmic reticulum (GO:0005783),Biological Process:protein glycosylation (GO:0006486),Cellular Component:integral component of membrane (GO:0016021)
CAFS_HM_T_00047267	1	Molecular Function:protein binding (GO:0005515)
CAFS_HM_T_00034377	2	Biological Process:proteolysis (GO:0006508),Molecular Function:dipeptidase activity (GO:0016805)
CAFS_HM_T_00057190	3	Cellular Component:cytoskeleton (GO:0005856),Molecular Function:cytoskeletal protein binding (GO:0008092),Biological Process:cortical actin cytoskeleton organization (GO:0030866)
CAFS_HM_T_00082589	5	Molecular Function:glycerol-3-phosphate dehydrogenase [NAD+] activity (GO:0004367),Biological Process:carbohydrate metabolic process (GO:0005975),Biological Process:glycerol-3-phosphate catabolic process (GO:0046168),Molecular Function:NAD binding (GO:0051287),Biological Process:oxidation-reduction process (GO:0055114)
CAFS_HM_T_00067743	2	Biological Process:vesicle docking involved in exocytosis (GO:0006904),Biological Process:vesicle-mediated transport (GO:0016192)
CAFS_HM_T_00075796	--	--
CAFS_HM_T_00010074	--	--
CAFS_HM_T_00055819	2	Molecular Function:nucleic acid binding (GO:0003676),Molecular Function:ATP binding (GO:0005524)
CAFS_HM_T_00040975	2	Molecular Function:GTPase activity (GO:0003924),Molecular Function:GTP binding (GO:0005525)
CAFS_HM_T_00080016	5	Molecular Function:diacylglycerol kinase activity (GO:0004143),Molecular Function:protein binding (GO:0005515),Biological Process:protein kinase C-activating G-protein coupled receptor signaling pathway (GO:0007205),Molecular Function:kinase activity (GO:0016301),Biological Process:intracellular signal transduction (GO:0035556)
CAFS_HM_T_00037057	2	Molecular Function:nucleotide binding (GO:0000166),Molecular Function:metal ion binding (GO:0046872)
CAFS_HM_T_00054509	1	Molecular Function:protein binding (GO:0005515)
CAFS_HM_T_00009916	1	Molecular Function:calcium ion binding (GO:0005509)
CAFS_HM_T_00039756	1	Molecular Function:nucleic acid binding (GO:0003676)
CAFS_HM_T_00058016	1	Biological Process:oxidation-reduction process (GO:0055114)
CAFS_HM_T_00011843	1	Molecular Function:GTP binding (GO:0005525)
CAFS_HM_T_00051715	2	Molecular Function:catalytic activity (GO:0003824),Biological Process:carbohydrate metabolic process (GO:0005975)
CAFS_HM_T_00057675	2	Molecular Function:protein binding (GO:0005515),Cellular Component:membrane (GO:0016020)
CAFS_HM_T_00020835	4	Molecular Function:magnesium ion binding (GO:0000287),Molecular Function:inorganic diphosphatase activity (GO:0004427),Cellular Component:cytoplasm (GO:0005737),Biological Process:phosphate-containing compound metabolic process (GO:0006796)
CAFS_HM_T_00026099	1	Molecular Function:protein binding (GO:0005515)
CAFS_HM_T_00070526	2	Molecular Function:oxidoreductase activity (GO:0016491),Biological Process:oxidation-reduction process (GO:0055114)
CAFS_HM_T_00075789	3	Molecular Function:nucleic acid binding (GO:0003676),Molecular Function:helicase activity (GO:0004386),Molecular Function:ATP binding (GO:0005524)
CAFS_HM_T_00071580	2	Biological Process:carbohydrate metabolic process (GO:0005975),Biological Process:organic substance metabolic process (GO:0071704)
CAFS_HM_T_00006370	--	--
CAFS_HM_T_00049109	2	Biological Process:intracellular protein transport (GO:0006886),Molecular Function:Ran GTPase binding (GO:0008536)
CAFS_HM_T_00090003	1	Molecular Function:phosphatidylinositol binding (GO:0035091)
CAFS_HM_T_00070447	2	Molecular Function:nucleic acid binding (GO:0003676),Molecular Function:ATP binding (GO:0005524)
CAFS_HM_T_00071325	5	Molecular Function:receptor binding (GO:0005102),Cellular Component:fibrinogen complex (GO:0005577),Biological Process:signal transduction (GO:0007165),Biological Process:platelet activation (GO:0030168),Biological Process:protein polymerization (GO:0051258)
CAFS_HM_T_00028559	--	--
CAFS_HM_T_00057832	2	Molecular Function:protein binding (GO:0005515),Biological Process:signal transduction (GO:0007165)
CAFS_HM_T_00069763	6	Cellular Component:Golgi membrane (GO:0000139),Cellular Component:cytoplasm (GO:0005737),Biological Process:intracellular protein transport (GO:0006886),Molecular Function:protein transporter activity (GO:0008565),Cellular Component:membrane (GO:0016020),Biological Process:vesicle fusion with Golgi apparatus (GO:0048280)
CAFS_HM_T_00048169	--	--
CAFS_HM_T_00083362	2	Molecular Function:metalloendopeptidase activity (GO:0004222),Biological Process:proteolysis (GO:0006508)
CAFS_HM_T_00073022	1	Molecular Function:protein binding (GO:0005515)
CAFS_HM_T_00044065	2	Molecular Function:catalytic activity (GO:0003824),Molecular Function:hydrolase activity (GO:0016787)
CAFS_HM_T_00037718	--	--
CAFS_HM_T_00062655	1	Biological Process:metabolic process (GO:0008152)
CAFS_HM_T_00027820	1	Molecular Function:extracellular matrix structural constituent (GO:0005201)
CAFS_HM_T_00023085	3	Molecular Function:adenylosuccinate synthase activity (GO:0004019),Molecular Function:GTP binding (GO:0005525),Biological Process:purine nucleotide biosynthetic process (GO:0006164)
CAFS_HM_T_00090121	3	Biological Process:cell communication (GO:0007154),Cellular Component:integral component of membrane (GO:0016021),Biological Process:transmembrane transport (GO:0055085)
CAFS_HM_T_00037961	1	Molecular Function:protein binding (GO:0005515)
CAFS_HM_T_00085495	--	--
CAFS_HM_T_00034302	--	--
CAFS_HM_T_00017627	2	Molecular Function:protein binding (GO:0005515),Biological Process:signal transduction (GO:0007165)
CAFS_HM_T_00009980	3	Molecular Function:structural constituent of ribosome (GO:0003735),Cellular Component:ribosome (GO:0005840),Biological Process:translation (GO:0006412)
CAFS_HM_T_00062420	--	--
CAFS_HM_T_00015851	1	Molecular Function:tubulin binding (GO:0015631)
CAFS_HM_T_00046389	3	Molecular Function:protein tyrosine phosphatase activity (GO:0004725),Molecular Function:protein binding (GO:0005515),Biological Process:protein dephosphorylation (GO:0006470)
CAFS_HM_T_00015614	2	Molecular Function:nucleotide binding (GO:0000166),Molecular Function:metal ion binding (GO:0046872)
CAFS_HM_T_00021060	1	Molecular Function:hydrolase activity (GO:0016787)
CAFS_HM_T_00041170	--	--
CAFS_HM_T_00058496	2	Molecular Function:ARF guanyl-nucleotide exchange factor activity (GO:0005086),Biological Process:regulation of ARF protein signal transduction (GO:0032012)
CAFS_HM_T_00054819	--	--
CAFS_HM_T_00034480	--	--
CAFS_HM_T_00028841	1	Cellular Component:cytoskeleton (GO:0005856)
CAFS_HM_T_00027661	--	--
CAFS_HM_T_00008224	3	Molecular Function:endopeptidase inhibitor activity (GO:0004866),Cellular Component:extracellular region (GO:0005576),Cellular Component:extracellular space (GO:0005615)
CAFS_HM_T_00004151	1	Molecular Function:hydrolase activity (GO:0016787)
CAFS_HM_T_00077011	1	Molecular Function:RNA binding (GO:0003723)
CAFS_HM_T_00000309	4	Molecular Function:ATP binding (GO:0005524),Biological Process:protein folding (GO:0006457),Biological Process:response to stress (GO:0006950),Molecular Function:unfolded protein binding (GO:0051082)
CAFS_HM_T_00045056	--	--
CAFS_HM_T_00075342	4	Molecular Function:protein kinase activity (GO:0004672),Molecular Function:protein serine/threonine kinase activity (GO:0004674),Molecular Function:ATP binding (GO:0005524),Biological Process:protein phosphorylation (GO:0006468)
CAFS_HM_T_00055227	--	--
CAFS_HM_T_00013276	1	Molecular Function:protein binding (GO:0005515)
CAFS_HM_T_00041965	1	Molecular Function:protein binding (GO:0005515)
CAFS_HM_T_00051016	2	Molecular Function:catalytic activity (GO:0003824),Biological Process:metabolic process (GO:0008152)
CAFS_HM_T_00034784	2	Molecular Function:GTP binding (GO:0005525),Biological Process:small GTPase mediated signal transduction (GO:0007264)
CAFS_HM_T_00032670	3	Cellular Component:cytoplasm (GO:0005737),Molecular Function:cytoskeletal protein binding (GO:0008092),Cellular Component:extrinsic component of membrane (GO:0019898)
CAFS_HM_T_00008618	1	Biological Process:metabolic process (GO:0008152)
CAFS_HM_T_00001225	3	Molecular Function:endopeptidase inhibitor activity (GO:0004866),Cellular Component:extracellular region (GO:0005576),Cellular Component:extracellular space (GO:0005615)
CAFS_HM_T_00069939	1	Molecular Function:ATP binding (GO:0005524)
CAFS_HM_T_00054900	5	Molecular Function:GTPase activity (GO:0003924),Molecular Function:signal transducer activity (GO:0004871),Biological Process:G-protein coupled receptor signaling pathway (GO:0007186),Molecular Function:guanyl nucleotide binding (GO:0019001),Molecular Function:G-protein beta/gamma-subunit complex binding (GO:0031683)
CAFS_HM_T_00029151	1	Molecular Function:GTP binding (GO:0005525)
CAFS_HM_T_00049206	4	Biological Process:intracellular protein transport (GO:0006886),Biological Process:vesicle-mediated transport (GO:0016192),Cellular Component:membrane coat (GO:0030117),Cellular Component:clathrin adaptor complex (GO:0030131)
CAFS_HM_T_00059556	1	Biological Process:metabolic process (GO:0008152)
CAFS_HM_T_00077775	2	Molecular Function:protein binding (GO:0005515),Cellular Component:cytoplasm (GO:0005737)
CAFS_HM_T_00013171	--	--
CAFS_HM_T_00064934	1	Molecular Function:phosphatase activator activity (GO:0019211)
CAFS_HM_T_00064836	--	--
CAFS_HM_T_00035435	1	Molecular Function:hydrolase activity (GO:0016787)
CAFS_HM_T_00091702	4	Biological Process:intracellular protein transport (GO:0006886),Biological Process:ER to Golgi vesicle-mediated transport (GO:0006888),Molecular Function:zinc ion binding (GO:0008270),Cellular Component:COPII vesicle coat (GO:0030127)
CAFS_HM_T_00028175	2	Molecular Function:protein binding (GO:0005515),Biological Process:regulation of GTPase activity (GO:0043087)
CAFS_HM_T_00013589	1	Molecular Function:protein binding (GO:0005515)
CAFS_HM_T_00029107	2	Molecular Function:nucleic acid binding (GO:0003676),Molecular Function:RNA binding (GO:0003723)
CAFS_HM_T_00015516	3	Molecular Function:translation initiation factor activity (GO:0003743),Cellular Component:cytoplasm (GO:0005737),Cellular Component:eukaryotic translation initiation factor 3 complex (GO:0005852)
CAFS_HM_T_00055664	3	Biological Process:protein N-linked glycosylation (GO:0006487),Cellular Component:oligosaccharyltransferase complex (GO:0008250),Cellular Component:integral component of membrane (GO:0016021)
CAFS_HM_T_00010415	2	Molecular Function:protein binding (GO:0005515),Biological Process:intracellular signal transduction (GO:0035556)
CAFS_HM_T_00045863	1	Molecular Function:protein binding (GO:0005515)
CAFS_HM_T_00082500	--	--
CAFS_HM_T_00085016	--	--
CAFS_HM_T_00086665	1	Molecular Function:protein binding (GO:0005515)
CAFS_HM_T_00071211	2	Molecular Function:protein binding (GO:0005515),Cellular Component:extracellular region (GO:0005576)
CAFS_HM_T_00042260	2	Cellular Component:intracellular (GO:0005622),Biological Process:intracellular protein transport (GO:0006886)
CAFS_HM_T_00044087	1	Molecular Function:hydrolase activity (GO:0016787)
CAFS_HM_T_00065752	1	Molecular Function:RNA binding (GO:0003723)
CAFS_HM_T_00007395	3	Biological Process:superoxide metabolic process (GO:0006801),Molecular Function:metal ion binding (GO:0046872),Biological Process:oxidation-reduction process (GO:0055114)
CAFS_HM_T_00062063	2	Molecular Function:calcium ion binding (GO:0005509),Molecular Function:calcium-dependent phospholipid binding (GO:0005544)
CAFS_HM_T_00074514	2	Molecular Function:protein tyrosine phosphatase activity (GO:0004725),Biological Process:protein dephosphorylation (GO:0006470)
CAFS_HM_T_00011536	1	Molecular Function:protein binding (GO:0005515)
CAFS_HM_T_00018085	4	Molecular Function:protein kinase activity (GO:0004672),Molecular Function:protein binding (GO:0005515),Molecular Function:ATP binding (GO:0005524),Biological Process:protein phosphorylation (GO:0006468)
CAFS_HM_T_00058131	2	Molecular Function:catalytic activity (GO:0003824),Biological Process:metabolic process (GO:0008152)
CAFS_HM_T_00008246	4	Molecular Function:calcium-dependent cysteine-type endopeptidase activity (GO:0004198),Molecular Function:calcium ion binding (GO:0005509),Cellular Component:intracellular (GO:0005622),Biological Process:proteolysis (GO:0006508)
CAFS_HM_T_00019098	--	--
CAFS_HM_T_00028114	2	Biological Process:intracellular protein transport (GO:0006886),Molecular Function:Ran GTPase binding (GO:0008536)
CAFS_HM_T_00061077	1	Biological Process:metabolic process (GO:0008152)
CAFS_HM_T_00090703	3	Cellular Component:cytoplasm (GO:0005737),Molecular Function:cytoskeletal protein binding (GO:0008092),Cellular Component:extrinsic component of membrane (GO:0019898)
CAFS_HM_T_00015013	1	Molecular Function:nucleic acid binding (GO:0003676)
CAFS_HM_T_00022309	2	Molecular Function:GTPase activity (GO:0003924),Molecular Function:GTP binding (GO:0005525)
CAFS_HM_T_00005098	--	--
CAFS_HM_T_00057012	4	Molecular Function:protein binding (GO:0005515),Molecular Function:ATP binding (GO:0005524),Cellular Component:chromosome (GO:0005694),Biological Process:chromosome organization (GO:0051276)
CAFS_HM_T_00011011	--	--
CAFS_HM_T_00048401	2	Molecular Function:catalytic activity (GO:0003824),Biological Process:carbohydrate metabolic process (GO:0005975)
CAFS_HM_T_00020162	1	Molecular Function:calcium ion binding (GO:0005509)
CAFS_HM_T_00051875	2	Biological Process:ubiquitin-dependent protein catabolic process (GO:0006511),Molecular Function:ubiquitin protein ligase binding (GO:0031625)
CAFS_HM_T_00054653	1	Molecular Function:GTP binding (GO:0005525)
CAFS_HM_T_00042861	--	--
CAFS_HM_T_00027846	2	Molecular Function:nucleic acid binding (GO:0003676),Molecular Function:protein binding (GO:0005515)
CAFS_HM_T_00069351	1	Molecular Function:hydrolase activity (GO:0016787)
CAFS_HM_T_00080729	--	--
CAFS_HM_T_00076854	1	Molecular Function:GTP binding (GO:0005525)
CAFS_HM_T_00042664	2	Molecular Function:ATP binding (GO:0005524),Biological Process:tRNA aminoacylation (GO:0043039)
CAFS_HM_T_00019364	1	Molecular Function:calcium ion binding (GO:0005509)
CAFS_HM_T_00031153	--	--
CAFS_HM_T_00015619	--	--
CAFS_HM_T_00055425	1	Molecular Function:protein binding (GO:0005515)
CAFS_HM_T_00072413	1	Molecular Function:protein binding (GO:0005515)
CAFS_HM_T_00018748	1	Molecular Function:aminoacyl-tRNA hydrolase activity (GO:0004045)
CAFS_HM_T_00058811	4	Molecular Function:glucose-6-phosphate dehydrogenase activity (GO:0004345),Biological Process:glucose metabolic process (GO:0006006),Molecular Function:NADP binding (GO:0050661),Biological Process:oxidation-reduction process (GO:0055114)
CAFS_HM_T_00065804	--	--
CAFS_HM_T_00077499	2	Molecular Function:phosphatidylinositol phosphate kinase activity (GO:0016307),Biological Process:phosphatidylinositol metabolic process (GO:0046488)
CAFS_HM_T_00005902	3	Molecular Function:motor activity (GO:0003774),Molecular Function:ATP binding (GO:0005524),Cellular Component:myosin complex (GO:0016459)
CAFS_HM_T_00079530	2	Molecular Function:protein binding (GO:0005515),Cellular Component:cytoplasm (GO:0005737)
CAFS_HM_T_00053607	2	Molecular Function:protein binding (GO:0005515),Biological Process:signal transduction (GO:0007165)
CAFS_HM_T_00070298	3	Molecular Function:catalytic activity (GO:0003824),Biological Process:metabolic process (GO:0008152),Molecular Function:cofactor binding (GO:0048037)
CAFS_HM_T_00026076	5	Molecular Function:GTPase activity (GO:0003924),Molecular Function:signal transducer activity (GO:0004871),Biological Process:G-protein coupled receptor signaling pathway (GO:0007186),Molecular Function:guanyl nucleotide binding (GO:0019001),Molecular Function:G-protein beta/gamma-subunit complex binding (GO:0031683)
CAFS_HM_T_00058233	3	Molecular Function:phosphogluconate dehydrogenase (decarboxylating) activity (GO:0004616),Biological Process:pentose-phosphate shunt (GO:0006098),Biological Process:oxidation-reduction process (GO:0055114)
CAFS_HM_T_00010891	--	--
CAFS_HM_T_00035269	1	Molecular Function:hydrolase activity (GO:0016787)
CAFS_HM_T_00016637	--	--
CAFS_HM_T_00080753	--	--
CAFS_HM_T_00001696	--	--
CAFS_HM_T_00048124	2	Molecular Function:GTP binding (GO:0005525),Biological Process:small GTPase mediated signal transduction (GO:0007264)
CAFS_HM_T_00019875	--	--
CAFS_HM_T_00053257	--	--
CAFS_HM_T_00068196	3	Molecular Function:GTP binding (GO:0005525),Biological Process:signal transduction (GO:0007165),Biological Process:small GTPase mediated signal transduction (GO:0007264)
CAFS_HM_T_00058247	5	Molecular Function:microtubule motor activity (GO:0003777),Molecular Function:protein binding (GO:0005515),Molecular Function:ATP binding (GO:0005524),Biological Process:microtubule-based movement (GO:0007018),Molecular Function:microtubule binding (GO:0008017)
CAFS_HM_T_00033384	1	Molecular Function:protein binding (GO:0005515)
CAFS_HM_T_00009902	--	--
CAFS_HM_T_00021360	1	Molecular Function:protein binding (GO:0005515)
CAFS_HM_T_00028027	1	Molecular Function:hydrolase activity (GO:0016787)
CAFS_HM_T_00047183	1	Molecular Function:protein binding (GO:0005515)
CAFS_HM_T_00076554	2	Molecular Function:catalytic activity (GO:0003824),Biological Process:metabolic process (GO:0008152)
CAFS_HM_T_00077616	4	Molecular Function:acyl-CoA dehydrogenase activity (GO:0003995),Biological Process:metabolic process (GO:0008152),Molecular Function:flavin adenine dinucleotide binding (GO:0050660),Biological Process:oxidation-reduction process (GO:0055114)
CAFS_HM_T_00017517	5	Molecular Function:protein kinase activity (GO:0004672),Molecular Function:protein serine/threonine kinase activity (GO:0004674),Molecular Function:ATP binding (GO:0005524),Biological Process:protein phosphorylation (GO:0006468),Biological Process:intracellular signal transduction (GO:0035556)
CAFS_HM_T_00055320	1	Molecular Function:protein binding (GO:0005515)
CAFS_HM_T_00017031	3	Molecular Function:glutamate-ammonia ligase activity (GO:0004356),Biological Process:glutamine biosynthetic process (GO:0006542),Biological Process:nitrogen compound metabolic process (GO:0006807)
CAFS_HM_T_00083467	1	Molecular Function:protein binding (GO:0005515)
CAFS_HM_T_00075842	--	--
CAFS_HM_T_00064310	1	Molecular Function:protein binding (GO:0005515)
CAFS_HM_T_00024520	2	Molecular Function:protein binding (GO:0005515),Cellular Component:membrane (GO:0016020)
CAFS_HM_T_00034495	1	Molecular Function:ATP binding (GO:0005524)
CAFS_HM_T_00015238	6	Molecular Function:protein kinase activity (GO:0004672),Molecular Function:protein serine/threonine kinase activity (GO:0004674),Molecular Function:protein binding (GO:0005515),Molecular Function:ATP binding (GO:0005524),Biological Process:protein phosphorylation (GO:0006468),Biological Process:intracellular signal transduction (GO:0035556)
CAFS_HM_T_00080480	1	Molecular Function:3-hydroxyisobutyryl-CoA hydrolase activity (GO:0003860)
CAFS_HM_T_00009572	5	Molecular Function:nucleotide binding (GO:0000166),Molecular Function:aminoacyl-tRNA ligase activity (GO:0004812),Molecular Function:ATP binding (GO:0005524),Biological Process:tRNA aminoacylation for protein translation (GO:0006418),Biological Process:tRNA aminoacylation (GO:0043039)
CAFS_HM_T_00073885	--	--
CAFS_HM_T_00069036	1	Molecular Function:protein binding (GO:0005515)
CAFS_HM_T_00021812	--	--
CAFS_HM_T_00046251	1	Cellular Component:nucleus (GO:0005634)
CAFS_HM_T_00083590	2	Molecular Function:nucleic acid binding (GO:0003676),Molecular Function:protein binding (GO:0005515)
CAFS_HM_T_00064173	1	Molecular Function:protein binding (GO:0005515)
CAFS_HM_T_00022776	2	Molecular Function:catalytic activity (GO:0003824),Biological Process:metabolic process (GO:0008152)
CAFS_HM_T_00040827	--	--
CAFS_HM_T_00019838	5	Molecular Function:GTPase activity (GO:0003924),Molecular Function:signal transducer activity (GO:0004871),Biological Process:G-protein coupled receptor signaling pathway (GO:0007186),Molecular Function:guanyl nucleotide binding (GO:0019001),Molecular Function:G-protein beta/gamma-subunit complex binding (GO:0031683)
CAFS_HM_T_00074762	--	--
CAFS_HM_T_00028202	1	Molecular Function:protein binding (GO:0005515)
CAFS_HM_T_00021273	4	Molecular Function:calcium-dependent cysteine-type endopeptidase activity (GO:0004198),Molecular Function:calcium ion binding (GO:0005509),Cellular Component:intracellular (GO:0005622),Biological Process:proteolysis (GO:0006508)
CAFS_HM_T_00087516	--	--
CAFS_HM_T_00065878	1	Molecular Function:protein binding (GO:0005515)
CAFS_HM_T_00037469	3	Molecular Function:translation elongation factor activity (GO:0003746),Molecular Function:protein binding (GO:0005515),Biological Process:translational elongation (GO:0006414)
CAFS_HM_T_00083408	2	Molecular Function:protein binding (GO:0005515),Biological Process:regulation of GTPase activity (GO:0043087)
CAFS_HM_T_00011334	5	Molecular Function:GTPase activity (GO:0003924),Molecular Function:signal transducer activity (GO:0004871),Biological Process:G-protein coupled receptor signaling pathway (GO:0007186),Molecular Function:guanyl nucleotide binding (GO:0019001),Molecular Function:G-protein beta/gamma-subunit complex binding (GO:0031683)
CAFS_HM_T_00048449	2	Molecular Function:glycerone kinase activity (GO:0004371),Biological Process:glycerol metabolic process (GO:0006071)
CAFS_HM_T_00069120	1	Molecular Function:protein binding (GO:0005515)
CAFS_HM_T_00000158	--	--
CAFS_HM_T_00030647	2	Molecular Function:GTP binding (GO:0005525),Biological Process:small GTPase mediated signal transduction (GO:0007264)
CAFS_HM_T_00006604	1	Molecular Function:cysteine-type endopeptidase inhibitor activity (GO:0004869)
CAFS_HM_T_00085525	2	Molecular Function:GTP binding (GO:0005525),Biological Process:small GTPase mediated signal transduction (GO:0007264)
CAFS_HM_T_00065545	1	Molecular Function:nucleic acid binding (GO:0003676)
CAFS_HM_T_00069966	2	Molecular Function:GTP binding (GO:0005525),Biological Process:small GTPase mediated signal transduction (GO:0007264)
CAFS_HM_T_00067100	2	Molecular Function:phospholipase activity (GO:0004620),Biological Process:phospholipid catabolic process (GO:0009395)
CAFS_HM_T_00038958	--	--
CAFS_HM_T_00019699	2	Cellular Component:F-actin capping protein complex (GO:0008290),Biological Process:barbed-end actin filament capping (GO:0051016)
CAFS_HM_T_00083074	--	--
CAFS_HM_T_00085009	--	--
CAFS_HM_T_00015969	2	Molecular Function:nucleic acid binding (GO:0003676),Molecular Function:ATP binding (GO:0005524)
CAFS_HM_T_00052115	6	Molecular Function:purinergic nucleotide receptor activity (GO:0001614),Molecular Function:extracellular ATP-gated cation channel activity (GO:0004931),Cellular Component:integral component of plasma membrane (GO:0005887),Biological Process:response to ATP (GO:0033198),Biological Process:oxidation-reduction process (GO:0055114),Biological Process:cation transmembrane transport (GO:0098655)
CAFS_HM_T_00026039	1	Biological Process:ATP synthesis coupled proton transport (GO:0015986)
CAFS_HM_T_00071666	3	Molecular Function:ionotropic glutamate receptor activity (GO:0004970),Molecular Function:extracellular-glutamate-gated ion channel activity (GO:0005234),Cellular Component:membrane (GO:0016020)
CAFS_HM_T_00084142	3	Molecular Function:phosphogluconate dehydrogenase (decarboxylating) activity (GO:0004616),Molecular Function:NAD binding (GO:0051287),Biological Process:oxidation-reduction process (GO:0055114)
CAFS_HM_T_00077290	--	--
CAFS_HM_T_00038524	1	Molecular Function:GTP binding (GO:0005525)
CAFS_HM_T_00059792	2	Molecular Function:ARF guanyl-nucleotide exchange factor activity (GO:0005086),Biological Process:regulation of ARF protein signal transduction (GO:0032012)
CAFS_HM_T_00014168	2	Biological Process:biosynthetic process (GO:0009058),Molecular Function:pyridoxal phosphate binding (GO:0030170)
CAFS_HM_T_00063775	1	Cellular Component:outer membrane (GO:0019867)
CAFS_HM_T_00038304	5	Molecular Function:transporter activity (GO:0005215),Biological Process:transport (GO:0006810),Biological Process:ion transport (GO:0006811),Cellular Component:membrane (GO:0016020),Biological Process:transmembrane transport (GO:0055085)
CAFS_HM_T_00053755	2	Molecular Function:GTP binding (GO:0005525),Biological Process:small GTPase mediated signal transduction (GO:0007264)
CAFS_HM_T_00022484	4	Molecular Function:magnesium ion binding (GO:0000287),Molecular Function:catalytic activity (GO:0003824),Molecular Function:phosphoprotein phosphatase activity (GO:0004721),Molecular Function:manganese ion binding (GO:0030145)
CAFS_HM_T_00041987	1	Biological Process:carbohydrate metabolic process (GO:0005975)
CAFS_HM_T_00021839	--	--
CAFS_HM_T_00034287	3	Molecular Function:calcium ion binding (GO:0005509),Biological Process:homophilic cell adhesion via plasma membrane adhesion molecules (GO:0007156),Cellular Component:membrane (GO:0016020)
CAFS_HM_T_00030521	--	--
CAFS_HM_T_00017479	2	Molecular Function:structural molecule activity (GO:0005198),Cellular Component:intermediate filament (GO:0005882)
CAFS_HM_T_00086755	4	Molecular Function:motor activity (GO:0003774),Molecular Function:protein binding (GO:0005515),Molecular Function:ATP binding (GO:0005524),Cellular Component:myosin complex (GO:0016459)
CAFS_HM_T_00051455	2	Molecular Function:fructose-bisphosphate aldolase activity (GO:0004332),Biological Process:glycolytic process (GO:0006096)
CAFS_HM_T_00084358	3	Molecular Function:protein kinase activity (GO:0004672),Molecular Function:ATP binding (GO:0005524),Biological Process:protein phosphorylation (GO:0006468)
CAFS_HM_T_00044247	1	Molecular Function:protein binding (GO:0005515)
CAFS_HM_T_00088720	3	Molecular Function:GTP binding (GO:0005525),Biological Process:signal transduction (GO:0007165),Biological Process:small GTPase mediated signal transduction (GO:0007264)
CAFS_HM_T_00027515	2	Molecular Function:nucleic acid binding (GO:0003676),Molecular Function:ATP binding (GO:0005524)
CAFS_HM_T_00068410	--	--
CAFS_HM_T_00045723	--	--
CAFS_HM_T_00033843	--	--
CAFS_HM_T_00066835	2	Molecular Function:GTP binding (GO:0005525),Biological Process:small GTPase mediated signal transduction (GO:0007264)
CAFS_HM_T_00019974	1	Molecular Function:transferase activity (GO:0016740)
CAFS_HM_T_00080071	--	--
CAFS_HM_T_00059358	--	--
CAFS_HM_T_00054757	2	Molecular Function:GTP binding (GO:0005525),Biological Process:small GTPase mediated signal transduction (GO:0007264)
CAFS_HM_T_00027779	1	Molecular Function:nucleic acid binding (GO:0003676)
CAFS_HM_T_00070626	--	--
CAFS_HM_T_00060472	--	--
CAFS_HM_T_00042037	--	--
CAFS_HM_T_00008889	1	Molecular Function:GTP binding (GO:0005525)
CAFS_HM_T_00009213	4	Molecular Function:acyl-CoA dehydrogenase activity (GO:0003995),Biological Process:metabolic process (GO:0008152),Molecular Function:flavin adenine dinucleotide binding (GO:0050660),Biological Process:oxidation-reduction process (GO:0055114)
CAFS_HM_T_00090222	2	Molecular Function:oxidoreductase activity (GO:0016491),Biological Process:oxidation-reduction process (GO:0055114)
CAFS_HM_T_00058644	2	Molecular Function:GTP binding (GO:0005525),Biological Process:small GTPase mediated signal transduction (GO:0007264)
CAFS_HM_T_00037508	1	Molecular Function:nucleic acid binding (GO:0003676)
CAFS_HM_T_00074958	4	Molecular Function:antioxidant activity (GO:0016209),Molecular Function:oxidoreductase activity (GO:0016491),Molecular Function:peroxiredoxin activity (GO:0051920),Biological Process:oxidation-reduction process (GO:0055114)
CAFS_HM_T_00064199	5	Molecular Function:endopeptidase activity (GO:0004175),Molecular Function:threonine-type endopeptidase activity (GO:0004298),Cellular Component:proteasome core complex (GO:0005839),Biological Process:ubiquitin-dependent protein catabolic process (GO:0006511),Biological Process:proteolysis involved in cellular protein catabolic process (GO:0051603)
CAFS_HM_T_00070481	1	Molecular Function:sulfate adenylyltransferase (ATP) activity (GO:0004781)
CAFS_HM_T_00082931	3	Molecular Function:protein kinase activity (GO:0004672),Molecular Function:ATP binding (GO:0005524),Biological Process:protein phosphorylation (GO:0006468)
CAFS_HM_T_00036935	2	Biological Process:cell adhesion (GO:0007155),Molecular Function:actin filament binding (GO:0051015)
CAFS_HM_T_00009647	4	Molecular Function:GMP synthase (glutamine-hydrolyzing) activity (GO:0003922),Molecular Function:ATP binding (GO:0005524),Biological Process:purine nucleotide biosynthetic process (GO:0006164),Biological Process:GMP biosynthetic process (GO:0006177)
CAFS_HM_T_00056263	2	Molecular Function:protein binding (GO:0005515),Cellular Component:membrane (GO:0016020)
CAFS_HM_T_00033330	--	--
CAFS_HM_T_00090195	2	Biological Process:intracellular protein transport (GO:0006886),Molecular Function:Ran GTPase binding (GO:0008536)
CAFS_HM_T_00002780	--	--
CAFS_HM_T_00058055	--	--
CAFS_HM_T_00035442	1	Molecular Function:GTP binding (GO:0005525)
CAFS_HM_T_00007130	5	Molecular Function:GTPase activity (GO:0003924),Molecular Function:signal transducer activity (GO:0004871),Biological Process:G-protein coupled receptor signaling pathway (GO:0007186),Molecular Function:guanyl nucleotide binding (GO:0019001),Molecular Function:G-protein beta/gamma-subunit complex binding (GO:0031683)
CAFS_HM_T_00007115	--	--
CAFS_HM_T_00052068	--	--
CAFS_HM_T_00079213	2	Molecular Function:nucleic acid binding (GO:0003676),Molecular Function:ATP binding (GO:0005524)
CAFS_HM_T_00049442	1	Molecular Function:GTP binding (GO:0005525)
CAFS_HM_T_00072126	2	Biological Process:intracellular protein transport (GO:0006886),Molecular Function:Ran GTPase binding (GO:0008536)
CAFS_HM_T_00029757	1	Molecular Function:palmitoyl hydrolase activity (GO:0098599)
CAFS_HM_T_00063294	2	Molecular Function:GTP binding (GO:0005525),Biological Process:small GTPase mediated signal transduction (GO:0007264)
CAFS_HM_T_00057814	--	--
CAFS_HM_T_00036660	1	Biological Process:carbohydrate metabolic process (GO:0005975)
CAFS_HM_T_00063501	1	Biological Process:oxidation-reduction process (GO:0055114)
CAFS_HM_T_00090410	4	Molecular Function:acyl-CoA dehydrogenase activity (GO:0003995),Biological Process:metabolic process (GO:0008152),Molecular Function:flavin adenine dinucleotide binding (GO:0050660),Biological Process:oxidation-reduction process (GO:0055114)
CAFS_HM_T_00004093	--	--
CAFS_HM_T_00003554	1	Molecular Function:ATP binding (GO:0005524)
CAFS_HM_T_00008117	5	Molecular Function:glycerol-3-phosphate dehydrogenase [NAD+] activity (GO:0004367),Biological Process:carbohydrate metabolic process (GO:0005975),Biological Process:glycerol-3-phosphate catabolic process (GO:0046168),Molecular Function:NAD binding (GO:0051287),Biological Process:oxidation-reduction process (GO:0055114)
CAFS_HM_T_00060556	--	--
CAFS_HM_T_00021106	3	Biological Process:cellular amino acid metabolic process (GO:0006520),Molecular Function:oxidoreductase activity (GO:0016491),Biological Process:oxidation-reduction process (GO:0055114)
CAFS_HM_T_00058271	3	Molecular Function:calcium ion binding (GO:0005509),Biological Process:homophilic cell adhesion via plasma membrane adhesion molecules (GO:0007156),Cellular Component:membrane (GO:0016020)
CAFS_HM_T_00071010	1	Molecular Function:calcium ion binding (GO:0005509)
CAFS_HM_T_00069393	3	Molecular Function:argininosuccinate synthase activity (GO:0004055),Molecular Function:ATP binding (GO:0005524),Biological Process:arginine biosynthetic process (GO:0006526)
CAFS_HM_T_00056866	2	Biological Process:vesicle docking involved in exocytosis (GO:0006904),Biological Process:vesicle-mediated transport (GO:0016192)
CAFS_HM_T_00005939	2	Molecular Function:GTP binding (GO:0005525),Biological Process:small GTPase mediated signal transduction (GO:0007264)
CAFS_HM_T_00049273	3	Molecular Function:nucleic acid binding (GO:0003676),Molecular Function:helicase activity (GO:0004386),Molecular Function:ATP binding (GO:0005524)
CAFS_HM_T_00018426	--	--
CAFS_HM_T_00040868	2	Biological Process:proteolysis (GO:0006508),Molecular Function:serine-type peptidase activity (GO:0008236)
CAFS_HM_T_00064081	1	Molecular Function:protein binding (GO:0005515)
CAFS_HM_T_00045822	1	Molecular Function:RNA binding (GO:0003723)
CAFS_HM_T_00028048	2	Molecular Function:actin binding (GO:0003779),Biological Process:cytoskeleton organization (GO:0007010)
CAFS_HM_T_00060340	3	Molecular Function:fatty-acyl-CoA binding (GO:0000062),Molecular Function:catalytic activity (GO:0003824),Biological Process:metabolic process (GO:0008152)
CAFS_HM_T_00057848	1	Molecular Function:protein binding (GO:0005515)
CAFS_HM_T_00064932	1	Molecular Function:protein binding (GO:0005515)
CAFS_HM_T_00067653	2	Molecular Function:protein binding (GO:0005515),Molecular Function:metal ion binding (GO:0046872)
CAFS_HM_T_00007967	2	Molecular Function:GTP binding (GO:0005525),Biological Process:small GTPase mediated signal transduction (GO:0007264)
CAFS_HM_T_00001305	1	Biological Process:cellular metabolic process (GO:0044237)
CAFS_HM_T_00067348	--	--
CAFS_HM_T_00035338	2	Biological Process:neurotransmitter transport (GO:0006836),Molecular Function:syntaxin binding (GO:0019905)
CAFS_HM_T_00071403	1	Biological Process:carbohydrate biosynthetic process (GO:0016051)
CAFS_HM_T_00075301	2	Molecular Function:GTP binding (GO:0005525),Biological Process:small GTPase mediated signal transduction (GO:0007264)
CAFS_HM_T_00018477	--	--
CAFS_HM_T_00068756	1	Cellular Component:nucleus (GO:0005634)
CAFS_HM_T_00081382	--	--
CAFS_HM_T_00065561	1	Molecular Function:protein binding (GO:0005515)
CAFS_HM_T_00029239	2	Molecular Function:asparagine synthase (glutamine-hydrolyzing) activity (GO:0004066),Biological Process:asparagine biosynthetic process (GO:0006529)
CAFS_HM_T_00001865	5	Molecular Function:endopeptidase activity (GO:0004175),Molecular Function:threonine-type endopeptidase activity (GO:0004298),Cellular Component:proteasome core complex (GO:0005839),Biological Process:ubiquitin-dependent protein catabolic process (GO:0006511),Biological Process:proteolysis involved in cellular protein catabolic process (GO:0051603)
CAFS_HM_T_00086776	1	Molecular Function:RNA binding (GO:0003723)
CAFS_HM_T_00057694	--	--
CAFS_HM_T_00071700	3	Molecular Function:thiol-dependent ubiquitin-specific protease activity (GO:0004843),Cellular Component:intracellular (GO:0005622),Biological Process:ubiquitin-dependent protein catabolic process (GO:0006511)
CAFS_HM_T_00017229	1	Molecular Function:protein binding (GO:0005515)
CAFS_HM_T_00010396	3	Molecular Function:protein kinase activity (GO:0004672),Molecular Function:ATP binding (GO:0005524),Biological Process:protein phosphorylation (GO:0006468)
CAFS_HM_T_00004595	1	Molecular Function:nucleic acid binding (GO:0003676)
CAFS_HM_T_00027584	5	Molecular Function:tRNA binding (GO:0000049),Molecular Function:nucleotide binding (GO:0000166),Molecular Function:aminoacyl-tRNA ligase activity (GO:0004812),Molecular Function:ATP binding (GO:0005524),Biological Process:tRNA aminoacylation for protein translation (GO:0006418)
CAFS_HM_T_00039947	2	Molecular Function:protein binding (GO:0005515),Cellular Component:membrane (GO:0016020)
CAFS_HM_T_00024315	2	Molecular Function:GTP binding (GO:0005525),Biological Process:small GTPase mediated signal transduction (GO:0007264)
CAFS_HM_T_00081886	3	Molecular Function:protein binding (GO:0005515),Molecular Function:metal ion binding (GO:0046872),Biological Process:oxidation-reduction process (GO:0055114)
CAFS_HM_T_00075094	1	Biological Process:oxidation-reduction process (GO:0055114)
CAFS_HM_T_00065234	1	Molecular Function:hydrolase activity (GO:0016787)
CAFS_HM_T_00052341	3	Molecular Function:protein kinase activity (GO:0004672),Molecular Function:ATP binding (GO:0005524),Biological Process:protein phosphorylation (GO:0006468)
CAFS_HM_T_00030479	3	Cellular Component:integral component of membrane (GO:0016021),Molecular Function:transmembrane transporter activity (GO:0022857),Biological Process:transmembrane transport (GO:0055085)
CAFS_HM_T_00002484	--	--
CAFS_HM_T_00059330	1	Molecular Function:protein binding (GO:0005515)
CAFS_HM_T_00003515	--	--
CAFS_HM_T_00057251	2	Molecular Function:protein binding (GO:0005515),Molecular Function:microtubule binding (GO:0008017)
CAFS_HM_T_00062017	1	Molecular Function:protein binding (GO:0005515)
CAFS_HM_T_00068317	--	--
CAFS_HM_T_00061653	--	--
CAFS_HM_T_00039282	3	Molecular Function:protein kinase activity (GO:0004672),Molecular Function:ATP binding (GO:0005524),Biological Process:protein phosphorylation (GO:0006468)
CAFS_HM_T_00052124	1	Molecular Function:protein binding (GO:0005515)
CAFS_HM_T_00013500	2	Molecular Function:nucleic acid binding (GO:0003676),Molecular Function:ATP binding (GO:0005524)
CAFS_HM_T_00035881	2	Molecular Function:GTP binding (GO:0005525),Biological Process:small GTPase mediated signal transduction (GO:0007264)
CAFS_HM_T_00084561	--	--
CAFS_HM_T_00060807	2	Molecular Function:asparagine synthase (glutamine-hydrolyzing) activity (GO:0004066),Biological Process:asparagine biosynthetic process (GO:0006529)
CAFS_HM_T_00035168	1	Molecular Function:catalytic activity (GO:0003824)
CAFS_HM_T_00040808	--	--
CAFS_HM_T_00077479	5	Molecular Function:metalloendopeptidase activity (GO:0004222),Molecular Function:ATP binding (GO:0005524),Biological Process:proteolysis (GO:0006508),Molecular Function:zinc ion binding (GO:0008270),Cellular Component:integral component of membrane (GO:0016021)
CAFS_HM_T_00074024	3	Molecular Function:inositol-3-phosphate synthase activity (GO:0004512),Biological Process:inositol biosynthetic process (GO:0006021),Biological Process:phospholipid biosynthetic process (GO:0008654)
CAFS_HM_T_00023055	4	Molecular Function:magnesium ion binding (GO:0000287),Molecular Function:catalytic activity (GO:0003824),Molecular Function:phosphoprotein phosphatase activity (GO:0004721),Molecular Function:manganese ion binding (GO:0030145)
CAFS_HM_T_00003706	2	Molecular Function:catalytic activity (GO:0003824),Biological Process:metabolic process (GO:0008152)
CAFS_HM_T_00065057	2	Molecular Function:protein binding (GO:0005515),Cellular Component:cytoplasm (GO:0005737)
CAFS_HM_T_00013105	--	--
CAFS_HM_T_00026905	--	--
CAFS_HM_T_00015700	2	Molecular Function:glycogen (starch) synthase activity (GO:0004373),Biological Process:glycogen biosynthetic process (GO:0005978)
CAFS_HM_T_00091950	2	Molecular Function:protein binding (GO:0005515),Biological Process:signal transduction (GO:0007165)
CAFS_HM_T_00052674	1	Molecular Function:protein binding (GO:0005515)
CAFS_HM_T_00054461	2	Molecular Function:nucleic acid binding (GO:0003676),Molecular Function:ATP binding (GO:0005524)
CAFS_HM_T_00044586	2	Molecular Function:heat shock protein binding (GO:0031072),Molecular Function:unfolded protein binding (GO:0051082)
CAFS_HM_T_00069052	--	--
CAFS_HM_T_00022859	--	--
CAFS_HM_T_00069151	1	Molecular Function:protein binding (GO:0005515)
CAFS_HM_T_00057886	3	Molecular Function:structural constituent of ribosome (GO:0003735),Cellular Component:ribosome (GO:0005840),Biological Process:translation (GO:0006412)
CAFS_HM_T_00010640	2	Molecular Function:nucleic acid binding (GO:0003676),Molecular Function:ATP binding (GO:0005524)
CAFS_HM_T_00080339	3	Molecular Function:RNA binding (GO:0003723),Molecular Function:adenosine deaminase activity (GO:0004000),Biological Process:RNA processing (GO:0006396)
CAFS_HM_T_00054386	1	Molecular Function:small protein activating enzyme activity (GO:0008641)
CAFS_HM_T_00024150	--	--
CAFS_HM_T_00013218	5	Molecular Function:GTPase activity (GO:0003924),Molecular Function:signal transducer activity (GO:0004871),Biological Process:G-protein coupled receptor signaling pathway (GO:0007186),Molecular Function:guanyl nucleotide binding (GO:0019001),Molecular Function:G-protein beta/gamma-subunit complex binding (GO:0031683)
CAFS_HM_T_00038801	2	Molecular Function:GTP binding (GO:0005525),Biological Process:small GTPase mediated signal transduction (GO:0007264)
CAFS_HM_T_00071645	3	Molecular Function:metallocarboxypeptidase activity (GO:0004181),Biological Process:proteolysis (GO:0006508),Molecular Function:zinc ion binding (GO:0008270)
CAFS_HM_T_00024819	--	--
CAFS_HM_T_00046811	1	Molecular Function:protein binding (GO:0005515)
CAFS_HM_T_00086333	3	Molecular Function:catalytic activity (GO:0003824),Biological Process:carbohydrate metabolic process (GO:0005975),Molecular Function:cation binding (GO:0043169)
CAFS_HM_T_00064807	3	Molecular Function:acetyl-CoA carboxylase activity (GO:0003989),Molecular Function:ATP binding (GO:0005524),Biological Process:fatty acid biosynthetic process (GO:0006633)
CAFS_HM_T_00040110	1	Molecular Function:kinase activity (GO:0016301)
CAFS_HM_T_00008455	2	Molecular Function:protein binding (GO:0005515),Biological Process:intracellular signal transduction (GO:0035556)
CAFS_HM_T_00040458	2	Molecular Function:GTP binding (GO:0005525),Biological Process:small GTPase mediated signal transduction (GO:0007264)
CAFS_HM_T_00018258	3	Molecular Function:aminopeptidase activity (GO:0004177),Biological Process:proteolysis (GO:0006508),Molecular Function:zinc ion binding (GO:0008270)
CAFS_HM_T_00010553	--	--
CAFS_HM_T_00082867	2	Molecular Function:GTP binding (GO:0005525),Biological Process:small GTPase mediated signal transduction (GO:0007264)
CAFS_HM_T_00017543	2	Molecular Function:DNA helicase activity (GO:0003678),Molecular Function:ATP binding (GO:0005524)
CAFS_HM_T_00063839	--	--
CAFS_HM_T_00081805	2	Molecular Function:ATP binding (GO:0005524),Molecular Function:ATPase activity (GO:0016887)
CAFS_HM_T_00083596	2	Molecular Function:nucleic acid binding (GO:0003676),Molecular Function:protein binding (GO:0005515)
CAFS_HM_T_00022652	2	Molecular Function:structural molecule activity (GO:0005198),Cellular Component:intermediate filament (GO:0005882)
CAFS_HM_T_00080803	--	--
CAFS_HM_T_00071366	1	Molecular Function:nucleic acid binding (GO:0003676)
CAFS_HM_T_00089312	1	Molecular Function:nucleic acid binding (GO:0003676)
CAFS_HM_T_00047035	2	Molecular Function:NADH dehydrogenase (ubiquinone) activity (GO:0008137),Biological Process:oxidation-reduction process (GO:0055114)
CAFS_HM_T_00053199	1	Molecular Function:GTP binding (GO:0005525)
CAFS_HM_T_00034491	--	--
CAFS_HM_T_00087652	2	Molecular Function:protein binding (GO:0005515),Molecular Function:hydrolase activity (GO:0016787)
CAFS_HM_T_00026816	2	Biological Process:RNA processing (GO:0006396),Molecular Function:RNA ligase activity (GO:0008452)
CAFS_HM_T_00026622	2	Molecular Function:protein binding (GO:0005515),Cellular Component:cytoplasm (GO:0005737)
CAFS_HM_T_00003262	3	Cellular Component:intracellular (GO:0005622),Biological Process:transport (GO:0006810),Molecular Function:metal ion binding (GO:0046872)
CAFS_HM_T_00057816	--	--
CAFS_HM_T_00028541	1	Molecular Function:protein binding (GO:0005515)
CAFS_HM_T_00046461	1	Molecular Function:protein binding (GO:0005515)
CAFS_HM_T_00004443	2	Molecular Function:GTP binding (GO:0005525),Biological Process:small GTPase mediated signal transduction (GO:0007264)
CAFS_HM_T_00063863	1	Biological Process:ATP hydrolysis coupled proton transport (GO:0015991)
CAFS_HM_T_00027096	1	Cellular Component:presynaptic active zone (GO:0048786)
CAFS_HM_T_00016071	1	Molecular Function:protein binding (GO:0005515)
CAFS_HM_T_00058261	5	Cellular Component:ubiquitin ligase complex (GO:0000151),Molecular Function:ubiquitin-protein transferase activity (GO:0004842),Biological Process:ubiquitin-dependent protein catabolic process (GO:0006511),Biological Process:protein ubiquitination (GO:0016567),Molecular Function:ubiquitin-ubiquitin ligase activity (GO:0034450)
CAFS_HM_T_00040831	8	Molecular Function:nucleotide binding (GO:0000166),Molecular Function:aminoacyl-tRNA ligase activity (GO:0004812),Molecular Function:glutamine-tRNA ligase activity (GO:0004819),Molecular Function:ATP binding (GO:0005524),Cellular Component:cytoplasm (GO:0005737),Biological Process:tRNA aminoacylation for protein translation (GO:0006418),Biological Process:glutaminyl-tRNA aminoacylation (GO:000642…
CAFS_HM_T_00019321	2	Molecular Function:structural molecule activity (GO:0005198),Cellular Component:intermediate filament (GO:0005882)
CAFS_HM_T_00056681	1	Molecular Function:calcium ion binding (GO:0005509)
CAFS_HM_T_00038172	2	Molecular Function:GTP binding (GO:0005525),Biological Process:small GTPase mediated signal transduction (GO:0007264)
CAFS_HM_T_00074421	--	--
CAFS_HM_T_00061120	1	Biological Process:cell redox homeostasis (GO:0045454)
CAFS_HM_T_00038243	2	Molecular Function:DNA binding (GO:0003677),Cellular Component:nucleus (GO:0005634)
CAFS_HM_T_00032486	5	Molecular Function:protein kinase activity (GO:0004672),Molecular Function:protein serine/threonine kinase activity (GO:0004674),Molecular Function:ATP binding (GO:0005524),Biological Process:protein phosphorylation (GO:0006468),Biological Process:intracellular signal transduction (GO:0035556)
CAFS_HM_T_00036799	--	--
CAFS_HM_T_00078440	4	Cellular Component:Arp2/3 protein complex (GO:0005885),Cellular Component:actin cytoskeleton (GO:0015629),Biological Process:regulation of actin filament polymerization (GO:0030833),Biological Process:Arp2/3 complex-mediated actin nucleation (GO:0034314)
CAFS_HM_T_00078779	4	Molecular Function:3-hydroxyacyl-CoA dehydrogenase activity (GO:0003857),Biological Process:fatty acid metabolic process (GO:0006631),Molecular Function:oxidoreductase activity (GO:0016491),Biological Process:oxidation-reduction process (GO:0055114)
CAFS_HM_T_00076681	--	--
CAFS_HM_T_00043172	--	--
CAFS_HM_T_00018111	2	Biological Process:protein deubiquitination (GO:0016579),Molecular Function:thiol-dependent ubiquitinyl hydrolase activity (GO:0036459)
CAFS_HM_T_00055172	3	Molecular Function:ionotropic glutamate receptor activity (GO:0004970),Molecular Function:extracellular-glutamate-gated ion channel activity (GO:0005234),Cellular Component:membrane (GO:0016020)
CAFS_HM_T_00032155	--	--
CAFS_HM_T_00006976	1	Molecular Function:protein binding (GO:0005515)
CAFS_HM_T_00085985	3	Molecular Function:FMN binding (GO:0010181),Molecular Function:oxidoreductase activity (GO:0016491),Biological Process:oxidation-reduction process (GO:0055114)
CAFS_HM_T_00055542	3	Biological Process:anion transport (GO:0006820),Molecular Function:anion transmembrane transporter activity (GO:0008509),Cellular Component:integral component of membrane (GO:0016021)
CAFS_HM_T_00007284	2	Cellular Component:integral component of membrane (GO:0016021),Biological Process:vesicle-mediated transport (GO:0016192)
CAFS_HM_T_00061271	--	--
CAFS_HM_T_00090359	1	Molecular Function:protein binding (GO:0005515)
CAFS_HM_T_00068186	1	Molecular Function:protein binding (GO:0005515)
CAFS_HM_T_00029017	5	Molecular Function:DNA binding (GO:0003677),Molecular Function:DNA topoisomerase type II (ATP-hydrolyzing) activity (GO:0003918),Molecular Function:ATP binding (GO:0005524),Cellular Component:nucleus (GO:0005634),Biological Process:DNA topological change (GO:0006265)
CAFS_HM_T_00054687	--	--
CAFS_HM_T_00053004	--	--
CAFS_HM_T_00064350	2	Molecular Function:oxidoreductase activity (GO:0016491),Biological Process:oxidation-reduction process (GO:0055114)
CAFS_HM_T_00064735	--	--
CAFS_HM_T_00019700	2	Molecular Function:GTP binding (GO:0005525),Biological Process:small GTPase mediated signal transduction (GO:0007264)
CAFS_HM_T_00039346	2	Molecular Function:GTP binding (GO:0005525),Biological Process:small GTPase mediated signal transduction (GO:0007264)
CAFS_HM_T_00006565	3	Molecular Function:protein kinase activity (GO:0004672),Molecular Function:ATP binding (GO:0005524),Biological Process:protein phosphorylation (GO:0006468)
CAFS_HM_T_00014281	2	Molecular Function:catalytic activity (GO:0003824),Biological Process:metabolic process (GO:0008152)
CAFS_HM_T_00001453	1	Biological Process:carbohydrate metabolic process (GO:0005975)
CAFS_HM_T_00063174	5	Molecular Function:metalloendopeptidase activity (GO:0004222),Molecular Function:ATP binding (GO:0005524),Biological Process:proteolysis (GO:0006508),Molecular Function:zinc ion binding (GO:0008270),Cellular Component:integral component of membrane (GO:0016021)
CAFS_HM_T_00077372	1	Biological Process:protein import into nucleus (GO:0006606)
CAFS_HM_T_00087635	2	Biological Process:ubiquitin-dependent protein catabolic process (GO:0006511),Molecular Function:ubiquitin protein ligase binding (GO:0031625)
CAFS_HM_T_00013642	2	Molecular Function:catalytic activity (GO:0003824),Biological Process:metabolic process (GO:0008152)
CAFS_HM_T_00038915	2	Molecular Function:GTP binding (GO:0005525),Biological Process:small GTPase mediated signal transduction (GO:0007264)
CAFS_HM_T_00059277	--	--
CAFS_HM_T_00067327	--	--
CAFS_HM_T_00009938	2	Molecular Function:structural molecule activity (GO:0005198),Cellular Component:intermediate filament (GO:0005882)
CAFS_HM_T_00076345	--	--
CAFS_HM_T_00056409	--	--
CAFS_HM_T_00073419	1	Molecular Function:protein binding (GO:0005515)
CAFS_HM_T_00031771	1	Molecular Function:protein binding (GO:0005515)
CAFS_HM_T_00021376	2	Molecular Function:calcium ion binding (GO:0005509),Molecular Function:calcium-dependent phospholipid binding (GO:0005544)
CAFS_HM_T_00065779	--	--
CAFS_HM_T_00054004	2	Molecular Function:metalloendopeptidase activity (GO:0004222),Biological Process:proteolysis (GO:0006508)
CAFS_HM_T_00025228	3	Molecular Function:protein tyrosine phosphatase activity (GO:0004725),Molecular Function:protein binding (GO:0005515),Biological Process:protein dephosphorylation (GO:0006470)
CAFS_HM_T_00052679	2	Molecular Function:ferrochelatase activity (GO:0004325),Biological Process:heme biosynthetic process (GO:0006783)
CAFS_HM_T_00075635	2	Molecular Function:protein binding (GO:0005515),Biological Process:intracellular protein transport (GO:0006886)
CAFS_HM_T_00029106	--	--
CAFS_HM_T_00074198	5	Molecular Function:GTPase activity (GO:0003924),Molecular Function:signal transducer activity (GO:0004871),Biological Process:G-protein coupled receptor signaling pathway (GO:0007186),Molecular Function:guanyl nucleotide binding (GO:0019001),Molecular Function:G-protein beta/gamma-subunit complex binding (GO:0031683)
CAFS_HM_T_00051558	--	--
CAFS_HM_T_00091897	--	--
CAFS_HM_T_00053842	2	Molecular Function:structural molecule activity (GO:0005198),Cellular Component:intermediate filament (GO:0005882)
CAFS_HM_T_00036812	1	Molecular Function:nucleic acid binding (GO:0003676)
CAFS_HM_T_00062337	--	--
CAFS_HM_T_00042270	--	--
CAFS_HM_T_00017218	--	--
CAFS_HM_T_00062320	--	--
CAFS_HM_T_00015738	--	--
CAFS_HM_T_00007003	2	Molecular Function:oxidoreductase activity (GO:0016491),Biological Process:oxidation-reduction process (GO:0055114)
CAFS_HM_T_00059643	--	--
CAFS_HM_T_00075410	2	Molecular Function:GTP binding (GO:0005525),Biological Process:small GTPase mediated signal transduction (GO:0007264)
CAFS_HM_T_00076349	6	Molecular Function:DNA binding (GO:0003677),Molecular Function:helicase activity (GO:0004386),Molecular Function:ATP binding (GO:0005524),Cellular Component:cytoplasm (GO:0005737),Molecular Function:zinc ion binding (GO:0008270),Molecular Function:hydrolase activity (GO:0016787)
CAFS_HM_T_00069480	--	--
CAFS_HM_T_00034469	5	Molecular Function:endopeptidase activity (GO:0004175),Molecular Function:threonine-type endopeptidase activity (GO:0004298),Cellular Component:proteasome core complex (GO:0005839),Biological Process:ubiquitin-dependent protein catabolic process (GO:0006511),Biological Process:proteolysis involved in cellular protein catabolic process (GO:0051603)
CAFS_HM_T_00011835	2	Biological Process:metabolic process (GO:0008152),Molecular Function:sulfuric ester hydrolase activity (GO:0008484)
CAFS_HM_T_00073950	1	Molecular Function:protein binding (GO:0005515)
CAFS_HM_T_00061152	2	Molecular Function:phosphatidylinositol phosphate kinase activity (GO:0016307),Biological Process:phosphatidylinositol metabolic process (GO:0046488)
CAFS_HM_T_00038065	--	--
CAFS_HM_T_00069009	2	Molecular Function:actin binding (GO:0003779),Molecular Function:phospholipid binding (GO:0005543)
CAFS_HM_T_00091103	1	Biological Process:metabolic process (GO:0008152)
CAFS_HM_T_00019174	--	--
CAFS_HM_T_00069174	--	--
CAFS_HM_T_00006369	--	--
CAFS_HM_T_00026214	2	Molecular Function:catalytic activity (GO:0003824),Biological Process:oxidation-reduction process (GO:0055114)
CAFS_HM_T_00064019	1	Molecular Function:small protein activating enzyme activity (GO:0008641)
CAFS_HM_T_00054305	2	Molecular Function:GTP binding (GO:0005525),Biological Process:small GTPase mediated signal transduction (GO:0007264)
CAFS_HM_T_00064181	2	Biological Process:intracellular protein transport (GO:0006886),Molecular Function:phosphatidylinositol binding (GO:0035091)
CAFS_HM_T_00031689	1	Biological Process:protein import into nucleus (GO:0006606)
CAFS_HM_T_00008491	--	--
CAFS_HM_T_00014560	1	Molecular Function:nucleic acid binding (GO:0003676)
CAFS_HM_T_00072640	1	Molecular Function:tRNA binding (GO:0000049)
CAFS_HM_T_00047022	5	Molecular Function:serine-type endopeptidase activity (GO:0004252),Molecular Function:calcium ion binding (GO:0005509),Cellular Component:extracellular region (GO:0005576),Biological Process:proteolysis (GO:0006508),Biological Process:blood coagulation (GO:0007596)
CAFS_HM_T_00038878	1	Molecular Function:protein binding (GO:0005515)
CAFS_HM_T_00008018	1	Molecular Function:GTP binding (GO:0005525)
CAFS_HM_T_00074163	--	--
CAFS_HM_T_00014129	--	--
CAFS_HM_T_00018725	1	Molecular Function:protein binding (GO:0005515)
CAFS_HM_T_00083431	3	Cellular Component:integral component of membrane (GO:0016021),Molecular Function:transmembrane transporter activity (GO:0022857),Biological Process:transmembrane transport (GO:0055085)
CAFS_HM_T_00074340	2	Biological Process:ubiquitin-dependent protein catabolic process (GO:0006511),Molecular Function:ubiquitin protein ligase binding (GO:0031625)
CAFS_HM_T_00019304	1	Molecular Function:nucleic acid binding (GO:0003676)
CAFS_HM_T_00063425	1	Molecular Function:protein binding (GO:0005515)
CAFS_HM_T_00015784	3	Biological Process:anion transport (GO:0006820),Molecular Function:anion transmembrane transporter activity (GO:0008509),Cellular Component:integral component of membrane (GO:0016021)
CAFS_HM_T_00086973	--	--
CAFS_HM_T_00040188	5	Molecular Function:glycerol-3-phosphate dehydrogenase [NAD+] activity (GO:0004367),Biological Process:carbohydrate metabolic process (GO:0005975),Biological Process:glycerol-3-phosphate catabolic process (GO:0046168),Molecular Function:NAD binding (GO:0051287),Biological Process:oxidation-reduction process (GO:0055114)
CAFS_HM_T_00064723	2	Molecular Function:ATP binding (GO:0005524),Biological Process:carbohydrate metabolic process (GO:0005975)
CAFS_HM_T_00045652	3	Molecular Function:ubiquinol-cytochrome-c reductase activity (GO:0008121),Molecular Function:oxidoreductase activity (GO:0016491),Biological Process:oxidation-reduction process (GO:0055114)
CAFS_HM_T_00042247	--	--
CAFS_HM_T_00055671	2	Molecular Function:GTP binding (GO:0005525),Biological Process:small GTPase mediated signal transduction (GO:0007264)
CAFS_HM_T_00025124	2	Cellular Component:nucleus (GO:0005634),Biological Process:nucleosome assembly (GO:0006334)
CAFS_HM_T_00043559	--	--
CAFS_HM_T_00013675	4	Molecular Function:structural constituent of ribosome (GO:0003735),Cellular Component:intracellular (GO:0005622),Cellular Component:ribosome (GO:0005840),Biological Process:translation (GO:0006412)
CAFS_HM_T_00014240	--	--
CAFS_HM_T_00007163	2	Molecular Function:oxidoreductase activity (GO:0016491),Biological Process:oxidation-reduction process (GO:0055114)
CAFS_HM_T_00053735	4	Molecular Function:ATP binding (GO:0005524),Molecular Function:small protein activating enzyme activity (GO:0008641),Molecular Function:acid-amino acid ligase activity (GO:0016881),Biological Process:protein neddylation (GO:0045116)
CAFS_HM_T_00054643	1	Molecular Function:protein binding (GO:0005515)
CAFS_HM_T_00057141	3	Molecular Function:glutathione synthase activity (GO:0004363),Molecular Function:ATP binding (GO:0005524),Biological Process:glutathione biosynthetic process (GO:0006750)
CAFS_HM_T_00053448	2	Molecular Function:ARF guanyl-nucleotide exchange factor activity (GO:0005086),Biological Process:regulation of ARF protein signal transduction (GO:0032012)
CAFS_HM_T_00067354	--	--
CAFS_HM_T_00077810	1	Molecular Function:protein binding (GO:0005515)
CAFS_HM_T_00036435	3	Molecular Function:ionotropic glutamate receptor activity (GO:0004970),Molecular Function:extracellular-glutamate-gated ion channel activity (GO:0005234),Cellular Component:membrane (GO:0016020)
CAFS_HM_T_00008502	--	--
CAFS_HM_T_00088559	1	Molecular Function:GTPase activator activity (GO:0005096)
CAFS_HM_T_00014913	3	Molecular Function:magnesium ion binding (GO:0000287),Molecular Function:ribose phosphate diphosphokinase activity (GO:0004749),Biological Process:nucleotide biosynthetic process (GO:0009165)
CAFS_HM_T_00019520	1	Molecular Function:GTP binding (GO:0005525)
CAFS_HM_T_00091706	4	Molecular Function:GTP binding (GO:0005525),Biological Process:SRP-dependent cotranslational protein targeting to membrane (GO:0006614),Molecular Function:7S RNA binding (GO:0008312),Cellular Component:signal recognition particle (GO:0048500)
CAFS_HM_T_00062902	--	--
CAFS_HM_T_00040046	2	Biological Process:intracellular protein transport (GO:0006886),Molecular Function:phosphatidylinositol binding (GO:0035091)
CAFS_HM_T_00068955	--	--
CAFS_HM_T_00077471	--	--
CAFS_HM_T_00089946	1	Molecular Function:protein binding (GO:0005515)
CAFS_HM_T_00021595	1	Molecular Function:protein binding (GO:0005515)
CAFS_HM_T_00074967	1	Biological Process:metabolic process (GO:0008152)
CAFS_HM_T_00051624	1	Molecular Function:hydrolase activity (GO:0016787)
CAFS_HM_T_00025434	--	--
CAFS_HM_T_00079714	1	Molecular Function:RNA binding (GO:0003723)
CAFS_HM_T_00086407	1	Cellular Component:integral component of membrane (GO:0016021)
CAFS_HM_T_00075450	6	Molecular Function:RNA binding (GO:0003723),Molecular Function:translation elongation factor activity (GO:0003746),Biological Process:translational frameshifting (GO:0006452),Molecular Function:ribosome binding (GO:0043022),Biological Process:positive regulation of translational elongation (GO:0045901),Biological Process:positive regulation of translational termination (GO:0045905)
CAFS_HM_T_00061160	1	Molecular Function:GTP binding (GO:0005525)
CAFS_HM_T_00054414	--	--
CAFS_HM_T_00070596	--	--
CAFS_HM_T_00081090	2	Molecular Function:oxidoreductase activity (GO:0016491),Biological Process:oxidation-reduction process (GO:0055114)
CAFS_HM_T_00068991	--	--
CAFS_HM_T_00078319	1	Molecular Function:GTP binding (GO:0005525)
CAFS_HM_T_00038614	--	--
CAFS_HM_T_00092375	3	Molecular Function:motor activity (GO:0003774),Molecular Function:ATP binding (GO:0005524),Cellular Component:myosin complex (GO:0016459)
CAFS_HM_T_00034394	2	Molecular Function:GTPase activity (GO:0003924),Molecular Function:GTP binding (GO:0005525)
CAFS_HM_T_00008576	2	Molecular Function:GTP binding (GO:0005525),Biological Process:small GTPase mediated signal transduction (GO:0007264)
CAFS_HM_T_00043659	6	Molecular Function:protein kinase activity (GO:0004672),Molecular Function:protein serine/threonine kinase activity (GO:0004674),Molecular Function:protein binding (GO:0005515),Molecular Function:ATP binding (GO:0005524),Biological Process:protein phosphorylation (GO:0006468),Biological Process:intracellular signal transduction (GO:0035556)
CAFS_HM_T_00005959	2	Cellular Component:F-actin capping protein complex (GO:0008290),Biological Process:barbed-end actin filament capping (GO:0051016)
CAFS_HM_T_00053043	--	--
CAFS_HM_T_00003405	--	--
CAFS_HM_T_00055269	2	Molecular Function:oxidoreductase activity (GO:0016491),Biological Process:oxidation-reduction process (GO:0055114)
CAFS_HM_T_00024561	2	Molecular Function:protein binding (GO:0005515),Cellular Component:membrane (GO:0016020)
CAFS_HM_T_00011756	2	Molecular Function:protein binding (GO:0005515),Molecular Function:zinc ion binding (GO:0008270)
CAFS_HM_T_00041635	4	Biological Process:intracellular protein transport (GO:0006886),Biological Process:ER to Golgi vesicle-mediated transport (GO:0006888),Molecular Function:zinc ion binding (GO:0008270),Cellular Component:COPII vesicle coat (GO:0030127)
CAFS_HM_T_00072430	2	Biological Process:cell adhesion (GO:0007155),Molecular Function:actin filament binding (GO:0051015)
CAFS_HM_T_00017802	--	--
CAFS_HM_T_00059461	6	Molecular Function:RNA binding (GO:0003723),Molecular Function:translation elongation factor activity (GO:0003746),Biological Process:translational frameshifting (GO:0006452),Molecular Function:ribosome binding (GO:0043022),Biological Process:positive regulation of translational elongation (GO:0045901),Biological Process:positive regulation of translational termination (GO:0045905)
CAFS_HM_T_00016084	4	Molecular Function:RNA binding (GO:0003723),Molecular Function:structural constituent of ribosome (GO:0003735),Cellular Component:ribosome (GO:0005840),Biological Process:translation (GO:0006412)
CAFS_HM_T_00091755	1	Molecular Function:protein binding (GO:0005515)
CAFS_HM_T_00078396	3	Biological Process:anion transport (GO:0006820),Molecular Function:anion transmembrane transporter activity (GO:0008509),Cellular Component:integral component of membrane (GO:0016021)
CAFS_HM_T_00078069	--	--
CAFS_HM_T_00028403	3	Molecular Function:protein kinase activity (GO:0004672),Molecular Function:ATP binding (GO:0005524),Biological Process:protein phosphorylation (GO:0006468)
CAFS_HM_T_00029332	--	--
CAFS_HM_T_00053960	1	Molecular Function:nucleic acid binding (GO:0003676)
CAFS_HM_T_00084563	1	Molecular Function:serine-type endopeptidase inhibitor activity (GO:0004867)
CAFS_HM_T_00003386	2	Molecular Function:GTP binding (GO:0005525),Biological Process:small GTPase mediated signal transduction (GO:0007264)
CAFS_HM_T_00056573	--	--
CAFS_HM_T_00029377	2	Molecular Function:ATP binding (GO:0005524),Molecular Function:ATPase activity (GO:0016887)
CAFS_HM_T_00029894	2	Molecular Function:nucleic acid binding (GO:0003676),Molecular Function:protein binding (GO:0005515)
CAFS_HM_T_00004988	3	Molecular Function:protein kinase activity (GO:0004672),Molecular Function:ATP binding (GO:0005524),Biological Process:protein phosphorylation (GO:0006468)
CAFS_HM_T_00005460	5	Molecular Function:GTPase activity (GO:0003924),Molecular Function:signal transducer activity (GO:0004871),Biological Process:G-protein coupled receptor signaling pathway (GO:0007186),Molecular Function:guanyl nucleotide binding (GO:0019001),Molecular Function:G-protein beta/gamma-subunit complex binding (GO:0031683)
CAFS_HM_T_00017306	--	--
CAFS_HM_T_00037941	1	Biological Process:oxidation-reduction process (GO:0055114)
CAFS_HM_T_00084827	1	Molecular Function:glycylpeptide N-tetradecanoyltransferase activity (GO:0004379)
CAFS_HM_T_00067536	--	--
CAFS_HM_T_00066767	1	Biological Process:carbohydrate metabolic process (GO:0005975)
CAFS_HM_T_00015174	--	--
CAFS_HM_T_00020544	2	Biological Process:carbohydrate metabolic process (GO:0005975),Molecular Function:glycogen phosphorylase activity (GO:0008184)
CAFS_HM_T_00004602	--	--
CAFS_HM_T_00039079	1	Molecular Function:protein binding (GO:0005515)
CAFS_HM_T_00002793	2	Molecular Function:nucleic acid binding (GO:0003676),Molecular Function:ATP binding (GO:0005524)
CAFS_HM_T_00017820	1	Molecular Function:GTPase activity (GO:0003924)
CAFS_HM_T_00054850	--	--
CAFS_HM_T_00050307	1	Molecular Function:protein binding (GO:0005515)
CAFS_HM_T_00054722	2	Cellular Component:integral component of membrane (GO:0016021),Biological Process:vesicle-mediated transport (GO:0016192)
CAFS_HM_T_00078090	2	Biological Process:protein methylation (GO:0006479),Molecular Function:methyltransferase activity (GO:0008168)
CAFS_HM_T_00000153	3	Molecular Function:protein binding (GO:0005515),Cellular Component:cytoplasm (GO:0005737),Biological Process:signal transduction (GO:0007165)
CAFS_HM_T_00080561	5	Molecular Function:phosphatidylinositol phospholipase C activity (GO:0004435),Molecular Function:protein binding (GO:0005515),Biological Process:lipid metabolic process (GO:0006629),Biological Process:signal transduction (GO:0007165),Biological Process:intracellular signal transduction (GO:0035556)
CAFS_HM_T_00050108	--	--
CAFS_HM_T_00000557	3	Molecular Function:protein kinase activity (GO:0004672),Molecular Function:ATP binding (GO:0005524),Biological Process:protein phosphorylation (GO:0006468)
CAFS_HM_T_00021322	2	Molecular Function:oxidoreductase activity (GO:0016491),Biological Process:oxidation-reduction process (GO:0055114)
CAFS_HM_T_00088131	--	--
CAFS_HM_T_00021677	2	Molecular Function:calcium ion binding (GO:0005509),Biological Process:cell-matrix adhesion (GO:0007160)
CAFS_HM_T_00012213	1	Molecular Function:ATP binding (GO:0005524)
CAFS_HM_T_00015429	3	Biological Process:metabolic process (GO:0008152),Molecular Function:oxidoreductase activity (GO:0016491),Biological Process:oxidation-reduction process (GO:0055114)
CAFS_HM_T_00043452	1	Molecular Function:protein binding (GO:0005515)
CAFS_HM_T_00060161	1	Biological Process:cell redox homeostasis (GO:0045454)
CAFS_HM_T_00058421	5	Molecular Function:diacylglycerol kinase activity (GO:0004143),Molecular Function:calcium ion binding (GO:0005509),Biological Process:protein kinase C-activating G-protein coupled receptor signaling pathway (GO:0007205),Molecular Function:kinase activity (GO:0016301),Biological Process:intracellular signal transduction (GO:0035556)
CAFS_HM_T_00051670	2	Molecular Function:serine-type endopeptidase activity (GO:0004252),Biological Process:proteolysis (GO:0006508)
CAFS_HM_T_00014504	6	Molecular Function:protein kinase activity (GO:0004672),Molecular Function:protein serine/threonine kinase activity (GO:0004674),Molecular Function:protein binding (GO:0005515),Molecular Function:ATP binding (GO:0005524),Biological Process:protein phosphorylation (GO:0006468),Biological Process:intracellular signal transduction (GO:0035556)
CAFS_HM_T_00009327	--	--
CAFS_HM_T_00081686	3	Molecular Function:carboxy-lyase activity (GO:0016831),Biological Process:carboxylic acid metabolic process (GO:0019752),Molecular Function:pyridoxal phosphate binding (GO:0030170)
CAFS_HM_T_00036966	2	Molecular Function:calcium ion binding (GO:0005509),Molecular Function:calcium-dependent phospholipid binding (GO:0005544)
CAFS_HM_T_00041894	3	Biological Process:metabolic process (GO:0008152),Molecular Function:oxidoreductase activity (GO:0016491),Biological Process:oxidation-reduction process (GO:0055114)
CAFS_HM_T_00073202	--	--
CAFS_HM_T_00026530	3	Cellular Component:sodium:potassium-exchanging ATPase complex (GO:0005890),Biological Process:potassium ion transport (GO:0006813),Biological Process:sodium ion transport (GO:0006814)
CAFS_HM_T_00052195	3	Molecular Function:protein kinase activity (GO:0004672),Molecular Function:ATP binding (GO:0005524),Biological Process:protein phosphorylation (GO:0006468)
CAFS_HM_T_00080203	1	Molecular Function:GTPase activator activity (GO:0005096)
CAFS_HM_T_00008548	2	Molecular Function:GTP binding (GO:0005525),Biological Process:small GTPase mediated signal transduction (GO:0007264)
CAFS_HM_T_00041072	3	Molecular Function:actin binding (GO:0003779),Molecular Function:protein binding (GO:0005515),Cellular Component:intracellular (GO:0005622)
CAFS_HM_T_00057859	2	Molecular Function:ARF guanyl-nucleotide exchange factor activity (GO:0005086),Biological Process:regulation of ARF protein signal transduction (GO:0032012)
CAFS_HM_T_00088066	--	--
CAFS_HM_T_00078787	3	Molecular Function:Rho guanyl-nucleotide exchange factor activity (GO:0005089),Molecular Function:protein binding (GO:0005515),Biological Process:regulation of Rho protein signal transduction (GO:0035023)
CAFS_HM_T_00087477	5	Molecular Function:protein binding (GO:0005515),Cellular Component:nucleus (GO:0005634),Cellular Component:cytoplasm (GO:0005737),Biological Process:protein import into nucleus (GO:0006606),Molecular Function:protein transporter activity (GO:0008565)
CAFS_HM_T_00070546	--	--
CAFS_HM_T_00008623	--	--
CAFS_HM_T_00043899	1	Molecular Function:protein binding (GO:0005515)
CAFS_HM_T_00064882	1	Biological Process:carbohydrate metabolic process (GO:0005975)
CAFS_HM_T_00033864	3	Cellular Component:protein phosphatase type 2A complex (GO:0000159),Biological Process:signal transduction (GO:0007165),Molecular Function:protein phosphatase regulator activity (GO:0019888)
CAFS_HM_T_00014015	2	Molecular Function:extracellular matrix structural constituent (GO:0005201),Molecular Function:protein binding (GO:0005515)
CAFS_HM_T_00051731	3	Molecular Function:adenylosuccinate synthase activity (GO:0004019),Molecular Function:GTP binding (GO:0005525),Biological Process:purine nucleotide biosynthetic process (GO:0006164)
CAFS_HM_T_00081432	--	--
CAFS_HM_T_00008022	4	Molecular Function:acyl-CoA dehydrogenase activity (GO:0003995),Biological Process:metabolic process (GO:0008152),Molecular Function:flavin adenine dinucleotide binding (GO:0050660),Biological Process:oxidation-reduction process (GO:0055114)
CAFS_HM_T_00031650	1	Molecular Function:calcium ion binding (GO:0005509)
CAFS_HM_T_00034176	5	Molecular Function:actin binding (GO:0003779),Molecular Function:structural molecule activity (GO:0005198),Cellular Component:cytoskeleton (GO:0005856),Molecular Function:cytoskeletal protein binding (GO:0008092),Biological Process:cortical actin cytoskeleton organization (GO:0030866)
CAFS_HM_T_00018827	1	Molecular Function:protein binding (GO:0005515)
CAFS_HM_T_00011215	1	Molecular Function:protein binding (GO:0005515)
CAFS_HM_T_00011477	3	Molecular Function:protein kinase activity (GO:0004672),Molecular Function:ATP binding (GO:0005524),Biological Process:protein phosphorylation (GO:0006468)
CAFS_HM_T_00020517	3	Cellular Component:protein phosphatase type 2A complex (GO:0000159),Biological Process:signal transduction (GO:0007165),Molecular Function:protein phosphatase regulator activity (GO:0019888)
CAFS_HM_T_00048033	--	--
CAFS_HM_T_00062201	--	--
CAFS_HM_T_00038417	2	Molecular Function:protein binding (GO:0005515),Cellular Component:cytoplasm (GO:0005737)
CAFS_HM_T_00010215	1	Cellular Component:nuclear pore (GO:0005643)
CAFS_HM_T_00009202	1	Molecular Function:protein binding (GO:0005515)
CAFS_HM_T_00004653	--	--
CAFS_HM_T_00054197	3	Molecular Function:protein kinase activity (GO:0004672),Molecular Function:ATP binding (GO:0005524),Biological Process:protein phosphorylation (GO:0006468)
CAFS_HM_T_00044293	4	Biological Process:proteolysis (GO:0006508),Molecular Function:metallopeptidase activity (GO:0008237),Molecular Function:peptidyl-dipeptidase activity (GO:0008241),Cellular Component:membrane (GO:0016020)
CAFS_HM_T_00065796	1	Molecular Function:nucleic acid binding (GO:0003676)
CAFS_HM_T_00043664	4	Molecular Function:magnesium ion binding (GO:0000287),Molecular Function:catalytic activity (GO:0003824),Molecular Function:phosphoprotein phosphatase activity (GO:0004721),Molecular Function:manganese ion binding (GO:0030145)
CAFS_HM_T_00035889	1	Molecular Function:protein binding (GO:0005515)
CAFS_HM_T_00020070	4	Molecular Function:structural constituent of ribosome (GO:0003735),Molecular Function:protein binding (GO:0005515),Cellular Component:ribosome (GO:0005840),Biological Process:translation (GO:0006412)
CAFS_HM_T_00039199	3	Biological Process:protein peptidyl-prolyl isomerization (GO:0000413),Molecular Function:peptidyl-prolyl cis-trans isomerase activity (GO:0003755),Biological Process:protein folding (GO:0006457)
CAFS_HM_T_00032818	--	--
CAFS_HM_T_00086794	1	Molecular Function:calcium ion binding (GO:0005509)
CAFS_HM_T_00027839	1	Molecular Function:protein binding (GO:0005515)
CAFS_HM_T_00020202	3	Molecular Function:threonine-type endopeptidase activity (GO:0004298),Cellular Component:proteasome core complex (GO:0005839),Biological Process:proteolysis involved in cellular protein catabolic process (GO:0051603)
CAFS_HM_T_00020287	--	--
CAFS_HM_T_00060704	5	Molecular Function:catalytic activity (GO:0003824),Molecular Function:dephospho-CoA kinase activity (GO:0004140),Molecular Function:ATP binding (GO:0005524),Biological Process:biosynthetic process (GO:0009058),Biological Process:coenzyme A biosynthetic process (GO:0015937)
CAFS_HM_T_00075158	3	Cellular Component:sodium:potassium-exchanging ATPase complex (GO:0005890),Biological Process:potassium ion transport (GO:0006813),Biological Process:sodium ion transport (GO:0006814)
CAFS_HM_T_00079342	2	Molecular Function:protein binding (GO:0005515),Biological Process:intracellular protein transport (GO:0006886)
CAFS_HM_T_00021942	2	Molecular Function:glutamate-cysteine ligase activity (GO:0004357),Biological Process:glutathione biosynthetic process (GO:0006750)
CAFS_HM_T_00089762	4	Molecular Function:nucleotide binding (GO:0000166),Molecular Function:aminoacyl-tRNA ligase activity (GO:0004812),Molecular Function:ATP binding (GO:0005524),Biological Process:tRNA aminoacylation for protein translation (GO:0006418)
CAFS_HM_T_00060098	--	--
CAFS_HM_T_00008931	1	Molecular Function:deaminase activity (GO:0019239)
CAFS_HM_T_00031581	--	--
CAFS_HM_T_00074845	2	Molecular Function:zinc ion binding (GO:0008270),Biological Process:catabolic process (GO:0009056)
CAFS_HM_T_00025198	--	--
CAFS_HM_T_00037811	--	--
CAFS_HM_T_00089324	--	--
CAFS_HM_T_00082869	5	Molecular Function:DNA binding (GO:0003677),Molecular Function:protein binding (GO:0005515),Molecular Function:ATP binding (GO:0005524),Cellular Component:nucleus (GO:0005634),Molecular Function:zinc ion binding (GO:0008270)
CAFS_HM_T_00049316	2	Molecular Function:nucleic acid binding (GO:0003676),Molecular Function:ATP binding (GO:0005524)
CAFS_HM_T_00078107	--	--
CAFS_HM_T_00017050	2	Biological Process:biosynthetic process (GO:0009058),Molecular Function:pyridoxal phosphate binding (GO:0030170)
CAFS_HM_T_00073258	1	Cellular Component:integral component of membrane (GO:0016021)
CAFS_HM_T_00075825	3	Molecular Function:protein kinase activity (GO:0004672),Molecular Function:ATP binding (GO:0005524),Biological Process:protein phosphorylation (GO:0006468)
CAFS_HM_T_00070925	--	--
CAFS_HM_T_00057684	--	--
CAFS_HM_T_00077283	2	Molecular Function:RNA binding (GO:0003723),Molecular Function:protein binding (GO:0005515)
CAFS_HM_T_00004769	2	Molecular Function:GTP binding (GO:0005525),Biological Process:small GTPase mediated signal transduction (GO:0007264)
CAFS_HM_T_00034413	4	Molecular Function:N,N-dimethylaniline monooxygenase activity (GO:0004499),Molecular Function:flavin adenine dinucleotide binding (GO:0050660),Molecular Function:NADP binding (GO:0050661),Biological Process:oxidation-reduction process (GO:0055114)
CAFS_HM_T_00015652	2	Molecular Function:GTP binding (GO:0005525),Biological Process:small GTPase mediated signal transduction (GO:0007264)
CAFS_HM_T_00007756	2	Molecular Function:symporter activity (GO:0015293),Cellular Component:integral component of membrane (GO:0016021)
CAFS_HM_T_00091137	--	--
CAFS_HM_T_00009337	3	Molecular Function:magnesium ion binding (GO:0000287),Molecular Function:catalytic activity (GO:0003824),Molecular Function:thiamine pyrophosphate binding (GO:0030976)
CAFS_HM_T_00026419	1	Molecular Function:calcium ion binding (GO:0005509)
CAFS_HM_T_00060239	3	Molecular Function:G-protein coupled receptor activity (GO:0004930),Biological Process:G-protein coupled receptor signaling pathway (GO:0007186),Cellular Component:integral component of membrane (GO:0016021)
CAFS_HM_T_00079062	1	Molecular Function:protein binding (GO:0005515)
CAFS_HM_T_00077413	2	Molecular Function:GTP binding (GO:0005525),Biological Process:small GTPase mediated signal transduction (GO:0007264)
CAFS_HM_T_00046881	--	--
CAFS_HM_T_00081168	1	Molecular Function:protein binding (GO:0005515)
CAFS_HM_T_00016842	2	Molecular Function:protein binding (GO:0005515),Cellular Component:membrane (GO:0016020)
CAFS_HM_T_00076330	2	Molecular Function:protein binding (GO:0005515),Biological Process:intracellular signal transduction (GO:0035556)
CAFS_HM_T_00013221	2	Molecular Function:GTP binding (GO:0005525),Biological Process:small GTPase mediated signal transduction (GO:0007264)
CAFS_HM_T_00039641	2	Cellular Component:integral component of membrane (GO:0016021),Biological Process:vesicle-mediated transport (GO:0016192)
CAFS_HM_T_00043756	3	Molecular Function:actin binding (GO:0003779),Biological Process:cytoskeleton organization (GO:0007010),Molecular Function:zinc ion binding (GO:0008270)
CAFS_HM_T_00029282	1	Molecular Function:phosphoric ester hydrolase activity (GO:0042578)
CAFS_HM_T_00073332	1	Biological Process:carbohydrate metabolic process (GO:0005975)
CAFS_HM_T_00018255	2	Molecular Function:protein tyrosine phosphatase activity (GO:0004725),Biological Process:protein dephosphorylation (GO:0006470)
CAFS_HM_T_00063030	2	Molecular Function:actin binding (GO:0003779),Cellular Component:intracellular (GO:0005622)
CAFS_HM_T_00034397	--	--
CAFS_HM_T_00021922	1	Molecular Function:protein binding (GO:0005515)
CAFS_HM_T_00071989	3	Molecular Function:endopeptidase inhibitor activity (GO:0004866),Cellular Component:extracellular region (GO:0005576),Cellular Component:extracellular space (GO:0005615)
CAFS_HM_T_00042199	--	--
CAFS_HM_T_00013213	--	--
CAFS_HM_T_00055945	2	Molecular Function:ATP binding (GO:0005524),Molecular Function:ATPase activity (GO:0016887)
CAFS_HM_T_00004792	1	Biological Process:regulation of GTPase activity (GO:0043087)
CAFS_HM_T_00024974	2	Molecular Function:protein binding (GO:0005515),Molecular Function:microtubule binding (GO:0008017)
CAFS_HM_T_00009342	1	Molecular Function:GTPase activator activity (GO:0005096)
CAFS_HM_T_00064208	1	Molecular Function:protein binding (GO:0005515)
CAFS_HM_T_00048834	1	Molecular Function:protein binding (GO:0005515)
CAFS_HM_T_00037293	2	Biological Process:ubiquitin-dependent protein catabolic process (GO:0006511),Molecular Function:ubiquitin protein ligase binding (GO:0031625)
CAFS_HM_T_00076677	--	--
CAFS_HM_T_00011356	--	--
CAFS_HM_T_00042870	2	Molecular Function:GTP binding (GO:0005525),Biological Process:small GTPase mediated signal transduction (GO:0007264)
CAFS_HM_T_00031932	--	--
CAFS_HM_T_00053128	--	--
CAFS_HM_T_00022101	1	Biological Process:lipid metabolic process (GO:0006629)
CAFS_HM_T_00033605	1	Molecular Function:protein binding (GO:0005515)
CAFS_HM_T_00083083	1	Biological Process:cell redox homeostasis (GO:0045454)
CAFS_HM_T_00084241	1	Biological Process:isoprenoid biosynthetic process (GO:0008299)
CAFS_HM_T_00068690	--	--
CAFS_HM_T_00010248	--	--
CAFS_HM_T_00045017	1	Molecular Function:protein binding (GO:0005515)
CAFS_HM_T_00044165	1	Molecular Function:protein binding (GO:0005515)
CAFS_HM_T_00005119	3	Molecular Function:thiol-dependent ubiquitin-specific protease activity (GO:0004843),Cellular Component:intracellular (GO:0005622),Biological Process:ubiquitin-dependent protein catabolic process (GO:0006511)
CAFS_HM_T_00069991	1	Molecular Function:RNA binding (GO:0003723)
CAFS_HM_T_00076393	--	--
CAFS_HM_T_00069710	3	Molecular Function:structural constituent of ribosome (GO:0003735),Cellular Component:ribosome (GO:0005840),Biological Process:translation (GO:0006412)
CAFS_HM_T_00075936	3	Molecular Function:threonine-type endopeptidase activity (GO:0004298),Cellular Component:proteasome core complex (GO:0005839),Biological Process:proteolysis involved in cellular protein catabolic process (GO:0051603)
CAFS_HM_T_00029352	1	Molecular Function:protein binding (GO:0005515)
CAFS_HM_T_00064083	--	--
CAFS_HM_T_00089903	5	Molecular Function:endopeptidase activity (GO:0004175),Molecular Function:threonine-type endopeptidase activity (GO:0004298),Cellular Component:proteasome core complex (GO:0005839),Biological Process:ubiquitin-dependent protein catabolic process (GO:0006511),Biological Process:proteolysis involved in cellular protein catabolic process (GO:0051603)
CAFS_HM_T_00070057	2	Biological Process:intracellular protein transport (GO:0006886),Molecular Function:Ran GTPase binding (GO:0008536)
CAFS_HM_T_00075413	--	--
CAFS_HM_T_00058680	--	--
CAFS_HM_T_00015701	2	Molecular Function:GTP binding (GO:0005525),Biological Process:small GTPase mediated signal transduction (GO:0007264)
CAFS_HM_T_00023138	--	--
CAFS_HM_T_00018783	4	Molecular Function:signal recognition particle binding (GO:0005047),Biological Process:SRP-dependent cotranslational protein targeting to membrane (GO:0006614),Molecular Function:7S RNA binding (GO:0008312),Molecular Function:endoplasmic reticulum signal peptide binding (GO:0030942)
CAFS_HM_T_00038325	--	--
CAFS_HM_T_00037146	1	Molecular Function:nucleic acid binding (GO:0003676)
CAFS_HM_T_00024668	2	Molecular Function:oxidoreductase activity (GO:0016491),Biological Process:oxidation-reduction process (GO:0055114)
CAFS_HM_T_00068002	3	Molecular Function:magnesium ion binding (GO:0000287),Molecular Function:ribose phosphate diphosphokinase activity (GO:0004749),Biological Process:nucleotide biosynthetic process (GO:0009165)
CAFS_HM_T_00078983	2	Molecular Function:GTP binding (GO:0005525),Biological Process:small GTPase mediated signal transduction (GO:0007264)
CAFS_HM_T_00060627	2	Molecular Function:GTP binding (GO:0005525),Biological Process:small GTPase mediated signal transduction (GO:0007264)
CAFS_HM_T_00087850	4	Molecular Function:protein kinase activity (GO:0004672),Molecular Function:ATP binding (GO:0005524),Biological Process:protein phosphorylation (GO:0006468),Biological Process:intracellular signal transduction (GO:0035556)
CAFS_HM_T_00028769	2	Molecular Function:nucleic acid binding (GO:0003676),Molecular Function:ATP binding (GO:0005524)
CAFS_HM_T_00045647	--	--
CAFS_HM_T_00088572	2	Molecular Function:cysteine-type endopeptidase activity (GO:0004197),Biological Process:proteolysis (GO:0006508)
CAFS_HM_T_00010672	--	--
CAFS_HM_T_00028762	2	Molecular Function:nucleic acid binding (GO:0003676),Molecular Function:protein binding (GO:0005515)
CAFS_HM_T_00085144	4	Molecular Function:RNA binding (GO:0003723),Biological Process:rRNA processing (GO:0006364),Biological Process:tRNA processing (GO:0008033),Molecular Function:methyltransferase activity (GO:0008168)
CAFS_HM_T_00050973	1	Biological Process:cell redox homeostasis (GO:0045454)
CAFS_HM_T_00022059	3	Cellular Component:protein phosphatase type 2A complex (GO:0000159),Biological Process:signal transduction (GO:0007165),Molecular Function:protein phosphatase regulator activity (GO:0019888)
CAFS_HM_T_00046260	--	--
CAFS_HM_T_00055544	1	Molecular Function:protein binding (GO:0005515)
CAFS_HM_T_00053705	5	Molecular Function:protein kinase activity (GO:0004672),Molecular Function:protein serine/threonine kinase activity (GO:0004674),Molecular Function:ATP binding (GO:0005524),Biological Process:protein phosphorylation (GO:0006468),Biological Process:intracellular signal transduction (GO:0035556)
CAFS_HM_T_00003231	--	--
CAFS_HM_T_00046479	2	Molecular Function:GTPase activator activity (GO:0005096),Biological Process:regulation of small GTPase mediated signal transduction (GO:0051056)
CAFS_HM_T_00017194	3	Cellular Component:sodium:potassium-exchanging ATPase complex (GO:0005890),Biological Process:potassium ion transport (GO:0006813),Biological Process:sodium ion transport (GO:0006814)
CAFS_HM_T_00070194	1	Molecular Function:protein kinase binding (GO:0019901)
CAFS_HM_T_00052904	--	--
CAFS_HM_T_00067068	--	--
CAFS_HM_T_00040341	1	Molecular Function:protein binding (GO:0005515)
CAFS_HM_T_00035477	4	Molecular Function:guanyl-nucleotide exchange factor activity (GO:0005085),Molecular Function:protein binding (GO:0005515),Biological Process:signal transduction (GO:0007165),Biological Process:small GTPase mediated signal transduction (GO:0007264)
CAFS_HM_T_00074258	2	Biological Process:ubiquitin-dependent protein catabolic process (GO:0006511),Molecular Function:ubiquitin protein ligase binding (GO:0031625)
CAFS_HM_T_00081054	4	Molecular Function:structural constituent of ribosome (GO:0003735),Cellular Component:intracellular (GO:0005622),Cellular Component:ribosome (GO:0005840),Biological Process:translation (GO:0006412)
CAFS_HM_T_00046816	3	Molecular Function:nucleic acid binding (GO:0003676),Molecular Function:helicase activity (GO:0004386),Molecular Function:ATP binding (GO:0005524)
CAFS_HM_T_00025041	--	--
CAFS_HM_T_00076551	--	--
CAFS_HM_T_00021828	--	--
CAFS_HM_T_00083053	5	Molecular Function:ATP binding (GO:0005524),Biological Process:transport (GO:0006810),Cellular Component:integral component of membrane (GO:0016021),Molecular Function:ATPase activity (GO:0016887),Biological Process:transmembrane transport (GO:0055085)
CAFS_HM_T_00072452	1	Molecular Function:protein binding (GO:0005515)
CAFS_HM_T_00076602	1	Molecular Function:protein binding (GO:0005515)
CAFS_HM_T_00059201	2	Molecular Function:protein binding (GO:0005515),Molecular Function:microtubule binding (GO:0008017)
CAFS_HM_T_00041607	--	--
CAFS_HM_T_00010233	3	Molecular Function:G-protein coupled receptor activity (GO:0004930),Biological Process:G-protein coupled receptor signaling pathway (GO:0007186),Cellular Component:integral component of membrane (GO:0016021)
CAFS_HM_T_00018595	2	Molecular Function:nucleic acid binding (GO:0003676),Molecular Function:RNA binding (GO:0003723)
CAFS_HM_T_00017188	5	Molecular Function:structural constituent of ribosome (GO:0003735),Cellular Component:intracellular (GO:0005622),Cellular Component:ribosome (GO:0005840),Biological Process:translation (GO:0006412),Molecular Function:5S rRNA binding (GO:0008097)
CAFS_HM_T_00069122	--	--
CAFS_HM_T_00022081	2	Biological Process:biosynthetic process (GO:0009058),Molecular Function:strictosidine synthase activity (GO:0016844)
CAFS_HM_T_00027631	4	Molecular Function:protein kinase activity (GO:0004672),Molecular Function:protein serine/threonine kinase activity (GO:0004674),Molecular Function:ATP binding (GO:0005524),Biological Process:protein phosphorylation (GO:0006468)
CAFS_HM_T_00043326	1	Molecular Function:RNA binding (GO:0003723)
CAFS_HM_T_00086819	--	--
CAFS_HM_T_00013316	--	--
CAFS_HM_T_00065031	1	Molecular Function:protein binding (GO:0005515)
CAFS_HM_T_00066875	--	--
CAFS_HM_T_00049356	1	Biological Process:ubiquitin-dependent protein catabolic process (GO:0006511)
CAFS_HM_T_00016510	2	Molecular Function:electron carrier activity (GO:0009055),Molecular Function:heme binding (GO:0020037)
CAFS_HM_T_00077079	3	Biological Process:metabolic process (GO:0008152),Molecular Function:oxidoreductase activity (GO:0016491),Biological Process:oxidation-reduction process (GO:0055114)
CAFS_HM_T_00057233	2	Molecular Function:protein binding (GO:0005515),Cellular Component:membrane (GO:0016020)
CAFS_HM_T_00090873	2	Molecular Function:GTPase activator activity (GO:0005096),Molecular Function:protein binding (GO:0005515)
CAFS_HM_T_00090706	3	Molecular Function:catalytic activity (GO:0003824),Molecular Function:molybdenum ion binding (GO:0030151),Molecular Function:pyridoxal phosphate binding (GO:0030170)
CAFS_HM_T_00039655	1	Molecular Function:protein binding (GO:0005515)
CAFS_HM_T_00029704	2	Biological Process:vesicle docking involved in exocytosis (GO:0006904),Biological Process:vesicle-mediated transport (GO:0016192)
CAFS_HM_T_00078804	--	--
CAFS_HM_T_00056719	1	Molecular Function:nucleic acid binding (GO:0003676)
CAFS_HM_T_00056710	--	--
CAFS_HM_T_00042996	--	--
CAFS_HM_T_00061439	1	Molecular Function:protein binding (GO:0005515)
CAFS_HM_T_00040906	4	Molecular Function:GTPase activity (GO:0003924),Cellular Component:mitochondrial outer membrane (GO:0005741),Biological Process:mitochondrial fusion (GO:0008053),Cellular Component:integral component of membrane (GO:0016021)
CAFS_HM_T_00087883	3	Molecular Function:protein binding (GO:0005515),Cellular Component:intracellular (GO:0005622),Molecular Function:zinc ion binding (GO:0008270)
CAFS_HM_T_00013220	--	--
CAFS_HM_T_00035316	--	--
CAFS_HM_T_00022719	1	Molecular Function:phosphoric ester hydrolase activity (GO:0042578)
CAFS_HM_T_00072952	1	Molecular Function:protein binding (GO:0005515)
CAFS_HM_T_00086643	3	Molecular Function:protein kinase activity (GO:0004672),Molecular Function:ATP binding (GO:0005524),Biological Process:protein phosphorylation (GO:0006468)
CAFS_HM_T_00024634	1	Molecular Function:lyase activity (GO:0016829)
CAFS_HM_T_00031897	2	Molecular Function:GTPase activator activity (GO:0005096),Biological Process:regulation of small GTPase mediated signal transduction (GO:0051056)
CAFS_HM_T_00027552	--	--
CAFS_HM_T_00002927	2	Molecular Function:RNA binding (GO:0003723),Biological Process:RNA processing (GO:0006396)
CAFS_HM_T_00038858	3	Molecular Function:neurotransmitter:sodium symporter activity (GO:0005328),Biological Process:neurotransmitter transport (GO:0006836),Cellular Component:integral component of membrane (GO:0016021)
CAFS_HM_T_00069582	2	Molecular Function:protein binding (GO:0005515),Molecular Function:zinc ion binding (GO:0008270)
CAFS_HM_T_00062244	5	Molecular Function:GTPase activity (GO:0003924),Molecular Function:signal transducer activity (GO:0004871),Biological Process:G-protein coupled receptor signaling pathway (GO:0007186),Molecular Function:guanyl nucleotide binding (GO:0019001),Molecular Function:G-protein beta/gamma-subunit complex binding (GO:0031683)
CAFS_HM_T_00065773	3	Molecular Function:protein kinase activity (GO:0004672),Molecular Function:ATP binding (GO:0005524),Biological Process:protein phosphorylation (GO:0006468)
CAFS_HM_T_00082416	2	Molecular Function:catalytic activity (GO:0003824),Biological Process:metabolic process (GO:0008152)
CAFS_HM_T_00072546	--	--
CAFS_HM_T_00006993	2	Molecular Function:catalytic activity (GO:0003824),Biological Process:metabolic process (GO:0008152)
CAFS_HM_T_00016532	1	Molecular Function:GTP binding (GO:0005525)
CAFS_HM_T_00086895	--	--
CAFS_HM_T_00051798	--	--
CAFS_HM_T_00006780	--	--
CAFS_HM_T_00019701	1	Molecular Function:catalytic activity (GO:0003824)
CAFS_HM_T_00082604	1	Molecular Function:protein binding (GO:0005515)
CAFS_HM_T_00017856	--	--
CAFS_HM_T_00065097	--	--
CAFS_HM_T_00082978	2	Molecular Function:structural molecule activity (GO:0005198),Cellular Component:intermediate filament (GO:0005882)
CAFS_HM_T_00070898	--	--
CAFS_HM_T_00037449	2	Molecular Function:catalytic activity (GO:0003824),Biological Process:metabolic process (GO:0008152)
CAFS_HM_T_00081213	--	--
CAFS_HM_T_00014122	1	Molecular Function:protein binding (GO:0005515)
CAFS_HM_T_00010878	--	--
CAFS_HM_T_00070681	2	Molecular Function:catalytic activity (GO:0003824),Biological Process:metabolic process (GO:0008152)
CAFS_HM_T_00052893	1	Molecular Function:protein binding (GO:0005515)
CAFS_HM_T_00071736	--	--
CAFS_HM_T_00074430	--	--
CAFS_HM_T_00020870	--	--
CAFS_HM_T_00067604	1	Molecular Function:transcription corepressor activity (GO:0003714)
CAFS_HM_T_00005587	1	Molecular Function:nucleic acid binding (GO:0003676)
CAFS_HM_T_00047679	4	Molecular Function:diacylglycerol kinase activity (GO:0004143),Biological Process:protein kinase C-activating G-protein coupled receptor signaling pathway (GO:0007205),Molecular Function:kinase activity (GO:0016301),Biological Process:intracellular signal transduction (GO:0035556)
CAFS_HM_T_00052797	--	--
CAFS_HM_T_00006180	--	--
CAFS_HM_T_00052461	--	--
CAFS_HM_T_00089922	--	--
CAFS_HM_T_00026788	--	--
CAFS_HM_T_00048037	1	Molecular Function:small protein activating enzyme activity (GO:0008641)
CAFS_HM_T_00031202	2	Molecular Function:nucleic acid binding (GO:0003676),Molecular Function:exonuclease activity (GO:0004527)
CAFS_HM_T_00068798	3	Molecular Function:porphobilinogen synthase activity (GO:0004655),Biological Process:tetrapyrrole biosynthetic process (GO:0033014),Molecular Function:metal ion binding (GO:0046872)
CAFS_HM_T_00089422	3	Molecular Function:G-protein coupled receptor activity (GO:0004930),Biological Process:G-protein coupled receptor signaling pathway (GO:0007186),Cellular Component:integral component of membrane (GO:0016021)
CAFS_HM_T_00078874	--	--
CAFS_HM_T_00004032	2	Molecular Function:methionine adenosyltransferase activity (GO:0004478),Biological Process:S-adenosylmethionine biosynthetic process (GO:0006556)
CAFS_HM_T_00006377	--	--
CAFS_HM_T_00031362	3	Molecular Function:protein kinase activity (GO:0004672),Molecular Function:ATP binding (GO:0005524),Biological Process:protein phosphorylation (GO:0006468)
CAFS_HM_T_00045376	2	Molecular Function:catalytic activity (GO:0003824),Biological Process:oxidation-reduction process (GO:0055114)
CAFS_HM_T_00081039	--	--
CAFS_HM_T_00021889	--	--
CAFS_HM_T_00029544	--	--
CAFS_HM_T_00015642	1	Molecular Function:protein binding (GO:0005515)
CAFS_HM_T_00029706	3	Molecular Function:threonine-type endopeptidase activity (GO:0004298),Cellular Component:proteasome core complex (GO:0005839),Biological Process:proteolysis involved in cellular protein catabolic process (GO:0051603)
CAFS_HM_T_00086286	--	--
CAFS_HM_T_00034552	--	--
CAFS_HM_T_00067454	--	--
CAFS_HM_T_00089584	3	Molecular Function:protein kinase activity (GO:0004672),Molecular Function:ATP binding (GO:0005524),Biological Process:protein phosphorylation (GO:0006468)
CAFS_HM_T_00077329	--	--
CAFS_HM_T_00070365	--	--
CAFS_HM_T_00086662	--	--
CAFS_HM_T_00038873	5	Molecular Function:GTPase activity (GO:0003924),Molecular Function:signal transducer activity (GO:0004871),Biological Process:G-protein coupled receptor signaling pathway (GO:0007186),Molecular Function:guanyl nucleotide binding (GO:0019001),Molecular Function:G-protein beta/gamma-subunit complex binding (GO:0031683)
CAFS_HM_T_00050545	--	--
CAFS_HM_T_00044201	2	Molecular Function:GTP binding (GO:0005525),Biological Process:small GTPase mediated signal transduction (GO:0007264)
CAFS_HM_T_00067660	2	Molecular Function:DNA helicase activity (GO:0003678),Molecular Function:ATP binding (GO:0005524)
CAFS_HM_T_00061238	1	Cellular Component:proteasome activator complex (GO:0008537)
CAFS_HM_T_00024850	5	Molecular Function:serine-type endopeptidase activity (GO:0004252),Molecular Function:scavenger receptor activity (GO:0005044),Molecular Function:protein binding (GO:0005515),Biological Process:proteolysis (GO:0006508),Cellular Component:membrane (GO:0016020)
CAFS_HM_T_00005949	2	Molecular Function:electron carrier activity (GO:0009055),Molecular Function:iron-sulfur cluster binding (GO:0051536)
CAFS_HM_T_00069169	2	Molecular Function:methionine adenosyltransferase activity (GO:0004478),Biological Process:S-adenosylmethionine biosynthetic process (GO:0006556)
CAFS_HM_T_00040116	--	--
CAFS_HM_T_00056147	3	Molecular Function:GTPase activator activity (GO:0005096),Molecular Function:GTP binding (GO:0005525),Biological Process:small GTPase mediated signal transduction (GO:0007264)
CAFS_HM_T_00005623	2	Molecular Function:phosphatidylinositol phosphate kinase activity (GO:0016307),Biological Process:phosphatidylinositol metabolic process (GO:0046488)
CAFS_HM_T_00074004	3	Molecular Function:inositol-3-phosphate synthase activity (GO:0004512),Biological Process:inositol biosynthetic process (GO:0006021),Biological Process:phospholipid biosynthetic process (GO:0008654)
CAFS_HM_T_00041167	2	Biological Process:proteolysis (GO:0006508),Molecular Function:serine-type peptidase activity (GO:0008236)
CAFS_HM_T_00029710	2	Biological Process:proteolysis (GO:0006508),Molecular Function:cysteine-type peptidase activity (GO:0008234)
CAFS_HM_T_00019133	--	--
CAFS_HM_T_00027075	1	Cellular Component:outer membrane (GO:0019867)
CAFS_HM_T_00025954	5	Molecular Function:microtubule motor activity (GO:0003777),Molecular Function:protein binding (GO:0005515),Molecular Function:ATP binding (GO:0005524),Biological Process:microtubule-based movement (GO:0007018),Molecular Function:microtubule binding (GO:0008017)
CAFS_HM_T_00076386	1	Molecular Function:calcium ion binding (GO:0005509)
CAFS_HM_T_00048864	1	Molecular Function:calcium ion binding (GO:0005509)
CAFS_HM_T_00069954	1	Molecular Function:protein binding (GO:0005515)
CAFS_HM_T_00081922	1	Molecular Function:calcium ion binding (GO:0005509)
CAFS_HM_T_00031125	--	--
CAFS_HM_T_00072746	4	Molecular Function:damaged DNA binding (GO:0003684),Molecular Function:protein binding (GO:0005515),Biological Process:nucleotide-excision repair (GO:0006289),Biological Process:proteasome-mediated ubiquitin-dependent protein catabolic process (GO:0043161)
CAFS_HM_T_00058123	7	Cellular Component:voltage-gated sodium channel complex (GO:0001518),Molecular Function:ion channel activity (GO:0005216),Molecular Function:voltage-gated sodium channel activity (GO:0005248),Biological Process:ion transport (GO:0006811),Biological Process:sodium ion transport (GO:0006814),Cellular Component:membrane (GO:0016020),Biological Process:transmembrane transport (GO:0055085)
CAFS_HM_T_00013126	2	Molecular Function:oxidoreductase activity (GO:0016491),Biological Process:oxidation-reduction process (GO:0055114)
CAFS_HM_T_00063933	--	--
CAFS_HM_T_00069422	2	Cellular Component:intracellular (GO:0005622),Biological Process:ribosome biogenesis (GO:0042254)
CAFS_HM_T_00017129	2	Molecular Function:GTP binding (GO:0005525),Biological Process:small GTPase mediated signal transduction (GO:0007264)
CAFS_HM_T_00068116	1	Molecular Function:protein binding (GO:0005515)
CAFS_HM_T_00012761	2	Cellular Component:intracellular (GO:0005622),Biological Process:intracellular protein transport (GO:0006886)
CAFS_HM_T_00079783	3	Molecular Function:protein kinase activity (GO:0004672),Molecular Function:ATP binding (GO:0005524),Biological Process:protein phosphorylation (GO:0006468)
CAFS_HM_T_00028088	4	Molecular Function:serine-type endopeptidase activity (GO:0004252),Biological Process:proteolysis (GO:0006508),Molecular Function:serine-type peptidase activity (GO:0008236),Molecular Function:serine-type exopeptidase activity (GO:0070008)
CAFS_HM_T_00021849	4	Molecular Function:3'-5'-exoribonuclease activity (GO:0000175),Molecular Function:nucleic acid binding (GO:0003676),Molecular Function:RNA binding (GO:0003723),Biological Process:RNA processing (GO:0006396)
CAFS_HM_T_00006426	--	--
CAFS_HM_T_00020983	2	Biological Process:cell adhesion (GO:0007155),Molecular Function:actin filament binding (GO:0051015)
CAFS_HM_T_00082643	1	Molecular Function:selenium binding (GO:0008430)
CAFS_HM_T_00074774	1	Molecular Function:protein binding (GO:0005515)
CAFS_HM_T_00075464	2	Biological Process:regulation of cell shape (GO:0008360),Cellular Component:membrane (GO:0016020)
CAFS_HM_T_00013993	1	Molecular Function:protein binding (GO:0005515)
CAFS_HM_T_00033379	5	Molecular Function:protein kinase activity (GO:0004672),Molecular Function:protein serine/threonine kinase activity (GO:0004674),Molecular Function:ATP binding (GO:0005524),Biological Process:protein phosphorylation (GO:0006468),Biological Process:intracellular signal transduction (GO:0035556)
CAFS_HM_T_00071518	--	--
CAFS_HM_T_00021073	2	Molecular Function:ATP binding (GO:0005524),Biological Process:carbohydrate metabolic process (GO:0005975)
CAFS_HM_T_00077970	1	Molecular Function:nucleic acid binding (GO:0003676)
CAFS_HM_T_00042826	1	Molecular Function:protein binding (GO:0005515)
CAFS_HM_T_00060399	--	--
CAFS_HM_T_00066340	3	Molecular Function:endopeptidase inhibitor activity (GO:0004866),Cellular Component:extracellular region (GO:0005576),Cellular Component:extracellular space (GO:0005615)
CAFS_HM_T_00064443	1	Molecular Function:catalytic activity (GO:0003824)
CAFS_HM_T_00086220	--	--
CAFS_HM_T_00085056	4	Molecular Function:RNA binding (GO:0003723),Molecular Function:double-stranded RNA adenosine deaminase activity (GO:0003726),Molecular Function:adenosine deaminase activity (GO:0004000),Biological Process:RNA processing (GO:0006396)
CAFS_HM_T_00034902	--	--
CAFS_HM_T_00013037	3	Molecular Function:iron ion binding (GO:0005506),Molecular Function:heme binding (GO:0020037),Biological Process:oxidation-reduction process (GO:0055114)
CAFS_HM_T_00074041	3	Molecular Function:protein kinase activity (GO:0004672),Molecular Function:ATP binding (GO:0005524),Biological Process:protein phosphorylation (GO:0006468)
CAFS_HM_T_00021256	3	Molecular Function:translation initiation factor activity (GO:0003743),Cellular Component:cytoplasm (GO:0005737),Cellular Component:eukaryotic translation initiation factor 3 complex (GO:0005852)
CAFS_HM_T_00081370	2	Molecular Function:protein tyrosine phosphatase activity (GO:0004725),Biological Process:protein dephosphorylation (GO:0006470)
CAFS_HM_T_00069043	4	Molecular Function:protein kinase activity (GO:0004672),Molecular Function:protein serine/threonine kinase activity (GO:0004674),Molecular Function:ATP binding (GO:0005524),Biological Process:protein phosphorylation (GO:0006468)
CAFS_HM_T_00011977	--	--
CAFS_HM_T_00015406	2	Molecular Function:hormone activity (GO:0005179),Cellular Component:extracellular region (GO:0005576)
CAFS_HM_T_00069933	3	Molecular Function:protein kinase activity (GO:0004672),Molecular Function:ATP binding (GO:0005524),Biological Process:protein phosphorylation (GO:0006468)
CAFS_HM_T_00036633	--	--
CAFS_HM_T_00090680	1	Molecular Function:FAD binding (GO:0071949)
CAFS_HM_T_00076272	2	Molecular Function:catalytic activity (GO:0003824),Biological Process:nucleoside metabolic process (GO:0009116)
CAFS_HM_T_00001890	2	Molecular Function:scavenger receptor activity (GO:0005044),Cellular Component:membrane (GO:0016020)
CAFS_HM_T_00074092	2	Molecular Function:phosphatidylinositol phosphate kinase activity (GO:0016307),Biological Process:phosphatidylinositol metabolic process (GO:0046488)
CAFS_HM_T_00077719	1	Molecular Function:protein binding (GO:0005515)
CAFS_HM_T_00042766	4	Molecular Function:translation initiation factor activity (GO:0003743),Cellular Component:eukaryotic translation initiation factor 3 complex (GO:0005852),Biological Process:translational initiation (GO:0006413),Molecular Function:translation initiation factor binding (GO:0031369)
CAFS_HM_T_00019817	1	Molecular Function:protein binding (GO:0005515)
CAFS_HM_T_00059230	3	Molecular Function:GTPase activator activity (GO:0005096),Molecular Function:GTP binding (GO:0005525),Biological Process:small GTPase mediated signal transduction (GO:0007264)
CAFS_HM_T_00014693	1	Biological Process:carbohydrate metabolic process (GO:0005975)
CAFS_HM_T_00088487	4	Molecular Function:motor activity (GO:0003774),Molecular Function:protein binding (GO:0005515),Molecular Function:ATP binding (GO:0005524),Cellular Component:myosin complex (GO:0016459)
CAFS_HM_T_00069383	1	Molecular Function:RNA binding (GO:0003723)
CAFS_HM_T_00003351	2	Molecular Function:protein tyrosine phosphatase activity (GO:0004725),Biological Process:protein dephosphorylation (GO:0006470)
CAFS_HM_T_00072728	--	--
CAFS_HM_T_00013890	2	Cellular Component:intracellular (GO:0005622),Biological Process:transport (GO:0006810)
CAFS_HM_T_00045002	--	--
CAFS_HM_T_00015034	1	Molecular Function:protein binding (GO:0005515)
CAFS_HM_T_00006315	4	Molecular Function:microtubule motor activity (GO:0003777),Molecular Function:ATP binding (GO:0005524),Biological Process:microtubule-based movement (GO:0007018),Molecular Function:microtubule binding (GO:0008017)
CAFS_HM_T_00075045	1	Molecular Function:ATP binding (GO:0005524)
CAFS_HM_T_00005390	--	--
CAFS_HM_T_00008159	--	--
CAFS_HM_T_00088207	1	Molecular Function:phospholipid binding (GO:0005543)
CAFS_HM_T_00090865	3	Molecular Function:nucleic acid binding (GO:0003676),Molecular Function:RNA binding (GO:0003723),Molecular Function:translation initiation factor activity (GO:0003743)
CAFS_HM_T_00012732	5	Molecular Function:tRNA binding (GO:0000049),Molecular Function:aminoacyl-tRNA ligase activity (GO:0004812),Molecular Function:ATP binding (GO:0005524),Cellular Component:cytoplasm (GO:0005737),Biological Process:tRNA aminoacylation (GO:0043039)
CAFS_HM_T_00044859	--	--
CAFS_HM_T_00085736	1	Molecular Function:GTP binding (GO:0005525)
CAFS_HM_T_00064369	1	Molecular Function:DNA binding (GO:0003677)
CAFS_HM_T_00003972	2	Molecular Function:calcium ion binding (GO:0005509),Molecular Function:calcium-dependent phospholipid binding (GO:0005544)
CAFS_HM_T_00087278	1	Molecular Function:protein binding (GO:0005515)
CAFS_HM_T_00003225	4	Biological Process:protein peptidyl-prolyl isomerization (GO:0000413),Molecular Function:peptidyl-prolyl cis-trans isomerase activity (GO:0003755),Biological Process:protein folding (GO:0006457),Molecular Function:zinc ion binding (GO:0008270)
CAFS_HM_T_00071323	3	Molecular Function:protein binding (GO:0005515),Cellular Component:intracellular (GO:0005622),Molecular Function:zinc ion binding (GO:0008270)
CAFS_HM_T_00013853	2	Molecular Function:protein binding (GO:0005515),Molecular Function:zinc ion binding (GO:0008270)
CAFS_HM_T_00087625	3	Molecular Function:copper ion binding (GO:0005507),Molecular Function:oxidoreductase activity (GO:0016491),Biological Process:oxidation-reduction process (GO:0055114)
CAFS_HM_T_00030513	1	Molecular Function:nucleic acid binding (GO:0003676)
CAFS_HM_T_00071024	3	Cellular Component:cytoplasm (GO:0005737),Molecular Function:cytoskeletal protein binding (GO:0008092),Cellular Component:extrinsic component of membrane (GO:0019898)
CAFS_HM_T_00032493	5	Molecular Function:endopeptidase activity (GO:0004175),Molecular Function:threonine-type endopeptidase activity (GO:0004298),Cellular Component:proteasome core complex (GO:0005839),Biological Process:ubiquitin-dependent protein catabolic process (GO:0006511),Biological Process:proteolysis involved in cellular protein catabolic process (GO:0051603)
CAFS_HM_T_00041756	1	Molecular Function:ATP binding (GO:0005524)
CAFS_HM_T_00048314	6	Molecular Function:RNA binding (GO:0003723),Molecular Function:translation elongation factor activity (GO:0003746),Biological Process:translational frameshifting (GO:0006452),Molecular Function:ribosome binding (GO:0043022),Biological Process:positive regulation of translational elongation (GO:0045901),Biological Process:positive regulation of translational termination (GO:0045905)
CAFS_HM_T_00029546	5	Molecular Function:endopeptidase activity (GO:0004175),Molecular Function:threonine-type endopeptidase activity (GO:0004298),Cellular Component:proteasome core complex (GO:0005839),Biological Process:ubiquitin-dependent protein catabolic process (GO:0006511),Biological Process:proteolysis involved in cellular protein catabolic process (GO:0051603)
CAFS_HM_T_00034512	1	Biological Process:phosphatidylinositol phosphorylation (GO:0046854)
CAFS_HM_T_00069566	3	Molecular Function:iron ion binding (GO:0005506),Molecular Function:heme binding (GO:0020037),Biological Process:oxidation-reduction process (GO:0055114)
CAFS_HM_T_00081450	3	Molecular Function:protein kinase activity (GO:0004672),Molecular Function:ATP binding (GO:0005524),Biological Process:protein phosphorylation (GO:0006468)
CAFS_HM_T_00048762	2	Molecular Function:protein binding (GO:0005515),Biological Process:regulation of apoptotic process (GO:0042981)
CAFS_HM_T_00028649	--	--
CAFS_HM_T_00011558	2	Cellular Component:nuclear pore (GO:0005643),Biological Process:transport (GO:0006810)
CAFS_HM_T_00028194	--	--
CAFS_HM_T_00089433	--	--
CAFS_HM_T_00080628	3	Molecular Function:thiol-dependent ubiquitin-specific protease activity (GO:0004843),Cellular Component:intracellular (GO:0005622),Biological Process:ubiquitin-dependent protein catabolic process (GO:0006511)
CAFS_HM_T_00043726	--	--
CAFS_HM_T_00028746	2	Biological Process:endocytosis (GO:0006897),Cellular Component:membrane (GO:0016020)
CAFS_HM_T_00092242	3	Cellular Component:cytoplasm (GO:0005737),Biological Process:exocytosis (GO:0006887),Biological Process:vesicle docking (GO:0048278)
CAFS_HM_T_00065937	2	Molecular Function:DNA binding (GO:0003677),Molecular Function:transcription coactivator activity (GO:0003713)
CAFS_HM_T_00071846	4	Molecular Function:magnesium ion binding (GO:0000287),Molecular Function:inorganic diphosphatase activity (GO:0004427),Cellular Component:cytoplasm (GO:0005737),Biological Process:phosphate-containing compound metabolic process (GO:0006796)
CAFS_HM_T_00090136	3	Molecular Function:ubiquitin-protein transferase activity (GO:0004842),Biological Process:apoptotic process (GO:0006915),Biological Process:regulation of cytokinesis (GO:0032465)
CAFS_HM_T_00052588	1	Molecular Function:nucleic acid binding (GO:0003676)
CAFS_HM_T_00018630	3	Molecular Function:protein tyrosine phosphatase activity (GO:0004725),Molecular Function:protein binding (GO:0005515),Biological Process:protein dephosphorylation (GO:0006470)
CAFS_HM_T_00069463	1	Cellular Component:mitochondrial matrix (GO:0005759)
CAFS_HM_T_00047573	3	Molecular Function:protein kinase activity (GO:0004672),Molecular Function:ATP binding (GO:0005524),Biological Process:protein phosphorylation (GO:0006468)
CAFS_HM_T_00029226	1	Molecular Function:protein binding (GO:0005515)
CAFS_HM_T_00014881	1	Molecular Function:nucleic acid binding (GO:0003676)
CAFS_HM_T_00067641	3	Molecular Function:protein kinase activity (GO:0004672),Molecular Function:ATP binding (GO:0005524),Biological Process:protein phosphorylation (GO:0006468)
CAFS_HM_T_00029724	--	--
CAFS_HM_T_00092009	2	Molecular Function:lipid transporter activity (GO:0005319),Biological Process:lipid transport (GO:0006869)
CAFS_HM_T_00083214	1	Molecular Function:arylesterase activity (GO:0004064)
CAFS_HM_T_00031451	--	--
CAFS_HM_T_00021427	1	Molecular Function:O-methyltransferase activity (GO:0008171)
CAFS_HM_T_00070380	5	Molecular Function:protein binding (GO:0005515),Cellular Component:nucleus (GO:0005634),Cellular Component:cytoplasm (GO:0005737),Biological Process:protein import into nucleus (GO:0006606),Molecular Function:protein transporter activity (GO:0008565)
CAFS_HM_T_00018345	2	Cellular Component:mitochondrial outer membrane (GO:0005741),Biological Process:protein targeting to mitochondrion (GO:0006626)
CAFS_HM_T_00078343	--	--
CAFS_HM_T_00062519	4	Molecular Function:catalytic activity (GO:0003824),Molecular Function:oxidoreductase activity (GO:0016491),Molecular Function:flavin adenine dinucleotide binding (GO:0050660),Biological Process:oxidation-reduction process (GO:0055114)
CAFS_HM_T_00013096	1	Molecular Function:GTP binding (GO:0005525)
CAFS_HM_T_00040009	2	Cellular Component:intracellular (GO:0005622),Molecular Function:zinc ion binding (GO:0008270)
CAFS_HM_T_00008950	3	Molecular Function:protein kinase activity (GO:0004672),Molecular Function:ATP binding (GO:0005524),Biological Process:protein phosphorylation (GO:0006468)
CAFS_HM_T_00072456	--	--
CAFS_HM_T_00015612	1	Molecular Function:hydrolase activity (GO:0016787)
CAFS_HM_T_00026393	1	Molecular Function:protein binding (GO:0005515)
CAFS_HM_T_00085036	4	Cellular Component:extracellular region (GO:0005576),Biological Process:lipid transport (GO:0006869),Molecular Function:lipid binding (GO:0008289),Biological Process:lipoprotein metabolic process (GO:0042157)
CAFS_HM_T_00023390	--	--
CAFS_HM_T_00008643	3	Cellular Component:proteinaceous extracellular matrix (GO:0005578),Cellular Component:membrane (GO:0016020),Molecular Function:heparan sulfate proteoglycan binding (GO:0043395)
CAFS_HM_T_00086319	4	Molecular Function:nucleotide binding (GO:0000166),Molecular Function:aminoacyl-tRNA ligase activity (GO:0004812),Molecular Function:ATP binding (GO:0005524),Biological Process:tRNA aminoacylation for protein translation (GO:0006418)
CAFS_HM_T_00031942	--	--
CAFS_HM_T_00035439	4	Biological Process:ion transport (GO:0006811),Molecular Function:ion transmembrane transporter activity (GO:0015075),Cellular Component:membrane (GO:0016020),Biological Process:transmembrane transport (GO:0055085)
CAFS_HM_T_00011872	2	Molecular Function:heat shock protein binding (GO:0031072),Molecular Function:unfolded protein binding (GO:0051082)
CAFS_HM_T_00051499	2	Cellular Component:nuclear pore (GO:0005643),Biological Process:transport (GO:0006810)
CAFS_HM_T_00031462	--	--
CAFS_HM_T_00011273	4	Molecular Function:guanyl-nucleotide exchange factor activity (GO:0005085),Molecular Function:Rho guanyl-nucleotide exchange factor activity (GO:0005089),Biological Process:small GTPase mediated signal transduction (GO:0007264),Biological Process:regulation of Rho protein signal transduction (GO:0035023)
CAFS_HM_T_00059823	2	Biological Process:ubiquitin-dependent protein catabolic process (GO:0006511),Molecular Function:ubiquitin protein ligase binding (GO:0031625)
CAFS_HM_T_00005153	2	Biological Process:protein transport (GO:0015031),Cellular Component:integral component of endoplasmic reticulum membrane (GO:0030176)
CAFS_HM_T_00070529	2	Biological Process:metabolic process (GO:0008152),Molecular Function:uridylyltransferase activity (GO:0070569)
CAFS_HM_T_00089666	3	Molecular Function:protein kinase activity (GO:0004672),Molecular Function:protein binding (GO:0005515),Biological Process:protein phosphorylation (GO:0006468)
CAFS_HM_T_00016065	2	Biological Process:intracellular protein transport (GO:0006886),Molecular Function:Ran GTPase binding (GO:0008536)
CAFS_HM_T_00036310	2	Molecular Function:protein binding (GO:0005515),Molecular Function:zinc ion binding (GO:0008270)
CAFS_HM_T_00016265	3	Molecular Function:threonine-type endopeptidase activity (GO:0004298),Cellular Component:proteasome core complex (GO:0005839),Biological Process:proteolysis involved in cellular protein catabolic process (GO:0051603)
CAFS_HM_T_00063982	3	Cellular Component:integral component of membrane (GO:0016021),Molecular Function:transmembrane transporter activity (GO:0022857),Biological Process:transmembrane transport (GO:0055085)
CAFS_HM_T_00011060	--	--
CAFS_HM_T_00043021	8	Molecular Function:ion channel activity (GO:0005216),Molecular Function:ryanodine-sensitive calcium-release channel activity (GO:0005219),Molecular Function:calcium ion binding (GO:0005509),Biological Process:ion transport (GO:0006811),Biological Process:cellular calcium ion homeostasis (GO:0006874),Cellular Component:membrane (GO:0016020),Cellular Component:integral component of membrane (GO:001…
CAFS_HM_T_00036307	--	--
CAFS_HM_T_00035816	3	Molecular Function:ionotropic glutamate receptor activity (GO:0004970),Molecular Function:extracellular-glutamate-gated ion channel activity (GO:0005234),Cellular Component:membrane (GO:0016020)
CAFS_HM_T_00027003	1	Cellular Component:integral component of membrane (GO:0016021)
CAFS_HM_T_00059764	4	Molecular Function:protein kinase activity (GO:0004672),Molecular Function:protein serine/threonine kinase activity (GO:0004674),Molecular Function:ATP binding (GO:0005524),Biological Process:protein phosphorylation (GO:0006468)
CAFS_HM_T_00022327	2	Molecular Function:actin binding (GO:0003779),Cellular Component:intracellular (GO:0005622)
CAFS_HM_T_00077423	--	--
CAFS_HM_T_00035121	4	Molecular Function:protein binding (GO:0005515),Biological Process:SRP-dependent cotranslational protein targeting to membrane (GO:0006614),Molecular Function:7S RNA binding (GO:0008312),Cellular Component:signal recognition particle (GO:0048500)
CAFS_HM_T_00010738	--	--
CAFS_HM_T_00003950	1	Molecular Function:adenylate kinase activity (GO:0004017)
CAFS_HM_T_00013525	--	--
CAFS_HM_T_00003310	2	Cellular Component:integral component of membrane (GO:0016021),Biological Process:vesicle-mediated transport (GO:0016192)
CAFS_HM_T_00011183	8	Molecular Function:ryanodine-sensitive calcium-release channel activity (GO:0005219),Molecular Function:calcium channel activity (GO:0005262),Molecular Function:calcium ion binding (GO:0005509),Molecular Function:protein binding (GO:0005515),Biological Process:cellular calcium ion homeostasis (GO:0006874),Cellular Component:membrane (GO:0016020),Cellular Component:integral component of membrane (…
CAFS_HM_T_00058058	--	--
CAFS_HM_T_00053411	2	Molecular Function:RNA binding (GO:0003723),Molecular Function:protein binding (GO:0005515)
CAFS_HM_T_00081668	--	--
CAFS_HM_T_00053918	2	Biological Process:regulation of cell shape (GO:0008360),Cellular Component:membrane (GO:0016020)
CAFS_HM_T_00021130	3	Molecular Function:serine-type endopeptidase activity (GO:0004252),Molecular Function:protein binding (GO:0005515),Biological Process:proteolysis (GO:0006508)
CAFS_HM_T_00049569	--	--
CAFS_HM_T_00075629	3	Molecular Function:protein kinase activity (GO:0004672),Molecular Function:protein binding (GO:0005515),Biological Process:protein phosphorylation (GO:0006468)
CAFS_HM_T_00026363	--	--
CAFS_HM_T_00038258	1	Molecular Function:zinc ion binding (GO:0008270)
CAFS_HM_T_00040362	4	Molecular Function:Rho guanyl-nucleotide exchange factor activity (GO:0005089),Molecular Function:protein binding (GO:0005515),Biological Process:signal transduction (GO:0007165),Biological Process:regulation of Rho protein signal transduction (GO:0035023)
CAFS_HM_T_00055728	1	Molecular Function:nucleic acid binding (GO:0003676)
CAFS_HM_T_00031758	3	Molecular Function:G-protein coupled receptor activity (GO:0004930),Biological Process:G-protein coupled receptor signaling pathway (GO:0007186),Cellular Component:integral component of membrane (GO:0016021)
CAFS_HM_T_00088581	1	Molecular Function:protein binding (GO:0005515)
CAFS_HM_T_00062831	1	Molecular Function:protein binding (GO:0005515)
CAFS_HM_T_00081075	4	Molecular Function:protein kinase activity (GO:0004672),Molecular Function:protein binding (GO:0005515),Molecular Function:ATP binding (GO:0005524),Biological Process:protein phosphorylation (GO:0006468)
CAFS_HM_T_00057622	1	Molecular Function:nucleic acid binding (GO:0003676)
CAFS_HM_T_00062863	1	Biological Process:lipid metabolic process (GO:0006629)
CAFS_HM_T_00019043	1	Molecular Function:protein binding (GO:0005515)
CAFS_HM_T_00038965	--	--
CAFS_HM_T_00057480	--	--
CAFS_HM_T_00062757	3	Biological Process:protein peptidyl-prolyl isomerization (GO:0000413),Molecular Function:peptidyl-prolyl cis-trans isomerase activity (GO:0003755),Biological Process:protein folding (GO:0006457)
CAFS_HM_T_00043105	4	Molecular Function:signal transducer activity (GO:0004871),Cellular Component:heterotrimeric G-protein complex (GO:0005834),Biological Process:G-protein coupled receptor signaling pathway (GO:0007186),Biological Process:intracellular signal transduction (GO:0035556)
CAFS_HM_T_00004548	1	Molecular Function:protein binding (GO:0005515)
CAFS_HM_T_00010173	1	Molecular Function:protein binding (GO:0005515)
CAFS_HM_T_00032817	1	Molecular Function:GTP binding (GO:0005525)
CAFS_HM_T_00046550	3	Molecular Function:protein binding (GO:0005515),Molecular Function:metal ion binding (GO:0046872),Biological Process:oxidation-reduction process (GO:0055114)
CAFS_HM_T_00082980	1	Biological Process:cell redox homeostasis (GO:0045454)
CAFS_HM_T_00072570	--	--
CAFS_HM_T_00058804	--	--
CAFS_HM_T_00049194	2	Biological Process:protein deubiquitination (GO:0016579),Molecular Function:thiol-dependent ubiquitinyl hydrolase activity (GO:0036459)
CAFS_HM_T_00034024	2	Cellular Component:exocyst (GO:0000145),Biological Process:exocytosis (GO:0006887)
CAFS_HM_T_00015305	1	Molecular Function:protein binding (GO:0005515)
CAFS_HM_T_00068693	--	--
CAFS_HM_T_00059139	3	Molecular Function:protein kinase activity (GO:0004672),Molecular Function:ATP binding (GO:0005524),Biological Process:protein phosphorylation (GO:0006468)
CAFS_HM_T_00051022	1	Molecular Function:GTP binding (GO:0005525)
CAFS_HM_T_00082878	2	Molecular Function:protein tyrosine phosphatase activity (GO:0004725),Biological Process:protein dephosphorylation (GO:0006470)
CAFS_HM_T_00075335	2	Molecular Function:protein binding (GO:0005515),Molecular Function:zinc ion binding (GO:0008270)
CAFS_HM_T_00065524	3	Molecular Function:ionotropic glutamate receptor activity (GO:0004970),Molecular Function:extracellular-glutamate-gated ion channel activity (GO:0005234),Cellular Component:membrane (GO:0016020)
CAFS_HM_T_00065267	1	Molecular Function:protein binding (GO:0005515)
CAFS_HM_T_00029081	5	Molecular Function:actin binding (GO:0003779),Molecular Function:structural molecule activity (GO:0005198),Cellular Component:cytoskeleton (GO:0005856),Molecular Function:cytoskeletal protein binding (GO:0008092),Biological Process:cortical actin cytoskeleton organization (GO:0030866)
CAFS_HM_T_00081537	--	--
CAFS_HM_T_00091423	--	--
CAFS_HM_T_00087621	3	Molecular Function:copper ion binding (GO:0005507),Molecular Function:oxidoreductase activity (GO:0016491),Biological Process:oxidation-reduction process (GO:0055114)
CAFS_HM_T_00003809	1	Molecular Function:nucleic acid binding (GO:0003676)
CAFS_HM_T_00079116	1	Molecular Function:catalytic activity (GO:0003824)
CAFS_HM_T_00081646	2	Biological Process:proteolysis (GO:0006508),Molecular Function:dipeptidase activity (GO:0016805)
CAFS_HM_T_00015571	2	Molecular Function:catalytic activity (GO:0003824),Biological Process:metabolic process (GO:0008152)
CAFS_HM_T_00016387	2	Molecular Function:translation elongation factor activity (GO:0003746),Biological Process:translational elongation (GO:0006414)
CAFS_HM_T_00027955	--	--
CAFS_HM_T_00024304	--	--
CAFS_HM_T_00051738	2	Molecular Function:nucleic acid binding (GO:0003676),Molecular Function:DNA binding (GO:0003677)
CAFS_HM_T_00036302	3	Molecular Function:ubiquitin-protein transferase activity (GO:0004842),Molecular Function:protein binding (GO:0005515),Biological Process:protein ubiquitination (GO:0016567)
CAFS_HM_T_00038498	--	--
CAFS_HM_T_00050022	1	Molecular Function:nucleic acid binding (GO:0003676)
CAFS_HM_T_00088450	1	Molecular Function:protein binding (GO:0005515)
CAFS_HM_T_00030865	--	--
CAFS_HM_T_00030749	--	--
CAFS_HM_T_00072140	--	--
CAFS_HM_T_00091334	1	Molecular Function:protein binding (GO:0005515)
CAFS_HM_T_00043146	--	--
CAFS_HM_T_00001446	2	Molecular Function:oxidoreductase activity (GO:0016491),Biological Process:oxidation-reduction process (GO:0055114)
CAFS_HM_T_00006758	--	--
CAFS_HM_T_00085948	2	Molecular Function:metalloendopeptidase activity (GO:0004222),Biological Process:proteolysis (GO:0006508)
CAFS_HM_T_00017410	--	--
CAFS_HM_T_00015603	2	Molecular Function:GTP binding (GO:0005525),Biological Process:small GTPase mediated signal transduction (GO:0007264)
CAFS_HM_T_00014748	4	Molecular Function:acyl-CoA dehydrogenase activity (GO:0003995),Biological Process:metabolic process (GO:0008152),Molecular Function:flavin adenine dinucleotide binding (GO:0050660),Biological Process:oxidation-reduction process (GO:0055114)
CAFS_HM_T_00077726	1	Molecular Function:calcium ion binding (GO:0005509)
CAFS_HM_T_00073966	--	--
CAFS_HM_T_00016804	--	--
CAFS_HM_T_00042046	--	--
CAFS_HM_T_00020406	5	Molecular Function:protein kinase activity (GO:0004672),Molecular Function:protein serine/threonine kinase activity (GO:0004674),Molecular Function:ATP binding (GO:0005524),Biological Process:protein phosphorylation (GO:0006468),Biological Process:intracellular signal transduction (GO:0035556)
CAFS_HM_T_00071120	4	Molecular Function:serine-type endopeptidase inhibitor activity (GO:0004867),Molecular Function:heparin binding (GO:0008201),Cellular Component:integral component of membrane (GO:0016021),Molecular Function:transition metal ion binding (GO:0046914)
CAFS_HM_T_00029076	1	Molecular Function:protein binding (GO:0005515)
CAFS_HM_T_00011605	--	--
CAFS_HM_T_00086233	--	--
CAFS_HM_T_00020208	--	--
CAFS_HM_T_00020686	1	Molecular Function:phosphatidylinositol binding (GO:0035091)
CAFS_HM_T_00068852	1	Molecular Function:RNA binding (GO:0003723)
CAFS_HM_T_00016649	--	--
CAFS_HM_T_00014234	--	--
CAFS_HM_T_00013087	1	Molecular Function:protein binding (GO:0005515)
CAFS_HM_T_00027040	2	Cellular Component:mitochondrial inner membrane (GO:0005743),Biological Process:respiratory electron transport chain (GO:0022904)
CAFS_HM_T_00013573	1	Molecular Function:protein binding (GO:0005515)
CAFS_HM_T_00044414	1	Molecular Function:protein binding (GO:0005515)
CAFS_HM_T_00068173	1	Molecular Function:DNA binding (GO:0003677)
CAFS_HM_T_00032538	3	Molecular Function:protein kinase activity (GO:0004672),Molecular Function:ATP binding (GO:0005524),Biological Process:protein phosphorylation (GO:0006468)
CAFS_HM_T_00073569	2	Molecular Function:Rho guanyl-nucleotide exchange factor activity (GO:0005089),Biological Process:regulation of Rho protein signal transduction (GO:0035023)
CAFS_HM_T_00031399	2	Molecular Function:serine-type endopeptidase activity (GO:0004252),Biological Process:proteolysis (GO:0006508)
CAFS_HM_T_00018055	4	Molecular Function:microtubule motor activity (GO:0003777),Molecular Function:ATP binding (GO:0005524),Biological Process:microtubule-based movement (GO:0007018),Molecular Function:microtubule binding (GO:0008017)
CAFS_HM_T_00016082	--	--
CAFS_HM_T_00079021	2	Molecular Function:UDP-glucose:glycoprotein glucosyltransferase activity (GO:0003980),Biological Process:protein glycosylation (GO:0006486)
CAFS_HM_T_00028073	1	Molecular Function:S-adenosylmethionine-dependent methyltransferase activity (GO:0008757)
CAFS_HM_T_00037591	4	Molecular Function:extracellular ligand-gated ion channel activity (GO:0005230),Biological Process:transport (GO:0006810),Biological Process:ion transport (GO:0006811),Cellular Component:membrane (GO:0016020)
CAFS_HM_T_00036942	2	Biological Process:cell adhesion (GO:0007155),Molecular Function:actin filament binding (GO:0051015)
CAFS_HM_T_00074014	1	Molecular Function:nucleic acid binding (GO:0003676)
CAFS_HM_T_00056873	4	Molecular Function:Rab geranylgeranyltransferase activity (GO:0004663),Molecular Function:zinc ion binding (GO:0008270),Molecular Function:protein prenyltransferase activity (GO:0008318),Biological Process:protein prenylation (GO:0018342)
CAFS_HM_T_00034062	--	--
CAFS_HM_T_00074929	1	Biological Process:metabolic process (GO:0008152)
CAFS_HM_T_00085228	--	--
CAFS_HM_T_00004909	2	Molecular Function:calcium ion binding (GO:0005509),Molecular Function:calcium-dependent phospholipid binding (GO:0005544)
CAFS_HM_T_00006344	--	--
CAFS_HM_T_00079833	2	Molecular Function:catalytic activity (GO:0003824),Biological Process:metabolic process (GO:0008152)
CAFS_HM_T_00028216	3	Molecular Function:iron ion binding (GO:0005506),Molecular Function:heme binding (GO:0020037),Biological Process:oxidation-reduction process (GO:0055114)
CAFS_HM_T_00004612	1	Molecular Function:catalytic activity (GO:0003824)
CAFS_HM_T_00059242	3	Molecular Function:protein kinase activity (GO:0004672),Molecular Function:ATP binding (GO:0005524),Biological Process:protein phosphorylation (GO:0006468)
CAFS_HM_T_00068867	3	Molecular Function:protein kinase activity (GO:0004672),Molecular Function:ATP binding (GO:0005524),Biological Process:protein phosphorylation (GO:0006468)
CAFS_HM_T_00020089	1	Molecular Function:protein binding (GO:0005515)
CAFS_HM_T_00084703	--	--
CAFS_HM_T_00049169	1	Molecular Function:protein binding (GO:0005515)
CAFS_HM_T_00057974	2	Cellular Component:endoplasmic reticulum membrane (GO:0005789),Biological Process:protein N-linked glycosylation via asparagine (GO:0018279)
CAFS_HM_T_00034712	3	Molecular Function:magnesium ion binding (GO:0000287),Molecular Function:ribose phosphate diphosphokinase activity (GO:0004749),Biological Process:nucleotide biosynthetic process (GO:0009165)
CAFS_HM_T_00004178	--	--
CAFS_HM_T_00000550	1	Molecular Function:protein binding (GO:0005515)
CAFS_HM_T_00007414	3	Molecular Function:protein binding (GO:0005515),Cellular Component:intracellular (GO:0005622),Molecular Function:zinc ion binding (GO:0008270)
CAFS_HM_T_00007028	1	Molecular Function:protein binding (GO:0005515)
CAFS_HM_T_00008685	2	Molecular Function:DNA binding (GO:0003677),Biological Process:signal transduction (GO:0007165)
CAFS_HM_T_00022716	2	Molecular Function:protein binding (GO:0005515),Molecular Function:metal ion binding (GO:0046872)
CAFS_HM_T_00005862	1	Biological Process:lipid metabolic process (GO:0006629)
CAFS_HM_T_00080766	--	--
CAFS_HM_T_00052379	3	Biological Process:tubulin complex assembly (GO:0007021),Biological Process:post-chaperonin tubulin folding pathway (GO:0007023),Molecular Function:beta-tubulin binding (GO:0048487)
CAFS_HM_T_00077100	--	--
CAFS_HM_T_00068655	5	Molecular Function:glycine dehydrogenase (decarboxylating) activity (GO:0004375),Biological Process:cellular amino acid metabolic process (GO:0006520),Biological Process:glycine catabolic process (GO:0006546),Molecular Function:lyase activity (GO:0016829),Biological Process:oxidation-reduction process (GO:0055114)
CAFS_HM_T_00080849	1	Molecular Function:protein binding (GO:0005515)
CAFS_HM_T_00070268	--	--
CAFS_HM_T_00081377	--	--
CAFS_HM_T_00063581	2	Molecular Function:cytochrome-c oxidase activity (GO:0004129),Cellular Component:mitochondrial inner membrane (GO:0005743)
CAFS_HM_T_00022599	2	Molecular Function:poly(ADP-ribose) glycohydrolase activity (GO:0004649),Biological Process:carbohydrate metabolic process (GO:0005975)
CAFS_HM_T_00051509	4	Molecular Function:protein kinase activity (GO:0004672),Molecular Function:protein serine/threonine kinase activity (GO:0004674),Molecular Function:ATP binding (GO:0005524),Biological Process:protein phosphorylation (GO:0006468)
CAFS_HM_T_00082791	1	Molecular Function:phospholipid binding (GO:0005543)
CAFS_HM_T_00059977	1	Molecular Function:protein binding (GO:0005515)
CAFS_HM_T_00036986	--	--
CAFS_HM_T_00043781	3	Molecular Function:DNA binding (GO:0003677),Molecular Function:DNA-directed 5'-3' RNA polymerase activity (GO:0003899),Biological Process:transcription from RNA polymerase II promoter (GO:0006366)
CAFS_HM_T_00091939	--	--
CAFS_HM_T_00080714	4	Molecular Function:microtubule motor activity (GO:0003777),Molecular Function:ATP binding (GO:0005524),Biological Process:microtubule-based movement (GO:0007018),Molecular Function:microtubule binding (GO:0008017)
CAFS_HM_T_00067320	1	Molecular Function:catalytic activity (GO:0003824)
CAFS_HM_T_00081183	2	Molecular Function:GTP binding (GO:0005525),Biological Process:small GTPase mediated signal transduction (GO:0007264)
CAFS_HM_T_00081621	4	Molecular Function:catalytic activity (GO:0003824),Molecular Function:oxidoreductase activity (GO:0016491),Molecular Function:flavin adenine dinucleotide binding (GO:0050660),Biological Process:oxidation-reduction process (GO:0055114)
CAFS_HM_T_00032931	3	Molecular Function:nucleic acid binding (GO:0003676),Molecular Function:RNA binding (GO:0003723),Molecular Function:translation initiation factor activity (GO:0003743)
CAFS_HM_T_00069429	--	--
CAFS_HM_T_00021002	4	Molecular Function:protein kinase activity (GO:0004672),Molecular Function:protein serine/threonine kinase activity (GO:0004674),Molecular Function:ATP binding (GO:0005524),Biological Process:protein phosphorylation (GO:0006468)
CAFS_HM_T_00071568	--	--
CAFS_HM_T_00038668	--	--
CAFS_HM_T_00054614	--	--
CAFS_HM_T_00034249	--	--
CAFS_HM_T_00034080	--	--
CAFS_HM_T_00050106	--	--
CAFS_HM_T_00053267	--	--
CAFS_HM_T_00034327	2	Biological Process:protein deubiquitination (GO:0016579),Molecular Function:thiol-dependent ubiquitinyl hydrolase activity (GO:0036459)
CAFS_HM_T_00051148	1	Molecular Function:actin binding (GO:0003779)
CAFS_HM_T_00033535	1	Biological Process:cell redox homeostasis (GO:0045454)
CAFS_HM_T_00039989	--	--
CAFS_HM_T_00080422	1	Molecular Function:RNA binding (GO:0003723)
CAFS_HM_T_00011193	1	Molecular Function:protein binding (GO:0005515)
CAFS_HM_T_00029577	1	Molecular Function:adenylate kinase activity (GO:0004017)
CAFS_HM_T_00067071	4	Molecular Function:antioxidant activity (GO:0016209),Molecular Function:oxidoreductase activity (GO:0016491),Molecular Function:peroxiredoxin activity (GO:0051920),Biological Process:oxidation-reduction process (GO:0055114)
CAFS_HM_T_00021066	--	--
CAFS_HM_T_00043814	2	Molecular Function:protein binding (GO:0005515),Cellular Component:membrane (GO:0016020)
CAFS_HM_T_00046939	1	Molecular Function:nucleic acid binding (GO:0003676)
CAFS_HM_T_00062600	--	--
CAFS_HM_T_00067097	2	Molecular Function:phospholipase activity (GO:0004620),Biological Process:phospholipid catabolic process (GO:0009395)
CAFS_HM_T_00088749	--	--
CAFS_HM_T_00067532	3	Molecular Function:structural constituent of ribosome (GO:0003735),Cellular Component:ribosome (GO:0005840),Biological Process:translation (GO:0006412)
CAFS_HM_T_00067617	3	Molecular Function:iron ion binding (GO:0005506),Biological Process:iron-sulfur cluster assembly (GO:0016226),Molecular Function:iron-sulfur cluster binding (GO:0051536)
CAFS_HM_T_00041469	2	Molecular Function:oxidoreductase activity (GO:0016491),Biological Process:oxidation-reduction process (GO:0055114)
CAFS_HM_T_00051634	--	--
CAFS_HM_T_00036451	3	Molecular Function:3-beta-hydroxy-delta5-steroid dehydrogenase activity (GO:0003854),Biological Process:steroid biosynthetic process (GO:0006694),Biological Process:oxidation-reduction process (GO:0055114)
CAFS_HM_T_00088947	--	--
CAFS_HM_T_00057665	--	--
CAFS_HM_T_00046569	1	Molecular Function:DNA binding (GO:0003677)
CAFS_HM_T_00065384	--	--
CAFS_HM_T_00008270	3	Molecular Function:heme oxygenase (decyclizing) activity (GO:0004392),Biological Process:heme oxidation (GO:0006788),Biological Process:oxidation-reduction process (GO:0055114)
CAFS_HM_T_00016444	1	Molecular Function:protein binding (GO:0005515)
CAFS_HM_T_00013595	1	Molecular Function:protein binding (GO:0005515)
CAFS_HM_T_00049726	3	Biological Process:metabolic process (GO:0008152),Molecular Function:oxidoreductase activity (GO:0016491),Biological Process:oxidation-reduction process (GO:0055114)
CAFS_HM_T_00040233	--	--
CAFS_HM_T_00006578	1	Molecular Function:protein binding (GO:0005515)
CAFS_HM_T_00043054	1	Molecular Function:acid phosphatase activity (GO:0003993)
CAFS_HM_T_00075498	1	Biological Process:phosphatidylinositol phosphorylation (GO:0046854)
CAFS_HM_T_00084054	--	--
CAFS_HM_T_00042301	1	Molecular Function:sulfate adenylyltransferase (ATP) activity (GO:0004781)
CAFS_HM_T_00062228	--	--
CAFS_HM_T_00025150	1	Molecular Function:nucleic acid binding (GO:0003676)
CAFS_HM_T_00041049	--	--
CAFS_HM_T_00089758	3	Cellular Component:protein phosphatase type 2A complex (GO:0000159),Biological Process:signal transduction (GO:0007165),Molecular Function:protein phosphatase regulator activity (GO:0019888)
CAFS_HM_T_00042865	--	--
CAFS_HM_T_00074234	--	--
CAFS_HM_T_00084171	1	Molecular Function:protein binding (GO:0005515)
CAFS_HM_T_00027158	--	--
CAFS_HM_T_00049501	1	Molecular Function:protein binding (GO:0005515)
CAFS_HM_T_00045348	1	Molecular Function:kinase activity (GO:0016301)
CAFS_HM_T_00007742	--	--
CAFS_HM_T_00046216	4	Molecular Function:Rho guanyl-nucleotide exchange factor activity (GO:0005089),Molecular Function:protein binding (GO:0005515),Cellular Component:cytoplasm (GO:0005737),Biological Process:regulation of Rho protein signal transduction (GO:0035023)
CAFS_HM_T_00033904	4	Molecular Function:actin binding (GO:0003779),Biological Process:cellular component organization (GO:0016043),Molecular Function:Rho GTPase binding (GO:0017048),Biological Process:actin cytoskeleton organization (GO:0030036)
CAFS_HM_T_00058389	1	Molecular Function:GTP binding (GO:0005525)
CAFS_HM_T_00026281	2	Molecular Function:catalytic activity (GO:0003824),Biological Process:metabolic process (GO:0008152)
CAFS_HM_T_00063446	--	--
CAFS_HM_T_00037855	3	Molecular Function:coproporphyrinogen oxidase activity (GO:0004109),Biological Process:porphyrin-containing compound biosynthetic process (GO:0006779),Biological Process:oxidation-reduction process (GO:0055114)
CAFS_HM_T_00031276	--	--
CAFS_HM_T_00071720	--	--
CAFS_HM_T_00036845	3	Molecular Function:RNA binding (GO:0003723),Molecular Function:protein binding (GO:0005515),Biological Process:RNA metabolic process (GO:0016070)
CAFS_HM_T_00009377	1	Molecular Function:protein binding (GO:0005515)
CAFS_HM_T_00045393	--	--
CAFS_HM_T_00074581	3	Molecular Function:protein kinase activity (GO:0004672),Molecular Function:ATP binding (GO:0005524),Biological Process:protein phosphorylation (GO:0006468)
CAFS_HM_T_00082173	1	Molecular Function:calcium ion binding (GO:0005509)
CAFS_HM_T_00073685	1	Biological Process:carbohydrate metabolic process (GO:0005975)
CAFS_HM_T_00087354	3	Molecular Function:3',5'-cyclic-nucleotide phosphodiesterase activity (GO:0004114),Molecular Function:protein binding (GO:0005515),Biological Process:signal transduction (GO:0007165)
CAFS_HM_T_00077349	1	Molecular Function:protein binding (GO:0005515)
CAFS_HM_T_00073611	1	Molecular Function:protein binding (GO:0005515)
CAFS_HM_T_00057997	2	Molecular Function:electron carrier activity (GO:0009055),Molecular Function:iron-sulfur cluster binding (GO:0051536)
CAFS_HM_T_00033764	1	Molecular Function:protein binding (GO:0005515)
CAFS_HM_T_00016582	--	--
CAFS_HM_T_00011742	--	--
CAFS_HM_T_00086072	--	--
CAFS_HM_T_00008400	1	Molecular Function:protein binding (GO:0005515)
CAFS_HM_T_00021212	--	--
CAFS_HM_T_00042807	1	Molecular Function:GTPase activator activity (GO:0005096)
CAFS_HM_T_00027612	--	--
CAFS_HM_T_00009332	--	--
CAFS_HM_T_00076215	2	Molecular Function:oxidoreductase activity (GO:0016491),Biological Process:oxidation-reduction process (GO:0055114)
CAFS_HM_T_00062928	2	Biological Process:protein transport (GO:0015031),Cellular Component:integral component of membrane (GO:0016021)
CAFS_HM_T_00062656	3	Molecular Function:protein kinase activity (GO:0004672),Molecular Function:ATP binding (GO:0005524),Biological Process:protein phosphorylation (GO:0006468)
CAFS_HM_T_00068503	2	Molecular Function:hyaluronic acid binding (GO:0005540),Biological Process:cell adhesion (GO:0007155)
CAFS_HM_T_00072939	3	Cellular Component:endoplasmic reticulum (GO:0005783),Molecular Function:heparin binding (GO:0008201),Molecular Function:low-density lipoprotein particle receptor binding (GO:0050750)
CAFS_HM_T_00038843	1	Molecular Function:protein binding (GO:0005515)
CAFS_HM_T_00050053	1	Molecular Function:RNA binding (GO:0003723)
CAFS_HM_T_00028145	7	Molecular Function:nucleic acid binding (GO:0003676),Molecular Function:catalytic activity (GO:0003824),Molecular Function:scavenger receptor activity (GO:0005044),Biological Process:immune response (GO:0006955),Molecular Function:hydrolase activity (GO:0016787),Molecular Function:polysaccharide binding (GO:0030247),Molecular Function:metal ion binding (GO:0046872)
CAFS_HM_T_00003795	--	--
CAFS_HM_T_00031912	2	Biological Process:intracellular protein transport (GO:0006886),Biological Process:vesicle-mediated transport (GO:0016192)
CAFS_HM_T_00090002	2	Molecular Function:actin binding (GO:0003779),Cellular Component:intracellular (GO:0005622)
CAFS_HM_T_00086451	4	Molecular Function:acyl-CoA dehydrogenase activity (GO:0003995),Biological Process:metabolic process (GO:0008152),Molecular Function:flavin adenine dinucleotide binding (GO:0050660),Biological Process:oxidation-reduction process (GO:0055114)
CAFS_HM_T_00041807	1	Molecular Function:N-acetyltransferase activity (GO:0008080)
CAFS_HM_T_00013802	2	Molecular Function:GTPase activator activity (GO:0005096),Molecular Function:growth factor activity (GO:0008083)
CAFS_HM_T_00054880	3	Molecular Function:G-protein coupled receptor activity (GO:0004930),Biological Process:G-protein coupled receptor signaling pathway (GO:0007186),Cellular Component:integral component of membrane (GO:0016021)
CAFS_HM_T_00042621	--	--
CAFS_HM_T_00082678	4	Molecular Function:protein kinase activity (GO:0004672),Molecular Function:protein binding (GO:0005515),Molecular Function:ATP binding (GO:0005524),Biological Process:protein phosphorylation (GO:0006468)
CAFS_HM_T_00032624	1	Molecular Function:zinc ion binding (GO:0008270)
CAFS_HM_T_00060353	1	Molecular Function:protein binding (GO:0005515)
CAFS_HM_T_00027887	--	--
CAFS_HM_T_00091274	--	--
CAFS_HM_T_00030573	3	Molecular Function:Rho guanyl-nucleotide exchange factor activity (GO:0005089),Biological Process:regulation of Rho protein signal transduction (GO:0035023),Biological Process:intracellular signal transduction (GO:0035556)
CAFS_HM_T_00007071	--	--
CAFS_HM_T_00011481	2	Molecular Function:GTP binding (GO:0005525),Biological Process:small GTPase mediated signal transduction (GO:0007264)
CAFS_HM_T_00032332	6	Molecular Function:catalytic activity (GO:0003824),Molecular Function:formate-tetrahydrofolate ligase activity (GO:0004329),Molecular Function:methylenetetrahydrofolate dehydrogenase (NADP+) activity (GO:0004488),Molecular Function:ATP binding (GO:0005524),Biological Process:folic acid-containing compound biosynthetic process (GO:0009396),Biological Process:oxidation-reduction process (GO:0055114)
CAFS_HM_T_00033012	2	Molecular Function:GTP binding (GO:0005525),Biological Process:small GTPase mediated signal transduction (GO:0007264)
CAFS_HM_T_00049093	3	Molecular Function:protein binding (GO:0005515),Biological Process:protein deubiquitination (GO:0016579),Molecular Function:thiol-dependent ubiquitinyl hydrolase activity (GO:0036459)
CAFS_HM_T_00071613	3	Molecular Function:aminopeptidase activity (GO:0004177),Cellular Component:intracellular (GO:0005622),Biological Process:proteolysis (GO:0006508)
CAFS_HM_T_00080541	--	--
CAFS_HM_T_00000614	--	--
CAFS_HM_T_00005721	1	Molecular Function:protein binding (GO:0005515)
CAFS_HM_T_00013385	3	Molecular Function:structural constituent of ribosome (GO:0003735),Cellular Component:ribosome (GO:0005840),Biological Process:translation (GO:0006412)
CAFS_HM_T_00035644	1	Molecular Function:protein binding (GO:0005515)
CAFS_HM_T_00029421	--	--
CAFS_HM_T_00081590	2	Molecular Function:GTP binding (GO:0005525),Biological Process:small GTPase mediated signal transduction (GO:0007264)
CAFS_HM_T_00016811	--	--
CAFS_HM_T_00056507	1	Molecular Function:protein binding (GO:0005515)
CAFS_HM_T_00061256	1	Molecular Function:small protein activating enzyme activity (GO:0008641)
CAFS_HM_T_00048672	2	Biological Process:biosynthetic process (GO:0009058),Molecular Function:pyridoxal phosphate binding (GO:0030170)
CAFS_HM_T_00013438	1	Molecular Function:calcium ion binding (GO:0005509)
CAFS_HM_T_00036477	2	Molecular Function:fructose-bisphosphate aldolase activity (GO:0004332),Biological Process:glycolytic process (GO:0006096)
CAFS_HM_T_00059559	4	Molecular Function:protein kinase activity (GO:0004672),Molecular Function:protein serine/threonine kinase activity (GO:0004674),Molecular Function:ATP binding (GO:0005524),Biological Process:protein phosphorylation (GO:0006468)
CAFS_HM_T_00047334	2	Molecular Function:GTP binding (GO:0005525),Biological Process:small GTPase mediated signal transduction (GO:0007264)
CAFS_HM_T_00023185	2	Molecular Function:ARF guanyl-nucleotide exchange factor activity (GO:0005086),Biological Process:regulation of ARF protein signal transduction (GO:0032012)
CAFS_HM_T_00084565	--	--
CAFS_HM_T_00006560	1	Molecular Function:nucleic acid binding (GO:0003676)
CAFS_HM_T_00007772	--	--
CAFS_HM_T_00052415	1	Molecular Function:protein binding (GO:0005515)
CAFS_HM_T_00022405	--	--
CAFS_HM_T_00052356	3	Molecular Function:threonine-type endopeptidase activity (GO:0004298),Cellular Component:proteasome core complex (GO:0005839),Biological Process:proteolysis involved in cellular protein catabolic process (GO:0051603)
CAFS_HM_T_00031881	1	Molecular Function:nucleic acid binding (GO:0003676)
CAFS_HM_T_00028967	1	Molecular Function:protein binding (GO:0005515)
CAFS_HM_T_00010280	--	--
CAFS_HM_T_00060998	1	Molecular Function:protein binding (GO:0005515)
CAFS_HM_T_00059317	5	Molecular Function:ATP binding (GO:0005524),Biological Process:transport (GO:0006810),Cellular Component:integral component of membrane (GO:0016021),Molecular Function:ATPase activity (GO:0016887),Biological Process:transmembrane transport (GO:0055085)
CAFS_HM_T_00090088	1	Molecular Function:catalytic activity (GO:0003824)
CAFS_HM_T_00050789	2	Biological Process:protein transport (GO:0015031),Cellular Component:integral component of membrane (GO:0016021)
CAFS_HM_T_00030553	--	--
CAFS_HM_T_00006023	1	Molecular Function:protein binding (GO:0005515)
CAFS_HM_T_00079159	2	Cellular Component:cytoplasm (GO:0005737),Biological Process:protein folding (GO:0006457)
CAFS_HM_T_00078927	1	Molecular Function:protein binding (GO:0005515)
CAFS_HM_T_00085776	--	--
CAFS_HM_T_00015573	2	Molecular Function:Rho GDP-dissociation inhibitor activity (GO:0005094),Cellular Component:cytoplasm (GO:0005737)
CAFS_HM_T_00028854	1	Molecular Function:structural constituent of myelin sheath (GO:0019911)
CAFS_HM_T_00073412	3	Molecular Function:phosphoribosylamine-glycine ligase activity (GO:0004637),Biological Process:biosynthetic process (GO:0009058),Biological Process:purine nucleobase biosynthetic process (GO:0009113)
CAFS_HM_T_00087737	--	--
CAFS_HM_T_00076108	1	Molecular Function:protein binding (GO:0005515)
CAFS_HM_T_00011027	2	Molecular Function:cytochrome-c oxidase activity (GO:0004129),Cellular Component:mitochondrial inner membrane (GO:0005743)
CAFS_HM_T_00047833	--	--
CAFS_HM_T_00023274	--	--
CAFS_HM_T_00036021	2	Molecular Function:GTP binding (GO:0005525),Biological Process:small GTPase mediated signal transduction (GO:0007264)
CAFS_HM_T_00085217	5	Molecular Function:endopeptidase activity (GO:0004175),Molecular Function:threonine-type endopeptidase activity (GO:0004298),Cellular Component:proteasome core complex (GO:0005839),Biological Process:ubiquitin-dependent protein catabolic process (GO:0006511),Biological Process:proteolysis involved in cellular protein catabolic process (GO:0051603)
CAFS_HM_T_00044146	1	Molecular Function:protein binding (GO:0005515)
CAFS_HM_T_00076189	2	Molecular Function:protein binding (GO:0005515),Molecular Function:histone binding (GO:0042393)
CAFS_HM_T_00067443	2	Molecular Function:catalytic activity (GO:0003824),Biological Process:metabolic process (GO:0008152)
CAFS_HM_T_00065807	1	Molecular Function:protein binding (GO:0005515)
CAFS_HM_T_00035362	2	Molecular Function:DNA binding (GO:0003677),Molecular Function:DNA-directed 5'-3' RNA polymerase activity (GO:0003899)
CAFS_HM_T_00014640	1	Molecular Function:protein binding (GO:0005515)
CAFS_HM_T_00088045	--	--
CAFS_HM_T_00049002	5	Molecular Function:metalloendopeptidase activity (GO:0004222),Molecular Function:ATP binding (GO:0005524),Biological Process:proteolysis (GO:0006508),Molecular Function:zinc ion binding (GO:0008270),Cellular Component:integral component of membrane (GO:0016021)
CAFS_HM_T_00046121	1	Molecular Function:protein binding (GO:0005515)
CAFS_HM_T_00027576	--	--
CAFS_HM_T_00059476	--	--
CAFS_HM_T_00074089	3	Molecular Function:glutathione peroxidase activity (GO:0004602),Biological Process:response to oxidative stress (GO:0006979),Biological Process:oxidation-reduction process (GO:0055114)
CAFS_HM_T_00077881	2	Biological Process:biosynthetic process (GO:0009058),Molecular Function:nucleotidyltransferase activity (GO:0016779)
CAFS_HM_T_00063326	2	Cellular Component:nucleus (GO:0005634),Biological Process:nucleosome assembly (GO:0006334)
CAFS_HM_T_00019438	4	Cellular Component:Arp2/3 protein complex (GO:0005885),Cellular Component:actin cytoskeleton (GO:0015629),Biological Process:actin filament polymerization (GO:0030041),Biological Process:Arp2/3 complex-mediated actin nucleation (GO:0034314)
CAFS_HM_T_00036925	--	--
CAFS_HM_T_00052939	--	--
CAFS_HM_T_00071407	5	Molecular Function:structural molecule activity (GO:0005198),Biological Process:intracellular protein transport (GO:0006886),Biological Process:vesicle-mediated transport (GO:0016192),Cellular Component:clathrin coat of trans-Golgi network vesicle (GO:0030130),Cellular Component:clathrin coat of coated pit (GO:0030132)
CAFS_HM_T_00041274	2	Cellular Component:exocyst (GO:0000145),Biological Process:exocytosis (GO:0006887)
CAFS_HM_T_00064915	3	Molecular Function:protein kinase activity (GO:0004672),Molecular Function:ATP binding (GO:0005524),Biological Process:protein phosphorylation (GO:0006468)
CAFS_HM_T_00038596	1	Cellular Component:membrane (GO:0016020)
CAFS_HM_T_00044873	4	Molecular Function:metalloendopeptidase activity (GO:0004222),Biological Process:proteolysis (GO:0006508),Molecular Function:zinc ion binding (GO:0008270),Cellular Component:extracellular matrix (GO:0031012)
CAFS_HM_T_00066111	2	Molecular Function:protein binding (GO:0005515),Biological Process:regulation of GTPase activity (GO:0043087)
CAFS_HM_T_00088288	3	Molecular Function:endopeptidase inhibitor activity (GO:0004866),Cellular Component:extracellular region (GO:0005576),Cellular Component:extracellular space (GO:0005615)
CAFS_HM_T_00077702	--	--
CAFS_HM_T_00035408	1	Molecular Function:protein binding (GO:0005515)
CAFS_HM_T_00062851	1	Molecular Function:protein binding (GO:0005515)
CAFS_HM_T_00068850	5	Molecular Function:GTPase activity (GO:0003924),Molecular Function:signal transducer activity (GO:0004871),Biological Process:G-protein coupled receptor signaling pathway (GO:0007186),Molecular Function:guanyl nucleotide binding (GO:0019001),Molecular Function:G-protein beta/gamma-subunit complex binding (GO:0031683)
CAFS_HM_T_00089954	5	Molecular Function:endopeptidase activity (GO:0004175),Molecular Function:threonine-type endopeptidase activity (GO:0004298),Cellular Component:proteasome core complex (GO:0005839),Biological Process:ubiquitin-dependent protein catabolic process (GO:0006511),Biological Process:proteolysis involved in cellular protein catabolic process (GO:0051603)
CAFS_HM_T_00035312	--	--
CAFS_HM_T_00036785	1	Cellular Component:intracellular membrane-bounded organelle (GO:0043231)
CAFS_HM_T_00013467	3	Molecular Function:protein kinase activity (GO:0004672),Molecular Function:ATP binding (GO:0005524),Biological Process:protein phosphorylation (GO:0006468)
CAFS_HM_T_00045282	--	--
CAFS_HM_T_00071730	4	Molecular Function:structural constituent of ribosome (GO:0003735),Cellular Component:ribosome (GO:0005840),Biological Process:translation (GO:0006412),Molecular Function:rRNA binding (GO:0019843)
CAFS_HM_T_00041749	1	Molecular Function:GTP binding (GO:0005525)
CAFS_HM_T_00091304	4	Molecular Function:signal transducer activity (GO:0004871),Cellular Component:heterotrimeric G-protein complex (GO:0005834),Biological Process:G-protein coupled receptor signaling pathway (GO:0007186),Biological Process:intracellular signal transduction (GO:0035556)
CAFS_HM_T_00071297	6	Molecular Function:protein kinase activity (GO:0004672),Molecular Function:protein serine/threonine kinase activity (GO:0004674),Molecular Function:protein binding (GO:0005515),Molecular Function:ATP binding (GO:0005524),Biological Process:protein phosphorylation (GO:0006468),Biological Process:intracellular signal transduction (GO:0035556)
CAFS_HM_T_00067610	1	Molecular Function:hydrolase activity (GO:0016787)
CAFS_HM_T_00043065	1	Molecular Function:O-methyltransferase activity (GO:0008171)
CAFS_HM_T_00003358	1	Molecular Function:protein binding (GO:0005515)
[truncated: 6,355 more rows]

## Sheet: COG_anno
COG annotation of total quantified proteins in brain.
Protein	COG_Function_Description	COG_Function_Class	COG_Class_Description
CAFS_HM_T_00091449	--	--	--
CAFS_HM_T_00052219	--	--	--
CAFS_HM_T_00052961	--	--	--
CAFS_HM_T_00028830	--	--	--
CAFS_HM_T_00007488	--	--	--
CAFS_HM_T_00086417	--	--	--
CAFS_HM_T_00065840	--	--	--
CAFS_HM_T_00084393	Magnesium-transporting ATPase (P-type)	P	Inorganic ion transport and metabolism ;
CAFS_HM_T_00062319	--	--	--
CAFS_HM_T_00030340	Magnesium-transporting ATPase (P-type)	P	Inorganic ion transport and metabolism ;
CAFS_HM_T_00043379	NADP-dependent 3-hydroxy acid dehydrogenase YdfG	C	Energy production and conversion ;
CAFS_HM_T_00079305	Magnesium-transporting ATPase (P-type)	P	Inorganic ion transport and metabolism ;
CAFS_HM_T_00071148	Magnesium-transporting ATPase (P-type)	P	Inorganic ion transport and metabolism ;
CAFS_HM_T_00053889	FoF1-type ATP synthase, beta subunit	C	Energy production and conversion ;
CAFS_HM_T_00054151	--	--	--
CAFS_HM_T_00010561	WD40 repeat	R	General function prediction only ;
CAFS_HM_T_00063456	--	--	--
CAFS_HM_T_00033881	Protein-arginine kinase	O	Posttranslational modification, protein turnover, chaperones ;
CAFS_HM_T_00057653	--	--	--
CAFS_HM_T_00079515	--	--	--
CAFS_HM_T_00052182	--	--	--
CAFS_HM_T_00068134	--	--	--
CAFS_HM_T_00059705	Archaeal/vacuolar-type H+-ATPase catalytic subunit A/Vma1	C	Energy production and conversion ;
CAFS_HM_T_00047699	Glucan phosphorylase	G	Carbohydrate transport and metabolism ;
CAFS_HM_T_00068886	Biotin carboxylase	I	Lipid transport and metabolism ;
CAFS_HM_T_00067933	Archaeal/vacuolar-type H+-ATPase catalytic subunit A/Vma1	C	Energy production and conversion ;
CAFS_HM_T_00018469	Chromosome segregation ATPase	D	Cell cycle control, cell division, chromosome partitioning ;
CAFS_HM_T_00090940	Prolyl-tRNA synthetase	J	Translation, ribosomal structure and biogenesis ;
CAFS_HM_T_00088194	Molecular chaperone DnaK (HSP70)	O	Posttranslational modification, protein turnover, chaperones ;
CAFS_HM_T_00079514	--	--	--
CAFS_HM_T_00073631	Actin-related protein	Z	Cytoskeleton ;
CAFS_HM_T_00056473	Enolase	G	Carbohydrate transport and metabolism ;
CAFS_HM_T_00004099	Dihydroorotase or related cyclic amidohydrolase	F	Nucleotide transport and metabolism ;
CAFS_HM_T_00091877	Glucan phosphorylase	G	Carbohydrate transport and metabolism ;
CAFS_HM_T_00000561	--	--	--
CAFS_HM_T_00002604	Uncharacterized membrane protein YhgE, phage infection protein (PIP) family	S	Function unknown ;
CAFS_HM_T_00029551	--	--	--
CAFS_HM_T_00058041	--	--	--
CAFS_HM_T_00075212	Glycogen debranching enzyme (alpha-1,6-glucosidase)	G	Carbohydrate transport and metabolism ;
CAFS_HM_T_00069897	--	--	--
CAFS_HM_T_00026484	Translation initiation factor IF-2, a GTPase	J	Translation, ribosomal structure and biogenesis ;
CAFS_HM_T_00066674	Predicted NTPase, NACHT family domain	T	Signal transduction mechanisms ;
CAFS_HM_T_00010536	Phosphoenolpyruvate synthase/pyruvate phosphate dikinase	G	Carbohydrate transport and metabolism ;
CAFS_HM_T_00051391	3-phosphoglycerate kinase	G	Carbohydrate transport and metabolism ;
CAFS_HM_T_00067028	--	--	--
CAFS_HM_T_00045771	--	--	--
CAFS_HM_T_00006824	--	--	--
CAFS_HM_T_00021966	--	--	--
CAFS_HM_T_00056689	--	--	--
CAFS_HM_T_00021076	Hexokinase	G	Carbohydrate transport and metabolism ;
CAFS_HM_T_00065957	ATP-dependent 26S proteasome regulatory subunit	O	Posttranslational modification, protein turnover, chaperones ;
CAFS_HM_T_00032924	Molecular chaperone, HSP90 family	O	Posttranslational modification, protein turnover, chaperones ;
CAFS_HM_T_00048923	Chromosome segregation ATPase	D	Cell cycle control, cell division, chromosome partitioning ;
CAFS_HM_T_00069903	Uncharacterized conserved protein YfaS, alpha-2-macroglobulin family	R	General function prediction only ;
CAFS_HM_T_00067579	Uncharacterized membrane protein YhgE, phage infection protein (PIP) family	S	Function unknown ;
CAFS_HM_T_00004114	Archaeal/vacuolar-type H+-ATPase subunit B/Vma2	C	Energy production and conversion ;
CAFS_HM_T_00082002	--	--	--
CAFS_HM_T_00056393	Uncharacterized surface anchored protein	S	Function unknown ;
CAFS_HM_T_00001368	--	--	--
CAFS_HM_T_00041092	--	--	--
CAFS_HM_T_00073543	--	--	--
CAFS_HM_T_00062741	Type V secretory pathway, adhesin AidA	MU	Cell wall/membrane/envelope biogenesis ; Intracellular trafficking, secretion, and vesicular transport ;
CAFS_HM_T_00043863	Aconitase A	C	Energy production and conversion ;
CAFS_HM_T_00075979	--	--	--
CAFS_HM_T_00067645	Magnesium-transporting ATPase (P-type)	P	Inorganic ion transport and metabolism ;
CAFS_HM_T_00015632	Citrate synthase	C	Energy production and conversion ;
CAFS_HM_T_00065215	Phage-related protein, tail component	X	Mobilome: prophages, transposons;
CAFS_HM_T_00051111	Dihydroorotase or related cyclic amidohydrolase	F	Nucleotide transport and metabolism ;
CAFS_HM_T_00057299	Ubiquitin	O	Posttranslational modification, protein turnover, chaperones ;
CAFS_HM_T_00071147	Magnesium-transporting ATPase (P-type)	P	Inorganic ion transport and metabolism ;
CAFS_HM_T_00081042	--	--	--
CAFS_HM_T_00017527	Enolase	G	Carbohydrate transport and metabolism ;
CAFS_HM_T_00084104	Chromosome segregation ATPase	D	Cell cycle control, cell division, chromosome partitioning ;
CAFS_HM_T_00087005	--	--	--
CAFS_HM_T_00015397	--	--	--
CAFS_HM_T_00069913	Uncharacterized conserved protein YfaS, alpha-2-macroglobulin family	R	General function prediction only ;
CAFS_HM_T_00076151	--	--	--
CAFS_HM_T_00013278	ATP-dependent 26S proteasome regulatory subunit	O	Posttranslational modification, protein turnover, chaperones ;
CAFS_HM_T_00058972	Transketolase	G	Carbohydrate transport and metabolism ;
CAFS_HM_T_00090042	--	--	--
CAFS_HM_T_00043022	--	--	--
CAFS_HM_T_00070234	Magnesium-transporting ATPase (P-type)	P	Inorganic ion transport and metabolism ;
CAFS_HM_T_00038448	Predicted NTPase, NACHT family domain	T	Signal transduction mechanisms ;
CAFS_HM_T_00086975	Carbon monoxide dehydrogenase subunit G	C	Energy production and conversion ;
CAFS_HM_T_00067593	--	--	--
CAFS_HM_T_00053565	Magnesium-transporting ATPase (P-type)	P	Inorganic ion transport and metabolism ;
CAFS_HM_T_00056411	--	--	--
CAFS_HM_T_00038503	Dihydroorotase or related cyclic amidohydrolase	F	Nucleotide transport and metabolism ;
CAFS_HM_T_00067332	--	--	--
CAFS_HM_T_00065858	--	--	--
CAFS_HM_T_00040120	--	--	--
CAFS_HM_T_00063233	Glucose-6-phosphate isomerase	G	Carbohydrate transport and metabolism ;
CAFS_HM_T_00052531	FoF1-type ATP synthase, alpha subunit	C	Energy production and conversion ;
CAFS_HM_T_00048524	--	--	--
CAFS_HM_T_00050340	Cell division protein FtsN	D	Cell cycle control, cell division, chromosome partitioning ;
CAFS_HM_T_00004622	Malate/lactate dehydrogenase	C	Energy production and conversion ;
CAFS_HM_T_00033529	--	--	--
CAFS_HM_T_00053188	--	--	--
CAFS_HM_T_00036291	--	--	--
CAFS_HM_T_00074324	6-phosphofructokinase	G	Carbohydrate transport and metabolism ;
CAFS_HM_T_00026478	--	--	--
CAFS_HM_T_00042609	Chromosome segregation ATPase	D	Cell cycle control, cell division, chromosome partitioning ;
CAFS_HM_T_00090276	Archaeal/vacuolar-type H+-ATPase subunit B/Vma2	C	Energy production and conversion ;
CAFS_HM_T_00028516	Enolase	G	Carbohydrate transport and metabolism ;
CAFS_HM_T_00068730	--	--	--
CAFS_HM_T_00060369	6-phosphofructokinase	G	Carbohydrate transport and metabolism ;
CAFS_HM_T_00040335	Glutathione synthase/RimK-type ligase, ATP-grasp superfamily	HJ	Coenzyme transport and metabolism ; Translation, ribosomal structure and biogenesis ;
CAFS_HM_T_00010012	Alanyl-tRNA synthetase	J	Translation, ribosomal structure and biogenesis ;
CAFS_HM_T_00020784	--	--	--
CAFS_HM_T_00058095	Outer membrane protein assembly factor BamB, contains PQQ-like beta-propeller repeat	M	Cell wall/membrane/envelope biogenesis ;
CAFS_HM_T_00053119	HD superfamily phosphodieaserase, includes HD domain of RNase Y	JR	Translation, ribosomal structure and biogenesis ; General function prediction only ;
CAFS_HM_T_00037540	Molecular chaperone DnaK (HSP70)	O	Posttranslational modification, protein turnover, chaperones ;
CAFS_HM_T_00064928	--	--	--
CAFS_HM_T_00066950	Acyl-CoA reductase or other NAD-dependent aldehyde dehydrogenase	C	Energy production and conversion ;
CAFS_HM_T_00016615	Chromosome segregation ATPase	D	Cell cycle control, cell division, chromosome partitioning ;
CAFS_HM_T_00028012	Translation elongation factor EF-1alpha (GTPase)	J	Translation, ribosomal structure and biogenesis ;
CAFS_HM_T_00054400	Magnesium-transporting ATPase (P-type)	P	Inorganic ion transport and metabolism ;
CAFS_HM_T_00018279	NADH dehydrogenase/NADH:ubiquinone oxidoreductase 75 kD subunit (chain G)	C	Energy production and conversion ;
CAFS_HM_T_00050332	NAD/NADP transhydrogenase alpha subunit	C	Energy production and conversion ;
CAFS_HM_T_00085804	--	--	--
CAFS_HM_T_00092395	Dihydroorotase or related cyclic amidohydrolase	F	Nucleotide transport and metabolism ;
CAFS_HM_T_00013725	4-aminobutyrate aminotransferase or related aminotransferase	E	Amino acid transport and metabolism ;
CAFS_HM_T_00090643	--	--	--
CAFS_HM_T_00017597	--	--	--
CAFS_HM_T_00071452	Dihydroorotase or related cyclic amidohydrolase	F	Nucleotide transport and metabolism ;
CAFS_HM_T_00038054	Magnesium-transporting ATPase (P-type)	P	Inorganic ion transport and metabolism ;
CAFS_HM_T_00017862	--	--	--
CAFS_HM_T_00013519	--	--	--
CAFS_HM_T_00057900	Magnesium-transporting ATPase (P-type)	P	Inorganic ion transport and metabolism ;
CAFS_HM_T_00050160	Sugar lactone lactonase YvrE	G	Carbohydrate transport and metabolism ;
CAFS_HM_T_00004402	--	--	--
CAFS_HM_T_00052088	Magnesium-transporting ATPase (P-type)	P	Inorganic ion transport and metabolism ;
CAFS_HM_T_00009810	Isocitrate dehydrogenase	C	Energy production and conversion ;
CAFS_HM_T_00034064	--	--	--
CAFS_HM_T_00057224	--	--	--
CAFS_HM_T_00050961	Predicted ATPase	R	General function prediction only ;
CAFS_HM_T_00026431	--	--	--
CAFS_HM_T_00066554	Predicted NTPase, NACHT family domain	T	Signal transduction mechanisms ;
CAFS_HM_T_00031049	Molecular chaperone, HSP90 family	O	Posttranslational modification, protein turnover, chaperones ;
CAFS_HM_T_00037723	Acyl-CoA reductase or other NAD-dependent aldehyde dehydrogenase	C	Energy production and conversion ;
CAFS_HM_T_00039192	2-oxoglutarate dehydrogenase complex, dehydrogenase (E1) component, and related enzymes	C	Energy production and conversion ;
CAFS_HM_T_00046845	--	--	--
CAFS_HM_T_00063619	Protein-arginine kinase	O	Posttranslational modification, protein turnover, chaperones ;
CAFS_HM_T_00001282	Magnesium-transporting ATPase (P-type)	P	Inorganic ion transport and metabolism ;
CAFS_HM_T_00088059	Fructose-bisphosphate aldolase class 1	G	Carbohydrate transport and metabolism ;
CAFS_HM_T_00088555	--	--	--
CAFS_HM_T_00080372	--	--	--
CAFS_HM_T_00022687	Translation elongation factor EF-1alpha (GTPase)	J	Translation, ribosomal structure and biogenesis ;
CAFS_HM_T_00090889	3-hydroxyacyl-CoA dehydrogenase	I	Lipid transport and metabolism ;
CAFS_HM_T_00020271	--	--	--
CAFS_HM_T_00053808	Aminopeptidase N	E	Amino acid transport and metabolism ;
CAFS_HM_T_00082667	Acyl-CoA reductase or other NAD-dependent aldehyde dehydrogenase	C	Energy production and conversion ;
CAFS_HM_T_00050289	Chromosome segregation ATPase	D	Cell cycle control, cell division, chromosome partitioning ;
CAFS_HM_T_00038735	Replicative superfamily II helicase	L	Replication, recombination and repair ;
CAFS_HM_T_00035823	--	--	--
CAFS_HM_T_00038791	--	--	--
CAFS_HM_T_00065374	Predicted NTPase, NACHT family domain	T	Signal transduction mechanisms ;
CAFS_HM_T_00078073	--	--	--
CAFS_HM_T_00025682	Chaperonin GroEL (HSP60 family)	O	Posttranslational modification, protein turnover, chaperones ;
CAFS_HM_T_00027947	--	--	--
CAFS_HM_T_00092212	Molecular chaperone DnaK (HSP70)	O	Posttranslational modification, protein turnover, chaperones ;
CAFS_HM_T_00088307	Uncharacterized conserved protein YfaS, alpha-2-macroglobulin family	R	General function prediction only ;
CAFS_HM_T_00047330	--	--	--
CAFS_HM_T_00023091	--	--	--
CAFS_HM_T_00049374	Chaperonin GroEL (HSP60 family)	O	Posttranslational modification, protein turnover, chaperones ;
CAFS_HM_T_00024495	Magnesium-transporting ATPase (P-type)	P	Inorganic ion transport and metabolism ;
CAFS_HM_T_00045148	--	--	--
CAFS_HM_T_00018962	--	--	--
CAFS_HM_T_00045900	Chaperonin GroEL (HSP60 family)	O	Posttranslational modification, protein turnover, chaperones ;
CAFS_HM_T_00035230	Predicted NTPase, NACHT family domain	T	Signal transduction mechanisms ;
CAFS_HM_T_00016782	--	--	--
CAFS_HM_T_00030986	--	--	--
CAFS_HM_T_00061163	Chaperonin GroEL (HSP60 family)	O	Posttranslational modification, protein turnover, chaperones ;
CAFS_HM_T_00080493	--	--	--
CAFS_HM_T_00040871	ABC-type amino acid transport/signal transduction system, periplasmic component/domain	ET	Amino acid transport and metabolism ; Signal transduction mechanisms ;
CAFS_HM_T_00027926	--	--	--
CAFS_HM_T_00061384	--	--	--
CAFS_HM_T_00015583	--	--	--
CAFS_HM_T_00078434	Phosphoglycerate dehydrogenase or related dehydrogenase	HR	Coenzyme transport and metabolism ; General function prediction only ;
CAFS_HM_T_00063535	Pyruvate/2-oxoglutarate dehydrogenase complex, dihydrolipoamide dehydrogenase (E3) component or related enzyme	C	Energy production and conversion ;
CAFS_HM_T_00084314	Triosephosphate isomerase	G	Carbohydrate transport and metabolism ;
CAFS_HM_T_00069911	Uncharacterized conserved protein YfaS, alpha-2-macroglobulin family	R	General function prediction only ;
CAFS_HM_T_00022238	Aspartate/tyrosine/aromatic aminotransferase	E	Amino acid transport and metabolism ;
CAFS_HM_T_00090319	Isoleucyl-tRNA synthetase	J	Translation, ribosomal structure and biogenesis ;
CAFS_HM_T_00085296	Glyceraldehyde-3-phosphate dehydrogenase/erythrose-4-phosphate dehydrogenase	G	Carbohydrate transport and metabolism ;
CAFS_HM_T_00021153	Tetratricopeptide (TPR) repeat	R	General function prediction only ;
CAFS_HM_T_00019248	--	--	--
CAFS_HM_T_00013914	NADPH:quinone reductase or related Zn-dependent oxidoreductase	CR	Energy production and conversion ; General function prediction only ;
CAFS_HM_T_00007376	Chaperonin GroEL (HSP60 family)	O	Posttranslational modification, protein turnover, chaperones ;
CAFS_HM_T_00073250	Acetyl/propionyl-CoA carboxylase, alpha subunit	I	Lipid transport and metabolism ;
CAFS_HM_T_00062281	--	--	--
CAFS_HM_T_00023205	Protein-arginine kinase	O	Posttranslational modification, protein turnover, chaperones ;
CAFS_HM_T_00043112	Fumarate hydratase class II	C	Energy production and conversion ;
CAFS_HM_T_00044195	Predicted Zn-dependent peptidase	R	General function prediction only ;
CAFS_HM_T_00075602	--	--	--
CAFS_HM_T_00008033	--	--	--
CAFS_HM_T_00058936	--	--	--
CAFS_HM_T_00005387	--	--	--
CAFS_HM_T_00063958	Actin-related protein	Z	Cytoskeleton ;
CAFS_HM_T_00078997	Isocitrate dehydrogenase	C	Energy production and conversion ;
CAFS_HM_T_00071290	--	--	--
CAFS_HM_T_00051134	Molecular chaperone DnaK (HSP70)	O	Posttranslational modification, protein turnover, chaperones ;
CAFS_HM_T_00044925	--	--	--
CAFS_HM_T_00088295	Uncharacterized conserved protein YfaS, alpha-2-macroglobulin family	R	General function prediction only ;
CAFS_HM_T_00043005	--	--	--
CAFS_HM_T_00019920	Amino acid transporter	E	Amino acid transport and metabolism ;
CAFS_HM_T_00069365	Molecular chaperone DnaK (HSP70)	O	Posttranslational modification, protein turnover, chaperones ;
CAFS_HM_T_00051077	--	--	--
CAFS_HM_T_00078356	6-phosphofructokinase	G	Carbohydrate transport and metabolism ;
CAFS_HM_T_00018366	Succinyl-CoA synthetase, beta subunit	C	Energy production and conversion ;
CAFS_HM_T_00017743	dsDNA-specific endonuclease/ATPase MutS2	L	Replication, recombination and repair ;
CAFS_HM_T_00020610	--	--	--
CAFS_HM_T_00031328	--	--	--
CAFS_HM_T_00040130	--	--	--
CAFS_HM_T_00087268	Leucine-rich repeat (LRR) protein	K	Transcription ;
CAFS_HM_T_00056880	Glutathione synthase/RimK-type ligase, ATP-grasp superfamily	HJ	Coenzyme transport and metabolism ; Translation, ribosomal structure and biogenesis ;
CAFS_HM_T_00048208	Aspartate/tyrosine/aromatic aminotransferase	E	Amino acid transport and metabolism ;
CAFS_HM_T_00069909	Uncharacterized conserved protein YfaS, alpha-2-macroglobulin family	R	General function prediction only ;
CAFS_HM_T_00016137	Leucyl aminopeptidase	E	Amino acid transport and metabolism ;
CAFS_HM_T_00070051	Chaperonin GroEL (HSP60 family)	O	Posttranslational modification, protein turnover, chaperones ;
CAFS_HM_T_00026989	--	--	--
CAFS_HM_T_00043160	Dihydroorotase or related cyclic amidohydrolase	F	Nucleotide transport and metabolism ;
CAFS_HM_T_00008957	--	--	--
CAFS_HM_T_00040194	Uncharacterized conserved protein YjdB, contains Ig-like domain	R	General function prediction only ;
CAFS_HM_T_00023239	--	--	--
CAFS_HM_T_00008334	Pyruvate/2-oxoglutarate/acetoin dehydrogenase complex, dehydrogenase (E1) component	C	Energy production and conversion ;
CAFS_HM_T_00040139	Acetyl-CoA acetyltransferase	I	Lipid transport and metabolism ;
CAFS_HM_T_00054471	6-phosphofructokinase	G	Carbohydrate transport and metabolism ;
CAFS_HM_T_00018993	Tetratricopeptide (TPR) repeat	R	General function prediction only ;
CAFS_HM_T_00037464	--	--	--
CAFS_HM_T_00019121	Phosphoglucomutase	G	Carbohydrate transport and metabolism ;
CAFS_HM_T_00046525	Aconitase A	C	Energy production and conversion ;
CAFS_HM_T_00022789	Actin-related protein	Z	Cytoskeleton ;
CAFS_HM_T_00041509	--	--	--
CAFS_HM_T_00061073	Glycyl-tRNA synthetase (class II)	J	Translation, ribosomal structure and biogenesis ;
CAFS_HM_T_00088449	--	--	--
CAFS_HM_T_00090971	--	--	--
CAFS_HM_T_00047991	Uncharacterized membrane protein YhgE, phage infection protein (PIP) family	S	Function unknown ;
CAFS_HM_T_00054411	Isoleucyl-tRNA synthetase	J	Translation, ribosomal structure and biogenesis ;
CAFS_HM_T_00068438	Acetyl-CoA carboxylase, carboxyltransferase component	I	Lipid transport and metabolism ;
CAFS_HM_T_00024966	Dihydroorotase or related cyclic amidohydrolase	F	Nucleotide transport and metabolism ;
CAFS_HM_T_00049415	Serine/threonine protein kinase	T	Signal transduction mechanisms ;
CAFS_HM_T_00071979	Uncharacterized conserved protein YfaS, alpha-2-macroglobulin family	R	General function prediction only ;
CAFS_HM_T_00030402	Succinate dehydrogenase/fumarate reductase, flavoprotein subunit	C	Energy production and conversion ;
CAFS_HM_T_00086550	Predicted NTPase, NACHT family domain	T	Signal transduction mechanisms ;
CAFS_HM_T_00051644	Glucan phosphorylase	G	Carbohydrate transport and metabolism ;
CAFS_HM_T_00017958	--	--	--
CAFS_HM_T_00017092	--	--	--
CAFS_HM_T_00039858	Magnesium-transporting ATPase (P-type)	P	Inorganic ion transport and metabolism ;
CAFS_HM_T_00068065	--	--	--
CAFS_HM_T_00064188	--	--	--
CAFS_HM_T_00062493	--	--	--
CAFS_HM_T_00060269	Glutamate or tyrosine decarboxylase or a related PLP-dependent protein	E	Amino acid transport and metabolism ;
CAFS_HM_T_00031519	Carbamoylphosphate synthase small subunit	EF	Amino acid transport and metabolism ; Nucleotide transport and metabolism ;
CAFS_HM_T_00058446	Chaperonin GroEL (HSP60 family)	O	Posttranslational modification, protein turnover, chaperones ;
CAFS_HM_T_00025415	Molecular chaperone, HSP90 family	O	Posttranslational modification, protein turnover, chaperones ;
CAFS_HM_T_00081146	--	--	--
CAFS_HM_T_00075861	Predicted NTPase, NACHT family domain	T	Signal transduction mechanisms ;
CAFS_HM_T_00073215	Translation elongation factor EF-1alpha (GTPase)	J	Translation, ribosomal structure and biogenesis ;
CAFS_HM_T_00005452	--	--	--
CAFS_HM_T_00001942	Na+/H+-dicarboxylate symporter	C	Energy production and conversion ;
CAFS_HM_T_00046103	NADH:ubiquinone oxidoreductase 49 kD subunit (chain D)	C	Energy production and conversion ;
CAFS_HM_T_00004827	Acetyl-CoA acetyltransferase	I	Lipid transport and metabolism ;
CAFS_HM_T_00058541	--	--	--
CAFS_HM_T_00068473	--	--	--
CAFS_HM_T_00090285	Molecular chaperone DnaK (HSP70)	O	Posttranslational modification, protein turnover, chaperones ;
CAFS_HM_T_00033005	3-hydroxyacyl-CoA dehydrogenase	I	Lipid transport and metabolism ;
CAFS_HM_T_00070004	Phosphoglycerate mutase (BPG-dependent)	G	Carbohydrate transport and metabolism ;
CAFS_HM_T_00051204	Leucyl-tRNA synthetase	J	Translation, ribosomal structure and biogenesis ;
CAFS_HM_T_00014583	--	--	--
CAFS_HM_T_00082983	Chaperonin GroEL (HSP60 family)	O	Posttranslational modification, protein turnover, chaperones ;
CAFS_HM_T_00041710	Serine/threonine protein kinase	T	Signal transduction mechanisms ;
CAFS_HM_T_00005877	Ribulose-5-phosphate 4-epimerase/Fuculose-1-phosphate aldolase	G	Carbohydrate transport and metabolism ;
CAFS_HM_T_00020216	--	--	--
CAFS_HM_T_00084406	Valyl-tRNA synthetase	J	Translation, ribosomal structure and biogenesis ;
CAFS_HM_T_00073708	--	--	--
CAFS_HM_T_00035874	--	--	--
CAFS_HM_T_00062527	Pimeloyl-ACP methyl ester carboxylesterase	HR	Coenzyme transport and metabolism ; General function prediction only ;
CAFS_HM_T_00017684	Outer membrane protein assembly factor BamB, contains PQQ-like beta-propeller repeat	M	Cell wall/membrane/envelope biogenesis ;
CAFS_HM_T_00030291	--	--	--
CAFS_HM_T_00037368	--	--	--
CAFS_HM_T_00023031	16S rRNA U516 pseudouridylate synthase RsuA and related 23S rRNA U2605, pseudouridylate synthases	J	Translation, ribosomal structure and biogenesis ;
CAFS_HM_T_00091403	--	--	--
CAFS_HM_T_00012722	--	--	--
CAFS_HM_T_00077112	--	--	--
CAFS_HM_T_00027074	Acyl-CoA reductase or other NAD-dependent aldehyde dehydrogenase	C	Energy production and conversion ;
CAFS_HM_T_00086964	Nitrous oxidase accessory protein NosD, contains tandem CASH domains	P	Inorganic ion transport and metabolism ;
CAFS_HM_T_00003217	2-oxoglutarate dehydrogenase complex, dehydrogenase (E1) component, and related enzymes	C	Energy production and conversion ;
CAFS_HM_T_00060176	Archaeal/vacuolar-type H+-ATPase subunit I/STV1	C	Energy production and conversion ;
CAFS_HM_T_00060246	--	--	--
CAFS_HM_T_00087431	Molecular chaperone DnaK (HSP70)	O	Posttranslational modification, protein turnover, chaperones ;
CAFS_HM_T_00076524	Zn-dependent peptidase, M16 (insulinase) family	O	Posttranslational modification, protein turnover, chaperones ;
CAFS_HM_T_00005819	Glutaminase	E	Amino acid transport and metabolism ;
CAFS_HM_T_00039442	WD40 repeat	R	General function prediction only ;
CAFS_HM_T_00089108	--	--	--
CAFS_HM_T_00029945	RNA recognition motif (RRM) domain	J	Translation, ribosomal structure and biogenesis ;
CAFS_HM_T_00052702	Ribulose-5-phosphate 4-epimerase/Fuculose-1-phosphate aldolase	G	Carbohydrate transport and metabolism ;
CAFS_HM_T_00031810	Acetyl-CoA acetyltransferase	I	Lipid transport and metabolism ;
CAFS_HM_T_00054153	--	--	--
CAFS_HM_T_00054669	Acyl-CoA reductase or other NAD-dependent aldehyde dehydrogenase	C	Energy production and conversion ;
CAFS_HM_T_00026406	DNA-binding beta-propeller fold protein YncE	R	General function prediction only ;
CAFS_HM_T_00026326	--	--	--
CAFS_HM_T_00051701	Pyruvate carboxylase	C	Energy production and conversion ;
CAFS_HM_T_00047396	--	--	--
CAFS_HM_T_00004557	dsDNA-specific endonuclease/ATPase MutS2	L	Replication, recombination and repair ;
CAFS_HM_T_00056703	Phage-related protein, tail component	X	Mobilome: prophages, transposons;
CAFS_HM_T_00053449	Acyl-CoA dehydrogenase related to the alkylation response protein AidB	I	Lipid transport and metabolism ;
CAFS_HM_T_00088163	PKD repeat	S	Function unknown ;
CAFS_HM_T_00013630	--	--	--
CAFS_HM_T_00073577	--	--	--
CAFS_HM_T_00073195	--	--	--
CAFS_HM_T_00092258	Acyl-CoA reductase or other NAD-dependent aldehyde dehydrogenase	C	Energy production and conversion ;
CAFS_HM_T_00014742	Translation elongation factor EF-Tu, a GTPase	J	Translation, ribosomal structure and biogenesis ;
CAFS_HM_T_00076966	Aspartate/methionine/tyrosine aminotransferase	E	Amino acid transport and metabolism ;
CAFS_HM_T_00037605	Predicted O-linked N-acetylglucosamine transferase, SPINDLY family	O	Posttranslational modification, protein turnover, chaperones ;
CAFS_HM_T_00003170	Serine/threonine protein kinase	T	Signal transduction mechanisms ;
CAFS_HM_T_00036929	--	--	--
CAFS_HM_T_00073822	Serine/threonine protein kinase	T	Signal transduction mechanisms ;
CAFS_HM_T_00055326	PKD repeat	S	Function unknown ;
CAFS_HM_T_00050564	--	--	--
CAFS_HM_T_00019858	WD40 repeat	R	General function prediction only ;
CAFS_HM_T_00030286	Triosephosphate isomerase	G	Carbohydrate transport and metabolism ;
CAFS_HM_T_00043694	--	--	--
CAFS_HM_T_00062807	Catalase	P	Inorganic ion transport and metabolism ;
CAFS_HM_T_00029609	--	--	--
CAFS_HM_T_00042409	Citrate synthase	C	Energy production and conversion ;
CAFS_HM_T_00071620	--	--	--
CAFS_HM_T_00082092	Serine/threonine protein kinase	T	Signal transduction mechanisms ;
CAFS_HM_T_00026976	Archaeal/vacuolar-type H+-ATPase subunit E/Vma4	C	Energy production and conversion ;
CAFS_HM_T_00065611	Serine/threonine protein kinase	T	Signal transduction mechanisms ;
CAFS_HM_T_00016955	Negative regulator of GroEL, contains thioredoxin-like and TPR-like domains	O	Posttranslational modification, protein turnover, chaperones ;
CAFS_HM_T_00049606	Arginyl-tRNA synthetase	J	Translation, ribosomal structure and biogenesis ;
CAFS_HM_T_00051723	Peroxiredoxin	O	Posttranslational modification, protein turnover, chaperones ;
CAFS_HM_T_00007790	DNA repair ATPase RecN	L	Replication, recombination and repair ;
CAFS_HM_T_00084019	--	--	--
CAFS_HM_T_00061583	--	--	--
CAFS_HM_T_00061958	Malate/lactate dehydrogenase	C	Energy production and conversion ;
CAFS_HM_T_00036165	Large exoprotein involved in heme utilization or adhesion	U	Intracellular trafficking, secretion, and vesicular transport ;
CAFS_HM_T_00075145	Glutamine synthetase	E	Amino acid transport and metabolism ;
CAFS_HM_T_00082999	--	--	--
CAFS_HM_T_00068229	Serine/threonine protein kinase	T	Signal transduction mechanisms ;
CAFS_HM_T_00063080	Phage-related protein, tail component	X	Mobilome: prophages, transposons;
CAFS_HM_T_00092107	Cell division protein FtsN	D	Cell cycle control, cell division, chromosome partitioning ;
CAFS_HM_T_00046568	--	--	--
CAFS_HM_T_00041962	--	--	--
CAFS_HM_T_00084412	Cell division protein DamX, binds to the septal ring, contains C-terminal SPOR domain	D	Cell cycle control, cell division, chromosome partitioning ;
CAFS_HM_T_00025420	--	--	--
CAFS_HM_T_00076336	Translation elongation factor EF-G, a GTPase	J	Translation, ribosomal structure and biogenesis ;
CAFS_HM_T_00004692	ATP-, maltotriose- and DNA-dependent transcriptional regulator MalT	K	Transcription ;
CAFS_HM_T_00038250	N-acetylneuraminic acid mutarotase	M	Cell wall/membrane/envelope biogenesis ;
CAFS_HM_T_00009918	Aspartate/tyrosine/aromatic aminotransferase	E	Amino acid transport and metabolism ;
CAFS_HM_T_00025324	Aminopeptidase N	E	Amino acid transport and metabolism ;
CAFS_HM_T_00076176	Zn-dependent peptidase, M16 (insulinase) family	O	Posttranslational modification, protein turnover, chaperones ;
CAFS_HM_T_00089448	Ca2+-binding protein, EF-hand superfamily	T	Signal transduction mechanisms ;
CAFS_HM_T_00046608	Serine/threonine protein kinase	T	Signal transduction mechanisms ;
CAFS_HM_T_00063618	Negative regulator of GroEL, contains thioredoxin-like and TPR-like domains	O	Posttranslational modification, protein turnover, chaperones ;
CAFS_HM_T_00047131	Archaeal/vacuolar-type H+-ATPase subunit C/Vma6	C	Energy production and conversion ;
CAFS_HM_T_00089476	Lysophospholipase, alpha-beta hydrolase superfamily	I	Lipid transport and metabolism ;
CAFS_HM_T_00000528	--	--	--
CAFS_HM_T_00054371	--	--	--
CAFS_HM_T_00048160	--	--	--
CAFS_HM_T_00003676	--	--	--
CAFS_HM_T_00016920	Predicted Zn-dependent peptidase	R	General function prediction only ;
CAFS_HM_T_00013840	Translation elongation factor EF-G, a GTPase	J	Translation, ribosomal structure and biogenesis ;
CAFS_HM_T_00081013	--	--	--
CAFS_HM_T_00078662	Glutaminase	E	Amino acid transport and metabolism ;
CAFS_HM_T_00030719	--	--	--
CAFS_HM_T_00057687	Seryl-tRNA synthetase	J	Translation, ribosomal structure and biogenesis ;
CAFS_HM_T_00031224	Prolyl oligopeptidase PreP, S9A serine peptidase family	E	Amino acid transport and metabolism ;
CAFS_HM_T_00077687	Carbonic anhydrase	P	Inorganic ion transport and metabolism ;
CAFS_HM_T_00034703	Molecular chaperone DnaK (HSP70)	O	Posttranslational modification, protein turnover, chaperones ;
CAFS_HM_T_00059356	Aspartyl/asparaginyl-tRNA synthetase	J	Translation, ribosomal structure and biogenesis ;
CAFS_HM_T_00075365	--	--	--
CAFS_HM_T_00040628	--	--	--
CAFS_HM_T_00075768	Phage-related protein, tail component	X	Mobilome: prophages, transposons;
CAFS_HM_T_00030642	Acetylornithine deacetylase/Succinyl-diaminopimelate desuccinylase or related deacylase	E	Amino acid transport and metabolism ;
CAFS_HM_T_00009913	Purine nucleoside phosphorylase	F	Nucleotide transport and metabolism ;
CAFS_HM_T_00074457	--	--	--
CAFS_HM_T_00040703	Amino acid transporter	E	Amino acid transport and metabolism ;
CAFS_HM_T_00067108	Malic enzyme	C	Energy production and conversion ;
CAFS_HM_T_00023363	--	--	--
CAFS_HM_T_00043643	Glutamate dehydrogenase/leucine dehydrogenase	E	Amino acid transport and metabolism ;
CAFS_HM_T_00066779	Chromosome segregation ATPase	D	Cell cycle control, cell division, chromosome partitioning ;
CAFS_HM_T_00045944	Diadenosine tetraphosphatase ApaH/serine/threonine protein phosphatase, PP2A family	T	Signal transduction mechanisms ;
CAFS_HM_T_00031096	--	--	--
CAFS_HM_T_00050362	--	--	--
CAFS_HM_T_00092469	--	--	--
CAFS_HM_T_00029674	--	--	--
CAFS_HM_T_00052684	Aspartyl/asparaginyl-tRNA synthetase	J	Translation, ribosomal structure and biogenesis ;
CAFS_HM_T_00015634	--	--	--
CAFS_HM_T_00091656	Uncharacterized conserved protein, related to short-chain dehydrogenases	S	Function unknown ;
CAFS_HM_T_00032050	--	--	--
CAFS_HM_T_00040325	Acyl CoA:acetate/3-ketoacid CoA transferase, beta subunit	I	Lipid transport and metabolism ;
CAFS_HM_T_00069136	--	--	--
CAFS_HM_T_00055287	Cysteine sulfinate desulfinase/cysteine desulfurase or related enzyme	E	Amino acid transport and metabolism ;
CAFS_HM_T_00085019	--	--	--
CAFS_HM_T_00038479	--	--	--
CAFS_HM_T_00073474	Lantibiotic modifying enzyme	V	Defense mechanisms ;
CAFS_HM_T_00006740	Acyl-CoA reductase or other NAD-dependent aldehyde dehydrogenase	C	Energy production and conversion ;
CAFS_HM_T_00028713	NADH:ubiquinone oxidoreductase, NADH-binding 51 kD subunit (chain F)	C	Energy production and conversion ;
CAFS_HM_T_00065410	Superfamily II DNA and RNA helicase	L	Replication, recombination and repair ;
CAFS_HM_T_00028007	--	--	--
CAFS_HM_T_00040502	S-adenosylhomocysteine hydrolase	H	Coenzyme transport and metabolism ;
CAFS_HM_T_00027638	--	--	--
CAFS_HM_T_00013870	Uncharacterized membrane protein YqiK, contains Band7/PHB/SPFH domain	S	Function unknown ;
CAFS_HM_T_00079170	--	--	--
CAFS_HM_T_00024454	Malate/lactate dehydrogenase	C	Energy production and conversion ;
CAFS_HM_T_00032941	Molybdopterin biosynthesis enzyme	H	Coenzyme transport and metabolism ;
CAFS_HM_T_00045362	NADPH-dependent curcumin reductase CurA	QR	Secondary metabolites biosynthesis, transport and catabolism ; General function prediction only ;
CAFS_HM_T_00004550	Molecular chaperone DnaK (HSP70)	O	Posttranslational modification, protein turnover, chaperones ;
CAFS_HM_T_00048587	Pimeloyl-ACP methyl ester carboxylesterase	HR	Coenzyme transport and metabolism ; General function prediction only ;
CAFS_HM_T_00065427	TPP-dependent pyruvate or acetoin dehydrogenase subunit alpha	C	Energy production and conversion ;
CAFS_HM_T_00009409	--	--	--
CAFS_HM_T_00050183	Pyruvate/2-oxoglutarate dehydrogenase complex, dihydrolipoamide acyltransferase (E2) component	C	Energy production and conversion ;
CAFS_HM_T_00033386	--	--	--
CAFS_HM_T_00062164	Saccharopine dehydrogenase, NADP-dependent	E	Amino acid transport and metabolism ;
CAFS_HM_T_00008768	Chromosome segregation ATPase	D	Cell cycle control, cell division, chromosome partitioning ;
CAFS_HM_T_00006841	DNA-binding beta-propeller fold protein YncE	R	General function prediction only ;
CAFS_HM_T_00082455	--	--	--
CAFS_HM_T_00023283	--	--	--
CAFS_HM_T_00040530	--	--	--
CAFS_HM_T_00003584	RNA recognition motif (RRM) domain	J	Translation, ribosomal structure and biogenesis ;
CAFS_HM_T_00035633	Alpha-glucosidase, glycosyl hydrolase family GH31	G	Carbohydrate transport and metabolism ;
CAFS_HM_T_00048841	--	--	--
CAFS_HM_T_00051706	Pyruvate carboxylase	C	Energy production and conversion ;
CAFS_HM_T_00013254	Predicted ATPase, archaeal AAA+ ATPase superfamily	R	General function prediction only ;
CAFS_HM_T_00048411	Acyl-CoA dehydrogenase related to the alkylation response protein AidB	I	Lipid transport and metabolism ;
CAFS_HM_T_00064381	Mannose-6-phosphate isomerase, class I	G	Carbohydrate transport and metabolism ;
CAFS_HM_T_00054805	--	--	--
CAFS_HM_T_00070772	--	--	--
CAFS_HM_T_00047028	ATP-dependent 26S proteasome regulatory subunit	O	Posttranslational modification, protein turnover, chaperones ;
CAFS_HM_T_00085450	--	--	--
CAFS_HM_T_00017823	S-adenosylhomocysteine hydrolase	H	Coenzyme transport and metabolism ;
CAFS_HM_T_00066061	Threonyl-tRNA synthetase	J	Translation, ribosomal structure and biogenesis ;
CAFS_HM_T_00076582	--	--	--
CAFS_HM_T_00062089	Long-chain acyl-CoA synthetase (AMP-forming)	I	Lipid transport and metabolism ;
CAFS_HM_T_00051346	--	--	--
CAFS_HM_T_00071356	--	--	--
CAFS_HM_T_00039323	Glucosamine 6-phosphate synthetase, contains amidotransferase and phosphosugar isomerase domains	M	Cell wall/membrane/envelope biogenesis ;
CAFS_HM_T_00076467	--	--	--
CAFS_HM_T_00006719	ABC-type Zn2+ transport system, periplasmic component/surface adhesin	P	Inorganic ion transport and metabolism ;
CAFS_HM_T_00078136	--	--	--
CAFS_HM_T_00006701	Multicopper oxidase with three cupredoxin domains (includes cell division protein FtsP and spore coat protein CotA)	DPM	Cell cycle control, cell division, chromosome partitioning ; Inorganic ion transport and metabolism ; Cell wall/membrane/envelope biogenesis ;
CAFS_HM_T_00090227	UDP-N-acetylglucosamine pyrophosphorylase	G	Carbohydrate transport and metabolism ;
CAFS_HM_T_00064354	--	--	--
CAFS_HM_T_00065550	NADPH-dependent 2,4-dienoyl-CoA reductase, sulfur reductase, or a related oxidoreductase	I	Lipid transport and metabolism ;
CAFS_HM_T_00066011	--	--	--
CAFS_HM_T_00024547	Aldo/keto reductase, related to diketogulonate reductase	Q	Secondary metabolites biosynthesis, transport and catabolism ;
CAFS_HM_T_00034007	Phosphoribosylaminoimidazole-succinocarboxamide synthase	F	Nucleotide transport and metabolism ;
CAFS_HM_T_00083490	Acetylornithine deacetylase/Succinyl-diaminopimelate desuccinylase or related deacylase	E	Amino acid transport and metabolism ;
CAFS_HM_T_00008821	Predicted ATPase, AAA+ superfamily	R	General function prediction only ;
CAFS_HM_T_00054211	--	--	--
CAFS_HM_T_00022906	PASTA domain, binds beta-lactams	M	Cell wall/membrane/envelope biogenesis ;
CAFS_HM_T_00015036	--	--	--
CAFS_HM_T_00001863	Uncharacterized conserved protein YfaS, alpha-2-macroglobulin family	R	General function prediction only ;
CAFS_HM_T_00022076	--	--	--
CAFS_HM_T_00088739	Ca2+-binding protein, EF-hand superfamily	T	Signal transduction mechanisms ;
CAFS_HM_T_00016847	Pyruvate/2-oxoglutarate dehydrogenase complex, dihydrolipoamide dehydrogenase (E3) component or related enzyme	C	Energy production and conversion ;
CAFS_HM_T_00039900	--	--	--
CAFS_HM_T_00026362	ATP-dependent 26S proteasome regulatory subunit	O	Posttranslational modification, protein turnover, chaperones ;
CAFS_HM_T_00074112	--	--	--
CAFS_HM_T_00064328	Forkhead associated (FHA) domain, binds pSer, pThr, pTyr	T	Signal transduction mechanisms ;
CAFS_HM_T_00020008	--	--	--
CAFS_HM_T_00033691	--	--	--
CAFS_HM_T_00064025	--	--	--
CAFS_HM_T_00083277	--	--	--
CAFS_HM_T_00017438	--	--	--
CAFS_HM_T_00042759	Fructose-bisphosphate aldolase class 1	G	Carbohydrate transport and metabolism ;
CAFS_HM_T_00080171	--	--	--
CAFS_HM_T_00071018	--	--	--
CAFS_HM_T_00026966	S-adenosylhomocysteine hydrolase	H	Coenzyme transport and metabolism ;
CAFS_HM_T_00062314	--	--	--
CAFS_HM_T_00071862	--	--	--
CAFS_HM_T_00060545	--	--	--
CAFS_HM_T_00018749	Type V secretory pathway, adhesin AidA	MU	Cell wall/membrane/envelope biogenesis ; Intracellular trafficking, secretion, and vesicular transport ;
CAFS_HM_T_00057696	Citrate synthase	C	Energy production and conversion ;
CAFS_HM_T_00016898	Acyl-CoA reductase or other NAD-dependent aldehyde dehydrogenase	C	Energy production and conversion ;
CAFS_HM_T_00076832	--	--	--
CAFS_HM_T_00085793	--	--	--
CAFS_HM_T_00014875	--	--	--
CAFS_HM_T_00045250	Superfamily II DNA and RNA helicase	L	Replication, recombination and repair ;
CAFS_HM_T_00006831	3-hydroxy-3-methylglutaryl CoA synthase	I	Lipid transport and metabolism ;
CAFS_HM_T_00078205	--	--	--
CAFS_HM_T_00016252	--	--	--
CAFS_HM_T_00024851	Secreted trypsin-like serine protease	O	Posttranslational modification, protein turnover, chaperones ;
CAFS_HM_T_00032587	ATP-dependent 26S proteasome regulatory subunit	O	Posttranslational modification, protein turnover, chaperones ;
CAFS_HM_T_00091719	ATP-dependent 26S proteasome regulatory subunit	O	Posttranslational modification, protein turnover, chaperones ;
CAFS_HM_T_00063185	--	--	--
CAFS_HM_T_00063071	PKD repeat	S	Function unknown ;
CAFS_HM_T_00052005	--	--	--
CAFS_HM_T_00012421	Predicted Zn-dependent peptidase	R	General function prediction only ;
CAFS_HM_T_00018776	Acyl-CoA dehydrogenase related to the alkylation response protein AidB	I	Lipid transport and metabolism ;
CAFS_HM_T_00021115	--	--	--
CAFS_HM_T_00090516	--	--	--
CAFS_HM_T_00045124	Acyl-CoA reductase or other NAD-dependent aldehyde dehydrogenase	C	Energy production and conversion ;
CAFS_HM_T_00000544	Cell division protein DamX, binds to the septal ring, contains C-terminal SPOR domain	D	Cell cycle control, cell division, chromosome partitioning ;
CAFS_HM_T_00035464	Ferredoxin-like protein FixX	C	Energy production and conversion ;
CAFS_HM_T_00062038	Electron transfer flavoprotein, alpha subunit	C	Energy production and conversion ;
CAFS_HM_T_00010304	--	--	--
CAFS_HM_T_00018049	Methionyl-tRNA synthetase	J	Translation, ribosomal structure and biogenesis ;
CAFS_HM_T_00013460	Predicted RNA methylase	R	General function prediction only ;
CAFS_HM_T_00066681	tRNA Uridine 5-carbamoylmethylation protein Kti12 (Killer toxin insensitivity protein)	J	Translation, ribosomal structure and biogenesis ;
CAFS_HM_T_00076552	--	--	--
CAFS_HM_T_00010014	--	--	--
CAFS_HM_T_00009042	--	--	--
CAFS_HM_T_00001457	--	--	--
CAFS_HM_T_00068283	Uncharacterized protein, contains caspase domain	R	General function prediction only ;
CAFS_HM_T_00035656	Lactate dehydrogenase or related 2-hydroxyacid dehydrogenase	CHR	Energy production and conversion ; Coenzyme transport and metabolism ; General function prediction only ;
CAFS_HM_T_00069561	--	--	--
CAFS_HM_T_00021569	N-acetyl-beta-hexosaminidase	G	Carbohydrate transport and metabolism ;
CAFS_HM_T_00038216	Type V secretory pathway, adhesin AidA	MU	Cell wall/membrane/envelope biogenesis ; Intracellular trafficking, secretion, and vesicular transport ;
CAFS_HM_T_00004948	Actin-related protein	Z	Cytoskeleton ;
CAFS_HM_T_00079405	Aspartyl/asparaginyl-tRNA synthetase	J	Translation, ribosomal structure and biogenesis ;
CAFS_HM_T_00029688	Serine/threonine protein kinase	T	Signal transduction mechanisms ;
CAFS_HM_T_00061833	WD40 repeat	R	General function prediction only ;
CAFS_HM_T_00031348	Methylmalonyl-CoA mutase, C-terminal domain/subunit (cobalamin-binding)	I	Lipid transport and metabolism ;
CAFS_HM_T_00041145	Choline dehydrogenase or related flavoprotein	IR	Lipid transport and metabolism ; General function prediction only ;
CAFS_HM_T_00072531	NAD(P)-dependent dehydrogenase, short-chain alcohol dehydrogenase family	IQR	Lipid transport and metabolism ; Secondary metabolites biosynthesis, transport and catabolism ; General function prediction only ;
CAFS_HM_T_00066604	--	--	--
CAFS_HM_T_00067316	Serine/threonine protein kinase	T	Signal transduction mechanisms ;
CAFS_HM_T_00017811	Leucyl aminopeptidase	E	Amino acid transport and metabolism ;
CAFS_HM_T_00033362	Ca2+-binding protein, EF-hand superfamily	T	Signal transduction mechanisms ;
CAFS_HM_T_00054075	Glucose/arabinose dehydrogenase, beta-propeller fold	G	Carbohydrate transport and metabolism ;
CAFS_HM_T_00011903	FKBP-type peptidyl-prolyl cis-trans isomerase	O	Posttranslational modification, protein turnover, chaperones ;
CAFS_HM_T_00031229	Acetyl-CoA acetyltransferase	I	Lipid transport and metabolism ;
CAFS_HM_T_00073050	Serine/threonine protein kinase	T	Signal transduction mechanisms ;
CAFS_HM_T_00078102	WD40 repeat	R	General function prediction only ;
CAFS_HM_T_00032556	Alkyl hydroperoxide reductase subunit AhpC (peroxiredoxin)	V	Defense mechanisms ;
CAFS_HM_T_00033281	Replication fork clamp-binding protein CrfC (dynamin-like GTPase family)	L	Replication, recombination and repair ;
CAFS_HM_T_00085854	--	--	--
CAFS_HM_T_00058881	Translation elongation factor EF-1alpha (GTPase)	J	Translation, ribosomal structure and biogenesis ;
CAFS_HM_T_00077598	Acetyl-CoA carboxylase, carboxyltransferase component	I	Lipid transport and metabolism ;
CAFS_HM_T_00039353	Long-chain acyl-CoA synthetase (AMP-forming)	I	Lipid transport and metabolism ;
CAFS_HM_T_00008540	RNA recognition motif (RRM) domain	J	Translation, ribosomal structure and biogenesis ;
CAFS_HM_T_00069191	Phosphoserine aminotransferase	HE	Coenzyme transport and metabolism ; Amino acid transport and metabolism ;
CAFS_HM_T_00046263	Tfp pilus assembly protein PilF	NW	Cell motility ; Extracellular structures ;
CAFS_HM_T_00008975	Protein tyrosine phosphatase	T	Signal transduction mechanisms ;
CAFS_HM_T_00018586	Glutamate or tyrosine decarboxylase or a related PLP-dependent protein	E	Amino acid transport and metabolism ;
CAFS_HM_T_00000705	Predicted ATPase	R	General function prediction only ;
CAFS_HM_T_00053251	Autotransporter adhesin	UW	Intracellular trafficking, secretion, and vesicular transport ; Extracellular structures ;
CAFS_HM_T_00049353	Diadenosine tetraphosphatase ApaH/serine/threonine protein phosphatase, PP2A family	T	Signal transduction mechanisms ;
CAFS_HM_T_00001240	Xanthine dehydrogenase, molybdopterin-binding subunit B	F	Nucleotide transport and metabolism ;
CAFS_HM_T_00059797	--	--	--
CAFS_HM_T_00073537	AICAR transformylase/IMP cyclohydrolase PurH	F	Nucleotide transport and metabolism ;
CAFS_HM_T_00022594	2-oxoglutarate dehydrogenase complex, dehydrogenase (E1) component, and related enzymes	C	Energy production and conversion ;
CAFS_HM_T_00041384	--	--	--
CAFS_HM_T_00042530	ATP-dependent 26S proteasome regulatory subunit	O	Posttranslational modification, protein turnover, chaperones ;
CAFS_HM_T_00050263	NAD(P)-dependent dehydrogenase, short-chain alcohol dehydrogenase family	IQR	Lipid transport and metabolism ; Secondary metabolites biosynthesis, transport and catabolism ; General function prediction only ;
CAFS_HM_T_00034209	Diadenosine tetraphosphatase ApaH/serine/threonine protein phosphatase, PP2A family	T	Signal transduction mechanisms ;
CAFS_HM_T_00009206	Leucine-rich repeat (LRR) protein	K	Transcription ;
CAFS_HM_T_00007894	PASTA domain, binds beta-lactams	M	Cell wall/membrane/envelope biogenesis ;
CAFS_HM_T_00062847	--	--	--
CAFS_HM_T_00089103	--	--	--
CAFS_HM_T_00056370	--	--	--
CAFS_HM_T_00003342	--	--	--
CAFS_HM_T_00071811	--	--	--
CAFS_HM_T_00037200	ABC-type amino acid transport/signal transduction system, periplasmic component/domain	ET	Amino acid transport and metabolism ; Signal transduction mechanisms ;
CAFS_HM_T_00069616	Ubiquitin	O	Posttranslational modification, protein turnover, chaperones ;
CAFS_HM_T_00013787	Serine/threonine protein kinase	T	Signal transduction mechanisms ;
CAFS_HM_T_00063632	--	--	--
CAFS_HM_T_00091900	Diadenosine tetraphosphatase ApaH/serine/threonine protein phosphatase, PP2A family	T	Signal transduction mechanisms ;
CAFS_HM_T_00062028	NADPH-dependent 2,4-dienoyl-CoA reductase, sulfur reductase, or a related oxidoreductase	I	Lipid transport and metabolism ;
CAFS_HM_T_00085942	--	--	--
CAFS_HM_T_00044595	--	--	--
CAFS_HM_T_00011576	Carboxylesterase type B	I	Lipid transport and metabolism ;
CAFS_HM_T_00030353	--	--	--
CAFS_HM_T_00090923	--	--	--
CAFS_HM_T_00018125	Superfamily II DNA and RNA helicase	L	Replication, recombination and repair ;
CAFS_HM_T_00024296	Endonuclease YncB, thermonuclease family	L	Replication, recombination and repair ;
CAFS_HM_T_00088094	Chromosome segregation ATPase	D	Cell cycle control, cell division, chromosome partitioning ;
CAFS_HM_T_00016435	--	--	--
CAFS_HM_T_00060769	--	--	--
CAFS_HM_T_00071994	Uncharacterized conserved protein YfaS, alpha-2-macroglobulin family	R	General function prediction only ;
CAFS_HM_T_00028934	--	--	--
CAFS_HM_T_00058021	Glucose/arabinose dehydrogenase, beta-propeller fold	G	Carbohydrate transport and metabolism ;
CAFS_HM_T_00016432	Glycerol-3-phosphate dehydrogenase	C	Energy production and conversion ;
CAFS_HM_T_00088644	--	--	--
CAFS_HM_T_00083247	--	--	--
CAFS_HM_T_00037959	--	--	--
CAFS_HM_T_00003570	--	--	--
CAFS_HM_T_00029392	Ca2+-binding protein, EF-hand superfamily	T	Signal transduction mechanisms ;
CAFS_HM_T_00081120	Malic enzyme	C	Energy production and conversion ;
CAFS_HM_T_00040451	--	--	--
CAFS_HM_T_00051687	--	--	--
CAFS_HM_T_00067549	--	--	--
CAFS_HM_T_00042104	ATP-dependent 26S proteasome regulatory subunit	O	Posttranslational modification, protein turnover, chaperones ;
CAFS_HM_T_00033486	Superfamily II DNA and RNA helicase	L	Replication, recombination and repair ;
CAFS_HM_T_00038520	GTP-binding protein EngB required for normal cell division	D	Cell cycle control, cell division, chromosome partitioning ;
CAFS_HM_T_00067055	--	--	--
CAFS_HM_T_00077286	--	--	--
CAFS_HM_T_00016133	Leucyl aminopeptidase	E	Amino acid transport and metabolism ;
CAFS_HM_T_00031409	Secreted trypsin-like serine protease	O	Posttranslational modification, protein turnover, chaperones ;
CAFS_HM_T_00068113	RNA recognition motif (RRM) domain	J	Translation, ribosomal structure and biogenesis ;
CAFS_HM_T_00068323	Translation elongation factor EF-G, a GTPase	J	Translation, ribosomal structure and biogenesis ;
CAFS_HM_T_00076702	--	--	--
CAFS_HM_T_00079193	FoF1-type ATP synthase, delta subunit	C	Energy production and conversion ;
CAFS_HM_T_00019072	--	--	--
CAFS_HM_T_00030006	Glutathione S-transferase	O	Posttranslational modification, protein turnover, chaperones ;
CAFS_HM_T_00088929	Phenylalanyl-tRNA synthetase beta subunit	J	Translation, ribosomal structure and biogenesis ;
CAFS_HM_T_00048488	GTPase SAR1 family domain	R	General function prediction only ;
CAFS_HM_T_00002728	Serine protease, subtilisin family	O	Posttranslational modification, protein turnover, chaperones ;
CAFS_HM_T_00012602	--	--	--
CAFS_HM_T_00070795	--	--	--
CAFS_HM_T_00011616	--	--	--
CAFS_HM_T_00077445	GTP-binding protein EngB required for normal cell division	D	Cell cycle control, cell division, chromosome partitioning ;
CAFS_HM_T_00079707	--	--	--
CAFS_HM_T_00057047	--	--	--
CAFS_HM_T_00053489	N-acetylneuraminic acid mutarotase	M	Cell wall/membrane/envelope biogenesis ;
CAFS_HM_T_00074253	--	--	--
CAFS_HM_T_00021265	Uncharacterized conserved protein YukE	S	Function unknown ;
CAFS_HM_T_00013580	Diadenosine tetraphosphatase ApaH/serine/threonine protein phosphatase, PP2A family	T	Signal transduction mechanisms ;
CAFS_HM_T_00036669	Glutathione S-transferase	O	Posttranslational modification, protein turnover, chaperones ;
CAFS_HM_T_00055394	--	--	--
CAFS_HM_T_00053124	Septal ring factor EnvC, activator of murein hydrolases AmiA and AmiB	D	Cell cycle control, cell division, chromosome partitioning ;
CAFS_HM_T_00076920	WD40 repeat	R	General function prediction only ;
CAFS_HM_T_00014524	Secreted trypsin-like serine protease	O	Posttranslational modification, protein turnover, chaperones ;
CAFS_HM_T_00052592	Uncharacterized protein, contains caspase domain	R	General function prediction only ;
CAFS_HM_T_00079203	--	--	--
CAFS_HM_T_00037681	--	--	--
CAFS_HM_T_00060445	DnaJ-class molecular chaperone with C-terminal Zn finger domain	O	Posttranslational modification, protein turnover, chaperones ;
CAFS_HM_T_00048395	Glycosidase	G	Carbohydrate transport and metabolism ;
CAFS_HM_T_00043102	Tfp pilus assembly protein FimV	NW	Cell motility ; Extracellular structures ;
CAFS_HM_T_00015689	Archaeal/vacuolar-type H+-ATPase subunit I/STV1	C	Energy production and conversion ;
CAFS_HM_T_00018609	Asp-tRNAAsn/Glu-tRNAGln amidotransferase A subunit or related amidase	J	Translation, ribosomal structure and biogenesis ;
CAFS_HM_T_00053158	20S proteasome, alpha and beta subunits	O	Posttranslational modification, protein turnover, chaperones ;
CAFS_HM_T_00009694	TPP-dependent pyruvate or acetoin dehydrogenase subunit alpha	C	Energy production and conversion ;
CAFS_HM_T_00033135	WGR domain, predicted DNA-binding domain in MolR	K	Transcription ;
CAFS_HM_T_00013167	GTPase SAR1 family domain	R	General function prediction only ;
CAFS_HM_T_00060870	Thioesterase domain of type I polyketide synthase or non-ribosomal peptide synthetase	Q	Secondary metabolites biosynthesis, transport and catabolism ;
CAFS_HM_T_00035662	Zn-dependent alcohol dehydrogenase	R	General function prediction only ;
CAFS_HM_T_00088699	--	--	--
CAFS_HM_T_00091029	Formyltetrahydrofolate synthetase	F	Nucleotide transport and metabolism ;
CAFS_HM_T_00029911	--	--	--
CAFS_HM_T_00079380	--	--	--
CAFS_HM_T_00085115	ATP-dependent 26S proteasome regulatory subunit	O	Posttranslational modification, protein turnover, chaperones ;
CAFS_HM_T_00018915	--	--	--
CAFS_HM_T_00063827	--	--	--
CAFS_HM_T_00090843	Molybdopterin biosynthesis enzyme	H	Coenzyme transport and metabolism ;
CAFS_HM_T_00072192	--	--	--
CAFS_HM_T_00019339	Thioesterase domain of type I polyketide synthase or non-ribosomal peptide synthetase	Q	Secondary metabolites biosynthesis, transport and catabolism ;
CAFS_HM_T_00075125	--	--	--
CAFS_HM_T_00008960	ATP-dependent Lon protease, bacterial type	O	Posttranslational modification, protein turnover, chaperones ;
CAFS_HM_T_00028107	Nucleoside diphosphate kinase	F	Nucleotide transport and metabolism ;
CAFS_HM_T_00070417	Predicted GTPase	R	General function prediction only ;
CAFS_HM_T_00085566	--	--	--
CAFS_HM_T_00086398	Uncharacterized membrane protein YqiK, contains Band7/PHB/SPFH domain	S	Function unknown ;
CAFS_HM_T_00055568	--	--	--
CAFS_HM_T_00016669	Chromosome segregation ATPase	D	Cell cycle control, cell division, chromosome partitioning ;
CAFS_HM_T_00026185	--	--	--
CAFS_HM_T_00070563	Alkyl hydroperoxide reductase subunit AhpC (peroxiredoxin)	V	Defense mechanisms ;
CAFS_HM_T_00036429	Ca2+-binding protein, EF-hand superfamily	T	Signal transduction mechanisms ;
CAFS_HM_T_00088103	--	--	--
CAFS_HM_T_00047347	--	--	--
CAFS_HM_T_00090784	--	--	--
CAFS_HM_T_00036819	Uncharacterized protein, contains caspase domain	R	General function prediction only ;
CAFS_HM_T_00008668	Xanthine dehydrogenase, molybdopterin-binding subunit B	F	Nucleotide transport and metabolism ;
CAFS_HM_T_00021313	O-acetyl-ADP-ribose deacetylase (regulator of RNase III), contains Macro domain	J	Translation, ribosomal structure and biogenesis ;
CAFS_HM_T_00021481	--	--	--
CAFS_HM_T_00077024	Superfamily II DNA and RNA helicase	L	Replication, recombination and repair ;
CAFS_HM_T_00033619	--	--	--
CAFS_HM_T_00043184	Glutaredoxin-related protein	O	Posttranslational modification, protein turnover, chaperones ;
CAFS_HM_T_00051403	WD40 repeat	R	General function prediction only ;
CAFS_HM_T_00083007	Uncharacterized conserved protein RhaS, contains 28 RHS repeats	R	General function prediction only ;
CAFS_HM_T_00037299	--	--	--
CAFS_HM_T_00077233	Protein tyrosine phosphatase	T	Signal transduction mechanisms ;
CAFS_HM_T_00034200	RNA recognition motif (RRM) domain	J	Translation, ribosomal structure and biogenesis ;
CAFS_HM_T_00070491	3-hydroxyacyl-CoA dehydrogenase	I	Lipid transport and metabolism ;
CAFS_HM_T_00008273	Xaa-Pro aminopeptidase	E	Amino acid transport and metabolism ;
CAFS_HM_T_00057231	--	--	--
CAFS_HM_T_00034123	Serine protease inhibitor	O	Posttranslational modification, protein turnover, chaperones ;
CAFS_HM_T_00048637	--	--	--
CAFS_HM_T_00046804	Lysyl-tRNA synthetase (class II)	J	Translation, ribosomal structure and biogenesis ;
CAFS_HM_T_00058857	Pimeloyl-ACP methyl ester carboxylesterase	HR	Coenzyme transport and metabolism ; General function prediction only ;
CAFS_HM_T_00074064	--	--	--
CAFS_HM_T_00070354	Uncharacterized conserved protein, contains DUF3084 domain	S	Function unknown ;
CAFS_HM_T_00055842	--	--	--
CAFS_HM_T_00047267	--	--	--
CAFS_HM_T_00034377	Dipeptidase	E	Amino acid transport and metabolism ;
CAFS_HM_T_00057190	--	--	--
CAFS_HM_T_00082589	Glycerol-3-phosphate dehydrogenase	C	Energy production and conversion ;
CAFS_HM_T_00067743	--	--	--
CAFS_HM_T_00075796	Uncharacterized membrane protein YhgE, phage infection protein (PIP) family	S	Function unknown ;
CAFS_HM_T_00010074	--	--	--
CAFS_HM_T_00055819	Superfamily II DNA and RNA helicase	L	Replication, recombination and repair ;
CAFS_HM_T_00040975	--	--	--
CAFS_HM_T_00080016	Diacylglycerol kinase family enzyme	IR	Lipid transport and metabolism ; General function prediction only ;
CAFS_HM_T_00037057	Magnesium-transporting ATPase (P-type)	P	Inorganic ion transport and metabolism ;
CAFS_HM_T_00054509	WD40 repeat	R	General function prediction only ;
CAFS_HM_T_00009916	--	--	--
CAFS_HM_T_00039756	RNA recognition motif (RRM) domain	J	Translation, ribosomal structure and biogenesis ;
CAFS_HM_T_00058016	Isocitrate/isopropylmalate dehydrogenase	CE	Energy production and conversion ; Amino acid transport and metabolism ;
CAFS_HM_T_00011843	GTPase SAR1 family domain	R	General function prediction only ;
CAFS_HM_T_00051715	Glycosidase	G	Carbohydrate transport and metabolism ;
CAFS_HM_T_00057675	Type V secretory pathway, adhesin AidA	MU	Cell wall/membrane/envelope biogenesis ; Intracellular trafficking, secretion, and vesicular transport ;
CAFS_HM_T_00020835	Inorganic pyrophosphatase	CP	Energy production and conversion ; Inorganic ion transport and metabolism ;
CAFS_HM_T_00026099	--	--	--
CAFS_HM_T_00070526	Malate/lactate dehydrogenase	C	Energy production and conversion ;
CAFS_HM_T_00075789	HrpA-like RNA helicase	J	Translation, ribosomal structure and biogenesis ;
CAFS_HM_T_00071580	Phosphomannomutase	G	Carbohydrate transport and metabolism ;
CAFS_HM_T_00006370	--	--	--
CAFS_HM_T_00049109	--	--	--
CAFS_HM_T_00090003	--	--	--
CAFS_HM_T_00070447	Superfamily II DNA and RNA helicase	L	Replication, recombination and repair ;
CAFS_HM_T_00071325	--	--	--
CAFS_HM_T_00028559	Uncharacterized membrane protein YqiK, contains Band7/PHB/SPFH domain	S	Function unknown ;
CAFS_HM_T_00057832	--	--	--
CAFS_HM_T_00069763	--	--	--
CAFS_HM_T_00048169	--	--	--
CAFS_HM_T_00083362	--	--	--
CAFS_HM_T_00073022	Predicted NTPase, NACHT family domain	T	Signal transduction mechanisms ;
CAFS_HM_T_00044065	N-methylhydantoinase B/oxoprolinase/acetone carboxylase, alpha subunit	EQ	Amino acid transport and metabolism ; Secondary metabolites biosynthesis, transport and catabolism ;
CAFS_HM_T_00037718	--	--	--
CAFS_HM_T_00062655	2-oxoglutarate dehydrogenase complex, dehydrogenase (E1) component, and related enzymes	C	Energy production and conversion ;
CAFS_HM_T_00027820	Autotransporter adhesin	UW	Intracellular trafficking, secretion, and vesicular transport ; Extracellular structures ;
CAFS_HM_T_00023085	Adenylosuccinate synthase	F	Nucleotide transport and metabolism ;
CAFS_HM_T_00090121	Glucose/arabinose dehydrogenase, beta-propeller fold	G	Carbohydrate transport and metabolism ;
CAFS_HM_T_00037961	Chromosome segregation ATPase	D	Cell cycle control, cell division, chromosome partitioning ;
CAFS_HM_T_00085495	--	--	--
CAFS_HM_T_00034302	--	--	--
CAFS_HM_T_00017627	--	--	--
CAFS_HM_T_00009980	Ribosomal protein L4	J	Translation, ribosomal structure and biogenesis ;
CAFS_HM_T_00062420	Uncharacterized conserved protein YbjT, contains NAD(P)-binding and DUF2867 domains	R	General function prediction only ;
CAFS_HM_T_00015851	--	--	--
CAFS_HM_T_00046389	Protein tyrosine phosphatase	T	Signal transduction mechanisms ;
CAFS_HM_T_00015614	Magnesium-transporting ATPase (P-type)	P	Inorganic ion transport and metabolism ;
CAFS_HM_T_00021060	Isoaspartyl peptidase or L-asparaginase, Ntn-hydrolase superfamily	E	Amino acid transport and metabolism ;
CAFS_HM_T_00041170	Uncharacterized coiled-coil protein, contains DUF342 domain	S	Function unknown ;
CAFS_HM_T_00058496	Guanine-nucleotide exchange factor, contains Sec7 domain	R	General function prediction only ;
CAFS_HM_T_00054819	Secreted protein containing bacterial Ig-like domain and vWFA domain	R	General function prediction only ;
CAFS_HM_T_00034480	Serine protease inhibitor	O	Posttranslational modification, protein turnover, chaperones ;
CAFS_HM_T_00028841	--	--	--
CAFS_HM_T_00027661	--	--	--
CAFS_HM_T_00008224	Uncharacterized conserved protein YfaS, alpha-2-macroglobulin family	R	General function prediction only ;
CAFS_HM_T_00004151	Diadenosine tetraphosphatase ApaH/serine/threonine protein phosphatase, PP2A family	T	Signal transduction mechanisms ;
CAFS_HM_T_00077011	--	--	--
CAFS_HM_T_00000309	Molecular chaperone, HSP90 family	O	Posttranslational modification, protein turnover, chaperones ;
CAFS_HM_T_00045056	Cysteinyl-tRNA synthetase	J	Translation, ribosomal structure and biogenesis ;
CAFS_HM_T_00075342	Serine/threonine protein kinase	T	Signal transduction mechanisms ;
CAFS_HM_T_00055227	Pimeloyl-ACP methyl ester carboxylesterase	HR	Coenzyme transport and metabolism ; General function prediction only ;
CAFS_HM_T_00013276	--	--	--
CAFS_HM_T_00041965	--	--	--
CAFS_HM_T_00051016	Long-chain acyl-CoA synthetase (AMP-forming)	I	Lipid transport and metabolism ;
CAFS_HM_T_00034784	GTPase SAR1 family domain	R	General function prediction only ;
CAFS_HM_T_00032670	--	--	--
CAFS_HM_T_00008618	Pyruvate/2-oxoglutarate dehydrogenase complex, dihydrolipoamide acyltransferase (E2) component	C	Energy production and conversion ;
CAFS_HM_T_00001225	Uncharacterized conserved protein YfaS, alpha-2-macroglobulin family	R	General function prediction only ;
CAFS_HM_T_00069939	ATP-dependent 26S proteasome regulatory subunit	O	Posttranslational modification, protein turnover, chaperones ;
CAFS_HM_T_00054900	--	--	--
CAFS_HM_T_00029151	--	--	--
CAFS_HM_T_00049206	--	--	--
CAFS_HM_T_00059556	TPP-dependent pyruvate or acetoin dehydrogenase subunit alpha	C	Energy production and conversion ;
CAFS_HM_T_00077775	--	--	--
CAFS_HM_T_00013171	--	--	--
CAFS_HM_T_00064934	--	--	--
CAFS_HM_T_00064836	--	--	--
CAFS_HM_T_00035435	Diadenosine tetraphosphatase ApaH/serine/threonine protein phosphatase, PP2A family	T	Signal transduction mechanisms ;
CAFS_HM_T_00091702	--	--	--
CAFS_HM_T_00028175	--	--	--
CAFS_HM_T_00013589	Ankyrin repeat	T	Signal transduction mechanisms ;
CAFS_HM_T_00029107	RNA recognition motif (RRM) domain	J	Translation, ribosomal structure and biogenesis ;
CAFS_HM_T_00015516	--	--	--
CAFS_HM_T_00055664	--	--	--
CAFS_HM_T_00010415	Periplasmic protein TonB, links inner and outer membranes	M	Cell wall/membrane/envelope biogenesis ;
CAFS_HM_T_00045863	WD40 repeat	R	General function prediction only ;
CAFS_HM_T_00082500	Uncharacterized membrane protein YqiK, contains Band7/PHB/SPFH domain	S	Function unknown ;
CAFS_HM_T_00085016	--	--	--
CAFS_HM_T_00086665	WD40 repeat	R	General function prediction only ;
CAFS_HM_T_00071211	Phage-related protein, tail component	X	Mobilome: prophages, transposons;
CAFS_HM_T_00042260	--	--	--
CAFS_HM_T_00044087	Diadenosine tetraphosphatase ApaH/serine/threonine protein phosphatase, PP2A family	T	Signal transduction mechanisms ;
CAFS_HM_T_00065752	--	--	--
CAFS_HM_T_00007395	Cu/Zn superoxide dismutase	P	Inorganic ion transport and metabolism ;
CAFS_HM_T_00062063	--	--	--
CAFS_HM_T_00074514	Protein tyrosine phosphatase	T	Signal transduction mechanisms ;
CAFS_HM_T_00011536	--	--	--
CAFS_HM_T_00018085	Serine/threonine protein kinase	T	Signal transduction mechanisms ;
CAFS_HM_T_00058131	Thioesterase domain of type I polyketide synthase or non-ribosomal peptide synthetase	Q	Secondary metabolites biosynthesis, transport and catabolism ;
CAFS_HM_T_00008246	Serine protease, subtilase family	O	Posttranslational modification, protein turnover, chaperones ;
CAFS_HM_T_00019098	--	--	--
CAFS_HM_T_00028114	--	--	--
CAFS_HM_T_00061077	Acetyl-CoA acetyltransferase	I	Lipid transport and metabolism ;
CAFS_HM_T_00090703	--	--	--
CAFS_HM_T_00015013	--	--	--
CAFS_HM_T_00022309	--	--	--
CAFS_HM_T_00005098	Secreted protein containing bacterial Ig-like domain and vWFA domain	R	General function prediction only ;
CAFS_HM_T_00057012	Chromosome segregation ATPase	D	Cell cycle control, cell division, chromosome partitioning ;
CAFS_HM_T_00011011	NAD/NADP transhydrogenase beta subunit	C	Energy production and conversion ;
CAFS_HM_T_00048401	Glycosidase	G	Carbohydrate transport and metabolism ;
CAFS_HM_T_00020162	Ca2+-binding protein, EF-hand superfamily	T	Signal transduction mechanisms ;
CAFS_HM_T_00051875	--	--	--
CAFS_HM_T_00054653	GTPase SAR1 family domain	R	General function prediction only ;
CAFS_HM_T_00042861	--	--	--
CAFS_HM_T_00027846	--	--	--
CAFS_HM_T_00069351	Diadenosine tetraphosphatase ApaH/serine/threonine protein phosphatase, PP2A family	T	Signal transduction mechanisms ;
CAFS_HM_T_00080729	Deoxyadenosine/deoxycytidine kinase	F	Nucleotide transport and metabolism ;
CAFS_HM_T_00076854	GTPase SAR1 family domain	R	General function prediction only ;
CAFS_HM_T_00042664	Alanyl-tRNA synthetase	J	Translation, ribosomal structure and biogenesis ;
CAFS_HM_T_00019364	Ca2+-binding protein, EF-hand superfamily	T	Signal transduction mechanisms ;
CAFS_HM_T_00031153	Archaeal/vacuolar-type H+-ATPase subunit D/Vma8	C	Energy production and conversion ;
CAFS_HM_T_00015619	Molecular chaperone DnaK (HSP70)	O	Posttranslational modification, protein turnover, chaperones ;
CAFS_HM_T_00055425	--	--	--
CAFS_HM_T_00072413	--	--	--
CAFS_HM_T_00018748	Peptidyl-tRNA hydrolase	J	Translation, ribosomal structure and biogenesis ;
CAFS_HM_T_00058811	Glucose-6-phosphate 1-dehydrogenase	G	Carbohydrate transport and metabolism ;
CAFS_HM_T_00065804	--	--	--
CAFS_HM_T_00077499	--	--	--
CAFS_HM_T_00005902	Chromosome segregation ATPase	D	Cell cycle control, cell division, chromosome partitioning ;
CAFS_HM_T_00079530	--	--	--
CAFS_HM_T_00053607	--	--	--
CAFS_HM_T_00070298	Succinyl-CoA synthetase, alpha subunit	C	Energy production and conversion ;
CAFS_HM_T_00026076	--	--	--
CAFS_HM_T_00058233	6-phosphogluconate dehydrogenase	G	Carbohydrate transport and metabolism ;
CAFS_HM_T_00010891	PKD repeat	S	Function unknown ;
CAFS_HM_T_00035269	Diadenosine tetraphosphatase ApaH/serine/threonine protein phosphatase, PP2A family	T	Signal transduction mechanisms ;
CAFS_HM_T_00016637	--	--	--
CAFS_HM_T_00080753	--	--	--
CAFS_HM_T_00001696	--	--	--
CAFS_HM_T_00048124	GTPase SAR1 family domain	R	General function prediction only ;
CAFS_HM_T_00019875	Secreted protein containing bacterial Ig-like domain and vWFA domain	R	General function prediction only ;
CAFS_HM_T_00053257	Autotransporter adhesin	UW	Intracellular trafficking, secretion, and vesicular transport ; Extracellular structures ;
CAFS_HM_T_00068196	--	--	--
CAFS_HM_T_00058247	--	--	--
CAFS_HM_T_00033384	Predicted kinase	R	General function prediction only ;
CAFS_HM_T_00009902	--	--	--
CAFS_HM_T_00021360	Tfp pilus assembly protein PilF	NW	Cell motility ; Extracellular structures ;
CAFS_HM_T_00028027	Predicted esterase	R	General function prediction only ;
CAFS_HM_T_00047183	WD40 repeat	R	General function prediction only ;
CAFS_HM_T_00076554	Long-chain acyl-CoA synthetase (AMP-forming)	I	Lipid transport and metabolism ;
CAFS_HM_T_00077616	Acyl-CoA dehydrogenase related to the alkylation response protein AidB	I	Lipid transport and metabolism ;
CAFS_HM_T_00017517	Serine/threonine protein kinase	T	Signal transduction mechanisms ;
CAFS_HM_T_00055320	Outer membrane protein assembly factor BamB, contains PQQ-like beta-propeller repeat	M	Cell wall/membrane/envelope biogenesis ;
CAFS_HM_T_00017031	Glutamine synthetase	E	Amino acid transport and metabolism ;
CAFS_HM_T_00083467	--	--	--
CAFS_HM_T_00075842	Secreted/periplasmic Zn-dependent peptidases, insulinase-like	O	Posttranslational modification, protein turnover, chaperones ;
CAFS_HM_T_00064310	--	--	--
CAFS_HM_T_00024520	Type V secretory pathway, adhesin AidA	MU	Cell wall/membrane/envelope biogenesis ; Intracellular trafficking, secretion, and vesicular transport ;
CAFS_HM_T_00034495	ATP-dependent 26S proteasome regulatory subunit	O	Posttranslational modification, protein turnover, chaperones ;
CAFS_HM_T_00015238	Serine/threonine protein kinase	T	Signal transduction mechanisms ;
CAFS_HM_T_00080480	Enoyl-CoA hydratase/carnithine racemase	I	Lipid transport and metabolism ;
CAFS_HM_T_00009572	Threonyl-tRNA synthetase	J	Translation, ribosomal structure and biogenesis ;
CAFS_HM_T_00073885	Methionine synthase I (cobalamin-dependent), methyltransferase domain	E	Amino acid transport and metabolism ;
CAFS_HM_T_00069036	Uncharacterized conserved protein, contains CHAT domain	S	Function unknown ;
CAFS_HM_T_00021812	Secreted protein containing bacterial Ig-like domain and vWFA domain	R	General function prediction only ;
CAFS_HM_T_00046251	--	--	--
CAFS_HM_T_00083590	--	--	--
CAFS_HM_T_00064173	--	--	--
CAFS_HM_T_00022776	Enoyl-CoA hydratase/carnithine racemase	I	Lipid transport and metabolism ;
CAFS_HM_T_00040827	--	--	--
CAFS_HM_T_00019838	--	--	--
CAFS_HM_T_00074762	Regulator of protease activity HflC, stomatin/prohibitin superfamily	O	Posttranslational modification, protein turnover, chaperones ;
CAFS_HM_T_00028202	Glutathione S-transferase	O	Posttranslational modification, protein turnover, chaperones ;
CAFS_HM_T_00021273	Serine protease, subtilase family	O	Posttranslational modification, protein turnover, chaperones ;
CAFS_HM_T_00087516	--	--	--
CAFS_HM_T_00065878	WD40 repeat	R	General function prediction only ;
CAFS_HM_T_00037469	Glutathione S-transferase	O	Posttranslational modification, protein turnover, chaperones ;
CAFS_HM_T_00083408	--	--	--
CAFS_HM_T_00011334	--	--	--
CAFS_HM_T_00048449	Dihydroxyacetone kinase	G	Carbohydrate transport and metabolism ;
CAFS_HM_T_00069120	--	--	--
CAFS_HM_T_00000158	--	--	--
CAFS_HM_T_00030647	GTPase SAR1 family domain	R	General function prediction only ;
CAFS_HM_T_00006604	--	--	--
CAFS_HM_T_00085525	GTPase SAR1 family domain	R	General function prediction only ;
CAFS_HM_T_00065545	RNA recognition motif (RRM) domain	J	Translation, ribosomal structure and biogenesis ;
CAFS_HM_T_00069966	GTPase SAR1 family domain	R	General function prediction only ;
CAFS_HM_T_00067100	--	--	--
CAFS_HM_T_00038958	cAMP-binding domain of CRP or a regulatory subunit of cAMP-dependent protein kinases	T	Signal transduction mechanisms ;
CAFS_HM_T_00019699	--	--	--
CAFS_HM_T_00083074	--	--	--
CAFS_HM_T_00085009	--	--	--
CAFS_HM_T_00015969	Superfamily II DNA and RNA helicase	L	Replication, recombination and repair ;
CAFS_HM_T_00052115	Isocitrate/isopropylmalate dehydrogenase	CE	Energy production and conversion ; Amino acid transport and metabolism ;
CAFS_HM_T_00026039	FoF1-type ATP synthase, gamma subunit	C	Energy production and conversion ;
CAFS_HM_T_00071666	ABC-type amino acid transport/signal transduction system, periplasmic component/domain	ET	Amino acid transport and metabolism ; Signal transduction mechanisms ;
CAFS_HM_T_00084142	3-hydroxyisobutyrate dehydrogenase or related beta-hydroxyacid dehydrogenase	I	Lipid transport and metabolism ;
CAFS_HM_T_00077290	Leucine-rich repeat (LRR) protein	K	Transcription ;
CAFS_HM_T_00038524	GTP-binding protein EngB required for normal cell division	D	Cell cycle control, cell division, chromosome partitioning ;
CAFS_HM_T_00059792	Guanine-nucleotide exchange factor, contains Sec7 domain	R	General function prediction only ;
CAFS_HM_T_00014168	7-keto-8-aminopelargonate synthetase or related enzyme	H	Coenzyme transport and metabolism ;
CAFS_HM_T_00063775	Outer membrane protein assembly factor BamA	M	Cell wall/membrane/envelope biogenesis ;
CAFS_HM_T_00038304	Amino acid transporter	E	Amino acid transport and metabolism ;
CAFS_HM_T_00053755	GTPase SAR1 family domain	R	General function prediction only ;
CAFS_HM_T_00022484	Serine/threonine protein phosphatase PrpC	T	Signal transduction mechanisms ;
CAFS_HM_T_00041987	N-acetyl-beta-hexosaminidase	G	Carbohydrate transport and metabolism ;
CAFS_HM_T_00021839	--	--	--
CAFS_HM_T_00034287	Large exoprotein involved in heme utilization or adhesion	U	Intracellular trafficking, secretion, and vesicular transport ;
CAFS_HM_T_00030521	--	--	--
CAFS_HM_T_00017479	--	--	--
CAFS_HM_T_00086755	--	--	--
CAFS_HM_T_00051455	Fructose-bisphosphate aldolase class 1	G	Carbohydrate transport and metabolism ;
CAFS_HM_T_00084358	Serine/threonine protein kinase	T	Signal transduction mechanisms ;
CAFS_HM_T_00044247	--	--	--
CAFS_HM_T_00088720	--	--	--
CAFS_HM_T_00027515	Superfamily II DNA and RNA helicase	L	Replication, recombination and repair ;
CAFS_HM_T_00068410	Uncharacterized membrane protein YqiK, contains Band7/PHB/SPFH domain	S	Function unknown ;
CAFS_HM_T_00045723	--	--	--
CAFS_HM_T_00033843	Protein-L-isoaspartate O-methyltransferase	O	Posttranslational modification, protein turnover, chaperones ;
CAFS_HM_T_00066835	GTPase SAR1 family domain	R	General function prediction only ;
CAFS_HM_T_00019974	Glycine/serine hydroxymethyltransferase	E	Amino acid transport and metabolism ;
CAFS_HM_T_00080071	Pyridoxal/pyridoxine/pyridoxamine kinase	H	Coenzyme transport and metabolism ;
CAFS_HM_T_00059358	--	--	--
CAFS_HM_T_00054757	GTPase SAR1 family domain	R	General function prediction only ;
CAFS_HM_T_00027779	RNA recognition motif (RRM) domain	J	Translation, ribosomal structure and biogenesis ;
CAFS_HM_T_00070626	--	--	--
CAFS_HM_T_00060472	Lantibiotic modifying enzyme	V	Defense mechanisms ;
CAFS_HM_T_00042037	--	--	--
CAFS_HM_T_00008889	GTPase SAR1 family domain	R	General function prediction only ;
CAFS_HM_T_00009213	Acyl-CoA dehydrogenase related to the alkylation response protein AidB	I	Lipid transport and metabolism ;
CAFS_HM_T_00090222	Malate/lactate dehydrogenase	C	Energy production and conversion ;
CAFS_HM_T_00058644	GTPase SAR1 family domain	R	General function prediction only ;
CAFS_HM_T_00037508	RNA recognition motif (RRM) domain	J	Translation, ribosomal structure and biogenesis ;
CAFS_HM_T_00074958	Alkyl hydroperoxide reductase subunit AhpC (peroxiredoxin)	V	Defense mechanisms ;
CAFS_HM_T_00064199	20S proteasome, alpha and beta subunits	O	Posttranslational modification, protein turnover, chaperones ;
CAFS_HM_T_00070481	ATP sulfurylase (sulfate adenylyltransferase)	P	Inorganic ion transport and metabolism ;
CAFS_HM_T_00082931	PASTA domain, binds beta-lactams	M	Cell wall/membrane/envelope biogenesis ;
CAFS_HM_T_00036935	--	--	--
CAFS_HM_T_00009647	GMP synthase, PP-ATPase domain/subunit	F	Nucleotide transport and metabolism ;
CAFS_HM_T_00056263	Streptogramin lyase	V	Defense mechanisms ;
CAFS_HM_T_00033330	Pimeloyl-ACP methyl ester carboxylesterase	HR	Coenzyme transport and metabolism ; General function prediction only ;
CAFS_HM_T_00090195	--	--	--
CAFS_HM_T_00002780	--	--	--
CAFS_HM_T_00058055	--	--	--
CAFS_HM_T_00035442	--	--	--
CAFS_HM_T_00007130	--	--	--
CAFS_HM_T_00007115	--	--	--
CAFS_HM_T_00052068	Regulator of protease activity HflC, stomatin/prohibitin superfamily	O	Posttranslational modification, protein turnover, chaperones ;
CAFS_HM_T_00079213	Superfamily II DNA and RNA helicase	L	Replication, recombination and repair ;
CAFS_HM_T_00049442	--	--	--
CAFS_HM_T_00072126	--	--	--
CAFS_HM_T_00029757	--	--	--
CAFS_HM_T_00063294	GTPase SAR1 family domain	R	General function prediction only ;
CAFS_HM_T_00057814	NAD(P)-dependent dehydrogenase, short-chain alcohol dehydrogenase family	IQR	Lipid transport and metabolism ; Secondary metabolites biosynthesis, transport and catabolism ; General function prediction only ;
CAFS_HM_T_00036660	6-phosphogluconolactonase/Glucosamine-6-phosphate isomerase/deaminase	G	Carbohydrate transport and metabolism ;
CAFS_HM_T_00063501	Isocitrate/isopropylmalate dehydrogenase	CE	Energy production and conversion ; Amino acid transport and metabolism ;
CAFS_HM_T_00090410	Acyl-CoA dehydrogenase related to the alkylation response protein AidB	I	Lipid transport and metabolism ;
CAFS_HM_T_00004093	--	--	--
CAFS_HM_T_00003554	Acetyl/propionyl-CoA carboxylase, alpha subunit	I	Lipid transport and metabolism ;
CAFS_HM_T_00008117	Glycerol-3-phosphate dehydrogenase	C	Energy production and conversion ;
CAFS_HM_T_00060556	--	--	--
CAFS_HM_T_00021106	Glutamate dehydrogenase/leucine dehydrogenase	E	Amino acid transport and metabolism ;
CAFS_HM_T_00058271	--	--	--
CAFS_HM_T_00071010	--	--	--
CAFS_HM_T_00069393	Argininosuccinate synthase	E	Amino acid transport and metabolism ;
CAFS_HM_T_00056866	--	--	--
CAFS_HM_T_00005939	GTPase SAR1 family domain	R	General function prediction only ;
CAFS_HM_T_00049273	HrpA-like RNA helicase	J	Translation, ribosomal structure and biogenesis ;
CAFS_HM_T_00018426	Sugar lactone lactonase YvrE	G	Carbohydrate transport and metabolism ;
CAFS_HM_T_00040868	Dipeptidyl aminopeptidase/acylaminoacyl peptidase	E	Amino acid transport and metabolism ;
CAFS_HM_T_00064081	--	--	--
CAFS_HM_T_00045822	Ribosomal protein S4E	J	Translation, ribosomal structure and biogenesis ;
CAFS_HM_T_00028048	--	--	--
CAFS_HM_T_00060340	Enoyl-CoA hydratase/carnithine racemase	I	Lipid transport and metabolism ;
CAFS_HM_T_00057848	--	--	--
CAFS_HM_T_00064932	Leucine-rich repeat (LRR) protein	K	Transcription ;
CAFS_HM_T_00067653	Chromosome segregation ATPase	D	Cell cycle control, cell division, chromosome partitioning ;
CAFS_HM_T_00007967	GTPase SAR1 family domain	R	General function prediction only ;
CAFS_HM_T_00001305	Methylthioribose-1-phosphate isomerase (methionine salvage pathway), a paralog of eIF-2B alpha subunit	E	Amino acid transport and metabolism ;
CAFS_HM_T_00067348	Ribulose-5-phosphate 4-epimerase/Fuculose-1-phosphate aldolase	G	Carbohydrate transport and metabolism ;
CAFS_HM_T_00035338	--	--	--
CAFS_HM_T_00071403	Sialic acid synthase SpsE, contains C-terminal SAF domain	M	Cell wall/membrane/envelope biogenesis ;
CAFS_HM_T_00075301	GTPase SAR1 family domain	R	General function prediction only ;
CAFS_HM_T_00018477	Methionine aminopeptidase	J	Translation, ribosomal structure and biogenesis ;
CAFS_HM_T_00068756	--	--	--
CAFS_HM_T_00081382	--	--	--
CAFS_HM_T_00065561	Transcription termination factor Rho	K	Transcription ;
CAFS_HM_T_00029239	Asparagine synthetase B (glutamine-hydrolyzing)	E	Amino acid transport and metabolism ;
CAFS_HM_T_00001865	20S proteasome, alpha and beta subunits	O	Posttranslational modification, protein turnover, chaperones ;
CAFS_HM_T_00086776	--	--	--
CAFS_HM_T_00057694	Uncharacterized pyridoxal phosphate-containing protein, affects Ilv metabolism, UPF0001 family	R	General function prediction only ;
CAFS_HM_T_00071700	--	--	--
CAFS_HM_T_00017229	Guanylate kinase	F	Nucleotide transport and metabolism ;
CAFS_HM_T_00010396	Serine/threonine protein kinase	T	Signal transduction mechanisms ;
CAFS_HM_T_00004595	--	--	--
CAFS_HM_T_00027584	Tryptophanyl-tRNA synthetase	J	Translation, ribosomal structure and biogenesis ;
CAFS_HM_T_00039947	Type V secretory pathway, adhesin AidA	MU	Cell wall/membrane/envelope biogenesis ; Intracellular trafficking, secretion, and vesicular transport ;
CAFS_HM_T_00024315	GTPase SAR1 family domain	R	General function prediction only ;
CAFS_HM_T_00081886	Catalase	P	Inorganic ion transport and metabolism ;
CAFS_HM_T_00075094	NADPH:quinone reductase or related Zn-dependent oxidoreductase	CR	Energy production and conversion ; General function prediction only ;
CAFS_HM_T_00065234	Diadenosine tetraphosphatase ApaH/serine/threonine protein phosphatase, PP2A family	T	Signal transduction mechanisms ;
CAFS_HM_T_00052341	PASTA domain, binds beta-lactams	M	Cell wall/membrane/envelope biogenesis ;
CAFS_HM_T_00030479	Predicted arabinose efflux permease, MFS family	G	Carbohydrate transport and metabolism ;
CAFS_HM_T_00002484	--	--	--
CAFS_HM_T_00059330	--	--	--
CAFS_HM_T_00003515	--	--	--
CAFS_HM_T_00057251	--	--	--
CAFS_HM_T_00062017	--	--	--
CAFS_HM_T_00068317	--	--	--
CAFS_HM_T_00061653	--	--	--
CAFS_HM_T_00039282	PASTA domain, binds beta-lactams	M	Cell wall/membrane/envelope biogenesis ;
CAFS_HM_T_00052124	Glutathione S-transferase	O	Posttranslational modification, protein turnover, chaperones ;
CAFS_HM_T_00013500	Superfamily II DNA and RNA helicase	L	Replication, recombination and repair ;
CAFS_HM_T_00035881	GTPase SAR1 family domain	R	General function prediction only ;
CAFS_HM_T_00084561	NAD(P)-dependent dehydrogenase, short-chain alcohol dehydrogenase family	IQR	Lipid transport and metabolism ; Secondary metabolites biosynthesis, transport and catabolism ; General function prediction only ;
CAFS_HM_T_00060807	Asparagine synthetase B (glutamine-hydrolyzing)	E	Amino acid transport and metabolism ;
CAFS_HM_T_00035168	Predicted pyrophosphatase or phosphodiesterase, AlkP superfamily	R	General function prediction only ;
CAFS_HM_T_00040808	--	--	--
CAFS_HM_T_00077479	ATP-dependent Zn proteases	O	Posttranslational modification, protein turnover, chaperones ;
CAFS_HM_T_00074024	Myo-inositol-1-phosphate synthase	I	Lipid transport and metabolism ;
CAFS_HM_T_00023055	Serine/threonine protein phosphatase PrpC	T	Signal transduction mechanisms ;
CAFS_HM_T_00003706	Nicotinamidase-related amidase	HR	Coenzyme transport and metabolism ; General function prediction only ;
CAFS_HM_T_00065057	--	--	--
CAFS_HM_T_00013105	--	--	--
CAFS_HM_T_00026905	Nicotinic acid phosphoribosyltransferase	H	Coenzyme transport and metabolism ;
CAFS_HM_T_00015700	Glycosyltransferase involved in cell wall bisynthesis	M	Cell wall/membrane/envelope biogenesis ;
CAFS_HM_T_00091950	Chromosome segregation ATPase	D	Cell cycle control, cell division, chromosome partitioning ;
CAFS_HM_T_00052674	--	--	--
CAFS_HM_T_00054461	Superfamily II DNA and RNA helicase	L	Replication, recombination and repair ;
CAFS_HM_T_00044586	DnaJ-class molecular chaperone with C-terminal Zn finger domain	O	Posttranslational modification, protein turnover, chaperones ;
CAFS_HM_T_00069052	--	--	--
CAFS_HM_T_00022859	--	--	--
CAFS_HM_T_00069151	Guanylate kinase	F	Nucleotide transport and metabolism ;
CAFS_HM_T_00057886	Ribosomal protein L16/L10AE	J	Translation, ribosomal structure and biogenesis ;
CAFS_HM_T_00010640	Superfamily II DNA and RNA helicase	L	Replication, recombination and repair ;
CAFS_HM_T_00080339	--	--	--
CAFS_HM_T_00054386	Rhodanese-related sulfurtransferase	P	Inorganic ion transport and metabolism ;
CAFS_HM_T_00024150	--	--	--
CAFS_HM_T_00013218	--	--	--
CAFS_HM_T_00038801	GTPase SAR1 family domain	R	General function prediction only ;
CAFS_HM_T_00071645	Murein tripeptide amidase MpaA	M	Cell wall/membrane/envelope biogenesis ;
CAFS_HM_T_00024819	N-Dimethylarginine dimethylaminohydrolase	E	Amino acid transport and metabolism ;
CAFS_HM_T_00046811	Ca2+-dependent lipid-binding protein, contains C2 domain	R	General function prediction only ;
CAFS_HM_T_00086333	1,4-alpha-glucan branching enzyme	G	Carbohydrate transport and metabolism ;
CAFS_HM_T_00064807	Biotin carboxylase	I	Lipid transport and metabolism ;
CAFS_HM_T_00040110	--	--	--
CAFS_HM_T_00008455	--	--	--
CAFS_HM_T_00040458	GTPase SAR1 family domain	R	General function prediction only ;
CAFS_HM_T_00018258	Aspartyl aminopeptidase	E	Amino acid transport and metabolism ;
CAFS_HM_T_00010553	--	--	--
CAFS_HM_T_00082867	GTPase SAR1 family domain	R	General function prediction only ;
CAFS_HM_T_00017543	DNA helicase TIP49, TBP-interacting protein	K	Transcription ;
CAFS_HM_T_00063839	--	--	--
CAFS_HM_T_00081805	Midasin, AAA ATPase with vWA domain, involved in ribosome maturation	J	Translation, ribosomal structure and biogenesis ;
CAFS_HM_T_00083596	--	--	--
CAFS_HM_T_00022652	--	--	--
CAFS_HM_T_00080803	S-formylglutathione hydrolase FrmB	V	Defense mechanisms ;
CAFS_HM_T_00071366	--	--	--
CAFS_HM_T_00089312	RNA recognition motif (RRM) domain	J	Translation, ribosomal structure and biogenesis ;
CAFS_HM_T_00047035	NADH:ubiquinone oxidoreductase 27 kD subunit (chain C)	C	Energy production and conversion ;
CAFS_HM_T_00053199	GTPase SAR1 family domain	R	General function prediction only ;
CAFS_HM_T_00034491	--	--	--
CAFS_HM_T_00087652	Diadenosine tetraphosphatase ApaH/serine/threonine protein phosphatase, PP2A family	T	Signal transduction mechanisms ;
CAFS_HM_T_00026816	RNA-splicing ligase RtcB, repairs tRNA damage	J	Translation, ribosomal structure and biogenesis ;
CAFS_HM_T_00026622	--	--	--
CAFS_HM_T_00003262	Phosphatidate phosphatase PAH1, contains Lipin and LNS2 domains. can be involved in plasmid maintenance	I	Lipid transport and metabolism ;
CAFS_HM_T_00057816	--	--	--
CAFS_HM_T_00028541	--	--	--
CAFS_HM_T_00046461	--	--	--
CAFS_HM_T_00004443	GTPase SAR1 family domain	R	General function prediction only ;
CAFS_HM_T_00063863	Archaeal/vacuolar-type H+-ATPase subunit E/Vma4	C	Energy production and conversion ;
CAFS_HM_T_00027096	--	--	--
CAFS_HM_T_00016071	Membrane-associated protease RseP, regulator of RpoE activity	OK	Posttranslational modification, protein turnover, chaperones ; Transcription ;
CAFS_HM_T_00058261	--	--	--
CAFS_HM_T_00040831	Glutamyl- or glutaminyl-tRNA synthetase	J	Translation, ribosomal structure and biogenesis ;
CAFS_HM_T_00019321	--	--	--
CAFS_HM_T_00056681	Ca2+-binding protein, EF-hand superfamily	T	Signal transduction mechanisms ;
CAFS_HM_T_00038172	GTPase SAR1 family domain	R	General function prediction only ;
CAFS_HM_T_00074421	--	--	--
CAFS_HM_T_00061120	Negative regulator of GroEL, contains thioredoxin-like and TPR-like domains	O	Posttranslational modification, protein turnover, chaperones ;
CAFS_HM_T_00038243	--	--	--
CAFS_HM_T_00032486	Chromosome segregation ATPase	D	Cell cycle control, cell division, chromosome partitioning ;
CAFS_HM_T_00036799	Histidyl-tRNA synthetase	J	Translation, ribosomal structure and biogenesis ;
CAFS_HM_T_00078440	--	--	--
CAFS_HM_T_00078779	3-hydroxyacyl-CoA dehydrogenase	I	Lipid transport and metabolism ;
CAFS_HM_T_00076681	Secreted protein containing bacterial Ig-like domain and vWFA domain	R	General function prediction only ;
CAFS_HM_T_00043172	--	--	--
CAFS_HM_T_00018111	--	--	--
CAFS_HM_T_00055172	ABC-type amino acid transport/signal transduction system, periplasmic component/domain	ET	Amino acid transport and metabolism ; Signal transduction mechanisms ;
CAFS_HM_T_00032155	--	--	--
CAFS_HM_T_00006976	--	--	--
CAFS_HM_T_00085985	Sulfite reductase, alpha subunit (flavoprotein)	P	Inorganic ion transport and metabolism ;
CAFS_HM_T_00055542	--	--	--
CAFS_HM_T_00007284	--	--	--
CAFS_HM_T_00061271	--	--	--
CAFS_HM_T_00090359	Tetratricopeptide (TPR) repeat	R	General function prediction only ;
CAFS_HM_T_00068186	WD40 repeat	R	General function prediction only ;
CAFS_HM_T_00029017	DNA gyrase/topoisomerase IV, subunit B	L	Replication, recombination and repair ;
CAFS_HM_T_00054687	Putative intracellular protease/amidase	R	General function prediction only ;
CAFS_HM_T_00053004	--	--	--
CAFS_HM_T_00064350	Malate/lactate dehydrogenase	C	Energy production and conversion ;
CAFS_HM_T_00064735	--	--	--
CAFS_HM_T_00019700	GTPase SAR1 family domain	R	General function prediction only ;
CAFS_HM_T_00039346	GTPase SAR1 family domain	R	General function prediction only ;
CAFS_HM_T_00006565	PASTA domain, binds beta-lactams	M	Cell wall/membrane/envelope biogenesis ;
CAFS_HM_T_00014281	2-keto-4-pentenoate hydratase/2-oxohepta-3-ene-1,7-dioic acid hydratase (catechol pathway)	Q	Secondary metabolites biosynthesis, transport and catabolism ;
CAFS_HM_T_00001453	Transaldolase	G	Carbohydrate transport and metabolism ;
CAFS_HM_T_00063174	ATP-dependent Zn proteases	O	Posttranslational modification, protein turnover, chaperones ;
CAFS_HM_T_00077372	--	--	--
CAFS_HM_T_00087635	--	--	--
CAFS_HM_T_00013642	Branched-chain amino acid aminotransferase/4-amino-4-deoxychorismate lyase	EH	Amino acid transport and metabolism ; Coenzyme transport and metabolism ;
CAFS_HM_T_00038915	GTPase SAR1 family domain	R	General function prediction only ;
CAFS_HM_T_00059277	Carbonic anhydrase	P	Inorganic ion transport and metabolism ;
CAFS_HM_T_00067327	Ubiquitin-protein ligase	O	Posttranslational modification, protein turnover, chaperones ;
CAFS_HM_T_00009938	--	--	--
CAFS_HM_T_00076345	--	--	--
CAFS_HM_T_00056409	--	--	--
CAFS_HM_T_00073419	Sugar lactone lactonase YvrE	G	Carbohydrate transport and metabolism ;
CAFS_HM_T_00031771	WD40 repeat	R	General function prediction only ;
CAFS_HM_T_00021376	Uncharacterized surface anchored protein	S	Function unknown ;
CAFS_HM_T_00065779	--	--	--
CAFS_HM_T_00054004	Zn-dependent oligopeptidase	E	Amino acid transport and metabolism ;
CAFS_HM_T_00025228	Protein tyrosine phosphatase	T	Signal transduction mechanisms ;
CAFS_HM_T_00052679	Protoheme ferro-lyase (ferrochelatase)	H	Coenzyme transport and metabolism ;
CAFS_HM_T_00075635	--	--	--
CAFS_HM_T_00029106	--	--	--
CAFS_HM_T_00074198	--	--	--
CAFS_HM_T_00051558	Argininosuccinate lyase	E	Amino acid transport and metabolism ;
CAFS_HM_T_00091897	--	--	--
CAFS_HM_T_00053842	--	--	--
CAFS_HM_T_00036812	RNA recognition motif (RRM) domain	J	Translation, ribosomal structure and biogenesis ;
CAFS_HM_T_00062337	Chromosome segregation ATPase	D	Cell cycle control, cell division, chromosome partitioning ;
CAFS_HM_T_00042270	--	--	--
CAFS_HM_T_00017218	Regulator of protease activity HflC, stomatin/prohibitin superfamily	O	Posttranslational modification, protein turnover, chaperones ;
CAFS_HM_T_00062320	--	--	--
CAFS_HM_T_00015738	Regulator of protease activity HflC, stomatin/prohibitin superfamily	O	Posttranslational modification, protein turnover, chaperones ;
CAFS_HM_T_00007003	Glycine/D-amino acid oxidase (deaminating)	E	Amino acid transport and metabolism ;
CAFS_HM_T_00059643	Acyl-CoA hydrolase	I	Lipid transport and metabolism ;
CAFS_HM_T_00075410	GTPase SAR1 family domain	R	General function prediction only ;
CAFS_HM_T_00076349	Superfamily I DNA and/or RNA helicase	L	Replication, recombination and repair ;
CAFS_HM_T_00069480	--	--	--
CAFS_HM_T_00034469	20S proteasome, alpha and beta subunits	O	Posttranslational modification, protein turnover, chaperones ;
CAFS_HM_T_00011835	Arylsulfatase A or related enzyme	P	Inorganic ion transport and metabolism ;
CAFS_HM_T_00073950	Phage-related protein, tail component	X	Mobilome: prophages, transposons;
CAFS_HM_T_00061152	--	--	--
CAFS_HM_T_00038065	Serine protease inhibitor	O	Posttranslational modification, protein turnover, chaperones ;
CAFS_HM_T_00069009	--	--	--
CAFS_HM_T_00091103	Pyruvate/2-oxoglutarate dehydrogenase complex, dihydrolipoamide acyltransferase (E2) component	C	Energy production and conversion ;
CAFS_HM_T_00019174	Aldo/keto reductase, related to diketogulonate reductase	Q	Secondary metabolites biosynthesis, transport and catabolism ;
CAFS_HM_T_00069174	--	--	--
CAFS_HM_T_00006369	Ubiquitin-protein ligase	O	Posttranslational modification, protein turnover, chaperones ;
CAFS_HM_T_00026214	CBS domain	T	Signal transduction mechanisms ;
CAFS_HM_T_00064019	Molybdopterin or thiamine biosynthesis adenylyltransferase	H	Coenzyme transport and metabolism ;
CAFS_HM_T_00054305	GTPase SAR1 family domain	R	General function prediction only ;
CAFS_HM_T_00064181	--	--	--
CAFS_HM_T_00031689	Chromosome segregation ATPase	D	Cell cycle control, cell division, chromosome partitioning ;
CAFS_HM_T_00008491	--	--	--
CAFS_HM_T_00014560	RNA recognition motif (RRM) domain	J	Translation, ribosomal structure and biogenesis ;
CAFS_HM_T_00072640	Methionyl-tRNA synthetase	J	Translation, ribosomal structure and biogenesis ;
CAFS_HM_T_00047022	Secreted trypsin-like serine protease	O	Posttranslational modification, protein turnover, chaperones ;
CAFS_HM_T_00038878	Glutathione S-transferase	O	Posttranslational modification, protein turnover, chaperones ;
CAFS_HM_T_00008018	--	--	--
CAFS_HM_T_00074163	NADH:ubiquinone oxidoreductase 24 kD subunit (chain E)	C	Energy production and conversion ;
CAFS_HM_T_00014129	--	--	--
CAFS_HM_T_00018725	--	--	--
CAFS_HM_T_00083431	Predicted arabinose efflux permease, MFS family	G	Carbohydrate transport and metabolism ;
CAFS_HM_T_00074340	--	--	--
CAFS_HM_T_00019304	--	--	--
CAFS_HM_T_00063425	--	--	--
CAFS_HM_T_00015784	--	--	--
CAFS_HM_T_00086973	--	--	--
CAFS_HM_T_00040188	Glycerol-3-phosphate dehydrogenase	C	Energy production and conversion ;
CAFS_HM_T_00064723	Hexokinase	G	Carbohydrate transport and metabolism ;
CAFS_HM_T_00045652	Rieske Fe-S protein	C	Energy production and conversion ;
CAFS_HM_T_00042247	Ribonucleotide monophosphatase NagD, HAD superfamily	F	Nucleotide transport and metabolism ;
CAFS_HM_T_00055671	GTPase SAR1 family domain	R	General function prediction only ;
CAFS_HM_T_00025124	--	--	--
CAFS_HM_T_00043559	Uncharacterized conserved protein YyaL, SSP411 family, contains thoiredoxin and six-hairpin glycosidase-like domains	R	General function prediction only ;
CAFS_HM_T_00013675	Ribosomal protein L3	J	Translation, ribosomal structure and biogenesis ;
CAFS_HM_T_00014240	--	--	--
CAFS_HM_T_00007163	Monoamine oxidase	E	Amino acid transport and metabolism ;
CAFS_HM_T_00053735	Ubiquitin	O	Posttranslational modification, protein turnover, chaperones ;
CAFS_HM_T_00054643	--	--	--
CAFS_HM_T_00057141	--	--	--
CAFS_HM_T_00053448	Guanine-nucleotide exchange factor, contains Sec7 domain	R	General function prediction only ;
CAFS_HM_T_00067354	--	--	--
CAFS_HM_T_00077810	Predicted ATPase, archaeal AAA+ ATPase superfamily	R	General function prediction only ;
CAFS_HM_T_00036435	ABC-type amino acid transport/signal transduction system, periplasmic component/domain	ET	Amino acid transport and metabolism ; Signal transduction mechanisms ;
CAFS_HM_T_00008502	NAD(P)H-hydrate repair enzyme Nnr, NAD(P)H-hydrate dehydratase domain	F	Nucleotide transport and metabolism ;
CAFS_HM_T_00088559	TPR repeat	T	Signal transduction mechanisms ;
CAFS_HM_T_00014913	Phosphoribosylpyrophosphate synthetase	FE	Nucleotide transport and metabolism ; Amino acid transport and metabolism ;
CAFS_HM_T_00019520	GTPase SAR1 family domain	R	General function prediction only ;
CAFS_HM_T_00091706	Signal recognition particle GTPase	U	Intracellular trafficking, secretion, and vesicular transport ;
CAFS_HM_T_00062902	cAMP-binding domain of CRP or a regulatory subunit of cAMP-dependent protein kinases	T	Signal transduction mechanisms ;
CAFS_HM_T_00040046	--	--	--
CAFS_HM_T_00068955	--	--	--
CAFS_HM_T_00077471	Carbonic anhydrase	P	Inorganic ion transport and metabolism ;
CAFS_HM_T_00089946	--	--	--
CAFS_HM_T_00021595	Tfp pilus assembly protein PilF	NW	Cell motility ; Extracellular structures ;
CAFS_HM_T_00074967	Acetyl-CoA acetyltransferase	I	Lipid transport and metabolism ;
CAFS_HM_T_00051624	Diadenosine tetraphosphatase ApaH/serine/threonine protein phosphatase, PP2A family	T	Signal transduction mechanisms ;
CAFS_HM_T_00025434	--	--	--
CAFS_HM_T_00079714	--	--	--
CAFS_HM_T_00086407	--	--	--
CAFS_HM_T_00075450	Translation elongation factor P (EF-P)/translation initiation factor 5A (eIF-5A)	J	Translation, ribosomal structure and biogenesis ;
CAFS_HM_T_00061160	Translation initiation factor 2, gamma subunit (eIF-2gamma; GTPase)	J	Translation, ribosomal structure and biogenesis ;
CAFS_HM_T_00054414	Uncharacterized protein, UPF0160 family	S	Function unknown ;
CAFS_HM_T_00070596	Anion-transporting ATPase, ArsA/GET3 family	P	Inorganic ion transport and metabolism ;
CAFS_HM_T_00081090	Monoamine oxidase	E	Amino acid transport and metabolism ;
CAFS_HM_T_00068991	Uncharacterized conserved protein, contains CHAT domain	S	Function unknown ;
CAFS_HM_T_00078319	--	--	--
CAFS_HM_T_00038614	DnaJ-class molecular chaperone with C-terminal Zn finger domain	O	Posttranslational modification, protein turnover, chaperones ;
CAFS_HM_T_00092375	--	--	--
CAFS_HM_T_00034394	--	--	--
CAFS_HM_T_00008576	GTPase SAR1 family domain	R	General function prediction only ;
CAFS_HM_T_00043659	Serine/threonine protein kinase	T	Signal transduction mechanisms ;
CAFS_HM_T_00005959	--	--	--
CAFS_HM_T_00053043	Peroxiredoxin	O	Posttranslational modification, protein turnover, chaperones ;
CAFS_HM_T_00003405	--	--	--
CAFS_HM_T_00055269	Ferredoxin-NADP reductase	C	Energy production and conversion ;
CAFS_HM_T_00024561	--	--	--
CAFS_HM_T_00011756	--	--	--
CAFS_HM_T_00041635	--	--	--
CAFS_HM_T_00072430	--	--	--
CAFS_HM_T_00017802	--	--	--
CAFS_HM_T_00059461	Translation elongation factor P (EF-P)/translation initiation factor 5A (eIF-5A)	J	Translation, ribosomal structure and biogenesis ;
CAFS_HM_T_00016084	Ribosomal protein S5	J	Translation, ribosomal structure and biogenesis ;
CAFS_HM_T_00091755	N-acetylneuraminic acid mutarotase	M	Cell wall/membrane/envelope biogenesis ;
CAFS_HM_T_00078396	--	--	--
CAFS_HM_T_00078069	Membrane protein involved in colicin uptake	M	Cell wall/membrane/envelope biogenesis ;
CAFS_HM_T_00028403	PASTA domain, binds beta-lactams	M	Cell wall/membrane/envelope biogenesis ;
CAFS_HM_T_00029332	Uncharacterized conserved protein, contains Zn-finger domain	S	Function unknown ;
CAFS_HM_T_00053960	RNA recognition motif (RRM) domain	J	Translation, ribosomal structure and biogenesis ;
CAFS_HM_T_00084563	Type V secretory pathway, adhesin AidA	MU	Cell wall/membrane/envelope biogenesis ; Intracellular trafficking, secretion, and vesicular transport ;
CAFS_HM_T_00003386	GTPase SAR1 family domain	R	General function prediction only ;
CAFS_HM_T_00056573	Methionine aminopeptidase	J	Translation, ribosomal structure and biogenesis ;
CAFS_HM_T_00029377	ATPase components of ABC transporters with duplicated ATPase domains	R	General function prediction only ;
CAFS_HM_T_00029894	--	--	--
CAFS_HM_T_00004988	Serine/threonine protein kinase	T	Signal transduction mechanisms ;
CAFS_HM_T_00005460	--	--	--
CAFS_HM_T_00017306	Ankyrin repeat	T	Signal transduction mechanisms ;
CAFS_HM_T_00037941	Carotenoid cleavage dioxygenase or a related enzyme	Q	Secondary metabolites biosynthesis, transport and catabolism ;
CAFS_HM_T_00084827	--	--	--
CAFS_HM_T_00067536	--	--	--
CAFS_HM_T_00066767	Alpha-glucosidase, glycosyl hydrolase family GH31	G	Carbohydrate transport and metabolism ;
CAFS_HM_T_00015174	Translation elongation factor EF-1alpha (GTPase)	J	Translation, ribosomal structure and biogenesis ;
CAFS_HM_T_00020544	Glucan phosphorylase	G	Carbohydrate transport and metabolism ;
CAFS_HM_T_00004602	--	--	--
CAFS_HM_T_00039079	--	--	--
CAFS_HM_T_00002793	Superfamily II DNA and RNA helicase	L	Replication, recombination and repair ;
CAFS_HM_T_00017820	--	--	--
CAFS_HM_T_00054850	Transketolase	G	Carbohydrate transport and metabolism ;
CAFS_HM_T_00050307	--	--	--
CAFS_HM_T_00054722	--	--	--
CAFS_HM_T_00078090	Predicted RNA methylase	R	General function prediction only ;
CAFS_HM_T_00000153	--	--	--
CAFS_HM_T_00080561	--	--	--
CAFS_HM_T_00050108	Lysophospholipase, alpha-beta hydrolase superfamily	I	Lipid transport and metabolism ;
CAFS_HM_T_00000557	WD40 repeat	R	General function prediction only ;
CAFS_HM_T_00021322	NADH dehydrogenase, FAD-containing subunit	C	Energy production and conversion ;
CAFS_HM_T_00088131	--	--	--
CAFS_HM_T_00021677	Glucose/arabinose dehydrogenase, beta-propeller fold	G	Carbohydrate transport and metabolism ;
CAFS_HM_T_00012213	Mevalonate pyrophosphate decarboxylase	I	Lipid transport and metabolism ;
CAFS_HM_T_00015429	Acyl-CoA reductase or other NAD-dependent aldehyde dehydrogenase	C	Energy production and conversion ;
CAFS_HM_T_00043452	DNA-binding beta-propeller fold protein YncE	R	General function prediction only ;
CAFS_HM_T_00060161	Negative regulator of GroEL, contains thioredoxin-like and TPR-like domains	O	Posttranslational modification, protein turnover, chaperones ;
CAFS_HM_T_00058421	Diacylglycerol kinase family enzyme	IR	Lipid transport and metabolism ; General function prediction only ;
CAFS_HM_T_00051670	Secreted trypsin-like serine protease	O	Posttranslational modification, protein turnover, chaperones ;
CAFS_HM_T_00014504	Serine/threonine protein kinase	T	Signal transduction mechanisms ;
CAFS_HM_T_00009327	--	--	--
CAFS_HM_T_00081686	Glutamate or tyrosine decarboxylase or a related PLP-dependent protein	E	Amino acid transport and metabolism ;
CAFS_HM_T_00036966	--	--	--
CAFS_HM_T_00041894	Gamma-glutamyl phosphate reductase	E	Amino acid transport and metabolism ;
CAFS_HM_T_00073202	Ubiquinone/menaquinone biosynthesis C-methylase UbiE	H	Coenzyme transport and metabolism ;
CAFS_HM_T_00026530	--	--	--
CAFS_HM_T_00052195	Serine/threonine protein kinase	T	Signal transduction mechanisms ;
CAFS_HM_T_00080203	--	--	--
CAFS_HM_T_00008548	GTPase SAR1 family domain	R	General function prediction only ;
CAFS_HM_T_00041072	--	--	--
CAFS_HM_T_00057859	Guanine-nucleotide exchange factor, contains Sec7 domain	R	General function prediction only ;
CAFS_HM_T_00088066	Catechol 2,3-dioxygenase or other lactoylglutathione lyase family enzyme	Q	Secondary metabolites biosynthesis, transport and catabolism ;
CAFS_HM_T_00078787	--	--	--
CAFS_HM_T_00087477	--	--	--
CAFS_HM_T_00070546	Actin-related protein	Z	Cytoskeleton ;
CAFS_HM_T_00008623	Serine protease inhibitor	O	Posttranslational modification, protein turnover, chaperones ;
CAFS_HM_T_00043899	Membrane-associated protease RseP, regulator of RpoE activity	OK	Posttranslational modification, protein turnover, chaperones ; Transcription ;
CAFS_HM_T_00064882	N-acetyl-beta-hexosaminidase	G	Carbohydrate transport and metabolism ;
CAFS_HM_T_00033864	--	--	--
CAFS_HM_T_00014015	Autotransporter adhesin	UW	Intracellular trafficking, secretion, and vesicular transport ; Extracellular structures ;
CAFS_HM_T_00051731	Adenylosuccinate synthase	F	Nucleotide transport and metabolism ;
CAFS_HM_T_00081432	CBS domain	T	Signal transduction mechanisms ;
CAFS_HM_T_00008022	Acyl-CoA dehydrogenase related to the alkylation response protein AidB	I	Lipid transport and metabolism ;
CAFS_HM_T_00031650	Ca2+-binding protein, EF-hand superfamily	T	Signal transduction mechanisms ;
CAFS_HM_T_00034176	--	--	--
CAFS_HM_T_00018827	--	--	--
CAFS_HM_T_00011215	--	--	--
CAFS_HM_T_00011477	Serine/threonine protein kinase	T	Signal transduction mechanisms ;
CAFS_HM_T_00020517	--	--	--
CAFS_HM_T_00048033	--	--	--
CAFS_HM_T_00062201	--	--	--
CAFS_HM_T_00038417	--	--	--
CAFS_HM_T_00010215	--	--	--
CAFS_HM_T_00009202	WD40 repeat	R	General function prediction only ;
CAFS_HM_T_00004653	--	--	--
CAFS_HM_T_00054197	Serine/threonine protein kinase	T	Signal transduction mechanisms ;
CAFS_HM_T_00044293	Oligoendopeptidase F	E	Amino acid transport and metabolism ;
CAFS_HM_T_00065796	--	--	--
CAFS_HM_T_00043664	Serine/threonine protein phosphatase PrpC	T	Signal transduction mechanisms ;
CAFS_HM_T_00035889	Guanylate kinase	F	Nucleotide transport and metabolism ;
CAFS_HM_T_00020070	Ubiquitin	O	Posttranslational modification, protein turnover, chaperones ;
CAFS_HM_T_00039199	Peptidyl-prolyl cis-trans isomerase (rotamase) - cyclophilin family	O	Posttranslational modification, protein turnover, chaperones ;
CAFS_HM_T_00032818	FKBP-type peptidyl-prolyl cis-trans isomerase	O	Posttranslational modification, protein turnover, chaperones ;
CAFS_HM_T_00086794	--	--	--
CAFS_HM_T_00027839	WD40 repeat	R	General function prediction only ;
CAFS_HM_T_00020202	20S proteasome, alpha and beta subunits	O	Posttranslational modification, protein turnover, chaperones ;
CAFS_HM_T_00020287	Actin-related protein	Z	Cytoskeleton ;
CAFS_HM_T_00060704	Dephospho-CoA kinase	H	Coenzyme transport and metabolism ;
CAFS_HM_T_00075158	--	--	--
CAFS_HM_T_00079342	--	--	--
CAFS_HM_T_00021942	--	--	--
CAFS_HM_T_00089762	Tryptophanyl-tRNA synthetase	J	Translation, ribosomal structure and biogenesis ;
CAFS_HM_T_00060098	Serine protease inhibitor	O	Posttranslational modification, protein turnover, chaperones ;
CAFS_HM_T_00008931	Adenosine deaminase	F	Nucleotide transport and metabolism ;
CAFS_HM_T_00031581	Membrane protein involved in colicin uptake	M	Cell wall/membrane/envelope biogenesis ;
CAFS_HM_T_00074845	Predicted metal-dependent hydrolase, phosphotriesterase family	R	General function prediction only ;
CAFS_HM_T_00025198	Exonuclease III	L	Replication, recombination and repair ;
CAFS_HM_T_00037811	--	--	--
CAFS_HM_T_00089324	--	--	--
CAFS_HM_T_00082869	Uncharacterized conserved protein, contains Zn finger domain	S	Function unknown ;
CAFS_HM_T_00049316	Superfamily II DNA and RNA helicase	L	Replication, recombination and repair ;
CAFS_HM_T_00078107	--	--	--
CAFS_HM_T_00017050	Aspartate/methionine/tyrosine aminotransferase	E	Amino acid transport and metabolism ;
CAFS_HM_T_00073258	--	--	--
CAFS_HM_T_00075825	Serine/threonine protein kinase	T	Signal transduction mechanisms ;
CAFS_HM_T_00070925	Chromosome segregation ATPase	D	Cell cycle control, cell division, chromosome partitioning ;
CAFS_HM_T_00057684	--	--	--
CAFS_HM_T_00077283	--	--	--
CAFS_HM_T_00004769	GTPase SAR1 family domain	R	General function prediction only ;
CAFS_HM_T_00034413	Predicted flavoprotein CzcO associated with the cation diffusion facilitator CzcD	P	Inorganic ion transport and metabolism ;
CAFS_HM_T_00015652	GTPase SAR1 family domain	R	General function prediction only ;
CAFS_HM_T_00007756	Na+/H+-dicarboxylate symporter	C	Energy production and conversion ;
CAFS_HM_T_00091137	Superfamily I DNA and/or RNA helicase	L	Replication, recombination and repair ;
CAFS_HM_T_00009337	Acetolactate synthase large subunit or other thiamine pyrophosphate-requiring enzyme	EH	Amino acid transport and metabolism ; Coenzyme transport and metabolism ;
CAFS_HM_T_00026419	Ca2+-binding protein, EF-hand superfamily	T	Signal transduction mechanisms ;
CAFS_HM_T_00060239	--	--	--
CAFS_HM_T_00079062	--	--	--
CAFS_HM_T_00077413	GTPase SAR1 family domain	R	General function prediction only ;
CAFS_HM_T_00046881	Glucoamylase (glucan-1,4-alpha-glucosidase), GH15 family	G	Carbohydrate transport and metabolism ;
CAFS_HM_T_00081168	Uncharacterized conserved protein YjdB, contains Ig-like domain	R	General function prediction only ;
CAFS_HM_T_00016842	Type V secretory pathway, adhesin AidA	MU	Cell wall/membrane/envelope biogenesis ; Intracellular trafficking, secretion, and vesicular transport ;
CAFS_HM_T_00076330	Transcription elongation factor	K	Transcription ;
CAFS_HM_T_00013221	GTPase SAR1 family domain	R	General function prediction only ;
CAFS_HM_T_00039641	--	--	--
CAFS_HM_T_00043756	--	--	--
CAFS_HM_T_00029282	--	--	--
CAFS_HM_T_00073332	Glycerol kinase	C	Energy production and conversion ;
CAFS_HM_T_00018255	Protein tyrosine phosphatase	T	Signal transduction mechanisms ;
CAFS_HM_T_00063030	--	--	--
CAFS_HM_T_00034397	--	--	--
CAFS_HM_T_00021922	Glutathione S-transferase	O	Posttranslational modification, protein turnover, chaperones ;
CAFS_HM_T_00071989	Uncharacterized conserved protein YfaS, alpha-2-macroglobulin family	R	General function prediction only ;
CAFS_HM_T_00042199	Translation elongation factor EF-1alpha (GTPase)	J	Translation, ribosomal structure and biogenesis ;
CAFS_HM_T_00013213	--	--	--
CAFS_HM_T_00055945	Translation initiation factor RLI1, contains Fe-S and AAA+ ATPase domains	J	Translation, ribosomal structure and biogenesis ;
CAFS_HM_T_00004792	--	--	--
CAFS_HM_T_00024974	--	--	--
CAFS_HM_T_00009342	--	--	--
CAFS_HM_T_00064208	WD40 repeat	R	General function prediction only ;
CAFS_HM_T_00048834	--	--	--
CAFS_HM_T_00037293	--	--	--
CAFS_HM_T_00076677	Secreted protein containing bacterial Ig-like domain and vWFA domain	R	General function prediction only ;
CAFS_HM_T_00011356	Leucine-rich repeat (LRR) protein	K	Transcription ;
CAFS_HM_T_00042870	GTPase SAR1 family domain	R	General function prediction only ;
CAFS_HM_T_00031932	Chromosome segregation ATPase	D	Cell cycle control, cell division, chromosome partitioning ;
CAFS_HM_T_00053128	Secreted protein containing bacterial Ig-like domain and vWFA domain	R	General function prediction only ;
CAFS_HM_T_00022101	--	--	--
CAFS_HM_T_00033605	Predicted ATPase, archaeal AAA+ ATPase superfamily	R	General function prediction only ;
CAFS_HM_T_00083083	Negative regulator of GroEL, contains thioredoxin-like and TPR-like domains	O	Posttranslational modification, protein turnover, chaperones ;
CAFS_HM_T_00084241	Geranylgeranyl pyrophosphate synthase	H	Coenzyme transport and metabolism ;
CAFS_HM_T_00068690	Predicted Zn-dependent peptidase	R	General function prediction only ;
CAFS_HM_T_00010248	--	--	--
CAFS_HM_T_00045017	--	--	--
CAFS_HM_T_00044165	Guanylate kinase	F	Nucleotide transport and metabolism ;
CAFS_HM_T_00005119	--	--	--
CAFS_HM_T_00069991	--	--	--
CAFS_HM_T_00076393	--	--	--
CAFS_HM_T_00069710	Ribosomal protein S3AE	J	Translation, ribosomal structure and biogenesis ;
CAFS_HM_T_00075936	20S proteasome, alpha and beta subunits	O	Posttranslational modification, protein turnover, chaperones ;
CAFS_HM_T_00029352	Predicted NTPase, NACHT family domain	T	Signal transduction mechanisms ;
CAFS_HM_T_00064083	--	--	--
CAFS_HM_T_00089903	20S proteasome, alpha and beta subunits	O	Posttranslational modification, protein turnover, chaperones ;
CAFS_HM_T_00070057	--	--	--
CAFS_HM_T_00075413	Lipopolysaccharide biosynthesis protein, LPS:glycosyltransferase	M	Cell wall/membrane/envelope biogenesis ;
CAFS_HM_T_00058680	--	--	--
CAFS_HM_T_00015701	GTPase SAR1 family domain	R	General function prediction only ;
CAFS_HM_T_00023138	Secreted/periplasmic Zn-dependent peptidases, insulinase-like	O	Posttranslational modification, protein turnover, chaperones ;
CAFS_HM_T_00018783	--	--	--
CAFS_HM_T_00038325	NAD(P)-dependent dehydrogenase, short-chain alcohol dehydrogenase family	IQR	Lipid transport and metabolism ; Secondary metabolites biosynthesis, transport and catabolism ; General function prediction only ;
CAFS_HM_T_00037146	RNA recognition motif (RRM) domain	J	Translation, ribosomal structure and biogenesis ;
CAFS_HM_T_00024668	Ferredoxin-NADP reductase	C	Energy production and conversion ;
CAFS_HM_T_00068002	Phosphoribosylpyrophosphate synthetase	FE	Nucleotide transport and metabolism ; Amino acid transport and metabolism ;
CAFS_HM_T_00078983	GTPase SAR1 family domain	R	General function prediction only ;
CAFS_HM_T_00060627	GTPase SAR1 family domain	R	General function prediction only ;
CAFS_HM_T_00087850	Serine/threonine protein kinase	T	Signal transduction mechanisms ;
CAFS_HM_T_00028769	Superfamily II DNA and RNA helicase	L	Replication, recombination and repair ;
CAFS_HM_T_00045647	--	--	--
CAFS_HM_T_00088572	Aminopeptidase C	E	Amino acid transport and metabolism ;
CAFS_HM_T_00010672	--	--	--
CAFS_HM_T_00028762	--	--	--
CAFS_HM_T_00085144	Fibrillarin-like rRNA methylase	J	Translation, ribosomal structure and biogenesis ;
CAFS_HM_T_00050973	Thiol-disulfide isomerase or thioredoxin	O	Posttranslational modification, protein turnover, chaperones ;
CAFS_HM_T_00022059	--	--	--
CAFS_HM_T_00046260	--	--	--
CAFS_HM_T_00055544	Proteasome lid subunit RPN8/RPN11, contains Jab1/MPN domain metalloenzyme (JAMM) motif	O	Posttranslational modification, protein turnover, chaperones ;
CAFS_HM_T_00053705	Serine/threonine protein kinase	T	Signal transduction mechanisms ;
CAFS_HM_T_00003231	--	--	--
CAFS_HM_T_00046479	--	--	--
CAFS_HM_T_00017194	--	--	--
CAFS_HM_T_00070194	--	--	--
CAFS_HM_T_00052904	N-acetyl-beta-hexosaminidase	G	Carbohydrate transport and metabolism ;
CAFS_HM_T_00067068	NADP-dependent 3-hydroxy acid dehydrogenase YdfG	C	Energy production and conversion ;
CAFS_HM_T_00040341	Glutathione S-transferase	O	Posttranslational modification, protein turnover, chaperones ;
CAFS_HM_T_00035477	--	--	--
CAFS_HM_T_00074258	--	--	--
CAFS_HM_T_00081054	Ribosomal protein L2	J	Translation, ribosomal structure and biogenesis ;
CAFS_HM_T_00046816	HrpA-like RNA helicase	J	Translation, ribosomal structure and biogenesis ;
CAFS_HM_T_00025041	Predicted Zn-dependent peptidase	R	General function prediction only ;
CAFS_HM_T_00076551	Carbon monoxide dehydrogenase subunit G	C	Energy production and conversion ;
CAFS_HM_T_00021828	--	--	--
CAFS_HM_T_00083053	ABC-type multidrug transport system, ATPase and permease component	V	Defense mechanisms ;
CAFS_HM_T_00072452	--	--	--
CAFS_HM_T_00076602	WD40 repeat	R	General function prediction only ;
CAFS_HM_T_00059201	--	--	--
CAFS_HM_T_00041607	--	--	--
CAFS_HM_T_00010233	ABC-type branched-chain amino acid transport system, periplasmic component	E	Amino acid transport and metabolism ;
CAFS_HM_T_00018595	--	--	--
CAFS_HM_T_00017188	Ribosomal protein L18	J	Translation, ribosomal structure and biogenesis ;
CAFS_HM_T_00069122	Fermentation-respiration switch protein FrsA, has esterase activity, DUF1100 family	T	Signal transduction mechanisms ;
CAFS_HM_T_00022081	Sugar lactone lactonase YvrE	G	Carbohydrate transport and metabolism ;
CAFS_HM_T_00027631	Serine/threonine protein kinase	T	Signal transduction mechanisms ;
CAFS_HM_T_00043326	--	--	--
CAFS_HM_T_00086819	Ubiquinone/menaquinone biosynthesis C-methylase UbiE	H	Coenzyme transport and metabolism ;
CAFS_HM_T_00013316	--	--	--
CAFS_HM_T_00065031	Membrane protein involved in colicin uptake	M	Cell wall/membrane/envelope biogenesis ;
CAFS_HM_T_00066875	Adenylate kinase or related kinase	F	Nucleotide transport and metabolism ;
CAFS_HM_T_00049356	--	--	--
CAFS_HM_T_00016510	Cytochrome c2	C	Energy production and conversion ;
CAFS_HM_T_00077079	Acyl-CoA reductase or other NAD-dependent aldehyde dehydrogenase	C	Energy production and conversion ;
CAFS_HM_T_00057233	Type V secretory pathway, adhesin AidA	MU	Cell wall/membrane/envelope biogenesis ; Intracellular trafficking, secretion, and vesicular transport ;
CAFS_HM_T_00090873	Ankyrin repeat	T	Signal transduction mechanisms ;
CAFS_HM_T_00090706	Uncharacterized conserved protein YcbX, contains MOSC and Fe-S domains	R	General function prediction only ;
CAFS_HM_T_00039655	--	--	--
CAFS_HM_T_00029704	--	--	--
CAFS_HM_T_00078804	Enhancing lycopene biosynthesis protein 2	Q	Secondary metabolites biosynthesis, transport and catabolism ;
CAFS_HM_T_00056719	RNA recognition motif (RRM) domain	J	Translation, ribosomal structure and biogenesis ;
CAFS_HM_T_00056710	Spermidine synthase	E	Amino acid transport and metabolism ;
CAFS_HM_T_00042996	Predicted NTPase, NACHT family domain	T	Signal transduction mechanisms ;
CAFS_HM_T_00061439	--	--	--
CAFS_HM_T_00040906	Replication fork clamp-binding protein CrfC (dynamin-like GTPase family)	L	Replication, recombination and repair ;
CAFS_HM_T_00087883	DNA-binding beta-propeller fold protein YncE	R	General function prediction only ;
CAFS_HM_T_00013220	Signal-transduction protein containing cAMP-binding, CBS, and nucleotidyltransferase domains	T	Signal transduction mechanisms ;
CAFS_HM_T_00035316	--	--	--
CAFS_HM_T_00022719	--	--	--
CAFS_HM_T_00072952	Putative Zn-dependent protease, contains TPR repeats	R	General function prediction only ;
CAFS_HM_T_00086643	Serine/threonine protein kinase	T	Signal transduction mechanisms ;
CAFS_HM_T_00024634	Deoxyribose-phosphate aldolase	F	Nucleotide transport and metabolism ;
CAFS_HM_T_00031897	--	--	--
CAFS_HM_T_00027552	Acetoin utilization deacetylase AcuC or a related deacetylase	BQ	Chromatin structure and dynamics ; Secondary metabolites biosynthesis, transport and catabolism ;
CAFS_HM_T_00002927	--	--	--
CAFS_HM_T_00038858	Na+-dependent transporter, SNF family	R	General function prediction only ;
CAFS_HM_T_00069582	--	--	--
CAFS_HM_T_00062244	--	--	--
CAFS_HM_T_00065773	WD40 repeat	R	General function prediction only ;
CAFS_HM_T_00082416	Nicotinamidase-related amidase	HR	Coenzyme transport and metabolism ; General function prediction only ;
CAFS_HM_T_00072546	--	--	--
CAFS_HM_T_00006993	Acyl-CoA synthetase (AMP-forming)/AMP-acid ligase II	IQ	Lipid transport and metabolism ; Secondary metabolites biosynthesis, transport and catabolism ;
CAFS_HM_T_00016532	Ribosome-binding ATPase YchF, GTP1/OBG family	J	Translation, ribosomal structure and biogenesis ;
CAFS_HM_T_00086895	NADP-dependent 3-hydroxy acid dehydrogenase YdfG	C	Energy production and conversion ;
CAFS_HM_T_00051798	--	--	--
CAFS_HM_T_00006780	--	--	--
CAFS_HM_T_00019701	--	--	--
CAFS_HM_T_00082604	--	--	--
CAFS_HM_T_00017856	--	--	--
CAFS_HM_T_00065097	--	--	--
CAFS_HM_T_00082978	--	--	--
CAFS_HM_T_00070898	--	--	--
CAFS_HM_T_00037449	Long-chain acyl-CoA synthetase (AMP-forming)	I	Lipid transport and metabolism ;
CAFS_HM_T_00081213	--	--	--
CAFS_HM_T_00014122	Tetratricopeptide (TPR) repeat	R	General function prediction only ;
CAFS_HM_T_00010878	--	--	--
CAFS_HM_T_00070681	Acyl-CoA synthetase (AMP-forming)/AMP-acid ligase II	IQ	Lipid transport and metabolism ; Secondary metabolites biosynthesis, transport and catabolism ;
CAFS_HM_T_00052893	Predicted NTPase, NACHT family domain	T	Signal transduction mechanisms ;
CAFS_HM_T_00071736	--	--	--
CAFS_HM_T_00074430	--	--	--
CAFS_HM_T_00020870	Chromosome segregation ATPase	D	Cell cycle control, cell division, chromosome partitioning ;
CAFS_HM_T_00067604	--	--	--
CAFS_HM_T_00005587	RNA recognition motif (RRM) domain	J	Translation, ribosomal structure and biogenesis ;
CAFS_HM_T_00047679	Diacylglycerol kinase family enzyme	IR	Lipid transport and metabolism ; General function prediction only ;
CAFS_HM_T_00052797	--	--	--
CAFS_HM_T_00006180	Predicted lipid-binding transport protein, Tim44 family	I	Lipid transport and metabolism ;
CAFS_HM_T_00052461	Proline dehydrogenase	E	Amino acid transport and metabolism ;
CAFS_HM_T_00089922	--	--	--
CAFS_HM_T_00026788	--	--	--
CAFS_HM_T_00048037	Molybdopterin or thiamine biosynthesis adenylyltransferase	H	Coenzyme transport and metabolism ;
CAFS_HM_T_00031202	--	--	--
CAFS_HM_T_00068798	Delta-aminolevulinic acid dehydratase, porphobilinogen synthase	H	Coenzyme transport and metabolism ;
CAFS_HM_T_00089422	ABC-type branched-chain amino acid transport system, periplasmic component	E	Amino acid transport and metabolism ;
CAFS_HM_T_00078874	Carbon monoxide dehydrogenase subunit G	C	Energy production and conversion ;
CAFS_HM_T_00004032	S-adenosylmethionine synthetase	H	Coenzyme transport and metabolism ;
CAFS_HM_T_00006377	--	--	--
CAFS_HM_T_00031362	PASTA domain, binds beta-lactams	M	Cell wall/membrane/envelope biogenesis ;
CAFS_HM_T_00045376	IMP dehydrogenase/GMP reductase	F	Nucleotide transport and metabolism ;
CAFS_HM_T_00081039	Enhancing lycopene biosynthesis protein 2	Q	Secondary metabolites biosynthesis, transport and catabolism ;
CAFS_HM_T_00021889	--	--	--
CAFS_HM_T_00029544	Pimeloyl-ACP methyl ester carboxylesterase	HR	Coenzyme transport and metabolism ; General function prediction only ;
CAFS_HM_T_00015642	Tetratricopeptide (TPR) repeat	R	General function prediction only ;
CAFS_HM_T_00029706	20S proteasome, alpha and beta subunits	O	Posttranslational modification, protein turnover, chaperones ;
CAFS_HM_T_00086286	--	--	--
CAFS_HM_T_00034552	--	--	--
CAFS_HM_T_00067454	--	--	--
CAFS_HM_T_00089584	Forkhead associated (FHA) domain, binds pSer, pThr, pTyr	T	Signal transduction mechanisms ;
CAFS_HM_T_00077329	ADP-ribosylglycohydrolase	O	Posttranslational modification, protein turnover, chaperones ;
CAFS_HM_T_00070365	Pyridoxal/pyridoxine/pyridoxamine kinase	H	Coenzyme transport and metabolism ;
CAFS_HM_T_00086662	Tetratricopeptide (TPR) repeat	R	General function prediction only ;
CAFS_HM_T_00038873	--	--	--
CAFS_HM_T_00050545	RNA processing factor Prp31, contains Nop domain	J	Translation, ribosomal structure and biogenesis ;
CAFS_HM_T_00044201	GTPase SAR1 family domain	R	General function prediction only ;
CAFS_HM_T_00067660	DNA helicase TIP49, TBP-interacting protein	K	Transcription ;
CAFS_HM_T_00061238	--	--	--
CAFS_HM_T_00024850	Secreted trypsin-like serine protease	O	Posttranslational modification, protein turnover, chaperones ;
CAFS_HM_T_00005949	Succinate dehydrogenase/fumarate reductase, Fe-S protein subunit	C	Energy production and conversion ;
CAFS_HM_T_00069169	S-adenosylmethionine synthetase	H	Coenzyme transport and metabolism ;
CAFS_HM_T_00040116	--	--	--
CAFS_HM_T_00056147	--	--	--
CAFS_HM_T_00005623	--	--	--
CAFS_HM_T_00074004	Myo-inositol-1-phosphate synthase	I	Lipid transport and metabolism ;
CAFS_HM_T_00041167	Dipeptidyl aminopeptidase/acylaminoacyl peptidase	E	Amino acid transport and metabolism ;
CAFS_HM_T_00029710	Cysteine protease, C1A family	O	Posttranslational modification, protein turnover, chaperones ;
CAFS_HM_T_00019133	--	--	--
CAFS_HM_T_00027075	Outer membrane protein assembly factor BamA	M	Cell wall/membrane/envelope biogenesis ;
CAFS_HM_T_00025954	Uncharacterized protein, contains caspase domain	R	General function prediction only ;
CAFS_HM_T_00076386	--	--	--
CAFS_HM_T_00048864	Ca2+-binding protein, EF-hand superfamily	T	Signal transduction mechanisms ;
CAFS_HM_T_00069954	--	--	--
CAFS_HM_T_00081922	--	--	--
CAFS_HM_T_00031125	--	--	--
CAFS_HM_T_00072746	Ubiquitin	O	Posttranslational modification, protein turnover, chaperones ;
CAFS_HM_T_00058123	--	--	--
CAFS_HM_T_00013126	Phytoene dehydrogenase-related protein	Q	Secondary metabolites biosynthesis, transport and catabolism ;
CAFS_HM_T_00063933	--	--	--
CAFS_HM_T_00069422	Ribosomal protein L10	J	Translation, ribosomal structure and biogenesis ;
CAFS_HM_T_00017129	GTPase SAR1 family domain	R	General function prediction only ;
CAFS_HM_T_00068116	Predicted ATPase	R	General function prediction only ;
CAFS_HM_T_00012761	--	--	--
CAFS_HM_T_00079783	Serine/threonine protein kinase	T	Signal transduction mechanisms ;
CAFS_HM_T_00028088	Prolyl oligopeptidase PreP, S9A serine peptidase family	E	Amino acid transport and metabolism ;
CAFS_HM_T_00021849	Polyribonucleotide nucleotidyltransferase (polynucleotide phosphorylase)	J	Translation, ribosomal structure and biogenesis ;
CAFS_HM_T_00006426	--	--	--
CAFS_HM_T_00020983	--	--	--
CAFS_HM_T_00082643	DNA-binding beta-propeller fold protein YncE	R	General function prediction only ;
CAFS_HM_T_00074774	Guanylate kinase	F	Nucleotide transport and metabolism ;
CAFS_HM_T_00075464	--	--	--
CAFS_HM_T_00013993	Predicted ATPase, archaeal AAA+ ATPase superfamily	R	General function prediction only ;
CAFS_HM_T_00033379	DNA repair exonuclease SbcCD ATPase subunit	L	Replication, recombination and repair ;
CAFS_HM_T_00071518	Predicted choloylglycine hydrolase	R	General function prediction only ;
CAFS_HM_T_00021073	Hexokinase	G	Carbohydrate transport and metabolism ;
CAFS_HM_T_00077970	RNA recognition motif (RRM) domain	J	Translation, ribosomal structure and biogenesis ;
CAFS_HM_T_00042826	--	--	--
CAFS_HM_T_00060399	Uncharacterized protein YxjI	S	Function unknown ;
CAFS_HM_T_00066340	Uncharacterized conserved protein YfaS, alpha-2-macroglobulin family	R	General function prediction only ;
CAFS_HM_T_00064443	--	--	--
CAFS_HM_T_00086220	--	--	--
CAFS_HM_T_00085056	dsRNA-specific ribonuclease	K	Transcription ;
CAFS_HM_T_00034902	--	--	--
CAFS_HM_T_00013037	Cytochrome P450	QV	Secondary metabolites biosynthesis, transport and catabolism ; Defense mechanisms ;
CAFS_HM_T_00074041	Serine/threonine protein kinase	T	Signal transduction mechanisms ;
CAFS_HM_T_00021256	--	--	--
CAFS_HM_T_00081370	Protein tyrosine phosphatase	T	Signal transduction mechanisms ;
CAFS_HM_T_00069043	PASTA domain, binds beta-lactams	M	Cell wall/membrane/envelope biogenesis ;
CAFS_HM_T_00011977	--	--	--
CAFS_HM_T_00015406	--	--	--
CAFS_HM_T_00069933	WD40 repeat	R	General function prediction only ;
CAFS_HM_T_00036633	--	--	--
CAFS_HM_T_00090680	2-polyprenyl-6-methoxyphenol hydroxylase and related FAD-dependent oxidoreductases	HC	Coenzyme transport and metabolism ; Energy production and conversion ;
CAFS_HM_T_00076272	Purine nucleoside phosphorylase	F	Nucleotide transport and metabolism ;
CAFS_HM_T_00001890	--	--	--
CAFS_HM_T_00074092	--	--	--
CAFS_HM_T_00077719	--	--	--
CAFS_HM_T_00042766	--	--	--
CAFS_HM_T_00019817	Tetratricopeptide (TPR) repeat	R	General function prediction only ;
CAFS_HM_T_00059230	Ankyrin repeat	T	Signal transduction mechanisms ;
CAFS_HM_T_00014693	6-phosphogluconolactonase/Glucosamine-6-phosphate isomerase/deaminase	G	Carbohydrate transport and metabolism ;
CAFS_HM_T_00088487	--	--	--
CAFS_HM_T_00069383	--	--	--
CAFS_HM_T_00003351	Protein tyrosine phosphatase	T	Signal transduction mechanisms ;
CAFS_HM_T_00072728	--	--	--
CAFS_HM_T_00013890	--	--	--
CAFS_HM_T_00045002	Leucine-rich repeat (LRR) protein	K	Transcription ;
CAFS_HM_T_00015034	WD40 repeat	R	General function prediction only ;
CAFS_HM_T_00006315	--	--	--
CAFS_HM_T_00075045	AAA+-type ATPase, SpoVK/Ycf46/Vps4 family	MDT	Cell wall/membrane/envelope biogenesis ; Cell cycle control, cell division, chromosome partitioning ; Signal transduction mechanisms ;
CAFS_HM_T_00005390	--	--	--
CAFS_HM_T_00008159	--	--	--
CAFS_HM_T_00088207	--	--	--
CAFS_HM_T_00090865	Translation initiation factor 2, alpha subunit (eIF-2alpha)	J	Translation, ribosomal structure and biogenesis ;
CAFS_HM_T_00012732	Predicted transcriptional regulator, contains HTH domain	K	Transcription ;
CAFS_HM_T_00044859	--	--	--
CAFS_HM_T_00085736	Translation elongation factor EF-G, a GTPase	J	Translation, ribosomal structure and biogenesis ;
CAFS_HM_T_00064369	--	--	--
CAFS_HM_T_00003972	--	--	--
CAFS_HM_T_00087278	Leucine-rich repeat (LRR) protein	K	Transcription ;
CAFS_HM_T_00003225	Peptidyl-prolyl cis-trans isomerase (rotamase) - cyclophilin family	O	Posttranslational modification, protein turnover, chaperones ;
CAFS_HM_T_00071323	DNA-binding beta-propeller fold protein YncE	R	General function prediction only ;
CAFS_HM_T_00013853	--	--	--
CAFS_HM_T_00087625	Multicopper oxidase with three cupredoxin domains (includes cell division protein FtsP and spore coat protein CotA)	DPM	Cell cycle control, cell division, chromosome partitioning ; Inorganic ion transport and metabolism ; Cell wall/membrane/envelope biogenesis ;
CAFS_HM_T_00030513	RNA recognition motif (RRM) domain	J	Translation, ribosomal structure and biogenesis ;
CAFS_HM_T_00071024	Membrane protein involved in colicin uptake	M	Cell wall/membrane/envelope biogenesis ;
CAFS_HM_T_00032493	20S proteasome, alpha and beta subunits	O	Posttranslational modification, protein turnover, chaperones ;
CAFS_HM_T_00041756	Galactokinase	G	Carbohydrate transport and metabolism ;
CAFS_HM_T_00048314	Translation elongation factor P (EF-P)/translation initiation factor 5A (eIF-5A)	J	Translation, ribosomal structure and biogenesis ;
CAFS_HM_T_00029546	20S proteasome, alpha and beta subunits	O	Posttranslational modification, protein turnover, chaperones ;
CAFS_HM_T_00034512	3'-Phosphoadenosine 5'-phosphosulfate (PAPS) 3'-phosphatase	P	Inorganic ion transport and metabolism ;
CAFS_HM_T_00069566	Cytochrome P450	QV	Secondary metabolites biosynthesis, transport and catabolism ; Defense mechanisms ;
CAFS_HM_T_00081450	Serine/threonine protein kinase	T	Signal transduction mechanisms ;
CAFS_HM_T_00048762	--	--	--
CAFS_HM_T_00028649	--	--	--
CAFS_HM_T_00011558	--	--	--
CAFS_HM_T_00028194	--	--	--
CAFS_HM_T_00089433	WD40 repeat	R	General function prediction only ;
CAFS_HM_T_00080628	--	--	--
CAFS_HM_T_00043726	--	--	--
CAFS_HM_T_00028746	--	--	--
CAFS_HM_T_00092242	--	--	--
CAFS_HM_T_00065937	--	--	--
CAFS_HM_T_00071846	Inorganic pyrophosphatase	CP	Energy production and conversion ; Inorganic ion transport and metabolism ;
CAFS_HM_T_00090136	--	--	--
CAFS_HM_T_00052588	RNA recognition motif (RRM) domain	J	Translation, ribosomal structure and biogenesis ;
CAFS_HM_T_00018630	Protein tyrosine phosphatase	T	Signal transduction mechanisms ;
CAFS_HM_T_00069463	--	--	--
CAFS_HM_T_00047573	PASTA domain, binds beta-lactams	M	Cell wall/membrane/envelope biogenesis ;
CAFS_HM_T_00029226	--	--	--
CAFS_HM_T_00014881	RNA recognition motif (RRM) domain	J	Translation, ribosomal structure and biogenesis ;
CAFS_HM_T_00067641	Serine/threonine protein kinase	T	Signal transduction mechanisms ;
CAFS_HM_T_00029724	--	--	--
CAFS_HM_T_00092009	--	--	--
CAFS_HM_T_00083214	Sugar lactone lactonase YvrE	G	Carbohydrate transport and metabolism ;
CAFS_HM_T_00031451	--	--	--
CAFS_HM_T_00021427	Predicted O-methyltransferase YrrM	R	General function prediction only ;
CAFS_HM_T_00070380	--	--	--
CAFS_HM_T_00018345	Glutathione S-transferase	O	Posttranslational modification, protein turnover, chaperones ;
CAFS_HM_T_00078343	Actin-related protein	Z	Cytoskeleton ;
CAFS_HM_T_00062519	FAD/FMN-containing dehydrogenase	C	Energy production and conversion ;
CAFS_HM_T_00013096	Ribosome-interacting GTPase 1	J	Translation, ribosomal structure and biogenesis ;
CAFS_HM_T_00040009	--	--	--
CAFS_HM_T_00008950	Serine/threonine protein kinase	T	Signal transduction mechanisms ;
CAFS_HM_T_00072456	Neutral trehalase	G	Carbohydrate transport and metabolism ;
CAFS_HM_T_00015612	ADP-ribose pyrophosphatase YjhB, NUDIX family	F	Nucleotide transport and metabolism ;
CAFS_HM_T_00026393	Phage-related protein, tail component	X	Mobilome: prophages, transposons;
CAFS_HM_T_00085036	--	--	--
CAFS_HM_T_00023390	Methionine aminopeptidase	J	Translation, ribosomal structure and biogenesis ;
CAFS_HM_T_00008643	--	--	--
CAFS_HM_T_00086319	Seryl-tRNA synthetase	J	Translation, ribosomal structure and biogenesis ;
CAFS_HM_T_00031942	--	--	--
CAFS_HM_T_00035439	--	--	--
CAFS_HM_T_00011872	DnaJ-class molecular chaperone with C-terminal Zn finger domain	O	Posttranslational modification, protein turnover, chaperones ;
CAFS_HM_T_00051499	--	--	--
CAFS_HM_T_00031462	--	--	--
CAFS_HM_T_00011273	Anaerobic ribonucleoside-triphosphate reductase	F	Nucleotide transport and metabolism ;
CAFS_HM_T_00059823	--	--	--
CAFS_HM_T_00005153	--	--	--
CAFS_HM_T_00070529	UDP-N-acetylglucosamine pyrophosphorylase	G	Carbohydrate transport and metabolism ;
CAFS_HM_T_00089666	Serine/threonine protein kinase	T	Signal transduction mechanisms ;
CAFS_HM_T_00016065	--	--	--
CAFS_HM_T_00036310	--	--	--
CAFS_HM_T_00016265	20S proteasome, alpha and beta subunits	O	Posttranslational modification, protein turnover, chaperones ;
CAFS_HM_T_00063982	Predicted arabinose efflux permease, MFS family	G	Carbohydrate transport and metabolism ;
CAFS_HM_T_00011060	Xaa-Pro aminopeptidase	E	Amino acid transport and metabolism ;
CAFS_HM_T_00043021	--	--	--
CAFS_HM_T_00036307	--	--	--
CAFS_HM_T_00035816	ABC-type amino acid transport/signal transduction system, periplasmic component/domain	ET	Amino acid transport and metabolism ; Signal transduction mechanisms ;
CAFS_HM_T_00027003	--	--	--
CAFS_HM_T_00059764	Serine/threonine protein kinase	T	Signal transduction mechanisms ;
CAFS_HM_T_00022327	--	--	--
CAFS_HM_T_00077423	--	--	--
CAFS_HM_T_00035121	--	--	--
CAFS_HM_T_00010738	--	--	--
CAFS_HM_T_00003950	Adenylate kinase or related kinase	F	Nucleotide transport and metabolism ;
CAFS_HM_T_00013525	--	--	--
CAFS_HM_T_00003310	--	--	--
CAFS_HM_T_00011183	--	--	--
CAFS_HM_T_00058058	--	--	--
CAFS_HM_T_00053411	--	--	--
CAFS_HM_T_00081668	Signal transduction histidine kinase regulating C4-dicarboxylate transport system	T	Signal transduction mechanisms ;
CAFS_HM_T_00053918	--	--	--
CAFS_HM_T_00021130	Secreted trypsin-like serine protease	O	Posttranslational modification, protein turnover, chaperones ;
CAFS_HM_T_00049569	--	--	--
CAFS_HM_T_00075629	Serine/threonine protein kinase	T	Signal transduction mechanisms ;
CAFS_HM_T_00026363	Aldo/keto reductase, related to diketogulonate reductase	Q	Secondary metabolites biosynthesis, transport and catabolism ;
CAFS_HM_T_00038258	Acetoin utilization deacetylase AcuC or a related deacetylase	BQ	Chromatin structure and dynamics ; Secondary metabolites biosynthesis, transport and catabolism ;
CAFS_HM_T_00040362	--	--	--
CAFS_HM_T_00055728	RNA recognition motif (RRM) domain	J	Translation, ribosomal structure and biogenesis ;
CAFS_HM_T_00031758	ABC-type branched-chain amino acid transport system, periplasmic component	E	Amino acid transport and metabolism ;
CAFS_HM_T_00088581	WD40 repeat	R	General function prediction only ;
CAFS_HM_T_00062831	Predicted NTPase, NACHT family domain	T	Signal transduction mechanisms ;
CAFS_HM_T_00081075	Guanylate kinase	F	Nucleotide transport and metabolism ;
CAFS_HM_T_00057622	RNA recognition motif (RRM) domain	J	Translation, ribosomal structure and biogenesis ;
CAFS_HM_T_00062863	Fatty acid desaturase	I	Lipid transport and metabolism ;
CAFS_HM_T_00019043	Leucine-rich repeat (LRR) protein	K	Transcription ;
CAFS_HM_T_00038965	Glycine cleavage system T protein (aminomethyltransferase)	E	Amino acid transport and metabolism ;
CAFS_HM_T_00057480	Putative sterol carrier protein	I	Lipid transport and metabolism ;
CAFS_HM_T_00062757	Peptidyl-prolyl cis-trans isomerase (rotamase) - cyclophilin family	O	Posttranslational modification, protein turnover, chaperones ;
CAFS_HM_T_00043105	--	--	--
CAFS_HM_T_00004548	Guanylate kinase	F	Nucleotide transport and metabolism ;
CAFS_HM_T_00010173	N-acetylneuraminic acid mutarotase	M	Cell wall/membrane/envelope biogenesis ;
CAFS_HM_T_00032817	GTPase SAR1 family domain	R	General function prediction only ;
CAFS_HM_T_00046550	Catalase	P	Inorganic ion transport and metabolism ;
CAFS_HM_T_00082980	Negative regulator of GroEL, contains thioredoxin-like and TPR-like domains	O	Posttranslational modification, protein turnover, chaperones ;
CAFS_HM_T_00072570	Translation initiation factor IF-2, a GTPase	J	Translation, ribosomal structure and biogenesis ;
CAFS_HM_T_00058804	Periplasmic TolA-binding protein (function unknown)	R	General function prediction only ;
CAFS_HM_T_00049194	--	--	--
CAFS_HM_T_00034024	--	--	--
CAFS_HM_T_00015305	Guanylate kinase	F	Nucleotide transport and metabolism ;
CAFS_HM_T_00068693	Cytochrome P450	QV	Secondary metabolites biosynthesis, transport and catabolism ; Defense mechanisms ;
CAFS_HM_T_00059139	PASTA domain, binds beta-lactams	M	Cell wall/membrane/envelope biogenesis ;
CAFS_HM_T_00051022	GTPase SAR1 family domain	R	General function prediction only ;
CAFS_HM_T_00082878	Protein tyrosine phosphatase	T	Signal transduction mechanisms ;
CAFS_HM_T_00075335	--	--	--
CAFS_HM_T_00065524	ABC-type amino acid transport/signal transduction system, periplasmic component/domain	ET	Amino acid transport and metabolism ; Signal transduction mechanisms ;
CAFS_HM_T_00065267	--	--	--
CAFS_HM_T_00029081	--	--	--
CAFS_HM_T_00081537	--	--	--
CAFS_HM_T_00091423	--	--	--
CAFS_HM_T_00087621	Multicopper oxidase with three cupredoxin domains (includes cell division protein FtsP and spore coat protein CotA)	DPM	Cell cycle control, cell division, chromosome partitioning ; Inorganic ion transport and metabolism ; Cell wall/membrane/envelope biogenesis ;
CAFS_HM_T_00003809	RNA recognition motif (RRM) domain	J	Translation, ribosomal structure and biogenesis ;
CAFS_HM_T_00079116	Citrate lyase beta subunit	G	Carbohydrate transport and metabolism ;
CAFS_HM_T_00081646	Dipeptidase	E	Amino acid transport and metabolism ;
CAFS_HM_T_00015571	Enoyl-CoA hydratase/carnithine racemase	I	Lipid transport and metabolism ;
CAFS_HM_T_00016387	--	--	--
CAFS_HM_T_00027955	--	--	--
CAFS_HM_T_00024304	--	--	--
CAFS_HM_T_00051738	Transcriptional accessory protein Tex/SPT6	K	Transcription ;
CAFS_HM_T_00036302	Uncharacterized protein, contains caspase domain	R	General function prediction only ;
CAFS_HM_T_00038498	--	--	--
CAFS_HM_T_00050022	RNA recognition motif (RRM) domain	J	Translation, ribosomal structure and biogenesis ;
CAFS_HM_T_00088450	--	--	--
CAFS_HM_T_00030865	--	--	--
CAFS_HM_T_00030749	--	--	--
CAFS_HM_T_00072140	--	--	--
CAFS_HM_T_00091334	--	--	--
CAFS_HM_T_00043146	--	--	--
CAFS_HM_T_00001446	Glycine/D-amino acid oxidase (deaminating)	E	Amino acid transport and metabolism ;
CAFS_HM_T_00006758	Diadenosine tetraphosphate (Ap4A) hydrolase or other HIT family hydrolase	FGR	Nucleotide transport and metabolism ; Carbohydrate transport and metabolism ; General function prediction only ;
CAFS_HM_T_00085948	Predicted metalloendopeptidase	O	Posttranslational modification, protein turnover, chaperones ;
CAFS_HM_T_00017410	Uncharacterized conserved protein	S	Function unknown ;
CAFS_HM_T_00015603	tRNA U34 5-carboxymethylaminomethyl modifying GTPase MnmE/TrmE	J	Translation, ribosomal structure and biogenesis ;
CAFS_HM_T_00014748	Acyl-CoA dehydrogenase related to the alkylation response protein AidB	I	Lipid transport and metabolism ;
CAFS_HM_T_00077726	Ca2+-binding protein, EF-hand superfamily	T	Signal transduction mechanisms ;
CAFS_HM_T_00073966	--	--	--
CAFS_HM_T_00016804	Hydroxypyruvate isomerase	G	Carbohydrate transport and metabolism ;
CAFS_HM_T_00042046	--	--	--
CAFS_HM_T_00020406	Serine/threonine protein kinase	T	Signal transduction mechanisms ;
CAFS_HM_T_00071120	--	--	--
CAFS_HM_T_00029076	--	--	--
CAFS_HM_T_00011605	--	--	--
CAFS_HM_T_00086233	--	--	--
CAFS_HM_T_00020208	--	--	--
CAFS_HM_T_00020686	--	--	--
CAFS_HM_T_00068852	--	--	--
CAFS_HM_T_00016649	--	--	--
CAFS_HM_T_00014234	--	--	--
CAFS_HM_T_00013087	Leucine-rich repeat (LRR) protein	K	Transcription ;
CAFS_HM_T_00027040	--	--	--
CAFS_HM_T_00013573	Membrane protein involved in colicin uptake	M	Cell wall/membrane/envelope biogenesis ;
CAFS_HM_T_00044414	Predicted ATPase, archaeal AAA+ ATPase superfamily	R	General function prediction only ;
CAFS_HM_T_00068173	--	--	--
CAFS_HM_T_00032538	Serine/threonine protein kinase	T	Signal transduction mechanisms ;
CAFS_HM_T_00073569	--	--	--
CAFS_HM_T_00031399	Secreted trypsin-like serine protease	O	Posttranslational modification, protein turnover, chaperones ;
CAFS_HM_T_00018055	--	--	--
CAFS_HM_T_00016082	Glyoxylase or a related metal-dependent hydrolase, beta-lactamase superfamily II	R	General function prediction only ;
CAFS_HM_T_00079021	--	--	--
CAFS_HM_T_00028073	SAM-dependent methyltransferase	QR	Secondary metabolites biosynthesis, transport and catabolism ; General function prediction only ;
CAFS_HM_T_00037591	Uncharacterized conserved protein	X	Mobilome: prophages, transposons;
CAFS_HM_T_00036942	--	--	--
CAFS_HM_T_00074014	RNA recognition motif (RRM) domain	J	Translation, ribosomal structure and biogenesis ;
CAFS_HM_T_00056873	Leucine-rich repeat (LRR) protein	K	Transcription ;
CAFS_HM_T_00034062	Uncharacterized conserved protein, contains ATP-grasp and redox domains	S	Function unknown ;
CAFS_HM_T_00074929	Pyruvate/2-oxoglutarate dehydrogenase complex, dihydrolipoamide acyltransferase (E2) component	C	Energy production and conversion ;
CAFS_HM_T_00085228	Cell wall hydrolase CwlJ, involved in spore germination	DM	Cell cycle control, cell division, chromosome partitioning ; Cell wall/membrane/envelope biogenesis ;
CAFS_HM_T_00004909	--	--	--
CAFS_HM_T_00006344	Ribonucleotide monophosphatase NagD, HAD superfamily	F	Nucleotide transport and metabolism ;
CAFS_HM_T_00079833	Thioesterase domain of type I polyketide synthase or non-ribosomal peptide synthetase	Q	Secondary metabolites biosynthesis, transport and catabolism ;
CAFS_HM_T_00028216	Cytochrome P450	QV	Secondary metabolites biosynthesis, transport and catabolism ; Defense mechanisms ;
CAFS_HM_T_00004612	Serine/threonine protein phosphatase PrpC	T	Signal transduction mechanisms ;
CAFS_HM_T_00059242	Predicted ATPase	R	General function prediction only ;
CAFS_HM_T_00068867	Serine/threonine protein kinase	T	Signal transduction mechanisms ;
CAFS_HM_T_00020089	Leucine-rich repeat (LRR) protein	K	Transcription ;
CAFS_HM_T_00084703	RNA processing factor Prp31, contains Nop domain	J	Translation, ribosomal structure and biogenesis ;
CAFS_HM_T_00049169	--	--	--
CAFS_HM_T_00057974	--	--	--
CAFS_HM_T_00034712	Phosphoribosylpyrophosphate synthetase	FE	Nucleotide transport and metabolism ; Amino acid transport and metabolism ;
CAFS_HM_T_00004178	Peptide chain release factor 1 (eRF1)	J	Translation, ribosomal structure and biogenesis ;
CAFS_HM_T_00000550	--	--	--
CAFS_HM_T_00007414	DNA-binding beta-propeller fold protein YncE	R	General function prediction only ;
CAFS_HM_T_00007028	--	--	--
CAFS_HM_T_00008685	--	--	--
CAFS_HM_T_00022716	--	--	--
CAFS_HM_T_00005862	Ankyrin repeat	T	Signal transduction mechanisms ;
CAFS_HM_T_00080766	Putative NADPH-quinone reductase (modulator of drug activity B)	R	General function prediction only ;
CAFS_HM_T_00052379	--	--	--
CAFS_HM_T_00077100	Adenylate kinase or related kinase	F	Nucleotide transport and metabolism ;
CAFS_HM_T_00068655	Glycine cleavage system protein P (pyridoxal-binding), C-terminal domain	E	Amino acid transport and metabolism ;
CAFS_HM_T_00080849	--	--	--
CAFS_HM_T_00070268	Ca2+-binding protein, RTX toxin-related	Q	Secondary metabolites biosynthesis, transport and catabolism ;
CAFS_HM_T_00081377	Inosine-uridine nucleoside N-ribohydrolase	F	Nucleotide transport and metabolism ;
CAFS_HM_T_00063581	--	--	--
CAFS_HM_T_00022599	--	--	--
CAFS_HM_T_00051509	Serine/threonine protein kinase	T	Signal transduction mechanisms ;
CAFS_HM_T_00082791	--	--	--
CAFS_HM_T_00059977	WD40 repeat	R	General function prediction only ;
CAFS_HM_T_00036986	Phenylpyruvate tautomerase PptA, 4-oxalocrotonate tautomerase family	Q	Secondary metabolites biosynthesis, transport and catabolism ;
CAFS_HM_T_00043781	DNA-directed RNA polymerase, beta' subunit/160 kD subunit	K	Transcription ;
CAFS_HM_T_00091939	--	--	--
CAFS_HM_T_00080714	--	--	--
CAFS_HM_T_00067320	Serine/threonine protein phosphatase PrpC	T	Signal transduction mechanisms ;
CAFS_HM_T_00081183	GTPase SAR1 family domain	R	General function prediction only ;
CAFS_HM_T_00081621	FAD/FMN-containing dehydrogenase	C	Energy production and conversion ;
CAFS_HM_T_00032931	Translation initiation factor 2, alpha subunit (eIF-2alpha)	J	Translation, ribosomal structure and biogenesis ;
CAFS_HM_T_00069429	Carbonic anhydrase	P	Inorganic ion transport and metabolism ;
CAFS_HM_T_00021002	Chromosome segregation ATPase	D	Cell cycle control, cell division, chromosome partitioning ;
CAFS_HM_T_00071568	--	--	--
CAFS_HM_T_00038668	Ribosomal protein L1	J	Translation, ribosomal structure and biogenesis ;
CAFS_HM_T_00054614	--	--	--
CAFS_HM_T_00034249	--	--	--
CAFS_HM_T_00034080	GDP-D-mannose dehydratase	M	Cell wall/membrane/envelope biogenesis ;
CAFS_HM_T_00050106	Spermidine synthase	E	Amino acid transport and metabolism ;
CAFS_HM_T_00053267	Glucoamylase (glucan-1,4-alpha-glucosidase), GH15 family	G	Carbohydrate transport and metabolism ;
CAFS_HM_T_00034327	--	--	--
CAFS_HM_T_00051148	--	--	--
CAFS_HM_T_00033535	Negative regulator of GroEL, contains thioredoxin-like and TPR-like domains	O	Posttranslational modification, protein turnover, chaperones ;
CAFS_HM_T_00039989	--	--	--
CAFS_HM_T_00080422	--	--	--
CAFS_HM_T_00011193	--	--	--
CAFS_HM_T_00029577	Adenylate kinase or related kinase	F	Nucleotide transport and metabolism ;
CAFS_HM_T_00067071	Alkyl hydroperoxide reductase subunit AhpC (peroxiredoxin)	V	Defense mechanisms ;
CAFS_HM_T_00021066	--	--	--
CAFS_HM_T_00043814	--	--	--
CAFS_HM_T_00046939	RNA recognition motif (RRM) domain	J	Translation, ribosomal structure and biogenesis ;
CAFS_HM_T_00062600	--	--	--
CAFS_HM_T_00067097	--	--	--
CAFS_HM_T_00088749	Molecular chaperone, HSP90 family	O	Posttranslational modification, protein turnover, chaperones ;
CAFS_HM_T_00067532	Ribosomal protein L11	J	Translation, ribosomal structure and biogenesis ;
CAFS_HM_T_00067617	NifU homolog involved in Fe-S cluster formation	O	Posttranslational modification, protein turnover, chaperones ;
CAFS_HM_T_00041469	NADPH-dependent glutamate synthase beta chain or related oxidoreductase	ER	Amino acid transport and metabolism ; General function prediction only ;
CAFS_HM_T_00051634	--	--	--
CAFS_HM_T_00036451	Nucleoside-diphosphate-sugar epimerase	M	Cell wall/membrane/envelope biogenesis ;
CAFS_HM_T_00088947	Serine protease inhibitor	O	Posttranslational modification, protein turnover, chaperones ;
CAFS_HM_T_00057665	Protein-tyrosine-phosphatase	T	Signal transduction mechanisms ;
CAFS_HM_T_00046569	--	--	--
CAFS_HM_T_00065384	--	--	--
CAFS_HM_T_00008270	Heme oxygenase	H	Coenzyme transport and metabolism ;
CAFS_HM_T_00016444	--	--	--
CAFS_HM_T_00013595	--	--	--
CAFS_HM_T_00049726	Acyl-CoA reductase or other NAD-dependent aldehyde dehydrogenase	C	Energy production and conversion ;
CAFS_HM_T_00040233	Uncharacterized membrane protein YhgE, phage infection protein (PIP) family	S	Function unknown ;
CAFS_HM_T_00006578	Tfp pilus assembly protein PilF	NW	Cell motility ; Extracellular structures ;
CAFS_HM_T_00043054	--	--	--
CAFS_HM_T_00075498	Archaeal fructose-1,6-bisphosphatase or related enzyme of inositol monophosphatase family	G	Carbohydrate transport and metabolism ;
CAFS_HM_T_00084054	--	--	--
CAFS_HM_T_00042301	ATP sulfurylase (sulfate adenylyltransferase)	P	Inorganic ion transport and metabolism ;
CAFS_HM_T_00062228	--	--	--
CAFS_HM_T_00025150	Uncharacterized surface anchored protein	S	Function unknown ;
CAFS_HM_T_00041049	--	--	--
CAFS_HM_T_00089758	--	--	--
CAFS_HM_T_00042865	cAMP-binding domain of CRP or a regulatory subunit of cAMP-dependent protein kinases	T	Signal transduction mechanisms ;
CAFS_HM_T_00074234	Acyl-CoA thioesterase FadM	I	Lipid transport and metabolism ;
CAFS_HM_T_00084171	Chromosome segregation ATPase	D	Cell cycle control, cell division, chromosome partitioning ;
CAFS_HM_T_00027158	Cell pole-organizing protein PopZ	D	Cell cycle control, cell division, chromosome partitioning ;
CAFS_HM_T_00049501	Guanylate kinase	F	Nucleotide transport and metabolism ;
CAFS_HM_T_00045348	--	--	--
CAFS_HM_T_00007742	--	--	--
CAFS_HM_T_00046216	--	--	--
CAFS_HM_T_00033904	Cell division protein DamX, binds to the septal ring, contains C-terminal SPOR domain	D	Cell cycle control, cell division, chromosome partitioning ;
CAFS_HM_T_00058389	Translation elongation factor EF-1alpha (GTPase)	J	Translation, ribosomal structure and biogenesis ;
CAFS_HM_T_00026281	Branched-chain amino acid aminotransferase/4-amino-4-deoxychorismate lyase	EH	Amino acid transport and metabolism ; Coenzyme transport and metabolism ;
CAFS_HM_T_00063446	Chromosome segregation ATPase	D	Cell cycle control, cell division, chromosome partitioning ;
CAFS_HM_T_00037855	Coproporphyrinogen III oxidase	H	Coenzyme transport and metabolism ;
CAFS_HM_T_00031276	Tetratricopeptide (TPR) repeat	R	General function prediction only ;
CAFS_HM_T_00071720	NAD(P)-dependent dehydrogenase, short-chain alcohol dehydrogenase family	IQR	Lipid transport and metabolism ; Secondary metabolites biosynthesis, transport and catabolism ; General function prediction only ;
CAFS_HM_T_00036845	--	--	--
CAFS_HM_T_00009377	--	--	--
CAFS_HM_T_00045393	--	--	--
CAFS_HM_T_00074581	PASTA domain, binds beta-lactams	M	Cell wall/membrane/envelope biogenesis ;
CAFS_HM_T_00082173	Ca2+-binding protein, EF-hand superfamily	T	Signal transduction mechanisms ;
CAFS_HM_T_00073685	Alpha-glucosidase, glycosyl hydrolase family GH31	G	Carbohydrate transport and metabolism ;
CAFS_HM_T_00087354	Sensor histidine kinase regulating citrate/malate metabolism	T	Signal transduction mechanisms ;
CAFS_HM_T_00077349	--	--	--
CAFS_HM_T_00073611	Ankyrin repeat	T	Signal transduction mechanisms ;
CAFS_HM_T_00057997	Succinate dehydrogenase/fumarate reductase, Fe-S protein subunit	C	Energy production and conversion ;
CAFS_HM_T_00033764	Forkhead associated (FHA) domain, binds pSer, pThr, pTyr	T	Signal transduction mechanisms ;
CAFS_HM_T_00016582	RNA processing factor Prp31, contains Nop domain	J	Translation, ribosomal structure and biogenesis ;
CAFS_HM_T_00011742	Tetratricopeptide (TPR) repeat	R	General function prediction only ;
CAFS_HM_T_00086072	Ribosomal protein S7	J	Translation, ribosomal structure and biogenesis ;
CAFS_HM_T_00008400	--	--	--
CAFS_HM_T_00021212	Catechol 2,3-dioxygenase or other lactoylglutathione lyase family enzyme	Q	Secondary metabolites biosynthesis, transport and catabolism ;
CAFS_HM_T_00042807	--	--	--
CAFS_HM_T_00027612	--	--	--
CAFS_HM_T_00009332	Beta-galactosidase GanA	G	Carbohydrate transport and metabolism ;
CAFS_HM_T_00076215	Glycine/D-amino acid oxidase (deaminating)	E	Amino acid transport and metabolism ;
CAFS_HM_T_00062928	--	--	--
CAFS_HM_T_00062656	TPR repeat	T	Signal transduction mechanisms ;
CAFS_HM_T_00068503	--	--	--
CAFS_HM_T_00072939	--	--	--
CAFS_HM_T_00038843	--	--	--
CAFS_HM_T_00050053	Predicted ATPase, archaeal AAA+ ATPase superfamily	R	General function prediction only ;
CAFS_HM_T_00028145	Predicted pyrophosphatase or phosphodiesterase, AlkP superfamily	R	General function prediction only ;
CAFS_HM_T_00003795	Predicted NTPase, NACHT family domain	T	Signal transduction mechanisms ;
CAFS_HM_T_00031912	--	--	--
CAFS_HM_T_00090002	--	--	--
CAFS_HM_T_00086451	Acyl-CoA dehydrogenase related to the alkylation response protein AidB	I	Lipid transport and metabolism ;
CAFS_HM_T_00041807	Protein N-acetyltransferase, RimJ/RimL family	JO	Translation, ribosomal structure and biogenesis ; Posttranslational modification, protein turnover, chaperones ;
CAFS_HM_T_00013802	--	--	--
CAFS_HM_T_00054880	ABC-type branched-chain amino acid transport system, periplasmic component	E	Amino acid transport and metabolism ;
CAFS_HM_T_00042621	--	--	--
CAFS_HM_T_00082678	Predicted ATPase	R	General function prediction only ;
CAFS_HM_T_00032624	--	--	--
CAFS_HM_T_00060353	WD40 repeat	R	General function prediction only ;
CAFS_HM_T_00027887	Leucine-rich repeat (LRR) protein	K	Transcription ;
CAFS_HM_T_00091274	--	--	--
CAFS_HM_T_00030573	--	--	--
CAFS_HM_T_00007071	Ca2+-binding protein, RTX toxin-related	Q	Secondary metabolites biosynthesis, transport and catabolism ;
CAFS_HM_T_00011481	GTPase SAR1 family domain	R	General function prediction only ;
CAFS_HM_T_00032332	Formyltetrahydrofolate synthetase	F	Nucleotide transport and metabolism ;
CAFS_HM_T_00033012	GTPase SAR1 family domain	R	General function prediction only ;
CAFS_HM_T_00049093	--	--	--
CAFS_HM_T_00071613	Leucyl aminopeptidase	E	Amino acid transport and metabolism ;
CAFS_HM_T_00080541	Squalene cyclase	I	Lipid transport and metabolism ;
CAFS_HM_T_00000614	--	--	--
CAFS_HM_T_00005721	Uncharacterized coiled-coil protein, contains DUF342 domain	S	Function unknown ;
CAFS_HM_T_00013385	Ribosomal protein L14	J	Translation, ribosomal structure and biogenesis ;
CAFS_HM_T_00035644	--	--	--
CAFS_HM_T_00029421	--	--	--
CAFS_HM_T_00081590	GTPase SAR1 family domain	R	General function prediction only ;
CAFS_HM_T_00016811	CBS domain	T	Signal transduction mechanisms ;
CAFS_HM_T_00056507	--	--	--
CAFS_HM_T_00061256	Molybdopterin or thiamine biosynthesis adenylyltransferase	H	Coenzyme transport and metabolism ;
CAFS_HM_T_00048672	DNA-binding transcriptional regulator, MocR family, contains an aminotransferase domain	KE	Transcription ; Amino acid transport and metabolism ;
CAFS_HM_T_00013438	Ca2+-binding protein, EF-hand superfamily	T	Signal transduction mechanisms ;
CAFS_HM_T_00036477	Fructose-bisphosphate aldolase class 1	G	Carbohydrate transport and metabolism ;
CAFS_HM_T_00059559	Cell division protein FtsN	D	Cell cycle control, cell division, chromosome partitioning ;
CAFS_HM_T_00047334	GTPase SAR1 family domain	R	General function prediction only ;
CAFS_HM_T_00023185	Guanine-nucleotide exchange factor, contains Sec7 domain	R	General function prediction only ;
CAFS_HM_T_00084565	Secreted protein containing bacterial Ig-like domain and vWFA domain	R	General function prediction only ;
CAFS_HM_T_00006560	RNA recognition motif (RRM) domain	J	Translation, ribosomal structure and biogenesis ;
CAFS_HM_T_00007772	NAD(P)-dependent dehydrogenase, short-chain alcohol dehydrogenase family	IQR	Lipid transport and metabolism ; Secondary metabolites biosynthesis, transport and catabolism ; General function prediction only ;
CAFS_HM_T_00052415	--	--	--
CAFS_HM_T_00022405	Pimeloyl-ACP methyl ester carboxylesterase	HR	Coenzyme transport and metabolism ; General function prediction only ;
CAFS_HM_T_00052356	20S proteasome, alpha and beta subunits	O	Posttranslational modification, protein turnover, chaperones ;
CAFS_HM_T_00031881	RNA recognition motif (RRM) domain	J	Translation, ribosomal structure and biogenesis ;
CAFS_HM_T_00028967	Glutathione S-transferase	O	Posttranslational modification, protein turnover, chaperones ;
CAFS_HM_T_00010280	--	--	--
CAFS_HM_T_00060998	Proteasome lid subunit RPN8/RPN11, contains Jab1/MPN domain metalloenzyme (JAMM) motif	O	Posttranslational modification, protein turnover, chaperones ;
CAFS_HM_T_00059317	ABC-type uncharacterized transport system, permease and ATPase components	R	General function prediction only ;
CAFS_HM_T_00090088	Isopropylmalate/homocitrate/citramalate synthases	E	Amino acid transport and metabolism ;
CAFS_HM_T_00050789	--	--	--
CAFS_HM_T_00030553	--	--	--
CAFS_HM_T_00006023	WD40 repeat	R	General function prediction only ;
CAFS_HM_T_00079159	Co-chaperonin GroES (HSP10)	O	Posttranslational modification, protein turnover, chaperones ;
CAFS_HM_T_00078927	Leucine-rich repeat (LRR) protein	K	Transcription ;
CAFS_HM_T_00085776	Phosphoserine phosphatase	E	Amino acid transport and metabolism ;
CAFS_HM_T_00015573	--	--	--
CAFS_HM_T_00028854	--	--	--
CAFS_HM_T_00073412	Phosphoribosylamine-glycine ligase	F	Nucleotide transport and metabolism ;
CAFS_HM_T_00087737	--	--	--
CAFS_HM_T_00076108	Leucine-rich repeat (LRR) protein	K	Transcription ;
CAFS_HM_T_00011027	--	--	--
CAFS_HM_T_00047833	--	--	--
CAFS_HM_T_00023274	--	--	--
CAFS_HM_T_00036021	GTPase SAR1 family domain	R	General function prediction only ;
CAFS_HM_T_00085217	20S proteasome, alpha and beta subunits	O	Posttranslational modification, protein turnover, chaperones ;
CAFS_HM_T_00044146	--	--	--
CAFS_HM_T_00076189	Predicted restriction endonuclease	V	Defense mechanisms ;
CAFS_HM_T_00067443	Acyl-coenzyme A synthetase/AMP-(fatty) acid ligase	I	Lipid transport and metabolism ;
CAFS_HM_T_00065807	--	--	--
CAFS_HM_T_00035362	DNA-directed RNA polymerase, beta subunit/140 kD subunit	K	Transcription ;
CAFS_HM_T_00014640	Tetratricopeptide (TPR) repeat	R	General function prediction only ;
CAFS_HM_T_00088045	--	--	--
CAFS_HM_T_00049002	ATP-dependent Zn proteases	O	Posttranslational modification, protein turnover, chaperones ;
CAFS_HM_T_00046121	Predicted NTPase, NACHT family domain	T	Signal transduction mechanisms ;
CAFS_HM_T_00027576	--	--	--
CAFS_HM_T_00059476	Bacterial lipocalin	M	Cell wall/membrane/envelope biogenesis ;
CAFS_HM_T_00074089	Glutathione peroxidase, house-cleaning role in reducing lipid peroxides	VI	Defense mechanisms ; Lipid transport and metabolism ;
CAFS_HM_T_00077881	NDP-sugar pyrophosphorylase, includes eIF-2Bgamma, eIF-2Bepsilon, and LPS biosynthesis proteins	JM	Translation, ribosomal structure and biogenesis ; Cell wall/membrane/envelope biogenesis ;
CAFS_HM_T_00063326	--	--	--
CAFS_HM_T_00019438	--	--	--
CAFS_HM_T_00036925	--	--	--
CAFS_HM_T_00052939	--	--	--
CAFS_HM_T_00071407	--	--	--
CAFS_HM_T_00041274	--	--	--
CAFS_HM_T_00064915	Serine/threonine protein kinase	T	Signal transduction mechanisms ;
CAFS_HM_T_00038596	--	--	--
CAFS_HM_T_00044873	Predicted Zn-dependent protease	O	Posttranslational modification, protein turnover, chaperones ;
CAFS_HM_T_00066111	--	--	--
CAFS_HM_T_00088288	Uncharacterized conserved protein YfaS, alpha-2-macroglobulin family	R	General function prediction only ;
CAFS_HM_T_00077702	Ribosomal protein L30/L7E	J	Translation, ribosomal structure and biogenesis ;
CAFS_HM_T_00035408	--	--	--
CAFS_HM_T_00062851	--	--	--
CAFS_HM_T_00068850	--	--	--
CAFS_HM_T_00089954	20S proteasome, alpha and beta subunits	O	Posttranslational modification, protein turnover, chaperones ;
CAFS_HM_T_00035312	--	--	--
CAFS_HM_T_00036785	--	--	--
CAFS_HM_T_00013467	PASTA domain, binds beta-lactams	M	Cell wall/membrane/envelope biogenesis ;
CAFS_HM_T_00045282	Carboxylesterase type B	I	Lipid transport and metabolism ;
CAFS_HM_T_00071730	Ribosomal protein L6P/L9E	J	Translation, ribosomal structure and biogenesis ;
CAFS_HM_T_00041749	GTPase SAR1 family domain	R	General function prediction only ;
CAFS_HM_T_00091304	--	--	--
CAFS_HM_T_00071297	Serine/threonine protein kinase	T	Signal transduction mechanisms ;
CAFS_HM_T_00067610	Diadenosine tetraphosphatase ApaH/serine/threonine protein phosphatase, PP2A family	T	Signal transduction mechanisms ;
CAFS_HM_T_00043065	Predicted O-methyltransferase YrrM	R	General function prediction only ;
CAFS_HM_T_00003358	--	--	--
[truncated: 6,355 more rows]

## Sheet: KEGG_anno
KEGG annotation of total quantified proteins in brain.
Protein	KEGG_Description	KEGG_EC	KEGG_ko
CAFS_HM_T_00091449	dynein heavy chain 1, cytosolic	--	ko04145 Phagosome ko04962 Vasopressin-regulated water reabsorption ko05132 Salmonella infection
CAFS_HM_T_00052219	spectrin alpha	--	ko04210 Apoptosis
CAFS_HM_T_00052961	spectrin beta	--	--
CAFS_HM_T_00028830	plectin	--	--
CAFS_HM_T_00007488	clathrin heavy chain	--	ko04142 Lysosome ko04144 Endocytosis ko04721 Synaptic vesicle cycle ko04961 Endocrine and other factor-regulated calcium reabsorption ko05016 Huntington's disease ko05100 Bacterial invasion of epithelial cells
CAFS_HM_T_00086417	clathrin heavy chain	--	ko04142 Lysosome ko04144 Endocytosis ko04721 Synaptic vesicle cycle ko04961 Endocrine and other factor-regulated calcium reabsorption ko05016 Huntington's disease ko05100 Bacterial invasion of epithelial cells
CAFS_HM_T_00065840	spectrin beta	--	--
CAFS_HM_T_00084393	sodium/potassium-transporting ATPase subunit alpha	3.6.3.9	ko04022 cGMP-PKG signaling pathway ko04024 cAMP signaling pathway ko04260 Cardiac muscle contraction ko04261 Adrenergic signaling in cardiomyocytes ko04911 Insulin secretion ko04918 Thyroid hormone synthesis ko04919 Thyroid hormone signaling pathway ko04925 Aldosterone synthesis and secretion ko04960 Aldosterone-regulated sodium reabsorption ko04961 Endocrine and other factor-regulated calcium re…
CAFS_HM_T_00062319	microtubule-associated protein 1	--	--
CAFS_HM_T_00030340	sodium/potassium-transporting ATPase subunit alpha	3.6.3.9	ko04022 cGMP-PKG signaling pathway ko04024 cAMP signaling pathway ko04260 Cardiac muscle contraction ko04261 Adrenergic signaling in cardiomyocytes ko04911 Insulin secretion ko04918 Thyroid hormone synthesis ko04919 Thyroid hormone signaling pathway ko04925 Aldosterone synthesis and secretion ko04960 Aldosterone-regulated sodium reabsorption ko04961 Endocrine and other factor-regulated calcium re…
CAFS_HM_T_00043379	fatty acid synthase, animal type	2.3.1.85	ko00061 Fatty acid biosynthesis ko01100 Metabolic pathways ko01212 Fatty acid metabolism ko04152 AMPK signaling pathway ko04910 Insulin signaling pathway
CAFS_HM_T_00079305	sodium/potassium-transporting ATPase subunit alpha	3.6.3.9	ko04022 cGMP-PKG signaling pathway ko04024 cAMP signaling pathway ko04260 Cardiac muscle contraction ko04261 Adrenergic signaling in cardiomyocytes ko04911 Insulin secretion ko04918 Thyroid hormone synthesis ko04919 Thyroid hormone signaling pathway ko04925 Aldosterone synthesis and secretion ko04960 Aldosterone-regulated sodium reabsorption ko04961 Endocrine and other factor-regulated calcium re…
CAFS_HM_T_00071148	sodium/potassium-transporting ATPase subunit alpha	3.6.3.9	ko04022 cGMP-PKG signaling pathway ko04024 cAMP signaling pathway ko04260 Cardiac muscle contraction ko04261 Adrenergic signaling in cardiomyocytes ko04911 Insulin secretion ko04918 Thyroid hormone synthesis ko04919 Thyroid hormone signaling pathway ko04925 Aldosterone synthesis and secretion ko04960 Aldosterone-regulated sodium reabsorption ko04961 Endocrine and other factor-regulated calcium re…
CAFS_HM_T_00053889	F-type H+-transporting ATPase subunit beta	3.6.3.14	ko00190 Oxidative phosphorylation ko01100 Metabolic pathways ko05010 Alzheimer's disease ko05012 Parkinson's disease ko05016 Huntington's disease
CAFS_HM_T_00054151	tubulin alpha	--	ko04145 Phagosome ko04210 Apoptosis ko04530 Tight junction ko04540 Gap junction ko05130 Pathogenic Escherichia coli infection
CAFS_HM_T_00010561	--	--	--
CAFS_HM_T_00063456	--	--	--
CAFS_HM_T_00033881	creatine kinase	2.7.3.2	ko00330 Arginine and proline metabolism ko01100 Metabolic pathways
CAFS_HM_T_00057653	tubulin alpha	--	ko04145 Phagosome ko04210 Apoptosis ko04530 Tight junction ko04540 Gap junction ko05130 Pathogenic Escherichia coli infection
CAFS_HM_T_00079515	tubulin alpha	--	ko04145 Phagosome ko04210 Apoptosis ko04530 Tight junction ko04540 Gap junction ko05130 Pathogenic Escherichia coli infection
CAFS_HM_T_00052182	syntaxin-binding protein 1	--	ko04721 Synaptic vesicle cycle
CAFS_HM_T_00068134	microtubule-associated protein 1	--	--
CAFS_HM_T_00059705	V-type H+-transporting ATPase subunit A	3.6.3.14	ko00190 Oxidative phosphorylation ko01100 Metabolic pathways ko04145 Phagosome ko04150 mTOR signaling pathway ko04721 Synaptic vesicle cycle ko04966 Collecting duct acid secretion ko05110 Vibrio cholerae infection ko05120 Epithelial cell signaling in Helicobacter pylori infection ko05323 Rheumatoid arthritis
CAFS_HM_T_00047699	--	--	--
CAFS_HM_T_00068886	--	--	ko00061 Fatty acid biosynthesis ko00620 Pyruvate metabolism ko00640 Propanoate metabolism ko01100 Metabolic pathways ko01212 Fatty acid metabolism ko04152 AMPK signaling pathway ko04910 Insulin signaling pathway ko04922 Glucagon signaling pathway
CAFS_HM_T_00067933	V-type H+-transporting ATPase subunit A	3.6.3.14	ko00190 Oxidative phosphorylation ko01100 Metabolic pathways ko04145 Phagosome ko04150 mTOR signaling pathway ko04721 Synaptic vesicle cycle ko04966 Collecting duct acid secretion ko05110 Vibrio cholerae infection ko05120 Epithelial cell signaling in Helicobacter pylori infection ko05323 Rheumatoid arthritis
CAFS_HM_T_00018469	myosin heavy chain	--	ko04530 Tight junction
CAFS_HM_T_00090940	--	--	ko00860 Porphyrin and chlorophyll metabolism ko00970 Aminoacyl-tRNA biosynthesis ko01100 Metabolic pathways
CAFS_HM_T_00088194	heat shock 70kDa protein 1/2/6/8	--	ko03040 Spliceosome ko04010 MAPK signaling pathway ko04141 Protein processing in endoplasmic reticulum ko04144 Endocytosis ko04213 Longevity regulating pathway - multiple species ko04612 Antigen processing and presentation ko04915 Estrogen signaling pathway ko05134 Legionellosis ko05145 Toxoplasmosis ko05162 Measles ko05164 Influenza A ko05169 Epstein-Barr virus infection
CAFS_HM_T_00079514	--	--	--
CAFS_HM_T_00073631	actin beta/gamma 1	--	ko04015 Rap1 signaling pathway ko04145 Phagosome ko04210 Apoptosis ko04390 Hippo signaling pathway ko04391 Hippo signaling pathway - fly ko04510 Focal adhesion ko04520 Adherens junction ko04530 Tight junction ko04611 Platelet activation ko04670 Leukocyte transendothelial migration ko04745 Phototransduction - fly ko04810 Regulation of actin cytoskeleton ko04919 Thyroid hormone signaling pathway ko…
CAFS_HM_T_00056473	enolase	4.2.1.11	ko00010 Glycolysis / Gluconeogenesis ko01100 Metabolic pathways ko01200 Carbon metabolism ko01230 Biosynthesis of amino acids ko03018 RNA degradation ko04066 HIF-1 signaling pathway
CAFS_HM_T_00004099	dihydropyrimidinase-like 2	--	ko04360 Axon guidance
CAFS_HM_T_00091877	glycogen phosphorylase	2.4.1.1	ko00500 Starch and sucrose metabolism ko01100 Metabolic pathways ko04217 Necroptosis ko04910 Insulin signaling pathway ko04922 Glucagon signaling pathway ko04931 Insulin resistance
CAFS_HM_T_00000561	tubulin beta	--	ko04145 Phagosome ko04540 Gap junction ko05130 Pathogenic Escherichia coli infection
CAFS_HM_T_00002604	myosin heavy chain	--	ko04530 Tight junction
CAFS_HM_T_00029551	microtuble-actin crosslinking factor 1	--	--
CAFS_HM_T_00058041	Rab GDP dissociation inhibitor	--	--
CAFS_HM_T_00075212	--	--	ko00500 Starch and sucrose metabolism ko01100 Metabolic pathways
CAFS_HM_T_00069897	tubulin beta	--	ko04145 Phagosome ko04540 Gap junction ko05130 Pathogenic Escherichia coli infection
CAFS_HM_T_00026484	protein piccolo	--	ko04911 Insulin secretion
CAFS_HM_T_00066674	AP-2 complex subunit beta-1	--	ko04144 Endocytosis ko04721 Synaptic vesicle cycle ko04961 Endocrine and other factor-regulated calcium reabsorption ko05016 Huntington's disease
CAFS_HM_T_00010536	myosin V	--	--
CAFS_HM_T_00051391	phosphoglycerate kinase	2.7.2.3	ko00010 Glycolysis / Gluconeogenesis ko01100 Metabolic pathways ko01200 Carbon metabolism ko01230 Biosynthesis of amino acids
CAFS_HM_T_00067028	dynamin GTPase	3.6.5.5	ko04072 Phospholipase D signaling pathway ko04144 Endocytosis ko04721 Synaptic vesicle cycle ko04961 Endocrine and other factor-regulated calcium reabsorption ko05100 Bacterial invasion of epithelial cells
CAFS_HM_T_00045771	microtubule-associated protein 1	--	--
CAFS_HM_T_00006824	talin	--	ko04015 Rap1 signaling pathway ko04510 Focal adhesion ko04611 Platelet activation ko05166 HTLV-I infection
CAFS_HM_T_00021966	dystonin	--	--
CAFS_HM_T_00056689	E3 ubiquitin-protein ligase HUWE1	2.3.2.26	ko04120 Ubiquitin mediated proteolysis
CAFS_HM_T_00021076	hexokinase	2.7.1.1	ko00010 Glycolysis / Gluconeogenesis ko00051 Fructose and mannose metabolism ko00052 Galactose metabolism ko00500 Starch and sucrose metabolism ko00520 Amino sugar and nucleotide sugar metabolism ko00524 Neomycin, kanamycin and gentamicin biosynthesis ko01100 Metabolic pathways ko01200 Carbon metabolism ko04066 HIF-1 signaling pathway ko04910 Insulin signaling pathway ko04930 Type II diabetes mel…
CAFS_HM_T_00065957	transitional endoplasmic reticulum ATPase	--	ko04141 Protein processing in endoplasmic reticulum ko05134 Legionellosis
CAFS_HM_T_00032924	molecular chaperone HtpG	--	ko04141 Protein processing in endoplasmic reticulum ko04151 PI3K-Akt signaling pathway ko04217 Necroptosis ko04612 Antigen processing and presentation ko04621 NOD-like receptor signaling pathway ko04657 IL-17 signaling pathway ko04659 Th17 cell differentiation ko04914 Progesterone-mediated oocyte maturation ko04915 Estrogen signaling pathway ko05200 Pathways in cancer ko05215 Prostate cancer ko05…
CAFS_HM_T_00048923	ankyrin	--	ko04624 Toll and Imd signaling pathway ko05205 Proteoglycans in cancer
CAFS_HM_T_00069903	complement component 3	--	ko04145 Phagosome ko04610 Complement and coagulation cascades ko05133 Pertussis ko05134 Legionellosis ko05140 Leishmaniasis ko05142 Chagas disease (American trypanosomiasis) ko05150 Staphylococcus aureus infection ko05152 Tuberculosis ko05167 Kaposi's sarcoma-associated herpesvirus infection ko05168 Herpes simplex infection ko05203 Viral carcinogenesis ko05322 Systemic lupus erythematosus
CAFS_HM_T_00067579	--	--	--
CAFS_HM_T_00004114	V-type H+-transporting ATPase subunit B	--	ko00190 Oxidative phosphorylation ko01100 Metabolic pathways ko04145 Phagosome ko04150 mTOR signaling pathway ko04721 Synaptic vesicle cycle ko04966 Collecting duct acid secretion ko05110 Vibrio cholerae infection ko05120 Epithelial cell signaling in Helicobacter pylori infection ko05323 Rheumatoid arthritis
CAFS_HM_T_00082002	plectin	--	--
CAFS_HM_T_00056393	filamin	--	ko04010 MAPK signaling pathway ko04510 Focal adhesion ko05132 Salmonella infection ko05205 Proteoglycans in cancer
CAFS_HM_T_00001368	transferrin	--	ko04066 HIF-1 signaling pathway ko04216 Ferroptosis ko04978 Mineral absorption
CAFS_HM_T_00041092	tubulin beta	--	ko04145 Phagosome ko04540 Gap junction ko05130 Pathogenic Escherichia coli infection
CAFS_HM_T_00073543	tubulin alpha	--	ko04145 Phagosome ko04210 Apoptosis ko04530 Tight junction ko04540 Gap junction ko05130 Pathogenic Escherichia coli infection
CAFS_HM_T_00062741	--	--	--
CAFS_HM_T_00043863	aconitate hydratase	4.2.1.3	ko00020 Citrate cycle (TCA cycle) ko00630 Glyoxylate and dicarboxylate metabolism ko01100 Metabolic pathways ko01200 Carbon metabolism ko01210 2-Oxocarboxylic acid metabolism ko01230 Biosynthesis of amino acids
CAFS_HM_T_00075979	tubulin beta	--	ko04145 Phagosome ko04540 Gap junction ko05130 Pathogenic Escherichia coli infection
CAFS_HM_T_00067645	Ca2+ transporting ATPase, sarcoplasmic/endoplasmic reticulum	3.6.3.8	ko04020 Calcium signaling pathway ko04022 cGMP-PKG signaling pathway ko04972 Pancreatic secretion ko05010 Alzheimer's disease
CAFS_HM_T_00015632	ATP citrate (pro-S)-lyase	2.3.3.8	ko00020 Citrate cycle (TCA cycle) ko01100 Metabolic pathways
CAFS_HM_T_00065215	tenascin	--	ko04151 PI3K-Akt signaling pathway ko04510 Focal adhesion ko04512 ECM-receptor interaction ko05165 Human papillomavirus infection ko05206 MicroRNAs in cancer
CAFS_HM_T_00051111	--	--	--
[truncated: 8,285 more rows]

## Sheet: IPR_anno
IPR annotation of total quantified proteins in brain.
[truncated: 8,354 more rows]

[truncated: 1 more sheets: Subcellular.localization_anno]
