# Supplementary material for: Tandem Mass Tagging-Based Quantitative Proteomics Analysis Reveals Damage to the Liver and Brain of Hypophthalmichthys molitrix Exposed to Acute Hypoxia and Reoxygenation
Source: Antioxidants (Basel). 2022 Mar 19;11(3):589. doi: 10.3390/antiox11030589 (PMC8945220; doi:10.3390/antiox11030589)
Supplement: Supplementary file 1 [file antioxidants-11-00589-s001.zip › Table S6.xls]

## Sheet: hy_5h vs ck_5h
Table S6. The differentially abundant proteins (DAPs) in liver among three groups.
DAPs in hy_5h vs ck_0h
Up-regulated
Protein	Fold Change	P.value	Annotation	ck_0h_1	ck_0h_2	ck_0h_3	hy_5h_1	hy_5h_2	hy_5h_3	re_5h_1	re_5h_2	re_5h_3
CAFS_HM_T_00072375	2.79642	0.013565	Lectoxin-Lio1	205.4	203.3	222.5	646.2	622.3	496.6	231.1	228.9	152.8
CAFS_HM_T_00086239	2.11599	0.020412	Nattectin	423.2	406.1	399.3	952.7	914.4	732.6	458.5	453.2	407.3
CAFS_HM_T_00006719	1.76223	0.000214	Antihemorragic factor cHLP-B	7057.5	7251.1	8004.5	12441.3	13367.4	13512.2	5963.9	6136.4	5377.4
CAFS_HM_T_00086404	1.75541	0.004388	Perilipin-2	64.5	60	60.3	111.2	93.2	120	69.8	63.7	64.2
CAFS_HM_T_00090021	1.73088	0.002627	--	235.8	232	259	443.4	445.6	369	199.9	181.4	183.7
CAFS_HM_T_00016021	1.6795	0.000218		196.1	210.3	190.8	342.8	316.6	343.6	357	365.5	332
CAFS_HM_T_00036801	1.67277	0.017559	Cathepsin F	1197.7	1149.7	1193.2	1751.8	2088.3	2082.5	2156	2170.5	2057.8
CAFS_HM_T_00016010	1.61805	0.009409	Heme oxygenase	725.7	806.1	765.6	1371.1	1299.3	1046.9	584	595.8	576.6
CAFS_HM_T_00000005	1.60826	0.006287	--	211.8	205.3	197.6	373.7	294.2	320.7	305.3	284.5	279.3
CAFS_HM_T_00068582	1.5744	5.04e-05	3-hydroxy-3-methylglutaryl-coenzyme A reductase	1730	1796.9	1812.2	2844.9	2703.8	2857.2	2499	2553.2	2333.2
CAFS_HM_T_00001290	1.56684	0.015235	--	117	109.4	103.5	193.8	143.9	179.2	125.2	160.3	139.1
CAFS_HM_T_00039938	1.54252	0.026815	Catechol O-methyltransferase	2143.7	2062.1	2086.3	3572	2894.1	3239.6	2088.5	2089.9	2069.8
CAFS_HM_T_00018176	1.48585	2.71e-05	Heme oxygenase-1	980.4	995.5	960	1432.4	1437	1492.9	1948.6	2100.6	2242.5
CAFS_HM_T_00000978	1.47447	0.000132	Stonustoxin subunit alpha	1964	1983.9	1943.3	2980	2771.7	2934.7	3130.7	3025.6	2951.9
CAFS_HM_T_00041318	1.47038	0.000236	Acyl-CoA desaturase	556.6	578.7	569.9	839.5	869.1	798.7	834.2	826.6	822.3
CAFS_HM_T_00054834	1.46752	0.00076	Inter-alpha-trypsin inhibitor heavy chain H3	278.6	291.4	247.5	403.8	391	404.9	493.9	488	502
CAFS_HM_T_00031871	1.46233	0.000107	Thrombospondin-1	533.9	545.2	549.4	815.2	803.1	763.1	618.4	602.1	597.8
CAFS_HM_T_00054906	1.45865	0.025238	Sodium-coupled neutral amino acid transporter 3	291.3	380.9	303.7	416.6	478.4	528.5	614.8	486	624.3
CAFS_HM_T_00069429	1.44745	0.00412	Carbonic anhydrase 4	184.3	212.5	191.2	274.2	269	307.9	240.5	226.4	210.1
CAFS_HM_T_00053895	1.44543	0.02318	Homer protein homolog 3	14	14.9	16	18.1	23.2	23.6	15.8	14.7	15.7
CAFS_HM_T_00069191	1.43968	0.000893	Phosphoserine aminotransferase	672.3	644.3	653	888.7	949.4	997.5	1020.2	1031.3	1001.8
CAFS_HM_T_00084033	1.42322	0.000151	Syndecan-2-A	298.2	313	312.2	442.1	422.7	449.4	426.6	445	436.8
CAFS_HM_T_00008153	1.42043	0.001145	Complement control protein	192.1	189.5	218.5	287	276.1	289.3	274.5	271.6	258.8
CAFS_HM_T_00040871	1.41723	0.001781	Probable glutamate receptor	4804	4743.7	4937.2	6341.4	7248.8	6938.3	4642.2	4658.7	4314.7
CAFS_HM_T_00079786	1.39123	0.000349	Basic leucine zipper and W2 domain-containing protein 1-B	209.8	203	214.2	281.8	303.3	287.2	299.1	298.6	302.9
CAFS_HM_T_00001623	1.38637	1.62e-05	Proteasome subunit beta type-7	388.7	403.7	389.1	547.3	539	551.7	495.5	536.9	530.4
CAFS_HM_T_00048703	1.372	0.0004	Coagulation factor XIII A chain	1484.7	1529	1448.4	2082.9	2088.4	1950.7	1662.4	1676.6	1629.5
CAFS_HM_T_00004918	1.36725	0.008721	Gamma-glutamyltransferase 5	133.2	148	138.4	208.9	189.8	175	135	133.3	130.7
CAFS_HM_T_00078107	1.36699	0.003151	Retinol-binding protein 1	530.2	534.6	576.4	694.7	759.2	789.6	745.5	764.6	711.8
CAFS_HM_T_00054826	1.36675	0.004614	Inter-alpha-trypsin inhibitor heavy chain H3	151	130	138.9	194.6	200.7	178.6	248.9	211.2	204.4
CAFS_HM_T_00020032	1.35627	0.004518	Phosphoenolpyruvate carboxykinase, cytosolic [GTP]	888.7	887.3	808.3	1249.3	1089.2	1166.5	868.2	931.6	943.5
CAFS_HM_T_00002448	1.33486	0.003436	Protein NLRC3	128.5	147.3	138.1	174.4	186.5	191.6	151.4	156	163.7
CAFS_HM_T_00054759	1.32538	0.000502	Uncharacterized protein C1orf50 homolog	581.8	600.3	582.9	751.1	776.4	811.8	854.4	883.2	855.3
CAFS_HM_T_00061056	1.32534	0.018097	Uncharacterized protein C4H3.07c	622	711.1	606.7	835.1	941.1	794.7	587	621.6	575.8
CAFS_HM_T_00023764	1.30031	0.015212	Complement C1q-like protein 2	96.3	104.1	94.3	119.1	123.4	140.7	69.3	73.5	65.5
CAFS_HM_T_00048600	1.29575	0.000324	Complement C1q-like protein 4	599.5	596.7	626.6	764.2	791.3	806.4	737.4	667.3	708.7
CAFS_HM_T_00067097	1.28202	0.025253	Cytosolic phospholipase A2 gamma	849.7	844.8	835.8	1007.8	1142.4	1093.7	1154.6	1140.7	1115.2
CAFS_HM_T_00062863	1.27855	0.000235	Fatty acid desaturase 2	1164.9	1170.7	1214.2	1521.5	1472.5	1544.6	1457	1452.9	1387.6
CAFS_HM_T_00057269	1.27658	0.003901	Troponin C, skeletal muscle	134.9	128	140.6	167.6	181.7	165.8	579.6	461.7	261.1
CAFS_HM_T_00036892	1.27361	2.91e-05	Zinc transporter ZIP8	311.2	299	303.5	388.2	390.6	384.9	282.2	272.6	260.6
CAFS_HM_T_00067040	1.27106	0.005972	Vitamin K epoxide reductase complex subunit 1-like protein 1	205.8	224.6	213	255	275.5	287.3	258.8	247.5	264.2
CAFS_HM_T_00001288	1.26935	0.000746	CD48 antigen	1933.2	1895.3	1950.3	2359.7	2432.2	2543.4	1751	1967.4	1925.8
CAFS_HM_T_00067100	1.26437	0.000125	Cytosolic phospholipase A2 gamma	1587.4	1544.7	1523.1	2002.1	1949.5	1934.3	2160.6	2033.7	2085.1
CAFS_HM_T_00073473	1.26132	0.021555	Myosin light chain 3, skeletal muscle isoform	318.9	302.2	297.3	344.6	403.7	410.1	2278.5	1735.1	838.2
CAFS_HM_T_00043635	1.25919	0.037009	Integrin beta-3	747.2	748.1	710.4	963	1007.2	807.2	611.2	611.3	571.9
CAFS_HM_T_00074024	1.25843	0.031974	Inositol-3-phosphate synthase 1-A	141.8	167.7	144.4	179.1	207.9	184.2	159.1	152.2	131.7
CAFS_HM_T_00089943	1.2557	0.002135	SET and MYND domain-containing protein 3	84.2	78.5	78.6	100.7	97.3	105	95.1	105	93.1
CAFS_HM_T_00022408	1.25486	0.005391	Cofilin-1-A	315.3	354.2	338.1	401.8	423.6	439	341.6	343.1	336.7
CAFS_HM_T_00087876	1.25338	0.003389	Protein FAM55C	759.2	732.6	680.4	941.3	902.6	878.7	1038.7	1105	1017.5
CAFS_HM_T_00053649	1.25179	0.001467	Nicotinamide phosphoribosyltransferase	2037.8	2107.4	2112.3	2551.1	2545	2737	2706.1	2715.3	2678.9
CAFS_HM_T_00077286	1.25069	0.000402	Serotransferrin-1	7246.3	6940.6	7220.5	8956.4	8682.3	9135.4	10438.7	10504.9	10280.6
CAFS_HM_T_00066067	1.24765	0.047072	Cathepsin L1	3354.8	3292.8	3372.4	3788.5	4390.3	4322.7	4808.6	4722.4	4846.4
CAFS_HM_T_00060751	1.23709	0.014393	ATP-dependent zinc metalloprotease YME1L1	124.2	113.7	106.7	148.9	134.5	142.9	147.9	140.7	135.4
CAFS_HM_T_00078043	1.23656	0.003109	Complement C1q-like protein 4	2726.2	2531.8	2739.4	3433.1	3185	3271.2	3556.6	3578.8	3439.5
CAFS_HM_T_00059760	1.23593	0.040718	Cryptochrome DASH	137.7	145.9	150	195.2	182.5	158.2	174.8	196.1	195.8
CAFS_HM_T_00022785	1.23491	0.028048	N(4)-(Beta-N-acetylglucosaminyl)-L-asparaginase	107	124.2	120	156.9	140.7	136.1	146.3	145.4	157.2
CAFS_HM_T_00032545	1.23408	0.002829	Transmembrane emp24 domain-containing protein 5	357.8	348.8	351.6	412.9	437.5	455.5	470.6	496	480.5
CAFS_HM_T_00068639	1.23397	0.024227	Long-chain-fatty-acid--CoA ligase ACSBG2	1836.6	1839	1815.6	2164.5	2394.2	2217.3	1850.4	1881.4	1853.8
CAFS_HM_T_00044883	1.22787	0.008951	Corticosteroid 11-beta-dehydrogenase isozyme 2	122.6	134.8	140.2	164.6	155.7	167.9	175.9	179.4	185.6
CAFS_HM_T_00076582	1.22759	0.017543	Glypican-1	193.5	192.5	194	247	238.6	226.4	177	188.9	172.7
CAFS_HM_T_00021182	1.22634	0.007024	Ammonium transporter Rh type B	67.2	75.1	68	86.6	82.5	88.8	79.7	91.5	88.8
CAFS_HM_T_00067599	1.22602	0.024248	Cytochrome P450 1A1	511.2	520.1	490.7	559.6	648.8	657.6	638	658.8	683.5
CAFS_HM_T_00028509	1.22462	0.000275	StAR-related lipid transfer protein 3	536.9	535	524.6	636.2	650.9	668	537	531.4	512
CAFS_HM_T_00081885	1.2216	0.028394	Carcinoembryonic antigen-related cell adhesion molecule 3	71.6	85.6	73.4	97.7	94.9	89.1	62.4	56.2	57.9
CAFS_HM_T_00051512	1.22022	0.049638	Choline-phosphate cytidylyltransferase B	95.9	96.2	96.7	113	112.1	127.3	104.9	114.2	116.7
CAFS_HM_T_00038982	1.21924	0.001432	Neuronal calcium sensor 1	246.2	254.2	251.3	304.3	294.7	317.5	361.5	356.8	359.8
CAFS_HM_T_00073708	1.21306	8.64e-05	Fibrinogen alpha chain	10454.6	10279.9	10626.8	12852.9	12524.6	12665.7	14755.4	14761.9	14573.5
CAFS_HM_T_00006756	1.2121	0.0012	Long-chain fatty acid transport protein 6	615.6	634.9	648.6	757.8	750.6	793.5	754.2	765.2	717.9
CAFS_HM_T_00075973	1.21067	0.016089	Interferon-induced protein 44-like	92.2	85.5	84.8	98.1	108.9	110.8	93.1	94.6	103.8
CAFS_HM_T_00004114	1.20914	0.002191	V-type proton ATPase subunit B, brain isoform	1080.9	1125.1	1060.2	1308.3	1365.5	1275.5	1106	1158.1	1061
CAFS_HM_T_00013438	1.20905	0.009974	Myosin regulatory light chain 2, skeletal muscle isoform	1301.7	1243.3	1318.1	1449.4	1615.9	1605.4	7362.3	5591.1	2999.6
CAFS_HM_T_00088603	1.20842	0.001664	Heat shock 70 kDa protein 13	734	739.1	689.8	866.6	852.5	894.6	834.5	855	845
CAFS_HM_T_00001199	1.20749	0.037741	UPF0562 protein C7orf55 homolog	91.4	100.9	90.6	124.6	110.4	106.6	98.3	103.2	93.1
CAFS_HM_T_00046902	1.20615	0.045538	Coiled-coil domain-containing protein 90A, mitochondrial	45.9	46.6	37.5	54.4	51.4	51	54.3	54.9	52.6
CAFS_HM_T_00064079	1.20573	0.010093	AP-3 complex subunit sigma-2	104.2	106.9	102.9	125.7	118.6	134.3	127.9	131.2	127.5
CAFS_HM_T_00033433	1.20464	0.001122	Influenza virus NS1A-binding protein homolog A	2736.7	2789.1	2656.4	3274.5	3197.1	3385	3084.2	3195.6	3011.2
CAFS_HM_T_00074004	1.20281	0.001024	Inositol-3-phosphate synthase 1-A	295.5	303.4	298.5	352.6	373.2	353.6	311.9	301.3	286.1
CAFS_HM_T_00011552	1.20235	0.001548	Homocysteine-responsive endoplasmic reticulum-resident ubiquitin-like domain member 1 protein	616.7	642.1	614.2	723	764.8	764.2	772.6	797.6	739.3
CAFS_HM_T_00063160	1.20186	0.001977	Hypoxanthine-guanine phosphoribosyltransferase	223.3	219.1	222.9	256.8	265.1	277.7	296	278.2	296.3
CAFS_HM_T_00078039	1.20141	0.000653	Cerebellin-3	856.6	852.4	906	1054.2	1052.4	1035.1	973.3	1020.7	945.3
Down-regulated
Protein	Fold Change	P.value	Annotation	ck_0h_1	ck_0h_2	ck_0h_3	hy_5h_1	hy_5h_2	hy_5h_3	re_5h_1	re_5h_2	re_5h_3
CAFS_HM_T_00071322	0.224685	2.24e-06	Nattectin	3520.3	3518.5	3581.4	856.2	863.9	666.1	613.1	647.1	670.4
CAFS_HM_T_00049915	0.234201	0.001339	Gastrotropin	15617.1	19717.4	15473.9	5648.2	3183	3068.2	2448.8	2469.3	2497
CAFS_HM_T_00001890	0.300296	1.65e-05	Uromodulin	967.4	1053.6	986.7	324.6	287.5	291.1	258.9	254	267.5
CAFS_HM_T_00078073	0.318426	7.54e-06	Erythroid membrane-associated protein	14552.2	14645.4	15273.6	5096.3	4823.2	4241.3	4010.2	4361.3	4292.1
CAFS_HM_T_00059115	0.357524	2.69e-05	Pentraxin fusion protein	1026	1108	1036.7	382.7	406.2	344.7	350.2	348.6	295
CAFS_HM_T_00003287	0.358681	0.002998	Bitisilin-3 (Fragment)	1901	1852.9	1461.6	646.9	789.5	434.3	304.4	294.5	328.5
CAFS_HM_T_00000627	0.373162	4.97e-05	NAD(P)(+)--arginine ADP-ribosyltransferase 2	2881.3	3064.1	2792.9	1145.9	1143.1	971.8	859.1	873.1	865.8
CAFS_HM_T_00063524	0.381958	0.015185	Papilin	1561.9	1534.5	1262.2	425.5	944.9	294.4	182.5	166.4	141.9
CAFS_HM_T_00049946	0.416491	0.001088	Mammalian ependymin-related protein 1	695	772.9	616.9	316.1	294.4	257.8	240	231.7	220.9
CAFS_HM_T_00051663	0.441396	1.2e-05	Complement factor B	762.3	762.2	739	351.9	341.2	306	302.9	325.7	294
CAFS_HM_T_00074738	0.449133	0.025459	Claudin-15	1776.7	1756.3	1477.1	569.6	1237.5	443.1	324.4	306.6	276.4
CAFS_HM_T_00009179	0.468278	0.000581	Ribonuclease-like 3	2992.4	2824.5	3337.7	1547.3	1406.9	1332.7	1428.9	1594.1	1459.6
CAFS_HM_T_00015695	0.471102	0.00702	--	4529	4500.9	3974.5	1827.8	2839.3	1459.3	964.5	928.4	865.2
CAFS_HM_T_00086375	0.473654	2.61e-05	Calcium-activated chloride channel regulator 4	572.2	586.6	611.9	292.3	282.3	264.1	250.8	256	258.3
CAFS_HM_T_00062644	0.478677	0.000122	Mucin-2 OS=Homo sapiens GN= PE=1 SV=2	601.4	615.1	633.6	334.5	276.4	274.7	240.9	244.4	236.6
CAFS_HM_T_00031462	0.483123	0.006538	Fatty acid-binding protein, brain	633.5	655	557.2	286.9	394.7	210.1	152.2	158.3	147.5
CAFS_HM_T_00000241	0.493404	0.016396	Calponin-1	8463.6	9304.7	7429.3	4018.3	5799	2615.3	1778.1	1730.8	1615.6
CAFS_HM_T_00070702	0.493771	0.001008	SAM domain and HD domain-containing protein 1	2533.4	2748.8	2311	1401.1	1214.3	1133.9	891.8	907.3	905
CAFS_HM_T_00037345	0.506337	0.010981	Four and a half LIM domains protein 1	3836.3	4088.9	3373	1888.6	2536	1296.1	938.7	909.7	851.1
CAFS_HM_T_00069919	0.514019	0.000128	Complement C3 (Fragment)	307	303.6	331	159.6	172.3	152.1	147.9	155.9	157.9
CAFS_HM_T_00072803	0.51437	0.010646	SAM domain and HD domain-containing protein 1	1470.9	1587.3	1353.8	680	1033.1	556.3	498.2	472.6	487
CAFS_HM_T_00045368	0.518865	7.01e-05	Prostaglandin reductase 1	1372	1419.7	1356.2	663.6	780.7	707.9	574	600	581.9
CAFS_HM_T_00050945	0.524959	0.000148	Vitelline membrane outer layer protein 1 homolog	286.1	283.2	276.1	141.3	165.8	136.7	140.8	128	130.4
CAFS_HM_T_00054528	0.52816	0.048934	VIP peptides	1573.4	1541.2	1510.7	745.7	1136.6	560.6	407.3	384	385
CAFS_HM_T_00064560	0.529901	0.01593	Tenascin	3866.8	4109.5	3394.7	1900	2733.5	1392	1117.4	1114.4	1040.7
CAFS_HM_T_00046550	0.536486	0.000472	Epidermis-type lipoxygenase 3	2768.3	2773.2	3108.3	1657.7	1533.1	1449.7	1579.1	1685.5	1646.2
CAFS_HM_T_00059585	0.545285	0.001708	Lysozyme-like protein 1	7167.1	6736	8184.8	4256	3956.2	3832	4078.1	4426.8	4679.8
CAFS_HM_T_00090259	0.545372	0.001772	Deleted in malignant brain tumors 1 protein	392.5	418.4	399.1	266.2	204.2	189.5	164.8	156.7	148.3
CAFS_HM_T_00071147	0.553388	0.008066	Sodium/potassium-transporting ATPase subunit alpha-1	5009.5	4722.1	4026.2	2392.9	3113.8	2106.7	1915.1	2003.9	1895.9
CAFS_HM_T_00084880	0.555551	0.031877	Cadherin-17	4202.5	4212.4	3578.6	1794.9	3232.8	1635.3	1306.4	1345.5	1201.7
CAFS_HM_T_00089830	0.560084	0.048344	Protein KIAA0284	360	374.6	313.1	173.4	293.7	119.7	90.7	84.3	74.8
CAFS_HM_T_00000672	0.561133	0.007505	Butyrophilin-like protein 3	329.4	348.8	295.9	181	224.3	141.3	126.1	133.6	129.8
CAFS_HM_T_00031182	0.561379	0.013753	Collagen alpha-1(XII) chain	21965.8	22904.2	19169.1	11948.1	15343.1	8659	7345	7179.5	7023.3
CAFS_HM_T_00023593	0.562665	0.005973	Collagen alpha-4(VI) chain	4212.4	4526.8	3945.8	2432	2876.8	1828.6	1690.6	1706.4	1636
CAFS_HM_T_00028679	0.565881	0.006123	Protein S100-A1	625.8	653.7	587.5	332.7	442.1	281.7	210.5	221.8	216.1
CAFS_HM_T_00063980	0.568303	0.000154	Olfactomedin-4	274.9	281.8	302.7	165.5	166.1	156.8	165.1	172.4	173.3
CAFS_HM_T_00031086	0.571033	0.000587	Cathepsin B	291	302	273.5	183.6	157.4	153.8	161	167.9	156.6
CAFS_HM_T_00023588	0.571921	0.006232	Collagen alpha-6(VI) chain	1445.2	1562.5	1374.9	822.8	1024.1	659.6	600.1	631.4	576.2
CAFS_HM_T_00055315	0.576179	0.001096	Acidic mammalian chitinase	3105.6	3144.3	2973.1	2063.4	1632.9	1617.8	1429.1	1446	1442.4
CAFS_HM_T_00006815	0.583981	0.029341	--	10752.9	11302.3	10011.6	5705.4	8688.1	4332.9	3178.2	3142.7	3015.6
CAFS_HM_T_00065868	0.584063	0.000155	--	1652.1	1686.6	1780.1	976.3	1062.5	950.9	981.7	918.1	879.5
CAFS_HM_T_00073456	0.584331	0.037094	CD48 antigen	91.4	119.7	97.8	59.3	61.5	59.7	157.4	168.1	193.2
CAFS_HM_T_00036108	0.58772	0.043202	PDZ and LIM domain protein 3	2893.6	3050	2662.2	1590.4	2402.2	1065.2	757.9	701.1	682
CAFS_HM_T_00038174	0.588366	0.024164	AMP deaminase 1	134	160.4	156	81.1	118	65.9	64.2	59.9	54.4
CAFS_HM_T_00036138	0.593351	0.030028	Transforming growth factor-beta-induced protein ig-h3	5586.2	5923.3	5134.1	3269.4	4420.1	2186	1756.6	1723.2	1642.1
CAFS_HM_T_00092100	0.599647	0.004789	Cathepsin L1	20.6	16.8	19.3	12.8	10.5	10.7	9.4	12	12.3
CAFS_HM_T_00009159	0.60073	6.4e-05	--	995.3	936.1	1001.7	587	601.7	573.3	750.3	772.9	822.6
CAFS_HM_T_00041460	0.600833	0.001244	--	264.1	237.3	242.9	149.5	133.2	164.5	139.9	139.8	136.6
CAFS_HM_T_00044782	0.604672	0.000159	Low choriolytic enzyme	646.1	659.2	706.7	412	394.7	409.9	380.5	399.8	405.8
CAFS_HM_T_00061908	0.610113	0.026973	Harmonin	500.5	511.5	457.4	273.8	401.4	221.3	167.5	169.2	158.1
CAFS_HM_T_00004034	0.610732	0.000178	Myeloperoxidase	6679	6702.3	6881.1	4477.3	4048	3849.6	3832.1	4101	4267
CAFS_HM_T_00088352	0.620576	0.00035	--	611.2	672.9	651.2	419.2	403.6	378.2	391.1	426.8	394.4
CAFS_HM_T_00076598	0.622305	0.022751	Apoptosis-associated speck-like protein containing a CARD	727.8	734.5	638.6	379.3	568.6	359.5	280	279.6	279.8
CAFS_HM_T_00037535	0.625028	0.001659	Glucosamine-6-phosphate isomerase 1	2671.5	2823.6	2450.3	1675	1774.2	1516.9	1336.2	1277.1	1272.6
CAFS_HM_T_00046226	0.625291	0.000129	Histone H1	220.2	238.9	227.3	147.5	141.2	140.5	153	157.6	168.2
CAFS_HM_T_00036396	0.626855	0.001482	ES1 protein homolog, mitochondrial	5855.4	5645.1	5092.5	3511.1	3680.1	3210.2	2891.8	3178.3	2930.3
CAFS_HM_T_00045157	0.632	0.003844	Annexin A2-B	2325.4	2347.6	2089.5	1331.5	1644.6	1297.8	1276.1	1369.8	1236.4
CAFS_HM_T_00014424	0.634212	0.000679	Metalloproteinase inhibitor 2	714	710.6	738.4	509.8	431.8	430.2	331.5	345	366.3
CAFS_HM_T_00064123	0.634979	0.01636	Mucin-2	3546.5	3743.8	3377.3	2439.9	2676.9	1656.9	1127	1091	1041.2
CAFS_HM_T_00081886	0.638037	0.012474	Epidermis-type lipoxygenase 3	446.8	445.1	504.1	298	293.5	299.2	277	291.2	282.7
CAFS_HM_T_00017150	0.647909	0.016776	Myosin-VIIa	1259.1	1369.9	1136.5	804.5	971.9	663.3	534.4	531.9	504.4
CAFS_HM_T_00006239	0.649495	0.026076	Deoxyribonuclease gamma	857.8	872.1	735.4	487.9	673.7	439.6	348.9	366.4	357
CAFS_HM_T_00040682	0.653589	0.001262	N-acylglucosamine 2-epimerase	1153.2	1225.4	1082.9	788.8	773.2	700.4	675.4	691.8	638.9
CAFS_HM_T_00073455	0.653625	0.000832	--	113.2	120.6	113.8	68.3	80.4	78.5	63.4	65.5	52.2
CAFS_HM_T_00021542	0.654786	7.23e-05	Alcohol dehydrogenase 1	2081.1	2101.6	2189	1406	1336.1	1430	2802.6	2704.9	2706.8
CAFS_HM_T_00074898	0.655056	0.028208	Plastin-1	26.5	34.9	27.6	21.1	20.8	16.4	16.5	13.6	15.2
CAFS_HM_T_00002920	0.657754	0.001397	DLA class II histocompatibility antigen, DR-1 beta chain	1128.6	1039.4	1063.3	721.6	767.4	636.4	439.1	517.1	471
CAFS_HM_T_00019321	0.66463	0.011784	Intermediate filament protein ON3	5422.8	5616.3	4948.3	3594.4	4129.7	2901.6	1561.3	1703.5	1507.7
CAFS_HM_T_00013573	0.672708	0.005727	Coronin-1C	2330.7	2412	2374.8	1581	1849.3	1357.7	1090.9	1159.3	1110.2
CAFS_HM_T_00050943	0.675458	0.000134	Vitelline membrane outer layer protein 1	930.3	965.1	978.5	641.8	677.1	622.3	705.3	687.9	670.6
CAFS_HM_T_00043988	0.675876	0.000642	--	557.8	609.5	562.9	406.8	391	371.6	391	387.4	334.8
CAFS_HM_T_00053536	0.67603	0.000429	Acidic mammalian chitinase	588.5	586.2	626.7	426.8	383.5	407.5	382.9	400.7	388
CAFS_HM_T_00020682	0.676748	0.000604	Cystatin	1196	1172.4	1172.8	874.4	769.3	752.8	681.7	709.3	699.6
CAFS_HM_T_00015421	0.68351	0.009109	Ferritin, middle subunit	11654.2	9643.5	10550.7	6462.4	7819.5	7486.8	7397.2	7054.2	7501.7
CAFS_HM_T_00057072	0.684674	0.023971	Zinc-binding protein A33	78.3	76.5	95.1	51.2	65.8	54.1	41.8	47.8	47.5
CAFS_HM_T_00009810	0.684982	0.010034	Isocitrate dehydrogenase [NADP], mitochondrial	9242.6	9244	8580.7	6081	7225.7	5233.9	4669.5	4572.3	4613.6
CAFS_HM_T_00087865	0.685529	0.002367	Periostin	1946.8	1944.3	1831.2	1422.4	1343.5	1156.9	1143.6	1114.4	1127.2
CAFS_HM_T_00080753	0.686489	0.045018	Collagen alpha-3(VI) chain	7644.2	7710.3	6982.2	5147.6	6437.7	3748.6	3033.6	3036.5	2900.9
CAFS_HM_T_00008287	0.686755	0.009678	Keratin, type I cytoskeletal 17	1256.9	1321.7	1204.7	779.8	1021.7	796.7	654.2	643.2	634
CAFS_HM_T_00067068	0.68871	0.029223	Dehydrogenase/reductase SDR family member 11	331.5	355.3	309.7	208.6	284.4	193.3	152.7	162.7	161.8
CAFS_HM_T_00052904	0.691102	0.000694	Bifunctional protein NCOAT	5381.8	5617.5	5179.2	3673.6	3960.1	3547.3	3555.2	3543.3	3621.3
CAFS_HM_T_00044638	0.693266	0.002975	Neutrophil cytosol factor 2	206.1	235	216.8	164.3	145.9	145.9	122.4	140.1	132.7
CAFS_HM_T_00070745	0.697897	2.48e-05	Caspase-1	213.7	216.1	217	145.1	154.4	151.9	128.1	138.6	143.1
CAFS_HM_T_00038844	0.699413	0.001303	Matrix metalloproteinase-9	5334.7	5405.2	5591.5	4184.9	3619.7	3617.8	3650.5	4063.5	3629.3
CAFS_HM_T_00052731	0.702808	0.000203	Acyl-coenzyme A thioesterase 8	518.8	547.7	557.7	372.2	385.7	383.6	374.4	392.6	392.3
CAFS_HM_T_00067712	0.707044	0.024368	--	713.1	714.2	598.6	546	482.2	404.2	282.8	323.4	276
CAFS_HM_T_00085124	0.70826	0.018178	Apoptosis-associated speck-like protein containing a CARD	174.8	173.6	166.1	113.5	146.3	104.6	98	103.1	95.8
CAFS_HM_T_00078382	0.708831	0.000257	Death-associated protein-like 1-B	308.2	300.9	312.7	222.1	226.2	205.1	204.2	241.2	225
CAFS_HM_T_00009924	0.709124	0.02191	Aminopeptidase N	436.2	459.5	380.1	298.2	345.5	261	243.5	243.6	231.8
CAFS_HM_T_00030303	0.710852	0.006005	Keratin, type I cytoskeletal 50 kDa	3633.8	3591.2	3212.9	2422	2726.1	2271.7	1563.4	1706.1	1447.1
CAFS_HM_T_00040549	0.712707	0.004095	Testis-specific Y-encoded-like protein 1	17.7	19.2	17.4	11.6	13.2	13.9	16.4	15.3	14.3
CAFS_HM_T_00062604	0.714344	0.026069	Galanin	626.5	673.7	651.8	566.2	393.1	435.1	249.7	306.4	313.9
CAFS_HM_T_00003950	0.715416	0.032012	GTP:AMP phosphotransferase, mitochondrial	1867	1928.6	1753.2	1256.4	1618.3	1095	853	891.4	843.9
CAFS_HM_T_00085027	0.716649	0.007376	--	3830.5	3875.8	4016.6	3225	2622.9	2553.3	2159.8	2288.1	2069.1
CAFS_HM_T_00076236	0.718737	0.00285	Macrophage mannose receptor 1-like protein 1	295.4	327	337.2	239.3	230.6	219.8	226.7	222.1	228
CAFS_HM_T_00021595	0.719946	0.004224	Kinesin light chain 4	134	117.5	119.5	83.7	93.2	90.2	96.7	94.5	102.4
CAFS_HM_T_00047867	0.720951	0.0015	Pro-interleukin-16	1138.8	1094.8	1079.8	823.3	839.9	725.6	655.7	714.8	685.7
CAFS_HM_T_00062638	0.728689	0.015352	Intestinal mucin-like protein (Fragment)	1563.3	1621.3	1605.1	1284	1252.6	953.6	714.9	708.5	701.9
CAFS_HM_T_00065858	0.730228	0.040585	Ependymin	789.3	810.5	1006.1	701.6	572	629.3	587.8	559.2	561.5
CAFS_HM_T_00043946	0.732378	0.040758	Actin, aortic smooth muscle	2767.7	2923.1	2712.1	2006.3	2493.9	1653.9	1461	1412.8	1375.6
CAFS_HM_T_00047854	0.732693	0.011175	Ferritin, heavy subunit	3821.3	3198	3583.5	2371.6	2686.3	2710.7	3258.3	3132.8	3356.7
CAFS_HM_T_00024622	0.733379	0.002255	Beta-2-microglobulin	1313.3	1297.8	1212.3	933.9	1000	870.1	747.1	787.5	733.8
CAFS_HM_T_00051893	0.736501	0.021139	Sialidase-3	207	228.8	243.9	190.1	149	161.5	121.5	183.7	155.3
CAFS_HM_T_00064486	0.738745	0.000445	Ubiquitin carboxyl-terminal hydrolase 47	49.1	49.5	48	37.8	34	36.5	36.1	37.1	32.7
CAFS_HM_T_00053251	0.738995	0.044575	Collagen alpha-1(VI) chain	11110.9	11377.9	10569.2	8295	9736.1	6398.6	5307.7	5445.2	5169.4
CAFS_HM_T_00081131	0.740108	0.001801	--	685.5	685.1	661.4	468.1	544.2	491.6	398	433.6	440.8
CAFS_HM_T_00078933	0.740122	0.008455	Integral membrane protein 2B	179.9	171.5	187.7	147.8	132.7	118.5	136.5	141	126.6
CAFS_HM_T_00055270	0.741456	0.017339	Aminopeptidase B	3512.7	3836.5	3269.1	2614.3	2917.3	2341.4	2431.4	2590.6	2419.9
CAFS_HM_T_00015520	0.742558	0.015058	Ras-related C3 botulinum toxin substrate 2	730.5	751.2	721.9	555	619	462.3	465.9	426.1	422.2
CAFS_HM_T_00064844	0.743985	0.006693	Polyubiquitin	74.5	67.2	78.6	57.4	54.1	52.4	64.4	60.6	61.1
CAFS_HM_T_00012823	0.745855	0.01361	Ankyrin repeat and SAM domain-containing protein 4B	577.6	588.2	535.2	437.1	466.6	365	335.6	317.5	311.4
CAFS_HM_T_00063446	0.746006	0.037203	--	1990.7	2038.7	1929.4	1430	1783.1	1232.2	1420.3	1835	1252.7
CAFS_HM_T_00045016	0.747753	0.041615	CD81 antigen	1239.3	1248.7	1250.8	960.5	1030.1	805.1	608.6	671.4	643.2
CAFS_HM_T_00080171	0.748828	0.027087	Plastin-2	7737.7	7661.2	7788.4	5813.9	6352.4	5197	4478.4	4604.9	4490
CAFS_HM_T_00000778	0.748978	0.0059	Protein NLRC3	566.3	575.9	521	422.6	445.2	377.9	355.6	365.1	354.4
CAFS_HM_T_00076108	0.750808	0.002512	Protein NLRC3	145.7	146.8	140.5	106.9	117.6	100.6	97.3	84.4	86.2
CAFS_HM_T_00083577	0.751155	0.001355	Leukocyte elastase inhibitor	596.3	574.1	625.9	459.2	462.7	427.4	427.3	442.2	432.8
CAFS_HM_T_00064380	0.752154	0.002389	Ferritin, heavy subunit	1196.1	1085.6	1072.4	824.9	859.7	838.2	982.9	961.7	967
CAFS_HM_T_00053257	0.752213	0.036695	Collagen alpha-2(VI) chain	14019	14170.9	13392.6	10386.9	12328.3	8563.7	7304.2	7503.3	7282.4
CAFS_HM_T_00004821	0.752382	8.21e-05	Collagenase 3 (Fragment)	1828	1821.7	1882.2	1398.1	1348.1	1415.9	1517.8	1584	1503.3
CAFS_HM_T_00017636	0.755992	0.001017	Glutathione peroxidase 1	1363.1	1335.4	1265.3	980.7	1046.1	969.8	882.7	936.2	876.4
CAFS_HM_T_00005300	0.756908	0.009397	Protein shisa-4	420.6	487.2	431.2	358.7	326.9	327.9	279.9	303.3	304.7
CAFS_HM_T_00024484	0.757706	0.042719	Lumican	5159.2	5063.6	4917.5	3945.9	4467.1	3058.9	2362.1	2436.9	2472.3
CAFS_HM_T_00051668	0.758328	0.000443	Complement factor B	647.5	660.6	661.1	524.8	492	476.5	470.1	480.6	463.1
CAFS_HM_T_00002918	0.759372	0.005826	HLA class II histocompatibility antigen, DP alpha 1 chain	1332.1	1176.2	1340.8	1014.8	965.2	942.9	741.7	737.5	726.4
CAFS_HM_T_00055319	0.759539	0.001396	Acidic mammalian chitinase	1629.6	1603.4	1602.3	1303.7	1232	1136.9	1044.6	1129.1	1095
CAFS_HM_T_00008641	0.761126	0.001555	Lipoprotein lipase	3173.1	3117.4	3048.3	2545.9	2250.7	2311.4	2212.7	2140.4	2234.3
CAFS_HM_T_00071290	0.762075	0.005189	Fascin	594.4	640.5	616.1	516	448.3	446.3	393.7	391.1	414.2
CAFS_HM_T_00069923	0.762382	0.000386	Complement C3 (Fragment)	267.6	274	286.2	214	205.9	211.2	210.5	204.2	206
CAFS_HM_T_00001516	0.76678	0.003515	Guanylate-binding protein 3	844.2	795.5	802.2	676.3	587.7	608.4	670.6	600.6	573.2
CAFS_HM_T_00084818	0.768788	0.000268	--	661.7	662.8	654.2	531.5	492.1	497.6	422.7	453.8	428.3
CAFS_HM_T_00084575	0.773734	0.005713	SH3 domain-containing kinase-binding protein 1	203.8	218.5	196	156	170.4	152	121.3	134.5	130
CAFS_HM_T_00089128	0.774086	0.001527	Glia maturation factor gamma	1035	1023.1	1086.9	807	854.6	772.9	656.9	662.4	657.3
CAFS_HM_T_00078503	0.774117	0.001167	Integrin beta-2	1837.3	1958.2	1949.5	1448.5	1552.3	1446.5	1310	1334.8	1397
CAFS_HM_T_00074324	0.775941	0.007885	6-phosphofructokinase type C	544.7	544.6	501.8	403.1	448.6	382.9	350.3	347	340.5
CAFS_HM_T_00028635	0.776649	0.006859	--	1032.7	1029.8	970.4	806.7	839.5	709.3	568.5	623.4	586.6
CAFS_HM_T_00001018	0.777802	0.000346	--	604.9	606.4	619.5	489.8	481	453.2	441.1	454.4	469.8
CAFS_HM_T_00011371	0.778035	0.033394	C-factor	1667.3	1803.9	1583.2	1317.5	1477.6	1137.4	1100.6	1017	1149.5
CAFS_HM_T_00000608	0.778062	0.000378	Ig lambda chain C region	586.7	582.2	588.8	475.9	455.9	435.8	424.6	431	411
CAFS_HM_T_00022042	0.778352	0.001154	Nuclear receptor coactivator 4	1162.7	1076.9	1164	873.3	874	901.9	893.3	982.1	941.3
CAFS_HM_T_00060165	0.778427	0.021354	Ferritin, lower subunit	561.1	461	500.2	400	376.7	408.3	447.7	407.3	456
CAFS_HM_T_00047193	0.779192	0.00071	Intelectin-1	376.6	394.5	375.6	310.9	291.6	291	274.2	282.1	268.3
CAFS_HM_T_00086369	0.779221	0.003634	Calcium-activated chloride channel regulator 4	109.8	117.3	111.7	83.6	94.7	85.7	90.5	97.3	87.5
CAFS_HM_T_00056473	0.780184	0.005276	Alpha-enolase	2194.1	2205.2	2149.8	1715.4	1844.5	1549.6	1272.4	1300.8	1305.8
CAFS_HM_T_00027003	0.780684	0.032958	CD9 antigen	786.6	802.8	796.2	588.5	687.9	586	554.1	607	614.9
CAFS_HM_T_00075145	0.780882	0.001728	Glutamine synthetase	683.9	709	654.4	557.4	523.7	517.6	504.7	492.6	476.9
CAFS_HM_T_00052040	0.784148	0.022723	Guanine nucleotide exchange factor VAV2	67.9	62.8	69.9	50.3	59.1	47.9	40.7	35.3	43.5
CAFS_HM_T_00080243	0.785064	0.007485	Dipeptidyl peptidase 4	68.9	78.4	72.3	57.3	60.1	55	56.3	55.8	55.8
CAFS_HM_T_00052401	0.7874	0.031391	Collagen alpha-1(V) chain	648.2	617.8	627.7	485.8	571.8	433.5	336.5	377.3	369.1
CAFS_HM_T_00017194	0.788323	0.006718	Sodium/potassium-transporting ATPase subunit beta-233	4312.1	4124.6	4009.6	3096.5	3560.1	3155.1	3226.8	3276.2	3182.1
CAFS_HM_T_00084032	0.788899	0.008891	Plasma glutamate carboxypeptidase	202.8	177.3	187.4	144	156.9	146.8	146.9	149.5	147.9
CAFS_HM_T_00028574	0.788982	0.019217	Patr class I histocompatibility antigen, A-2 alpha chain	70.2	75.2	68.8	49.8	57.6	61.6	60.7	48.3	50.9
CAFS_HM_T_00023359	0.789012	0.001015	Complement factor D	800.5	780.9	823	662.4	610.6	624.1	600.9	620.3	629.9
CAFS_HM_T_00005419	0.792319	0.002298	Receptor-type tyrosine-protein phosphatase C	373	397.6	367.2	304.9	309	287.6	255.3	242.4	232.1
CAFS_HM_T_00057166	0.79258	0.00059	Extracellular peptidase inhibitor (Fragment)	646.8	693.9	675.5	527	532.3	538.7	441.9	529	447.6
CAFS_HM_T_00056333	0.793705	0.00012	Acidic mammalian chitinase	887.2	895.2	911.8	714.3	729.6	694.5	667.1	704.1	694.8
CAFS_HM_T_00017220	0.793789	0.0421	Prothymosin alpha-A	198.5	182.1	228	164.6	151.9	166.6	158.9	175	229.6
CAFS_HM_T_00045124	0.7943	0.008122	Retinal dehydrogenase 2	5478.7	5555.4	5330.5	4274.3	4739.6	3984.5	3320.1	3232.2	3176.6
CAFS_HM_T_00049725	0.795074	0.000645	Vitronectin	3256.2	3140.6	3210.1	2640.5	2437.2	2560.5	2451.7	2601.2	2630.5
CAFS_HM_T_00003104	0.79509	0.020474	Brain-specific angiogenesis inhibitor 1-associated protein 2-like protein 2	1201.6	1191.5	1195.3	935.9	1019.8	897.4	905.4	955.6	945.2
CAFS_HM_T_00025760	0.795098	0.011552	--	363.8	380.4	365.6	323.4	292.1	266.9	240	254.2	238.2
CAFS_HM_T_00064041	0.795108	0.002427	Olfactomedin-4	916.1	970.5	889.5	759	738.8	709.5	603.4	708.3	581.9
CAFS_HM_T_00089247	0.795662	0.01207	Nuclear factor 7, ovary	415.5	448.7	403.8	353.7	347.8	307.4	312	321.4	322.2
CAFS_HM_T_00088675	0.796875	0.000702	Ras-related protein Rab-1A	99	100.7	94.7	78.3	80.1	76.2	91.8	102.7	100.4
CAFS_HM_T_00019361	0.796875	0.03169	Integrin beta-7	23.5	26.9	26.4	19	22.8	19.4	18.7	18	20.2
CAFS_HM_T_00063121	0.797563	0.011653	Histone H1	564.8	591.4	591.5	455.3	512.3	426.3	429.2	451.2	449
CAFS_HM_T_00091530	0.799606	0.026903	Kunitz-type protease inhibitor 1	584.8	600.2	540.6	446.4	514.9	418.5	356.2	395.2	335.4
CAFS_HM_T_00048762	0.802016	0.010504	Astrocytic phosphoprotein PEA-15	321.3	353.2	327.6	255.9	289.5	258.3	201.4	211.1	203.4
CAFS_HM_T_00017743	0.802191	0.00027	Protein-arginine deiminase type-2	859	848	866.7	681.3	670	713.3	591.3	678.2	640.2
CAFS_HM_T_00090784	0.802381	0.014951	14-3-3 protein zeta/delta	4149.1	4089.9	3993.6	3209.7	3630.3	2975.2	2692.1	2737.8	2740.3
CAFS_HM_T_00000117	0.80366	0.003987	--	2258.2	2229.7	2386.4	1956.8	1797.4	1770.4	2335.7	2261.4	2216.3
CAFS_HM_T_00089300	0.804971	0.002264	Olfactomedin-4	261.7	276	275	225.7	222.4	206.1	202.9	190.3	196.9
CAFS_HM_T_00044281	0.80567	0.008593	Glucose-6-phosphatase	358	364	371.5	293.6	269.1	318.3	288.7	297.1	323.6
CAFS_HM_T_00008082	0.806172	0.004533	--	143	157.1	150.3	121.3	126.1	115.7	108.7	114.7	108.1
CAFS_HM_T_00031650	0.806829	0.0337	Calcium-binding mitochondrial carrier protein SCaMC-1	1089.3	1081.3	1004.3	827.2	965.7	768.7	655.9	645.5	626.8
CAFS_HM_T_00069924	0.807484	0.00074	Complement C3 (Fragment)	408.1	409.9	400.6	336.1	312.2	335.7	314.4	341	289.5
CAFS_HM_T_00058095	0.810542	0.027546	Basement membrane-specific heparan sulfate proteoglycan core protein	12692.5	13191.8	12152.6	10590.5	11198.4	9041.6	8206.5	8322.1	7921.1
CAFS_HM_T_00048297	0.810667	0.000393	N-acetyl-D-glucosamine kinase	1285.7	1226	1221.4	1006.4	1019.7	1000.2	1031.5	1056.1	1070.3
CAFS_HM_T_00065779	0.811479	0.022852	Non-specific cytotoxic cell receptor protein 1 homolog	2831.9	2838.8	2809.5	2329.8	2417.7	2134	1985.7	2055.8	2055.1
CAFS_HM_T_00064966	0.812054	7.02e-05	Disabled homolog 2	1268.7	1275	1265.9	1046.5	1003.7	1043.4	886.7	996.1	999.8
CAFS_HM_T_00069222	0.812917	0.000165	--	2317.6	2274.2	2292.3	1901.3	1808.6	1886.3	2221.8	2211.8	2357.1
CAFS_HM_T_00063768	0.814091	0.023145	Lactadherin	456.1	473.3	426.1	404	359.7	339.8	346.3	330.8	323.3
CAFS_HM_T_00059106	0.816009	0.011721	Pentraxin fusion protein	117.3	127.4	115.1	101.6	91.3	100.7	106.1	106.3	118
CAFS_HM_T_00085126	0.816601	0.013779	Caspase-1	350.4	318.2	366.3	271.4	288.6	285.1	271.7	246.9	294.3
CAFS_HM_T_00013316	0.818099	0.003696	Ig mu chain C region membrane-bound form	726.7	681.9	681	575.8	591.2	542.5	451.1	437.7	410.6
CAFS_HM_T_00022151	0.818321	0.019083	Ribonuclease T2	540.2	474.1	552.2	415.9	431.5	434.5	478.2	489.7	495.7
CAFS_HM_T_00076980	0.818469	0.011059	PDZ domain-containing protein GIPC1	618.9	644.5	603.5	492	553.5	482.5	428.2	437.5	430
CAFS_HM_T_00000074	0.818736	0.011612	Cytoglobin-1	1539.8	1547.5	1471.8	1274.2	1325.7	1132.8	955.5	1060.5	942.1
CAFS_HM_T_00001714	0.819323	0.009716	von Willebrand factor A domain-containing protein 5A	178.9	162.2	160.9	132.8	142.8	135.7	125.4	125.1	113.8
CAFS_HM_T_00009168	0.819368	0.000479	--	131.3	135.5	131.8	105.3	109.6	111.7	102.7	99.3	93.2
CAFS_HM_T_00034508	0.819874	0.001706	Cytosolic 5&apos;-nucleotidase 1A	916.9	910.7	863.3	736.4	758.1	711.7	636.4	635.6	623.6
CAFS_HM_T_00085198	0.820081	0.034656	--	617.8	648.8	643.7	591.5	497.6	477.5	463.1	469.9	467.8
CAFS_HM_T_00006578	0.820457	0.019045	Kinesin light chain 4	350.5	371.5	340.7	288.6	315.9	267.4	244.5	239.1	259.1
CAFS_HM_T_00035741	0.821705	0.000361	Glutathione reductase, mitochondrial	3760.9	3617.8	3644.6	3020.8	2951.7	3085.4	3069.9	3075.9	3076.1
CAFS_HM_T_00079799	0.822176	0.001052	Immunoglobulin superfamily member 3	500.5	500	529.1	419.6	427	411	337.2	348.2	341.1
CAFS_HM_T_00068710	0.822748	0.001729	Endothelial differentiation-related factor 1 homolog	921.1	944.3	921.6	785.1	785	722.9	710.1	724.1	720.2
CAFS_HM_T_00046641	0.824431	0.02444	Cadherin-1	458.1	461.3	456.7	375.2	357.1	402.2	422.1	405.6	371.9
CAFS_HM_T_00092009	0.824919	0.000764	Apolipoprotein B-100	15219.8	15091.8	14926.3	12949.8	12016.9	12350.9	14334.1	14332.3	14390.3
CAFS_HM_T_00086469	0.825131	0.001075	CD166 antigen homolog A	1378.7	1402.5	1388.2	1117.9	1202.6	1119.8	1104	1085	1075.3
CAFS_HM_T_00086286	0.82617	0.018816	High mobility group-T protein	603.6	605.3	566.4	474.2	535.4	457.1	424.6	437.6	413.8
CAFS_HM_T_00021076	0.82621	0.018955	Hexokinase-1	3379.5	3366.2	3258.9	2794.4	2988.6	2482.9	2251.8	2343.9	2251.4
CAFS_HM_T_00061581	0.826889	0.00187	Oncoprotein-induced transcript 3 protein	490	494.1	474.5	418.1	403.9	384.1	294.5	327.6	324.5
CAFS_HM_T_00085560	0.827899	0.024937	Pre-B-cell leukemia transcription factor 2	226.6	210.1	225.7	181.9	199.6	166.9	148.7	169	156.2
CAFS_HM_T_00071251	0.827982	0.003973	Gamma-glutamylaminecyclotransferase A	882.3	839.8	872.4	673.4	740.2	734.6	752.3	775.8	770.5
CAFS_HM_T_00024547	0.828088	0.015324	Aldose reductase	3065	3088.8	2950.3	2539.6	2708.2	2291.2	2145.2	2175.2	2076.2
CAFS_HM_T_00064077	0.829357	0.000838	Aminopeptidase N	3596.3	3558.3	3540.8	3043.9	2997.8	2828.6	2710.6	2845.5	2762
CAFS_HM_T_00051403	0.830077	0.036625	Lissencephaly-1 homolog B	2457.6	2086.3	2442.2	2009.3	1922.2	1867.5	1774.7	1776.7	1757.1
CAFS_HM_T_00029106	0.830943	0.004254	14-3-3 protein zeta	2819.5	2743.9	2706	2309.5	2405.1	2156.8	1917.3	1910.4	1902
CAFS_HM_T_00051455	0.831014	0.020078	Fructose-bisphosphate aldolase C	650.7	662.5	619.5	547.9	573	485.2	429.8	461.9	447.8
CAFS_HM_T_00060369	0.831494	0.013302	6-phosphofructokinase type C	234.6	227	236.3	185.6	211	183.7	175.6	167.6	175
CAFS_HM_T_00056078	0.832161	0.013276	von Willebrand factor A domain-containing protein 1	519	544.5	485.6	431.8	448.1	409.2	386.4	388.3	374.6
CAFS_HM_T_00090494	0.83219	0.003116	Spectrin beta chain, brain 4	687.2	713.9	698.9	582	611.8	553.8	529.1	513.5	493.4

## Sheet: re_5h vs hy_5h
Table S6. The differentially abundant proteins (DAPs) in liver among three groups.
DAPs in re_5h vs hy_5h
Up-regulated
Protein	Fold Change	P.value	Annotation	ck_0h_1	ck_0h_2	ck_0h_3	hy_5h_1	hy_5h_2	hy_5h_3	re_5h_1	re_5h_2	re_5h_3
CAFS_HM_T_00073456	2.87368	0.008534	CD48 antigen	91.4	119.7	97.8	59.3	61.5	59.7	157.4	168.1	193.2
CAFS_HM_T_00074105	2.11964	0.004299	Ubiquitin-60S ribosomal protein L40	13.6	14.6	12.2	12.7	13.7	17.9	27.1	31.6	35.2
CAFS_HM_T_00046281	2.04553	0.045409	Alpha-actinin-3	361.5	354.5	372	519.7	377.5	376.6	1057.8	969	578.8
CAFS_HM_T_00021542	1.96886	6.08e-06	Alcohol dehydrogenase 1	2081.1	2101.6	2189	1406	1336.1	1430	2802.6	2704.9	2706.8
CAFS_HM_T_00086047	1.6163	0.000626	Ubiquitin carboxyl-terminal hydrolase 16	471	509	463.6	485.6	505.1	477.9	749.2	849.2	775.3
CAFS_HM_T_00034910	1.46254	0.000202	--	92.5	81.9	90.7	88.2	80.9	83.2	125.6	124.5	118.9
CAFS_HM_T_00052769	1.45711	0.002736	Cerebellin-3	445	394.2	446.2	383.1	403.4	450.4	564.2	603.1	635
CAFS_HM_T_00018176	1.44229	0.00179	Heme oxygenase-1	980.4	995.5	960	1432.4	1437	1492.9	1948.6	2100.6	2242.5
CAFS_HM_T_00087294	1.43042	0.004853	--	565.4	573.1	596.1	544.4	567.6	498.3	714.3	835	754.1
CAFS_HM_T_00014341	1.40333	0.006332	Patched domain-containing protein 3	241.7	223.9	243.6	185.9	200	208.9	283.5	252.3	298.9
CAFS_HM_T_00028571	1.3966	0.001597	Major histocompatibility complex class I-related gene protein	193.7	180.8	175.3	179.8	205.8	179.2	259	258.1	271.7
CAFS_HM_T_00077829	1.37982	0.004999	--	498.6	485.3	520.3	467.6	472.8	510.8	641.9	633.5	727
CAFS_HM_T_00044034	1.35769	0.002214	60S ribosomal protein L19	116.8	107.8	112.9	107.1	122.9	110.8	148	155.3	159.4
CAFS_HM_T_00025587	1.35054	0.000173	--	467.5	455.7	465.3	378.8	399.8	397.6	542.1	530.8	515.6
CAFS_HM_T_00009159	1.33133	0.001047	--	995.3	936.1	1001.7	587	601.7	573.3	750.3	772.9	822.6
CAFS_HM_T_00025482	1.32258	0.000166	N(4)-(beta-N-acetylglucosaminyl)-L-asparaginase	271.8	282.6	249	264.3	258.3	276.9	348.8	358.6	350
CAFS_HM_T_00014752	1.32188	0.00319	Mitogen-activated protein kinase kinase kinase A	96.7	99.8	92.5	86.6	80.8	79.9	115.6	103.1	108.2
CAFS_HM_T_00012202	1.31944	0.000682	Transcription factor 25	333.5	343.4	328.7	341.6	341.2	348.7	438.4	475.7	446.9
CAFS_HM_T_00033513	1.31911	0.018428	Sestrin-1	17.8	15.5	18.4	17.8	19.4	21.4	28.2	25	24.1
CAFS_HM_T_00063299	1.31754	0.01455	Cytosolic 5&apos;-nucleotidase 1A	286.9	294.2	300.6	290.1	317.8	331.5	372.5	442.3	422.9
CAFS_HM_T_00045311	1.31354	0.004502	Bcl2 antagonist of cell death	344.5	355.1	357.5	309.2	346	363.8	453	457.4	428.1
CAFS_HM_T_00086274	1.29475	0.001835	Complement C4-B	295.5	277.5	269	262.7	246.7	241.4	318.7	314.1	339.3
CAFS_HM_T_00008161	1.29405	0.000124	Sushi, von Willebrand factor type A, EGF and pentraxin domain-containing protein 1	1178.2	1108.1	1198.3	1128.9	1111.2	1182.8	1490.9	1465.5	1473
CAFS_HM_T_00051130	1.28977	0.031636	Steroid receptor RNA activator 1	116.2	125.8	120.7	116.4	126.1	145.4	182.3	157.6	160.4
CAFS_HM_T_00037168	1.28314	0.002316	Tryptophan 2,3-dioxygenase A	1219.4	1217.9	1216.6	1282.6	1359.9	1448.1	1707.9	1735.3	1805.6
CAFS_HM_T_00054628	1.28039	0.000732	GTPase IMAP family member 8	1408	1391.1	1277.7	1223.3	1136.4	1160.4	1477.9	1550.1	1479.1
CAFS_HM_T_00021080	1.26728	0.005488	Tetraspanin-15	297.6	290.6	293.4	247	272.2	246.3	315.6	312.9	341.6
CAFS_HM_T_00088675	1.25703	0.004572	Ras-related protein Rab-1A	99	100.7	94.7	78.3	80.1	76.2	91.8	102.7	100.4
CAFS_HM_T_00047854	1.25477	0.006534	Ferritin, heavy subunit	3821.3	3198	3583.5	2371.6	2686.3	2710.7	3258.3	3132.8	3356.7
CAFS_HM_T_00045502	1.25271	0.002872	--	2663.3	2588.1	2724.2	2644.9	2327.1	2569.5	3174.9	3158.2	3114.2
CAFS_HM_T_00006254	1.24561	0.006336	--	209.2	218.3	208.9	182.9	187.1	171.5	220.2	238.7	215.6
CAFS_HM_T_00041056	1.24178	0.020363	Gamma-glutamyl hydrolase	1375.9	1331.2	1360.4	1079.8	1134.4	1224.9	1410.4	1427.6	1432.6
CAFS_HM_T_00023807	1.24033	0.013208	Complement C1q-like protein 4	892.1	864	881.2	895.1	813.1	768	1079.6	1003.6	988.1
CAFS_HM_T_00008159	1.23809	0.000368	Complement factor H	620.6	633.2	636.1	613.4	597.4	580.1	753.7	738.9	724.7
CAFS_HM_T_00054834	1.23689	9.59e-05	Inter-alpha-trypsin inhibitor heavy chain H3	278.6	291.4	247.5	403.8	391	404.9	493.9	488	502
CAFS_HM_T_00000117	1.23328	0.003173	--	2258.2	2229.7	2386.4	1956.8	1797.4	1770.4	2335.7	2261.4	2216.3
CAFS_HM_T_00005393	1.22675	0.001649	Complement factor H	375.2	347.6	360	367	341	340.3	439.3	427.1	419.6
CAFS_HM_T_00054660	1.22639	0.028256	Protein FAM116A	67.5	62.1	60.6	60	56.3	54.2	67.1	65.5	76.5
CAFS_HM_T_00008224	1.21947	0.004253	Complement C3	567.7	559.5	625.7	587.6	610.4	645.5	767.2	718	762.9
CAFS_HM_T_00050695	1.21521	0.00293	60S ribosomal protein L35	2160	2172.6	2375.1	2143.1	2305.8	2334.2	2668.8	2746.5	2827.6
CAFS_HM_T_00074341	1.2143	0.001652	AP-1 complex subunit sigma-3	129	138.2	143.9	132	136.8	129.7	159.9	156.7	167.3
CAFS_HM_T_00074929	1.21369	0.000448	Lipoamide acyltransferase component of branched-chain alpha-keto acid dehydrogenase complex, mitochondrial	1156.6	1149	1151.9	1100	1062.5	1112.4	1336.5	1345.1	1293.1
CAFS_HM_T_00069222	1.21345	0.001927	--	2317.6	2274.2	2292.3	1901.3	1808.6	1886.3	2221.8	2211.8	2357.1
CAFS_HM_T_00073316	1.20926	0.004951	Nicotinamide N-methyltransferase	4033.8	4064	4303.3	4101.7	4085.4	4530.9	5005.1	5178.9	5195.4
CAFS_HM_T_00010325	1.20868	0.008431	Glycine cleavage system H protein, mitochondrial	621.9	600.7	668.9	582.2	573.1	651.8	733.6	713	737.6
CAFS_HM_T_00038994	1.20681	0.000646	4-hydroxyphenylpyruvate dioxygenase	6665.5	6318.9	6664.2	7047.1	6607	6808.9	8350.4	8101.2	8243.3
CAFS_HM_T_00042239	1.20592	0.002128	Hemoglobin subunit alpha	1196.9	1160.3	1370.8	1220	1217.9	1302.9	1517.2	1458.4	1535.5
CAFS_HM_T_00006990	1.20039	5.36e-05	Protein AMBP (Fragment)	5214.9	5055.1	5072.8	5376.2	5553	5486	6618.9	6511.3	6574.5
Down-regulated
Protein	Fold Change	P.value	Annotation	ck_0h_1	ck_0h_2	ck_0h_3	hy_5h_1	hy_5h_2	hy_5h_3	re_5h_1	re_5h_2	re_5h_3
CAFS_HM_T_00072375	0.347176	0.001933	Lectoxin-Lio1	205.4	203.3	222.5	646.2	622.3	496.6	231.1	228.9	152.8
CAFS_HM_T_00022859	0.370135	0.004605	--	498.2	537.9	467.2	774	532.4	643.7	225.5	271.5	224.8
CAFS_HM_T_00006719	0.444489	5.71e-05	Antihemorragic factor cHLP-B	7057.5	7251.1	8004.5	12441.3	13367.4	13512.2	5963.9	6136.4	5377.4
CAFS_HM_T_00090021	0.449126	0.000866	--	235.8	232	259	443.4	445.6	369	199.9	181.4	183.7
CAFS_HM_T_00019321	0.449147	0.005633	Intermediate filament protein ON3	5422.8	5616.3	4948.3	3594.4	4129.7	2901.6	1561.3	1703.5	1507.7
CAFS_HM_T_00016010	0.472493	0.021592	Heme oxygenase	725.7	806.1	765.6	1371.1	1299.3	1046.9	584	595.8	576.6
CAFS_HM_T_00067845	0.507263	0.040367	N-acetylated-alpha-linked acidic dipeptidase-like protein	108.3	134.3	108.8	90.2	105.4	72.9	47.2	46	43
CAFS_HM_T_00086239	0.507366	0.003621	Nattectin	423.2	406.1	399.3	952.7	914.4	732.6	458.5	453.2	407.3
CAFS_HM_T_00085742	0.513686	0.022127	Schwannomin-interacting protein 1	399.5	401.7	384.2	588.2	382.6	435.7	216.8	252.8	252.9
CAFS_HM_T_00023764	0.54358	0.001132	Complement C1q-like protein 2	96.3	104.1	94.3	119.1	123.4	140.7	69.3	73.5	65.5
CAFS_HM_T_00001210	0.546234	0.000956	--	1728.7	1619.2	1793.5	1498.3	1700.6	1615.7	994.3	801.9	833.7
CAFS_HM_T_00029421	0.56956	0.016579	Adseverin	368.2	382.6	360.2	376.6	467.3	325.6	229.4	231.6	205.1
CAFS_HM_T_00066046	0.60056	0.004792	Drebrin-like protein	613	673.3	583.6	675.6	697.8	556.3	381.6	407.8	369.5
CAFS_HM_T_00063794	0.607033	0.039583	Caveolin-2	397.9	419.3	416.3	372.5	379.2	289.1	215.7	214.4	201.7
CAFS_HM_T_00062638	0.608934	0.049441	Intestinal mucin-like protein (Fragment)	1563.3	1621.3	1605.1	1284	1252.6	953.6	714.9	708.5	701.9
CAFS_HM_T_00086404	0.609433	0.006527	Perilipin-2	64.5	60	60.3	111.2	93.2	120	69.8	63.7	64.2
CAFS_HM_T_00006283	0.613075	0.000597	--	411.6	409.8	450.4	342.8	376.8	349.6	236.9	212.6	206
CAFS_HM_T_00013689	0.615858	0.013597	Amine sulfotransferase	1763.9	1767.9	1768.2	2072.2	1804.1	2366.7	1328.1	1423.9	1092.8
CAFS_HM_T_00067712	0.615889	0.013616	--	713.1	714.2	598.6	546	482.2	404.2	282.8	323.4	276
CAFS_HM_T_00053902	0.617949	0.039868	--	124.6	137.4	112.2	122.8	108	81.2	60.7	74.5	57.6
CAFS_HM_T_00062604	0.623924	0.035345	Galanin	626.5	673.7	651.8	566.2	393.1	435.1	249.7	306.4	313.9
CAFS_HM_T_00081885	0.626553	0.000364	Carcinoembryonic antigen-related cell adhesion molecule 3	71.6	85.6	73.4	97.7	94.9	89.1	62.4	56.2	57.9
CAFS_HM_T_00030303	0.635678	0.004177	Keratin, type I cytoskeletal 50 kDa	3633.8	3591.2	3212.9	2422	2726.1	2271.7	1563.4	1706.1	1447.1
CAFS_HM_T_00039938	0.643766	0.027533	Catechol O-methyltransferase	2143.7	2062.1	2086.3	3572	2894.1	3239.6	2088.5	2089.9	2069.8
CAFS_HM_T_00043635	0.646072	0.006171	Integrin beta-3	747.2	748.1	710.4	963	1007.2	807.2	611.2	611.3	571.9
CAFS_HM_T_00063792	0.646892	0.008276	Caveolin-1	1452	1443.4	1314.5	1289.8	1278.1	1027.6	765.7	807.2	753
CAFS_HM_T_00027614	0.66253	0.037738	Fatty acid-binding protein, heart	2704.1	2647.7	2821.8	3304.9	2605.1	2929.6	1911.1	1975.8	1969.6
CAFS_HM_T_00040871	0.663254	0.001338	Probable glutamate receptor	4804	4743.7	4937.2	6341.4	7248.8	6938.3	4642.2	4658.7	4314.7
CAFS_HM_T_00014931	0.663881	0.010282	Protein NLRC3	158.9	166.7	151.2	221.7	191	173.7	133.5	132.3	123.5
CAFS_HM_T_00032279	0.664471	0.013114	Leukocyte elastase inhibitor	1804.8	1802.2	1705	1425.8	1703.1	1319.3	991.2	1024	940.5
CAFS_HM_T_00083277	0.670247	0.044165	Pre-B-cell leukemia transcription factor-interacting protein 1	65.5	68	60.8	57	75.5	53.7	43.8	43.3	37.7
CAFS_HM_T_00002920	0.671497	0.006416	DLA class II histocompatibility antigen, DR-1 beta chain	1128.6	1039.4	1063.3	721.6	767.4	636.4	439.1	517.1	471
CAFS_HM_T_00061499	0.675302	0.006008	Polymerase I and transcript release factor	3344.1	3430.7	3323.4	2967.5	2982.6	2476.2	1873	1977.6	1839.7
CAFS_HM_T_00062063	0.682973	0.002602	Annexin A2	7028.7	7113.5	7265.3	6430.4	6221.4	5509.1	4027.9	4261	4114.5
CAFS_HM_T_00015573	0.683502	0.029961	Rho GDP-dissociation inhibitor 2	1207.1	1174.4	1151.7	943.6	1128.2	818.9	693.3	664	618.5
CAFS_HM_T_00009324	0.684442	0.013252	EH domain-containing protein 2	2503.8	2544.2	2598.2	2180.6	2403.4	1864.9	1442.8	1539.6	1431.5
CAFS_HM_T_00027144	0.686137	0.014482	Caldesmon	2852.8	2870.5	2743.1	3347.2	3336.3	2659.1	2171.6	2227.4	2011.3
CAFS_HM_T_00033277	0.686307	0.029018	Uncharacterized transmembrane protein C1orf95 homolog	343.3	353.6	301.8	270	305.3	220.7	187.1	186.4	172.8
CAFS_HM_T_00045016	0.687914	0.013494	CD81 antigen	1239.3	1248.7	1250.8	960.5	1030.1	805.1	608.6	671.4	643.2
CAFS_HM_T_00058061	0.688019	0.001297	Round spermatid basic protein 1	30.5	26.2	27.4	28.8	27.1	28.4	21.2	18	18.8
CAFS_HM_T_00035137	0.692023	0.026136	Long-chain-fatty-acid--CoA ligase 1	2662.7	2700.8	2527.3	2525.3	3341.9	2688.3	2030.7	2019.8	1870.1
CAFS_HM_T_00065854	0.693338	0.012358	Myosin-Ic	1944.8	2010.9	1827.4	1729.5	1800.5	1429.2	1153.6	1189.8	1095
CAFS_HM_T_00061056	0.694076	0.004602	Uncharacterized protein C4H3.07c	622	711.1	606.7	835.1	941.1	794.7	587	621.6	575.8
CAFS_HM_T_00004918	0.695485	0.025663	Gamma-glutamyltransferase 5	133.2	148	138.4	208.9	189.8	175	135	133.3	130.7
CAFS_HM_T_00016607	0.697417	0.004105	Serum deprivation-response protein	1755.4	1823.9	1852.8	1757.6	1744	1512.9	1146.7	1228.1	1122.4
CAFS_HM_T_00082317	0.699822	0.040269	Neurobeachin-like protein 2	18.2	20.3	21.9	17.8	21.6	16.9	13.2	11	15.2
CAFS_HM_T_00036892	0.700696	5.64e-05	Zinc transporter ZIP8	311.2	299	303.5	388.2	390.6	384.9	282.2	272.6	260.6
CAFS_HM_T_00017167	0.702635	0.017253	Lipoma-preferred partner	932.6	944.4	834.1	871.8	849.3	684.7	586.2	568.9	535.3
CAFS_HM_T_00046726	0.706331	0.011341	AMP deaminase 3	166.2	179.7	154.4	174.1	186.1	151.6	126.1	124.9	110.5
CAFS_HM_T_00065317	0.707852	0.00694	Annexin A1	4143.5	4232.3	4312	3959.9	3682.9	3275.3	2560.5	2689.6	2478.3
CAFS_HM_T_00035257	0.711754	0.010292	Transmembrane emp24 domain-containing protein 11	230.2	243.5	237	267.1	238.5	216.7	163.8	178.5	171.8
CAFS_HM_T_00053895	0.711864	0.025971	Homer protein homolog 3	14	14.9	16	18.1	23.2	23.6	15.8	14.7	15.7
CAFS_HM_T_00053222	0.719536	0.005427	6-phosphofructo-2-kinase/fructose-2,6-biphosphatase 4	72.2	85.7	84.3	79.6	84.7	94.2	60.4	64.1	61.5
CAFS_HM_T_00070702	0.721228	0.04745	SAM domain and HD domain-containing protein 1	2533.4	2748.8	2311	1401.1	1214.3	1133.9	891.8	907.3	905
CAFS_HM_T_00020406	0.724551	0.01896	Protein kinase C epsilon type	28.6	37.8	29.6	30	26.6	26.9	20.2	20.3	20
CAFS_HM_T_00052401	0.726242	0.032145	Collagen alpha-1(V) chain	648.2	617.8	627.7	485.8	571.8	433.5	336.5	377.3	369.1
CAFS_HM_T_00056822	0.730407	0.001037	CD63 antigen	2591	2555.3	2730.3	2479.3	2582.1	2340.5	1749.4	1866.7	1790.3
CAFS_HM_T_00051111	0.732994	0.021104	Dihydropyrimidinase-related protein 3	5439.7	5443.8	5461.1	4844.1	5272.2	4194.6	3350.8	3788.6	3350.4
CAFS_HM_T_00085780	0.736179	0.007582	--	210.9	214	234.3	273.7	247.9	232.7	174.9	185.3	195.1
CAFS_HM_T_00085065	0.742825	0.011365	Protein S100-B	1335.3	1390.8	1354.4	1281.3	1262	1066.7	876.6	919.2	885.8
CAFS_HM_T_00084337	0.743008	0.002659	Carcinoembryonic antigen-related cell adhesion molecule 3	78.1	69.8	79.7	86.2	81.8	78.7	65.7	58.3	59.3
CAFS_HM_T_00001947	0.747583	0.000699	Ig kappa chain C region	729	681.6	655	667.7	676	642.3	499.3	517.5	467.9
CAFS_HM_T_00017527	0.748154	0.000117	Alpha-enolase	613.1	637.8	610.9	567.2	587.6	564.9	432.9	437.4	416.3
CAFS_HM_T_00002441	0.748171	3.7e-06	--	479.9	480.3	446.3	469.5	478.3	473.8	355.4	350.4	357.8
CAFS_HM_T_00056934	0.748351	0.009276	Cysteine and glycine-rich protein 1	2754	2581.8	2744.1	2600.2	2548.4	2206.1	1798.5	1921.6	1783.8
CAFS_HM_T_00045124	0.748469	0.00823	Retinal dehydrogenase 2	5478.7	5555.4	5330.5	4274.3	4739.6	3984.5	3320.1	3232.2	3176.6
CAFS_HM_T_00007095	0.748632	0.000751	Fish-egg lectin	460.8	413.8	444.6	355.5	383.7	375.9	288.1	268.9	277.8
CAFS_HM_T_00008426	0.753983	0.018043	Lipid phosphate phosphohydrolase 2	61.5	75.8	73.5	72.2	67.3	73.9	48.2	61.6	51.1
CAFS_HM_T_00002918	0.754593	0.000388	HLA class II histocompatibility antigen, DP alpha 1 chain	1332.1	1176.2	1340.8	1014.8	965.2	942.9	741.7	737.5	726.4
CAFS_HM_T_00028635	0.755041	0.010444	--	1032.7	1029.8	970.4	806.7	839.5	709.3	568.5	623.4	586.6
CAFS_HM_T_00092419	0.756157	0.002676	Cysteine-rich protein 2	363.9	377	382	329.7	341.2	311.7	234.9	263.6	244.5
CAFS_HM_T_00076582	0.756461	0.001683	Glypican-1	193.5	192.5	194	247	238.6	226.4	177	188.9	172.7
CAFS_HM_T_00030374	0.757463	0.021365	Proteasome subunit beta type-8	598.8	695.3	585	693.4	653.5	555.9	483.8	494.7	462.8
CAFS_HM_T_00022603	0.757801	0.010829	Myoferlin	652.4	697.9	644	702.4	697.3	644.9	515.9	521.5	512
CAFS_HM_T_00082346	0.758469	0.000213	Beta-1-syntrophin	192.6	245.2	188.7	186.9	194.7	188.1	138.8	147.1	146.2
CAFS_HM_T_00056473	0.759174	0.038939	Alpha-enolase	2194.1	2205.2	2149.8	1715.4	1844.5	1549.6	1272.4	1300.8	1305.8
CAFS_HM_T_00052040	0.759695	0.03908	Guanine nucleotide exchange factor VAV2	67.9	62.8	69.9	50.3	59.1	47.9	40.7	35.3	43.5
CAFS_HM_T_00013316	0.760105	0.00185	Ig mu chain C region membrane-bound form	726.7	681.9	681	575.8	591.2	542.5	451.1	437.7	410.6
CAFS_HM_T_00014424	0.760169	0.017616	Metalloproteinase inhibitor 2	714	710.6	738.4	509.8	431.8	430.2	331.5	345	366.3
CAFS_HM_T_00012823	0.760227	0.030881	Ankyrin repeat and SAM domain-containing protein 4B	577.6	588.2	535.2	437.1	466.6	365	335.6	317.5	311.4
CAFS_HM_T_00084655	0.760452	0.000857	Four and a half LIM domains protein 3	356	390.1	380	368.4	372.6	347.3	270.3	287.3	270
CAFS_HM_T_00031871	0.763542	0.000378	Thrombospondin-1	533.9	545.2	549.4	815.2	803.1	763.1	618.4	602.1	597.8
CAFS_HM_T_00008502	0.763957	0.016157	YjeF N-terminal domain-containing protein 3	283	307.5	261.5	246.1	270.2	221.7	189.2	193.9	180.7
CAFS_HM_T_00003170	0.764061	0.012422	Calcium/calmodulin-dependent protein kinase type II subunit beta	309.2	326.9	301	315.8	353	298.4	249.4	256.8	232.8
CAFS_HM_T_00048762	0.766331	0.005058	Astrocytic phosphoprotein PEA-15	321.3	353.2	327.6	255.9	289.5	258.3	201.4	211.1	203.4
CAFS_HM_T_00087621	0.768629	0.038349	Hephaestin-like protein 1	142.6	142.1	148.6	154.7	132	122.6	101.9	113	99.7
CAFS_HM_T_00033394	0.769358	0.013141	EMILIN-1	2528.9	2581.9	2541.5	2377	2569.3	2138.7	1826.5	1863.6	1760.8
CAFS_HM_T_00001288	0.769457	0.002699	CD48 antigen	1933.2	1895.3	1950.3	2359.7	2432.2	2543.4	1751	1967.4	1925.8
CAFS_HM_T_00077575	0.771903	0.029558	Calponin-2	899.6	906.7	906	879.6	869.5	770	639.3	657	648.2
CAFS_HM_T_00074024	0.77556	0.024199	Inositol-3-phosphate synthase 1-A	141.8	167.7	144.4	179.1	207.9	184.2	159.1	152.2	131.7
CAFS_HM_T_00085027	0.775723	0.0477	--	3830.5	3875.8	4016.6	3225	2622.9	2553.3	2159.8	2288.1	2069.1
CAFS_HM_T_00040780	0.776641	0.024744	Adipocyte enhancer-binding protein 1	380.9	363.5	368.4	419.6	476.7	394	323.3	358.7	320.1
CAFS_HM_T_00002652	0.780164	0.000244	Protein NLRC3	62.8	58.8	56.9	66.2	64.3	65.1	49.8	52.9	49.9
CAFS_HM_T_00084784	0.781749	0.004173	Cathepsin S	668.2	722.7	664.3	762.3	777.3	690.4	584.8	568.6	589.9
CAFS_HM_T_00028559	0.781966	0.008475	Flotillin-1	298.9	316.3	287.9	264.5	292.5	254.8	220.4	209.8	204.6
CAFS_HM_T_00058714	0.782217	0.023223	PRA1 family protein 3	484.8	461	471.3	465.9	461.6	404.1	340	381.8	319.8
CAFS_HM_T_00037535	0.782485	0.009766	Glucosamine-6-phosphate isomerase 1	2671.5	2823.6	2450.3	1675	1774.2	1516.9	1336.2	1277.1	1272.6
CAFS_HM_T_00020032	0.782682	0.008034	Phosphoenolpyruvate carboxykinase, cytosolic [GTP]	888.7	887.3	808.3	1249.3	1089.2	1166.5	868.2	931.6	943.5
CAFS_HM_T_00026540	0.78276	0.039139	--	2211.2	2178.9	2275.9	1969.2	2104.3	1794.2	1557.7	1523.3	1512
CAFS_HM_T_00027073	0.783363	0.025094	Solute carrier family 41 member 2	445.1	453.6	432.6	458.6	386.2	388.6	309.5	340.3	316.4
CAFS_HM_T_00037119	0.784304	0.0405	Protein diaphanous homolog 2	217.8	223.4	214.1	193.6	231.9	197.6	145.4	173.2	170.1
CAFS_HM_T_00003791	0.784402	0.007663	Tyrosine-protein kinase SYK	523.5	528.7	497.5	469.4	483.5	419.1	358.1	365	353.1
CAFS_HM_T_00040130	0.784406	6.59e-05	Voltage-dependent anion-selective channel protein 2	5113.8	4908.8	5010.4	4731.3	4609.9	4567.8	3671	3663.9	3575.4
CAFS_HM_T_00061581	0.784844	0.003909	Oncoprotein-induced transcript 3 protein	490	494.1	474.5	418.1	403.9	384.1	294.5	327.6	324.5
CAFS_HM_T_00042897	0.785805	0.0076	Canalicular multispecific organic anion transporter 2	1128.6	1141.9	1103	1103.6	1210.4	1054.9	857.5	909.3	880.5
CAFS_HM_T_00091530	0.78765	0.043733	Kunitz-type protease inhibitor 1	584.8	600.2	540.6	446.4	514.9	418.5	356.2	395.2	335.4
CAFS_HM_T_00005179	0.789436	0.021298	Calpain-2 catalytic subunit	152	148.2	167.7	144.9	147.7	127.7	103.7	120.4	107.7
CAFS_HM_T_00043005	0.789771	0.02104	Vinculin	11654.7	11934.7	11242.8	10347.2	11317.1	9366.6	8159.2	8476.2	7871.9
CAFS_HM_T_00016273	0.791503	0.017899	--	325.8	327.4	307.6	353.1	337.1	300.7	273.5	266.2	244.6
CAFS_HM_T_00011271	0.792052	0.002587	Cathepsin H	1341.8	1422.9	1426.9	1216.2	1326.7	1269.6	999.1	1050	970.6
CAFS_HM_T_00000074	0.792483	0.01985	Cytoglobin-1	1539.8	1547.5	1471.8	1274.2	1325.7	1132.8	955.5	1060.5	942.1
CAFS_HM_T_00085867	0.792789	0.009907	Phosphorylase b kinase gamma catalytic chain, skeletal muscle isoform	344.7	358.3	339.1	378.8	364.6	352.1	288.6	289.3	290.6
CAFS_HM_T_00058095	0.793036	0.031168	Basement membrane-specific heparan sulfate proteoglycan core protein	12692.5	13191.8	12152.6	10590.5	11198.4	9041.6	8206.5	8322.1	7921.1
CAFS_HM_T_00053848	0.793834	0.001181	Keratin, type I cytoskeletal 16	1266.8	1280.9	1293.8	1240	1255.2	1283.8	948.6	1048.1	1003.2
CAFS_HM_T_00013539	0.794656	0.015337	--	183.7	188.3	193.6	200.4	221.2	233.4	172.5	183.3	164.7
CAFS_HM_T_00069429	0.795441	0.018117	Carbonic anhydrase 4	184.3	212.5	191.2	274.2	269	307.9	240.5	226.4	210.1
CAFS_HM_T_00034064	0.797066	0.001656	A-kinase anchor protein 12	1809	1811.9	1717.8	1730.3	1712.2	1655.7	1334.2	1431.4	1298
CAFS_HM_T_00049946	0.797651	0.030671	Mammalian ependymin-related protein 1	695	772.9	616.9	316.1	294.4	257.8	240	231.7	220.9
CAFS_HM_T_00058041	0.798065	0.00213	Rab GDP dissociation inhibitor alpha	1137.1	1167.5	1094.9	1055	1054.5	970.2	802.9	830.1	824.8
CAFS_HM_T_00074129	0.798929	0.00509	Tropomyosin alpha-4 chain	2303.7	2389.9	2351.9	2189.2	2122.7	1964	1658.9	1737.6	1617.5
CAFS_HM_T_00059400	0.799524	0.003596	Cytochrome c oxidase subunit 4 isoform 2, mitochondrial	2145	2077.4	2076.9	1728.2	1925.8	1849.4	1497.3	1438	1464.8
CAFS_HM_T_00059830	0.799592	0.000216	Lipocalin	688	652.1	689.6	651.3	662.2	647.5	511.3	541	515.7
CAFS_HM_T_00063878	0.802033	0.044143	Alpha-parvin	834.3	833.8	760.2	726.9	812.4	644.4	563.1	599.8	588.5
CAFS_HM_T_00060587	0.802479	0.004026	Ig kappa chain V-IV region (Fragment)	605.3	617.6	589.8	562.6	519.3	515.4	442.6	428.4	410.8
CAFS_HM_T_00037464	0.802818	0.00943	Neuroblast differentiation-associated protein AHNAK	16529.2	16851.2	16745.6	15975.3	15768.5	14026.1	12210.1	12568.7	11966.1
CAFS_HM_T_00070890	0.803204	0.005734	--	38.8	53.4	48.1	43.6	45	42.5	32.5	37.4	35.4
CAFS_HM_T_00063020	0.805188	0.024473	--	77	84.8	70.4	70.9	59.7	66	50.8	51.5	56
CAFS_HM_T_00082797	0.805376	0.003706	NADP-dependent malic enzyme	9816.9	9988.9	10220.5	10089.8	9657	10419.6	8478.5	7670.6	8146.2
CAFS_HM_T_00085049	0.80566	0.01798	Ras-related protein Rab-13	433	457.1	433.7	449.1	440.6	389.5	323.8	360	346.8
CAFS_HM_T_00039802	0.806365	0.028835	Acyl-CoA-binding domain-containing protein 6	319.5	321.4	272	307.4	368.3	332.9	279	279.7	254.6
CAFS_HM_T_00084575	0.806438	0.010499	SH3 domain-containing kinase-binding protein 1	203.8	218.5	196	156	170.4	152	121.3	134.5	130
CAFS_HM_T_00003972	0.807269	0.007544	Annexin A3	4594.2	4554.8	4408.8	4110.2	4280.1	3760.3	3316.7	3284.8	3207.3
CAFS_HM_T_00022408	0.807814	0.001789	Cofilin-1-A	315.3	354.2	338.1	401.8	423.6	439	341.6	343.1	336.7
CAFS_HM_T_00056008	0.807963	0.042445	Disks large-associated protein 4	226.6	223.8	198.5	201.5	219.9	176.4	158.2	157.3	167.5
CAFS_HM_T_00043779	0.808011	0.027042	Macrophage-capping protein	901.7	899.3	936.2	926.6	828.7	776.1	649.8	684.7	710.9
CAFS_HM_T_00081260	0.808028	0.014719	Integrin alpha-V	606.3	661.2	622.6	639.1	584.8	552.4	472.3	500.1	462.9
CAFS_HM_T_00028509	0.808347	0.000467	StAR-related lipid transfer protein 3	536.9	535	524.6	636.2	650.9	668	537	531.4	512
CAFS_HM_T_00082206	0.808876	0.021865	Zyxin	1344.8	1528.9	1368.4	1322.8	1410	1178.8	1057.7	1072.7	1033.6
CAFS_HM_T_00027612	0.808957	0.002628	Tumor protein D52	1547.4	1609.8	1648.6	1591.4	1599.3	1514	1225.6	1339.6	1240.7
CAFS_HM_T_00024622	0.808987	0.011943	Beta-2-microglobulin	1313.3	1297.8	1212.3	933.9	1000	870.1	747.1	787.5	733.8
CAFS_HM_T_00061594	0.809245	0.03844	CaiB/baiF CoA-transferase family protein C7orf10	55.6	59.4	51.6	62.2	56.8	69.2	51.4	53.2	47.7
CAFS_HM_T_00005419	0.80954	0.003655	Receptor-type tyrosine-protein phosphatase C	373	397.6	367.2	304.9	309	287.6	255.3	242.4	232.1
CAFS_HM_T_00008904	0.810868	0.007318	--	202.1	216.4	191.1	216.1	202.7	190.3	165.7	166.8	161.4
CAFS_HM_T_00010280	0.811555	0.003828	--	266.3	277.6	302.9	328.8	320.4	323.5	257	282.4	250
CAFS_HM_T_00067645	0.811563	0.016195	Sarcoplasmic/endoplasmic reticulum calcium ATPase 3	2244.7	2272.4	2185.2	2093	2259.8	2107.7	1743.6	1757.4	1742.1
CAFS_HM_T_00048703	0.811581	0.001228	Coagulation factor XIII A chain	1484.7	1529	1448.4	2082.9	2088.4	1950.7	1662.4	1676.6	1629.5
CAFS_HM_T_00037020	0.811843	0.002175	Fermitin family homolog 3	1007	982.3	960.6	1057.4	1062.5	982.3	833.4	858.8	826.3
CAFS_HM_T_00089128	0.811912	0.022742	Glia maturation factor gamma	1035	1023.1	1086.9	807	854.6	772.9	656.9	662.4	657.3
CAFS_HM_T_00019014	0.812794	0.047386	Dermatopontin	824.8	809.2	812.9	710.7	819.7	659.7	595.5	610.1	574.5
CAFS_HM_T_00060798	0.813871	0.012347	Dihydropyrimidine dehydrogenase [NADP+]	49.9	56	45.6	56.2	59.4	53.1	42.9	48.4	46
CAFS_HM_T_00025437	0.815544	0.031065	Filamin-C	1144.8	1157.1	1074.2	1124.6	1207.8	1003.9	924.9	931.5	864.5
CAFS_HM_T_00045368	0.815863	0.019519	Prostaglandin reductase 1	1372	1419.7	1356.2	663.6	780.7	707.9	574	600	581.9
CAFS_HM_T_00079799	0.816237	0.000166	Immunoglobulin superfamily member 3	500.5	500	529.1	419.6	427	411	337.2	348.2	341.1
CAFS_HM_T_00084971	0.81701	0.000827	Zinc finger protein 576	113.9	129.6	119	126.4	131.5	130.1	107	108.5	101.5
CAFS_HM_T_00040298	0.817055	0.022764	Wiskott-Aldrich syndrome protein homolog	52.3	56.2	54.2	47.5	47.6	42.1	39.5	34.6	38
CAFS_HM_T_00075245	0.817057	0.043794	Protein Niban	701	681.8	668.6	620.9	682.7	595.9	514.7	524.5	512.8
CAFS_HM_T_00018915	0.818791	0.028024	Gelsolin	10822.4	10637.6	10753.5	10233.2	10914.6	9765.6	8334.7	8504.5	8472.4
CAFS_HM_T_00010107	0.819088	0.001717	Liprin-beta-1	528.9	538.2	510.4	531.5	554.6	569.4	461	458	437
CAFS_HM_T_00015138	0.819166	0.001933	Formin-like protein 1	125.9	113.9	118.1	103.6	102.9	98.2	82	80.7	86.9
CAFS_HM_T_00065089	0.819259	0.018758	Transcobalamin-1	245	242.8	239.4	232.3	243.4	250.2	188.5	218.6	187.6
CAFS_HM_T_00032503	0.819398	0.00766	Transthyretin	556.2	570.3	548.3	534.4	543.2	491.6	430.9	445.3	409.6
CAFS_HM_T_00027551	0.820217	0.033911	--	701.1	720.3	747	577.6	668.4	563.4	479	493.4	511.7
CAFS_HM_T_00068065	0.821502	0.038294	Moesin	7679.2	7716.8	7513.4	6749.2	6902.4	6117.3	5444.2	5425.4	5370.6
CAFS_HM_T_00040116	0.82196	0.000518	Tricarboxylate transport protein, mitochondrial	931.2	900.2	884.1	995.7	977.6	950.2	782	818.9	802.1
CAFS_HM_T_00056370	0.822256	0.005901	Sarcolemmal membrane-associated protein	2430	2432.5	2320.8	2133.9	2309.2	2134.9	1833.7	1858.6	1716.5
CAFS_HM_T_00020945	0.823728	0.046712	Sphingosine-1-phosphate lyase 1	1093.5	1176.1	1110.4	1122.6	1273.2	1038.1	910.6	947	971
CAFS_HM_T_00071700	0.823845	0.003229	Ubiquitin carboxyl-terminal hydrolase isozyme L1	998.8	983.8	988.6	921.2	967.9	884.6	771	770.9	743.2
CAFS_HM_T_00076108	0.824054	0.040671	Protein NLRC3	145.7	146.8	140.5	106.9	117.6	100.6	97.3	84.4	86.2
CAFS_HM_T_00048978	0.82424	0.004068	Cadherin-1	597.3	612.1	625.4	570.2	595.7	538.7	472.3	471.4	461.3
CAFS_HM_T_00068639	0.824321	0.027314	Long-chain-fatty-acid--CoA ligase ACSBG2	1836.6	1839	1815.6	2164.5	2394.2	2217.3	1850.4	1881.4	1853.8
CAFS_HM_T_00017170	0.82503	0.036833	Lipoma-preferred partner homolog	201.2	212.6	196.7	202.3	202.1	171.7	150.7	163.5	161.1
CAFS_HM_T_00016432	0.825384	0.019689	Glycerol-3-phosphate dehydrogenase, mitochondrial	3061.1	3093.4	2838.1	2577.5	2785.6	2390.5	2094.8	2206.6	2098.3
CAFS_HM_T_00059126	0.827224	0.0055	--	204.7	208.7	202.3	239.8	225.5	230.4	180	199.8	195.7
CAFS_HM_T_00063456	0.827802	0.023242	Talin-2	2211.2	2227.8	2119.1	1938.9	2161.8	1844.2	1612.3	1665.9	1643
CAFS_HM_T_00021076	0.828355	0.034743	Hexokinase-1	3379.5	3366.2	3258.9	2794.4	2988.6	2482.9	2251.8	2343.9	2251.4
CAFS_HM_T_00028841	0.82862	0.00025	Epiplakin	16409.3	16515	16543.1	16749	16558.9	16295.4	13594.4	14067.9	13440
CAFS_HM_T_00074221	0.828744	0.014314	Protein-glutamine gamma-glutamyltransferase K	2407.1	2519.8	2420.5	2444.2	2298.1	2132.2	1856.1	1954.2	1886.9
CAFS_HM_T_00082459	0.829049	0.000181	--	446.2	436.8	446.9	406.6	417.9	412.7	348.2	334.1	343.4
CAFS_HM_T_00025760	0.830009	0.043126	--	363.8	380.4	365.6	323.4	292.1	266.9	240	254.2	238.2
CAFS_HM_T_00020940	0.830276	0.007967	PDZ and LIM domain protein 1	4196.1	4108.8	4192.1	4133.3	4079.3	3730.3	3368.4	3350.5	3197
CAFS_HM_T_00061958	0.830515	0.027276	L-lactate dehydrogenase A chain	2330.5	2312.4	2249.1	1922.8	2120	1799.6	1670.5	1584.8	1596.9
CAFS_HM_T_00017155	0.830607	0.012353	Phosphatidylinositol-3,4,5-trisphosphate 5-phosphatase 1	392.6	396.4	401.3	426.5	418.4	377.7	330.6	336.8	348.1
CAFS_HM_T_00047295	0.830973	0.001047	Myotubularin-related protein 10	72.2	114.8	87.9	109.9	104.6	103.2	88.3	87	88.7
CAFS_HM_T_00045272	0.831061	0.009725	Plasminogen activator inhibitor 1	1768.6	1726	1794.6	1580.2	1396.6	1505.3	1262.4	1236.4	1226.1
CAFS_HM_T_00070677	0.831078	0.012366	CD97 antigen	151.3	158.9	153.4	146	138.7	129.1	113.7	111.3	118.9
CAFS_HM_T_00007115	0.831837	0.010787	14-3-3 protein gamma	1725.5	1825.7	1858.6	1774.1	1974.6	1777.5	1523.1	1567.7	1506.1
CAFS_HM_T_00078356	0.832327	0.016845	6-phosphofructokinase, liver type	1853.8	1933	1787.1	1537.5	1706.4	1491.5	1289.7	1341.4	1310.3
CAFS_HM_T_00034035	0.833063	0.004042	Uncharacterized protein C14orf43	71.7	90.9	62.5	79.5	85.2	82.1	71.5	68.2	65.9
CAFS_HM_T_00074004	0.833148	0.003948	Inositol-3-phosphate synthase 1-A	295.5	303.4	298.5	352.6	373.2	353.6	311.9	301.3	286.1

## Sheet:  re_5h vs ck_0h
Table S6. The differentially abundant proteins (DAPs) in liver among three groups.
DAPs in re_5h vs ck_0h.
Up-regulated
Protein	Fold Change	P.value	Annotation	ck_0h_1	ck_0h_2	ck_0h_3	hy_5h_1	hy_5h_2	hy_5h_3	re_5h_1	re_5h_2	re_5h_3
CAFS_HM_T_00074105	2.32426	0.001876	Ubiquitin-60S ribosomal protein L40	13.6	14.6	12.2	12.7	13.7	17.9	27.1	31.6	35.2
CAFS_HM_T_00018176	2.14302	0.005172	Heme oxygenase-1	980.4	995.5	960	1432.4	1437	1492.9	1948.6	2100.6	2242.5
CAFS_HM_T_00054834	1.81517	8.35e-05	Inter-alpha-trypsin inhibitor heavy chain H3	278.6	291.4	247.5	403.8	391	404.9	493.9	488	502
CAFS_HM_T_00036801	1.80317	1.63e-05	Cathepsin F	1197.7	1149.7	1193.2	1751.8	2088.3	2082.5	2156	2170.5	2057.8
CAFS_HM_T_00054906	1.7677	0.009032	Sodium-coupled neutral amino acid transporter 3	291.3	380.9	303.7	416.6	478.4	528.5	614.8	486	624.3
CAFS_HM_T_00016021	1.76574	0.000195	--	196.1	210.3	190.8	342.8	316.6	343.6	357	365.5	332
CAFS_HM_T_00073456	1.67918	0.006848	CD48 antigen	91.4	119.7	97.8	59.3	61.5	59.7	157.4	168.1	193.2
CAFS_HM_T_00086047	1.64429	0.000722	Ubiquitin carboxyl-terminal hydrolase 16	471	509	463.6	485.6	505.1	477.9	749.2	849.2	775.3
CAFS_HM_T_00054826	1.58252	0.005719	Inter-alpha-trypsin inhibitor heavy chain H3	151	130	138.9	194.6	200.7	178.6	248.9	211.2	204.4
CAFS_HM_T_00069191	1.55021	7.1e-06	Phosphoserine aminotransferase	672.3	644.3	653	888.7	949.4	997.5	1020.2	1031.3	1001.8
CAFS_HM_T_00000978	1.54607	3.57e-05	Stonustoxin subunit alpha	1964	1983.9	1943.3	2980	2771.7	2934.7	3130.7	3025.6	2951.9
CAFS_HM_T_00033513	1.49516	0.005019	Sestrin-1	17.8	15.5	18.4	17.8	19.4	21.4	28.2	25	24.1
CAFS_HM_T_00077861	1.4848	0.03401	Nuclear receptor-binding protein 2	116.8	132.6	109.1	121.1	157.7	163.6	161.6	211.3	159.4
CAFS_HM_T_00015494	1.48232	0.046147	Myosin-binding protein C, fast-type	18.9	21.5	21.8	23.9	24.2	19.6	37.2	29.2	25.8
CAFS_HM_T_00054759	1.46907	1.61e-05	Uncharacterized protein C1orf50 homolog	581.8	600.3	582.9	751.1	776.4	811.8	854.4	883.2	855.3
CAFS_HM_T_00077286	1.45857	1.02e-05	Serotransferrin-1	7246.3	6940.6	7220.5	8956.4	8682.3	9135.4	10438.7	10504.9	10280.6
CAFS_HM_T_00041318	1.45619	3.76e-06	Acyl-CoA desaturase	556.6	578.7	569.9	839.5	869.1	798.7	834.2	826.6	822.3
CAFS_HM_T_00087876	1.4553	0.000714	Protein FAM55C	759.2	732.6	680.4	941.3	902.6	878.7	1038.7	1105	1017.5
CAFS_HM_T_00037168	1.43649	0.002963	Tryptophan 2,3-dioxygenase A	1219.4	1217.9	1216.6	1282.6	1359.9	1448.1	1707.9	1735.3	1805.6
CAFS_HM_T_00079786	1.43636	1.33e-05	Basic leucine zipper and W2 domain-containing protein 1-B	209.8	203	214.2	281.8	303.3	287.2	299.1	298.6	302.9
CAFS_HM_T_00066067	1.43487	4.99e-06	Cathepsin L1	3354.8	3292.8	3372.4	3788.5	4390.3	4322.7	4808.6	4722.4	4846.4
CAFS_HM_T_00028571	1.4347	0.00034	Major histocompatibility complex class I-related gene protein	193.7	180.8	175.3	179.8	205.8	179.2	259	258.1	271.7
CAFS_HM_T_00038982	1.43422	2.31e-06	Neuronal calcium sensor 1	246.2	254.2	251.3	304.3	294.7	317.5	361.5	356.8	359.8
CAFS_HM_T_00064787	1.42453	0.00205	Protein HIRA	13.7	14.7	14	14.3	13.8	20.4	18.9	21.6	19.9
CAFS_HM_T_00084033	1.41694	5.73e-05	Syndecan-2-A	298.2	313	312.2	442.1	422.7	449.4	426.6	445	436.8
CAFS_HM_T_00000005	1.41386	0.00069	--	211.8	205.3	197.6	373.7	294.2	320.7	305.3	284.5	279.3
CAFS_HM_T_00073708	1.4059	3.53e-06	Fibrinogen alpha chain	10454.6	10279.9	10626.8	12852.9	12524.6	12665.7	14755.4	14761.9	14573.5
CAFS_HM_T_00063299	1.40377	0.004979	Cytosolic 5&apos;-nucleotidase 1A	286.9	294.2	300.6	290.1	317.8	331.5	372.5	442.3	422.9
CAFS_HM_T_00052769	1.40213	0.002967	Cerebellin-3	445	394.2	446.2	383.1	403.4	450.4	564.2	603.1	635
CAFS_HM_T_00038885	1.39809	0.049589	Deoxyribonuclease gamma	40.5	48.2	58	48.4	51.9	60	75.3	59.1	70.7
CAFS_HM_T_00034910	1.39193	0.000868	--	92.5	81.9	90.7	88.2	80.9	83.2	125.6	124.5	118.9
CAFS_HM_T_00068582	1.38327	0.00065	3-hydroxy-3-methylglutaryl-coenzyme A reductase	1730	1796.9	1812.2	2844.9	2703.8	2857.2	2499	2553.2	2333.2
CAFS_HM_T_00070651	1.38113	2.2e-05	Mitochondrial uncoupling protein 2	2616.3	2558.2	2689.7	2944.8	3080.1	3065.5	3626	3580.2	3655.3
CAFS_HM_T_00051130	1.37938	0.005207	Steroid receptor RNA activator 1	116.2	125.8	120.7	116.4	126.1	145.4	182.3	157.6	160.4
CAFS_HM_T_00057877	1.37518	0.005875	Dynein heavy chain 7, axonemal	111.9	121.9	122.3	125.2	138.7	145	177	150.8	161.9
CAFS_HM_T_00044034	1.37096	0.000593	60S ribosomal protein L19	116.8	107.8	112.9	107.1	122.9	110.8	148	155.3	159.4
CAFS_HM_T_00032545	1.36751	7.9e-05	Transmembrane emp24 domain-containing protein 5	357.8	348.8	351.6	412.9	437.5	455.5	470.6	496	480.5
CAFS_HM_T_00044883	1.36041	0.001288	Corticosteroid 11-beta-dehydrogenase isozyme 2	122.6	134.8	140.2	164.6	155.7	167.9	175.9	179.4	185.6
CAFS_HM_T_00078107	1.35383	0.000817	Retinol-binding protein 1	530.2	534.6	576.4	694.7	759.2	789.6	745.5	764.6	711.8
CAFS_HM_T_00012202	1.35342	0.000608	Transcription factor 25	333.5	343.4	328.7	341.6	341.2	348.7	438.4	475.7	446.9
CAFS_HM_T_00067100	1.3489	0.000198	Cytosolic phospholipase A2 gamma	1587.4	1544.7	1523.1	2002.1	1949.5	1934.3	2160.6	2033.7	2085.1
CAFS_HM_T_00067097	1.34786	1.79e-05	Cytosolic phospholipase A2 gamma	849.7	844.8	835.8	1007.8	1142.4	1093.7	1154.6	1140.7	1115.2
CAFS_HM_T_00054187	1.34602	0.001041	Cytidine deaminase	90.8	91.3	99.1	99.4	105.8	111.9	121.1	127.1	130.3
CAFS_HM_T_00008153	1.34128	0.002831	Complement control protein	192.1	189.5	218.5	287	276.1	289.3	274.5	271.6	258.8
CAFS_HM_T_00077829	1.33121	0.006246	--	498.6	485.3	520.3	467.6	472.8	510.8	641.9	633.5	727
CAFS_HM_T_00026223	1.32901	0.040768	Chloride anion exchanger	72.9	71.6	94.7	86.5	100.8	88.7	113.1	97.3	107.5
CAFS_HM_T_00087294	1.32791	0.006662	--	565.4	573.1	596.1	544.4	567.6	498.3	714.3	835	754.1
CAFS_HM_T_00081762	1.32559	0.000337	Uridine phosphorylase 2	4152.5	4073.5	4127.9	4722.2	4801	4938.7	5640	5244.9	5491.3
CAFS_HM_T_00001623	1.32273	0.000765	Proteasome subunit beta type-7	388.7	403.7	389.1	547.3	539	551.7	495.5	536.9	530.4
CAFS_HM_T_00078043	1.32229	0.000422	Complement C1q-like protein 4	2726.2	2531.8	2739.4	3433.1	3185	3271.2	3556.6	3578.8	3439.5
CAFS_HM_T_00014736	1.32071	0.035957	F-box/WD repeat-containing protein 9	79.2	83.8	79.9	79.2	79	80.2	93.8	122.1	104.9
CAFS_HM_T_00025482	1.31616	0.001227	N(4)-(beta-N-acetylglucosaminyl)-L-asparaginase	271.8	282.6	249	264.3	258.3	276.9	348.8	358.6	350
CAFS_HM_T_00063160	1.30843	0.000368	Hypoxanthine-guanine phosphoribosyltransferase	223.3	219.1	222.9	256.8	265.1	277.7	296	278.2	296.3
CAFS_HM_T_00059760	1.30696	0.004995	Cryptochrome DASH	137.7	145.9	150	195.2	182.5	158.2	174.8	196.1	195.8
CAFS_HM_T_00071325	1.3032	3.33e-05	Fibrinogen beta chain	9896	9650.6	10064.5	11663.7	11328.7	11472.9	13014.5	12844.6	12730
CAFS_HM_T_00067599	1.30112	0.000636	Cytochrome P450 1A1	511.2	520.1	490.7	559.6	648.8	657.6	638	658.8	683.5
CAFS_HM_T_00023100	1.29711	0.001163	Microsomal glutathione S-transferase 3	2179.7	2166.4	2173.1	2171.3	2411.1	2577.8	2802.4	2786.5	2867.2
CAFS_HM_T_00053649	1.29449	2.03e-05	Nicotinamide phosphoribosyltransferase	2037.8	2107.4	2112.3	2551.1	2545	2737	2706.1	2715.3	2678.9
CAFS_HM_T_00030318	1.29435	0.000409	CD209 antigen-like protein C	2615.3	2455.5	2552.4	2764.9	2641.7	2895.2	3187.7	3332.1	3347.3
CAFS_HM_T_00004039	1.29412	0.03519	Protein-lysine 6-oxidase	123.9	127.5	112.4	129.4	130.2	125.9	176.8	152.6	141.4
CAFS_HM_T_00021542	1.28918	0.000185	Alcohol dehydrogenase 1	2081.1	2101.6	2189	1406	1336.1	1430	2802.6	2704.9	2706.8
CAFS_HM_T_00001290	1.28706	0.044622	--	117	109.4	103.5	193.8	143.9	179.2	125.2	160.3	139.1
CAFS_HM_T_00006990	1.2843	1.66e-05	Protein AMBP (Fragment)	5214.9	5055.1	5072.8	5376.2	5553	5486	6618.9	6511.3	6574.5
CAFS_HM_T_00008224	1.2825	0.003202	Complement C3	567.7	559.5	625.7	587.6	610.4	645.5	767.2	718	762.9
CAFS_HM_T_00022785	1.27819	0.007108	N(4)-(Beta-N-acetylglucosaminyl)-L-asparaginase	107	124.2	120	156.9	140.7	136.1	146.3	145.4	157.2
CAFS_HM_T_00026281	1.27718	0.000294	Branched-chain-amino-acid aminotransferase, cytosolic	1799.7	1839.5	1845.6	1916.7	1901.1	2022.8	2285.4	2415.1	2304.6
CAFS_HM_T_00015784	1.27563	1.46e-05	Band 3 anion exchange protein	3226.3	3146.8	3172.5	3462.9	3452.1	3500.2	4030.8	4110.1	4035.8
CAFS_HM_T_00071979	1.27428	4.21e-06	Complement C3 (Fragment)	7015.6	7134.6	7153.9	7494.2	7533.7	8189.5	9105.8	8981.5	9060.1
CAFS_HM_T_00054067	1.27389	0.009318	Advillin	41.9	45.6	38.1	54	40.6	55.6	54.2	51.1	54.7
CAFS_HM_T_00008161	1.27114	0.000374	Sushi, von Willebrand factor type A, EGF and pentraxin domain-containing protein 1	1178.2	1108.1	1198.3	1128.9	1111.2	1182.8	1490.9	1465.5	1473
CAFS_HM_T_00064464	1.2677	5.7e-06	Probable ribosome biogenesis protein RLP24	271.6	275.3	279.4	291.9	309.3	332	349.2	348.3	350
CAFS_HM_T_00046337	1.26709	0.000682	Alanine--glyoxylate aminotransferase 2-like 1	3264.5	3278.7	3440.1	3600.3	3586.4	3838.9	4115.3	4172.4	4362
CAFS_HM_T_00045311	1.2662	0.000708	Bcl2 antagonist of cell death	344.5	355.1	357.5	309.2	346	363.8	453	457.4	428.1
CAFS_HM_T_00009561	1.26551	0.000238	Cytochrome P450 1A1	2474.1	2463.3	2517.2	2591	2804.5	2903.6	3206.4	3045	3182.5
CAFS_HM_T_00091052	1.26448	0.010283	ATP-dependent RNA helicase DDX24	1407.2	1393.4	1340.3	1446.8	1481.3	1466.5	1890.7	1718.3	1627.1
CAFS_HM_T_00077687	1.2614	0.000501	Carbonic anhydrase	3934.8	3797.3	4028.1	4299.5	4177.6	4234.5	5041.1	4992.8	4800.4
CAFS_HM_T_00031744	1.26136	0.001956	Lactation elevated protein 1 homolog B	193.5	196.7	199.4	242.6	206.2	247.7	255.5	234.1	254.1
CAFS_HM_T_00003702	1.25937	0.000167	Long-chain fatty acid transport protein 6	8154.4	8065.8	8163.8	9558.8	9177.7	9993.6	10355.1	9935.7	10417.6
CAFS_HM_T_00038994	1.25683	0.000246	4-hydroxyphenylpyruvate dioxygenase	6665.5	6318.9	6664.2	7047.1	6607	6808.9	8350.4	8101.2	8243.3
CAFS_HM_T_00082670	1.25679	5.93e-05	Purine nucleoside phosphorylase	4386.2	4352.9	4323.4	4952.3	5044.5	5251.9	5526	5351.8	5539
CAFS_HM_T_00069939	1.25551	4.75e-05	Transitional endoplasmic reticulum ATPase	2366.8	2352.6	2400.6	2723.7	2620.6	2662.1	2928.7	3029.2	2981.3
CAFS_HM_T_00082375	1.25094	0.048166	Cdc42 effector protein 1	49.3	49.6	60.1	57.8	57.1	64.2	64.4	62.1	72.4
CAFS_HM_T_00047471	1.25084	3.48e-05	Putative N-acetyltransferase C7orf52	431.2	435.8	447	493.7	469.2	541.1	548.8	552	542.8
CAFS_HM_T_00037445	1.24761	0.007696	Baculoviral IAP repeat-containing protein 4	482.7	501.5	529.5	607.1	550.6	599.7	598.2	669.9	620.4
CAFS_HM_T_00091167	1.24465	0.000227	Glutaminyl-peptide cyclotransferase	377.8	392.3	398.1	410.2	414.7	391.8	484.5	476.9	492.6
CAFS_HM_T_00046902	1.24462	0.024253	Coiled-coil domain-containing protein 90A, mitochondrial	45.9	46.6	37.5	54.4	51.4	51	54.3	54.9	52.6
CAFS_HM_T_00071989	1.24363	0.000165	Complement C3 (Fragment)	2112	2216.6	2228.4	2480.5	2342.8	2605.4	2717.7	2739.3	2697.5
CAFS_HM_T_00019352	1.24256	0.005546	La-related protein 4	444.5	405.4	446.7	465	473.4	450.5	562.8	532.9	515.4
CAFS_HM_T_00001792	1.24246	0.000172	Cerebellin-1	3367.1	3340	3473.7	3460.1	3851.3	3805.7	4287.8	4133.3	4228.1
CAFS_HM_T_00073316	1.24016	0.000691	Nicotinamide N-methyltransferase	4033.8	4064	4303.3	4101.7	4085.4	4530.9	5005.1	5178.9	5195.4
CAFS_HM_T_00001845	1.23944	8.62e-05	Ethanolamine kinase 1	2688.2	2622	2569.7	2958.1	2886.6	2935	3260.3	3285	3221.4
CAFS_HM_T_00086195	1.23835	0.000151	Alkylglycerol monooxygenase	1977.2	1927.6	1919	2130.6	2189.2	2227.8	2395.6	2360.8	2455.5
CAFS_HM_T_00051946	1.23704	0.000472	Complement component C7	3203.3	3268.2	3252.9	4137.5	3627.1	3773.5	3890.4	4135.4	4003.7
CAFS_HM_T_00077813	1.23665	1.11e-05	ATP-binding cassette sub-family F member 2	2212.5	2194.5	2245.9	2506.9	2488.3	2635.7	2750.2	2718.5	2758.6
CAFS_HM_T_00021182	1.23633	0.019166	Ammonium transporter Rh type B	67.2	75.1	68	86.6	82.5	88.8	79.7	91.5	88.8
CAFS_HM_T_00071994	1.23494	0.000759	Complement C3 (Fragment)	3723.1	3689	3743.3	4041.6	3784.8	4086.7	4405.9	4686.9	4683.5
CAFS_HM_T_00089687	1.23452	4.11e-05	GTP cyclohydrolase 1	1240.5	1223.8	1233.5	1328.3	1339.5	1389.7	1528.7	1494.6	1541.7
CAFS_HM_T_00066779	1.23351	0.001113	Ankyrin-1	907.6	903.7	970.6	941.6	954	1003.7	1117.9	1147.2	1166.4
CAFS_HM_T_00067719	1.23348	0.0004	Probable ATP-dependent RNA helicase DDX31	371.7	373.7	365.2	384.5	412.9	419.3	442.6	459.1	468.2
CAFS_HM_T_00011552	1.23305	0.001592	Homocysteine-responsive endoplasmic reticulum-resident ubiquitin-like domain member 1 protein	616.7	642.1	614.2	723	764.8	764.2	772.6	797.6	739.3
CAFS_HM_T_00064079	1.23121	0.000129	AP-3 complex subunit sigma-2	104.2	106.9	102.9	125.7	118.6	134.3	127.9	131.2	127.5
CAFS_HM_T_00078038	1.23117	8.64e-05	Cerebellin-3	1263.4	1263.5	1301.9	1376.6	1437.5	1437	1555	1597.1	1561.8
CAFS_HM_T_00060751	1.23041	0.013274	ATP-dependent zinc metalloprotease YME1L1	124.2	113.7	106.7	148.9	134.5	142.9	147.9	140.7	135.4
CAFS_HM_T_00050695	1.22887	0.003579	60S ribosomal protein L35	2160	2172.6	2375.1	2143.1	2305.8	2334.2	2668.8	2746.5	2827.6
CAFS_HM_T_00014583	1.22802	0.003981	Hemoglobin subunit alpha	39376.6	41520.9	43289.2	46127.4	41256.1	44539.9	51221.4	48750.1	52532.2
CAFS_HM_T_00083974	1.22701	0.016402	Transcription initiation factor TFIID subunit 2	10.5	12.6	11.7	12	17.3	18.4	14.7	14.2	13.8
CAFS_HM_T_00065303	1.2258	0.000545	Guanine deaminase	5630.1	5749	5894.1	5792.7	5767.1	6104.9	6884.8	7044.6	7244.1
CAFS_HM_T_00031504	1.22554	9.58e-05	Oxysterol 7α-hydroxylase	337.6	330.5	339.7	374.7	346.2	358.1	418.8	411.1	405.2
CAFS_HM_T_00058002	1.22438	0.001528	45 kDa calcium-binding protein	2679	2578.8	2656	2813.9	2999.4	3093.1	3333.8	3260.6	3095.1
CAFS_HM_T_00053458	1.22435	0.001604	Something about silencing protein 10	1125.6	1096.8	1072.4	1111.7	1126.9	1126.7	1288.1	1379.3	1366.6
CAFS_HM_T_00001368	1.22434	0.001589	Serotransferrin-1	19891.9	20074.4	21176.7	22814.8	21788.9	23267.7	25656.8	24127.7	25075.1
CAFS_HM_T_00038302	1.22381	9.18e-05	GRAM domain-containing protein 3	645.8	642.5	618.2	659.7	643.7	692.8	773.7	780.8	778.7
CAFS_HM_T_00091029	1.22284	0.000224	C-1-tetrahydrofolate synthase, cytoplasmic	27400.5	26735.5	28140.8	31754.1	31281.4	33599.8	33791.8	33013.9	33805.9
CAFS_HM_T_00068403	1.22263	0.007242	Transmembrane protein 93	120.7	114.6	122.7	132.6	131	118.7	149.9	136.6	151.2
CAFS_HM_T_00054486	1.22225	0.008975	Soluble calcium-activated nucleotidase 1	2788.7	2812.2	2781.6	3192.8	3163.3	3242.7	3521.3	3303.5	3420.7
CAFS_HM_T_00017817	1.22199	7.92e-05	Cathepsin Z	3101.8	3185	3061.4	3300.1	3245.6	3141.4	3785.3	3788.6	3849.5
CAFS_HM_T_00017204	1.22083	0.005055	Uridine nucleosidase 1	530.5	520.9	501.8	545.5	558.2	558.2	642.5	595.8	657.9
CAFS_HM_T_00071811	1.2207	0.000151	Fibrinogen gamma chain	12397.2	11916.2	12461.9	13920.5	13341.3	13833.7	15132	14922.6	14836.9
CAFS_HM_T_00021903	1.22067	0.00101	Sphingolipid delta(4)-desaturase DES1	429.5	433.5	456.6	481.2	477.4	499.1	551.9	528.3	530.6
CAFS_HM_T_00008575	1.21971	0.000183	Nardilysin	1793.2	1843.2	1794.3	1980.8	1972.9	2069.6	2200.9	2254.1	2168.9
CAFS_HM_T_00012602	1.21942	0.001259	Hemoglobin cathodic subunit beta	14796.2	15908.2	15342.5	16718	15390.6	15731.8	18624.2	19213	18313.5
CAFS_HM_T_00013451	1.21722	7.18e-05	Calumenin	1440.1	1496.8	1468.7	1499.8	1501	1595.7	1792.7	1769.3	1800.6
CAFS_HM_T_00078662	1.21719	0.000114	Glutaminase kidney isoform, mitochondrial	3113.1	3030.8	3068	3095.9	3099.4	3245	3739.7	3671.6	3801.3
CAFS_HM_T_00057018	1.21536	8.24e-06	6-phosphofructo-2-kinase/fructose-2,6-biphosphatase	5513.1	5494.2	5534	6097	6159.9	6706.4	6717.2	6759.5	6627
CAFS_HM_T_00089943	1.21508	0.013854	SET and MYND domain-containing protein 3	84.2	78.5	78.6	100.7	97.3	105	95.1	105	93.1
CAFS_HM_T_00005616	1.21472	7.14e-05	Phospholipid hydroperoxide glutathione peroxidase, mitochondrial	1717.4	1648.2	1691.8	1879.5	1841.9	1928.6	2046	2060.7	2036.6
CAFS_HM_T_00017820	1.2142	4.29e-05	Tubulin beta-6 chain	1761.4	1744.7	1798.7	2053.8	2030	2035.4	2127.6	2167.4	2146.1
CAFS_HM_T_00021996	1.21384	0.004878	F-box only protein 9	302.3	299	284.4	325.6	337.3	336.4	376.7	355	343.4
CAFS_HM_T_00016595	1.21343	1.43e-05	Sterol 26-hydroxylase, mitochondrial	3338.6	3423.2	3352.3	4021.7	3757.6	3889.4	4111.1	4087.6	4074.1
CAFS_HM_T_00058176	1.21193	0.001776	DnaJ homolog subfamily C member 22	349.4	350.9	362.3	355.6	381.7	395.2	447.7	418.1	422
CAFS_HM_T_00032236	1.21187	1.63e-06	Amidophosphoribosyltransferase	1171.6	1174.4	1184.5	1345.6	1282.9	1393.5	1418.2	1432.1	1428.2
CAFS_HM_T_00037413	1.21146	4.58e-05	Cytochrome P450 4V2	3720.7	3773.2	3673.7	4051.8	4127.2	4167	4536	4449.8	4543.3
CAFS_HM_T_00042658	1.21137	0.000107	APOBEC1 complementation factor	9075.5	9011.2	9386	9598.7	9657.6	10621.6	10993.7	11167.5	11118.4
CAFS_HM_T_00077172	1.21124	3.38e-05	Acyl-coenzyme A thioesterase 11	2545.6	2594.9	2585	2910.2	2849.7	2816.9	3077.5	3151.9	3128
CAFS_HM_T_00020048	1.21118	0.012197	WW domain-binding protein 4	798.8	793.8	799.2	851.2	923.6	851.4	1000.3	962.5	934.1
CAFS_HM_T_00085776	1.21065	3.4e-05	Phosphoserine phosphatase	284.5	276.5	282.1	354.5	315.3	337.8	342.8	340.8	337.1
CAFS_HM_T_00062863	1.21063	0.000803	Fatty acid desaturase 2	1164.9	1170.7	1214.2	1521.5	1472.5	1544.6	1457	1452.9	1387.6
CAFS_HM_T_00042239	1.21006	0.019358	Hemoglobin subunit alpha	1196.9	1160.3	1370.8	1220	1217.9	1302.9	1517.2	1458.4	1535.5
CAFS_HM_T_00020775	1.20983	0.001379	tRNA (guanine-N(1)-)-methyltransferase	748.1	718.5	749.5	812.2	810.5	778.3	923.7	891.7	865.7
CAFS_HM_T_00086633	1.2097	0.0002	Alpha-2-antiplasmin	1543.3	1481.5	1489.7	1619.6	1581.3	1624.5	1848.5	1799.9	1812.8
CAFS_HM_T_00083396	1.20966	0.00027	Deoxyribonuclease-2-alpha	3021.8	2911.5	3086.7	3486.6	3289.6	3538.3	3657.1	3620.8	3633.2
CAFS_HM_T_00025333	1.20948	0.003828	Interferon-related developmental regulator 1	30.5	30.9	29.3	28.5	40.2	34.2	37.6	37.4	34.7
CAFS_HM_T_00072318	1.20894	0.013478	Cytochrome P450 3A27	9234.2	9229.6	9175.3	9744.8	9706.2	9995.7	11481.1	10701.9	11231
CAFS_HM_T_00021865	1.20787	0.003806	Nucleolar RNA helicase 2	1049.6	1106.8	999	1274.3	1248.3	1227.7	1268	1303.7	1239.6
CAFS_HM_T_00071990	1.20681	0.01297	Complement C3 (Fragment)	89.3	96.6	104.7	99.1	94.4	109.2	118.4	113.9	118.4
CAFS_HM_T_00022443	1.20633	0.019659	Galectin-related protein A	85.7	90.3	95.9	95.7	91.6	98	101.4	112.5	114.1
CAFS_HM_T_00054831	1.20605	0.001195	Inter-alpha-trypsin inhibitor heavy chain H4	2102.3	2159.2	2046.2	2077.5	2198	2272.7	2518.2	2474.5	2614.7
CAFS_HM_T_00054819	1.20602	0.000179	Inter-alpha-trypsin inhibitor heavy chain H3	1079.8	1087.3	1088.4	1207.8	1158.9	1236.1	1340.3	1284.9	1301
CAFS_HM_T_00021860	1.20577	0.021368	Zinc transporter 6	47.1	40.1	44.5	46.4	48.8	49.5	50.2	54.1	54.5
CAFS_HM_T_00090403	1.20523	0.005301	RNA polymerase II-associated protein 1	319.1	333.5	303.9	340.1	349.9	393.2	367.9	394.3	390.6
CAFS_HM_T_00050376	1.20448	0.005679	Ubiquitin-conjugating enzyme E2 G1	54.9	57.1	57.7	57.4	62.8	60.9	68	64.8	71.6
CAFS_HM_T_00069566	1.20424	0.000138	Cytochrome P450 4V3	3860.3	3918	3984.3	4101	4180.6	4463.7	4689.5	4806.6	4668.9
CAFS_HM_T_00068649	1.20335	0.004922	Selenocysteine insertion sequence-binding protein 2	190.3	177.3	187.6	210.7	190	210.2	225.4	212.3	230.4
CAFS_HM_T_00067847	1.20277	0.004476	General transcription factor IIH subunit 2	468.1	454.4	442.1	458.6	473	439.2	574.1	540.7	526.5
CAFS_HM_T_00028125	1.2027	0.013547	C-Myc-binding protein	109.4	126.4	119.4	117	133.2	137.1	144.3	136.8	146.1
CAFS_HM_T_00007135	1.20223	0.000639	Cytosolic purine 5&apos;-nucleotidase	825.6	854.6	823.9	908.4	882	867	1031.6	994.3	984.6
CAFS_HM_T_00048267	1.20223	1.2e-05	Peroxisomal acyl-coenzyme A oxidase 3	9533.1	9492.3	9658.7	10254	10139.6	10568	11427.4	11458.1	11599.3
CAFS_HM_T_00053010	1.20211	2.96e-05	Monoacylglycerol lipase ABHD6	2181	2149.5	2120.1	2317.9	2270.2	2394.5	2601.9	2565.2	2587.2
CAFS_HM_T_00024851	1.20186	0.000592	Complement factor I	4720.9	4611.3	4771.9	4708.4	4862	4750.5	5794.7	5651.7	5504.7
CAFS_HM_T_00078438	1.20167	0.008548	UDP-glucuronosyltransferase 2A3	1041	1017.2	918.4	1127.1	1064.1	1131.4	1204.5	1157.2	1215.2
CAFS_HM_T_00071323	1.20127	0.001321	Tripartite motif-containing protein 2	421.6	428.8	428	484.1	459	459.7	527.7	515.9	492.1
CAFS_HM_T_00068323	1.20121	8.12e-06	Elongation factor 2	4495.5	4404.3	4424.3	4918	4843.3	4931.6	5350.1	5345.6	5309.3
CAFS_HM_T_00075110	1.20087	0.006309	Putative RNA polymerase II subunit B1 CTD phosphatase RPAP2	68.9	69.7	67.5	77.2	70	75.1	85	77.4	85.1
CAFS_HM_T_00086636	1.20074	0.027987	Diphthamide biosynthesis protein 1	105.2	103.6	87.6	103.7	111.2	122.8	115.5	118.9	121.5
CAFS_HM_T_00076880	1.20073	2.18e-05	Sterol 12α-hydroxylase	7165.3	7014.7	7210.2	7389.9	7458.2	7646.6	8530.1	8601.1	8552.7
Down-regulated
Protein	Fold Change	P.value	Annotation	ck_0h_1	ck_0h_2	ck_0h_3	hy_5h_1	hy_5h_2	hy_5h_3	re_5h_1	re_5h_2	re_5h_3
CAFS_HM_T_00063524	0.112605	0.004925	Papilin	1561.9	1534.5	1262.2	425.5	944.9	294.4	182.5	166.4	141.9
CAFS_HM_T_00025305	0.141529	0.001186	Perforin-1	1445.3	1341.3	1495.2	1353	590.1	673.6	203.7	210.6	191.7
CAFS_HM_T_00049915	0.145942	0.00912	Gastrotropin	15617.1	19717.4	15473.9	5648.2	3183	3068.2	2448.8	2469.3	2497
CAFS_HM_T_00003287	0.177816	0.009065	Bitisilin-3 (Fragment)	1901	1852.9	1461.6	646.9	789.5	434.3	304.4	294.5	328.5
CAFS_HM_T_00029368	0.180116	0.001091	Anterior gradient protein 2 homolog	2280.5	2441.6	2205.1	1076.8	2134.1	760.3	435.1	413.8	398.8
CAFS_HM_T_00074738	0.181114	0.004285	Claudin-15	1776.7	1756.3	1477.1	569.6	1237.5	443.1	324.4	306.6	276.4
CAFS_HM_T_00071322	0.181786	4.22e-08	Nattectin	3520.3	3518.5	3581.4	856.2	863.9	666.1	613.1	647.1	670.4
CAFS_HM_T_00000241	0.203373	0.006182	Calponin-1	8463.6	9304.7	7429.3	4018.3	5799	2615.3	1778.1	1730.8	1615.6
CAFS_HM_T_00015695	0.21209	4.82e-05	--	4529	4500.9	3974.5	1827.8	2839.3	1459.3	964.5	928.4	865.2
CAFS_HM_T_00069183	0.218923	0.007119	Smoothelin	1590.2	1723.1	1361.4	767.7	1359.4	538.1	351	323.1	349.3
CAFS_HM_T_00019903	0.22033	0.003505	Cysteine and glycine-rich protein 1	3527.9	3755.1	3157.7	1834.6	3226.6	1251.3	797.7	786.1	716.6
CAFS_HM_T_00089830	0.238427	0.000155	Protein KIAA0284	360	374.6	313.1	173.4	293.7	119.7	90.7	84.3	74.8
CAFS_HM_T_00037345	0.238932	0.004786	Four and a half LIM domains protein 1	3836.3	4088.9	3373	1888.6	2536	1296.1	938.7	909.7	851.1
CAFS_HM_T_00063662	0.245646	0.000266	Caldesmon	4608.2	5209.5	4225.3	2573.1	4314.6	1738.8	1206.3	1200.3	1043
CAFS_HM_T_00031462	0.248144	0.003769	Fatty acid-binding protein, brain	633.5	655	557.2	286.9	394.7	210.1	152.2	158.3	147.5
CAFS_HM_T_00036108	0.248786	4.76e-05	PDZ and LIM domain protein 3	2893.6	3050	2662.2	1590.4	2402.2	1065.2	757.9	701.1	682
CAFS_HM_T_00016361	0.250992	6.46e-05	Desmin	16367.3	17210.9	14929.3	9211.4	17716.5	6305	4457.9	3951.7	3765.4
CAFS_HM_T_00054528	0.254319	5.09e-07	VIP peptides	1573.4	1541.2	1510.7	745.7	1136.6	560.6	407.3	384	385
CAFS_HM_T_00001890	0.259467	0.00099	Uromodulin	967.4	1053.6	986.7	324.6	287.5	291.1	258.9	254	267.5
CAFS_HM_T_00078073	0.28476	1.87e-06	Erythroid membrane-associated protein	14552.2	14645.4	15273.6	5096.3	4823.2	4241.3	4010.2	4361.3	4292.1
CAFS_HM_T_00064560	0.287794	0.005451	Tenascin	3866.8	4109.5	3394.7	1900	2733.5	1392	1117.4	1114.4	1040.7
CAFS_HM_T_00087448	0.290096	0.00015	Transgelin-3	12947.7	13942.8	11721.5	7538.6	11382.6	5461.2	3877.2	3806.8	3517.2
CAFS_HM_T_00015543	0.290498	8.8e-09	Beta-galactoside-binding lectin	2959.9	2950	2947.3	1978.8	2408.4	1327.1	877.5	860.6	834.9
CAFS_HM_T_00006815	0.291158	0.002098	--	10752.9	11302.3	10011.6	5705.4	8688.1	4332.9	3178.2	3142.7	3015.6
CAFS_HM_T_00000627	0.297312	0.001483	NAD(P)(+)--arginine ADP-ribosyltransferase 2	2881.3	3064.1	2792.9	1145.9	1143.1	971.8	859.1	873.1	865.8
CAFS_HM_T_00019321	0.298516	5.51e-05	Intermediate filament protein ON3	5422.8	5616.3	4948.3	3594.4	4129.7	2901.6	1561.3	1703.5	1507.7
CAFS_HM_T_00057047	0.301546	0.000257	Protein kinase C and casein kinase substrate in neurons protein 1	253.8	263.7	219.7	116.4	301.1	105.3	82.9	70	69.4
CAFS_HM_T_00064123	0.305523	2.23e-05	Mucin-2	3546.5	3743.8	3377.3	2439.9	2676.9	1656.9	1127	1091	1041.2
CAFS_HM_T_00036138	0.30774	0.002979	Transforming growth factor-beta-induced protein ig-h3	5586.2	5923.3	5134.1	3269.4	4420.1	2186	1756.6	1723.2	1642.1
CAFS_HM_T_00019364	0.310199	9.09e-06	Myosin light polypeptide 6	4545.5	4721.4	4380.8	2770.7	4764.8	2070.3	1482.4	1436.4	1314.7
CAFS_HM_T_00059115	0.313432	2.1e-05	Pentraxin fusion protein	1026	1108	1036.7	382.7	406.2	344.7	350.2	348.6	295
CAFS_HM_T_00078506	0.318329	9.08e-05	Villin-1	6925.1	7323.4	6340.9	3974	7084	3267.1	2297.2	2199.8	2057.2
CAFS_HM_T_00025386	0.320483	1.57e-05	Hemagglutinin/amebocyte aggregation factor	2679.2	2694.5	2896	2589.2	1350.2	1334.4	864.4	940.2	845.7
CAFS_HM_T_00084880	0.321307	0.000223	Cadherin-17 OS=Homo sapiens GN= PE=1 SV=3	4202.5	4212.4	3578.6	1794.9	3232.8	1635.3	1306.4	1345.5	1201.7
CAFS_HM_T_00065764	0.325414	0.000327	Protein phosphatase 1 regulatory subunit 14A	64.6	63	53.4	49.2	54	33.6	19.4	20.7	18.8
CAFS_HM_T_00072803	0.330417	0.00427	SAM domain and HD domain-containing protein 1	1470.9	1587.3	1353.8	680	1033.1	556.3	498.2	472.6	487
CAFS_HM_T_00049946	0.332214	0.008517	Mammalian ependymin-related protein 1	695	772.9	616.9	316.1	294.4	257.8	240	231.7	220.9
CAFS_HM_T_00009938	0.33487	8.62e-05	Glial fibrillary acidic protein (Fragment)	3457.2	3634.4	3165.8	2184.7	3340.2	1574.5	1211.2	1128.4	1095.3
CAFS_HM_T_00031182	0.336479	0.005942	Collagen alpha-1(XII) chain	21965.8	22904.2	19169.1	11948.1	15343.1	8659	7345	7179.5	7023.3
CAFS_HM_T_00061908	0.336736	4.28e-05	Harmonin	500.5	511.5	457.4	273.8	401.4	221.3	167.5	169.2	158.1
CAFS_HM_T_00016615	0.346536	4.65e-05	Myosin-11	36161.2	37504.7	33427.1	23143.7	37528.9	17873.6	12838.6	12458.2	11814.8
CAFS_HM_T_00065290	0.346648	4.71e-07	Chymotrypsin-like elastase family member 2A	683.1	697.2	697.6	1261.5	585	604.3	239.7	250.5	230.1
CAFS_HM_T_00028679	0.347295	3.12e-05	Protein S100-A1	625.8	653.7	587.5	332.7	442.1	281.7	210.5	221.8	216.1
CAFS_HM_T_00023205	0.348848	3e-05	Creatine kinase, testis isozyme	8254.1	8375.3	7622.7	4885.6	8984.3	4263.7	2993	2771.4	2695.9
CAFS_HM_T_00071321	0.349866	0.000124	Protein disulfide-isomerase	13979.5	13445.7	15482.4	15220.3	8429.7	8783.4	4773.9	5319.7	4918.3
CAFS_HM_T_00016367	0.351195	5.9e-05	Myosin light chain kinase, smooth muscle	8206.3	8572.8	7600.5	5166.4	8346.6	4081.9	2989.2	2883.2	2689.6
CAFS_HM_T_00057454	0.355247	2.83e-05	Myosin regulatory light polypeptide 9	1184	1231.1	1115.4	750.6	1206.3	562.1	411.1	440.4	402.7
CAFS_HM_T_00070702	0.356121	0.005903	SAM domain and HD domain-containing protein 1	2533.4	2748.8	2311	1401.1	1214.3	1133.9	891.8	907.3	905
CAFS_HM_T_00077336	0.357572	0.00225	Pancreatic alpha-amylase	5812.2	5524.1	6207	7633.5	4382.4	4276.3	2069.1	2153.3	2050.6
CAFS_HM_T_00020983	0.359313	0.000167	Vinculin	4966.9	5171	4420.7	2885.5	4901.9	2363.5	1794.1	1776.9	1660.1
CAFS_HM_T_00020610	0.360734	5.9e-06	Alpha-actinin-1	7010.9	6998.5	6641.8	5077.6	7488.2	3661.5	2594.5	2495.2	2359.9
CAFS_HM_T_00040368	0.361299	7.63e-05	Phosphoglucomutase-like protein 5	5652.1	5894.1	5187.6	3692.5	5165.1	2904.8	2044.5	2089.2	1912.2
CAFS_HM_T_00067845	0.387592	0.012638	N-acetylated-alpha-linked acidic dipeptidase-like protein	108.3	134.3	108.8	90.2	105.4	72.9	47.2	46	43
CAFS_HM_T_00012708	0.387645	0.000117	N-acetylmuramoyl-L-alanine amidase	1565.9	1450.6	1657.1	2915.3	1704.5	1545.1	562.9	640.4	608.4
CAFS_HM_T_00090259	0.388264	1.11e-05	Deleted in malignant brain tumors 1 protein	392.5	418.4	399.1	266.2	204.2	189.5	164.8	156.7	148.3
CAFS_HM_T_00062644	0.390195	2.54e-06	Mucin-2	601.4	615.1	633.6	334.5	276.4	274.7	240.9	244.4	236.6
CAFS_HM_T_00061616	0.390892	5.8e-05	Carboxypeptidase B	3939.7	3740.2	4197.3	5400.5	2925.4	2983.8	1494.4	1560.2	1588.1
CAFS_HM_T_00003130	0.393427	0.000472	Endonuclease G, mitochondrial	266.4	258	309.3	353.1	205.1	196.2	107.5	105.8	114.7
CAFS_HM_T_00038174	0.396314	0.000468	AMP deaminase 1	134	160.4	156	81.1	118	65.9	64.2	59.9	54.4
CAFS_HM_T_00023593	0.396768	0.003831	Collagen alpha-4(VI) chain	4212.4	4526.8	3945.8	2432	2876.8	1828.6	1690.6	1706.4	1636
CAFS_HM_T_00076598	0.399543	0.00536	Apoptosis-associated speck-like protein containing a CARD	727.8	734.5	638.6	379.3	568.6	359.5	280	279.6	279.8
CAFS_HM_T_00056393	0.399773	2.41e-05	Filamin-A	33390.2	34280	31340.6	22439.1	30422.8	17909.8	13514	13197.2	12870.6
CAFS_HM_T_00000672	0.399856	0.005482	Butyrophilin-like protein 3	329.4	348.8	295.9	181	224.3	141.3	126.1	133.6	129.8
CAFS_HM_T_00080753	0.401626	4.69e-05	Collagen alpha-3(VI) chain	7644.2	7710.3	6982.2	5147.6	6437.7	3748.6	3033.6	3036.5	2900.9
CAFS_HM_T_00054153	0.403817	0.004876	Plasticin	1496.9	1600	1372.7	1218.2	1372.1	831.2	603.2	615.1	586.6
CAFS_HM_T_00051663	0.407599	3.33e-06	Complement factor B	762.3	762.2	739	351.9	341.2	306	302.9	325.7	294
CAFS_HM_T_00036899	0.407935	5.88e-05	PDZ and LIM domain protein 7	2675.3	2687.1	2438.6	1730.8	2784	1321.8	1118.8	1049.7	1013.8
CAFS_HM_T_00024483	0.408932	9.27e-07	Decorin	3002.2	2991	3036.9	2627.3	2787.2	1827	1239.1	1282.6	1171
CAFS_HM_T_00017489	0.41078	2.84e-05	Poly(U)-specific endoribonuclease-A	2393.6	2260.6	2464.7	3029.1	1740.1	1704.3	925.6	1016.6	982.1
CAFS_HM_T_00023588	0.412472	0.000113	Collagen alpha-6(VI) chain	1445.2	1562.5	1374.9	822.8	1024.1	659.6	600.1	631.4	576.2
CAFS_HM_T_00049241	0.416485	0.000534	Synaptopodin-2	454.3	476.1	398.1	312.6	489.1	220.3	188.9	200	164.4
CAFS_HM_T_00017150	0.417129	0.007433	Myosin-VIIa	1259.1	1369.9	1136.5	804.5	971.9	663.3	534.4	531.9	504.4
CAFS_HM_T_00071538	0.420603	1.9e-05	PDZ and LIM domain protein 3	2912.3	3041.5	2817.9	1995.8	3243.6	1656.8	1242.5	1275.3	1171.6
CAFS_HM_T_00071147	0.422662	0.011151	Sodium/potassium-transporting ATPase subunit alpha-1	5009.5	4722.1	4026.2	2392.9	3113.8	2106.7	1915.1	2003.9	1895.9
CAFS_HM_T_00045368	0.423323	2.65e-06	Prostaglandin reductase 1	1372	1419.7	1356.2	663.6	780.7	707.9	574	600	581.9
CAFS_HM_T_00060769	0.42435	0.000122	Vimentin	2398.5	2516.1	2208.3	1796.9	2160.9	1272.9	1042.4	1015.3	964.9
CAFS_HM_T_00080750	0.427126	0.0002	Collagen alpha-3(VI) chain	3126.5	3215.1	2787.8	2149.1	2800.4	1551.6	1314.1	1344.1	1241.2
CAFS_HM_T_00086375	0.432089	9.18e-06	Calcium-activated chloride channel regulator 4	572.2	586.6	611.9	292.3	282.3	264.1	250.8	256	258.3
CAFS_HM_T_00084915	0.433501	0.000627	Trypsin-1	6358.9	6136.9	7338.3	9155.9	5330.8	5557.3	2657.8	3033.6	2906.7
CAFS_HM_T_00006239	0.434957	0.007954	Deoxyribonuclease gamma	857.8	872.1	735.4	487.9	673.7	439.6	348.9	366.4	357
CAFS_HM_T_00067712	0.435461	0.000752	--	713.1	714.2	598.6	546	482.2	404.2	282.8	323.4	276
CAFS_HM_T_00043487	0.438127	7.33e-06	Vesicle transport through interaction with t-SNAREs homolog 1A	204.9	196.3	207.3	130.9	209.1	126.4	88.4	92.2	86
CAFS_HM_T_00013735	0.440848	3.19e-05	Deoxyribonuclease-1	560.7	554.2	596.8	812.8	439.1	456.7	241	266.8	246.8
CAFS_HM_T_00000968	0.440903	0.007229	Sucrase-isomaltase, intestinal	880	875.9	1017.5	1174.1	689.9	677.4	400.7	419.7	402.4
CAFS_HM_T_00051769	0.441097	8.66e-06	Syncollin	1359.6	1307	1352.7	1256	868.5	817.5	578.5	630.3	564.1
CAFS_HM_T_00002920	0.44168	6.71e-05	DLA class II histocompatibility antigen, DR-1 beta chain	1128.6	1039.4	1063.3	721.6	767.4	636.4	439.1	517.1	471
CAFS_HM_T_00004025	0.443063	0.000525	Smoothelin-like protein 1	1159	1346.4	1146.9	870	1125.5	679.5	553.3	558.2	506.7
CAFS_HM_T_00062638	0.443723	9.4e-07	Intestinal mucin-like protein (Fragment)	1563.3	1621.3	1605.1	1284	1252.6	953.6	714.9	708.5	701.9
CAFS_HM_T_00061081	0.444721	0.000127	LIM domain-containing protein 2	189.9	196.7	175.1	139.3	191.1	108	87.2	85.5	77.1
CAFS_HM_T_00062604	0.445697	0.000122	Galanin	626.5	673.7	651.8	566.2	393.1	435.1	249.7	306.4	313.9
CAFS_HM_T_00030303	0.451873	0.00024	Keratin, type I cytoskeletal 50 kDa	3633.8	3591.2	3212.9	2422	2726.1	2271.7	1563.4	1706.1	1447.1
CAFS_HM_T_00087429	0.456443	7.62e-05	Chymotrypsin-like protease CTRL-1	1177.1	1079.9	1192.5	1388.2	824	814.9	508.2	550.2	516.1
CAFS_HM_T_00016209	0.457087	0.000119	Endoplasmic reticulum resident protein 27	4437.6	4337.4	4804.9	6240.7	3417.7	3560.5	1950.9	2231.6	2024.7
CAFS_HM_T_00071824	0.459826	0.000143	Synaptopodin-2	1562.2	1632.1	1436.8	1108.2	1869.4	900.7	736.9	700.2	692.4
CAFS_HM_T_00003950	0.466461	5.04e-05	GTP:AMP phosphotransferase, mitochondrial	1867	1928.6	1753.2	1256.4	1618.3	1095	853	891.4	843.9
CAFS_HM_T_00055315	0.468123	0.000908	Acidic mammalian chitinase	3105.6	3144.3	2973.1	2063.4	1632.9	1617.8	1429.1	1446	1442.4
CAFS_HM_T_00005053	0.469066	3.89e-06	Elastase-1	3734.2	3632	3785.1	5010.1	2972.6	2907.7	1689.9	1805	1735.8
CAFS_HM_T_00052290	0.469875	8.94e-06	Bile salt-activated lipase (Fragment)	1964.9	1962.9	2015.7	3449.2	1671.7	1676.7	882.8	992.7	917.2
CAFS_HM_T_00078456	0.471411	0.000296	Tensin	614	613.5	538.9	433	558.3	330.1	290.8	261.4	280.5
CAFS_HM_T_00013573	0.472132	2.27e-06	Coronin-1C	2330.7	2412	2374.8	1581	1849.3	1357.7	1090.9	1159.3	1110.2
CAFS_HM_T_00050945	0.472203	7.16e-06	Vitelline membrane outer layer protein 1 homolog	286.1	283.2	276.1	141.3	165.8	136.7	140.8	128	130.4
CAFS_HM_T_00013964	0.475219	0.002086	Sodium channel protein type 4 subunit alpha B	19.8	24.3	24.5	16.8	26.9	12	11.9	11.2	9.5
CAFS_HM_T_00067068	0.478876	0.000216	Dehydrogenase/reductase SDR family member 11	331.5	355.3	309.7	208.6	284.4	193.3	152.7	162.7	161.8
CAFS_HM_T_00037707	0.479694	0.000121	Chymotrypsin-like elastase family member 2A	2667.9	2570.8	2881.9	3662.3	2297.9	2226.7	1255	1340.8	1299.6
CAFS_HM_T_00022859	0.480144	0.000528	--	498.2	537.9	467.2	774	532.4	643.7	225.5	271.5	224.8
CAFS_HM_T_00024484	0.480261	4.53e-06	Lumican	5159.2	5063.6	4917.5	3945.9	4467.1	3058.9	2362.1	2436.9	2472.3
CAFS_HM_T_00053251	0.481647	2.2e-05	Collagen alpha-1(VI) chain	11110.9	11377.9	10569.2	8295	9736.1	6398.6	5307.7	5445.2	5169.4
CAFS_HM_T_00047133	0.481736	2.8e-05	Chymotrypsin A	2626.8	2601.5	2781.9	3227.4	2184.1	2183.3	1241.3	1346.8	1270.7
CAFS_HM_T_00014424	0.482108	9.83e-06	Metalloproteinase inhibitor 2	714	710.6	738.4	509.8	431.8	430.2	331.5	345	366.3
CAFS_HM_T_00083198	0.487858	0.000143	Trypsin-3 (Fragment)	1381.5	1311.6	1470.2	2021.5	1241.1	1202	646.4	714.6	670.1
CAFS_HM_T_00037535	0.489075	0.000254	Glucosamine-6-phosphate isomerase 1	2671.5	2823.6	2450.3	1675	1774.2	1516.9	1336.2	1277.1	1272.6
CAFS_HM_T_00009179	0.489655	0.000614	Ribonuclease-like 3	2992.4	2824.5	3337.7	1547.3	1406.9	1332.7	1428.9	1594.1	1459.6
CAFS_HM_T_00069919	0.490336	6.28e-05	Complement C3 (Fragment)	307	303.6	331	159.6	172.3	152.1	147.9	155.9	157.9
CAFS_HM_T_00044792	0.49091	0.000123	Low choriolytic enzyme	1289.8	1305	1431.4	1722.6	1232.1	1111.6	640.7	679.9	655.9
CAFS_HM_T_00055249	0.492094	0.000221	Leiomodin-1	748.7	741.8	666	525.7	679.1	437.6	364.9	364.8	331.5
CAFS_HM_T_00047132	0.493743	0.003464	Chymotrypsin A	2123.8	2089.3	2307.3	2846.2	1797.4	1821.1	1067	1087.2	1065.2
CAFS_HM_T_00053842	0.495023	7.97e-06	Keratin, type I cytoskeletal 50 kDa	2801.9	2936.4	2800.9	2379.2	2746.1	1895.5	1374.8	1440.9	1411.4
CAFS_HM_T_00011946	0.495677	0.002379	Maltase-glucoamylase, intestinal	3118.4	3334.9	3078.1	2989.5	3255.6	2090.4	1576.9	1564.9	1582.7
CAFS_HM_T_00044890	0.495947	0.000676	Chymotrypsin B	995.3	975.8	1137.7	1349.5	927.9	884.8	497.6	553.6	490.6
CAFS_HM_T_00077787	0.505085	1.53e-05	Protein FAM49B	452.1	429.5	426.1	342.1	405.6	295.5	225.6	219	215.9
CAFS_HM_T_00043946	0.505706	3.4e-05	Actin, aortic smooth muscle	2767.7	2923.1	2712.1	2006.3	2493.9	1653.9	1461	1412.8	1375.6
CAFS_HM_T_00074898	0.508989	0.006228	Plastin-1	26.5	34.9	27.6	21.1	20.8	16.4	16.5	13.6	15.2
CAFS_HM_T_00008287	0.510507	5.63e-05	Keratin, type I cytoskeletal 17	1256.9	1321.7	1204.7	779.8	1021.7	796.7	654.2	643.2	634
CAFS_HM_T_00001210	0.511514	0.000434	--	1728.7	1619.2	1793.5	1498.3	1700.6	1615.7	994.3	801.9	833.7
CAFS_HM_T_00007071	0.511764	2.46e-05	Integrin alpha-1	4281.2	4418.3	4128.3	3084.8	4314.9	2710.1	2232.7	2230.2	2101.9
CAFS_HM_T_00009810	0.511887	0.002189	Isocitrate dehydrogenase [NADP], mitochondrial	9242.6	9244	8580.7	6081	7225.7	5233.9	4669.5	4572.3	4613.6
CAFS_HM_T_00063794	0.512201	1.54e-05	Caveolin-2	397.9	419.3	416.3	372.5	379.2	289.1	215.7	214.4	201.7
CAFS_HM_T_00045016	0.51439	5.21e-06	CD81 antigen	1239.3	1248.7	1250.8	960.5	1030.1	805.1	608.6	671.4	643.2
CAFS_HM_T_00053902	0.515232	0.002492	--	124.6	137.4	112.2	122.8	108	81.2	60.7	74.5	57.6
CAFS_HM_T_00006283	0.515411	0.000225	--	411.6	409.8	450.4	342.8	376.8	349.6	236.9	212.6	206
CAFS_HM_T_00073455	0.521001	0.00031	--	113.2	120.6	113.8	68.3	80.4	78.5	63.4	65.5	52.2
CAFS_HM_T_00077112	0.521035	0.000165	Annexin A13	239.5	215.1	218.1	186.4	207.3	147	119.9	114.6	116
CAFS_HM_T_00009527	0.525409	0.037848	Hepatoma-derived growth factor-related protein 3	551.7	749.8	579.7	805.5	444.8	470.3	314	347.3	327.1
CAFS_HM_T_00053257	0.531231	1.27e-05	Collagen alpha-2(VI) chain	14019	14170.9	13392.6	10386.9	12328.3	8563.7	7304.2	7503.3	7282.4
CAFS_HM_T_00073666	0.533612	0.00435	Protein disulfide-isomerase	1902.9	1979.8	1771.6	1239.2	2147.6	1188.1	1019	996.8	1001.4
CAFS_HM_T_00005243	0.535332	0.029099	Glucagon	67.3	64.8	54.7	190.1	39.8	76.9	26	25.1	48.9
CAFS_HM_T_00091181	0.535434	1.71e-05	Collagen alpha-1(XII) chain	4404	4535.4	4319	4071.3	4597.7	3018.6	2472	2348.4	2278.6
CAFS_HM_T_00062345	0.540385	1.28e-05	Carboxypeptidase A1	2251.2	2212.4	2331	2808	1673	1679.5	1216.3	1260.4	1195
CAFS_HM_T_00036396	0.542422	0.000492	ES1 protein homolog, mitochondrial	5855.4	5645.1	5092.5	3511.1	3680.1	3210.2	2891.8	3178.3	2930.3
CAFS_HM_T_00065868	0.542959	8.73e-05	--	1652.1	1686.6	1780.1	976.3	1062.5	950.9	981.7	918.1	879.5
CAFS_HM_T_00040732	0.544226	0.000129	Vinexin	1367.5	1379.8	1256	957.9	1246.4	870.4	716.9	753.6	708.2
CAFS_HM_T_00033277	0.547011	0.000796	Uncharacterized transmembrane protein C1orf95 homolog	343.3	353.6	301.8	270	305.3	220.7	187.1	186.4	172.8
CAFS_HM_T_00057072	0.548619	0.003814	Zinc-binding protein A33	78.3	76.5	95.1	51.2	65.8	54.1	41.8	47.8	47.5
CAFS_HM_T_00063792	0.552483	0.000187	Caveolin-1	1452	1443.4	1314.5	1289.8	1278.1	1027.6	765.7	807.2	753
CAFS_HM_T_00017479	0.553034	0.00157	Keratin, type I cytoskeletal 18	6208.5	6301.7	5936.6	5693	5773.6	4192.9	3402	3405.7	3394
CAFS_HM_T_00085027	0.55592	3.35e-05	--	3830.5	3875.8	4016.6	3225	2622.9	2553.3	2159.8	2288.1	2069.1
CAFS_HM_T_00032279	0.556419	4.31e-05	Leukocyte elastase inhibitor	1804.8	1802.2	1705	1425.8	1703.1	1319.3	991.2	1024	940.5
CAFS_HM_T_00015573	0.55921	4.35e-05	Rho GDP-dissociation inhibitor 2	1207.1	1174.4	1151.7	943.6	1128.2	818.9	693.3	664	618.5
CAFS_HM_T_00041460	0.559317	0.004907	--	264.1	237.3	242.9	149.5	133.2	164.5	139.9	139.8	136.6
CAFS_HM_T_00031086	0.5603	0.000142	Cathepsin B	291	302	273.5	183.6	157.4	153.8	161	167.9	156.6
CAFS_HM_T_00009924	0.56349	0.001478	Aminopeptidase N	436.2	459.5	380.1	298.2	345.5	261	243.5	243.6	231.8
CAFS_HM_T_00061499	0.563496	1e-05	Polymerase I and transcript release factor	3344.1	3430.7	3323.4	2967.5	2982.6	2476.2	1873	1977.6	1839.7
CAFS_HM_T_00061797	0.56649	0.00018	Filamin-C	5983.2	6273.6	5621.9	4384.3	5455.9	3836.8	3376.1	3447.8	3304.2
CAFS_HM_T_00012823	0.567019	0.000158	Ankyrin repeat and SAM domain-containing protein 4B	577.6	588.2	535.2	437.1	466.6	365	335.6	317.5	311.4
CAFS_HM_T_00046550	0.567736	0.000436	Epidermis-type lipoxygenase 3	2768.3	2773.2	3108.3	1657.7	1533.1	1449.7	1579.1	1685.5	1646.2
CAFS_HM_T_00052401	0.571843	6.1e-05	Collagen alpha-1(V) chain	648.2	617.8	627.7	485.8	571.8	433.5	336.5	377.3	369.1
CAFS_HM_T_00009032	0.571952	2.71e-06	Fibrillin-2	913.9	937	903.7	690.8	823.1	585.9	527.9	519.9	527.7
CAFS_HM_T_00002918	0.573017	0.00901	HLA class II histocompatibility antigen, DP alpha 1 chain	1332.1	1176.2	1340.8	1014.8	965.2	942.9	741.7	737.5	726.4
CAFS_HM_T_00045157	0.574092	0.000468	Annexin A2-B	2325.4	2347.6	2089.5	1331.5	1644.6	1297.8	1276.1	1369.8	1236.4
CAFS_HM_T_00001251	0.576161	1.53e-06	Receptor-type tyrosine-protein phosphatase C	442.5	447.7	447.1	326.7	396.5	289.3	259.1	262.2	249.2
CAFS_HM_T_00085124	0.577065	3.12e-05	Apoptosis-associated speck-like protein containing a CARD	174.8	173.6	166.1	113.5	146.3	104.6	98	103.1	95.8
CAFS_HM_T_00009324	0.577267	1.63e-05	EH domain-containing protein 2	2503.8	2544.2	2598.2	2180.6	2403.4	1864.9	1442.8	1539.6	1431.5
CAFS_HM_T_00062063	0.579395	6.51e-06	Annexin A2	7028.7	7113.5	7265.3	6430.4	6221.4	5509.1	4027.9	4261	4114.5
CAFS_HM_T_00040682	0.579546	0.000385	N-acylglucosamine 2-epimerase	1153.2	1225.4	1082.9	788.8	773.2	700.4	675.4	691.8	638.9
CAFS_HM_T_00080171	0.585376	5.1e-07	Plastin-2	7737.7	7661.2	7788.4	5813.9	6352.4	5197	4478.4	4604.9	4490
CAFS_HM_T_00028635	0.586402	8.67e-05	--	1032.7	1029.8	970.4	806.7	839.5	709.3	568.5	623.4	586.6
CAFS_HM_T_00081409	0.587087	0.004952	Na(+)/H(+) exchange regulatory cofactor NHE-RF3	353.2	395.8	316.6	351.4	449.4	264.5	223.8	218.3	183.5
CAFS_HM_T_00069658	0.587225	1.18e-07	Annexin A5	4473.3	4476.9	4442.1	3607.4	4010.9	3157.8	2646	2633.9	2584.4
CAFS_HM_T_00044782	0.589513	0.000159	Low choriolytic enzyme	646.1	659.2	706.7	412	394.7	409.9	380.5	399.8	405.8
CAFS_HM_T_00020682	0.590365	1.74e-06	Cystatin	1196	1172.4	1172.8	874.4	769.3	752.8	681.7	709.3	699.6
CAFS_HM_T_00087865	0.59158	3.72e-05	Periostin	1946.8	1944.3	1831.2	1422.4	1343.5	1156.9	1143.6	1114.4	1127.2
CAFS_HM_T_00056473	0.592295	1.48e-06	Alpha-enolase	2194.1	2205.2	2149.8	1715.4	1844.5	1549.6	1272.4	1300.8	1305.8
CAFS_HM_T_00024622	0.593294	0.000125	Beta-2-microglobulin	1313.3	1297.8	1212.3	933.9	1000	870.1	747.1	787.5	733.8
CAFS_HM_T_00092100	0.594356	0.00608	Cathepsin L1	20.6	16.8	19.3	12.8	10.5	10.7	9.4	12	12.3
CAFS_HM_T_00063980	0.594368	0.000186	Olfactomedin-4	274.9	281.8	302.7	165.5	166.1	156.8	165.1	172.4	173.3
CAFS_HM_T_00045124	0.594509	9.26e-06	Retinal dehydrogenase 2	5478.7	5555.4	5330.5	4274.3	4739.6	3984.5	3320.1	3232.2	3176.6
CAFS_HM_T_00065854	0.59456	0.000205	Myosin-Ic	1944.8	2010.9	1827.4	1729.5	1800.5	1429.2	1153.6	1189.8	1095
CAFS_HM_T_00052040	0.595713	0.001079	Guanine nucleotide exchange factor VAV2	67.9	62.8	69.9	50.3	59.1	47.9	40.7	35.3	43.5
CAFS_HM_T_00079607	0.596273	0.000254	Collagen alpha-2(IV) chain	992.6	1031.6	938.2	795.8	932.4	674.6	553.3	601.5	611.6
CAFS_HM_T_00015520	0.596388	5.57e-05	Ras-related C3 botulinum toxin substrate 2	730.5	751.2	721.9	555	619	462.3	465.9	426.1	422.2
CAFS_HM_T_00059585	0.59692	0.003058	Lysozyme-like protein 1	7167.1	6736	8184.8	4256	3956.2	3832	4078.1	4426.8	4679.8
CAFS_HM_T_00015863	0.597874	1.7e-06	Myosin light chain 4	357.1	366.7	358.2	289.8	369.5	247.9	217.2	212.8	216.9
CAFS_HM_T_00029421	0.59955	0.000159	Adseverin	368.2	382.6	360.2	376.6	467.3	325.6	229.4	231.6	205.1
CAFS_HM_T_00044638	0.600699	0.000893	Neutrophil cytosol factor 2	206.1	235	216.8	164.3	145.9	145.9	122.4	140.1	132.7
CAFS_HM_T_00004034	0.602105	4.58e-05	Myeloperoxidase	6679	6702.3	6881.1	4477.3	4048	3849.6	3832.1	4101	4267
CAFS_HM_T_00011231	0.604229	0.002427	Uncharacterized protein C19orf47 homolog	118.7	116.2	100.9	84.4	102.8	75.1	71.1	60.9	70.9
CAFS_HM_T_00051160	0.605883	9.95e-05	PDZ and LIM domain protein 4	1923.1	1984.2	1821.2	1599.9	1950.9	1428.4	1159.3	1170.9	1140.6
CAFS_HM_T_00031650	0.607326	0.000127	Calcium-binding mitochondrial carrier protein SCaMC-1	1089.3	1081.3	1004.3	827.2	965.7	768.7	655.9	645.5	626.8
CAFS_HM_T_00076677	0.607776	0.000797	Integrin beta-1	2627	2613.5	2527	2135.5	2677.8	1841.9	1570.3	1581.8	1568.8
CAFS_HM_T_00029830	0.608578	0.000231	Phosphatidylserine synthase 1	87.2	88.3	83.3	71.8	90.1	58.4	54.2	55.2	48.1
CAFS_HM_T_00065317	0.609121	2.99e-05	Annexin A1	4143.5	4232.3	4312	3959.9	3682.9	3275.3	2560.5	2689.6	2478.3
CAFS_HM_T_00085742	0.609499	0.000308	Schwannomin-interacting protein 1	399.5	401.7	384.2	588.2	382.6	435.7	216.8	252.8	252.9
CAFS_HM_T_00081886	0.609527	0.000787	Epidermis-type lipoxygenase 3	446.8	445.1	504.1	298	293.5	299.2	277	291.2	282.7
CAFS_HM_T_00020784	0.610976	1.27e-05	Reticulon-1-A	922.4	956.8	916	1041.5	805	746.2	570.7	578.2	558.9
CAFS_HM_T_00078462	0.611104	0.005107	Tensin-1	2168.2	2324.9	2113.3	1850.7	2222.7	1547.3	1338.7	1357.8	1340.7
CAFS_HM_T_00041640	0.612354	0.000865	Calcium/calmodulin-dependent protein kinase type II subunit beta	162.3	179.3	163.5	118.7	159.8	126.4	99.8	112.6	96.9
CAFS_HM_T_00007349	0.613485	0.003289	Integrin-linked protein kinase	5914.4	5989.5	5557.5	4579	5560.5	3976.4	3593.1	3565.8	3553.4
CAFS_HM_T_00008606	0.614332	0.000497	Laminin subunit alpha-3	675.6	696.6	623.3	494.3	626.9	441.6	388.5	429.8	407.6
CAFS_HM_T_00048762	0.614609	0.000226	Astrocytic phosphoprotein PEA-15	321.3	353.2	327.6	255.9	289.5	258.3	201.4	211.1	203.4
CAFS_HM_T_00011699	0.614649	7.08e-06	Coactosin-like protein	2839.4	2855.8	2934.6	2268.9	2759.3	2137.8	1729.9	1805.5	1768.9
CAFS_HM_T_00078168	0.614669	0.000817	Protein NLRC3	94.7	99	85.8	74.9	88.6	69.9	58.4	55.9	57.5
CAFS_HM_T_00045845	0.615202	0.019435	Collagen alpha-6(IV) chain	431.2	532.7	382	355.1	337	287.8	295.5	274.4	258.1
CAFS_HM_T_00076108	0.618707	0.000252	Protein NLRC3	145.7	146.8	140.5	106.9	117.6	100.6	97.3	84.4	86.2
CAFS_HM_T_00066046	0.619766	0.001176	Drebrin-like protein	613	673.3	583.6	675.6	697.8	556.3	381.6	407.8	369.5
CAFS_HM_T_00047867	0.620571	6.95e-05	Pro-interleukin-16	1138.8	1094.8	1079.8	823.3	839.9	725.6	655.7	714.8	685.7
CAFS_HM_T_00013316	0.621842	0.000164	Ig mu chain C region membrane-bound form	726.7	681.9	681	575.8	591.2	542.5	451.1	437.7	410.6
CAFS_HM_T_00017167	0.623511	0.000863	Lipoma-preferred partner	932.6	944.4	834.1	871.8	849.3	684.7	586.2	568.9	535.3
CAFS_HM_T_00084575	0.623969	0.000534	SH3 domain-containing kinase-binding protein 1	203.8	218.5	196	156	170.4	152	121.3	134.5	130
CAFS_HM_T_00081131	0.626181	8.1e-05	--	685.5	685.1	661.4	468.1	544.2	491.6	398	433.6	440.8
CAFS_HM_T_00088352	0.626415	0.000352	--	611.2	672.9	651.2	419.2	403.6	378.2	391.1	426.8	394.4
CAFS_HM_T_00039535	0.627203	1.54e-05	Chymotrypsin-like elastase family member 2A	640.6	634.2	648.5	945.1	628.8	614.2	395.3	419.3	391.7
CAFS_HM_T_00089128	0.62849	0.002354	Glia maturation factor gamma	1035	1023.1	1086.9	807	854.6	772.9	656.9	662.4	657.3
CAFS_HM_T_00091530	0.62981	0.001046	Kunitz-type protease inhibitor 1	584.8	600.2	540.6	446.4	514.9	418.5	356.2	395.2	335.4
CAFS_HM_T_00007095	0.632808	0.000407	Fish-egg lectin	460.8	413.8	444.6	355.5	383.7	375.9	288.1	268.9	277.8
CAFS_HM_T_00070745	0.633581	6.47e-05	Caspase-1	213.7	216.1	217	145.1	154.4	151.9	128.1	138.6	143.1
CAFS_HM_T_00068612	0.638699	0.026609	Endoplasmic reticulum aminopeptidase 2	1331.3	1550.2	1267.4	1312.9	1298.5	933.2	902.6	865.9	881.4
CAFS_HM_T_00056233	0.640675	0.030895	Bridging integrator 2	312.8	334.6	265.7	217.2	301	227.1	195.4	199.6	190
CAFS_HM_T_00005419	0.641413	0.000291	Receptor-type tyrosine-protein phosphatase C	373	397.6	367.2	304.9	309	287.6	255.3	242.4	232.1
CAFS_HM_T_00044017	0.641709	0.029223	LIM and SH3 domain protein 1	79.7	87	69.7	61.3	82.2	62.1	50.7	49.7	51.3
CAFS_HM_T_00051111	0.64179	0.005475	Dihydropyrimidinase-related protein 3	5439.7	5443.8	5461.1	4844.1	5272.2	4194.6	3350.8	3788.6	3350.4
CAFS_HM_T_00083277	0.642306	0.001292	Pre-B-cell leukemia transcription factor-interacting protein 1	65.5	68	60.8	57	75.5	53.7	43.8	43.3	37.7
CAFS_HM_T_00058095	0.642789	0.00015	Basement membrane-specific heparan sulfate proteoglycan core protein	12692.5	13191.8	12152.6	10590.5	11198.4	9041.6	8206.5	8322.1	7921.1
CAFS_HM_T_00057884	0.642995	6.82e-05	Mimecan	1094	1105.6	1119.4	881.6	973.6	741.4	735.3	731.1	667.7
CAFS_HM_T_00043988	0.643394	0.001103	--	557.8	609.5	562.9	406.8	391	371.6	391	387.4	334.8
CAFS_HM_T_00004099	0.643514	0.003262	Dihydropyrimidinase-related protein 2	2769.4	2930.7	2740.9	2624.2	2626.5	2150.9	1815.4	1816	1800.5
CAFS_HM_T_00016607	0.643803	0.000116	Serum deprivation-response protein	1755.4	1823.9	1852.8	1757.6	1744	1512.9	1146.7	1228.1	1122.4
CAFS_HM_T_00011371	0.646387	0.001363	C-factor	1667.3	1803.9	1583.2	1317.5	1477.6	1137.4	1100.6	1017	1149.5
CAFS_HM_T_00000778	0.646405	0.000343	Protein NLRC3	566.3	575.9	521	422.6	445.2	377.9	355.6	365.1	354.4
CAFS_HM_T_00075269	0.646625	3.56e-05	Myosin-VIIa	1814.2	1835.1	1734.5	1382.8	1723.2	1281.3	1174.1	1151.4	1155.8
CAFS_HM_T_00071290	0.647758	0.000139	Fascin	594.4	640.5	616.1	516	448.3	446.3	393.7	391.1	414.2
CAFS_HM_T_00000074	0.648834	0.000277	Cytoglobin-1	1539.8	1547.5	1471.8	1274.2	1325.7	1132.8	955.5	1060.5	942.1
CAFS_HM_T_00061581	0.648978	0.000148	Oncoprotein-induced transcript 3 protein	490	494.1	474.5	418.1	403.9	384.1	294.5	327.6	324.5
CAFS_HM_T_00053536	0.650383	0.00012	Acidic mammalian chitinase	588.5	586.2	626.7	426.8	383.5	407.5	382.9	400.7	388
CAFS_HM_T_00074324	0.652253	0.000224	6-phosphofructokinase type C	544.7	544.6	501.8	403.1	448.6	382.9	350.3	347	340.5
CAFS_HM_T_00082317	0.652318	0.012393	Neurobeachin-like protein 2	18.2	20.3	21.9	17.8	21.6	16.9	13.2	11	15.2
CAFS_HM_T_00030286	0.653915	0.000192	Triosephosphate isomerase A	768.6	825.3	761.3	651.4	737.6	583.2	519.3	515.2	505.6
CAFS_HM_T_00092107	0.655567	0.000145	Ribosomal protein S6 kinase 2 alpha	826.7	803.8	765.9	650.9	792.8	589	508	528.9	534.1
CAFS_HM_T_00065858	0.655628	0.047107	Ependymin	789.3	810.5	1006.1	701.6	572	629.3	587.8	559.2	561.5
CAFS_HM_T_00085065	0.657174	2.34e-05	Protein S100-B	1335.3	1390.8	1354.4	1281.3	1262	1066.7	876.6	919.2	885.8
CAFS_HM_T_00064193	0.657579	0.001651	RNA-binding protein with multiple splicing 2	314.1	341.6	294.3	275.4	291.9	225.6	214.1	199.9	210.7
CAFS_HM_T_00084818	0.659423	2.28e-05	--	661.7	662.8	654.2	531.5	492.1	497.6	422.7	453.8	428.3
CAFS_HM_T_00025760	0.659939	6.65e-05	--	363.8	380.4	365.6	323.4	292.1	266.9	240	254.2	238.2
CAFS_HM_T_00092419	0.66168	0.000225	Cysteine-rich protein 2	363.9	377	382	329.7	341.2	311.7	234.9	263.6	244.5
CAFS_HM_T_00008502	0.661737	0.002262	YjeF N-terminal domain-containing protein 3	283	307.5	261.5	246.1	270.2	221.7	189.2	193.9	180.7
CAFS_HM_T_00052904	0.662595	0.000146	Bifunctional protein NCOAT	5381.8	5617.5	5179.2	3673.6	3960.1	3547.3	3555.2	3543.3	3621.3
CAFS_HM_T_00005300	0.663107	0.002468	Protein shisa-4	420.6	487.2	431.2	358.7	326.9	327.9	279.9	303.3	304.7
CAFS_HM_T_00024184	0.66591	9.38e-05	Protein phosphatase 1 regulatory subunit 12A	148.7	149.7	142.2	115.5	170.5	118.9	96.4	101.8	95.2
CAFS_HM_T_00060271	0.667342	0.000354	Amyloid beta A4 precursor protein-binding family B member 1-interacting protein	274.1	270.2	295.3	232.4	301.9	248.4	185.2	192.1	183
CAFS_HM_T_00090784	0.667904	9.35e-06	14-3-3 protein zeta/delta	4149.1	4089.9	3993.6	3209.7	3630.3	2975.2	2692.1	2737.8	2740.3
CAFS_HM_T_00045575	0.668526	0.00432	Receptor-interacting serine/threonine-protein kinase 3	44.9	41.9	38.7	45.9	34	34.1	25.1	28.3	30.5
CAFS_HM_T_00072359	0.66875	0.013809	CUB domain-containing protein 1	41.9	48.7	37.4	28.8	36	33.6	27.4	28.2	30
CAFS_HM_T_00081640	0.669276	0.002323	Homeobox protein Hox-D13a	230.3	241.1	205.6	177.1	208.3	152	145.9	152.7	154.5
CAFS_HM_T_00026796	0.670551	0.036001	Poly [ADP-ribose] polymerase 12	323.8	224.7	283.8	235	222.1	199.2	180.8	179.1	198.2
CAFS_HM_T_00079799	0.67109	7.84e-05	Immunoglobulin superfamily member 3	500.5	500	529.1	419.6	427	411	337.2	348.2	341.1
CAFS_HM_T_00055319	0.676008	3.69e-05	Acidic mammalian chitinase	1629.6	1603.4	1602.3	1303.7	1232	1136.9	1044.6	1129.1	1095
CAFS_HM_T_00035411	0.676618	0.003648	Cadherin-related family member 2	311.7	329.6	296.6	318.8	374.4	247.7	206.8	190.8	237
CAFS_HM_T_00009332	0.676792	0.000118	Beta-galactosidase-1-like protein 2	2801.7	2794.8	2624.2	2064.6	3382.1	2140.8	1833.8	1852.9	1877
CAFS_HM_T_00051893	0.677505	0.025088	Sialidase-3	207	228.8	243.9	190.1	149	161.5	121.5	183.7	155.3
CAFS_HM_T_00017636	0.679979	0.000262	Glutathione peroxidase 1	1363.1	1335.4	1265.3	980.7	1046.1	969.8	882.7	936.2	876.4
CAFS_HM_T_00085068	0.680695	1.47e-06	Protein S100-A1	1572.1	1561.9	1594.4	1465.7	1372.9	1230.2	1078.1	1079.2	1061.3
CAFS_HM_T_00056934	0.681184	0.000266	Cysteine and glycine-rich protein 1	2754	2581.8	2744.1	2600.2	2548.4	2206.1	1798.5	1921.6	1783.8
CAFS_HM_T_00063020	0.68174	0.005287	--	77	84.8	70.4	70.9	59.7	66	50.8	51.5	56
CAFS_HM_T_00064041	0.682108	0.003008	Olfactomedin-4	916.1	970.5	889.5	759	738.8	709.5	603.4	708.3	581.9
CAFS_HM_T_00021205	0.682826	0.000169	--	574.5	620.3	603.9	694.7	539.2	533.8	411.8	414.8	401.6
CAFS_HM_T_00021076	0.684395	2.79e-05	Hexokinase-1	3379.5	3366.2	3258.9	2794.4	2988.6	2482.9	2251.8	2343.9	2251.4
CAFS_HM_T_00027551	0.684422	0.000152	--	701.1	720.3	747	577.6	668.4	563.4	479	493.4	511.7
CAFS_HM_T_00056822	0.686388	0.000204	CD63 antigen	2591	2555.3	2730.3	2479.3	2582.1	2340.5	1749.4	1866.7	1790.3
CAFS_HM_T_00040298	0.688998	0.000779	Wiskott-Aldrich syndrome protein homolog	52.3	56.2	54.2	47.5	47.6	42.1	39.5	34.6	38
CAFS_HM_T_00026540	0.689019	2.61e-05	--	2211.2	2178.9	2275.9	1969.2	2104.3	1794.2	1557.7	1523.3	1512
CAFS_HM_T_00015421	0.6893	0.005237	Ferritin, middle subunit	11654.2	9643.5	10550.7	6462.4	7819.5	7486.8	7397.2	7054.2	7501.7
CAFS_HM_T_00024448	0.689301	0.003196	Lamina-associated polypeptide 2, isoform beta	73.3	68.5	62.9	52.2	63.2	54.9	45.6	45.5	50
CAFS_HM_T_00058061	0.689655	0.005574	Round spermatid basic protein 1	30.5	26.2	27.4	28.8	27.1	28.4	21.2	18	18.8
CAFS_HM_T_00017527	0.691052	5.8e-05	Alpha-enolase	613.1	637.8	610.9	567.2	587.6	564.9	432.9	437.4	416.3
CAFS_HM_T_00029106	0.69288	0.001317	14-3-3 protein zeta	2819.5	2743.9	2706	2309.5	2405.1	2156.8	1917.3	1910.4	1902
CAFS_HM_T_00051455	0.693072	0.000237	Fructose-bisphosphate aldolase C	650.7	662.5	619.5	547.9	573	485.2	429.8	461.9	447.8
CAFS_HM_T_00076980	0.694038	0.000101	PDZ domain-containing protein GIPC1	618.9	644.5	603.5	492	553.5	482.5	428.2	437.5	430
CAFS_HM_T_00003791	0.694457	0.000104	Tyrosine-protein kinase SYK	523.5	528.7	497.5	469.4	483.5	419.1	358.1	365	353.1
CAFS_HM_T_00076280	0.694554	0.000181	Protein 4.1	1114.1	1185.1	1105	984.9	1242.4	888	797.3	789.1	778
CAFS_HM_T_00038844	0.69457	0.000493	Matrix metalloproteinase-9	5334.7	5405.2	5591.5	4184.9	3619.7	3617.8	3650.5	4063.5	3629.3
CAFS_HM_T_00064858	0.696858	4.84e-05	FCH domain only protein 2	1496.6	1472.9	1419.2	1203.5	1597.4	1071.5	1018.2	1009.2	1030.9
CAFS_HM_T_00015138	0.697402	0.000827	Formin-like protein 1	125.9	113.9	118.1	103.6	102.9	98.2	82	80.7	86.9
CAFS_HM_T_00059298	0.697417	1.57e-06	Ras suppressor protein 1	3781.8	3797	3727.2	3076.3	3656.7	2903.2	2649.7	2635.3	2600
CAFS_HM_T_00046226	0.697552	0.00061	Histone H1	220.2	238.9	227.3	147.5	141.2	140.5	153	157.6	168.2
CAFS_HM_T_00053276	0.698001	0.00046	LIM and senescent cell antigen-like-containing domain protein 1	1626.6	1683.1	1527.4	1314.2	1571.9	1248.4	1108.9	1133.9	1133.5
CAFS_HM_T_00059400	0.698506	2.39e-05	Cytochrome c oxidase subunit 4 isoform 2, mitochondrial	2145	2077.4	2076.9	1728.2	1925.8	1849.4	1497.3	1438	1464.8
CAFS_HM_T_00006578	0.69888	0.000605	Kinesin light chain 4	350.5	371.5	340.7	288.6	315.9	267.4	244.5	239.1	259.1
CAFS_HM_T_00000966	0.698902	8.33e-05	Sucrase-isomaltase, intestinal	769.5	810	788.5	1171.3	757.1	761.1	539.5	546.9	568.6
CAFS_HM_T_00024660	0.699835	0.000161	Poly(U)-specific endoribonuclease-C	1538.1	1455.2	1558.2	1451.3	1418.5	1182.8	1072.3	1041.9	1071.1
CAFS_HM_T_00055270	0.700856	0.003635	Aminopeptidase B	3512.7	3836.5	3269.1	2614.3	2917.3	2341.4	2431.4	2590.6	2419.9
CAFS_HM_T_00085383	0.701441	0.000436	Protein ETHE1, mitochondrial	2499.8	2423	2282.8	1774.8	2275.6	1911	1648.2	1682.5	1723.6
CAFS_HM_T_00007510	0.70237	7.58e-05	CD166 antigen homolog A	321.8	308.7	327.4	315	276.3	251.3	225.6	225.6	221.6
CAFS_HM_T_00023085	0.702388	0.000417	Adenylosuccinate synthetase isozyme 2	1135.4	1133.1	1061	937.5	1066.5	851.9	791.5	803.7	743.4
CAFS_HM_T_00024547	0.702607	6.39e-05	Aldose reductase	3065	3088.8	2950.3	2539.6	2708.2	2291.2	2145.2	2175.2	2076.2
CAFS_HM_T_00028559	0.702912	0.000705	Flotillin-1	298.9	316.3	287.9	264.5	292.5	254.8	220.4	209.8	204.6
CAFS_HM_T_00078503	0.703534	0.000264	Integrin beta-2	1837.3	1958.2	1949.5	1448.5	1552.3	1446.5	1310	1334.8	1397
CAFS_HM_T_00057166	0.703551	0.00312	Extracellular peptidase inhibitor (Fragment)	646.8	693.9	675.5	527	532.3	538.7	441.9	529	447.6
CAFS_HM_T_00043005	0.703582	0.000206	Vinculin	11654.7	11934.7	11242.8	10347.2	11317.1	9366.6	8159.2	8476.2	7871.9
CAFS_HM_T_00044688	0.703838	0.031552	Lymphocyte-specific protein 1	40.4	43.9	53.8	34.3	38.1	28.6	34.2	30	33
CAFS_HM_T_00061958	0.704034	4.84e-05	L-lactate dehydrogenase A chain	2330.5	2312.4	2249.1	1922.8	2120	1799.6	1670.5	1584.8	1596.9
CAFS_HM_T_00045272	0.704246	2.14e-05	Plasminogen activator inhibitor 1	1768.6	1726	1794.6	1580.2	1396.6	1505.3	1262.4	1236.4	1226.1
CAFS_HM_T_00024185	0.70434	0.000384	Protein phosphatase 1 regulatory subunit 12A	844.1	889	817.8	718.5	898.5	710.4	592.6	617.3	586.8
CAFS_HM_T_00034508	0.704448	0.000109	Cytosolic 5&apos;-nucleotidase 1A	916.9	910.7	863.3	736.4	758.1	711.7	636.4	635.6	623.6
CAFS_HM_T_00082878	0.705027	2.87e-05	Tyrosine-protein phosphatase non-receptor type 6	3006.1	3110.6	3000.4	2654.1	2895.3	2367.1	2139.5	2182.3	2106
CAFS_HM_T_00086755	0.705223	0.000263	Myosin-Ic	6493.3	6669.2	6165.3	5584.5	6282.9	5129.9	4482.2	4645	4503.2
CAFS_HM_T_00076236	0.705294	0.015844	Macrophage mannose receptor 1-like protein 1	295.4	327	337.2	239.3	230.6	219.8	226.7	222.1	228
CAFS_HM_T_00008641	0.70538	3.71e-05	Lipoprotein lipase	3173.1	3117.4	3048.3	2545.9	2250.7	2311.4	2212.7	2140.4	2234.3
CAFS_HM_T_00023764	0.70682	0.00159	Complement C1q-like protein 2	96.3	104.1	94.3	119.1	123.4	140.7	69.3	73.5	65.5
CAFS_HM_T_00078356	0.707117	0.000263	6-phosphofructokinase, liver type	1853.8	1933	1787.1	1537.5	1706.4	1491.5	1289.7	1341.4	1310.3
CAFS_HM_T_00060587	0.707122	0.000132	Ig kappa chain V-IV region (Fragment)	605.3	617.6	589.8	562.6	519.3	515.4	442.6	428.4	410.8
CAFS_HM_T_00016687	0.708252	0.001928	Peptidyl-prolyl cis-trans isomerase FKBP11	1113.4	1087.8	1219.9	1312.7	936.7	1011.6	793	779.5	850.5
CAFS_HM_T_00068065	0.708888	4.71e-06	Moesin	7679.2	7716.8	7513.4	6749.2	6902.4	6117.3	5444.2	5425.4	5370.6
CAFS_HM_T_00005179	0.709126	0.004366	Calpain-2 catalytic subunit	152	148.2	167.7	144.9	147.7	127.7	103.7	120.4	107.7
CAFS_HM_T_00023972	0.70957	0.013358	Protein NLRC3	176	186.1	149.9	150.9	136.4	236.6	112.5	122.7	128.1
CAFS_HM_T_00049825	0.709913	1.41e-05	Glucosamine--fructose-6-phosphate aminotransferase [isomerizing] 2	3735.8	3822.6	3678.9	3035.3	3743.7	2899.7	2674.6	2644.8	2658.1
CAFS_HM_T_00003779	0.711272	5.18e-05	Interleukin-6 receptor subunit beta	303.2	295	288.1	225.4	277	238.1	211.2	212.2	207
CAFS_HM_T_00074129	0.71166	9.64e-05	Tropomyosin alpha-4 chain	2303.7	2389.9	2351.9	2189.2	2122.7	1964	1658.9	1737.6	1617.5
CAFS_HM_T_00016432	0.711663	0.000609	Glycerol-3-phosphate dehydrogenase, mitochondrial	3061.1	3093.4	2838.1	2577.5	2785.6	2390.5	2094.8	2206.6	2098.3
CAFS_HM_T_00069043	0.712141	0.001292	Ribosomal protein S6 kinase alpha-4	872.2	828.6	783.4	675.3	844.8	671.1	619.3	575.4	574.4
CAFS_HM_T_00033394	0.712322	2.74e-05	EMILIN-1	2528.9	2581.9	2541.5	2377	2569.3	2138.7	1826.5	1863.6	1760.8
CAFS_HM_T_00052731	0.713767	0.000294	Acyl-coenzyme A thioesterase 8	518.8	547.7	557.7	372.2	385.7	383.6	374.4	392.6	392.3
CAFS_HM_T_00018690	0.714358	3.53e-06	Protein-glutamine gamma-glutamyltransferase 2	9248.7	9196.8	9120.5	7929.1	8440.3	6953.8	6657.7	6588.9	6445.4
CAFS_HM_T_00085560	0.715429	0.001412	Pre-B-cell leukemia transcription factor 2	226.6	210.1	225.7	181.9	199.6	166.9	148.7	169	156.2
CAFS_HM_T_00027614	0.716514	0.000152	Fatty acid-binding protein, heart	2704.1	2647.7	2821.8	3304.9	2605.1	2929.6	1911.1	1975.8	1969.6
CAFS_HM_T_00077575	0.716919	1.36e-06	Calponin-2	899.6	906.7	906	879.6	869.5	770	639.3	657	648.2
CAFS_HM_T_00022906	0.717225	0.003926	Calcium/calmodulin-dependent protein kinase type II subunit gamma	215	217.2	194.8	169.5	209.4	161.9	144.4	163.5	141.8
CAFS_HM_T_00078089	0.71782	0.000725	Large neutral amino acids transporter small subunit 2	152.4	154.8	149.6	142.6	197.7	129.8	117.3	102.4	108.2
CAFS_HM_T_00051668	0.717957	1.06e-05	Complement factor B	647.5	660.6	661.1	524.8	492	476.5	470.1	480.6	463.1
CAFS_HM_T_00050943	0.718118	0.000103	Vitelline membrane outer layer protein 1	930.3	965.1	978.5	641.8	677.1	622.3	705.3	687.9	670.6
CAFS_HM_T_00086286	0.718752	0.000323	High mobility group-T protein	603.6	605.3	566.4	474.2	535.4	457.1	424.6	437.6	413.8
CAFS_HM_T_00001947	0.718774	0.001747	Ig kappa chain C region	729	681.6	655	667.7	676	642.3	499.3	517.5	467.9
CAFS_HM_T_00065779	0.718922	5.73e-06	Non-specific cytotoxic cell receptor protein 1 homolog	2831.9	2838.8	2809.5	2329.8	2417.7	2134	1985.7	2055.8	2055.1
CAFS_HM_T_00047193	0.719107	0.000126	Intelectin-1	376.6	394.5	375.6	310.9	291.6	291	274.2	282.1	268.3
CAFS_HM_T_00075145	0.72007	0.000419	Glutamine synthetase	683.9	709	654.4	557.4	523.7	517.6	504.7	492.6	476.9
CAFS_HM_T_00012634	0.720237	0.000553	Intercellular adhesion molecule 1	491.1	461.9	482.5	422.6	405.1	385.8	330.3	364.2	339.4
CAFS_HM_T_00011271	0.720417	0.000417	Cathepsin H	1341.8	1422.9	1426.9	1216.2	1326.7	1269.6	999.1	1050	970.6
CAFS_HM_T_00000608	0.720601	1.23e-05	Ig lambda chain C region	586.7	582.2	588.8	475.9	455.9	435.8	424.6	431	411
CAFS_HM_T_00087019	0.720799	0.000224	Glutamate carboxypeptidase 2	953	951.7	992.5	918.1	792.6	775.8	685.3	728.6	674.4
CAFS_HM_T_00063878	0.721245	0.001106	Alpha-parvin	834.3	833.8	760.2	726.9	812.4	644.4	563.1	599.8	588.5
CAFS_HM_T_00064486	0.722374	0.000644	Ubiquitin carboxyl-terminal hydrolase 47	49.1	49.5	48	37.8	34	36.5	36.1	37.1	32.7
CAFS_HM_T_00046726	0.722566	0.006425	AMP deaminase 3	166.2	179.7	154.4	174.1	186.1	151.6	126.1	124.9	110.5
CAFS_HM_T_00058041	0.722989	0.000157	Rab GDP dissociation inhibitor alpha	1137.1	1167.5	1094.9	1055	1054.5	970.2	802.9	830.1	824.8
CAFS_HM_T_00082002	0.723344	0.000139	Plectin (Fragment)	29978.8	30577.5	28719.2	25326	27914.4	22922.3	21430.3	21871.4	21275.2
CAFS_HM_T_00035257	0.723371	0.000333	Transmembrane emp24 domain-containing protein 11	230.2	243.5	237	267.1	238.5	216.7	163.8	178.5	171.8
CAFS_HM_T_00003972	0.72348	4.33e-05	Annexin A3	4594.2	4554.8	4408.8	4110.2	4280.1	3760.3	3316.7	3284.8	3207.3
CAFS_HM_T_00036622	0.72445	0.004352	Dedicator of cytokinesis protein 2	198.7	171.7	193.2	147.4	165.8	164.9	131.6	134	142.7
CAFS_HM_T_00083577	0.72499	0.000458	Leukocyte elastase inhibitor	596.3	574.1	625.9	459.2	462.7	427.4	427.3	442.2	432.8
CAFS_HM_T_00013689	0.725434	0.038726	Amine sulfotransferase	1763.9	1767.9	1768.2	2072.2	1804.1	2366.7	1328.1	1423.9	1092.8
CAFS_HM_T_00001714	0.725697	0.002709	von Willebrand factor A domain-containing protein 5A	178.9	162.2	160.9	132.8	142.8	135.7	125.4	125.1	113.8
CAFS_HM_T_00040130	0.725757	3.28e-05	Voltage-dependent anion-selective channel protein 2	5113.8	4908.8	5010.4	4731.3	4609.9	4567.8	3671	3663.9	3575.4
CAFS_HM_T_00027073	0.725757	0.0004	Solute carrier family 41 member 2	445.1	453.6	432.6	458.6	386.2	388.6	309.5	340.3	316.4
CAFS_HM_T_00087621	0.726056	0.001017	Hephaestin-like protein 1	142.6	142.1	148.6	154.7	132	122.6	101.9	113	99.7
CAFS_HM_T_00089300	0.726098	0.000226	Olfactomedin-4	261.7	276	275	225.7	222.4	206.1	202.9	190.3	196.9
CAFS_HM_T_00028970	0.726505	1.65e-05	N(G),N(G)-dimethylarginine dimethylaminohydrolase 2	995.8	982.8	971	898.3	1031.2	852.1	699.9	728.7	714.3
CAFS_HM_T_00078382	0.727273	0.001733	Death-associated protein-like 1-B	308.2	300.9	312.7	222.1	226.2	205.1	204.2	241.2	225
CAFS_HM_T_00019014	0.727492	4.01e-05	Dermatopontin	824.8	809.2	812.9	710.7	819.7	659.7	595.5	610.1	574.5
CAFS_HM_T_00056507	0.72778	0.000161	Agrin	2686.1	2815.9	2702.4	2374.3	2283.2	2190.6	1959.4	2061	1950.6
CAFS_HM_T_00090494	0.731429	0.000129	Spectrin beta chain, brain 4	687.2	713.9	698.9	582	611.8	553.8	529.1	513.5	493.4
CAFS_HM_T_00064296	0.731728	0.000622	Protein phosphatase 1 regulatory subunit 12C	1793.4	1838.6	1680.9	1563.5	1924.1	1414.3	1303.9	1314.1	1269.6
CAFS_HM_T_00064429	0.732021	0.000136	Fibulin-1	1666.7	1742.4	1766.3	1541.5	1477.3	1333	1240.3	1277.5	1270.7
CAFS_HM_T_00071005	0.732794	0.002374	Neuronal membrane glycoprotein M6-b	245.5	241.8	217.4	204.7	233.8	185.5	177.1	169.9	169.4
CAFS_HM_T_00037464	0.733051	2.35e-05	Neuroblast differentiation-associated protein AHNAK	16529.2	16851.2	16745.6	15975.3	15768.5	14026.1	12210.1	12568.7	11966.1
CAFS_HM_T_00075236	0.733271	3.7e-05	Actin-related protein 2/3 complex subunit 5	644.7	632	640.6	525.9	595.1	523.6	481.4	454.9	469.6
CAFS_HM_T_00085198	0.733288	6.52e-05	--	617.8	648.8	643.7	591.5	497.6	477.5	463.1	469.9	467.8
CAFS_HM_T_00024566	0.733805	0.006252	Twinfilin-1	2784.5	2780.8	2605.4	2292.4	2825.9	2256.2	2001	2006.2	1988.5
CAFS_HM_T_00017175	0.734282	0.0001	Lipoma-preferred partner homolog	1180.8	1183.4	1165.1	1008.1	1217.4	987.6	838.1	901.6	851.8
CAFS_HM_T_00084655	0.734926	0.00102	Four and a half LIM domains protein 3	356	390.1	380	368.4	372.6	347.3	270.3	287.3	270
CAFS_HM_T_00058714	0.735022	0.003036	PRA1 family protein 3	484.8	461	471.3	465.9	461.6	404.1	340	381.8	319.8
CAFS_HM_T_00078623	0.735064	0.00059	Collagen alpha-2(V) chain	339.5	331.2	311.8	289.7	326.4	259.7	241.4	245.8	235
CAFS_HM_T_00005311	0.735375	0.001171	Mimecan	669.7	643.9	638.6	548.7	743.4	568.6	504.4	488.5	442.7
CAFS_HM_T_00058522	0.735538	0.001498	Neural cell adhesion molecule L1.1 (Fragment)	556.7	559.9	510.1	463.9	475.6	419	384.9	416.1	395.5
CAFS_HM_T_00008082	0.736012	0.000984	--	143	157.1	150.3	121.3	126.1	115.7	108.7	114.7	108.1
CAFS_HM_T_00081120	0.737747	0.004145	NADP-dependent malic enzyme, mitochondrial	465.6	407.9	418	399.8	599.6	374.4	316.3	306	330.5
CAFS_HM_T_00063768	0.73803	0.001528	Lactadherin	456.1	473.3	426.1	404	359.7	339.8	346.3	330.8	323.3
CAFS_HM_T_00081679	0.738745	0.000556	Cytochrome b reductase 1	137.9	145.5	134.2	119.4	126.8	122.6	101.1	101.7	105.7
CAFS_HM_T_00080766	0.739124	0.000613	NAD(P)H dehydrogenase [quinone] 1	436.6	422.4	400.6	363.4	402.6	341.3	318.2	307.5	305.3
CAFS_HM_T_00003676	0.739486	0.002997	Lamin-B1	3712	3653.7	3519.7	3027.9	3551.3	2945.2	2684.6	2697.9	2667.1
CAFS_HM_T_00009168	0.740592	0.000362	--	131.3	135.5	131.8	105.3	109.6	111.7	102.7	99.3	93.2
CAFS_HM_T_00060935	0.740596	0.000106	SH3 domain-containing kinase-binding protein 1	1732.4	1814.6	1743.2	1603.2	1570	1469.7	1288.9	1336	1293
CAFS_HM_T_00019361	0.740885	0.005935	Integrin beta-7	23.5	26.9	26.4	19	22.8	19.4	18.7	18	20.2
CAFS_HM_T_00070677	0.741803	0.000235	CD97 antigen	151.3	158.9	153.4	146	138.7	129.1	113.7	111.3	118.9
CAFS_HM_T_00047699	0.741807	0.001105	Glycogen phosphorylase, muscle form	328.9	353.4	324.7	284.7	331.4	279.9	252.7	238.8	255.5
CAFS_HM_T_00056078	0.741915	0.001625	von Willebrand factor A domain-containing protein 1	519	544.5	485.6	431.8	448.1	409.2	386.4	388.3	374.6
CAFS_HM_T_00017743	0.742006	0.001004	Protein-arginine deiminase type-2	859	848	866.7	681.3	670	713.3	591.3	678.2	640.2
CAFS_HM_T_00060369	0.742513	9.92e-05	6-phosphofructokinase type C	234.6	227	236.3	185.6	211	183.7	175.6	167.6	175
CAFS_HM_T_00000711	0.743044	0.00215	Coronin-7	804.5	839.5	896.9	703.4	774.3	702.5	611.6	616.8	659.6
CAFS_HM_T_00056008	0.744337	0.004358	Disks large-associated protein 4	226.6	223.8	198.5	201.5	219.9	176.4	158.2	157.3	167.5
CAFS_HM_T_00027003	0.744467	0.000494	CD9 antigen	786.6	802.8	796.2	588.5	687.9	586	554.1	607	614.9
CAFS_HM_T_00001018	0.74574	8.23e-05	--	604.9	606.4	619.5	489.8	481	453.2	441.1	454.4	469.8
CAFS_HM_T_00037119	0.745765	0.0038	Protein diaphanous homolog 2	217.8	223.4	214.1	193.6	231.9	197.6	145.4	173.2	170.1
CAFS_HM_T_00082206	0.745857	0.003662	Zyxin	1344.8	1528.9	1368.4	1322.8	1410	1178.8	1057.7	1072.7	1033.6
CAFS_HM_T_00010957	0.746327	1.14e-05	Signal peptide peptidase-like 2A	876.4	879.2	892.3	838.4	734.2	770.1	652.3	651.7	672.2
CAFS_HM_T_00028574	0.746499	0.013022	Patr class I histocompatibility antigen, A-2 alpha chain	70.2	75.2	68.8	49.8	57.6	61.6	60.7	48.3	50.9
CAFS_HM_T_00071798	0.746813	9.2e-05	Arfaptin-1	1074.9	1052.2	1018.4	887.9	964.8	873.9	788.4	783.3	777.4
CAFS_HM_T_00043779	0.74726	0.000416	Macrophage-capping protein	901.7	899.3	936.2	926.6	828.7	776.1	649.8	684.7	710.9
CAFS_HM_T_00088378	0.748125	5.69e-05	Cell surface glycoprotein MUC18	1376.8	1358	1344.2	1173.8	1276.8	1053.4	999.9	1050.4	1001.3
CAFS_HM_T_00030573	0.748348	0.002102	Rho guanine nucleotide exchange factor 2	59	61	61.6	53.6	50.3	52.2	42.3	44.5	49.1
CAFS_HM_T_00019221	0.748659	2.09e-05	UDP-N-acetylhexosamine pyrophosphorylase	2786.4	2734	2699.5	2548	3055.8	2253.2	2073.1	2020.3	2060.5
CAFS_HM_T_00012594	0.749356	0.000219	KN motif and ankyrin repeat domain-containing protein 2	2471.7	2530.9	2372	2166.1	2423.7	2018.8	1847.7	1862.8	1815.7
CAFS_HM_T_00048160	0.749443	6.1e-06	Ras GTPase-activating-like protein IQGAP1	6470.1	6476.9	6399.1	5770.2	6091.4	5474.6	4830.3	4912.1	4756.4
CAFS_HM_T_00038221	0.749447	0.046334	Sodium- and chloride-dependent creatine transporter 1	54.2	61.1	65.5	56	54.2	54.1	37.1	50.9	47.5
CAFS_HM_T_00078933	0.749583	0.002059	Integral membrane protein 2B	179.9	171.5	187.7	147.8	132.7	118.5	136.5	141	126.6
CAFS_HM_T_00057603	0.749689	0.001663	G-protein coupled receptor 182	103.8	112.2	105.6	93.8	94.4	90.2	79.6	85	76.5
CAFS_HM_T_00069923	0.749819	0.000279	Complement C3 (Fragment)	267.6	274	286.2	214	205.9	211.2	210.5	204.2	206
CAFS_HM_T_00035137	0.750317	0.000884	Long-chain-fatty-acid--CoA ligase 1	2662.7	2700.8	2527.3	2525.3	3341.9	2688.3	2030.7	2019.8	1870.1
CAFS_HM_T_00063456	0.7504	0.000126	Talin-2	2211.2	2227.8	2119.1	1938.9	2161.8	1844.2	1612.3	1665.9	1643
CAFS_HM_T_00005955	0.752556	8.48e-05	Microfibrillar-associated protein 2	419.1	418.9	414	373.6	384.8	338.4	303.5	324.8	313.9
CAFS_HM_T_00056370	0.752969	0.000495	Sarcolemmal membrane-associated protein	2430	2432.5	2320.8	2133.9	2309.2	2134.9	1833.7	1858.6	1716.5
CAFS_HM_T_00089247	0.753628	0.001671	Nuclear factor 7, ovary	415.5	448.7	403.8	353.7	347.8	307.4	312	321.4	322.2
CAFS_HM_T_00055269	0.754317	0.000268	NADH-cytochrome b5 reductase 1	1048.8	1020.9	988.3	884.1	1019.5	841.6	790.9	760.5	755.3
CAFS_HM_T_00055381	0.754407	0.009643	Keratocan	800.2	800.9	792.7	730.8	864	674.2	596.1	639.7	570.1
CAFS_HM_T_00044365	0.75453	0.025054	Integrin alpha-D	383.4	354.8	332.4	332.5	320.4	306.9	267.5	273.7	266.6
CAFS_HM_T_00038712	0.754673	0.025453	Zinc finger protein 131	45.7	45.6	37.1	41.9	44	33.9	34.3	31.2	31.4
CAFS_HM_T_00089710	0.754827	0.000863	Nidogen-2	325.3	334.4	334.7	293	305.8	264	233.7	262.3	254.6
CAFS_HM_T_00053089	0.754883	0.00925	Nuclear ubiquitous casein and cyclin-dependent kinases substrate	258.6	236.9	241.7	203.4	229.8	164.8	207.4	175.7	173.4
CAFS_HM_T_00074299	0.755167	0.014016	Supervillin	111.3	122.3	109.9	93.3	137.2	92	91	92.8	75.6
CAFS_HM_T_00004455	0.755311	9.93e-05	EH domain-containing protein 1	1848.9	1868.6	1785.4	1601.8	1756.4	1560.1	1396.2	1402.8	1357.4
CAFS_HM_T_00001516	0.755313	0.003699	Guanylate-binding protein 3	844.2	795.5	802.2	676.3	587.7	608.4	670.6	600.6	573.2
CAFS_HM_T_00082332	0.755576	0.000195	Uridine phosphorylase 1	1658.4	1627	1561.1	1421.7	1391.3	1294.1	1215	1208.3	1238.6
CAFS_HM_T_00090991	0.75569	0.002107	NACHT, LRR and PYD domains-containing protein 3	324.7	363.2	340.3	287.5	303.2	284	253.5	266.5	257
CAFS_HM_T_00002441	0.756203	0.000571	--	479.9	480.3	446.3	469.5	478.3	473.8	355.4	350.4	357.8
CAFS_HM_T_00075245	0.756556	7.88e-05	Protein Niban	701	681.8	668.6	620.9	682.7	595.9	514.7	524.5	512.8
CAFS_HM_T_00064966	0.756667	0.013747	Disabled homolog 2	1268.7	1275	1265.9	1046.5	1003.7	1043.4	886.7	996.1	999.8
CAFS_HM_T_00027144	0.757146	0.000839	Caldesmon	2852.8	2870.5	2743.1	3347.2	3336.3	2659.1	2171.6	2227.4	2011.3
CAFS_HM_T_00027861	0.757942	0.000991	Tubulointerstitial nephritis antigen-like	289.7	313.4	290.9	263.1	301.6	235.3	219.4	229.1	229.1
CAFS_HM_T_00080831	0.758596	0.007409	Rho GTPase-activating protein 15	335.4	338.2	315.2	275.3	308.2	279.6	250.6	248.2	251.3
CAFS_HM_T_00081260	0.759378	0.001546	Integrin alpha-V	606.3	661.2	622.6	639.1	584.8	552.4	472.3	500.1	462.9
CAFS_HM_T_00051403	0.759866	0.043632	Lissencephaly-1 homolog B	2457.6	2086.3	2442.2	2009.3	1922.2	1867.5	1774.7	1776.7	1757.1
CAFS_HM_T_00090949	0.759904	0.000566	Calpain-1 catalytic subunit	2111.7	2064.3	2038.6	2057.5	3448.7	2440.7	1616.8	1621.5	1484.2
CAFS_HM_T_00038866	0.760037	0.008442	Synaptophysin-like protein 1	195.9	166.1	183.5	194.1	168.6	149.4	143.1	137.3	134.2
CAFS_HM_T_00030564	0.76056	0.000704	--	1573.4	1552.3	1673	1312.7	1427.5	1328.2	1184.2	1234.2	1231.3
CAFS_HM_T_00063121	0.760657	0.000248	Histone H1	564.8	591.4	591.5	455.3	512.3	426.3	429.2	451.2	449
CAFS_HM_T_00034064	0.761159	0.001083	A-kinase anchor protein 12	1809	1811.9	1717.8	1730.3	1712.2	1655.7	1334.2	1431.4	1298
CAFS_HM_T_00072590	0.761866	0.00879	--	254.4	261.8	223.3	223.7	230.8	208.3	182.6	194.3	186.5
CAFS_HM_T_00071729	0.762326	0.000441	Replication factor C subunit 1	752.7	759.3	735.2	689.9	761	604.6	567.7	598.7	546.7
CAFS_HM_T_00017862	0.762478	1.55e-05	Extended synaptotagmin-1	7212.7	7238.3	7060.7	6693.8	7218.3	6119	5448.1	5544.6	5409.5
CAFS_HM_T_00037789	0.762972	0.026572	Leupaxin	28	31.4	25.4	25	23.1	24.5	22.7	22.2	19.8
CAFS_HM_T_00000705	0.763145	2e-05	Coronin-7	2941.2	2961	2951.3	2526.3	2713.1	2416.7	2251.2	2303.6	2201.7
CAFS_HM_T_00006824	0.763205	0.001241	Talin-1	23354.9	23486.9	22840.4	20343.3	22970.3	19432.9	17705.5	17744.8	17731.5
CAFS_HM_T_00072339	0.76376	0.000454	Integrin alpha-L	812.1	790.2	805	687.5	708.4	687.5	611.1	642.7	584.8
CAFS_HM_T_00037419	0.763779	0.003517	Thiosulfate sulfurtransferase/rhodanese-like domain-containing protein 1	410.6	388.8	374.5	307.5	378.6	302.6	308.2	310.9	277.5
CAFS_HM_T_00016010	0.764516	0.001646	Heme oxygenase	725.7	806.1	765.6	1371.1	1299.3	1046.9	584	595.8	576.6
CAFS_HM_T_00080243	0.764572	0.024687	Dipeptidyl peptidase 4	68.9	78.4	72.3	57.3	60.1	55	56.3	55.8	55.8
CAFS_HM_T_00033746	0.765096	0.000202	Laminin subunit alpha-4	1157.2	1106.1	1113.4	1041	1057.9	932	850.2	886.3	847
CAFS_HM_T_00081885	0.765395	0.019435	Carcinoembryonic antigen-related cell adhesion molecule 3	71.6	85.6	73.4	97.7	94.9	89.1	62.4	56.2	57.9
CAFS_HM_T_00008957	0.765644	4.24e-05	Lamin-B2	7035.2	7015.8	6894.5	5956.1	6499.5	5678.2	5264.5	5490	5282.3
CAFS_HM_T_00048978	0.765751	8.51e-05	Cadherin-1	597.3	612.1	625.4	570.2	595.7	538.7	472.3	471.4	461.3
CAFS_HM_T_00085948	0.766578	0.005267	Endothelin-converting enzyme 2	239.7	251.4	222.2	230.8	204.6	197.6	172.2	190.7	183.9
CAFS_HM_T_00056333	0.766832	9.41e-05	Acidic mammalian chitinase	887.2	895.2	911.8	714.3	729.6	694.5	667.1	704.1	694.8
CAFS_HM_T_00030374	0.767016	0.015338	Proteasome subunit beta type-8	598.8	695.3	585	693.4	653.5	555.9	483.8	494.7	462.8
CAFS_HM_T_00075796	0.76771	0.001305	Laminin subunit gamma-1	3383.6	3502.7	3247.6	3176.1	3253.1	2822.1	2542	2720.8	2517.1
CAFS_HM_T_00032503	0.767733	0.000444	Transthyretin	556.2	570.3	548.3	534.4	543.2	491.6	430.9	445.3	409.6
CAFS_HM_T_00053222	0.76796	0.013321	6-phosphofructo-2-kinase/fructose-2,6-biphosphatase 4	72.2	85.7	84.3	79.6	84.7	94.2	60.4	64.1	61.5
CAFS_HM_T_00077727	0.76866	0.006054	EMILIN-2	227.9	237.2	208.8	222.8	222.3	184.6	169.2	182.7	166.1
CAFS_HM_T_00071700	0.769083	2.39e-05	Ubiquitin carboxyl-terminal hydrolase isozyme L1	998.8	983.8	988.6	921.2	967.9	884.6	771	770.9	743.2
CAFS_HM_T_00023359	0.76988	0.000242	Complement factor D	800.5	780.9	823	662.4	610.6	624.1	600.9	620.3	629.9
CAFS_HM_T_00049080	0.770588	0.000297	Alpha-parvin	476	461.7	456.3	415.3	484.6	383.5	367.6	361.9	344.7
CAFS_HM_T_00082459	0.771261	4.29e-05	--	446.2	436.8	446.9	406.6	417.9	412.7	348.2	334.1	343.4
CAFS_HM_T_00010173	0.771987	0.017288	Gigaxonin	28.4	30	33.7	27.5	26.1	27.5	22.7	23	25.4
CAFS_HM_T_00080460	0.772368	0.000571	Signal transducer and activator of transcription 1	263.1	255.8	253.4	223.2	235.3	221.1	189.9	207.6	199
CAFS_HM_T_00059830	0.772528	0.000556	Lipocalin	688	652.1	689.6	651.3	662.2	647.5	511.3	541	515.7
CAFS_HM_T_00068710	0.773018	1.73e-05	Endothelial differentiation-related factor 1 homolog	921.1	944.3	921.6	785.1	785	722.9	710.1	724.1	720.2
CAFS_HM_T_00036660	0.773331	0.003995	Glucosamine-6-phosphate isomerase 2	966.5	958.4	858.9	819.8	806	742.1	731.5	713.7	707.6
CAFS_HM_T_00032173	0.773643	0.001795	Palladin	459	476.1	430	423.1	483.6	400.5	347.9	359.4	348.8
CAFS_HM_T_00018111	0.77477	0.000514	Probable ubiquitin carboxyl-terminal hydrolase FAF-X	316.8	311.6	295.1	273.4	278.2	250.5	240.7	235	239.8
CAFS_HM_T_00034123	0.775086	0.000288	Alpha-1-antitrypsin-like protein CM55-MS	497.6	520.8	517.3	484.7	536.9	419.6	390.8	409.7	389.8
CAFS_HM_T_00069924	0.775398	0.003821	Complement C3 (Fragment)	408.1	409.9	400.6	336.1	312.2	335.7	314.4	341	289.5
CAFS_HM_T_00074221	0.775404	0.000277	Protein-glutamine gamma-glutamyltransferase K	2407.1	2519.8	2420.5	2444.2	2298.1	2132.2	1856.1	1954.2	1886.9
CAFS_HM_T_00071607	0.775961	0.02317	RNA-binding protein 47	197.6	204.5	172.8	163.8	179.8	142.2	163	142	141.1
CAFS_HM_T_00025586	0.775978	0.000352	Complement C1q-like protein 4	1002.3	1055.7	1054.2	1049.1	886.7	875.3	800.3	789.1	825.6
CAFS_HM_T_00048864	0.776861	6.13e-05	Myosin regulatory light chain 2, smooth muscle minor isoform	1219.8	1229.9	1248	1097.1	1197	1099.3	933.2	978.9	960.5
CAFS_HM_T_00022603	0.776914	0.000944	Myoferlin	652.4	697.9	644	702.4	697.3	644.9	515.9	521.5	512
CAFS_HM_T_00081146	0.777202	0.000425	ADP/ATP translocase 2	877.5	864.1	823.5	829.5	842.2	702.5	677.6	653.1	662.9
CAFS_HM_T_00090021	0.77738	0.00625	--	235.8	232	259	443.4	445.6	369	199.9	181.4	183.7
CAFS_HM_T_00064077	0.777727	4.91e-05	Aminopeptidase N	3596.3	3558.3	3540.8	3043.9	2997.8	2828.6	2710.6	2845.5	2762
CAFS_HM_T_00017194	0.778151	0.000567	Sodium/potassium-transporting ATPase subunit beta-233	4312.1	4124.6	4009.6	3096.5	3560.1	3155.1	3226.8	3276.2	3182.1
CAFS_HM_T_00029521	0.778204	0.003088	Engulfment and cell motility protein 1	134.2	139.5	143.8	117.4	128.6	120.5	114.6	101	109.3
CAFS_HM_T_00085049	0.778516	0.001782	Ras-related protein Rab-13	433	457.1	433.7	449.1	440.6	389.5	323.8	360	346.8
CAFS_HM_T_00017170	0.778542	0.001846	Lipoma-preferred partner homolog	201.2	212.6	196.7	202.3	202.1	171.7	150.7	163.5	161.1
CAFS_HM_T_00008395	0.779573	0.00021	Secretory carrier-associated membrane protein 4	397.4	398.9	404.1	342.7	367.4	341.3	304.7	306.1	325
CAFS_HM_T_00090032	0.77972	0.005149	Keratinocyte-associated protein 3	282.1	285.9	261.4	207.5	289.2	237.7	218.1	200.8	227.8
CAFS_HM_T_00059104	0.780711	0.008054	Ig lambda chain C region	642.5	588	629.6	651.7	547.7	569.6	450.4	526.4	475.4
CAFS_HM_T_00053848	0.780919	0.00071	Keratin, type I cytoskeletal 16	1266.8	1280.9	1293.8	1240	1255.2	1283.8	948.6	1048.1	1003.2
CAFS_HM_T_00029710	0.781098	5.56e-05	Counting factor associated protein D	2295.6	2245.4	2295.4	2013.9	2245.1	2057.2	1743.4	1819.6	1776.9
CAFS_HM_T_00085296	0.781458	0.001179	Glyceraldehyde 3-phosphate dehydrogenase, testis-specific	5895.4	6257.9	5748.1	5966.6	5615	4945.4	4741.5	4663.2	4584.5
CAFS_HM_T_00011001	0.781571	0.000107	Fibrillin-1	10684.3	10974.2	10627.5	9959.4	10190.1	8740.1	8307.7	8631.5	8294.6
CAFS_HM_T_00035299	0.781869	0.004754	Eukaryotic translation initiation factor 4E-binding protein 3-like	304.9	339.3	330.9	297	282.3	286.4	240.5	263.6	258.3
CAFS_HM_T_00003104	0.78202	7.47e-05	Brain-specific angiogenesis inhibitor 1-associated protein 2-like protein 2	1201.6	1191.5	1195.3	935.9	1019.8	897.4	905.4	955.6	945.2
CAFS_HM_T_00053565	0.782061	0.000642	Plasma membrane calcium-transporting ATPase 4	839.6	844.3	816.8	758.9	712.4	676.5	649.9	681.9	623.9
CAFS_HM_T_00067645	0.782284	4.94e-05	Sarcoplasmic/endoplasmic reticulum calcium ATPase 3	2244.7	2272.4	2185.2	2093	2259.8	2107.7	1743.6	1757.4	1742.1
CAFS_HM_T_00067108	0.782311	0.001723	NAD-dependent malic enzyme, mitochondrial	1995.1	2016.1	1869.2	1667.5	1990.1	1583.9	1596	1525.8	1478.5
CAFS_HM_T_00084032	0.782907	0.029985	Plasma glutamate carboxypeptidase	202.8	177.3	187.4	144	156.9	146.8	146.9	149.5	147.9
CAFS_HM_T_00086469	0.782918	1.01e-05	CD166 antigen homolog A	1378.7	1402.5	1388.2	1117.9	1202.6	1119.8	1104	1085	1075.3
CAFS_HM_T_00006719	0.783293	0.011993	Antihemorragic factor cHLP-B	7057.5	7251.1	8004.5	12441.3	13367.4	13512.2	5963.9	6136.4	5377.4
CAFS_HM_T_00080034	0.783944	0.012903	UPF0124 protein C13orf31 homolog	442.1	496.4	429.2	418.6	421.8	369	340	375.8	356.4
CAFS_HM_T_00007340	0.784215	0.000402	Erythrocyte band 7 integral membrane protein	208.2	203.4	202.9	206.2	214.4	170.6	166.6	153.9	161.4
CAFS_HM_T_00037442	0.784507	0.002699	Cohesin subunit SA-2	748.4	763.9	693.8	693.7	727.6	630.4	598.2	571	561.5
CAFS_HM_T_00006993	0.784617	0.000274	Long-chain fatty acid transport protein 4	1074.1	1096	1046.5	902.1	1112.1	890.8	817.7	861.7	844.4
CAFS_HM_T_00042897	0.784734	0.000211	Canalicular multispecific organic anion transporter 2	1128.6	1141.9	1103	1103.6	1210.4	1054.9	857.5	909.3	880.5
CAFS_HM_T_00061524	0.784886	0.005071	Ras-related protein Ral-A	223.6	237.9	220	208	235.8	182.5	182.1	187.8	165
CAFS_HM_T_00066394	0.785024	0.001167	Active breakpoint cluster region-related protein	519.4	561.7	522.8	479.2	539.1	448.2	415	418.8	425.3
CAFS_HM_T_00085126	0.785487	0.019792	Caspase-1	350.4	318.2	366.3	271.4	288.6	285.1	271.7	246.9	294.3
CAFS_HM_T_00018915	0.785745	6.72e-06	Gelsolin	10822.4	10637.6	10753.5	10233.2	10914.6	9765.6	8334.7	8504.5	8472.4
CAFS_HM_T_00025589	0.786	0.000575	Complement C1q-like protein 4	179	173	173.7	151.4	148.3	148.1	131.7	138.6	142.9
CAFS_HM_T_00050362	0.786055	9.11e-05	Gelsolin	4728.8	4657.9	4526.7	4346.8	4952.1	4140.2	3680.1	3612.4	3644.2
CAFS_HM_T_00065701	0.787052	3.89e-05	D-amino-acid oxidase	188	194.1	189.4	163.6	174.1	156.5	148.7	151.7	149.4
CAFS_HM_T_00024315	0.787652	0.000674	Ras-related protein Rap-1b	770.2	783.5	754.3	703.9	746.4	675.2	605.5	632	580.4
CAFS_HM_T_00024279	0.787888	0.003521	Voltage-dependent calcium channel subunit alpha-2/delta-1	509.4	567	517.1	490.1	549.5	466.3	414.2	417.3	424
CAFS_HM_T_00018859	0.788441	0.001227	Septin-9	64.4	60.7	63.5	45.9	61	50.8	47.4	51.5	49.8
CAFS_HM_T_00021265	0.788572	0.000442	Calpain-2 catalytic subunit	3776.7	3798	3573.3	3683.3	3675.5	3247.2	2896.2	2937.8	2957
CAFS_HM_T_00003170	0.788603	0.003185	Calcium/calmodulin-dependent protein kinase type II subunit beta	309.2	326.9	301	315.8	353	298.4	249.4	256.8	232.8
CAFS_HM_T_00085522	0.788641	0.004689	Ubiquitin-conjugating enzyme E2	104.4	112.5	105.3	94.2	109.4	101	81.7	81.6	90.8
CAFS_HM_T_00046638	0.788794	0.018398	Macrophage mannose receptor 1-like protein 1	325.1	315.9	342.4	308.9	278.8	285	290	235.7	250
CAFS_HM_T_00081358	0.789751	0.000984	Fibronectin	766.7	804.5	743.2	703.1	670.7	667.6	604.5	620.7	602.6
CAFS_HM_T_00079515	0.789777	0.001616	Tubulin alpha chain	163.9	170	168.9	158.1	159.4	149.6	129	127.3	140.8
CAFS_HM_T_00040325	0.790538	0.012024	Succinyl-CoA:3-ketoacid-coenzyme A transferase 1, mitochondrial	1901	1979.7	1714.6	1665.5	1706.4	1523.6	1454.7	1556.5	1412.1
CAFS_HM_T_00089914	0.790657	0.000393	EMILIN-1	2489.8	2446	2466.9	2207.9	2329.4	2101.2	1901.2	2041.6	1910.2
CAFS_HM_T_00089912	0.791318	0.000191	EMILIN-1	2511.2	2493.9	2438.3	2201.3	2196.8	2056.2	1945.6	2026.5	1918
CAFS_HM_T_00021595	0.791375	0.010652	Kinesin light chain 4	134	117.5	119.5	83.7	93.2	90.2	96.7	94.5	102.4
CAFS_HM_T_00064723	0.791441	1.82e-05	Hexokinase-2	2007.6	1990	2042.9	1748.1	1806.1	1667.6	1591.3	1580.7	1608.7
CAFS_HM_T_00027612	0.791939	0.001979	Tumor protein D52	1547.4	1609.8	1648.6	1591.4	1599.3	1514	1225.6	1339.6	1240.7
CAFS_HM_T_00051562	0.792386	0.000191	Rho-related GTP-binding protein RhoG	302.7	293.6	307.3	272.9	264.5	223.5	233.7	241.7	240.6
CAFS_HM_T_00020940	0.793462	0.00015	PDZ and LIM domain protein 1	4196.1	4108.8	4192.1	4133.3	4079.3	3730.3	3368.4	3350.5	3197
CAFS_HM_T_00021110	0.7936	0.00743	Multimerin-2	427.8	426.5	423.8	385.7	362.8	356.5	330.9	329.1	354.3
CAFS_HM_T_00061271	0.793756	0.00134	Protein FAM49B	992.5	1065.2	1004.2	946.2	979.2	819.6	836.3	804.3	789.8
CAFS_HM_T_00056248	0.794321	0.000575	Integrin alpha-5	527.7	545.5	515.2	516.5	511.9	469.5	408.1	423.4	430.2
CAFS_HM_T_00052415	0.794531	0.010832	Formin-binding protein 1	212.4	195.4	224.9	187.8	195	176.9	176.4	162.4	163.9
CAFS_HM_T_00040654	0.795294	0.002053	Ras association domain-containing protein 2	409.4	412.2	398.2	362.4	390	316.8	306.7	343.8	319.6
CAFS_HM_T_00062815	0.796627	0.002959	GTPase IMAP family member 8	330.7	347.9	317.6	252	302.8	283.5	274.5	254.8	264.3
CAFS_HM_T_00052961	0.796833	3.17e-05	Spectrin beta chain, brain 1	15030.7	15174.4	14763.8	13855.4	14112.6	12816.7	11909	12103.7	11820
CAFS_HM_T_00048587	0.797196	7.92e-06	Protein NDRG2	816.2	827	832.1	733.8	687	698.8	664	653.3	656
CAFS_HM_T_00068145	0.797277	0.000607	Oligophrenin-1	177.3	184.6	174.3	169.4	170.4	157.6	138.4	145.1	144
CAFS_HM_T_00002375	0.797339	0.007182	--	1522.7	1481.9	1429.9	1405	1333.2	1288.6	1172.6	1184.6	1178.6
CAFS_HM_T_00015632	0.797552	0.000115	ATP-citrate synthase	11302.9	11476.9	11747.5	10437.3	9439.4	10404.5	9351.3	9093.6	9092.4
CAFS_HM_T_00038520	0.798598	0.000516	Septin-2	916	961.1	933.2	880.1	959.6	827.9	730.9	773.5	739.9
CAFS_HM_T_00002484	0.79943	0.002865	Ig mu chain C region membrane-bound form	655.2	656.4	686.7	656.7	597.2	628.7	519.9	567.5	510.1
CAFS_HM_T_00022812	0.799472	0.000111	Sorbin and SH3 domain-containing protein 1	464.1	452.6	448.2	439.9	448	397.7	357.5	370.4	363.3
CAFS_HM_T_00009159	0.799768	0.002802	--	995.3	936.1	1001.7	587	601.7	573.3	750.3	772.9	822.6
CAFS_HM_T_00049725	0.799779	0.000584	Vitronectin	3256.2	3140.6	3210.1	2640.5	2437.2	2560.5	2451.7	2601.2	2630.5
CAFS_HM_T_00080229	0.799989	0.001956	CD302 antigen	1193.3	1144.8	1196.7	1030.7	988.9	1022.1	889.3	954.2	984.3
CAFS_HM_T_00044873	0.801104	0.000738	72 kDa type IV collagenase	1164.9	1171.1	1124.1	1082.9	1007.6	1000.3	901	963.2	907.7
CAFS_HM_T_00071148	0.801568	0.004876	Sodium/potassium-transporting ATPase subunit alpha-1	5953.4	6017.4	5737	4992.6	6049.2	4902	4746.4	4729.7	4717.9
CAFS_HM_T_00088954	0.80174	0.000818	Dipeptidyl peptidase 1	2828.5	2679.7	2825.8	2286.9	2513.2	2314.3	2217.2	2171.2	2293.3
CAFS_HM_T_00086340	0.802889	0.00255	Neutral amino acid transporter B(0)	112	110.4	109.9	107.1	108.5	90.7	92.7	91.5	82.6
CAFS_HM_T_00053830	0.802894	0.023873	WAS/WASL-interacting protein family member 2	408.7	403.5	355.7	335.2	373.7	311.3	309.3	337.5	290.9
CAFS_HM_T_00081008	0.803196	0.008837	Serine/threonine-protein phosphatase 6 regulatory ankyrin repeat subunit C	198.8	226	213.4	181.6	186.1	186.3	163.2	173.4	176
CAFS_HM_T_00083470	0.803626	0.002896	Ras-related protein Rab-25	617.7	621.6	580.7	583.3	564.7	500.9	478.4	513	471.2
CAFS_HM_T_00013914	0.804087	9.17e-06	Synaptic vesicle membrane protein VAT-1 homolog	5089.7	5162.3	5094.6	4735.1	4873.6	4420.4	4101	4164	4075
CAFS_HM_T_00038243	0.804309	8.23e-05	Methyl-CpG-binding protein 2	546	558.8	538.1	513.9	499.3	489	443.3	435.3	442.8
CAFS_HM_T_00036489	0.804773	0.000102	Lysozyme g	1345	1327.9	1382.9	1216.6	1226	1147.6	1090.6	1078	1095.4
CAFS_HM_T_00057775	0.805013	6.43e-05	Cysteine string protein	383.9	396	397.1	348.6	396.4	335.5	317.8	313.6	316.1
CAFS_HM_T_00084337	0.80536	0.01846	Carcinoembryonic antigen-related cell adhesion molecule 3	78.1	69.8	79.7	86.2	81.8	78.7	65.7	58.3	59.3
CAFS_HM_T_00092436	0.80591	0.004026	UPF0317 protein C14orf159 homolog, mitochondrial	876.3	901	879.2	936.8	802.5	750.5	677.8	768.5	694.6
CAFS_HM_T_00025437	0.80593	0.002855	Filamin-C	1144.8	1157.1	1074.2	1124.6	1207.8	1003.9	924.9	931.5	864.5
CAFS_HM_T_00087268	0.806762	0.000339	NACHT, LRR and PYD domains-containing protein 3	5741.6	5727	5618.6	5107.7	5522.8	4745.6	4584.6	4753.4	4447.3
CAFS_HM_T_00069451	0.807611	8.9e-06	Heat shock protein beta-1	2582.3	2623.8	2577.6	2379.4	2567.5	2214.2	2108.3	2100.9	2077
CAFS_HM_T_00061666	0.807968	0.000147	Histone H1	714.6	733.1	746.2	607.3	632.2	594.2	590.7	584.2	597.7
CAFS_HM_T_00063801	0.808121	0.001627	Testin	760.3	766.7	709.3	708.3	737	633.5	593.1	603.2	610.9
CAFS_HM_T_00070814	0.808209	0.001913	--	745.5	791.1	734.1	655.7	710.5	623.1	631.4	601.5	602.3
CAFS_HM_T_00088432	0.808421	0.000141	Apoptosis-inducing factor 3	2443.2	2508.1	2416.4	2239.8	2203.4	2180.1	1948.1	2007	2001.1
CAFS_HM_T_00054197	0.808559	0.00053	Calcium/calmodulin-dependent protein kinase type 1	1724.8	1652.7	1686.2	1509.8	1683.4	1532.7	1316.8	1385.2	1392.3
CAFS_HM_T_00051077	0.808577	4.4e-05	Voltage-dependent anion-selective channel protein 1	3430.2	3363.4	3335.3	3244	3247.5	3098.6	2697.8	2762.6	2729.6
CAFS_HM_T_00015210	0.808968	0.001206	Cytokine receptor-like factor 3	299.8	322.8	311.8	270.7	293.1	274.8	250.1	257.7	248.1
CAFS_HM_T_00027689	0.809025	0.004418	Polypeptide N-acetylgalactosaminyltransferase 12	364.9	376.1	338.2	344.3	375.5	313.6	291.4	284.3	297.4
CAFS_HM_T_00082797	0.809134	0.00188	NADP-dependent malic enzyme	9816.9	9988.9	10220.5	10089.8	9657	10419.6	8478.5	7670.6	8146.2
CAFS_HM_T_00029198	0.809144	0.001846	--	1138.2	1121.7	1165.2	1042.3	1078.4	1115.2	890.8	977.1	903.5
CAFS_HM_T_00063142	0.809736	0.000317	Histone H1	308.9	303.2	308.2	245.4	281.6	249.1	239.1	251.8	254.3
CAFS_HM_T_00008904	0.810203	0.006804	--	202.1	216.4	191.1	216.1	202.7	190.3	165.7	166.8	161.4
CAFS_HM_T_00086973	0.81023	0.002426	Secretogranin-2	45.6	43.7	45.6	43.7	41.1	36.5	34.3	37.8	37.2
CAFS_HM_T_00067519	0.8103	0.034646	Mediator of RNA polymerase II transcription subunit 22	38.9	38.4	39.2	32.7	41.7	39	30	30	34.4
CAFS_HM_T_00018489	0.810432	0.02218	Multidrug resistance-associated protein 4	62.9	60.7	54.7	56.4	51.4	52	51.4	48.3	44.8
CAFS_HM_T_00077951	0.810653	0.005648	Interferon-induced protein 44	699.3	677.8	757.6	621.6	667.7	636	590.9	567.3	572.3
CAFS_HM_T_00077024	0.81085	0.001665	Eukaryotic initiation factor 4A-II	427.1	428.9	401.2	403.8	392.8	364.4	342.3	347.9	329.2
CAFS_HM_T_00062517	0.81093	5.26e-05	Anoctamin-10	306.1	313.2	308.4	282.3	299.5	295	246.1	252	254.2
CAFS_HM_T_00016649	0.810972	9.21e-05	Choline transporter-like protein 2	894.5	896.4	868.5	812.3	814.5	766.7	710.7	729.4	716.6
CAFS_HM_T_00029953	0.811594	0.000751	--	1607.4	1548.2	1547	1269.4	1406	1281.3	1224.1	1306.9	1285.6
CAFS_HM_T_00081392	0.811822	0.001993	Four and a half LIM domains protein 2	1299.8	1404.1	1398.6	1272.2	1365.8	1226.5	1091.6	1107.2	1131.7
CAFS_HM_T_00027074	0.811884	0.000188	Probable 10-formyltetrahydrofolate dehydrogenase ALDH1L2	5421.8	5401.7	5571.2	6520	5014.7	5128.9	4330.1	4521	4459.5
CAFS_HM_T_00056015	0.812129	0.002127	6-phosphofructo-2-kinase/fructose-2,6-biphosphatase 2	462.5	491.1	494.2	452.6	452.8	419.4	398.5	401.2	376.1
CAFS_HM_T_00015555	0.812323	0.000628	Septin-9	801.8	783.1	778.2	713.3	722.5	680.7	632.8	665.8	621
CAFS_HM_T_00086369	0.812574	0.004488	Calcium-activated chloride channel regulator 4	109.8	117.3	111.7	83.6	94.7	85.7	90.5	97.3	87.5
CAFS_HM_T_00043635	0.813529	0.001616	Integrin beta-3	747.2	748.1	710.4	963	1007.2	807.2	611.2	611.3	571.9
CAFS_HM_T_00060246	0.813781	0.000189	Annexin A13	4764.1	4782.8	4633.2	4268.4	4404.4	4187.2	3898.5	3752.6	3888.4
CAFS_HM_T_00082978	0.813808	3.71e-06	Prelamin-A/C	8248.7	8181.7	8228.5	7040.7	7740.6	7094.6	6614.3	6714.4	6738.9
CAFS_HM_T_00028007	0.814498	4.18e-05	Adenylyl cyclase-associated protein 1	6134.1	6053.5	5970.7	5437.9	5911	5327.1	4924.6	4990.7	4874.6
CAFS_HM_T_00063619	0.81525	0.002633	Creatine kinase U-type, mitochondrial	5776.9	5926.7	5469.3	4877.5	5754.7	4849.1	4776.3	4722.2	4501.7
CAFS_HM_T_00018240	0.816038	0.044239	Cytoplasmic protein NCK2	237.6	233	207.8	215.8	224.1	195.1	186.4	184.8	182.4
CAFS_HM_T_00016273	0.816299	0.005428	--	325.8	327.4	307.6	353.1	337.1	300.7	273.5	266.2	244.6
CAFS_HM_T_00014931	0.816485	0.00597	Protein NLRC3	158.9	166.7	151.2	221.7	191	173.7	133.5	132.3	123.5
CAFS_HM_T_00020330	0.817536	3.06e-05	Coiled-coil domain-containing protein 109A	1608.6	1628.8	1601.9	1411.1	1532.2	1395.3	1341.2	1303.3	1311.8
CAFS_HM_T_00065089	0.817794	0.04617	Transcobalamin-1	245	242.8	239.4	232.3	243.4	250.2	188.5	218.6	187.6
CAFS_HM_T_00018569	0.81862	0.018044	Cytoplasmic dynein 1 intermediate chain 2	271.4	302	298.8	325.2	261.4	245.7	251.8	242.6	219.6
CAFS_HM_T_00024834	0.818858	0.003107	High mobility group protein B3	2914.7	2813.9	2702.9	2348.8	2611.1	2303.3	2245.8	2404	2254.4
CAFS_HM_T_00032624	0.820033	0.019311	Cysteine-rich protein 2	85.6	79.8	80.2	75.5	73.4	75	64.5	63	73.9
CAFS_HM_T_00007248	0.820317	0.005548	Poly [ADP-ribose] polymerase 14	115.3	107.2	105.3	104.7	103.7	102.6	89.7	92.9	86.3
CAFS_HM_T_00013652	0.82056	0.031678	Granulins	208.7	180.6	207	166.6	197.5	197.2	154.7	175.2	159.4
CAFS_HM_T_00010984	0.822572	0.005779	Serine/threonine-protein kinase ULK3	1313.7	1368	1248.9	1134.9	1321.8	1112.7	1040.9	1128.3	1064
CAFS_HM_T_00056619	0.822577	0.013877	V-type proton ATPase subunit S1	171.7	167.9	154.7	148.1	165	133	136.3	143.3	127
CAFS_HM_T_00041710	0.822669	0.000435	Calcium/calmodulin-dependent protein kinase type II subunit gamma	669.5	689.6	664.8	652.3	660.8	608.6	571.3	545	548.7
CAFS_HM_T_00014056	0.822785	0.010462	Chromobox protein homolog 1	153.8	139.4	141.3	126.1	130.6	113.2	118.1	113.9	125.5
CAFS_HM_T_00087255	0.823064	0.010116	NACHT, LRR and PYD domains-containing protein 3	304.6	317.1	288.8	259.1	311.5	282.4	255.7	233.3	260.4
CAFS_HM_T_00075825	0.824603	0.000402	Serine/threonine-protein kinase PAK 2	889.9	893.8	862.3	735.4	802.4	750.8	717	747.6	717.3
CAFS_HM_T_00073761	0.824852	0.016771	Protein tweety homolog 3	110	115.1	112.9	107.9	98.8	105.1	89.8	86.7	102.3
CAFS_HM_T_00091015	0.824972	0.007377	NACHT, LRR and PYD domains-containing protein 12	291.4	305.7	291.9	278.9	254.8	282	244	245.6	243.8
CAFS_HM_T_00007023	0.825035	0.001018	Rab GTPase-activating protein 1	382.1	389.1	369.6	338.3	388.5	372.2	303.2	318.9	319.1
CAFS_HM_T_00032218	0.82555	0.007609	Protein Hook homolog 1	191.1	189.1	178.7	168.2	179.7	153.1	162.4	144.2	154.8
CAFS_HM_T_00036378	0.825705	0.000142	SH3 domain-binding glutamic acid-rich-like protein	2902.2	2818.4	2819.5	2560.1	2887.9	2572.5	2322.3	2337.3	2392
CAFS_HM_T_00070916	0.826315	0.015879	Cyclic AMP-responsive element-binding protein 1	337.8	315.6	301.2	269	298.7	261.5	245.7	269.4	273.7
CAFS_HM_T_00022110	0.826687	0.009836	Calcium uptake protein 1, mitochondrial	394.1	392.9	351.4	371.2	380.2	345.2	309.3	316.7	315.1
CAFS_HM_T_00033864	0.826765	0.006435	Serine/threonine-protein phosphatase 2A 56 kDa regulatory subunit epsilon isoform	331.9	346.4	321.5	304.7	336.9	307.8	260.6	276.4	289.6
CAFS_HM_T_00013202	0.826837	6.74e-05	Putative oxidoreductase GLYR1	1696.2	1693	1662.1	1501.4	1491.6	1430.6	1400.7	1366.6	1409.3
CAFS_HM_T_00011334	0.82696	0.008041	Guanine nucleotide-binding protein G(o) subunit alpha	351.4	377.3	361.8	299.6	327.1	305.8	298.9	283.5	319.4
CAFS_HM_T_00022042	0.827565	0.007132	Nuclear receptor coactivator 4	1162.7	1076.9	1164	873.3	874	901.9	893.3	982.1	941.3
CAFS_HM_T_00089086	0.828522	0.022384	Coagulation factor IX	221.7	197.9	210.8	192	211.8	177	159.7	181.3	181.3
CAFS_HM_T_00078512	0.828608	0.019641	Spermine oxidase	345.6	357.6	309.1	294.9	309.4	289	272.1	288.5	278.2
CAFS_HM_T_00090222	0.828612	0.000236	Malate dehydrogenase, cytoplasmic	3189.9	3236.1	3098.6	2918.8	2956.9	2712.7	2649.8	2644.1	2598.3
CAFS_HM_T_00092356	0.82909	0.037596	Disintegrin and metalloproteinase domain-containing protein 17	209.3	235.6	226.8	217.3	221.1	201.4	166.1	193.6	197.2
CAFS_HM_T_00013295	0.829219	0.005593	--	424.4	439.8	468.5	445.5	452.7	397	378.5	366.2	360.4
CAFS_HM_T_00052091	0.829428	0.00022	Actin-related protein 2/3 complex subunit 3	2894.1	2901.9	2803.9	2585	2721.4	2554.5	2414.4	2338	2380.6
CAFS_HM_T_00048147	0.829592	0.001956	Huntingtin-interacting protein K	255.5	271.6	256.9	249.6	237	236.2	211.6	215.6	223.2
CAFS_HM_T_00024454	0.829675	0.000154	L-lactate dehydrogenase B chain	3770.1	3648.4	3655.6	3468.1	3410.4	3344.1	3042.2	3106.5	3039.2
CAFS_HM_T_00003386	0.829709	0.002081	Ras-related protein Rab-3C	229.7	240.8	233	247.9	226.6	225.1	198.2	200	185.5
CAFS_HM_T_00064294	0.829823	3.39e-05	Acid trehalase-like protein 1	1751.4	1710.3	1718.2	1502.4	1552.8	1530	1441.3	1419	1438.1
CAFS_HM_T_00020870	0.830434	0.000335	Cytosolic purine 5&apos;-nucleotidase	735.7	727.5	733	663.1	701.8	643.3	609.4	588.9	625.5
CAFS_HM_T_00006496	0.830518	0.034434	MYC-induced nuclear antigen	470.6	531.4	454.2	539.5	503.4	432.6	407.8	381.5	420.1
CAFS_HM_T_00041137	0.830567	0.002566	Plexin-D1	318.2	297.8	311.8	289.1	267.2	280.3	257.2	265.3	248.1
CAFS_HM_T_00028841	0.830897	0.000134	Epiplakin	16409.3	16515	16543.1	16749	16558.9	16295.4	13594.4	14067.9	13440
CAFS_HM_T_00022306	0.831573	0.000875	Thioredoxin-related transmembrane protein 1	555.9	568	542.7	498.2	523.5	517.9	450.2	476	459.7
CAFS_HM_T_00044281	0.831642	0.005434	Glucose-6-phosphatase	358	364	371.5	293.6	269.1	318.3	288.7	297.1	323.6
CAFS_HM_T_00053791	0.832359	0.027899	Lymphocyte antigen 75	211.9	226.4	211.9	196.8	180.1	168.5	178.8	197.8	164.6
CAFS_HM_T_00004821	0.832463	0.000598	Collagenase 3 (Fragment)	1828	1821.7	1882.2	1398.1	1348.1	1415.9	1517.8	1584	1503.3
CAFS_HM_T_00086998	0.833018	0.020506	Calpain-9	69	74.6	67.8	53.8	75.6	56	63.3	57.4	55.4
CAFS_HM_T_00078715	0.83307	0.003266	TGF-beta receptor type-2	583.7	568.6	556.8	555.1	515.5	470.7	497.9	453.1	472.8
CAFS_HM_T_00068155	0.833175	0.000191	Ephrin-B1	386.3	389.2	383.2	327.4	343.3	341.3	322.4	313.6	329.4
