# Supplementary material for: Tandem Mass Tagging-Based Quantitative Proteomics Analysis Reveals Damage to the Liver and Brain of Hypophthalmichthys molitrix Exposed to Acute Hypoxia and Reoxygenation
Source: Antioxidants (Basel). 2022 Mar 19;11(3):589. doi: 10.3390/antiox11030589 (PMC8945220; doi:10.3390/antiox11030589)
Supplement: Supplementary file 1 [file antioxidants-11-00589-s001.zip › Table S7.xls]

## Sheet: hy_5h vs ck_0h
Table S7. The differentially abundant proteins (DAPs) in brain among three groups.
DAPs in hy_5h vs ck_0h
Up-regulated
Protein	Fold Change	P.value	Annotation	ck_0h_1	ck_0h_2	ck_0h_3	hy_5h_1	hy_5h_2	hy_5h_3	re_5h_1	re_5h_2	re_5h_3
CAFS_HM_T_00067100	2.25	0.026797	Cytosolic phospholipase A2 gamma	470.2	485.9	874.8	1368.9	1349.2	1409.8	966.6	631.9	1558.9
CAFS_HM_T_00001805	1.92	0.014719	--	172.8	124	159.8	231.1	313.9	329.9	362.8	200.6	159.1
CAFS_HM_T_00064527	1.71	0.020848	60 kDa lysophospholipase	708.7	697.3	609.8	1270.5	899.6	1282	627.3	783.8	1198.8
CAFS_HM_T_00067097	1.37	0.011557	Cytosolic phospholipase A2 gamma	105.5	128.1	108.4	143.8	161.1	165.3	135.4	133.3	156.2
CAFS_HM_T_00067442	1.36	0.011831	Transmembrane protein 132C	21.7	17.1	19.5	26.2	25	28	19.7	25.3	18.6
CAFS_HM_T_00020837	1.34	0.022072	GTP-binding protein SAR1b	33	27	25	38.6	35.8	39.1	38.3	34.7	28.4
CAFS_HM_T_00069880	1.29	0.043525	Claudin-6	144.1	161.7	121.2	168.4	194.6	187	173.9	99.2	275
CAFS_HM_T_00075296	1.29	0.045008	Protein FAM110B	10.5	7.8	10.7	12.7	12.9	11.9	12.7	13.7	9.1
CAFS_HM_T_00054834	1.25	0.019747	Inter-alpha-trypsin inhibitor heavy chain H3	122.8	145.7	126	170.4	169.1	154.4	152.9	199.3	138.4
CAFS_HM_T_00071842	1.25	0.013734	Cyclin-dependent kinase inhibitor 2A	129.2	143.5	142	159.7	182.6	174.1	189.8	160.4	203.3
CAFS_HM_T_00089830	1.25	0.01518	Protein KIAA0284	246.7	272.6	233.4	293.3	324.6	324.5	336.4	270.9	273
CAFS_HM_T_00008224	1.23	0.014849	Complement C3	505.3	520.3	592.4	692.3	654.8	645.5	671.3	528.1	554.6
CAFS_HM_T_00012176	1.22	0.009002	Neprilysin	19.3	18	18.5	24.2	22	21.8	22.8	25	24.2
CAFS_HM_T_00026772	1.21	0.005664	Epidermal growth factor receptor kinase substrate 8	78.5	73	81	93.2	97.3	90.9	99	73.6	72.6
CAFS_HM_T_00080586	1.21	0.017942	Intraflagellar transport protein 88 homolog	43.2	39.9	44.5	49	55.2	50.4	42.6	46.5	51.6
Down-regulated
Protein	FC	P.value	Annotation	ck_0h_1	ck_0h_2	ck_0h_3	hy_5h_1	hy_5h_2	hy_5h_3	re_5h_1	re_5h_2	re_5h_3
CAFS_HM_T_00076386	0.63	0.022833	Calcyphosin-like protein	3790.4	2782.5	3525.6	1886.6	2456.8	1990.6	2993.5	2417.2	2947.8
CAFS_HM_T_00067482	0.69	0.035437	Glycolipid transfer protein	603.5	726.9	788.2	442.7	437.4	575.9	714.2	445	519.3
CAFS_HM_T_00024075	0.71	0.010153	Pyridine nucleotide-disulfide oxidoreductase domain-containing protein 1	21	20.1	24.1	15.7	16.4	14.2	19.7	16.5	17.9
CAFS_HM_T_00063820	0.72	0.026682	Protein preY, mitochondrial	11.9	12	11.3	9.7	9	6.6	9.4	7.6	9.1
CAFS_HM_T_00013554	0.73	0.007569	ADP-ribosylation factor-like protein 6-interacting protein 1	8	7.9	8.5	6.2	6.5	5.2	5.6	8.1	9.3
CAFS_HM_T_00077001	0.73	0.02013	Ubiquitin carboxyl-terminal hydrolase 33	21.4	19.1	18.9	15.1	12	16	16.2	15.6	17.4
CAFS_HM_T_00065717	0.74	0.022955	Fructose-1,6-bisphosphatase 1	256.4	290	231.6	198.1	177.9	202.4	152.1	311.1	229.7
CAFS_HM_T_00010089	0.75	0.007122	Orphan sodium- and chloride-dependent neurotransmitter transporter	322.6	274	289.1	225.6	214.8	221.6	228.2	234.5	258.6
CAFS_HM_T_00075276	0.75	0.045042	Serine--pyruvate aminotransferase, mitochondrial	59.1	68.7	52.1	43.6	42.4	48.9	35.6	66.5	47
CAFS_HM_T_00010745	0.78	0.002891	Delta and Notch-like epidermal growth factor-related receptor	1765.8	1768.5	1650.8	1415.7	1356.9	1263.3	1114.9	1456.8	1360.7
CAFS_HM_T_00034766	0.79	0.043192	Myelin proteolipid protein	676.3	712.4	727.4	487.5	537.2	649.9	696.2	511.9	638.7
CAFS_HM_T_00039938	0.8	0.026407	Catechol O-methyltransferase	2432.1	2448.6	2109	1836.8	1734.2	2009.8	2032.4	1510	1778
CAFS_HM_T_00004449	0.81	0.003086	Delta(14)-sterol reductase	713.4	710.3	655.8	578.8	551.5	555.6	578	652.4	640.9
CAFS_HM_T_00006235	0.82	0.019778	Gamma-glutamyl hydrolase G	151.6	148.2	161.5	120.5	138.6	120.3	114.3	134.1	130.8
CAFS_HM_T_00062320	0.83	0.04134	Microtubule-associated protein 1A	1592.1	1456	1408.7	1229.3	1118.3	1346.3	1355.3	1141.2	1320

## Sheet: re_5h vs hy_5h
Table S7. The differentially abundant proteins (DAPs) in brain among three groups.
DAPs in re_5h vs hy_5h
Up-regulated
Protein	Fold Change	P.value	Annotation	ck_0h_1	ck_0h_2	ck_0h_3	hy_5h_1	hy_5h_2	hy_5h_3	re_5h_1	re_5h_2	re_5h_3
CAFS_HM_T_00037475	1.46	0.01764	Arf-GAP with Rho-GAP domain, ANK repeat and PH domain-containing protein 3	9.9	11.7	6.4	8.2	11	12	14.3	15.4	16
CAFS_HM_T_00067824	1.4	0.019567	Transcobalamin-2	26.3	38.2	33.2	33.4	36.7	28	48.7	41.1	47.4
CAFS_HM_T_00031740	1.37	0.046826	Neuroblastoma-amplified sequence	29.7	17.7	12.1	12.4	19.2	17.8	21.9	22.1	23.8
CAFS_HM_T_00085088	1.24	0.032486	Neuronal acetylcholine receptor subunit beta-2	30.4	24.6	30.6	26.7	31.8	28.6	35.4	38.7	33.5
CAFS_HM_T_00075896	1.23	0.00889	Complement C1q-like protein 2	350.6	489.1	430.9	466.9	456.2	439.4	540.5	599.7	536.3
CAFS_HM_T_00032224	1.22	0.046573	Cytochrome P450 2J6	37.9	42.3	39.3	41.4	36	37.2	44.2	43.9	51.2
CAFS_HM_T_00041172	1.21	0.043174	Protein bassoon	873.6	806.8	810.3	814.3	932	912.9	989.7	1164.8	1054.9
CAFS_HM_T_00052763	1.2	0.011045	MMP37-like protein, mitochondrial	1264.3	1148.3	1222	1128.6	1087.7	1198	1450.4	1341.4	1318.6
Down-regulated
Protein	FC	P.value	Annotation	ck_0h_1	ck_0h_2	ck_0h_3	hy_5h_1	hy_5h_2	hy_5h_3	re_5h_1	re_5h_2	re_5h_3
CAFS_HM_T_00065868	0.72	0.000214	--	2108.3	5141.2	1336.5	1681.5	1722.6	1605.2	1228.5	1198.2	1192.7
CAFS_HM_T_00023528	0.76	0.009605	Tyrosine-protein kinase Mer OS=Mus musculus	54.2	80.8	47.5	72.7	62.8	63.2	49.2	52.1	50.7
CAFS_HM_T_00014274	0.77	0.015945	Solute carrier family 15 member 4	25.6	27.5	23.2	31.2	27.7	33.4	24.8	23.5	22.7
CAFS_HM_T_00002764	0.78	0.029203	Coagulation factor X	40.8	40.3	35.1	43.9	43.6	40.5	38.3	31.4	29.5
CAFS_HM_T_00060587	0.79	0.048697	Ig kappa chain V-IV region (Fragment)	242.9	258.6	215.4	252.7	255.8	207.2	203.6	187.2	171.2
CAFS_HM_T_00081378	0.79	0.041401	Probable uridine nucleosidase 1	268	334.9	208	357.1	330.2	323.8	235	261.2	307
CAFS_HM_T_00085010	0.79	0.045214	Engulfment and cell motility protein 1	43.2	31.9	37.6	40.6	36.6	42.7	32.7	27.4	35
CAFS_HM_T_00006719	0.81	0.01449	Antihemorragic factor cHLP-B	12686.6	11073	12228.7	14354.6	15051.4	13321	12213.9	11632.8	10771.4
CAFS_HM_T_00020830	0.82	0.010969	Zinc finger CCHC domain-containing protein 24	15	17.3	17	18.8	17.5	18.2	13.7	15.8	15.2
CAFS_HM_T_00001368	0.83	0.026736	Serotransferrin-1	28033.9	28113.9	19173.3	26581.7	26302.6	22870.2	20488.1	21732.6	20639.1

## Sheet:  re_5h vs ck_0h
Table S7. The differentially abundant proteins (DAPs) in brain among three groups.
DAPs in re_5h vs ck_0h.
Up-regulated
Protein	Fold Change	P.value	Annotation	ck_0h_1	ck_0h_2	ck_0h_3	hy_5h_1	hy_5h_2	hy_5h_3	re_5h_1	re_5h_2	re_5h_3
CAFS_HM_T_00058058	1.89	0.011675	Complement component (3b/4b) receptor 1	246.9	328.2	184.4	334.8	449.5	484	499	515	419.5
CAFS_HM_T_00040661	1.72	0.012781	Calsenilin	360.3	457.1	343.7	459.7	556.9	607	593	773.6	632.9
CAFS_HM_T_00037475	1.63	0.022527	Arf-GAP with Rho-GAP domain, ANK repeat and PH domain-containing protein 3	9.9	11.7	6.4	8.2	11	12	14.3	15.4	16
CAFS_HM_T_00006505	1.51	0.039009	--	669.8	439.2	615.7	859.7	703.2	767.6	752.8	864.7	986.1
CAFS_HM_T_00073432	1.44	0.023221	Chloride intracellular channel protein 6	55.3	58.5	43.5	71.7	58.6	80.7	66.4	80.5	79.6
CAFS_HM_T_00085647	1.41	0.022453	Somatostatin-1A	352	424.6	328.7	445.3	451.7	412	541.9	553.7	459.2
CAFS_HM_T_00067824	1.4	0.034327	Transcobalamin-2	26.3	38.2	33.2	33.4	36.7	28	48.7	41.1	47.4
CAFS_HM_T_00005946	1.4	0.006413	--	337.5	288.5	298.3	355.7	833	337.4	395.2	443.8	454.1
CAFS_HM_T_00008157	1.38	6.17e-05	Complement factor H	77.1	81.3	78.9	83.5	306	239.2	108.3	112	108.3
CAFS_HM_T_00021067	1.38	0.03742	--	366.6	343.2	364	402.9	424	371.1	413	563.1	505.7
CAFS_HM_T_00009568	1.37	0.011179	Complexin-3	759.2	708	733.2	972.8	1139.3	761.9	890.9	1088.8	1027.9
CAFS_HM_T_00036752	1.37	0.008715	Cohesin subunit SA-1	75.7	88.8	72.6	78.9	136.8	94.4	101.5	113.4	109.5
CAFS_HM_T_00086575	1.37	0.034034	Hepatocyte cell adhesion molecule	723.3	802.1	692.1	706.2	814.5	955.2	1028.6	864.1	1135.1
CAFS_HM_T_00049397	1.36	0.0199	Solute carrier family 22 member 6-A	71.4	73.1	66.1	83.6	85.2	79.5	85.9	107.6	92.9
CAFS_HM_T_00017643	1.33	0.027027	CaM kinase-like vesicle-associated protein	1202.2	1189.3	1141.2	1472.8	1803.3	1260.4	1414.2	1787.8	1501
CAFS_HM_T_00071842	1.33	0.026313	Cyclin-dependent kinase inhibitor 2A	129.2	143.5	142	159.7	182.6	174.1	189.8	160.4	203.3
CAFS_HM_T_00075896	1.32	0.039857	Complement C1q-like protein 2	350.6	489.1	430.9	466.9	456.2	439.4	540.5	599.7	536.3
CAFS_HM_T_00031794	1.3	0.031518	Hippocalcin-like protein 1	198.3	178.2	203.9	255.9	243.9	191.5	226.2	280.6	246
CAFS_HM_T_00071979	1.3	0.017692	Complement C3 (Fragment)	1925.2	2456.8	2089.8	2788.3	2447.3	2360.5	2698.1	2834.5	2905.3
CAFS_HM_T_00012176	1.29	0.001934	Neprilysin	19.3	18	18.5	24.2	22	21.8	22.8	25	24.2
CAFS_HM_T_00041172	1.29	0.012492	Protein bassoon	873.6	806.8	810.3	814.3	932	912.9	989.7	1164.8	1054.9
CAFS_HM_T_00036925	1.27	0.00906	G protein-regulated inducer of neurite outgrowth 1	1382.9	1420.4	1501.8	1762.4	1975	1501.4	1729.7	1959.6	1758.3
CAFS_HM_T_00085088	1.26	0.041962	Neuronal acetylcholine receptor subunit beta-2	30.4	24.6	30.6	26.7	31.8	28.6	35.4	38.7	33.5
CAFS_HM_T_00010129	1.26	0.029433	Ankyrin repeat and BTB/POZ domain-containing protein BTBD11-B	6.8	8.6	7.7	6.3	6.8	10.4	9.1	10.1	9.9
CAFS_HM_T_00089529	1.25	0.046357	Gamma-adducin	1695.8	1901	1812.1	2178.1	2584.9	1892.4	2008.2	2527.2	2252.6
CAFS_HM_T_00012819	1.24	0.031894	Cytoplasmic phosphatidylinositol transfer protein 1	1505.1	1414.6	1673.2	1856.3	1898.4	1659.2	1741.6	2029	1916.6
CAFS_HM_T_00030244	1.24	0.008873	KH domain-containing, RNA-binding, signal transduction-associated protein 3	635.1	689.3	645.3	708.9	811.4	768.1	801.3	869.6	772.9
CAFS_HM_T_00011768	1.22	0.046278	Voltage-dependent calcium channel subunit alpha-2/delta-1	693.4	782	739.1	831.2	963.8	798.1	892.3	990.6	816.1
CAFS_HM_T_00016591	1.22	0.016831	Cytochrome P450 27C1	1147.7	1299.1	1303.2	1441.7	1457.2	1538.8	1535.8	1613.5	1442.8
CAFS_HM_T_00080753	1.22	0.041839	Collagen alpha-3(VI) chain	1140.4	1315.9	1222.7	1237.4	1794.5	1561	1638	1369.2	1493.5
CAFS_HM_T_00083340	1.22	0.043463	Protein dpy-19 homolog 1	193.4	196.4	216.1	240.2	280.8	228.4	249.7	268.3	221.7
CAFS_HM_T_00025603	1.21	0.034724	Interferon-induced guanylate-binding protein 1	25.2	27.8	22.6	28.5	36.9	30.6	30.2	31.6	29.3
CAFS_HM_T_00039853	1.21	0.012769	Netrin-G2	493.4	564.4	538.4	556.6	585.7	518.3	634.6	621.8	673.7
CAFS_HM_T_00059624	1.21	0.043399	Catenin delta-2	356.4	380.6	364.4	366.4	488.1	376.1	488.8	444	400.4
CAFS_HM_T_00072000	1.21	0.023272	Complement C3 (Fragment)	386.8	444.7	398.7	486.2	520.9	457.4	517.4	463.9	508
Down-regulated
Protein	FC	P.value	Annotation	ck_0h_1	ck_0h_2	ck_0h_3	hy_5h_1	hy_5h_2	hy_5h_3	re_5h_1	re_5h_2	re_5h_3
CAFS_HM_T_00001018	0.63	0.021808	--	500.6	581.6	686.2	645.8	352.9	535.4	416.6	328.8	372.9
CAFS_HM_T_00079799	0.63	0.007383	Immunoglobulin superfamily member 3	149.7	119.5	149.7	146.8	97.4	94.7	85.1	90.9	89.1
CAFS_HM_T_00063820	0.74	0.007124	Protein preY, mitochondrial	11.9	12	11.3	9.7	9	6.6	9.4	7.6	9.1
CAFS_HM_T_00074387	0.74	0.035307	Mitochondrial ubiquitin ligase activator of nfkb 1	959	747.4	967	798.1	710.7	692	700	626.5	640
CAFS_HM_T_00010745	0.76	0.018572	Delta and Notch-like epidermal growth factor-related receptor	1765.8	1768.5	1650.8	1415.7	1356.9	1263.3	1114.9	1456.8	1360.7
CAFS_HM_T_00039938	0.76	0.040917	Catechol O-methyltransferase	2432.1	2448.6	2109	1836.8	1734.2	2009.8	2032.4	1510	1778
CAFS_HM_T_00060587	0.78	0.030324	Ig kappa chain V-IV region (Fragment)	242.9	258.6	215.4	252.7	255.8	207.2	203.6	187.2	171.2
CAFS_HM_T_00036223	0.8	0.04151	Protein FAM13B	142.1	146.4	120.2	128.1	128.1	112.4	102.2	111.9	114.9
CAFS_HM_T_00010089	0.81	0.032693	Orphan sodium- and chloride-dependent neurotransmitter transporter	322.6	274	289.1	225.6	214.8	221.6	228.2	234.5	258.6
CAFS_HM_T_00010229	0.81	0.046701	Leucine-rich repeat-containing protein 4	164	191.2	163.7	151.2	149.7	168.8	150.5	128.3	144.1
CAFS_HM_T_00040365	0.81	0.000907	Breakpoint cluster region protein	890.5	897.4	902.1	875.8	750.6	716.4	761.6	699.6	708.6
CAFS_HM_T_00047854	0.81	0.013757	Ferritin, heavy subunit	826	928.2	881.2	707.1	749.2	926.2	692.1	765.5	685.2
CAFS_HM_T_00006235	0.82	0.020049	Gamma-glutamyl hydrolase	151.6	148.2	161.5	120.5	138.6	120.3	114.3	134.1	130.8
CAFS_HM_T_00048403	0.82	0.001083	Cytidine deaminase	267.9	269.1	256.9	241.1	221.8	235.9	218.5	208.2	222.3
CAFS_HM_T_00052474	0.82	0.030838	Starch-binding domain-containing protein 1	44	48.7	40.9	53.5	38.2	42.9	37.1	35.3	37.8
CAFS_HM_T_00085811	0.82	0.007524	Beta-secretase 1	867	915.5	842.3	836.9	777	727.5	755.3	680.5	729.1
CAFS_HM_T_00077001	0.83	0.024049	Ubiquitin carboxyl-terminal hydrolase 33	21.4	19.1	18.9	15.1	12	16	16.2	15.6	17.4
CAFS_HM_T_00006985	0.83	0.028535	Ceramide glucosyltransferase	73.4	73.4	65.1	74.3	63.2	59.9	60.6	61.3	54.3
CAFS_HM_T_00011995	0.83	0.011192	Cell cycle progression protein 1	58.4	62.8	60.3	61.1	61.4	56.2	53.3	46.7	50.7
CAFS_HM_T_00031085	0.83	0.001585	Squalene synthase	1719.5	1618.6	1640	1618.2	1550.7	1563.4	1404.3	1391	1337
CAFS_HM_T_00075413	0.83	0.003482	Glycogenin-1	4848.6	5107.3	5030.6	4762.9	4712.6	4506.9	4335.6	3926.3	4109.2
