# Supplementary material for: Tandem Mass Tagging-Based Quantitative Proteomics Analysis Reveals Damage to the Liver and Brain of Hypophthalmichthys molitrix Exposed to Acute Hypoxia and Reoxygenation
Source: Antioxidants (Basel). 2022 Mar 19;11(3):589. doi: 10.3390/antiox11030589 (PMC8945220; doi:10.3390/antiox11030589)
Supplement: Supplementary file 1 [file antioxidants-11-00589-s001.zip › Table S8.xls]

## Sheet: 27 proteins in "hy_5h vs ck_0h"
Table S8. The distribution of liver differentially abundant proteins (DAPs) in venn diagram.
27 DAPs in "hy_5h vs ck_0h" only
Protein	Gene name	Annotation
CAFS_HM_T_00075973	IFI44L	Interferon-induced protein 44-like
CAFS_HM_T_00051512	PCYT1B	Choline-phosphate cytidylyltransferase B
CAFS_HM_T_00046641	CDH1	Cadherin-1
CAFS_HM_T_00035741	Gsr	Glutathione reductase, mitochondrial
CAFS_HM_T_00048600	C1QL4	Complement C1q-like protein 4
CAFS_HM_T_00006756	SLC27A6	Long-chain fatty acid transport protein 6
CAFS_HM_T_00004114	ATP6V1B2	V-type proton ATPase subunit B, brain isoform
CAFS_HM_T_00059106	pxn1	Pentraxin fusion protein
CAFS_HM_T_00092009	APOB	Apolipoprotein B-100
CAFS_HM_T_00088603	HSPA13	Heat shock 70 kDa protein 13
CAFS_HM_T_00060165	--	Ferritin, lower subunit
CAFS_HM_T_00071251	zgc:92115	Gamma-glutamylaminecyclotransferase A
CAFS_HM_T_00017220	ptmaa	Prothymosin alpha-A
CAFS_HM_T_00048297	Nagk	N-acetyl-D-glucosamine kinase
CAFS_HM_T_00057269	TNNC2	Troponin C, skeletal muscle
CAFS_HM_T_00064844	UBI1	Polyubiquitin
CAFS_HM_T_00002448	Nlrc3	Protein NLRC3
CAFS_HM_T_00040549	TSPYL1	Testis-specific Y-encoded-like protein 1
CAFS_HM_T_00064380	--	Ferritin, heavy subunit
CAFS_HM_T_00073473	--	Myosin light chain 3, skeletal muscle isoform
CAFS_HM_T_00022151	Rnaset2	Ribonuclease T2
CAFS_HM_T_00067040	Vkorc1l1	Vitamin K epoxide reductase complex subunit 1-like protein 1
CAFS_HM_T_00063446	--	--
CAFS_HM_T_00033433	ivns1abpa	Influenza virus NS1A-binding protein homolog A
CAFS_HM_T_00001199	--	UPF0562 protein C7orf55 homolog
CAFS_HM_T_00078039	CBLN3	Cerebellin-3
CAFS_HM_T_00013438	Mylpf	Myosin regulatory light chain 2, skeletal muscle isoform

## Sheet: 41 proteins in "re_5h vs hy_0h"
Table S8. The distribution of liver differentially abundant proteins (DAPs) in venn diagram.
41 DAPs in "re_5h vs hy_0h" only
Protein	Gene name	Annotation
CAFS_HM_T_00020945	SGPL1	Sphingosine-1-phosphate lyase 1
CAFS_HM_T_00074929	Dbt	Lipoamide acyltransferase component of branched-chain alpha-keto acid dehydrogenase complex, mitochondrial
CAFS_HM_T_00034035	C14orf43	Uncharacterized protein C14orf43
CAFS_HM_T_00021080	TSPAN15	Tetraspanin-15
CAFS_HM_T_00010280	--	--
CAFS_HM_T_00014752	mkkA	Mitogen-activated protein kinase kinase kinase A
CAFS_HM_T_00085867	PHKG1	Phosphorylase b kinase gamma catalytic chain, skeletal muscle isoform
CAFS_HM_T_00070890	--	--
CAFS_HM_T_00013539	--	--
CAFS_HM_T_00037020	Fermt3	Fermitin family homolog 3
CAFS_HM_T_00047295	mtmr10	Myotubularin-related protein 10
CAFS_HM_T_00061594	C7orf10	CaiB/baiF CoA-transferase family protein C7orf10
CAFS_HM_T_00010325	GCSH	Glycine cleavage system H protein, mitochondrial
CAFS_HM_T_00025587	--	--
CAFS_HM_T_00006254	--	--
CAFS_HM_T_00002652	NLRC3	Protein NLRC3
CAFS_HM_T_00040116	Slc25a1	Tricarboxylate transport protein, mitochondrial
CAFS_HM_T_00023807	C1QL4	Complement C1q-like protein 4
CAFS_HM_T_00086274	C4b	Complement C4-B
CAFS_HM_T_00039802	acbd6	Acyl-CoA-binding domain-containing protein 6
CAFS_HM_T_00017155	INPP5D	Phosphatidylinositol-3,4,5-trisphosphate 5-phosphatase 1
CAFS_HM_T_00008426	Ppap2c	Lipid phosphate phosphohydrolase 2
CAFS_HM_T_00020406	PRKCE	Protein kinase C epsilon type
CAFS_HM_T_00040780	Aebp1	Adipocyte enhancer-binding protein 1
CAFS_HM_T_00041056	GGH	Gamma-glutamyl hydrolase
CAFS_HM_T_00046281	ACTN3	Alpha-actinin-3
CAFS_HM_T_00084971	ZNF576	Zinc finger protein 576
CAFS_HM_T_00045502	--	--
CAFS_HM_T_00008159	CFH	Complement factor H
CAFS_HM_T_00005393	CFH	Complement factor H
CAFS_HM_T_00074341	Ap1s3	AP-1 complex subunit sigma-3
CAFS_HM_T_00060798	dpyd	Dihydropyrimidine dehydrogenase [NADP+]
CAFS_HM_T_00082346	SNTB1	Beta-1-syntrophin
CAFS_HM_T_00059126	--	--
CAFS_HM_T_00085780	--	--
CAFS_HM_T_00010107	Ppfibp1	Liprin-beta-1
CAFS_HM_T_00014341	Ptchd3	Patched domain-containing protein 3
CAFS_HM_T_00054628	GIMAP8	GTPase IMAP family member 8
CAFS_HM_T_00054660	FAM116A	Protein FAM116A
CAFS_HM_T_00084784	CTSS	Cathepsin S
CAFS_HM_T_00007115	YWHAG	14-3-3 protein gamma

## Sheet: 430 proteins in "re_5h vs ck_0h
Table S8. The distribution of liver differentially abundant proteins (DAPs) in venn diagram.
430 DAPs in "re_5h vs ck_0h" only
Protein	Gene name	Annotation
CAFS_HM_T_00037442	STAG2	Cohesin subunit SA-2
CAFS_HM_T_00020610	ACTN1	Alpha-actinin-1
CAFS_HM_T_00082375	CDC42EP1	Cdc42 effector protein 1
CAFS_HM_T_00087429	CTRL	Chymotrypsin-like protease CTRL-1
CAFS_HM_T_00071989	c3	Complement C3 (Fragment)
CAFS_HM_T_00041640	CAMK2B	Calcium/calmodulin-dependent protein kinase type II subunit beta
CAFS_HM_T_00040654	RASSF2	Ras association domain-containing protein 2
CAFS_HM_T_00020784	rtn1-a	Reticulon-1-A
CAFS_HM_T_00041137	PLXND1	Plexin-D1
CAFS_HM_T_00067519	med22	Mediator of RNA polymerase II transcription subunit 22
CAFS_HM_T_00017479	krt18	Keratin, type I cytoskeletal 18
CAFS_HM_T_00038221	Slc6a8	Sodium- and chloride-dependent creatine transporter 1
CAFS_HM_T_00009032	FBN2	Fibrillin-2
CAFS_HM_T_00085068	S100a1	Protein S100-A1
CAFS_HM_T_00021865	DDX21	Nucleolar RNA helicase 2
CAFS_HM_T_00049080	PARVA	Alpha-parvin
CAFS_HM_T_00062517	ANO10	Anoctamin-10
CAFS_HM_T_00029953	--	--
CAFS_HM_T_00053830	WIPF2	WAS/WASL-interacting protein family member 2
CAFS_HM_T_00007248	Parp14	Poly [ADP-ribose] polymerase 14
CAFS_HM_T_00081392	FHL2	Four and a half LIM domains protein 2
CAFS_HM_T_00071811	Fgg	Fibrinogen gamma chain
CAFS_HM_T_00030564	--	--
CAFS_HM_T_00003702	SLC27A6	Long-chain fatty acid transport protein 6
CAFS_HM_T_00072318	cyp3a27	Cytochrome P450 3A27
CAFS_HM_T_00044017	LASP1	LIM and SH3 domain protein 1
CAFS_HM_T_00024834	HMGB3	High mobility group protein B3
CAFS_HM_T_00077951	IFI44	Interferon-induced protein 44
CAFS_HM_T_00004039	Lox	Protein-lysine 6-oxidase
CAFS_HM_T_00004025	SMTNL1	Smoothelin-like protein 1
CAFS_HM_T_00008606	Lama3	Laminin subunit alpha-3
CAFS_HM_T_00077687	cahz	Carbonic anhydrase
CAFS_HM_T_00073761	ttyh3	Protein tweety homolog 3
CAFS_HM_T_00090222	MDH1	Malate dehydrogenase, cytoplasmic
CAFS_HM_T_00051160	PDLIM4	PDZ and LIM domain protein 4
CAFS_HM_T_00027861	Tinagl1	Tubulointerstitial nephritis antigen-like
CAFS_HM_T_00064296	Ppp1r12c	Protein phosphatase 1 regulatory subunit 12C
CAFS_HM_T_00088954	CTSC	Dipeptidyl peptidase 1
CAFS_HM_T_00015210	crlf3	Cytokine receptor-like factor 3
CAFS_HM_T_00003676	LMNB1	Lamin-B1
CAFS_HM_T_00048864	--	Myosin regulatory light chain 2, smooth muscle minor isoform
CAFS_HM_T_00091167	QPCT	Glutaminyl-peptide cyclotransferase
CAFS_HM_T_00054153	--	Plasticin
CAFS_HM_T_00014583	hba	Hemoglobin subunit alpha
CAFS_HM_T_00046638	MRC1L1	Macrophage mannose receptor 1-like protein 1
CAFS_HM_T_00015863	MYL4	Myosin light chain 4
CAFS_HM_T_00078438	Ugt2a3	UDP-glucuronosyltransferase 2A3
CAFS_HM_T_00071321	P4HB	Protein disulfide-isomerase
CAFS_HM_T_00060769	vim	Vimentin
CAFS_HM_T_00087255	NLRP3	NACHT, LRR and PYD domains-containing protein 3
CAFS_HM_T_00053276	LIMS1	LIM and senescent cell antigen-like-containing domain protein 1
CAFS_HM_T_00017820	--	Tubulin beta-6 chain
CAFS_HM_T_00011001	FBN1	Fibrillin-1
CAFS_HM_T_00016595	Cyp27a1	Sterol 26-hydroxylase, mitochondrial
CAFS_HM_T_00003386	Rab3c	Ras-related protein Rab-3C
CAFS_HM_T_00057775	csp	Cysteine string protein
CAFS_HM_T_00065701	DAO	D-amino-acid oxidase
CAFS_HM_T_00024660	endouc	Poly(U)-specific endoribonuclease-C
CAFS_HM_T_00057018	--	6-phosphofructo-2-kinase/fructose-2,6-biphosphatase
CAFS_HM_T_00071607	RBM47	RNA-binding protein 47
CAFS_HM_T_00015543	--	Beta-galactoside-binding lectin
CAFS_HM_T_00059298	RSU1	Ras suppressor protein 1
CAFS_HM_T_00082332	Upp1	Uridine phosphorylase 1
CAFS_HM_T_00075110	RPAP2	Putative RNA polymerase II subunit B1 CTD phosphatase RPAP2
CAFS_HM_T_00062345	Cpa1	Carboxypeptidase A1
CAFS_HM_T_00009527	HDGFRP3	Hepatoma-derived growth factor-related protein 3
CAFS_HM_T_00035299	eif4ebp3l	Eukaryotic translation initiation factor 4E-binding protein 3-like
CAFS_HM_T_00077024	EIF4A2	Eukaryotic initiation factor 4A-II
CAFS_HM_T_00085383	Ethe1	Protein ETHE1, mitochondrial
CAFS_HM_T_00007349	ILK	Integrin-linked protein kinase
CAFS_HM_T_00076280	EPB41	Protein 4.1
CAFS_HM_T_00075269	MYO7A	Myosin-VIIa
CAFS_HM_T_00011946	MGAM	Maltase-glucoamylase, intestinal
CAFS_HM_T_00086755	MYO1C	Myosin-Ic
CAFS_HM_T_00036489	--	Lysozyme g
CAFS_HM_T_00078089	Slc7a8	Large neutral amino acids transporter small subunit 2
CAFS_HM_T_00024315	rap1b	Ras-related protein Rap-1b
CAFS_HM_T_00024448	Tmpo	Lamina-associated polypeptide 2, isoform beta
CAFS_HM_T_00018859	Sept9	Septin-9
CAFS_HM_T_00071979	c3	Complement C3 (Fragment)
CAFS_HM_T_00053791	LY75	Lymphocyte antigen 75
CAFS_HM_T_00078462	TNS1	Tensin-1
CAFS_HM_T_00023085	adss	Adenylosuccinate synthetase isozyme 2
CAFS_HM_T_00054831	ITIH4	Inter-alpha-trypsin inhibitor heavy chain H4
CAFS_HM_T_00086340	SLC1A5	Neutral amino acid transporter B(0)
CAFS_HM_T_00086998	Capn9	Calpain-9
CAFS_HM_T_00023100	Mgst3	Microsomal glutathione S-transferase 3
CAFS_HM_T_00012708	Pglyrp2	N-acetylmuramoyl-L-alanine amidase
CAFS_HM_T_00081762	Upp2	Uridine phosphorylase 2
CAFS_HM_T_00065290	CELA2A	Chymotrypsin-like elastase family member 2A
CAFS_HM_T_00068612	ERAP2	Endoplasmic reticulum aminopeptidase 2
CAFS_HM_T_00036899	pdlim7	PDZ and LIM domain protein 7
CAFS_HM_T_00048147	HYPK	Huntingtin-interacting protein K
CAFS_HM_T_00081640	hoxd13a	Homeobox protein Hox-D13a
CAFS_HM_T_00038520	SEPT2	Septin-2
CAFS_HM_T_00090949	Capn1	Calpain-1 catalytic subunit
CAFS_HM_T_00071990	c3	Complement C3 (Fragment)
CAFS_HM_T_00005616	Gpx4	Phospholipid hydroperoxide glutathione peroxidase, mitochondrial
CAFS_HM_T_00076677	ITGB1	Integrin beta-1
CAFS_HM_T_00021903	DEGS1	Sphingolipid delta(4)-desaturase DES1
CAFS_HM_T_00072339	Itgal	Integrin alpha-L
CAFS_HM_T_00017489	endoua	Poly(U)-specific endoribonuclease-A
CAFS_HM_T_00022110	cbara1	Calcium uptake protein 1, mitochondrial
CAFS_HM_T_00059104	--	Ig lambda chain C region
CAFS_HM_T_00040732	Sorbs3	Vinexin
CAFS_HM_T_00052091	ARPC3	Actin-related protein 2/3 complex subunit 3
CAFS_HM_T_00083396	DNASE2	Deoxyribonuclease-2-alpha
CAFS_HM_T_00065764	CPI17	Protein phosphatase 1 regulatory subunit 14A
CAFS_HM_T_00073666	P4HB	Protein disulfide-isomerase
CAFS_HM_T_00018569	DYNC1I2	Cytoplasmic dynein 1 intermediate chain 2
CAFS_HM_T_00070651	ucp2	Mitochondrial uncoupling protein 2
CAFS_HM_T_00005053	--	Elastase-1
CAFS_HM_T_00063619	CKMT1	Creatine kinase U-type, mitochondrial
CAFS_HM_T_00057603	GPR182	G-protein coupled receptor 182
CAFS_HM_T_00071824	SYNPO2	Synaptopodin-2
CAFS_HM_T_00089914	Emilin1	EMILIN-1
CAFS_HM_T_00022443	grp-a	Galectin-related protein A
CAFS_HM_T_00068403	tmem93	Transmembrane protein 93
CAFS_HM_T_00086636	dph1	Diphthamide biosynthesis protein 1
CAFS_HM_T_00081008	Ankrd52	Serine/threonine-protein phosphatase 6 regulatory ankyrin repeat subunit C
CAFS_HM_T_00025589	C1QL4	Complement C1q-like protein 4
CAFS_HM_T_00089710	NID2	Nidogen-2
CAFS_HM_T_00007340	STOM	Erythrocyte band 7 integral membrane protein
CAFS_HM_T_00044365	Itgad	Integrin alpha-D
CAFS_HM_T_00026796	PARP12	Poly [ADP-ribose] polymerase 12
CAFS_HM_T_00037707	CELA2A	Chymotrypsin-like elastase family member 2A
CAFS_HM_T_00046337	agxt2l1	Alanine--glyoxylate aminotransferase 2-like 1
CAFS_HM_T_00091052	DDX24	ATP-dependent RNA helicase DDX24
CAFS_HM_T_00080766	Nqo1	NAD(P)H dehydrogenase [quinone] 1
CAFS_HM_T_00070916	Creb1	Cyclic AMP-responsive element-binding protein 1
CAFS_HM_T_00029368	agr2	Anterior gradient protein 2 homolog
CAFS_HM_T_00001792	CBLN1	Cerebellin-1
CAFS_HM_T_00092436	--	UPF0317 protein C14orf159 homolog, mitochondrial
CAFS_HM_T_00016367	MYLK	Myosin light chain kinase, smooth muscle
CAFS_HM_T_00054819	ITIH3	Inter-alpha-trypsin inhibitor heavy chain H3
CAFS_HM_T_00076880	CYP8B1	Sterol 12α-hydroxylase
CAFS_HM_T_00023972	NLRC3	Protein NLRC3
CAFS_HM_T_00088378	Mcam	Cell surface glycoprotein MUC18
CAFS_HM_T_00013735	dnase1	Deoxyribonuclease-1
CAFS_HM_T_00032173	PALLD	Palladin
CAFS_HM_T_00092356	ADAM17	Disintegrin and metalloproteinase domain-containing protein 17
CAFS_HM_T_00078715	TGFBR2	TGF-beta receptor type-2
CAFS_HM_T_00064429	fbln1	Fibulin-1
CAFS_HM_T_00026281	BCAT1	Branched-chain-amino-acid aminotransferase, cytosolic
CAFS_HM_T_00078623	Col5a2	Collagen alpha-2(V) chain
CAFS_HM_T_00084915	--	Trypsin-1
CAFS_HM_T_00037445	Xiap	Baculoviral IAP repeat-containing protein 4
CAFS_HM_T_00066394	ABR	Active breakpoint cluster region-related protein
CAFS_HM_T_00005243	gcg	Glucagon
CAFS_HM_T_00049241	Synpo2	Synaptopodin-2
CAFS_HM_T_00090032	KRTCAP3	Keratinocyte-associated protein 3
CAFS_HM_T_00080460	STAT1	Signal transducer and activator of transcription 1
CAFS_HM_T_00020775	TRMT5	tRNA (guanine-N(1)-)-methyltransferase
CAFS_HM_T_00015632	Acly	ATP-citrate synthase
CAFS_HM_T_00020048	Wbp4	WW domain-binding protein 4
CAFS_HM_T_00061616	CPB1	Carboxypeptidase B
CAFS_HM_T_00071325	FGB	Fibrinogen beta chain
CAFS_HM_T_00088432	AIFM3	Apoptosis-inducing factor 3
CAFS_HM_T_00035411	CDHR2	Cadherin-related family member 2
CAFS_HM_T_00006824	TLN1	Talin-1
CAFS_HM_T_00025386	--	Hemagglutinin/amebocyte aggregation factor
CAFS_HM_T_00020870	NT5C2	Cytosolic purine 5&apos;-nucleotidase
CAFS_HM_T_00021860	slc30a6	Zinc transporter 6
CAFS_HM_T_00007135	NT5C2	Cytosolic purine 5&apos;-nucleotidase
CAFS_HM_T_00018111	Usp9x	Probable ubiquitin carboxyl-terminal hydrolase FAF-X
CAFS_HM_T_00016209	ERP27	Endoplasmic reticulum resident protein 27
CAFS_HM_T_00029521	ELMO1	Engulfment and cell motility protein 1
CAFS_HM_T_00052290	CEL	Bile salt-activated lipase (Fragment)
CAFS_HM_T_00080034	--	UPF0124 protein C13orf31 homolog
CAFS_HM_T_00054187	CDA	Cytidine deaminase
CAFS_HM_T_00001368	tf1	Serotransferrin-1
CAFS_HM_T_00024454	ldhb	L-lactate dehydrogenase B chain
CAFS_HM_T_00077861	Nrbp2	Nuclear receptor-binding protein 2
CAFS_HM_T_00030318	Cd209c	CD209 antigen-like protein C
CAFS_HM_T_00013914	vat1	Synaptic vesicle membrane protein VAT-1 homolog
CAFS_HM_T_00000968	SI	Sucrase-isomaltase, intestinal
CAFS_HM_T_00050376	UBE2G1	Ubiquitin-conjugating enzyme E2 G1
CAFS_HM_T_00016649	slc44a2	Choline transporter-like protein 2
CAFS_HM_T_00021110	MMRN2	Multimerin-2
CAFS_HM_T_00056015	PFKFB2	6-phosphofructo-2-kinase/fructose-2,6-biphosphatase 2
CAFS_HM_T_00078456	TNS	Tensin
CAFS_HM_T_00060246	ANXA13	Annexin A13
CAFS_HM_T_00011334	GNAO1	Guanine nucleotide-binding protein G(o) subunit alpha
CAFS_HM_T_00010173	GAN	Gigaxonin
CAFS_HM_T_00034123	--	Alpha-1-antitrypsin-like protein CM55-MS
CAFS_HM_T_00022812	Sorbs1	Sorbin and SH3 domain-containing protein 1
CAFS_HM_T_00069451	HSPB1	Heat shock protein beta-1
CAFS_HM_T_00015494	Mybpc2	Myosin-binding protein C, fast-type
CAFS_HM_T_00081146	SLC25A5	ADP/ATP translocase 2
CAFS_HM_T_00042658	A1CF	APOBEC1 complementation factor
CAFS_HM_T_00005311	OGN	Mimecan
CAFS_HM_T_00011231	--	Uncharacterized protein C19orf47 homolog
CAFS_HM_T_00016687	Fkbp11	Peptidyl-prolyl cis-trans isomerase FKBP11
CAFS_HM_T_00044688	Lsp1	Lymphocyte-specific protein 1
CAFS_HM_T_00012602	hbb2	Hemoglobin cathodic subunit beta
CAFS_HM_T_00078038	Cbln3	Cerebellin-3
CAFS_HM_T_00087448	TAGLN3	Transgelin-3
CAFS_HM_T_00078662	Gls	Glutaminase kidney isoform, mitochondrial
CAFS_HM_T_00044792	lce	Low choriolytic enzyme
CAFS_HM_T_00082878	PTPN6	Tyrosine-protein phosphatase non-receptor type 6
CAFS_HM_T_00054197	Camk1	Calcium/calmodulin-dependent protein kinase type 1
CAFS_HM_T_00089687	Gch1	GTP cyclohydrolase 1
CAFS_HM_T_00001845	ETNK1	Ethanolamine kinase 1
CAFS_HM_T_00053842	--	Keratin, type I cytoskeletal 50 kDa
CAFS_HM_T_00063801	TES	Testin
CAFS_HM_T_00061081	LIMD2	LIM domain-containing protein 2
CAFS_HM_T_00031744	lace1b	Lactation elevated protein 1 homolog B
CAFS_HM_T_00038712	ZNF131	Zinc finger protein 131
CAFS_HM_T_00030286	tpi1a	Triosephosphate isomerase A
CAFS_HM_T_00038885	DNASE1L3	Deoxyribonuclease gamma
CAFS_HM_T_00056248	itga5	Integrin alpha-5
CAFS_HM_T_00069939	Vcp	Transitional endoplasmic reticulum ATPase
CAFS_HM_T_00002375	--	--
CAFS_HM_T_00071538	PDLIM3	PDZ and LIM domain protein 3
CAFS_HM_T_00006993	SLC27A4	Long-chain fatty acid transport protein 4
CAFS_HM_T_00043487	Vti1a	Vesicle transport through interaction with t-SNAREs homolog 1A
CAFS_HM_T_00025305	PRF1	Perforin-1
CAFS_HM_T_00047132	--	Chymotrypsin A
CAFS_HM_T_00048267	ACOX3	Peroxisomal acyl-coenzyme A oxidase 3
CAFS_HM_T_00051946	C7	Complement component C7
CAFS_HM_T_00056507	AGRN	Agrin
CAFS_HM_T_00000711	CORO7	Coronin-7
CAFS_HM_T_00047699	PYGM	Glycogen phosphorylase, muscle form
CAFS_HM_T_00020330	ccdc109a	Coiled-coil domain-containing protein 109A
CAFS_HM_T_00017817	Ctsz	Cathepsin Z
CAFS_HM_T_00069043	Rps6ka4	Ribosomal protein S6 kinase alpha-4
CAFS_HM_T_00040325	OXCT1	Succinyl-CoA:3-ketoacid-coenzyme A transferase 1, mitochondrial
CAFS_HM_T_00019903	Csrp1	Cysteine and glycine-rich protein 1
CAFS_HM_T_00078506	VIL1	Villin-1
CAFS_HM_T_00090403	RPAP1	RNA polymerase II-associated protein 1
CAFS_HM_T_00061524	Rala	Ras-related protein Ral-A
CAFS_HM_T_00086973	Scg2	Secretogranin-2
CAFS_HM_T_00024483	DCN	Decorin
CAFS_HM_T_00069566	Cyp4v3	Cytochrome P450 4V3
CAFS_HM_T_00016615	MYH11	Myosin-11
CAFS_HM_T_00009938	gfap	Glial fibrillary acidic protein (Fragment)
CAFS_HM_T_00055381	KERA	Keratocan
CAFS_HM_T_00075825	Pak2	Serine/threonine-protein kinase PAK 2
CAFS_HM_T_00054486	CANT1	Soluble calcium-activated nucleotidase 1
CAFS_HM_T_00092107	RPS6KA	Ribosomal protein S6 kinase 2 alpha
CAFS_HM_T_00014056	CBX1	Chromobox protein homolog 1
CAFS_HM_T_00081679	cybrd1	Cytochrome b reductase 1
CAFS_HM_T_00028970	Ddah2	N(G),N(G)-dimethylarginine dimethylaminohydrolase 2
CAFS_HM_T_00055249	LMOD1	Leiomodin-1
CAFS_HM_T_00089912	Emilin1	EMILIN-1
CAFS_HM_T_00074299	SVIL	Supervillin
CAFS_HM_T_00069658	ANXA5	Annexin A5
CAFS_HM_T_00077336	--	Pancreatic alpha-amylase
CAFS_HM_T_00080750	COL6A3	Collagen alpha-3(VI) chain
CAFS_HM_T_00028007	CAP1	Adenylyl cyclase-associated protein 1
CAFS_HM_T_00085296	gapdhs	Glyceraldehyde 3-phosphate dehydrogenase, testis-specific
CAFS_HM_T_00029710	cfaD	Counting factor associated protein D
CAFS_HM_T_00085948	ECE2	Endothelin-converting enzyme 2
CAFS_HM_T_00024279	Cacna2d1	Voltage-dependent calcium channel subunit alpha-2/delta-1
CAFS_HM_T_00017204	URH1	Uridine nucleosidase 1
CAFS_HM_T_00077787	FAM49B	Protein FAM49B
CAFS_HM_T_00032236	PPAT	Amidophosphoribosyltransferase
CAFS_HM_T_00020983	VCL	Vinculin
CAFS_HM_T_00005955	Mfap2	Microfibrillar-associated protein 2
CAFS_HM_T_00051769	Sycn	Syncollin
CAFS_HM_T_00081120	ME3	NADP-dependent malic enzyme, mitochondrial
CAFS_HM_T_00057877	DNAH7	Dynein heavy chain 7, axonemal
CAFS_HM_T_00024184	ppp1r12a	Protein phosphatase 1 regulatory subunit 12A
CAFS_HM_T_00013964	scn4ab	Sodium channel protein type 4 subunit alpha B
CAFS_HM_T_00056393	FLNA	Filamin-A
CAFS_HM_T_00071798	ARFIP1	Arfaptin-1
CAFS_HM_T_00081409	PDZK1	Na(+)/H(+) exchange regulatory cofactor NHE-RF3
CAFS_HM_T_00053565	ATP2B4	Plasma membrane calcium-transporting ATPase 4
CAFS_HM_T_00048160	IQGAP1	Ras GTPase-activating-like protein IQGAP1
CAFS_HM_T_00015555	Sept9	Septin-9
CAFS_HM_T_00041710	CAMK2G	Calcium/calmodulin-dependent protein kinase type II subunit gamma
CAFS_HM_T_00013202	glyr1	Putative oxidoreductase GLYR1
CAFS_HM_T_00037419	TSTD1	Thiosulfate sulfurtransferase/rhodanese-like domain-containing protein 1
CAFS_HM_T_00063662	CALD1	Caldesmon
CAFS_HM_T_00012634	ICAM1	Intercellular adhesion molecule 1
CAFS_HM_T_00051562	RHOG	Rho-related GTP-binding protein RhoG
CAFS_HM_T_00036660	GNPDA2	Glucosamine-6-phosphate isomerase 2
CAFS_HM_T_00018240	NCK2	Cytoplasmic protein NCK2
CAFS_HM_T_00021205	--	--
CAFS_HM_T_00087019	FOLH1	Glutamate carboxypeptidase 2
CAFS_HM_T_00025333	IFRD1	Interferon-related developmental regulator 1
CAFS_HM_T_00077727	EMILIN2	EMILIN-2
CAFS_HM_T_00071148	atp1a1	Sodium/potassium-transporting ATPase subunit alpha-1
CAFS_HM_T_00067719	DDX31	Probable ATP-dependent RNA helicase DDX31
CAFS_HM_T_00027074	ALDH1L2	Probable 10-formyltetrahydrofolate dehydrogenase ALDH1L2
CAFS_HM_T_00052961	SPTBN1	Spectrin beta chain, brain 1
CAFS_HM_T_00080229	CD302	CD302 antigen
CAFS_HM_T_00009332	GLB1L2	Beta-galactosidase-1-like protein 2
CAFS_HM_T_00060271	apbb1ip	Amyloid beta A4 precursor protein-binding family B member 1-interacting protein
CAFS_HM_T_00037789	Lpxn	Leupaxin
CAFS_HM_T_00078168	Nlrc3	Protein NLRC3
CAFS_HM_T_00007023	Rabgap1	Rab GTPase-activating protein 1
CAFS_HM_T_00053458	Utp3	Something about silencing protein 10
CAFS_HM_T_00086195	tmem195	Alkylglycerol monooxygenase
CAFS_HM_T_00007510	alcama	CD166 antigen homolog A
CAFS_HM_T_00064294	athl1	Acid trehalase-like protein 1
CAFS_HM_T_00056619	Atp6ap1	V-type proton ATPase subunit S1
CAFS_HM_T_00077112	ANXA13	Annexin A13
CAFS_HM_T_00029830	PTDSS1	Phosphatidylserine synthase 1
CAFS_HM_T_00030573	ARHGEF2	Rho guanine nucleotide exchange factor 2
CAFS_HM_T_00017175	LPP	Lipoma-preferred partner homolog
CAFS_HM_T_00056233	Bin2	Bridging integrator 2
CAFS_HM_T_00080831	ARHGAP15	Rho GTPase-activating protein 15
CAFS_HM_T_00031504	CYP39A1	Oxysterol 7α-hydroxylase
CAFS_HM_T_00044890	--	Chymotrypsin B
CAFS_HM_T_00024566	TWF1	Twinfilin-1
CAFS_HM_T_00083470	RAB25	Ras-related protein Rab-25
CAFS_HM_T_00023205	tck1	Creatine kinase, testis isozyme
CAFS_HM_T_00019352	LARP4	La-related protein 4
CAFS_HM_T_00057884	Ogn	Mimecan
CAFS_HM_T_00063142	--	Histone H1
CAFS_HM_T_00008395	SCAMP4	Secretory carrier-associated membrane protein 4
CAFS_HM_T_00061666	--	Histone H1
CAFS_HM_T_00050362	GSN	Gelsolin
CAFS_HM_T_00061271	FAM49B	Protein FAM49B
CAFS_HM_T_00061797	FLNC	Filamin-C
CAFS_HM_T_00016361	des	Desmin
CAFS_HM_T_00018489	ABCC4	Multidrug resistance-associated protein 4
CAFS_HM_T_00001251	ptprc	Receptor-type tyrosine-protein phosphatase C
CAFS_HM_T_00091015	NLRP12	NACHT, LRR and PYD domains-containing protein 12
CAFS_HM_T_00085522	UBE2E2	Ubiquitin-conjugating enzyme E2
CAFS_HM_T_00015784	slc4a1	Band 3 anion exchange protein
CAFS_HM_T_00078512	SMOX	Spermine oxidase
CAFS_HM_T_00089086	F9	Coagulation factor IX
CAFS_HM_T_00024185	ppp1r12a	Protein phosphatase 1 regulatory subunit 12A
CAFS_HM_T_00071323	TRIM2	Tripartite motif-containing protein 2
CAFS_HM_T_00017862	ESYT1	Extended synaptotagmin-1
CAFS_HM_T_00036622	DOCK2	Dedicator of cytokinesis protein 2
CAFS_HM_T_00027689	Galnt12	Polypeptide N-acetylgalactosaminyltransferase 12
CAFS_HM_T_00070814	--	--
CAFS_HM_T_00071005	Gpm6b	Neuronal membrane glycoprotein M6-b
CAFS_HM_T_00087268	NLRP3	NACHT, LRR and PYD domains-containing protein 3
CAFS_HM_T_00090991	NLRP3	NACHT, LRR and PYD domains-containing protein 3
CAFS_HM_T_00058002	sdf4	45 kDa calcium-binding protein
CAFS_HM_T_00024851	Cfi	Complement factor I
CAFS_HM_T_00077813	Abcf2	ATP-binding cassette sub-family F member 2
CAFS_HM_T_00038866	SYPL1	Synaptophysin-like protein 1
CAFS_HM_T_00002484	--	Ig mu chain C region membrane-bound form
CAFS_HM_T_00065303	GDA	Guanine deaminase
CAFS_HM_T_00004455	EHD1	EH domain-containing protein 1
CAFS_HM_T_00051077	VDAC1	Voltage-dependent anion-selective channel protein 1
CAFS_HM_T_00006496	MINA	MYC-induced nuclear antigen
CAFS_HM_T_00011699	COTL1	Coactosin-like protein
CAFS_HM_T_00064193	RBPMS2	RNA-binding protein with multiple splicing 2
CAFS_HM_T_00085776	PSPH	Phosphoserine phosphatase
CAFS_HM_T_00009561	cyp1a1	Cytochrome P450 1A1
CAFS_HM_T_00072359	Cdcp1	CUB domain-containing protein 1
CAFS_HM_T_00083974	taf2	Transcription initiation factor TFIID subunit 2
CAFS_HM_T_00058176	DNAJC22	DnaJ homolog subfamily C member 22
CAFS_HM_T_00045575	Ripk3	Receptor-interacting serine/threonine-protein kinase 3
CAFS_HM_T_00003779	IL6ST	Interleukin-6 receptor subunit beta
CAFS_HM_T_00026223	Slc26a3	Chloride anion exchanger
CAFS_HM_T_00052415	FNBP1	Formin-binding protein 1
CAFS_HM_T_00019364	MYL6	Myosin light polypeptide 6
CAFS_HM_T_00033746	LAMA4	Laminin subunit alpha-4
CAFS_HM_T_00047133	--	Chymotrypsin A
CAFS_HM_T_00064858	fcho2	FCH domain only protein 2
CAFS_HM_T_00036378	SH3BGRL	SH3 domain-binding glutamic acid-rich-like protein
CAFS_HM_T_00083198	--	Trypsin-3 (Fragment)
CAFS_HM_T_00045845	COL4A6	Collagen alpha-6(IV) chain
CAFS_HM_T_00077172	Acot11	Acyl-coenzyme A thioesterase 11
CAFS_HM_T_00008957	LMNB2	Lamin-B2
CAFS_HM_T_00067108	ME2	NAD-dependent malic enzyme, mitochondrial
CAFS_HM_T_00075796	lamc1	Laminin subunit gamma-1
CAFS_HM_T_00053089	NUCKS1	Nuclear ubiquitous casein and cyclin-dependent kinases substrate
CAFS_HM_T_00057454	MYL9	Myosin regulatory light polypeptide 9
CAFS_HM_T_00082978	LMNA	Prelamin-A/C
CAFS_HM_T_00060935	SH3KBP1	SH3 domain-containing kinase-binding protein 1
CAFS_HM_T_00058522	nadl1.1	Neural cell adhesion molecule L1.1 (Fragment)
CAFS_HM_T_00013451	calu	Calumenin
CAFS_HM_T_00014736	FBXW9	F-box/WD repeat-containing protein 9
CAFS_HM_T_00021996	FBXO9	F-box only protein 9
CAFS_HM_T_00003130	ENDOG	Endonuclease G, mitochondrial
CAFS_HM_T_00022306	TMX1	Thioredoxin-related transmembrane protein 1
CAFS_HM_T_00033864	PPP2R5E	Serine/threonine-protein phosphatase 2A 56 kDa regulatory subunit epsilon isoform
CAFS_HM_T_00025586	C1QL4	Complement C1q-like protein 4
CAFS_HM_T_00071729	Rfc1	Replication factor C subunit 1
CAFS_HM_T_00066779	ANK1	Ankyrin-1
CAFS_HM_T_00012594	KANK2	KN motif and ankyrin repeat domain-containing protein 2
CAFS_HM_T_00028125	MYCBP	C-Myc-binding protein
CAFS_HM_T_00047471	C7orf52	Putative N-acetyltransferase C7orf52
CAFS_HM_T_00086633	SERPINF2	Alpha-2-antiplasmin
CAFS_HM_T_00007071	Itga1	Integrin alpha-1
CAFS_HM_T_00000966	SI	Sucrase-isomaltase, intestinal
CAFS_HM_T_00064723	HK2	Hexokinase-2
CAFS_HM_T_00075236	Arpc5	Actin-related protein 2/3 complex subunit 5
CAFS_HM_T_00019221	Uap1	UDP-N-acetylhexosamine pyrophosphorylase
CAFS_HM_T_00068155	EFNB1	Ephrin-B1
CAFS_HM_T_00048587	ndrg2	Protein NDRG2
CAFS_HM_T_00069183	SMTN	Smoothelin
CAFS_HM_T_00082002	PLEC	Plectin (Fragment)
CAFS_HM_T_00021265	CAPN2	Calpain-2 catalytic subunit
CAFS_HM_T_00068323	EEF2	Elongation factor 2
CAFS_HM_T_00054067	AVIL	Advillin
CAFS_HM_T_00044873	MMP2	72 kDa type IV collagenase
CAFS_HM_T_00064464	rsl24d1	Probable ribosome biogenesis protein RLP24
CAFS_HM_T_00000705	CORO7	Coronin-7
CAFS_HM_T_00057047	Pacsin1	Protein kinase C and casein kinase substrate in neurons protein 1
CAFS_HM_T_00068649	SECISBP2	Selenocysteine insertion sequence-binding protein 2
CAFS_HM_T_00081358	FN1	Fibronectin
CAFS_HM_T_00040368	Pgm5	Phosphoglucomutase-like protein 5
CAFS_HM_T_00018690	TGL2	Protein-glutamine gamma-glutamyltransferase 2
CAFS_HM_T_00072590	--	--
CAFS_HM_T_00068145	OPHN1	Oligophrenin-1
CAFS_HM_T_00071994	c3	Complement C3 (Fragment)
CAFS_HM_T_00038243	MECP2	Methyl-CpG-binding protein 2
CAFS_HM_T_00064787	hira	Protein HIRA
CAFS_HM_T_00032218	hook1	Protein Hook homolog 1
CAFS_HM_T_00037413	CYP4V2	Cytochrome P450 4V2
CAFS_HM_T_00032624	Crip2	Cysteine-rich protein 2
CAFS_HM_T_00082670	PNP	Purine nucleoside phosphorylase
CAFS_HM_T_00013295	--	--
CAFS_HM_T_00010984	ULK3	Serine/threonine-protein kinase ULK3
CAFS_HM_T_00008575	NRD1	Nardilysin
CAFS_HM_T_00022906	CAMK2G	Calcium/calmodulin-dependent protein kinase type II subunit gamma
CAFS_HM_T_00079607	Col4a2	Collagen alpha-2(IV) chain
CAFS_HM_T_00013652	GRN	Granulins
CAFS_HM_T_00055269	CYB5R1	NADH-cytochrome b5 reductase 1
CAFS_HM_T_00004099	DPYSL2	Dihydropyrimidinase-related protein 2
CAFS_HM_T_00062815	GIMAP8	GTPase IMAP family member 8
CAFS_HM_T_00010957	Sppl2a	Signal peptide peptidase-like 2A
CAFS_HM_T_00029198	--	--
CAFS_HM_T_00053010	Abhd6	Monoacylglycerol lipase ABHD6
CAFS_HM_T_00079515	--	Tubulin alpha chain
CAFS_HM_T_00091181	Col12a1	Collagen alpha-1(XII) chain
CAFS_HM_T_00091029	MTHFD1	C-1-tetrahydrofolate synthase, cytoplasmic
CAFS_HM_T_00067847	GTF2H2	General transcription factor IIH subunit 2
CAFS_HM_T_00049825	GFPT2	Glucosamine--fructose-6-phosphate aminotransferase [isomerizing] 2
CAFS_HM_T_00038302	Gramd3	GRAM domain-containing protein 3
CAFS_HM_T_00039535	CELA2A	Chymotrypsin-like elastase family member 2A

## Sheet: 196 overlap proteins between "h
Table S8. The distribution of liver differentially abundant proteins (DAPs) in venn diagram.
196 overlap DAPs between "hy_5h vs ck_0h" and "re_5h vs ck_0h"
Protein	Gene name	Annotation
CAFS_HM_T_00089300	OLFM4	Olfactomedin-4
CAFS_HM_T_00000241	CNN1	Calponin-1
CAFS_HM_T_00070745	CASP1	Caspase-1
CAFS_HM_T_00001018	--	--
CAFS_HM_T_00024547	AKR1B1	Aldose reductase
CAFS_HM_T_00051668	CFB	Complement factor B
CAFS_HM_T_00084818	--	--
CAFS_HM_T_00044782	lce	Low choriolytic enzyme
CAFS_HM_T_00051403	pafah1b1b	Lissencephaly-1 homolog B
CAFS_HM_T_00023593	Col6a4	Collagen alpha-4(VI) chain
CAFS_HM_T_00071290	FSCN1	Fascin
CAFS_HM_T_00001623	Psmb7	Proteasome subunit beta type-7
CAFS_HM_T_00043946	ACTA2	Actin, aortic smooth muscle
CAFS_HM_T_00024484	LUM	Lumican
CAFS_HM_T_00087865	Postn	Periostin
CAFS_HM_T_00000005	--	--
CAFS_HM_T_00090784	Ywhaz	14-3-3 protein zeta/delta
CAFS_HM_T_00049915	FABP6	Gastrotropin
CAFS_HM_T_00080171	lcp1	Plastin-2
CAFS_HM_T_00049725	VTN	Vitronectin
CAFS_HM_T_00081131	--	--
CAFS_HM_T_00061908	USH1C	Harmonin
CAFS_HM_T_00021182	rhbg	Ammonium transporter Rh type B
CAFS_HM_T_00001714	Vwa5a	von Willebrand factor A domain-containing protein 5A
CAFS_HM_T_00067068	DHRS11	Dehydrogenase/reductase SDR family member 11
CAFS_HM_T_00055319	Chia	Acidic mammalian chitinase
CAFS_HM_T_00006578	KLC4	Kinesin light chain 4
CAFS_HM_T_00040682	RENBP	N-acylglucosamine 2-epimerase
CAFS_HM_T_00017636	Gpx1	Glutathione peroxidase 1
CAFS_HM_T_00053251	COL6A1	Collagen alpha-1(VI) chain
CAFS_HM_T_00063980	OLFM4	Olfactomedin-4
CAFS_HM_T_00008082	--	--
CAFS_HM_T_00028574	--	Patr class I histocompatibility antigen, A-2 alpha chain
CAFS_HM_T_00064077	ANPEP	Aminopeptidase N
CAFS_HM_T_00084033	sdc2-a	Syndecan-2-A
CAFS_HM_T_00078382	dapl1-b	Death-associated protein-like 1-B
CAFS_HM_T_00022042	NCOA4	Nuclear receptor coactivator 4
CAFS_HM_T_00071322	--	Nattectin
CAFS_HM_T_00065868	--	--
CAFS_HM_T_00028679	S100A1	Protein S100-A1
CAFS_HM_T_00085198	--	--
CAFS_HM_T_00031182	Col12a1	Collagen alpha-1(XII) chain
CAFS_HM_T_00050943	VMO1	Vitelline membrane outer layer protein 1
CAFS_HM_T_00036138	TGFBI	Transforming growth factor-beta-induced protein ig-h3
CAFS_HM_T_00051663	Cfb	Complement factor B
CAFS_HM_T_00056333	Chia	Acidic mammalian chitinase
CAFS_HM_T_00078933	ITM2B	Integral membrane protein 2B
CAFS_HM_T_00074738	Cldn15	Claudin-15
CAFS_HM_T_00085126	CASP1	Caspase-1
CAFS_HM_T_00062863	fads2	Fatty acid desaturase 2
CAFS_HM_T_00089247	--	Nuclear factor 7, ovary
CAFS_HM_T_00031462	FABP7	Fatty acid-binding protein, brain
CAFS_HM_T_00011371	csgA	C-factor
CAFS_HM_T_00053257	COL6A2	Collagen alpha-2(VI) chain
CAFS_HM_T_00027003	CD9	CD9 antigen
CAFS_HM_T_00036396	D10Jhu81e	ES1 protein homolog, mitochondrial
CAFS_HM_T_00067100	PLA2G4C	Cytosolic phospholipase A2 gamma
CAFS_HM_T_00008641	LPL	Lipoprotein lipase
CAFS_HM_T_00000672	BTNL3	Butyrophilin-like protein 3
CAFS_HM_T_00084032	PGCP	Plasma glutamate carboxypeptidase
CAFS_HM_T_00046902	CCDC90A	Coiled-coil domain-containing protein 90A, mitochondrial
CAFS_HM_T_00015695	--	--
CAFS_HM_T_00011552	Herpud1	Homocysteine-responsive endoplasmic reticulum-resident ubiquitin-like domain member 1 protein
CAFS_HM_T_00076598	PYCARD	Apoptosis-associated speck-like protein containing a CARD
CAFS_HM_T_00038844	MMP9	Matrix metalloproteinase-9
CAFS_HM_T_00000608	--	Ig lambda chain C region
CAFS_HM_T_00088352	--	--
CAFS_HM_T_00054826	ITIH3	Inter-alpha-trypsin inhibitor heavy chain H3
CAFS_HM_T_00057166	Expi	Extracellular peptidase inhibitor (Fragment)
CAFS_HM_T_00074324	PFKP	6-phosphofructokinase type C
CAFS_HM_T_00006239	DNASE1L3	Deoxyribonuclease gamma
CAFS_HM_T_00089830	KIAA0284	Protein KIAA0284
CAFS_HM_T_00064966	DAB2	Disabled homolog 2
CAFS_HM_T_00013573	CORO1C	Coronin-1C
CAFS_HM_T_00047867	IL16	Pro-interleukin-16
CAFS_HM_T_00064079	AP3S2	AP-3 complex subunit sigma-2
CAFS_HM_T_00068710	EDF1	Endothelial differentiation-related factor 1 homolog
CAFS_HM_T_00059760	cry-dash	Cryptochrome DASH
CAFS_HM_T_00038982	NCS1	Neuronal calcium sensor 1
CAFS_HM_T_00078107	Rbp1	Retinol-binding protein 1
CAFS_HM_T_00064123	MUC2	Mucin-2
CAFS_HM_T_00000778	NLRC3	Protein NLRC3
CAFS_HM_T_00060369	PFKP	6-phosphofructokinase type C
CAFS_HM_T_00054528	VIP	VIP peptides
CAFS_HM_T_00054759	zgc:112255	Uncharacterized protein C1orf50 homolog
CAFS_HM_T_00089943	Smyd3	SET and MYND domain-containing protein 3
CAFS_HM_T_00009168	--	--
CAFS_HM_T_00069191	PSAT1	Phosphoserine aminotransferase
CAFS_HM_T_00032545	TMED5	Transmembrane emp24 domain-containing protein 5
CAFS_HM_T_00034508	Nt5c1a	Cytosolic 5&apos;-nucleotidase 1A
CAFS_HM_T_00062644	MUC2	Mucin-2
CAFS_HM_T_00090494	SPTBN5	Spectrin beta chain, brain 4
CAFS_HM_T_00073708	FGA	Fibrinogen alpha chain
CAFS_HM_T_00074898	PLS1	Plastin-1
CAFS_HM_T_00053649	Nampt	Nicotinamide phosphoribosyltransferase
CAFS_HM_T_00041460	--	--
CAFS_HM_T_00090259	Dmbt1	Deleted in malignant brain tumors 1 protein
CAFS_HM_T_00046226	--	Histone H1
CAFS_HM_T_00085124	pycard	Apoptosis-associated speck-like protein containing a CARD
CAFS_HM_T_00076236	MRC1L1	Macrophage mannose receptor 1-like protein 1
CAFS_HM_T_00052731	ACOT8	Acyl-coenzyme A thioesterase 8
CAFS_HM_T_00084880	CDH17	Cadherin-17 OS=Homo sapiens GN= PE=1 SV=3
CAFS_HM_T_00059115	pxn1	Pentraxin fusion protein
CAFS_HM_T_00008287	Krt17	Keratin, type I cytoskeletal 17
CAFS_HM_T_00009810	IDH2	Isocitrate dehydrogenase [NADP], mitochondrial
CAFS_HM_T_00023359	CFD	Complement factor D
CAFS_HM_T_00069924	c3	Complement C3 (Fragment)
CAFS_HM_T_00076980	Gipc1	PDZ domain-containing protein GIPC1
CAFS_HM_T_00056078	--	von Willebrand factor A domain-containing protein 1
CAFS_HM_T_00078073	ERMAP	Erythroid membrane-associated protein
CAFS_HM_T_00001890	UMOD	Uromodulin
CAFS_HM_T_00008153	C3L	Complement control protein
CAFS_HM_T_00015520	RAC2	Ras-related C3 botulinum toxin substrate 2
CAFS_HM_T_00003104	baiap2l2	Brain-specific angiogenesis inhibitor 1-associated protein 2-like protein 2
CAFS_HM_T_00092100	CTSL1	Cathepsin L1
CAFS_HM_T_00069919	c3	Complement C3 (Fragment)
CAFS_HM_T_00017150	MYO7A	Myosin-VIIa
CAFS_HM_T_00066067	CTSL1	Cathepsin L1
CAFS_HM_T_00087876	fam55c	Protein FAM55C
CAFS_HM_T_00080243	DPP4	Dipeptidyl peptidase 4
CAFS_HM_T_00031650	slc25a24	Calcium-binding mitochondrial carrier protein SCaMC-1
CAFS_HM_T_00052904	Mgea5	Bifunctional protein NCOAT
CAFS_HM_T_00071147	atp1a1	Sodium/potassium-transporting ATPase subunit alpha-1
CAFS_HM_T_00086375	Clca4	Calcium-activated chloride channel regulator 4
CAFS_HM_T_00006815	--	--
CAFS_HM_T_00053536	Chia	Acidic mammalian chitinase
CAFS_HM_T_00059585	LYZL1	Lysozyme-like protein 1
CAFS_HM_T_00055315	Chia	Acidic mammalian chitinase
CAFS_HM_T_00037345	Fhl1	Four and a half LIM domains protein 1
CAFS_HM_T_00019361	ITGB7	Integrin beta-7
CAFS_HM_T_00065779	NCCRP1	Non-specific cytotoxic cell receptor protein 1 homolog
CAFS_HM_T_00004821	mmp13	Collagenase 3 (Fragment)
CAFS_HM_T_00017194	atnb233	Sodium/potassium-transporting ATPase subunit beta-233
CAFS_HM_T_00064486	Usp47	Ubiquitin carboxyl-terminal hydrolase 47
CAFS_HM_T_00067599	Cyp1a1	Cytochrome P450 1A1
CAFS_HM_T_00079786	bzw1b	Basic leucine zipper and W2 domain-containing protein 1-B
CAFS_HM_T_00046550	Aloxe3	Epidermis-type lipoxygenase 3
CAFS_HM_T_00055270	Rnpep	Aminopeptidase B
CAFS_HM_T_00041318	--	Acyl-CoA desaturase
CAFS_HM_T_00044638	NCF2	Neutrophil cytosol factor 2
CAFS_HM_T_00051893	NEU3	Sialidase-3
CAFS_HM_T_00063121	--	Histone H1
CAFS_HM_T_00020682	--	Cystatin
CAFS_HM_T_00005300	Shisa4	Protein shisa-4
CAFS_HM_T_00054906	SLC38A3	Sodium-coupled neutral amino acid transporter 3
CAFS_HM_T_00063768	Mfge8	Lactadherin
CAFS_HM_T_00000978	--	Stonustoxin subunit alpha
CAFS_HM_T_00063160	HPRT1	Hypoxanthine-guanine phosphoribosyltransferase
CAFS_HM_T_00078503	ITGB2	Integrin beta-2
CAFS_HM_T_00080753	COL6A3	Collagen alpha-3(VI) chain
CAFS_HM_T_00009179	rnasel3	Ribonuclease-like 3
CAFS_HM_T_00029106	YWHAZ	14-3-3 protein zeta
CAFS_HM_T_00003950	Ak3	GTP:AMP phosphotransferase, mitochondrial
CAFS_HM_T_00081886	Aloxe3	Epidermis-type lipoxygenase 3
CAFS_HM_T_00077286	tf1	Serotransferrin-1
CAFS_HM_T_00047193	ITLN1	Intelectin-1
CAFS_HM_T_00031086	CTSB	Cathepsin B
CAFS_HM_T_00017743	Padi2	Protein-arginine deiminase type-2
CAFS_HM_T_00086286	--	High mobility group-T protein
CAFS_HM_T_00021595	KLC4	Kinesin light chain 4
CAFS_HM_T_00022785	--	N(4)-(Beta-N-acetylglucosaminyl)-L-asparaginase
CAFS_HM_T_00023588	Col6a6	Collagen alpha-6(VI) chain
CAFS_HM_T_00036801	Ctsf	Cathepsin F
CAFS_HM_T_00016021	--	--
CAFS_HM_T_00078043	C1QL4	Complement C1q-like protein 4
CAFS_HM_T_00044883	HSD11B2	Corticosteroid 11-beta-dehydrogenase isozyme 2
CAFS_HM_T_00036108	PDLIM3	PDZ and LIM domain protein 3
CAFS_HM_T_00051455	aldoc	Fructose-bisphosphate aldolase C
CAFS_HM_T_00075145	GLUL	Glutamine synthetase
CAFS_HM_T_00065858	epd	Ependymin
CAFS_HM_T_00060751	Yme1l1	ATP-dependent zinc metalloprotease YME1L1
CAFS_HM_T_00072803	samhd1	SAM domain and HD domain-containing protein 1
CAFS_HM_T_00009924	Anpep	Aminopeptidase N
CAFS_HM_T_00015421	--	Ferritin, middle subunit
CAFS_HM_T_00064560	TNC	Tenascin
CAFS_HM_T_00086369	Clca4	Calcium-activated chloride channel regulator 4
CAFS_HM_T_00001290	--	--
CAFS_HM_T_00001516	GBP3	Guanylate-binding protein 3
CAFS_HM_T_00069923	c3	Complement C3 (Fragment)
CAFS_HM_T_00004034	MPO	Myeloperoxidase
CAFS_HM_T_00038174	AMPD1	AMP deaminase 1
CAFS_HM_T_00057072	--	Zinc-binding protein A33
CAFS_HM_T_00050945	VMO1	Vitelline membrane outer layer protein 1 homolog
CAFS_HM_T_00063524	Ppn	Papilin
CAFS_HM_T_00085560	pbx2	Pre-B-cell leukemia transcription factor 2
CAFS_HM_T_00044281	G6PC	Glucose-6-phosphatase
CAFS_HM_T_00045157	anxa2-b	Annexin A2-B
CAFS_HM_T_00064041	Olfm4	Olfactomedin-4
CAFS_HM_T_00043988	--	--
CAFS_HM_T_00003287	--	Bitisilin-3 (Fragment)
CAFS_HM_T_00073455	--	--
CAFS_HM_T_00083577	SERPINB1	Leukocyte elastase inhibitor
CAFS_HM_T_00067097	PLA2G4C	Cytosolic phospholipase A2 gamma
CAFS_HM_T_00000627	--	NAD(P)(+)--arginine ADP-ribosyltransferase 2
CAFS_HM_T_00086469	alcama	CD166 antigen homolog A
CAFS_HM_T_00068582	HMGCR	3-hydroxy-3-methylglutaryl-coenzyme A reductase

## Sheet: 127 overlap proteins between "r
Table S8. The distribution of liver differentially abundant proteins (DAPs) in venn diagram.
127 overlap DAPs between "re_5h vs hy_0h" and "re_5h vs ck_0h"
Protein	Gene name	Annotation
CAFS_HM_T_00058061	Rsbn1	Round spermatid basic protein 1
CAFS_HM_T_00066046	CG10083	Drebrin-like protein
CAFS_HM_T_00063878	PARVA	Alpha-parvin
CAFS_HM_T_00006283	--	--
CAFS_HM_T_00082317	Nbeal2	Neurobeachin-like protein 2
CAFS_HM_T_00027551	--	--
CAFS_HM_T_00015573	ARHGDIB	Rho GDP-dissociation inhibitor 2
CAFS_HM_T_00074221	TGM1	Protein-glutamine gamma-glutamyltransferase K
CAFS_HM_T_00060587	IGKV4-1	Ig kappa chain V-IV region (Fragment)
CAFS_HM_T_00011271	CTSH	Cathepsin H
CAFS_HM_T_00056370	Slmap	Sarcolemmal membrane-associated protein
CAFS_HM_T_00051130	Sra1	Steroid receptor RNA activator 1
CAFS_HM_T_00008161	SVEP1	Sushi, von Willebrand factor type A, EGF and pentraxin domain-containing protein 1
CAFS_HM_T_00040130	VDAC2	Voltage-dependent anion-selective channel protein 2
CAFS_HM_T_00034910	--	--
CAFS_HM_T_00087294	--	--
CAFS_HM_T_00092419	Crip2	Cysteine-rich protein 2
CAFS_HM_T_00084655	FHL3	Four and a half LIM domains protein 3
CAFS_HM_T_00082797	ME1	NADP-dependent malic enzyme
CAFS_HM_T_00053222	PFKFB4	6-phosphofructo-2-kinase/fructose-2,6-biphosphatase 4
CAFS_HM_T_00082206	ZYX	Zyxin
CAFS_HM_T_00014931	Nlrc3	Protein NLRC3
CAFS_HM_T_00067845	Naaladl1	N-acetylated-alpha-linked acidic dipeptidase-like protein
CAFS_HM_T_00032503	TTR	Transthyretin
CAFS_HM_T_00074129	TPM4	Tropomyosin alpha-4 chain
CAFS_HM_T_00065317	ANXA1	Annexin A1
CAFS_HM_T_00027612	Tpd52	Tumor protein D52
CAFS_HM_T_00059400	--	Cytochrome c oxidase subunit 4 isoform 2, mitochondrial
CAFS_HM_T_00009324	Ehd2	EH domain-containing protein 2
CAFS_HM_T_00046726	Ampd3	AMP deaminase 3
CAFS_HM_T_00078356	Pfkl	6-phosphofructokinase, liver type
CAFS_HM_T_00077829	--	--
CAFS_HM_T_00050695	rpl35	60S ribosomal protein L35
CAFS_HM_T_00056934	Csrp1	Cysteine and glycine-rich protein 1
CAFS_HM_T_00028559	flot1	Flotillin-1
CAFS_HM_T_00085742	Schip1	Schwannomin-interacting protein 1
CAFS_HM_T_00040298	Was	Wiskott-Aldrich syndrome protein homolog
CAFS_HM_T_00034064	AKAP12	A-kinase anchor protein 12
CAFS_HM_T_00017170	Lpp	Lipoma-preferred partner homolog
CAFS_HM_T_00042897	Abcc3	Canalicular multispecific organic anion transporter 2
CAFS_HM_T_00006990	--	Protein AMBP (Fragment)
CAFS_HM_T_00018915	GSN	Gelsolin
CAFS_HM_T_00019014	DPT	Dermatopontin
CAFS_HM_T_00008224	C3	Complement C3
CAFS_HM_T_00084337	Ceacam3	Carcinoembryonic antigen-related cell adhesion molecule 3
CAFS_HM_T_00028841	Eppk1	Epiplakin
CAFS_HM_T_00082459	--	--
CAFS_HM_T_00037119	DIAPH2	Protein diaphanous homolog 2
CAFS_HM_T_00025437	Flnc	Filamin-C
CAFS_HM_T_00008502	YJEFN3	YjeF N-terminal domain-containing protein 3
CAFS_HM_T_00052769	CBLN3	Cerebellin-3
CAFS_HM_T_00030374	Psmb8	Proteasome subunit beta type-8
CAFS_HM_T_00087621	HEPHL1	Hephaestin-like protein 1
CAFS_HM_T_00016273	--	--
CAFS_HM_T_00026540	--	--
CAFS_HM_T_00068065	Msn	Moesin
CAFS_HM_T_00032279	SERPINB1	Leukocyte elastase inhibitor
CAFS_HM_T_00027614	FABP3	Fatty acid-binding protein, heart
CAFS_HM_T_00081260	ITGAV	Integrin alpha-V
CAFS_HM_T_00053902	--	--
CAFS_HM_T_00071700	UCHL1	Ubiquitin carboxyl-terminal hydrolase isozyme L1
CAFS_HM_T_00075245	FAM129A	Protein Niban
CAFS_HM_T_00086047	usp16	Ubiquitin carboxyl-terminal hydrolase 16
CAFS_HM_T_00065854	myo1c	Myosin-Ic
CAFS_HM_T_00020940	Pdlim1	PDZ and LIM domain protein 1
CAFS_HM_T_00003170	Camk2b	Calcium/calmodulin-dependent protein kinase type II subunit beta
CAFS_HM_T_00063020	--	--
CAFS_HM_T_00083277	Pbxip1	Pre-B-cell leukemia transcription factor-interacting protein 1
CAFS_HM_T_00038994	hpd	4-hydroxyphenylpyruvate dioxygenase
CAFS_HM_T_00016607	SDPR	Serum deprivation-response protein
CAFS_HM_T_00027144	CALD1	Caldesmon
CAFS_HM_T_00061499	Ptrf	Polymerase I and transcript release factor
CAFS_HM_T_00059830	--	Lipocalin
CAFS_HM_T_00067645	ATP2A3	Sarcoplasmic/endoplasmic reticulum calcium ATPase 3
CAFS_HM_T_00063792	cav1	Caveolin-1
CAFS_HM_T_00085065	S100B	Protein S100-B
CAFS_HM_T_00074105	UBA52	Ubiquitin-60S ribosomal protein L40
CAFS_HM_T_00001947	IGKC	Ig kappa chain C region
CAFS_HM_T_00017167	LPP	Lipoma-preferred partner
CAFS_HM_T_00015138	FMNL1	Formin-like protein 1
CAFS_HM_T_00001210	--	--
CAFS_HM_T_00029421	SCIN	Adseverin
CAFS_HM_T_00003972	ANXA3	Annexin A3
CAFS_HM_T_00070677	CD97	CD97 antigen
CAFS_HM_T_00022859	--	--
CAFS_HM_T_00053848	KRT16	Keratin, type I cytoskeletal 16
CAFS_HM_T_00003791	SYK	Tyrosine-protein kinase SYK
CAFS_HM_T_00025482	AGA	N(4)-(beta-N-acetylglucosaminyl)-L-asparaginase
CAFS_HM_T_00037168	tdo2a	Tryptophan 2,3-dioxygenase A
CAFS_HM_T_00027073	slc41a2	Solute carrier family 41 member 2
CAFS_HM_T_00085049	RAB13	Ras-related protein Rab-13
CAFS_HM_T_00008904	--	--
CAFS_HM_T_00022603	MYOF	Myoferlin
CAFS_HM_T_00037464	AHNAK	Neuroblast differentiation-associated protein AHNAK
CAFS_HM_T_00056822	CD63	CD63 antigen
CAFS_HM_T_00051111	dpysl3	Dihydropyrimidinase-related protein 3
CAFS_HM_T_00048978	CDH1	Cadherin-1
CAFS_HM_T_00063794	cav2	Caveolin-2
CAFS_HM_T_00063456	TLN2	Talin-2
CAFS_HM_T_00033394	Emilin1	EMILIN-1
CAFS_HM_T_00063299	Nt5c1a	Cytosolic 5&apos;-nucleotidase 1A
CAFS_HM_T_00017527	--	Alpha-enolase
CAFS_HM_T_00016432	GPD2	Glycerol-3-phosphate dehydrogenase, mitochondrial
CAFS_HM_T_00044034	rpl19	60S ribosomal protein L19
CAFS_HM_T_00058041	GDI1	Rab GDP dissociation inhibitor alpha
CAFS_HM_T_00007095	--	Fish-egg lectin
CAFS_HM_T_00042239	hbaa1	Hemoglobin subunit alpha
CAFS_HM_T_00073316	Nnmt	Nicotinamide N-methyltransferase
CAFS_HM_T_00033277	si:dkeyp-59a8.4	Uncharacterized transmembrane protein C1orf95 homolog
CAFS_HM_T_00077575	CNN2	Calponin-2
CAFS_HM_T_00028571	MR1	Major histocompatibility complex class I-related gene protein
CAFS_HM_T_00033513	SESN1	Sestrin-1
CAFS_HM_T_00056008	Dlgap4	Disks large-associated protein 4
CAFS_HM_T_00045272	Serpine1	Plasminogen activator inhibitor 1
CAFS_HM_T_00043779	Capg	Macrophage-capping protein
CAFS_HM_T_00002441	--	--
CAFS_HM_T_00013689	Sult3a1	Amine sulfotransferase
CAFS_HM_T_00012202	Tcf25	Transcription factor 25
CAFS_HM_T_00035257	Tmed11	Transmembrane emp24 domain-containing protein 11
CAFS_HM_T_00058714	Arl6ip5	PRA1 family protein 3
CAFS_HM_T_00065089	TCN1	Transcobalamin-1
CAFS_HM_T_00035137	ACSL1	Long-chain-fatty-acid--CoA ligase 1
CAFS_HM_T_00061958	ldha	L-lactate dehydrogenase A chain
CAFS_HM_T_00062063	ANXA2	Annexin A2
CAFS_HM_T_00043005	Vcl	Vinculin
CAFS_HM_T_00005179	CAPN2	Calpain-2 catalytic subunit
CAFS_HM_T_00045311	BAD	Bcl2 antagonist of cell death

## Sheet: 24 overlap proteins between "hy
Table S8. The distribution of liver differentially abundant proteins (DAPs) in venn diagram.
24 overlap DAPs between "hy_5h vs ck_0h" and "re_5h vs hy_0h"
Protein	Gene name	Annotation
CAFS_HM_T_00068639	acsbg2	Long-chain-fatty-acid--CoA ligase ACSBG2
CAFS_HM_T_00020032	PCK1	Phosphoenolpyruvate carboxykinase, cytosolic [GTP]
CAFS_HM_T_00047854	--	Ferritin, heavy subunit
CAFS_HM_T_00088675	RAB1A	Ras-related protein Rab-1A
CAFS_HM_T_00076582	GPC1	Glypican-1
CAFS_HM_T_00053895	HOMER3	Homer protein homolog 3
CAFS_HM_T_00061056	SPAC4H3.07c	Uncharacterized protein C4H3.07c
CAFS_HM_T_00004918	Ggt5	Gamma-glutamyltransferase 5
CAFS_HM_T_00086404	PLIN2	Perilipin-2
CAFS_HM_T_00039938	Comt	Catechol O-methyltransferase
CAFS_HM_T_00022408	cfl1-a	Cofilin-1-A
CAFS_HM_T_00069222	--	--
CAFS_HM_T_00069429	Ca4	Carbonic anhydrase 4
CAFS_HM_T_00000117	--	--
CAFS_HM_T_00040871	--	Probable glutamate receptor
CAFS_HM_T_00072375	--	Lectoxin-Lio1
CAFS_HM_T_00001288	CD48	CD48 antigen
CAFS_HM_T_00048703	F13a1	Coagulation factor XIII A chain
CAFS_HM_T_00074004	isyna1-a	Inositol-3-phosphate synthase 1-A
CAFS_HM_T_00086239	--	Nattectin
CAFS_HM_T_00074024	isyna1-a	Inositol-3-phosphate synthase 1-A
CAFS_HM_T_00031871	THBS1	Thrombospondin-1
CAFS_HM_T_00036892	SLC39A8	Zinc transporter ZIP8
CAFS_HM_T_00028509	stard3	StAR-related lipid transfer protein 3

## Sheet: 45 overlap proteins among "hy_5
Table S8. The distribution of liver differentially abundant proteins (DAPs) in venn diagram.
45 overlap DAPs among "hy_5h vs ck_0h", "re_5h vs hy_0h" and "re_5h vs ck_0h"
Protein	Gene name	Annotation
CAFS_HM_T_00000074	cygb1	Cytoglobin-1
CAFS_HM_T_00024622	b2m	Beta-2-microglobulin
CAFS_HM_T_00012823	ANKS4B	Ankyrin repeat and SAM domain-containing protein 4B
CAFS_HM_T_00045016	Cd81	CD81 antigen
CAFS_HM_T_00073456	CD48	CD48 antigen
CAFS_HM_T_00018176	HO-1	Heme oxygenase-1
CAFS_HM_T_00089128	GMFG	Glia maturation factor gamma
CAFS_HM_T_00023764	C1QL2	Complement C1q-like protein 2
CAFS_HM_T_00045368	Ptgr1	Prostaglandin reductase 1
CAFS_HM_T_00005419	ptprc	Receptor-type tyrosine-protein phosphatase C
CAFS_HM_T_00030303	--	Keratin, type I cytoskeletal 50 kDa
CAFS_HM_T_00091530	SPINT1	Kunitz-type protease inhibitor 1
CAFS_HM_T_00056473	--	Alpha-enolase
CAFS_HM_T_00062604	GAL	Galanin
CAFS_HM_T_00037535	GNPDA1	Glucosamine-6-phosphate isomerase 1
CAFS_HM_T_00009159	--	--
CAFS_HM_T_00076108	Nlrc3	Protein NLRC3
CAFS_HM_T_00028635	--	--
CAFS_HM_T_00090021	--	--
CAFS_HM_T_00067712	--	--
CAFS_HM_T_00081885	Ceacam3	Carcinoembryonic antigen-related cell adhesion molecule 3
CAFS_HM_T_00070702	samhd1	SAM domain and HD domain-containing protein 1
CAFS_HM_T_00019321	--	Intermediate filament protein ON3
CAFS_HM_T_00013316	--	Ig mu chain C region membrane-bound form
CAFS_HM_T_00058095	Hspg2	Basement membrane-specific heparan sulfate proteoglycan core protein
CAFS_HM_T_00049946	Epdr1	Mammalian ependymin-related protein 1
CAFS_HM_T_00002920	--	DLA class II histocompatibility antigen, DR-1 beta chain
CAFS_HM_T_00085027	--	--
CAFS_HM_T_00006719	--	Antihemorragic factor cHLP-B
CAFS_HM_T_00079799	igsf3	Immunoglobulin superfamily member 3
CAFS_HM_T_00043635	Itgb3	Integrin beta-3
CAFS_HM_T_00054834	ITIH3	Inter-alpha-trypsin inhibitor heavy chain H3
CAFS_HM_T_00052040	Vav2	Guanine nucleotide exchange factor VAV2
CAFS_HM_T_00014424	Timp2	Metalloproteinase inhibitor 2
CAFS_HM_T_00002918	HLA-DPA1	HLA class II histocompatibility antigen, DP alpha 1 chain
CAFS_HM_T_00052401	COL5A1	Collagen alpha-1(V) chain
CAFS_HM_T_00084575	SH3KBP1	SH3 domain-containing kinase-binding protein 1
CAFS_HM_T_00048762	PEA15	Astrocytic phosphoprotein PEA-15
CAFS_HM_T_00045124	ALDH1A2	Retinal dehydrogenase 2
CAFS_HM_T_00021542	--	Alcohol dehydrogenase 1
CAFS_HM_T_00025760	--	--
CAFS_HM_T_00061581	Oit3	Oncoprotein-induced transcript 3 protein
CAFS_HM_T_00016010	hmox	Heme oxygenase
CAFS_HM_T_00062638	--	Intestinal mucin-like protein (Fragment)
CAFS_HM_T_00021076	HK1	Hexokinase-1
