# Supplementary material for: Tandem Mass Tagging-Based Quantitative Proteomics Analysis Reveals Damage to the Liver and Brain of Hypophthalmichthys molitrix Exposed to Acute Hypoxia and Reoxygenation
Source: Antioxidants (Basel). 2022 Mar 19;11(3):589. doi: 10.3390/antiox11030589 (PMC8945220; doi:10.3390/antiox11030589)
Supplement: Supplementary file 1 [file antioxidants-11-00589-s001.zip › Table S9.xls]

## Sheet: Venn-brain 
Table S9. The distribution of brain differentially abundant proteins (DAPs) in venn diagram.
	Protein	Gene name	Annotation
22 DAPs in "hy_5h vs ck_0h" only	CAFS_HM_T_00026772	EPS8	Epidermal growth factor receptor kinase substrate 8
	CAFS_HM_T_00067442	TMEM132C	Transmembrane protein 132C
	CAFS_HM_T_00008224	C3	Complement C3
	CAFS_HM_T_00034766	plp	Myelin proteolipid protein
	CAFS_HM_T_00054834	ITIH3	Inter-alpha-trypsin inhibitor heavy chain H3
	CAFS_HM_T_00076386	CAPSL	Calcyphosin-like protein
	CAFS_HM_T_00089830	KIAA0284	Protein KIAA0284
	CAFS_HM_T_00065717	FBP1	Fructose-1,6-bisphosphatase 1
	CAFS_HM_T_00064527	ASPG	60 kDa lysophospholipase
	CAFS_HM_T_00024075	pyroxd1	Pyridine nucleotide-disulfide oxidoreductase domain-containing protein 1
	CAFS_HM_T_00020837	SAR1B	GTP-binding protein SAR1b
	CAFS_HM_T_00075296	fam110b	Protein FAM110B
	CAFS_HM_T_00001805	CAFS_HM_T_00001805	--
	CAFS_HM_T_00067100	PLA2G4C2	Cytosolic phospholipase A2 gamma
	CAFS_HM_T_00062320	Map1a	Microtubule-associated protein 1A
	CAFS_HM_T_00004449	TM7SF2	Delta(14)-sterol reductase
	CAFS_HM_T_00080586	Ift88	Intraflagellar transport protein 88 homolog
	CAFS_HM_T_00069880	CLDN6	Claudin-6
	CAFS_HM_T_00075276	AGXT	Serine--pyruvate aminotransferase, mitochondrial
	CAFS_HM_T_00067097	PLA2G4C1	Cytosolic phospholipase A2 gamma
	CAFS_HM_T_00013554	Arl6ip1	ADP-ribosylation factor-like protein 6-interacting protein 1
	CAFS_HM_T_00067482	gltp	Glycolipid transfer protein
12 DAPs in "re_5h vs hy_0h" only	CAFS_HM_T_00002764	F10	Coagulation factor X
	CAFS_HM_T_00020830	ZCCHC24	Zinc finger CCHC domain-containing protein 24
	CAFS_HM_T_00032224	Cyp2j6	Cytochrome P450 2J6
	CAFS_HM_T_00023528	Mertk	Tyrosine-protein kinase Mer OS=Mus musculus
	CAFS_HM_T_00006719	hsf	Antihemorragic factor cHLP-B
	CAFS_HM_T_00014274	Slc15a4	Solute carrier family 15 member 4
	CAFS_HM_T_00001368	tf1	Serotransferrin-1
	CAFS_HM_T_00065868	CAFS_HM_T_00065868	--
	CAFS_HM_T_00052763	zgc:123195	MMP37-like protein, mitochondrial
	CAFS_HM_T_00031740	nbas	Neuroblastoma-amplified sequence
	CAFS_HM_T_00085010	ELMO1	Engulfment and cell motility protein 1
	CAFS_HM_T_00081378	URH1	Probable uridine nucleosidase 1
42 DAPs in "re_5h vs ck_0h" only	CAFS_HM_T_00010229	Lrrc4	Leucine-rich repeat-containing protein 4
	CAFS_HM_T_00075413	GYG1	Glycogenin-1
	CAFS_HM_T_00085811	BACE1	Beta-secretase 1
	CAFS_HM_T_00008157	CFH	complement factor H
	CAFS_HM_T_00048403	CDA	Cytidine deaminase
	CAFS_HM_T_00052474	STBD1	Starch-binding domain-containing protein 1
	CAFS_HM_T_00025603	GBP1	Interferon-induced guanylate-binding protein 1
	CAFS_HM_T_00005946	CAFS_HM_T_00005946	--
	CAFS_HM_T_00047854	Fer	Ferritin, heavy subunit
	CAFS_HM_T_00031085	FDFT1	Squalene synthase
	CAFS_HM_T_00012819	pitpnc1	Cytoplasmic phosphatidylinositol transfer protein 1
	CAFS_HM_T_00089529	ADD3	Gamma-adducin
	CAFS_HM_T_00021067	CAFS_HM_T_00021067	--
	CAFS_HM_T_00006985	Ugcg	Ceramide glucosyltransferase
	CAFS_HM_T_00036752	STAG1	Cohesin subunit SA-1
	CAFS_HM_T_00006505	CAFS_HM_T_00006505	--
	CAFS_HM_T_00080753	COL6A3	Collagen alpha-3(VI) chain
	CAFS_HM_T_00001018	CAFS_HM_T_00001018	--
	CAFS_HM_T_00085647	sst1a	Somatostatin-1A
	CAFS_HM_T_00040365	BCR	Breakpoint cluster region protein
	CAFS_HM_T_00011768	Cacna2d1	Voltage-dependent calcium channel subunit alpha-2/delta-1
	CAFS_HM_T_00071979	c3α	Complement C3 (Fragment)
	CAFS_HM_T_00049397	slc22a6-a	Solute carrier family 22 member 6-A
	CAFS_HM_T_00031794	HPCAL1	Hippocalcin-like protein 1
	CAFS_HM_T_00058058	CR1	complement component (3b/4b) receptor 1
	CAFS_HM_T_00073432	CLIC6	Chloride intracellular channel protein 6
	CAFS_HM_T_00074387	mul1	Mitochondrial ubiquitin ligase activator of nfkb 1
	CAFS_HM_T_00017643	camkv	CaM kinase-like vesicle-associated protein
	CAFS_HM_T_00040661	Kcnip3	Calsenilin
	CAFS_HM_T_00036223	FAM13B	Protein FAM13B
	CAFS_HM_T_00016591	CYP27C1	Cytochrome P450 27C1
	CAFS_HM_T_00059624	CTNND2	Catenin delta-2
	CAFS_HM_T_00036925	GPRIN1	G protein-regulated inducer of neurite outgrowth 1
	CAFS_HM_T_00030244	Khdrbs3	KH domain-containing, RNA-binding, signal transduction-associated protein 3
	CAFS_HM_T_00011995	CCPG1	Cell cycle progression protein 1
	CAFS_HM_T_00010129	btbd11b	Ankyrin repeat and BTB/POZ domain-containing protein BTBD11-B
	CAFS_HM_T_00009568	CPLX3	Complexin-3
	CAFS_HM_T_00079799	igsf3	Immunoglobulin superfamily member 3
	CAFS_HM_T_00039853	Ntng2	Netrin-G2
	CAFS_HM_T_00086575	HEPACAM	Hepatocyte cell adhesion molecule
	CAFS_HM_T_00083340	DPY19L1	Protein dpy-19 homolog 1
	CAFS_HM_T_00072000	c3β	Complement C3 (Fragment)
8 overlap DAPs between "hy_5h vs ck_0h" and "re_5h vs ck_0h"	CAFS_HM_T_00077001*	usp33	Ubiquitin carboxyl-terminal hydrolase 33
	CAFS_HM_T_00039938*	Comt	Catechol O-methyltransferase
	CAFS_HM_T_00010089*	SLC6A15	Orphan sodium- and chloride-dependent neurotransmitter transporter
	CAFS_HM_T_00006235*	GGH	Gamma-glutamyl hydrolase G
	CAFS_HM_T_00063820*	prey	Protein preY, mitochondrial
	CAFS_HM_T_00010745*	DNER	Delta and Notch-like epidermal growth factor-related receptor
	CAFS_HM_T_00012176*	Mme	Neprilysin
	CAFS_HM_T_00071842*	CDKN2A	Cyclin-dependent kinase inhibitor 2A
6 overlap DAPs between "re_5h vs hy_0h" and "re_5h vs ck_0h"	CAFS_HM_T_00037475#	ARAP3	Arf-GAP with Rho-GAP domain, ANK repeat and PH domain-containing protein 3
	CAFS_HM_T_00060587#	IGKV4-1	Ig kappa chain V-IV region (Fragment)
	CAFS_HM_T_00067824#	TCN2	Transcobalamin-2
	CAFS_HM_T_00041172#	BSN	Protein bassoon
	CAFS_HM_T_00075896#	C1QL2	Complement C1q-like protein 2
	CAFS_HM_T_00085088#	CHRNB2	Neuronal acetylcholine receptor subunit beta-2
