# Supplementary material for: Tandem Mass Tagging-Based Quantitative Proteomics Analysis Reveals Damage to the Liver and Brain of Hypophthalmichthys molitrix Exposed to Acute Hypoxia and Reoxygenation
Source: Antioxidants (Basel). 2022 Mar 19;11(3):589. doi: 10.3390/antiox11030589 (PMC8945220; doi:10.3390/antiox11030589)
Supplement: Supplementary file 1 [file antioxidants-11-00589-s001.zip › Table S10.xls]

## Sheet: Sheet1
Table S10. Liver differentially abundant proteins (DAPs) involved in cytoskeletal organization.
	ID	Protein name	Annotation
Cluster1 (42)	CAFS_HM_T_00043946	ACTA2	Actin, aortic smooth muscle
	CAFS_HM_T_00052091	ARPC3	Actin-related protein 2/3 complex subunit 3
	CAFS_HM_T_00075236	Arpc5	Actin-related protein 2/3 complex subunit 5
	CAFS_HM_T_00074898	PLS1	Plastin-1
	CAFS_HM_T_00080171	lcp1	Plastin-2
	CAFS_HM_T_00071290	FSCN1	Fascin
	CAFS_HM_T_00078506	VIL1	Villin-1
	CAFS_HM_T_00055249	LMOD1	Leiomodin-1
	CAFS_HM_T_00024566	TWF1	Twinfilin-1
	CAFS_HM_T_00006824	TLN1	Talin-1
	CAFS_HM_T_00063456	TLN2	Talin-2
	CAFS_HM_T_00020983	VCL	Vinculin
	CAFS_HM_T_00056393	FLNA	Filamin-A
	CAFS_HM_T_00076677	ITGB1	Integrin beta-1
	CAFS_HM_T_00013573	CORO1C	Coronin-1C
	CAFS_HM_T_00032218	hook1	Protein Hook homolog 1
	CAFS_HM_T_00000241	CNN1	Calponin-1
	CAFS_HM_T_00005179	CAPN2	Calpain-2 catalytic subunit
	CAFS_HM_T_00018240	NCK2	Cytoplasmic protein NCK2
	CAFS_HM_T_00020330	ccdc109a	Coiled-coil domain-containing protein 109A
	CAFS_HM_T_00028007	CAP1	Adenylyl cyclase-associated protein 1
	CAFS_HM_T_00040298	Was	Wiskott-Aldrich syndrome protein homolog
	CAFS_HM_T_00040732	Sorbs3	Vinexin
	CAFS_HM_T_00043779	Capg	Macrophage-capping protein
	CAFS_HM_T_00051111	dpysl3	Dihydropyrimidinase-related protein 3
	CAFS_HM_T_00053830	WIPF2	WAS/WASL-interacting protein family member 2
	CAFS_HM_T_00057047	Pacsin1	Protein kinase C and casein kinase substrate in neurons protein 1
	CAFS_HM_T_00071798	ARFIP1	Arfaptin-1
	CAFS_HM_T_00089128	GMFG	Glia maturation factor gamma
	CAFS_HM_T_00004099	DPYSL2	Dihydropyrimidinase-related protein 2
	CAFS_HM_T_00009324	Ehd2	EH domain-containing protein 2
	CAFS_HM_T_00010173	GAN	Gigaxonin
	CAFS_HM_T_00015138	FMNL1	Formin-like protein 1
	CAFS_HM_T_00029521	ELMO1	Engulfment and cell motility protein 1
	CAFS_HM_T_00036622	DOCK2	Dedicator of cytokinesis protein 2
	CAFS_HM_T_00040368	Pgm5	Phosphoglucomutase-like protein 5
	CAFS_HM_T_00049080	PARVA	Alpha-parvin
	CAFS_HM_T_00051403	pafah1b1b	Lissencephaly-1 homolog B
	CAFS_HM_T_00061524	Rala	Ras-related protein Ral-A
	CAFS_HM_T_00063878	PARVA	Alpha-parvin
	CAFS_HM_T_00067712	--	--
	CAFS_HM_T_00026540	--	--
Cluster4 (11)	CAFS_HM_T_00020610	ACTN1	Alpha-actinin-1
	CAFS_HM_T_00022812	Sorbs1	Sorbin and SH3 domain-containing protein 1
	CAFS_HM_T_00024184	ppp1r12a	Protein phosphatase 1 regulatory subunit 12A
	CAFS_HM_T_00024185	ppp1r12a	Protein phosphatase 1 regulatory subunit 12A
	CAFS_HM_T_00029421	SCIN	Adseverin
	CAFS_HM_T_00032173	PALLD	Palladin
	CAFS_HM_T_00037119	DIAPH2	Protein diaphanous homolog 2
	CAFS_HM_T_00050362	GSN	Gelsolin
	CAFS_HM_T_00071824	SYNPO2	Synaptopodin-2
	CAFS_HM_T_00077575	CNN2	Calponin-2
	CAFS_HM_T_00085049	RAB13	Ras-related protein Rab-13
