# Supplementary figures and images for: Tandem Mass Tagging-Based Quantitative Proteomics Analysis Reveals Damage to the Liver and Brain of Hypophthalmichthys molitrix Exposed to Acute Hypoxia and Reoxygenation
Source: MDPI journal article supplement (doi:10.3390/antiox11030589), 2022-03-19

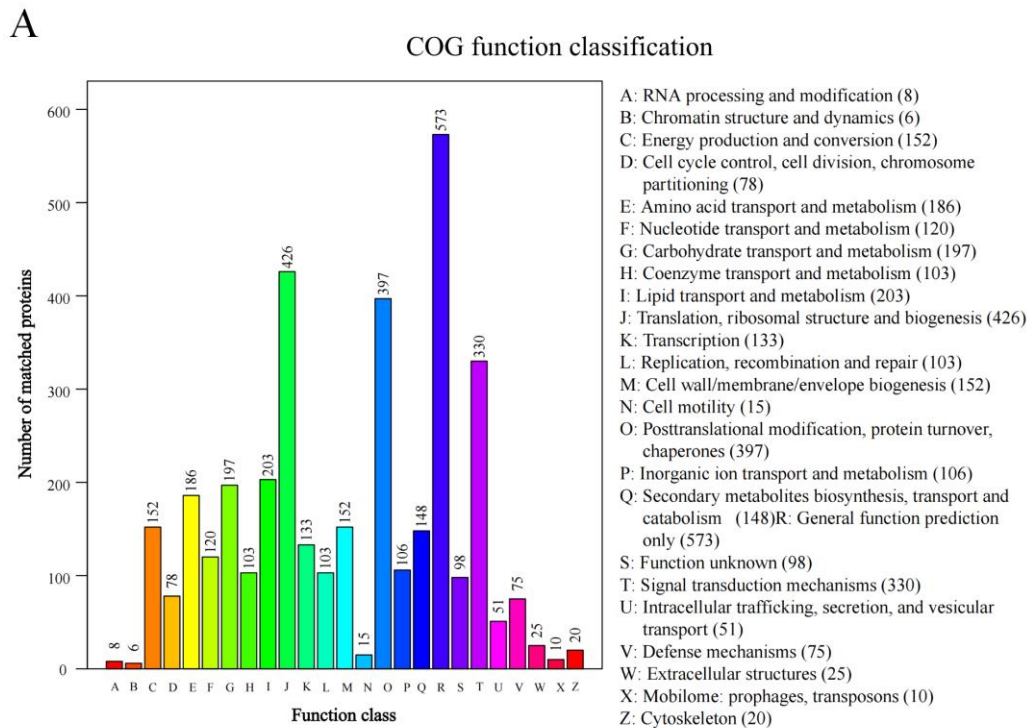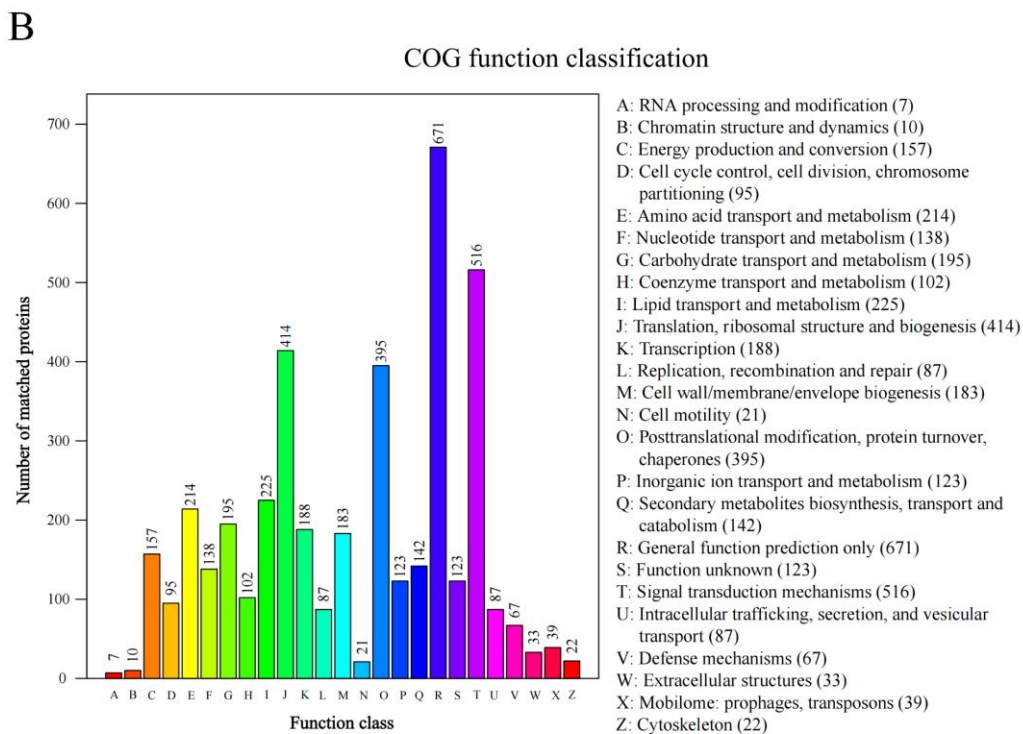

Figure S7. Proteins number distribution with COG in liver (A) and brain (B).

Supplement: s1 [file s1]

A

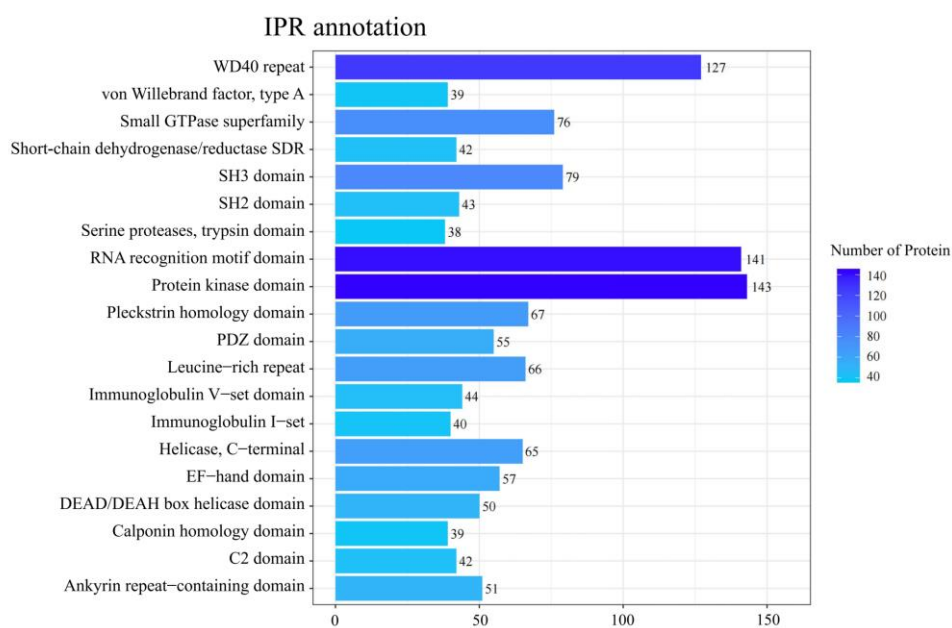

B

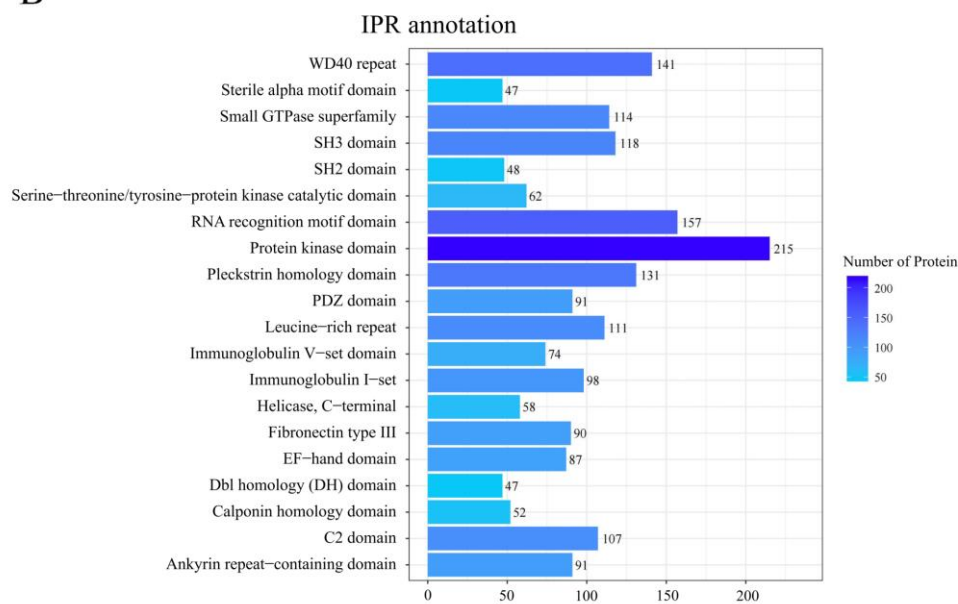

Figure S9. Proteins number distribution with IPR in liver (A) and brain (B).

Supplement: s1 [file s1]

A

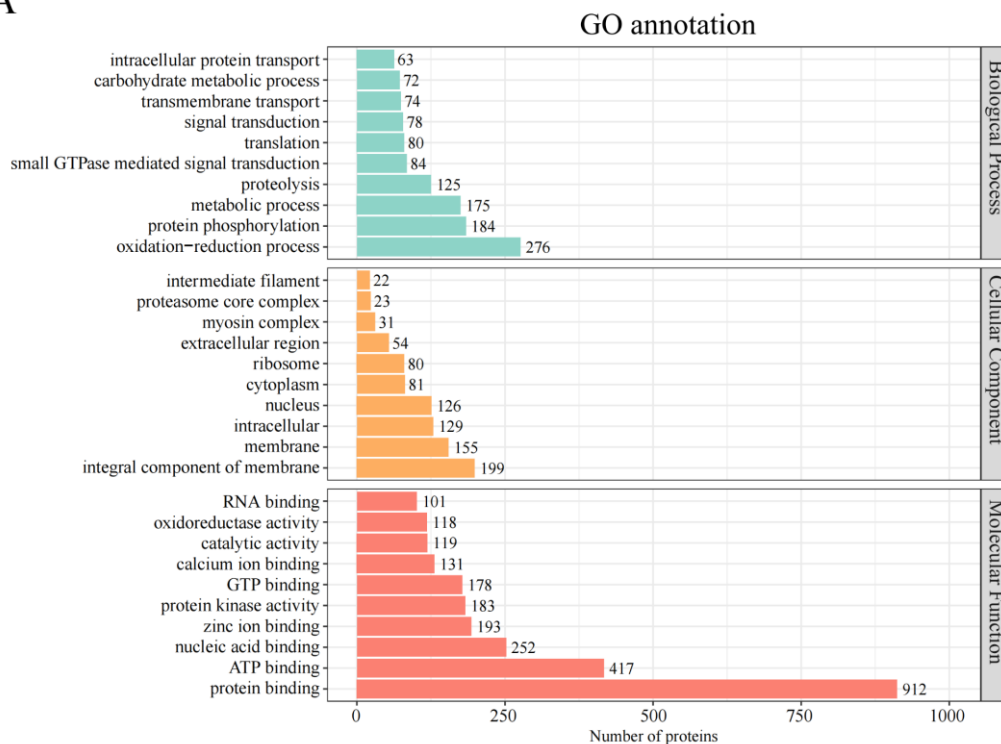

B

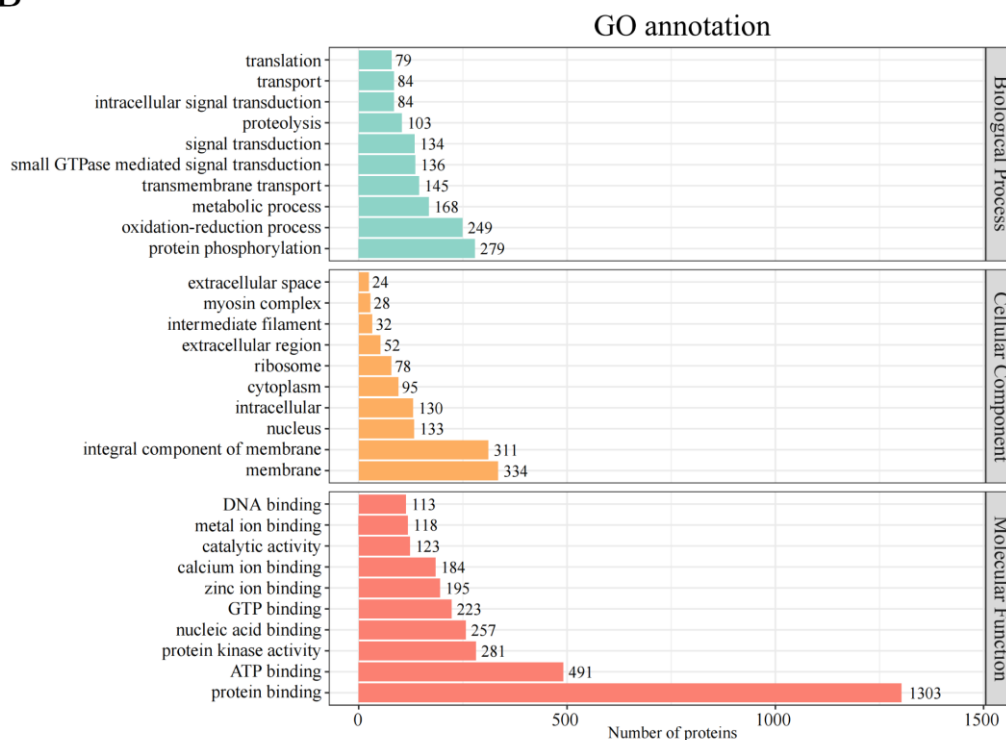

Figure S6. Proteins number distribution with GO in liver (A) and brain (B).

Supplement: s1 [file s1]
